# Supplementary material for: Proteome and Acetyl-Proteome Profiling of Camellia sinensis cv. ‘Anji Baicha’ during Periodic Albinism Reveals Alterations in Photosynthetic and Secondary Metabolite Biosynthetic Pathways
Source: Front Plant Sci. 2017 Dec 11;8:2104. doi: 10.3389/fpls.2017.02104 (PMC5732353; doi:10.3389/fpls.2017.02104)
Supplement: Table S1 — Proteomic profiles at three stages of ‘Anji Baicha’ leaf development. [file Table1.XLSX]

## Sheet: summary
Header line description of table 1			Table 1. MS/MS spetrum database search analysis summary
Total spectrums	Number of spectrums produced by mass spectrometer
Matched spetrums	Number of spectrums matched with alignment protein		Rep.ID	Total spectrums	Matched spetrums	Peptides	Unique peptides	Identified proteins	Quantifiable proteins
Peptides	Number of peptides whitch spetrums hit		Rep.1	272768	64002	37517	32680	7636	6272
Unique peptides	Number of unique peptides which spectrums hit		Rep.2	276360	65829	38403	33327	7669	6300
Identified proteins	Number of proteins detected by spetrum search analysis		Rep.3	273918	65177	38243	33157	7757	6365
Quantifiable proteins	Number of proteins quantifiable		Total	823046	195008	114163	99164	9097	7709
			At least in two Rep.					7637	6256
Header line description of worksheet "Protien_quant"
Protein accession	Protein accession number of database used for search
Protein description	Protein functional description
Gene name	Indicates the name of the gene that code for the protein sequence
MW [kDa]	Protein molecular weight ,unit [kDa]
Score	A simple rule to be used to judge whether a result is significant or not
Coverage [%]	Percent of identified peptdie sequence covering in protein sequence
#Peptides	Number of identified peptides
#PSMs	Number of spectrum which protein matched
#Unique peptides	Number of identified peptides that only come form this protein groups

## Sheet: Protein_quant
Protein information					Replicate 1					Replicate 2					Replicate 3					S1			S2			S3			Relative quantitation
Protein accession	Protein name	Times of identified	Times of quantifiable	MW [kDa]	Score	Coverage [%]	#Peptides	#PSMs	#Unique peptides	Score	Coverage [%]	#Peptides	#PSMs	#Unique peptides	Score	Coverage [%]	#Peptides	#PSMs	#Unique peptides	Rep.1	Rep.2	Rep.3	Rep.1	Rep.2	Rep.3	Rep.1	Rep.2	Rep.3	S2/S1 Ratio	S2/S1 P value	S3/S1 Ratio	S3/S1 P value	S3/S2 Ratio	S3/S2 P value
CSA000010.1	CAAX amino terminal protease family protein	2	2	184.5	6.0522	0.7	1	1	1						3.6453	0.7	1	1	1	0.646		0.805	1.118		1.079	1.364		1.184	1.51413	0.0449388	1.75603	0.0447393	1.15976	0.196952
CSA000011.1	sucrose synthase	3	3	92.422	323.31	58.6	46	148	42	323.31	55.8	43	149	39	323.31	56.8	44	142	40	1.501	1.587	1.588	0.777	0.754	0.751	0.495	0.443	0.478	0.488024	1.18434e-05	0.302823	4.85837e-06	0.620508	7.68291e-05
CSA000013.1	eukaryotic initiation factor 4A-14	3	3	55.022	44.872	56.3	21	76	1	67.783	55	22	79	1	45.593	53.4	22	80	1	0.852	0.79	1.096	1.026	1.053	1.023	1.178	1.233	0.842	1.13294	0.265829	1.18809	0.326893	1.04868	0.702384
CSA000019.1	cytokinin riboside 5'-monophosphate phosphoribohydrolase LOG8 isoform X1	3	3	23.596	13.008	14.9	2	3	2	6.5168	11.2	2	2	2	13.48	14.9	2	3	2	1.094	1.133	1.283	1.016	0.907	0.864	0.853	0.915	0.814	0.794017	0.0302106	0.735613	0.00876037	0.926444	0.274065
CSA000023.1	plasminogen activator inhibitor 1 RNA-binding protein-like	3	3	20.975	10.723	23.4	5	6	5	13.192	18.2	4	9	4	17.943	18.2	4	8	4	1.625	1.611	1.487	0.723	0.737	0.789	0.433	0.439	0.493	0.47618	6.86279e-05	0.289011	1.97525e-05	0.606936	0.000441965
CSA000028.1	proteasome subunit beta type-7-A	3	3	25.366	67.715	48.5	7	17	7	131.51	48.5	7	16	7	72.838	45.5	6	15	6	1.023	1.074	1.168	1.011	1.014	0.987	1.052	0.847	0.807	0.922511	0.123403	0.82879	0.0987783	0.898406	0.252575
CSA000036.1	pyrophosphate-energized vacuolar membrane proton pump-like	3	3	80.574	135.97	18.6	14	33	6	143.54	21.6	18	37	9	198.27	20.6	17	34	8	0.706	0.72	0.727	1.234	1.242	1.261	1.175	1.108	1.07	1.73572	8.04721e-07	1.55736	0.000216286	0.897244	0.0156663
CSA000041.1	SAC3 family protein B	3	3	179.05	3.512	0.9	1	1	1	5.2739	1.4	2	2	2	2.3682	0.9	1	1	1	0.871	0.97	0.827	1.03	0.843	1.028	1.147	1.211	1.209	1.08733	0.35919	1.33696	0.00315736	1.22958	0.0275014
CSA000042.1	glucan endo-1,3-beta-glucosidase 14 isoform X2	3	3	71.665	74.049	20.1	8	10	7	90.109	24.1	11	16	10	34.98	15.3	7	12	6	1.241	1.214	1.184	1.011	1.07	1.096	0.683	0.64	0.663	0.873042	0.00686773	0.545754	1.1667e-05	0.625118	0.000144629
CSA000047.1	serine/arginine repetitive matrix protein 2	1	1	143.64						1.764	0.9	1	1	1							0.952			1.117			0.94		1.17332		0.987395		0.84154
CSA000063.1	ribonuclease HI large subunit family protein	2	2	17.218						4.9096	20.5	2	2	2	6.1839	20.5	2	2	2		1.027	0.969		1.001	0.996		0.961	1.047	1.0005	0.987854	1.00601	0.918471	1.00551	0.910074
CSA000076.1	myosin-11 isoform X2	3	3	13.721	11.958	37.5	6	7	6	7.7826	27.5	5	7	5	8.9696	27.5	5	6	5	1.205	1.186	1.183	0.882	0.883	0.883	0.893	0.911	0.873	0.740907	1.48988e-06	0.749021	2.08974e-05	1.01095	0.428358
CSA000080.1	transcription factor Pcc1	2	0	9.5435						7.945	30.6	2	2	1	8.0101	30.6	2	2	1
CSA000082.1	photosystem II 5 kDa protein, chloroplastic-like	3	0	11.779	4.3373	12.4	1	1	1	4.7063	12.4	1	1	1	3.5821	12.4	1	1	1
CSA000087.1	regulation of nuclear pre-mRNA domain-containing protein 1A-like isoform X2	3	3	57.316	55.884	11.5	5	5	5	55.114	12.9	6	6	6	34.616	13.3	6	7	6	1.207	1.154	1.098	1	0.965	0.983	0.713	0.823	0.887	0.852269	0.00672829	0.700491	0.00445598	0.821913	0.0278377
CSA000093.1	cyclin-T1-5	3	2	63.693	8.4084	7.6	4	4	4	4.7312	5.3	3	3	3	3.5928	4.1	2	2	1	1.541	1.485		0.846	0.845		0.416	0.496		0.558824	0.00175553	0.301388	0.00212701	0.539326	0.0103841
CSA000101.1	signal recognition particle 54 kDa protein, chloroplastic	3	3	52.621	85.522	28.8	13	27	13	89.4	32.3	15	27	15	82.518	29.8	14	25	14	0.77	0.775	0.776	1.288	1.301	1.291	0.945	0.965	0.937	1.67169	2.93401e-08	1.22663	3.3103e-05	0.733763	3.05303e-06
CSA000102.1	signal recognition particle 54 kDa protein, chloroplastic	3	3	12.163	26.358	52.8	4	5	4	17.466	46.3	3	4	3	29.988	52.8	4	5	4	0.824	0.834	0.834	1.029	1.178	1.055	1.244	1.037	0.967	1.30899	0.00508655	1.30337	0.0388605	0.995708	0.96318
CSA000104.1	isoflavone reductase-like protein	3	3	34.371	45.971	69	17	50	6	42.636	60.6	15	49	5	16.135	62.9	16	46	5	0.914	0.951	0.909	0.917	0.978	0.882	1.209	1.073	1.184	1.00108	0.975827	1.24946	0.00624949	1.24811	0.0103168
CSA000107.1	photosystem I reaction center subunit III, chloroplastic-like	3	3	24.968	129.01	37.8	8	34	8	158.88	37.8	8	31	8	105.31	37.8	8	30	8	0.671	0.667	0.655	0.823	0.816	0.829	1.585	1.65	1.712	1.23833	1.30972e-05	2.48219	1.18234e-05	2.00446	2.34356e-05
CSA000108.1	protein ROOT HAIR DEFECTIVE 3 homolog 2	3	3	93.891	93.142	26.9	18	21	14	138.19	23.9	17	21	14	93.245	23.5	18	21	16	1.067	1.128	1.089	1.036	1.047	1.036	0.828	0.806	0.817	0.949756	0.0391425	0.746346	0.000125764	0.785829	7.00813e-06
CSA000111.1	ras-related protein RABF2a	2	2	21.378	2.2854	15.3	2	5	1	7.9498	15.3	2	4	1						0.795	0.89		0.963	1.037		1.323	1.113		1.18694	0.120328	1.4457	0.0826793	1.218	0.189317
CSA000112.1	regulatory protein NPR3	1	1	65.529						4.7691	4.8	3	3	3							1.03			1.06			0.895		1.02913		0.868932		0.84434
CSA000113.1	transmembrane protein 56-B	1	0	37.806	2.1687	3.3	1	1	1
CSA000114.1	protein argonaute 2	2	1	109.32						1.4673	1.6	2	2	2	3.0027	2	1	1	1		1.288			1.015			0.586		0.788043		0.454969		0.57734
CSA000118.1	40S ribosomal protein S26-3-like	3	3	20.4	34.663	36.3	7	16	7	12.289	29.6	6	15	6	13.594	29.6	6	13	6	1.582	1.658	1.616	0.599	0.563	0.595	0.594	0.637	0.646	0.36182	1.97175e-06	0.386532	3.36743e-06	1.0683	0.111865
CSA000133.1	putative formamidase C869.04 isoform X1	3	3	64.436	101.63	26.6	12	19	11	104.54	23.5	10	17	9	87.277	27.5	12	16	12	0.5	0.646	0.57	0.892	0.916	0.912	1.772	1.518	1.743	1.58508	0.00144484	2.93298	0.000259572	1.85037	0.000667668
CSA000139.1	caffeoylshikimate esterase	3	3	65.585	23.942	10.3	4	7	4	69.951	10.5	4	8	4	36.251	10.3	4	6	4	0.895	0.854	0.84	1.335	1.283	1.362	0.842	0.987	0.836	1.53727	8.30294e-05	1.02935	0.651923	0.669598	0.00130059
CSA000140.1	lesion inducing family protein	3	3	17.179	3.1721	10.3	2	3	2	1.9045	5.1	1	2	1	3.8162	10.3	2	2	2	1.157	0.985	1.173	1.072	1.145	1.078	0.705	0.863	0.676	0.993967	0.922731	0.676923	0.0129741	0.681032	0.00501545
CSA000147.1	callose synthase 10-like	3	3	32.067	16.664	18.9	5	6	5	32.178	22.1	6	9	6	22.423	26.3	6	7	6	1.089	1.106	1.045	1.078	1.043	1.044	0.848	0.781	0.888	0.976852	0.309747	0.776852	0.00262235	0.795261	0.00290159
CSA000151.1	protein argonaute 2-like	3	3	115.76	47.442	10.9	11	12	11	69.612	11.9	11	13	11	53.99	13.1	12	13	12	1.089	1.08	1.065	1.001	0.994	0.968	0.875	0.77	0.878	0.916203	0.00179596	0.780148	0.00281204	0.851502	0.0164771
CSA000153.1	UDP-glycosyltransferase 74F2-like	2	2	51.808	4.3143	3.4	2	2	2	1.5442	1.9	1	1	1						0.342	0.351		1.402	1.383		1.477	1.484		4.01876	0.000100979	4.27273	2.52721e-05	1.0632	0.0129789
CSA000154.1	sm-like protein LSM6A	3	3	14.778	4.3268	8.3	1	2	1	1.8843	8.3	1	2	1	6.0565	8.3	1	2	1	1.157	1.074	1.143	0.991	0.998	1.015	0.792	0.9	0.785	0.890338	0.00979073	0.734143	0.00270891	0.824567	0.00976828
CSA000166.1	LOW QUALITY PROTEIN: nucleobase-ascorbate transporter 11	1	1	82.344						2.7585	2.9	2	2	2							0.875			1.087			1.079		1.24229		1.23314		0.99264
CSA000168.1	WD repeat domain phosphoinositide-interacting protein 3	2	0	46.232	1.482	2.4	1	1	1						2.0639	2.4	1	1	1
CSA000172.1	hydroxyacylglutathione hydrolase cytoplasmic	3	3	33.177	119.09	36.7	9	19	9	162.87	39.7	10	19	10	134.13	37.4	9	16	9	1.042	0.99	1.027	0.974	1.009	0.968	0.965	0.977	1.002	0.964694	0.147088	0.962406	0.112566	0.997628	0.896247
CSA000176.1	probable receptor-like protein kinase At5g15080	1	0	44.314											1.6944	6.9	3	4	0
CSA000178.1	vacuolar protein sorting-associated protein 29	3	3	21.233	36.294	50.5	7	7	7	31.877	43.8	7	7	7	28.287	54.7	9	10	9	1.097	1.069	1.136	0.991	1.021	1.031	0.835	0.881	0.779	0.921563	0.0194508	0.755603	0.00159479	0.819915	0.00457644
CSA000179.1	3-dehydroquinate synthase homolog	3	3	48.802	13.281	11.5	6	8	6	24.917	17.4	8	11	8	17.859	19.2	8	8	8	0.794	0.782	0.814	1.058	1.067	1.154	1.223	1.267	1.092	1.37197	0.000756293	1.49874	0.00173989	1.09241	0.172135
CSA000180.1	aldose 1-epimerase	3	3	64.642	4.2661	4.9	3	3	3	33.751	9.7	5	6	5	33.15	10.9	6	7	6	0.799	0.893	0.871	1.48	1.366	1.424	0.76	0.703	0.693	1.66602	0.000196521	0.841202	0.0182905	0.504918	5.49889e-05
CSA000183.1	protein IQ-DOMAIN 31	3	3	66.548	48.114	9.2	4	4	4	13.652	7.3	4	4	4	31.965	7.3	3	4	3	1.365	1.302	1.552	0.921	0.897	0.841	0.577	0.668	0.408	0.630244	0.00272224	0.391799	0.00132535	0.621662	0.0136577
CSA000189.1	protein NRT1/ PTR FAMILY 3.1	3	0	12.526	1.7684	7.9	1	2	1	1.5243	7.9	1	1	1	1.8237	7.9	1	2	1
CSA000192.1	importin subunit alpha-4	3	3	57.517	66.809	30.3	12	21	9	54.917	27.8	11	16	7	97.996	24.6	11	18	7	1.224	1.175	1.303	0.926	0.969	0.926	0.758	0.806	0.65	0.762021	0.00182354	0.598055	0.00111837	0.784828	0.0138221
CSA000198.1	ubiquitin carboxyl-terminal hydrolase 13-like isoform X2	3	3	16.285	7.809	51.1	5	6	4	12.697	51.8	5	7	3	12.902	49.6	5	7	3	1.126	1.178	1.198	1.035	0.95	0.939	0.787	0.809	0.792	0.834951	0.00658197	0.681896	7.84821e-05	0.816689	0.00452642
CSA000199.1	ubiquitin carboxyl-terminal hydrolase 12 isoform X3	3	2	47.455	8.4964	45.9	14	17	3	5.826	43.5	13	20	2	8.95	45.9	14	16	3		1.068	1.088		0.918	0.969		0.996	0.911	0.875232	0.0390589	0.884508	0.104125	1.0106	0.858762
CSA000201.1	ubiquitin carboxyl-terminal hydrolase 13	2	1	7.091						2.18	16.9	1	1	1	1.4254	16.9	1	1	1		1.063			1.014			0.899		0.953904		0.84572		0.886588
CSA000202.1	ubiquitin carboxyl-terminal hydrolase 12-like	1	0	15.949											1.8447	20.3	3	5	1
CSA000203.1	ubiquitin carboxyl-terminal hydrolase 13-like isoform X2	3	3	9.5067	1.7972	10	1	1	1	1.4993	23.8	2	2	1	2.3697	10	1	1	1	1.146	1.184	1.148	1.072	1.059	1.027	0.72	0.682	0.767	0.907993	0.00423021	0.623634	9.23406e-05	0.686827	0.000297111
CSA000204.1	ubiquitin carboxyl-terminal hydrolase 13-like	1	0	35.846	2.6191	30.3	7	8	1
CSA000218.1	carbamoyl-phosphate synthase large chain, chloroplastic	3	3	135.65	159.38	15	16	23	6	171.04	13.5	15	22	4	103.98	15	18	26	4	1.378	1.26	1.347	1.034	1.066	1.068	0.472	0.519	0.446	0.794981	0.00181461	0.360602	3.29501e-05	0.453598	1.78565e-05
CSA000226.1	DNA-(apurinic or apyrimidinic site) lyase isoform X2	3	1	37.672	3.0181	6.7	2	2	2	11.783	7.6	2	2	2	6.7327	8.8	2	2	2	1.311			0.945			0.629			0.720824		0.479786		0.665608
CSA000231.1	haloacid dehalogenase-like hydrolase domain-containing protein At3g48420	3	3	35.182	42.686	30.8	9	18	9	24.118	24.7	8	17	8	23.303	24.7	8	14	8	0.37	0.428	0.407	0.786	0.829	0.837	2.116	1.958	1.972	2.03485	5.70332e-05	5.01743	7.07187e-06	2.46574	2.25519e-05
CSA000238.1	probable transaldolase	3	3	43.485	293.28	51.1	16	26	16	308.28	43.8	14	29	14	194.79	39.8	15	23	15	0.981	0.961	0.985	1.096	1.041	1.15	0.9	0.953	0.923	1.12299	0.0206228	0.948411	0.0418507	0.844539	0.00824607
CSA000241.1	probable galactinol--sucrose galactosyltransferase 1	3	3	83.533	37.027	11.9	8	11	8	90.696	13.4	8	12	8	104.39	13.4	8	11	8	1.243	1.127	1.079	0.872	0.904	0.904	0.995	0.955	1.025	0.777037	0.00677433	0.862569	0.0400935	1.11007	0.0127252
CSA000242.1	malate dehydrogenase	3	3	35.511	271.24	48.2	13	52	7	323.31	48.8	14	53	8	323.31	50.9	15	50	8	1.084	1.072	1.063	1.008	1.015	1.041	0.849	0.88	0.875	0.951848	0.0116757	0.808947	5.56799e-05	0.849869	0.000383535
CSA000249.1	protein transport protein Sec61 subunit beta	2	1	8.5879	2.8395	13.1	1	1	1	1.236	13.1	1	1	1						0.953			0.713			1.374			0.748164		1.44176		1.92707
CSA000260.1	60S ribosomal protein L13a-4	3	3	23.605	26.65	39.3	9	16	5	98.677	52.4	12	21	6	38.607	52.4	12	22	6	1.33	1.432	1.501	0.933	0.893	0.882	0.599	0.466	0.464	0.635233	0.000570299	0.358668	0.000167182	0.564623	0.00114437
CSA000266.1	asparagine synthetase	3	3	62.358	47.992	24.5	11	18	11	111.44	34.2	14	21	14	93.164	33	14	19	14	1.199	1.188	1.096	1.003	0.991	0.987	0.774	0.77	0.848	0.855871	0.00713205	0.686764	0.000921554	0.802415	0.00160309
CSA000278.1	eukaryotic initiation factor 4A-8	1	0	47.938						24.385	52.7	20	70	0
CSA000279.1	meiotically up-regulated gene 184 protein	2	2	84.26						8.439	4.3	2	2	2	11.386	4.5	2	2	2		1.316	1.244		0.939	0.909		0.628	0.76	0.721875	0.0117895	0.542187	0.0160636	0.751082	0.0767593
CSA000280.1	probable protein phosphatase 2C 76	3	3	41.491	9.1474	9.1	3	4	2	7.859	9.1	3	3	2	9.7929	9.1	3	4	2	1.176	1.135	1.214	1.035	1.034	1.061	0.718	0.776	0.639	0.887943	0.00575997	0.605106	0.000533894	0.68147	0.00122177
CSA000281.1	protein STRICTOSIDINE SYNTHASE-LIKE 3-like	3	3	43.864	135.58	43.6	13	22	13	187.66	48.2	16	24	16	191.77	45.1	15	24	15	1.111	1.125	1.145	1.012	1	0.992	0.78	0.866	0.801	0.888495	0.00039164	0.72375	0.000357075	0.814581	0.00219433
CSA000292.1	sec20 family protein	1	0	8.9996											2.3585	19.5	1	1	1
CSA000293.1	vesicle transporter Sec20, putative	3	2	9.8441	3.8349	14.6	1	1	1	5.4191	14.6	1	1	1	15.074	14.6	1	1	1	1.114		1.144	0.97		0.955	0.874		0.85	0.852524	0.00999346	0.763508	0.00513627	0.895584	0.0192555
CSA000299.1	mitochondrial import inner membrane translocase subunit Tim13	3	3	5.6455	27.758	69.2	3	4	3	26.852	55.8	2	3	2	29.081	50	2	2	2	0.996	0.999	0.994	1.019	1.015	0.945	0.986	0.986	1.068	0.996654	0.896556	1.01706	0.568192	1.02048	0.606153
CSA000300.1		1	0	10.288	7.513	19.1	1	1	1
CSA000305.1	kinesin-like calmodulin-binding protein	1	0	12.527											2.5126	9.2	1	1	1
CSA000306.1	LOW QUALITY PROTEIN: heat shock cognate 70 kDa protein 2-like	3	3	71.342	257.4	66.8	44	191	6	126.11	64.4	44	183	5	323.31	65.1	49	203	6	1.591	1.677	1.52	0.766	0.702	0.772	0.41	0.399	0.544	0.467836	7.393e-05	0.282581	6.12163e-05	0.604018	0.00462963
CSA000307.1	probable protein phosphatase 2C 23	1	1	78.747						1.2088	1	1	1	1							1.348			0.805			0.729		0.597181		0.540801		0.90559
CSA000309.1	nascent polypeptide-associated complex subunit alpha-like protein 2	3	3	24.736	203.53	48.2	8	13	7	114.87	41.6	7	12	6	203.45	47.8	7	13	6	1.433	1.422	1.308	0.791	0.752	0.948	0.613	0.606	0.76	0.598367	0.0015008	0.475378	0.000344143	0.79446	0.094367
CSA000313.1	flocculation protein FLO11 isoform X1	3	2	144.14	8.5356	2.8	3	3	3	7.5069	2.7	3	3	3	7.042	1.8	2	2	2	1.416	1.196		0.733	0.877		0.711	0.862		0.616386	0.0624764	0.602221	0.0600741	0.977019	0.875586
CSA000316.1	cysteine synthase	2	0	27.966	14.971	20	4	7	1	18.631	20.4	4	7	1
CSA000317.1	rubredoxin-like	3	3	21.403	30.959	29.2	3	3	3	58.037	29.2	3	3	3	46.784	19	2	2	2	0.633	0.683	0.634	0.981	1.009	0.957	1.528	1.429	1.553	1.51128	0.000118457	2.31282	3.24167e-05	1.53037	0.000215336
CSA000321.1	nucleobase-ascorbate transporter 6	3	3	57.667	25.295	7.5	4	5	3	28.697	7.5	4	4	3	35.341	6.2	3	5	2	1.382	1.24	1.289	0.96	0.93	0.895	0.515	0.743	0.714	0.712094	0.00119609	0.504219	0.00145858	0.708079	0.0216126
CSA000324.1	beta-galactosidase 9-like isoform X2	2	1	34.339						1.2776	5.2	2	2	1	1.5822	5.2	2	2	1		0.667			1.101			1.352		1.65067		2.02699		1.22797
CSA000327.1	DNA-directed RNA polymerase subunit beta, putative (DUF630 and DUF632)	1	1	28.584											2.9114	4.8	1	1	1			0.952			1.027			1.037	1.07878		1.08929		1.00974
CSA000332.1	endoglucanase 25-like	2	1	57.535	1.3182	6.3	3	3	1	8.6886	6.3	3	5	2							1.141			0.993			0.813		0.870289		0.712533		0.818731
CSA000340.1	cytochrome P450 CYP749A22-like	1	1	58.446						1.2706	3.1	1	1	1							1.314			0.821			0.76		0.62481		0.578387		0.9257
CSA000350.1		1	1	12.161	1.6753	6.7	1	1	1											0.796			0.917			1.373			1.15201		1.72487		1.49727
CSA000353.1	dihydroorotate dehydrogenase (quinone), mitochondrial	3	3	47.758	23.362	19.2	7	9	7	52.332	22.1	6	7	6	20.353	20.8	7	10	7	1.046	0.993	0.952	0.935	0.942	0.976	1.019	1.072	1.092	0.953862	0.200104	1.06419	0.140193	1.11567	0.0120022
CSA000357.1	ubiquitin-conjugating enzyme E2 7 isoform X1	3	3	16.447	3.7441	9.8	1	1	1	5.502	9.8	1	1	1	4.4493	9.8	1	1	1	1.012	1.057	1.092	0.976	1.008	0.996	1.009	0.913	0.877	0.94274	0.0730175	0.885479	0.0575414	0.939262	0.210415
CSA000363.1	protein TONNEAU 1a-like	3	3	33.986	48.208	24.7	6	7	6	38.465	11.5	3	3	3	3.7618	10.1	3	3	3	1.406	1.442	0.928	0.792	0.8	0.716	0.584	0.604	1.407	0.611229	0.0434155	0.687235	0.283009	1.12435	0.743139
CSA000367.1	feruloyl CoA ortho-hydroxylase 1-like	2	1	25.03	15.315	11.1	1	1	1						17.548	11.1	1	1	1			1.079			0.962			0.932	0.891566		0.863763		0.968815
CSA000378.1	geranylgeranyl transferase type-2 subunit alpha	3	1	9.8904	6.7957	15.7	1	1	1	6.3751	15.7	1	1	1	4.7093	15.7	1	1	1	0.914			1.121			0.989			1.22648		1.08206		0.882248
CSA000379.1	geranylgeranyl transferase type-2 subunit alpha 1	2	1	55.738	21.551	6.2	2	2	2	-2	1.6	1	1	1						0.875			1.018			1.153			1.16343		1.31771		1.13261
CSA000388.1	UPF0235 protein At5g63440	3	2	27.913	4.3746	11.9	3	3	3	3.8124	5.2	1	1	1	6.2796	5.2	1	2	1	1.097		1.104	0.998		1.081	0.869		0.769	0.944571	0.280608	0.744207	0.0302712	0.787879	0.0769513
CSA000389.1	SWI/SNF complex component SNF12 homolog	3	2	60.503	7.2538	9.9	4	5	4	8.4887	8.9	5	7	5	24.186	12.8	5	7	5		1.143	1.138		0.972	1.024		0.833	0.783	0.875055	0.0319943	0.708461	0.00566132	0.809619	0.0342007
CSA000390.1	serine/threonine-protein phosphatase 5 isoform X1	1	0	9.9039	5.6263	30.7	2	2	1
CSA000391.1	60S ribosomal protein L17-2	3	3	20.984	75.356	40.5	9	15	5	80.439	38.9	8	14	5	137.68	50.3	10	16	5	1.7	1.855	1.882	0.629	0.546	0.477	0.431	0.307	0.345	0.303844	6.13828e-05	0.199191	2.77279e-05	0.655569	0.0295523
CSA000394.1	SNF1-related protein kinase regulatory subunit gamma-1-like	2	2	22.933						1.5388	3.8	1	1	1	4.0371	12.5	3	3	3		0.958	0.914		1.075	1.072		0.977	1.041	1.1469	0.0247675	1.07799	0.200884	0.939916	0.18169
CSA000395.1	SNF1-related protein kinase regulatory subunit gamma-1-like	3	3	21.588	9.4291	6.8	1	2	1	13.345	19.9	3	4	3	28.448	28.8	4	4	4	1.056	1.029	0.999	1.038	1.037	1.106	0.881	0.889	0.866	1.03145	0.314739	0.854734	0.00110182	0.82867	0.00158446
CSA000396.1	SAP domain-containing protein	2	0	20.786	2.4543	4.9	1	1	1						1.4976	4.9	1	1	1
CSA000397.1	exocyst complex component EXO70B1	3	1	74.008	7.8003	8	5	5	5	1.7943	1.5	1	1	1	1.4928	1.4	1	1	1	0.979			1.059			0.966			1.08172		0.986721		0.912181
CSA000406.1	probable ADP-ribosylation factor GTPase-activating protein AGD14 isoform X1	3	3	78.111	25.711	10.6	8	9	8	59.18	10	7	8	7	45.403	12.2	11	14	11	1.347	1.149	1.211	0.971	0.967	1.028	0.595	0.82	0.776	0.800108	0.016089	0.591044	0.00501026	0.738705	0.0226083
CSA000407.1	elongation factor 1-delta-like	3	3	28.534	96.38	37.2	8	30	5	97.124	37.2	10	26	7	83.318	37.2	8	26	5	1.197	1.188	1.195	0.944	0.939	0.962	0.779	0.785	0.768	0.794693	5.23113e-06	0.651397	2.07754e-07	0.819684	3.73379e-05
CSA000408.1	F-box protein SKIP16	3	2	44.774	4.8969	5.9	2	2	2	2.0945	2.5	1	1	1	6.7138	8.8	3	3	3		1.037	1.19		0.982	1.009		0.968	0.727	0.894028	0.268097	0.761114	0.203396	0.851331	0.346621
CSA000415.1	heat shock cognate 70 kDa protein 2-like	3	3	64.553	31.143	43.5	28	103	1	39.363	44.4	28	102	1	37.204	44.7	31	107	1	1.353	1.222	1.185	0.981	1.028	1.023	0.531	0.663	0.72	0.806383	0.0102605	0.509043	0.00124592	0.631266	0.00300182
CSA000418.1	1,4-dihydroxy-2-naphthoyl-CoA thioesterase 1-like	1	0	17.698	3.6318	11.1	1	1	1
CSA000419.1	glucomannan 4-beta-mannosyltransferase 9	3	3	61.263	8.5635	5.8	3	3	1	5.8904	5.8	3	3	1	3.4274	3.8	2	2	1	1.681	1.685	1.555	0.68	0.664	0.733	0.402	0.416	0.52	0.422069	3.72027e-05	0.271896	2.9881e-05	0.644198	0.00446727
CSA000421.1	FAD-dependent urate hydroxylase-like	1	1	14.78						4.3242	8.7	1	2	1							1.184			0.89			0.864		0.751689		0.72973		0.970787
CSA000427.1	nuclear transcription factor Y subunit B-1 isoform X1	1	1	17.555	15.385	13	1	1	1											1.4			1.013			0.432			0.723571		0.308571		0.426456
CSA000431.1	callose synthase 9 isoform X1	2	1	7.3672	1.9849	21.2	2	2	2	1.6264	21.2	2	2	2						1.111			1.061			0.779			0.954995		0.70117		0.734213
CSA000432.1	callose synthase 9 isoform X1	2	1	9.0581	3.2461	11.7	1	1	1						2.331	11.7	1	1	1	1.123			1.111			0.71			0.989314		0.632235		0.639064
CSA000435.1		3	0	34.839	2.2163	2.3	1	1	1	1.3823	2.3	1	1	1	1.9067	2.3	1	1	1
CSA000439.1	Callose synthase 9	3	2	23.547	10.754	23.5	3	3	3	9.0576	11.5	2	2	2	9.3031	17.5	3	3	3		1.079	1.085		1.03	1.003		0.859	0.88	0.939464	0.0418025	0.803604	0.00263042	0.855386	0.0132672
CSA000440.1	callose synthase 9	2	2	22.468						1.9059	11.9	3	3	3	2.4679	8.3	2	2	2		1.265	1.048		0.948	0.992		0.689	0.943	0.838738	0.234102	0.705577	0.178367	0.841237	0.354637
CSA000441.1	callose synthase 9-like	2	2	19.006	26.728	23.2	2	3	2	9.9546	9.1	1	2	1						1.17	1.163		0.988	1.074		0.778	0.695		0.883841	0.0881724	0.631376	0.00925078	0.714355	0.0387961
CSA000442.1	callose synthase 9-like, partial	3	3	54.086	47.19	20.9	7	9	3	63.603	20.9	7	9	6	75.853	25.1	8	10	4	1.019	1.11	1.024	1.059	1.011	0.993	0.91	0.826	0.968	0.971456	0.44567	0.857596	0.0419086	0.882795	0.0588369
CSA000444.1	probable plastid-lipid-associated protein 12, chloroplastic	3	3	7.9301	5.0941	15.7	2	3	2	4.8458	57.1	2	3	2	4.1142	15.7	2	4	2	0.533	0.543	0.612	1.052	1.018	1.002	1.591	1.612	1.534	1.81991	8.98001e-05	2.80628	7.50779e-06	1.54199	3.59645e-05
CSA000445.1	probable plastid-lipid-associated protein 12, chloroplastic	1	0	6.3263	3.3052	17.5	1	1	1
CSA000446.1	probable plastid-lipid-associated protein 12, chloroplastic isoform X2	3	3	7.8067	1.8295	13.2	1	2	1	1.6716	13.2	1	2	1	1.9335	13.2	1	2	1	0.669	0.539	0.616	1.012	1.007	1.071	1.445	1.63	1.454	1.69408	0.000602888	2.483	0.000222312	1.4657	0.00165883
CSA000457.1	DExH-box ATP-dependent RNA helicase DExH10	3	3	125.42	50.625	15.5	11	13	11	52.852	13.4	10	12	10	45.239	17.6	12	15	12	1.194	1.225	1.313	0.999	0.995	0.931	0.71	0.666	0.574	0.783762	0.00302588	0.522508	0.000377786	0.666667	0.00206989
CSA000462.1	mannose-P-dolichol utilization defect 1 protein homolog 2	3	1	34.435	3.0486	3	1	1	1	2.1543	3	1	1	1	2.3311	3	1	1	1		1.023			1.05			0.914		1.02639		0.893451		0.870476
CSA000467.1	protein disulfide isomerase-like 5-4	3	3	8.7632	8.2725	14.5	1	2	1	21.408	14.5	1	2	1	13.962	27.6	2	3	2	1.374	1.309	1.17	1.043	1.037	1.087	0.436	0.533	0.672	0.821957	0.0212702	0.425902	0.00126979	0.518156	0.00193339
CSA000475.1	probable carboxylesterase 15	2	0	25.91	5.1777	6.8	1	1	1						4.7753	6.8	1	1	1
CSA000480.1	50S ribosomal protein L12, chloroplastic	3	3	19.234	93.672	41.8	10	22	10	152.02	40.8	9	23	9	113.33	40.8	9	21	9	0.569	0.568	0.607	1.132	1.166	1.151	1.406	1.394	1.379	1.97764	3.91314e-06	2.39622	7.0309e-07	1.21166	4.18563e-05
CSA000484.1	1,4-alpha-glucan-branching enzyme 1, chloroplastic/amyloplastic-like isoform X1	3	3	59.993	32.646	17.9	7	9	6	76.729	21.1	9	13	8	40.726	19.6	8	9	7	0.887	0.925	0.881	1.093	1.059	1.127	1.006	1.001	0.988	1.2176	0.00123629	1.11214	0.00243071	0.913388	0.00964711
CSA000488.1	1,4-alpha-glucan-branching enzyme 1, chloroplastic/amyloplastic isoform X2	3	3	28.22	12.077	18.7	5	8	5	13.43	22.8	7	12	7	13.709	22.8	7	12	7	0.833	0.859	0.872	1.116	1.103	1.127	1.08	1.094	0.982	1.30499	4.11713e-05	1.23089	0.00598138	0.943216	0.152552
CSA000490.1	1,4-alpha-glucan-branching enzyme 2-2, chloroplastic/amyloplastic isoform X1	3	2	16.015	36.09	24.8	2	2	2	27.92	24.8	2	2	2	7.5842	10.9	1	1	1		0.79	0.806		1.208	1.205		1.066	1.047	1.5119	0.000396774	1.32393	0.0023004	0.875673	0.00408593
CSA000501.1	Caffeoyl-CoA O-methyltransferase	3	3	27.553	68.904	45.7	8	10	8	29.272	27.3	6	8	6	47.508	35.5	7	11	7	0.914	0.913	0.949	1.041	1.079	1.011	1.034	1.009	1.042	1.12788	0.00672772	1.11131	0.00263425	0.985308	0.524969
CSA000513.1	methionine S-methyltransferase isoform X1	3	3	112.68	23.681	9	8	9	4	16.181	6.1	5	5	3	6.6728	6.2	6	6	2	1.247	1.294	1.23	0.937	0.881	0.969	0.726	0.722	0.716	0.739061	0.000514278	0.573853	1.01472e-05	0.776462	0.00130878
CSA000519.1	Cytochrome P450 87A3	3	3	59.815	15.595	15.7	6	7	6	11.737	10.2	4	5	4	14.31	11.5	5	5	5	1.838	1.662	1.898	0.402	0.645	0.448	0.484	0.468	0.411	0.276954	0.000224523	0.252501	5.44698e-05	0.911706	0.601684
CSA000525.1	OBERON-like protein	1	0	17.854											2.331	16.1	2	2	2
CSA000527.1	OBERON-like protein	2	0	25.56	1.9918	4.5	1	1	1						1.9754	4.5	1	1	1
CSA000531.1	20 kDa chaperonin, chloroplastic-like	3	3	26.32	96.549	54.8	13	37	13	125.76	61.2	16	40	16	136.94	57.6	13	45	13	0.849	0.849	0.85	1.095	1.074	1.087	1.113	1.08	1.099	1.27786	2.71583e-06	1.29199	1.31649e-05	1.01106	0.350123
CSA000532.1	auxin response factor 19	2	0	121.69	1.6823	1.5	1	1	1	14.378	2.9	2	2	2
CSA000536.1	probable uridine nucleosidase 2 isoform X2	3	3	21.157	16.53	12.8	2	3	2	15.406	12.8	2	3	2	15.096	12.8	2	2	2	1.087	1.164	1.036	1.033	1.073	1.089	0.844	0.694	0.854	0.972011	0.493689	0.727715	0.00944075	0.74867	0.0079074
CSA000542.1	universal stress protein PHOS32	3	3	30	99.069	33	7	12	4	40.923	33	7	12	4	50.583	33	7	12	4	1.325	1.309	1.325	0.941	0.955	0.95	0.642	0.658	0.667	0.718868	6.46262e-07	0.496843	2.06724e-07	0.691145	3.99269e-06
CSA000547.1	FAM10 family protein At4g22670-like	3	3	45.188	210.93	39.6	18	32	11	275.48	39.6	17	35	11	232.9	37.9	18	31	12	1.545	1.66	1.643	0.711	0.665	0.688	0.493	0.449	0.447	0.425743	1.70674e-05	0.28651	7.67919e-06	0.672965	0.000358528
CSA000562.1	protein FAR1-RELATED SEQUENCE 2-like isoform X1	3	2	20.351	4.8521	10.9	2	3	2	3.2484	6.5	1	1	1	11.65	10.9	2	2	2		1.144	1.17		0.959	0.946		0.846	0.824	0.82325	0.00501343	0.721694	0.00278528	0.87664	0.0116187
CSA000567.1		3	3	14.912	5.8451	10	1	1	1	6.6716	10	1	2	1	3.6914	10	1	1	1	1.813	1.695	1.789	0.615	0.697	0.627	0.289	0.366	0.311	0.366056	1.43876e-05	0.182367	4.55273e-06	0.498195	0.000699532
CSA000570.1	histone chaperone ASF1B	1	0	18.894	2.5973	7.3	1	1	1
CSA000590.1	LOW QUALITY PROTEIN: alkaline/neutral invertase CINV2	3	3	63.531	78.59	32.4	14	20	7	119.29	28.4	14	17	6	88.515	30.8	13	17	6	1.024	1.07	0.996	1.177	1.202	1.2	0.758	0.764	0.798	1.15825	0.00209789	0.750809	0.00050037	0.648226	9.23812e-06
CSA000595.1	coiled-coil domain-containing protein 94 homolog	2	2	20.287	5.3497	13	2	2	2	5.124	17.5	3	4	3						1.339	1.447		0.901	0.773		0.637	0.626		0.600861	0.0219389	0.453338	0.00504238	0.75448	0.0853808
CSA000602.1	probable pyridoxal 5'-phosphate synthase subunit PDX1	3	3	38.441	161.89	59.2	16	32	16	138.47	57	14	29	2	3.4782	57	14	28	2	0.764	0.881	0.892	1.2	1.076	1.09	1.129	1.083	1.053	1.32676	0.00819784	1.28695	0.0064528	0.969994	0.496037
CSA000605.1	calcium-dependent protein kinase 2-like	3	3	59.198	71.568	27.9	14	16	10	60.377	21.5	10	16	8	68.602	24.7	12	15	9	1.106	1.134	1.096	0.939	0.936	0.937	0.866	0.861	0.876	0.842926	0.000106094	0.780276	3.66535e-05	0.925676	0.000101331
CSA000608.1	ethylene-responsive transcription factor ERF021-like	3	3	59.397	29.773	9.9	3	3	3	40.043	8.4	2	2	2	40.151	9.9	3	5	3	1.465	1.41	1.423	0.719	0.794	0.821	0.66	0.655	0.642	0.543043	4.66636e-05	0.455328	1.49268e-06	0.838475	0.015395
CSA000616.1	protein QUIRKY	3	3	116.17	24.209	6.4	6	8	6	35.155	8.7	7	8	7	17.383	7.6	7	7	7	1.098	1.05	1.041	0.945	1.014	0.966	0.919	0.975	1.038	0.917215	0.0311682	0.91941	0.0910151	1.00239	0.95626
CSA000619.1	chorismate mutase 2	3	3	29.037	224.22	58.6	13	25	13	289.04	54.3	11	27	11	204.09	58.2	12	26	12	0.905	0.917	0.919	1.26	1.273	1.29	0.814	0.836	0.819	1.39475	3.155e-06	0.900766	0.000339724	0.645828	2.0664e-06
CSA000627.1	oxygen-evolving enhancer protein 1, chloroplastic	3	3	35.011	323.31	54.5	21	100	10	323.31	54.5	20	98	9	323.31	54.5	21	88	10	0.53	0.527	0.561	0.72	0.717	0.702	1.954	1.968	1.902	1.322	0.000141947	3.59951	4.21151e-07	2.72277	4.95742e-07
CSA000630.1	conserved oligomeric Golgi complex subunit 4	3	3	84.278	36.743	19	11	13	11	55.108	14.6	9	10	9	36.516	15.3	10	12	10	1.047	1.057	1.048	1.112	1.097	1.082	0.88	0.814	0.897	1.0441	0.00737352	0.822018	0.00184392	0.787299	0.000952059
CSA000631.1	pyruvate dehydrogenase E1 component subunit alpha-3, chloroplastic isoform X1	3	3	10.491	68.211	58.9	5	8	4	63.08	80	10	13	8	36.956	52.6	5	8	4	0.925	0.925	0.977	1.123	1.161	1.154	0.991	0.903	0.865	1.21613	0.000621018	0.975946	0.611024	0.802501	0.00442617
CSA000632.1	pyruvate dehydrogenase E1 component subunit alpha-3, chloroplastic-like	3	3	38.633	38.924	34.1	9	14	6	30.436	29	9	14	4	17.765	29.8	9	13	4	1.031	0.969	1.008	1.147	1.181	1.135	0.817	0.848	0.797	1.15126	0.00262721	0.818484	0.00147338	0.710944	7.93683e-05
CSA000643.1	late embryogenesis abundant protein Dc3	3	0	16.462	2.6897	5.8	1	1	1	1.7682	5.8	1	1	1	2.5194	5.8	1	1	1
CSA000649.1	stachyose synthase-like	3	3	95.23	323.31	28.4	18	28	18	283.33	31.2	18	25	18	262.12	31.4	19	29	19	0.443	0.443	0.477	0.874	0.871	0.905	1.8	1.826	1.858	1.94424	1.06729e-05	4.02348	2.82549e-07	2.06943	1.19855e-06
CSA000651.1	beta-galactosidase 17	3	0	91.424	3.1474	2.1	1	1	1	5.9647	3.5	2	2	2	3.622	3.5	2	2	2
CSA000652.1		2	2	12.733	2.1139	7.4	1	3	1	1.2984	7.4	1	2	1						1.554	1.592		0.71	0.676		0.546	0.531		0.440559	0.000838304	0.342339	0.000389656	0.777056	0.0141572
CSA000654.1	putative 12-oxophytodienoate reductase 11	3	3	38.323	40.543	24.6	6	12	1	82.376	37.7	10	14	4	64.95	42.6	11	15	4	0.828	0.848	0.884	1.08	0.981	0.955	1.152	1.154	1.125	1.17813	0.0214555	1.34023	0.000104008	1.1376	0.0242773
CSA000656.1	putative methylesterase 14, chloroplastic	3	2	38.821	7.8579	8.4	3	3	3	3.8342	2.9	1	1	1	5.2812	6.3	2	2	2	1.001	0.787		0.991	1.061		1.008	1.23		1.14765	0.361745	1.25168	0.281868	1.09064	0.508074
CSA000657.1	thioredoxin H-type	3	3	19.898	66.853	38.1	7	23	6	88.95	38.1	7	28	6	78.799	38.1	7	25	6	0.998	1.027	1.014	0.993	1.01	1.023	0.966	0.936	0.935	0.995722	0.737811	0.933531	0.00694484	0.937541	0.00923761
CSA000658.1	Sulfite exporter TauE/SafE family protein	2	0	72.947						1.8976	1.2	1	1	1	2.5757	1.2	1	1	1
CSA000659.1	multicystatin-like	1	0	13.476	1.3535	6.8	1	1	1
CSA000660.1	glutaredoxin-like	3	3	11.449	70.786	59.3	4	8	4	75.615	59.3	4	8	4	88.279	59.3	4	10	4	1.082	1.147	1.137	1.032	1.036	0.971	0.845	0.732	0.847	0.902852	0.02017	0.720143	0.00187712	0.797631	0.00917422
CSA000661.1	tRNA (adenine(58)-N(1))-methyltransferase catalytic subunit TRMT61A-like	3	3	34.503	12.735	11.9	3	3	3	9.063	11.9	3	3	3	6.2475	5.4	2	2	2	1.146	1.155	1.165	1.069	1.011	1.034	0.723	0.773	0.734	0.898442	0.00270494	0.643393	1.39581e-05	0.716121	0.000202554
CSA000663.1	zinc finger CCCH domain-containing protein 32 isoform X1	2	2	54.072	1.4279	3	2	2	1						2.9061	2.2	1	2	1	0.803		1.044	0.883		1.033	1.399		0.904	1.03736	0.830607	1.24689	0.494626	1.20198	0.532348
CSA000673.1	50S ribosomal protein L19-2, chloroplastic	3	2	15.119	4.5141	25	4	5	4	3.5358	18.9	3	3	3	2.4056	11.4	2	3	2	0.865		1.001	1.06		0.881	1.122		1.127	1.04019	0.770395	1.20525	0.106473	1.15868	0.227573
CSA000674.1	50S ribosomal protein L19, chloroplastic-like	2	2	13.66						2.3815	8.9	1	1	1	2.7862	8.9	1	1	1		1.49	1.499		0.688	0.664		0.658	0.673	0.452325	0.00024508	0.445299	0.000111296	0.984467	0.535394
CSA000678.1	peptidyl-prolyl cis-trans isomerase CYP21-4-like isoform X3	3	1	18.949	2.0834	5.8	1	1	1	1.7682	10.5	2	2	2	2.9625	13.5	2	2	2	1.005			1.038			0.953			1.03284		0.948259		0.918112
CSA000683.1	tubulin alpha-3 chain	2	2	49.768	26.023	43.4	18	42	2						27.326	47	19	45	2	1.075		0.98	0.921		1.011	0.982		1.015	0.940146	0.446479	0.971776	0.622388	1.03364	0.567655
CSA000689.1	sister-chromatid cohesion protein 3 isoform X1	1	0	174.61	1.7111	1.6	2	3	1
CSA000697.1	E3 ubiquitin-protein ligase UPL3	3	3	213.43	65.706	6.3	10	12	3	63.571	5.4	9	12	3	61.978	5.7	10	10	8	1.324	1.2	1.217	1.089	1.086	1.005	0.455	0.574	0.768	0.85004	0.0170933	0.480353	0.00282991	0.565094	0.00840848
CSA000709.1	probable inactive ATP-dependent zinc metalloprotease FTSHI 2, chloroplastic	3	0	77.267	-2	7.3	4	11	1	1.2926	7.3	4	9	1	1.5998	7.3	4	10	0
CSA000724.1	probable LRR receptor-like serine/threonine-protein kinase IRK	2	2	101.91						1.4402	1.6	1	1	1	1.4295	1.6	1	1	1		1.149	1.186		1.055	1.096		0.734	0.639	0.921199	0.0794936	0.588009	0.0110456	0.638308	0.0172317
CSA000736.1	protein NLP7 isoform X1	1	1	107.64	3.7316	0.9	1	1	1											1.041			0.977			0.969			0.938521		0.930836		0.991812
CSA000738.1	nephrocystin-3	3	3	66.634	50.01	16.2	8	9	8	43.851	19.2	8	9	8	68.445	20.2	9	9	9	1.216	1.218	1.373	0.995	0.982	0.945	0.709	0.718	0.535	0.767533	0.00550235	0.515366	0.00147298	0.671458	0.00646818
CSA000740.1	lactation elevated protein 1 isoform X2	2	0	25.95	3.2356	12.2	2	2	2						3.6079	5	1	1	1
CSA000744.1	lysophospholipid acyltransferase LPEAT1 isoform X1	2	2	41.608						6.0322	5.8	2	2	2	3.104	5.8	2	2	2		1.133	1.077		1.004	1.015		0.812	0.878	0.913575	0.0788627	0.764706	0.0266063	0.837048	0.0389602
CSA000748.1	arabinosyltransferase RRA3	3	3	49.079	19.262	5.8	2	2	2	28.348	10.7	4	5	4	13.366	5.8	2	3	2	1.291	1.068	1.396	0.964	0.999	0.849	0.636	0.803	0.616	0.748868	0.0422471	0.54727	0.00751314	0.730797	0.0277369
CSA000749.1	probable protein phosphatase 2C 55	3	2	55.79	9.341	5.5	2	2	2	3.6691	4.8	2	2	1	5.5013	5	2	2	1		0.903	0.994		1.021	0.971		1.111	1.04	1.05008	0.456806	1.1339	0.158737	1.07982	0.208583
CSA000756.1	N-alpha-acetyltransferase 11-like	3	3	51.475	41.71	14	5	6	5	31.368	14	5	5	5	37.852	14	5	5	5	1.311	1.25	1.301	1.008	0.987	0.976	0.561	0.668	0.609	0.769291	0.000147627	0.475919	4.90702e-05	0.618647	0.000307241
CSA000757.1	UDP-galactose transporter 2-like	1	1	35.876											1.5299	2.8	1	1	1			1.322			0.866			0.699	0.655068		0.528744		0.807159
CSA000761.1	exocyst complex component SEC8	3	3	120	76.513	11	10	13	10	179.25	17.1	15	17	15	103.25	15.8	15	20	15	1.12	1.133	1.115	1.099	1.118	1.083	0.692	0.706	0.758	0.97981	0.118862	0.640143	4.12807e-05	0.653333	7.08405e-05
CSA000762.1	DUF21 domain-containing protein At2g14520	1	0	52.381	6.8865	3.4	1	1	1
CSA000763.1	protein trichome birefringence-like 13 isoform X2	2	0	22.576	6.7489	8.1	1	1	1						8.6914	8.1	1	1	1
CSA000765.1	transmembrane protein	3	3	28.29	16.115	19.2	3	4	3	11.252	15.2	3	4	3	13.445	18.4	3	4	3	1.174	1.319	1.105	1.046	0.999	1.103	0.71	0.669	0.743	0.874931	0.0983067	0.589772	0.00178974	0.674079	0.000754316
CSA000770.1	protein FAR-RED ELONGATED HYPOCOTYL 3-like	1	1	40.748											1.7893	3.1	1	1	1			1.04			1.12			0.816	1.07692		0.784615		0.728571
CSA000773.1	vinorine synthase-like	3	3	49.003	17.478	19	7	10	7	16.339	16.5	6	9	5	21.405	19	7	7	7	1.278	1.511	1.506	0.881	0.721	0.774	0.758	0.594	0.544	0.553201	0.00207992	0.441444	0.00134694	0.79798	0.115944
CSA000783.1	protein root UVB sensitive 1, chloroplastic	3	3	70.216	36.908	11.6	5	6	5	26.023	14	6	6	6	55.337	11.6	5	5	5	0.843	0.87	0.873	1.238	1.143	1.143	0.96	1.038	1.006	1.36272	0.000698175	1.16164	0.0047662	0.85244	0.0112215
CSA000789.1		2	2	13.279	23.784	16.8	1	1	1	8.7443	16.8	1	1	1						1.284	1.197		1.022	1.016		0.583	0.71		0.821443	0.0366355	0.521161	0.0163797	0.634446	0.0279112
CSA000790.1	methyl-CpG-binding domain-containing protein 11	3	3	84.446	122.57	31.4	13	20	10	94.365	28	9	16	7	110.88	27.2	10	15	7	1.119	1.148	1.099	1.092	1.129	1.134	0.78	0.678	0.744	0.996732	0.859553	0.654189	0.000302249	0.656334	0.000298793
CSA000791.1	blue-light photoreceptor PHR2	3	3	49.714	14.755	16.4	6	9	6	22.715	17.1	6	7	6	23.185	23	8	10	8	1.705	1.231	1.407	0.514	0.694	0.635	0.548	0.86	0.71	0.424361	0.00491035	0.487681	0.0108834	1.14921	0.429957
CSA000793.1	U1 small nuclear ribonucleoprotein A isoform X2	3	3	28.594	17.401	19.7	4	6	3	18.309	19.7	4	5	3	11.352	20.5	5	9	2	0.974	1.023	1.102	1.02	0.99	1.024	1.087	0.979	0.737	0.979025	0.606339	0.904485	0.420396	0.923863	0.500286
CSA000794.1	secretory carrier-associated membrane protein 4-like isoform X1	2	1	29.094	2.8989	4.7	1	1	1						3.1078	4.7	1	1	1	1.55			0.772			0.485			0.498065		0.312903		0.628238
CSA000795.1	phosphoribulokinase, chloroplastic-like	3	3	44.807	323.31	64.2	21	75	13	323.31	64.4	22	77	14	323.31	60	20	75	12	0.492	0.498	0.477	0.89	0.908	0.906	1.758	1.78	1.811	1.84322	1.05652e-06	3.64622	1.62053e-07	1.97818	7.15682e-07
CSA000797.1	plastidal glycolate/glycerate translocator 1, chloroplastic-like	3	3	51.034	4.897	5.7	3	4	3	4.8562	5.9	3	4	3	2.0855	2.3	1	2	1	0.528	0.521	0.465	0.888	1.006	0.917	1.775	1.656	1.829	1.85667	0.000445324	3.47424	2.20603e-05	1.87122	0.000194924
CSA000800.1	cytochrome b5 isoform E-like	3	3	17.445	60.01	27.2	3	9	3	86.787	27.2	3	8	3	55.379	27.2	3	7	3	1.034	0.992	1.019	1.044	1.074	1.083	0.843	0.857	0.893	1.05123	0.0378967	0.85156	0.00145503	0.810059	0.000437007
CSA000810.1	plant/F25P12-18 protein	2	0	16.805	4.1963	9.5	1	1	1	5.0515	9.5	1	1	1
CSA000813.1	protein ABHD17B	2	0	23.901						2.6469	3.7	1	1	1	2.1164	3.7	1	1	1
CSA000821.1	selT-like protein isoform X4	3	3	25.471	3.3188	7.8	2	2	2	5.5227	11.7	3	3	3	5.047	11.7	3	3	3	1.062	1.059	1.077	0.941	0.966	0.947	0.978	1.002	0.956	0.892433	0.000255909	0.918074	0.00373527	1.02873	0.147983
CSA000827.1	chaperonin-like RbcX protein 2, chloroplastic	3	0	11.685	2.202	10.7	1	1	1	5.7017	10.7	1	1	1	2.2272	10.7	1	1	1
CSA000830.1	calcium-dependent protein kinase 13	3	3	30.046	2.9693	3.4	1	1	1	9.1096	9.3	2	2	2	2.0665	3.4	1	1	1	1.057	1.072	1.136	1.104	1.044	1.152	0.809	0.853	0.648	1.01072	0.782587	0.707504	0.0088934	0.7	0.00907419
CSA000831.1	calcium-dependent protein kinase 13 isoform X1	1	1	35.157	6.6612	11.1	3	3	2											1.897			0.406			0.399			0.214022		0.210332		0.982759
CSA000834.1	ubiquitin-protein ligase, putative	1	0	61.825											2.6919	1.8	1	1	1
CSA000836.1	ribosomal RNA large subunit methyltransferase E isoform X1	3	3	24.979	1.6938	5.2	1	2	1	1.6406	5.2	1	2	1	2.1196	5.2	1	2	1	0.403	0.359	0.378	0.618	0.626	0.699	2.239	2.29	2.185	1.70439	0.000740492	5.88947	5.87464e-07	3.45548	2.34105e-06
CSA000838.1	protein mago nashi homolog	3	3	18.493	29.476	41.8	7	8	7	52.277	45.6	8	9	8	38.264	45.6	8	8	8	1.133	1.139	1.157	0.957	0.984	0.998	0.851	0.813	0.785	0.857101	0.000310988	0.714202	8.96131e-05	0.833277	0.00194296
CSA000839.1	hydroquinone glucosyltransferase-like	3	1	54.986	3.5861	3.4	2	2	2	2.0674	3.4	2	2	2	3.3705	3.4	2	2	2		1.253			1.043			0.603		0.832402		0.481245		0.57814
CSA000841.1	protein RETICULATA-RELATED 1, chloroplastic	3	3	17.754	23.242	17.2	2	3	2	32.326	25.2	3	5	3	23.731	25.2	3	3	3	0.917	0.92	0.927	1.15	1.063	1.13	0.953	1.057	0.961	1.20948	0.00188198	1.07489	0.108825	0.888723	0.043426
CSA000842.1	protein RETICULATA-RELATED 1, chloroplastic-like	2	2	15.114						2.4871	7.4	1	2	1	2.6851	7.4	1	2	1		0.915	0.976		1.088	1.08		1.022	0.947	1.14648	0.0459557	1.04125	0.50446	0.90821	0.118632
CSA000845.1	60S ribosomal protein L13a-4	3	3	23.643	7.8407	33.5	7	10	3	8.3602	46.6	10	16	4	10.496	46.6	10	18	4	1.599	1.551	1.572	0.795	0.819	0.804	0.392	0.442	0.42	0.512071	1.00728e-06	0.265565	5.42776e-07	0.51861	1.74676e-05
CSA000846.1	chromatin modification-related protein EAF1 B-like isoform X1	1	1	60.968	1.3479	3	1	1	1											1.09			0.761			1.133			0.698165		1.03945		1.48883
CSA000849.1	dentin sialophosphoprotein	3	3	103.1	11.636	7.1	5	5	5	7.8926	6.5	4	4	4	27.242	5.2	4	5	4	0.547	0.849	0.876	1.544	1.299	1.236	1.04	0.885	0.916	1.79533	0.013003	1.25044	0.176197	0.696494	0.0172106
CSA000855.1	aldose 1-epimerase-like	3	2	39.456	2.6145	4.2	2	2	2	2.5258	4.2	2	2	2	2.8595	4.2	2	2	2	0.592		0.532	1.434		1.506	1.097		1.101	2.61566	0.00265295	1.95552	0.00312021	0.747619	0.00931312
CSA000858.1	exocyst complex component EXO84B	3	3	85.666	16.126	8.2	5	7	5	20.324	5.4	3	3	3	13.818	6.7	4	5	4	0.987	0.946	0.898	1.068	1.115	1.032	0.944	0.951	1.107	1.13564	0.0220311	1.0604	0.389392	0.933748	0.290779
CSA000860.1	probable glutathione S-transferase	3	3	26.223	109.66	23.3	4	9	4	25.939	25.1	5	8	5	91.321	32.6	6	9	6	0.379	0.485	0.413	0.863	0.889	0.876	2.06	1.824	2.016	2.05795	0.000150462	4.6202	4.05356e-05	2.24505	0.000115912
CSA000861.1	probable alpha-amylase 2	1	0	45	-2	11.7	4	6	1
CSA000864.1	Serine/threonine-protein kinase	2	0	110.2	3.1405	2	2	2	2						4.4641	3.5	3	3	3
CSA000866.1	autophagy-related protein 101-like isoform X2	2	2	46.931	12.451	9.7	2	2	2	8.3403	9.7	2	2	2						1.019	1.027		1.109	1.062		0.856	0.896		1.06109	0.119871	0.856305	0.0187126	0.807001	0.0210147
CSA000870.1	U5 small nuclear ribonucleoprotein 40 kDa protein	3	3	39.294	38.656	20.8	7	9	7	17.387	16.9	5	8	5	46.969	26.8	9	11	9	1.217	1.076	1.145	0.881	0.976	0.998	0.73	0.795	0.807	0.830425	0.0231567	0.678301	0.00145153	0.816813	0.0155874
CSA000873.1	cysteine synthase, chloroplastic/chromoplastic-like	3	3	12.154	19.384	11.6	1	4	1	24.238	17.9	2	5	1	22.485	11.6	1	4	1	0.698	0.763	0.741	1.169	1.071	1.087	1.244	1.211	1.285	1.5109	0.000472352	1.69846	5.75464e-05	1.12414	0.0207153
CSA000882.1	guanine nucleotide exchange factor SPIKE 1	3	3	248.25	39.725	7.7	14	17	14	56.638	6.9	12	14	12	28.768	5.5	10	11	10	1.158	1.136	1.129	0.973	1	0.969	0.81	0.843	0.795	0.85948	0.000254438	0.715162	4.06498e-05	0.832087	0.000664843
CSA000897.1	probable tRNA N6-adenosine threonylcarbamoyltransferase	1	0	15.82											3.1151	44.6	5	7	0
CSA000903.1	Mitogen-activated protein kinase kinase kinase A	1	0	239.54											2.1197	0.7	1	1	1
CSA000910.1	DNA repair helicase UVH6 isoform X2	3	3	90.469	5.2528	3	3	3	3	8.015	6.8	5	5	5	4.2444	4.3	4	4	4	1.096	1.032	1.096	1.014	1.023	1.017	0.852	0.931	0.849	0.94727	0.0578185	0.816377	0.00452216	0.861821	0.00645281
CSA000915.1	ribose-phosphate pyrophosphokinase 4-like	3	2	32.668	74.378	8.1	1	1	1	13.984	11.9	2	2	2	18.928	17.6	3	3	3	0.979		1.026	1.064		1.042	0.96		0.918	1.05037	0.191016	0.936658	0.181496	0.891738	0.040627
CSA000917.1	AP-1 complex subunit mu-2	3	3	82.897	29.384	9.7	6	7	2	12.231	10.7	7	8	2	20.504	9	6	8	2	1.049	1.097	0.962	0.937	0.961	1.009	1	0.908	1.042	0.935328	0.20928	0.949163	0.399592	1.01479	0.765405
CSA000918.1	glutamate--glyoxylate aminotransferase 2	3	3	53.544	235.95	63.2	23	59	14	294.42	65.5	25	62	16	279.91	58.4	23	64	14	0.562	0.552	0.512	1.018	1.005	1.003	1.532	1.638	1.631	1.86101	8.19084e-06	2.95264	9.35953e-06	1.58658	6.819e-05
CSA000919.1	anthranilate phosphoribosyltransferase	1	0	65.388											6.0759	5.1	3	3	3
CSA000930.1	mitochondrial import inner membrane translocase subunit TIM22-4-like isoform X1	1	1	18.136											2.7437	11.6	1	1	1			0.912			0.96			1.165	1.05263		1.27741		1.21354
CSA000931.1	cinnamoyl-CoA reductase 1	3	3	36.035	53.214	32.2	9	15	6	38.584	23.1	7	13	4	57.279	20.7	7	11	4	0.979	0.944	0.898	0.989	0.949	0.951	1.075	1.145	1.179	1.0241	0.44566	1.20489	0.00751388	1.17653	0.00693305
CSA000935.1	transcription initiation factor TFIID subunit 15b	3	3	38.458	106.08	25.8	8	12	8	118.49	18.6	6	8	6	144.23	22.6	7	10	7	1.332	1.333	1.379	0.855	0.869	0.905	0.676	0.664	0.628	0.650099	2.55337e-05	0.486647	5.22665e-06	0.748574	0.000443723
CSA000936.1	glucan endo-1,3-beta-glucosidase 9	3	2	53.388	2.1419	2.3	1	1	1	1.8131	2.3	1	1	1	2.3132	2.3	1	1	1	1.298		1.38	0.825		0.776	0.776		0.716	0.597834	0.00777523	0.557132	0.00725987	0.931918	0.294687
CSA000941.1	glycerol-3-phosphate 2-O-acyltransferase 6	2	2	55.107						4.3446	4.4	2	2	2	5.3298	4.4	2	2	2		0.924	0.889		1.413	1.474		0.659	0.641	1.59239	0.00426053	0.717044	0.00583449	0.450294	0.00160221
CSA000943.1	protein WHI4 isoform X1	3	3	31.182	8.7071	11.9	3	5	3	8.1997	21	4	5	4	6.9527	7.7	2	3	2	1.482	1.356	1.32	0.74	0.788	0.813	0.612	0.737	0.759	0.563011	0.000349052	0.506975	0.000524853	0.90047	0.199163
CSA000948.1	ABC transporter C family member 8-like	3	2	163.29	7.3471	3.2	5	5	5	6.0932	2.3	3	3	3	2.6493	1.1	2	2	2	0.815		0.837	0.906		0.914	1.358		1.319	1.10169	0.0188683	1.62046	0.00190294	1.47088	0.00215112
CSA000949.1	putative serine/threonine-protein kinase	2	0	63.198	2.7885	3.3	2	2	2	3.776	3.3	2	2	2
CSA000963.1	heat shock cognate 70 kDa protein 2-like	3	3	71.474	323.31	66.8	44	170	13	323.31	66.6	44	164	13	236.6	62.5	44	172	12	0.688	0.703	0.665	0.871	0.879	0.838	1.51	1.507	1.621	1.25875	0.000447318	2.25584	2.52195e-05	1.79212	6.58723e-05
CSA000964.1	inner membrane protein PPF-1, chloroplastic-like	3	3	52.434	6.274	5.9	2	3	2	13.025	9.4	3	4	3	6.1731	6.5	2	3	2	0.581	0.627	0.619	1.304	1.298	1.299	1.252	1.184	1.204	2.13519	1.09832e-06	1.99234	1.64694e-05	0.933094	0.0127087
CSA000970.1	trifunctional UDP-glucose 4,6-dehydratase/UDP-4-keto-6-deoxy-D-glucose 3,5-epimerase/UDP-4-keto-L-rhamnose-reductase RHM1	3	3	75.789	48.714	30.9	19	26	7	40.846	24	14	19	5	23.86	20.5	12	19	4	1.372	1.367	1.317	0.868	0.861	0.856	0.627	0.642	0.716	0.637327	1.05643e-05	0.489398	2.95299e-05	0.767892	0.0019591
CSA000973.1	choline transporter-like protein 2	3	2	78.37	6.4129	4.9	3	3	3	11.878	8.2	4	5	4	10.193	4	2	3	2	1.181		1.219	0.883		0.928	0.875		0.774	0.754583	0.00985187	0.687083	0.0200289	0.910547	0.280504
CSA000974.1	putative nuclear RNA export factor SDE5 isoform X2	1	0	57.032	1.6909	3	1	1	1
CSA000978.1	coronatine-insensitive protein 1	1	0	43.643											1.6786	2.3	1	1	1
CSA000980.1	late embryogenesis abundant hydroxyproline-rich glycoprotein	3	3	19.676	1.7887	3.8	1	1	1	24.921	14.2	2	3	2	17.439	14.2	2	3	2	0.71	0.747	0.658	1.179	1.053	1.056	1.208	1.293	1.409	1.55461	0.0013245	1.8487	0.000716545	1.18917	0.0441809
CSA000992.1	PI-PLC X-box domain-containing protein DDB_G0293730	3	3	36.317	56.477	23.9	5	8	5	32.79	26.1	6	8	6	49.499	23.9	5	7	5	0.639	0.664	0.701	1.2	1.211	1.165	1.317	1.241	1.235	1.78443	2.09806e-05	1.89271	4.85056e-05	1.06068	0.0722704
CSA000996.1	cellulose synthase A catalytic subunit 4	3	3	119.49	6.9035	3.9	3	3	1	4.588	4.5	4	4	1	3.4733	2.2	2	3	1	1.304	1.119	1.246	1.239	1.364	1.256	0.321	0.442	0.383	1.05179	0.399349	0.312347	0.000203897	0.296968	6.64649e-05
CSA000997.1	protein PHOSPHATE STARVATION RESPONSE 1	1	0	52.271	1.6449	3.1	1	1	1
CSA001000.1	protein trichome birefringence-like 23	1	1	30.622						1.6321	3.4	1	1	1							1.008			0.939			1.055		0.931548		1.04663		1.12354
CSA001003.1	50S ribosomal protein L17, chloroplastic-like	2	1	23.958						2.7929	9.9	2	2	2	3.1975	9.9	2	3	2			1.214			0.892			0.82	0.734761		0.675453		0.919283
CSA001004.1	ycf54-like protein	3	3	25.127	68.67	37.8	6	11	6	133.72	37.8	6	15	6	140.57	37.8	6	13	6	0.866	0.813	0.836	1.212	1.208	1.223	0.976	0.932	0.967	1.44851	1.93711e-05	1.14314	0.00416324	0.789185	5.4881e-05
CSA001005.1	bifunctional bis(5'-adenosyl)-triphosphatase/adenylylsulfatase FHIT	3	3	10.204	35.919	41.4	4	4	4	68.537	31	3	4	3	16.897	31	3	3	3	1.085	1.124	1.129	0.935	0.945	0.897	0.952	0.912	0.865	0.831935	0.000754157	0.817555	0.00211726	0.982715	0.611507
CSA001006.1	bis(5'-adenosyl)-triphosphatase	3	3	15.009	72.915	14.1	1	1	1	45.957	14.1	1	1	1	29.049	14.1	1	1	1	1.123	1.058	1.081	0.888	0.96	0.936	0.951	0.963	0.957	0.853464	0.00499854	0.880135	0.00252762	1.03125	0.247726
CSA001021.1	putative kinase-like protein TMKL1	1	0	73.635											1.4129	1.2	1	1	1
CSA001024.1	COP9 signalosome complex subunit 5b	3	0	21.872	2.9497	6.8	1	1	1	1.5209	6.8	1	1	1	3.4532	6.8	1	1	1
CSA001026.1	cell wall protein DAN4-like isoform X2	3	2	41.136	2.9526	5.6	2	2	2	4.6779	4.3	2	2	2	6.2233	10.9	4	4	4		1.334	1.343		0.97	0.931		0.571	0.6	0.710123	0.00264978	0.43743	0.000406271	0.615992	0.0044031
CSA001027.1	DNA-directed RNA polymerase IV subunit 1 isoform X1	3	1	175.4	3.2498	1.3	2	3	2	2.7547	1.3	2	3	2	1.7354	0.7	1	2	1	1.2			0.888			0.844			0.74		0.703333		0.95045
CSA001037.1	partner of Y14 and mago isoform X1	3	3	11.277	4.2656	13.4	1	1	1	6.5332	13.4	1	1	1	4.5221	13.4	1	1	1	1.521	1.424	1.453	0.795	0.86	0.847	0.5	0.564	0.538	0.568895	5.49136e-05	0.364256	1.08193e-05	0.640288	0.000383981
CSA001040.1	exosome complex component RRP4 homolog	3	3	37.24	6.0805	6.7	2	2	2	4.483	6.7	2	2	2	7.6234	10.6	3	3	3	1.117	1.111	1.13	1.221	1.189	1.198	0.6	0.642	0.607	1.07445	0.00165906	0.550625	3.7378e-06	0.512472	3.40291e-06
CSA001046.1	adenosine/AMP deaminase family protein	3	3	41.05	21.324	13.8	4	6	4	47.909	23.6	6	8	6	61.127	20.1	6	8	6	1.29	1.249	1.29	0.974	0.966	0.927	0.627	0.678	0.671	0.748759	8.74218e-05	0.516062	7.97557e-06	0.689222	0.000161414
CSA001057.1	serine/threonine-protein phosphatase 6 regulatory subunit 3 isoform X4	3	3	103.73	23.022	7.1	5	5	5	26.617	5.7	4	4	3	8.5507	3.9	4	4	4	1.036	0.703	0.967	1.112	0.991	1.134	0.829	1.42	0.9	1.19623	0.185353	1.16371	0.524707	0.972814	0.885692
CSA001060.1	replication factor C subunit 2	3	3	38.005	33.147	38.7	10	10	10	56.567	37.2	10	10	10	58.191	36.9	10	11	10	1.171	1.143	1.344	0.913	0.899	0.868	0.869	0.853	0.662	0.732641	0.00710929	0.651722	0.00972546	0.889552	0.219352
CSA001061.1	60S ribosomal protein L24-like	3	3	18.496	34.704	33.1	6	12	4	35.321	33.7	6	11	4	36.029	33.7	7	14	4	1.959	1.998	1.957	0.402	0.385	0.415	0.289	0.279	0.307	0.203247	6.33379e-08	0.147954	4.5303e-08	0.727953	0.00079882
CSA001065.1	BAG family molecular chaperone regulator 1-like	1	1	33.961	1.3907	3.6	1	1	1											0.814			1.041			1.212			1.27887		1.48894		1.16427
CSA001067.1	sm-like protein LSM5	1	0	9.614											2.9787	37.9	2	2	2
CSA001069.1	3-ketoacyl-CoA thiolase 2, peroxisomal	3	3	48.82	58.118	31.3	10	16	7	80.717	44.1	14	23	10	69.118	35.9	12	16	9	1.085	1.087	1.184	0.924	0.929	0.909	0.962	0.938	0.89	0.823004	0.00397811	0.831347	0.0083608	1.01014	0.693244
CSA001071.1	sterol 3-beta-glucosyltransferase UGT80A2-like	3	3	26.687	29.519	27.6	5	7	5	45.28	35.8	6	9	6	38.712	35.8	6	7	6	1.138	1.121	1.1	0.984	0.947	0.942	0.836	0.89	0.866	0.855314	0.000710123	0.771658	0.000180104	0.902193	0.0102337
CSA001076.1	polygalacturonase At1g48100	1	1	41.024											22.63	6.3	1	1	1			0.71			1.636			0.715	2.30423		1.00704		0.437042
CSA001089.1	probable inactive receptor kinase At5g58300	3	0	83.481	1.8985	1.2	1	1	1	2.3469	2.9	2	2	2	3.1891	4.7	3	3	2
CSA001090.1	import inner membrane translocase subunit	3	3	41.269	90.061	19.4	7	10	7	40.349	16.9	5	7	5	63.06	21	7	11	7	0.846	0.845	0.88	0.977	1.019	1.029	1.178	1.202	1.178	1.17658	0.00152945	1.3839	1.95039e-05	1.1762	0.000569344
CSA001106.1	double-stranded RNA-binding protein 2	1	1	9.6749											2.551	19.3	2	2	2			1.134			0.924			0.896	0.814815		0.790123		0.969697
CSA001107.1	26S proteasome non-ATPase regulatory subunit 6 homolog	3	3	9.3135	55.815	17.1	1	2	1	4.9663	17.1	1	1	1	23.454	17.1	1	2	1	1.141	1.092	1.1	1.048	1.016	1.043	0.754	0.855	0.816	0.932193	0.0142307	0.727573	0.000793171	0.780496	0.00184974
CSA001108.1	26S proteasome non-ATPase regulatory subunit 6	3	3	40.679	55.235	26.2	7	14	7	46.849	28.5	8	18	8	38.78	24.2	6	13	6	1.12	1.123	1.141	1.015	0.996	1.02	0.817	0.841	0.776	0.895686	0.000278092	0.719267	9.4415e-05	0.803035	0.000611167
CSA001109.1	oxygen-independent coproporphyrinogen-III oxidase-like protein sll1917	1	0	38.355						3.1948	5.6	1	1	1
CSA001110.1	elongator complex protein 3-like isoform X1	2	2	71.04						12.898	9.3	5	6	5	14.322	7.6	4	4	4		0.935	1.016		0.909	0.968		1.188	1.012	0.962071	0.537138	1.12763	0.327457	1.17208	0.223977
CSA001113.1	elongation factor Tu, mitochondrial	1	1	55.215						31.508	27.1	14	41	1							0.955			1.119			0.933		1.17173		0.976963		0.83378
CSA001114.1	glutamine synthetase leaf isozyme, chloroplastic	3	3	47.936	321.83	52.5	20	56	20	323.31	52.1	19	51	19	323.31	53.7	21	53	21	0.532	0.462	0.538	1.053	1.051	1.034	1.516	1.619	1.568	2.0483	2.87059e-05	3.06984	1.04254e-05	1.49873	6.71188e-05
CSA001117.1	alpha/beta-hydrolase superfamily protein	3	2	62.355	3.7966	2	1	2	1	2.894	2	1	2	1	1.8694	2	1	1	1	0.762		0.748	1.07		1.119	1.254		1.22	1.44967	0.00558575	1.63841	0.0014517	1.1302	0.0411104
CSA001129.1	nuclear poly(A) polymerase 4 isoform X1	2	0	76.93	4.2998	2.3	1	1	1	4.0815	2.3	1	1	1
CSA001131.1	cell division control protein 2 homolog isoform X1	1	0	21.53						3.104	29.1	5	5	1
CSA001133.1	NADP-dependent malic enzyme isoform X1	3	3	64.836	38.863	18.2	9	9	5	54.44	16.2	10	13	5	35.863	18.2	8	9	4	1.669	1.618	1.459	0.518	0.568	0.637	0.614	0.668	0.757	0.363043	0.000151501	0.429625	0.000284406	1.1834	0.123446
CSA001135.1	pentatricopeptide repeat-containing protein At1g02150	3	3	62.975	73.028	26.4	12	17	12	50.218	20.8	10	13	10	70.8	22.4	10	16	10	0.796	0.795	0.794	1.34	1.435	1.481	0.879	0.793	0.757	1.78449	0.000114441	1.01845	0.706061	0.570724	0.000380343
CSA001144.1	trafficking protein particle complex subunit 6B isoform X1	3	3	20.852	5.6999	16.6	3	4	2	11.778	12.8	2	3	2	1.8891	12.8	2	3	1	1.38	1.239	1.405	0.962	0.957	0.975	0.514	0.737	0.466	0.719185	0.00192101	0.42669	0.00143514	0.593296	0.00938172
CSA001146.1	superoxide dismutase	3	3	14.199	2.8861	25.9	3	3	2	2.8454	18.7	2	3	1	4.0265	9.4	1	1	1	1.171	0.982	0.989	0.883	0.951	0.919	0.889	1.078	1.103	0.876194	0.116427	0.977085	0.806258	1.11515	0.207509
CSA001147.1	bifunctional D-cysteine desulfhydrase/1-aminocyclopropane-1-carboxylate deaminase, mitochondrial[Daucus carota subsp. sativus]	3	3	42.899	38.308	18.2	6	8	6	33.094	20.3	7	10	7	31.634	20.3	7	11	7	1.234	1.281	1.402	0.854	0.828	0.758	0.832	0.752	0.706	0.622926	0.00103327	0.584631	0.000948463	0.938525	0.344232
CSA001150.1	heat shock protein 70	3	3	61.864	16.827	10.7	5	6	5	16.728	12	6	7	6	13.825	9.1	5	7	5	0.878	0.979	0.927	0.911	0.878	0.871	1.259	1.229	1.161	0.95546	0.261754	1.3107	0.00217792	1.3718	0.000471379
CSA001152.1	Naringenin,2-oxoglutarate 3-dioxygenase	3	3	23.498	58.288	32.5	5	6	4	58.662	44.2	6	6	5	28.112	40.8	6	6	6	1.05	1.097	1.095	0.843	0.734	0.759	1.1	1.154	1.102	0.720543	0.00114784	1.03516	0.179817	1.43664	0.000812367
CSA001158.1	cytochrome P450 CYP73A100-like	2	1	62.856						2.0893	3.9	1	1	1	15.5	3.9	1	1	1			1.334			0.864			0.685	0.647676		0.513493		0.792824
CSA001160.1	peroxidase 64	3	2	34.504	8.2716	9.8	2	2	2	25.606	22.4	6	7	6	13.293	17.7	5	5	5		0.574	0.53		1.488	1.649		0.98	0.95	2.84149	0.00667261	1.74819	0.00413094	0.615237	0.017917
CSA001163.1	UBP1-associated proteins 1C	1	1	35.815						1.5064	6.8	2	2	2							1.151			0.853			0.95		0.741095		0.825369		1.11372
CSA001168.1	protein NETWORKED 1B-like	1	0	49.628	2.1301	2	1	1	1
CSA001169.1	multiprotein-bridging factor 1b	3	3	15.516	37.662	31	5	12	4	30.72	29.6	5	11	2	21.675	23.9	3	9	2	1.511	1.451	1.457	0.913	0.883	0.903	0.504	0.546	0.624	0.610772	1.07411e-05	0.378819	2.16368e-05	0.62023	0.000706127
CSA001170.1	polynucleotide 3'-phosphatase ZDP	3	3	8.5206	6.3264	27.3	2	4	2	2.5211	13	1	2	1	6.0829	27.3	2	4	2	1.619	1.555	1.541	0.682	0.738	0.671	0.486	0.515	0.606	0.443478	1.03002e-05	0.340827	1.8258e-05	0.768532	0.0179799
CSA001171.1	polynucleotide 3'-phosphatase ZDP-like isoform X2	3	2	14.522	4.1938	12.4	1	1	1	5.481	12.4	1	1	1	8.9929	17.8	2	3	2		1.33	1.211		0.805	0.856		0.753	0.863	0.65368	0.0209668	0.63597	0.0293478	0.972908	0.746159
CSA001172.1		3	2	6.0756	8.5	22.6	1	1	1	1.3128	22.6	1	1	1	1.9809	22.6	1	1	1	1.744	1.59		0.642	0.7		0.356	0.508		0.402519	0.00675541	0.259148	0.00758705	0.643815	0.0989468
CSA001173.1	polynucleotide 3'-phosphatase ZDP	2	2	15.105						10.614	8.1	1	1	1	17.799	8.1	1	1	1		1.504	1.645		0.749	0.677		0.574	0.457	0.452842	0.00833756	0.327406	0.00740044	0.723001	0.102669
CSA001178.1	cytochrome c oxidase-assembly factor COX23, mitochondrial-like	3	3	7.7047	2.2264	16.4	1	1	1	2.2893	16.4	1	1	1	3.4769	16.4	1	1	1	0.566	0.737	0.658	1.032	0.977	0.914	1.566	1.389	1.565	1.49057	0.0059181	2.30495	0.000374415	1.54636	0.0014373
CSA001183.1	sec1 family domain-containing protein MIP3	3	2	84.4	9.555	3.8	2	3	2	14.477	5.7	3	3	3	5.2309	2.6	2	3	2	0.929		0.915	1.055		1.083	1.039		1.027	1.15944	0.0111486	1.12039	0.00682821	0.966324	0.141884
CSA001184.1	50S ribosomal protein L25	3	2	38.836	10.278	17.4	4	5	4	11.698	12.6	3	3	3	3.6991	8.4	2	2	2	1.076		1.073	0.99		0.972	0.906		0.928	0.912983	0.00938882	0.85342	0.00493178	0.93476	0.0459443
CSA001185.1	50S ribosomal protein L4	3	2	37.852	11.758	13.4	4	4	4	13.125	12.8	3	3	3	11.649	14	3	3	3	1.013	1.392		0.934	0.915		1.054	0.55		0.768815	0.28049	0.666944	0.331784	0.867496	0.675141
CSA001188.1	aspartate aminotransferase, mitochondrial isoform X1	3	3	45.376	62.922	25.4	8	8	8	21.662	14.2	6	7	6	47.844	18.8	6	6	6	0.953	0.909	0.965	1.039	1.044	1.045	0.999	1.052	1.008	1.10647	0.00423456	1.08207	0.0306703	0.977941	0.235288
CSA001190.1	ras-related protein RABA4d-like	3	3	24.883	9.581	31.2	7	12	2	6.3871	30.4	7	12	2	7.2512	29	7	13	2	1.243	1.365	1.143	1.03	0.989	1.064	0.632	0.507	0.734	0.821914	0.0303174	0.499334	0.00241871	0.607525	0.00430076
CSA001197.1	protein NRT1/ PTR FAMILY 3.1	1	0	70.714											2.0332	1.3	1	1	1
CSA001198.1	cytochrome P450 98A2	3	3	18.982	30.961	14.5	3	5	3	21.327	14.5	3	4	3	26.918	14.5	3	5	3	1.161	1.137	1.15	1.119	1.135	1.183	0.64	0.663	0.593	0.99681	0.866369	0.549884	1.84789e-05	0.551644	5.32751e-05
CSA001206.1	T-complex protein 1 subunit delta	3	3	58.178	9.1143	44.5	22	33	3	11.978	39.1	19	32	2	17.259	48.1	24	41	4	1.409	1.403	1.208	0.727	0.742	0.799	0.728	0.722	0.928	0.564179	0.001102	0.591542	0.00442662	1.0485	0.633501
CSA001207.1	zinc finger CCCH domain-containing protein 11-like	3	3	46.098	19.006	14.7	4	4	4	3.6182	5	2	2	2	8.1094	6.7	2	2	2	1.489	1.492	1.341	0.797	0.767	0.845	0.542	0.571	0.695	0.557381	0.000311161	0.418325	0.000255636	0.750519	0.0184119
CSA001213.1	putative quinone-oxidoreductase homolog, chloroplastic	3	2	8.1747	15.725	62.7	4	5	3	52.45	62.7	4	6	3	23.137	53.3	3	4	2		0.619	0.645		1.156	0.993		1.399	1.499	1.70016	0.0330698	2.29272	0.00397474	1.34853	0.0594333
CSA001215.1	AMSH-like ubiquitin thioesterase 1 isoform X1	1	1	58.574						-2	2.3	1	1	1							1.369			0.422			1.114		0.308254		0.813733		2.63981
CSA001216.1	protein FREE1	3	3	41.406	58.837	38.7	11	12	10	54.749	26.8	8	9	7	72.753	32.6	10	11	9	1.144	1.142	1.119	0.996	0.978	1.009	0.827	0.817	0.806	0.876065	0.000307502	0.71953	5.93386e-06	0.821321	8.11909e-05
CSA001221.1	aspartic proteinase-like	2	1	37.791						1.5595	2.6	1	1	1	1.4917	2.6	1	1	1		0.79			0.981			1.312		1.24177		1.66076		1.33741
CSA001226.1	plant/MOJ10-14 protein	3	3	21.256	5.0585	10.8	2	3	2	3.7016	10.8	2	3	2	5.8284	10.8	2	3	2	0.83	0.861	0.868	1.012	1.051	1.016	1.222	1.137	1.165	1.2032	0.000524	1.3771	0.000309858	1.14453	0.00602595
CSA001232.1	alpha/beta fold hydrolase	2	1	39.331						11.954	5.2	1	1	1	5.7442	5.2	1	2	1			0.993			1.181			0.814	1.18933		0.819738		0.689246
CSA001233.1	nifU-like protein 3, chloroplastic	3	3	7.945	14.203	50	2	4	2	9.4247	50	2	3	2	6.8842	36.8	2	3	2	0.597	0.72	0.568	0.94	0.903	0.862	1.665	1.492	1.746	1.43501	0.00616326	2.60106	0.000337306	1.81257	0.000723716
CSA001234.1	diphosphomevalonate decarboxylase MVD2-like	3	3	35.906	61.424	34	11	14	11	89.882	39.6	11	15	11	95.543	42.6	13	18	13	1.143	1.245	1.181	1.017	0.995	0.956	0.768	0.772	0.778	0.831605	0.0044678	0.649482	0.000153375	0.780997	0.000277345
CSA001250.1	coiled-coil-helix-coiled-coil-helix domain-containing protein 10, mitochondrial	3	3	14.581	3.3363	12	2	3	2	2.7517	12	2	3	2	1.6218	5.6	1	2	1	0.83	0.997	0.873	0.924	0.918	0.921	1.317	1.079	1.261	1.02333	0.696591	1.35444	0.0219065	1.32356	0.0142978
CSA001254.1	cystic fibrosis transmembrane conductance regulator	1	0	16.915											1.5285	5.2	1	1	1
CSA001272.1	catalase isozyme 3	3	3	58.486	88.026	48.8	22	78	4	125.41	56.1	24	74	6	110.08	50.6	23	76	5	0.743	0.706	0.668	1.04	1.002	0.95	1.326	1.356	1.474	1.41332	0.00100295	1.96316	0.000170797	1.38904	0.00174441
CSA001274.1	1,4-alpha-glucan-branching enzyme 1, chloroplastic/amyloplastic isoform X1	3	3	103.83	96.198	21.7	14	16	14	128.32	22.1	15	18	15	89	18.2	14	17	14	0.842	0.845	0.857	0.925	0.915	0.911	1.309	1.276	1.275	1.08137	0.000368934	1.5173	3.42614e-06	1.40313	6.44408e-06
CSA001280.1	pinin	3	3	48.648	28.567	15.4	6	6	6	36.17	14.3	6	6	6	8.1141	8.6	4	4	4	1.332	1.393	1.395	0.966	1.006	1.018	0.64	0.476	0.533	0.725728	0.000131437	0.400243	9.5167e-05	0.551505	0.00090469
CSA001282.1	COP9 signalosome complex subunit 8	3	3	25.101	16.661	28.1	6	10	6	16.558	31.3	7	11	7	20.171	22.6	5	9	5	1.129	1.197	1.246	1.014	0.931	0.928	0.771	0.77	0.707	0.804311	0.00615619	0.629339	0.000383107	0.782457	0.00410092
CSA001286.1	kinesin light chain 4	3	2	54.805	20.842	11.5	5	5	5	47.868	11.7	5	5	5	24.739	12.5	6	6	6	1.008	1.08		1.002	1.01		0.987	0.878		0.963602	0.40421	0.893199	0.22993	0.926938	0.310846
CSA001288.1	BRCA1-A complex subunit BRE	3	3	41.756	25.9	26	10	11	10	29.345	23.5	9	10	9	10.778	17.4	7	7	7	1.079	1.134	1.196	0.969	0.966	0.977	0.913	0.838	0.754	0.854209	0.00816579	0.73482	0.00614997	0.860234	0.0421096
CSA001289.1	tubulin beta chain-like	3	3	50.572	7.3562	45.7	17	40	3	14.687	45.5	16	36	3	10.979	49.4	17	41	4	1.243	1.313	1.288	0.913	0.906	0.832	0.789	0.701	0.783	0.689646	0.000272849	0.591311	0.000116288	0.857412	0.0305498
CSA001290.1	UDP-glycosyltransferase 74E2-like isoform X1	3	3	51.517	11.901	12.3	4	5	4	38.376	11.2	5	5	5	24.789	5.2	2	3	2	0.729	0.592	0.697	1.564	1.754	1.677	0.781	0.778	0.73	2.47522	0.00013559	1.13429	0.112536	0.458258	9.70934e-05
CSA001293.1	LETM1 and EF-hand domain-containing protein 1, mitochondrial	3	3	25.639	15.963	26.3	6	6	4	8.1414	17.1	4	4	2	13.355	21.1	5	5	2	0.867	1.043	0.898	1.138	1.105	1.121	0.996	0.828	1.011	1.19801	0.028169	1.00962	0.915738	0.842747	0.0412612
CSA001294.1	LETM1 and EF-hand domain-containing protein 1, mitochondrial isoform X3	3	3	56.744	8.4911	12.9	4	4	3	28.278	12.7	5	5	3	12.016	7.4	3	3	2	1.067	0.887	0.76	1.242	1.152	1.334	0.646	0.889	0.971	1.37362	0.0308267	0.92336	0.627465	0.67221	0.0212897
CSA001297.1	plant/F21F14-40 protein	3	2	10.784	2.182	11.5	1	1	1	6.3074	11.5	2	3	2	10.695	11.5	2	3	2		0.436	0.4		0.654	0.596		2.179	2.267	1.49522	0.0261276	5.31818	0.000692951	3.5568	0.00108571
CSA001298.1	protein RRP6-like 2	3	3	70.886	21.675	9.3	5	5	5	27.653	12.1	6	6	6	30.113	11.5	6	6	6	1.192	1.198	1.055	0.935	0.999	0.933	0.805	0.727	0.997	0.832221	0.020081	0.734107	0.0302357	0.882107	0.246661
CSA001300.1	ras-related protein RABH1b	3	3	27.018	44.511	37.9	8	17	4	70.963	40.7	9	18	4	47.454	40.7	9	19	4	1.347	1.301	1.187	0.904	0.928	0.959	0.615	0.684	0.786	0.727771	0.0022653	0.543677	0.00105872	0.747044	0.0107241
CSA001302.1	non-functional NADPH-dependent codeinone reductase 2-like	3	3	35.849	97.759	45.8	13	27	5	98.541	42.4	11	25	4	91.942	45.8	13	25	5	0.459	0.4	0.531	0.69	0.655	0.734	1.945	2.202	1.936	1.49568	0.00655443	4.37626	7.98929e-05	2.92593	0.000121182
CSA001303.1	non-functional NADPH-dependent codeinone reductase 2-like	3	3	24.801	4.7628	43.3	7	19	1	12.151	43.3	7	21	1	4.8527	43.3	7	18	1	1.088	0.807	0.875	0.815	0.837	0.917	0.953	1.434	1.263	0.927437	0.498576	1.31769	0.148676	1.42079	0.0667786
CSA001304.1	non-functional NADPH-dependent codeinone reductase 2-like	3	3	16.246	35.933	29.6	4	5	3	131.91	48.6	7	12	6	65.262	48.6	8	10	7	0.512	0.565	0.57	0.82	0.87	0.874	1.905	1.688	1.732	1.55677	0.000274165	3.23315	5.82071e-05	2.07683	0.000177218
CSA001306.1	non-functional NADPH-dependent codeinone reductase 2-like	2	1	6.6875	3.8936	35	2	5	1						4.4632	35	2	4	1			0.557			1.032			1.578	1.85278		2.83303		1.52907
CSA001307.1	GDSL esterase/lipase At4g28780-like	1	1	40.45											3.2388	14.4	3	4	2			0.962			1.314			0.714	1.3659		0.742204		0.543379
CSA001310.1	polyadenylate-binding protein-interacting protein 6	1	1	19.653	17.58	10.8	1	1	1											1.035			1.053			0.894			1.01739		0.863768		0.849003
CSA001321.1	dr1-associated corepressor homolog isoform X1	3	1	33.322	5.4844	8.5	2	2	2	8.044	13.1	3	3	3	7.3507	8.5	2	2	2		1.079			0.877			1.024		0.81279		0.949027		1.16762
CSA001325.1	argininosuccinate synthase, chloroplastic isoform X1	3	3	54.307	304.68	42.4	20	31	7	309.43	41	19	35	7	210.12	41	19	30	8	1.028	1.075	1.041	1.059	1.059	1.066	0.843	0.774	0.977	1.01272	0.401056	0.825064	0.040151	0.814698	0.0300013
CSA001330.1	5'-nucleotidase domain-containing protein 4	3	3	69.862	92.188	24.8	13	19	13	113.99	24.5	12	19	12	122.35	20.9	11	16	11	0.726	0.736	0.804	1.061	1.042	1.061	1.284	1.29	1.276	1.39629	0.000292566	1.69903	2.89501e-05	1.21681	6.96892e-06
CSA001343.1	protein NETWORKED 2A	1	0	120.32											1.5846	0.7	1	1	1
CSA001352.1	aspartate aminotransferase, cytoplasmic	3	3	49.914	141.59	48	17	31	16	152.33	43	14	27	14	105.03	43.7	15	28	14	1.129	1.048	1.104	1.039	1.017	1.074	0.746	0.915	0.798	0.953977	0.159138	0.749467	0.00779196	0.785623	0.0131842
CSA001356.1	zinc finger CCCH domain-containing protein 25 isoform X2	2	1	41.81	6.2075	3.9	1	1	1						11.425	3.9	1	1	1			1.434			0.724			0.697	0.504881		0.486053		0.962707
CSA001358.1	probable NAD(P)H dehydrogenase (quinone) FQR1-like 3 isoform X2	2	2	22.775	18.463	20.7	2	2	2	9.3826	12	1	1	1						0.615	0.645		1.29	1.238		1.221	1.234		2.00635	0.00223403	1.94841	0.000747747	0.971123	0.306333
CSA001360.1	ER membrane protein complex subunit 2	3	3	27.485	27.956	27.7	6	7	5	3.839	11.6	3	3	2	29.868	33.1	7	8	5	1.139	1.136	1.076	0.944	0.985	0.976	0.854	0.828	0.92	0.866905	0.00345071	0.776485	0.00187561	0.895697	0.0283527
CSA001361.1	ER membrane protein complex subunit 2	3	2	12.29	1.5904	11.6	1	1	1	5.6938	22.3	2	2	2	6.047	11.6	1	2	1		1.19	1.108		0.88	0.927		0.866	0.928	0.786336	0.0351139	0.780679	0.0391752	0.992806	0.882664
CSA001362.1	acyltransferase-like protein At1g54570, chloroplastic	2	2	22.128	2.3344	4.6	1	1	1						2.9555	4.6	1	1	1	0.762		0.766	1.372		1.35	0.928		0.946	1.78141	0.000350536	1.22644	0.00282801	0.688464	0.00112173
CSA001363.1	acyltransferase-like protein At1g54570, chloroplastic	1	0	14.424	2.4966	8.5	1	1	1
CSA001365.1	acyltransferase-like protein At1g54570, chloroplastic isoform X4	2	2	16.882	2.4827	5.8	1	1	1	19.223	13.5	1	1	1						0.686	0.742		1.101	1.191		1.326	1.15		1.60504	0.0147201	1.73389	0.0296829	1.08028	0.450214
CSA001367.1	probable glutathione S-transferase parC	2	0	31.901						1.2606	6.5	2	3	1	2.6841	11.9	4	5	3
CSA001372.1	signal recognition particle 9 kDa protein	3	0	11.008	4.0808	20.4	2	3	2	16.005	20.4	2	3	2	3.4867	20.4	2	3	2
CSA001374.1	signal recognition particle 9 kDa protein	2	2	9.631	2.6905	10.6	1	2	1	1.7095	10.6	1	1	1						1.273	1.266		0.901	0.9		0.73	0.74		0.709334	9.17904e-05	0.578968	0.00013036	0.816213	0.000920588
CSA001375.1	short-chain dehydrogenase TIC 32, chloroplastic isoform X1	3	3	31.91	14.072	8	3	6	3	24.636	8	3	8	3	12.861	8	3	7	3	0.635	0.418	0.486	1.066	1.035	1.063	1.473	1.773	1.68	2.05588	0.00112232	3.20078	0.000497353	1.55689	0.00275588
CSA001378.1	short-chain dehydrogenase TIC 32, chloroplastic-like isoform X2	3	3	8.7448	16.765	37.7	3	8	3	16.289	37.7	3	7	3	15.682	37.7	3	5	3	0.444	0.58	0.476	1.071	1.032	1.036	1.646	1.587	1.703	2.09267	0.00021865	3.29067	2.70813e-05	1.57248	7.39896e-05
CSA001379.1	short-chain dehydrogenase TIC 32, chloroplastic-like isoform X1	3	3	11.302	37.423	23.5	2	9	1	73.466	23.5	2	8	1	32.415	23.5	2	9	1	0.832	0.705	0.788	1.073	1.028	1.062	1.154	1.397	1.206	1.36043	0.00213414	1.61591	0.00447854	1.1878	0.0578049
CSA001385.1	B-cell receptor-associated protein 31-like	3	3	13.046	8.6932	44.1	4	4	4	11.241	44.1	4	4	4	4.7966	29.7	3	3	3	1.178	1.258	1.116	1.005	0.978	1.157	0.766	0.667	0.671	0.884009	0.118315	0.592342	0.000766599	0.670064	0.00584617
CSA001386.1	O-fucosyltransferase family protein	2	2	62.297	1.685	2	1	1	1						1.8507	2	1	1	1	0.836		0.877	0.951		0.941	1.28		1.234	1.1045	0.0513419	1.4676	0.00586599	1.32875	0.00567907
CSA001389.1	ankyrin repeat and SAM domain-containing protein 6	3	3	30.685	5.9721	11.5	2	2	2	3.9987	4.8	1	1	1	1.6275	4.8	1	1	1	1.434	1.122	1.138	0.89	1.023	1.043	0.517	0.806	0.763	0.800217	0.0934876	0.5647	0.0167894	0.705683	0.0467592
CSA001392.1	GPI transamidase component PIG-T	3	0	57.095	5.5179	5.9	3	3	3	4.431	5.9	3	3	3	5.8002	5.9	3	3	3
CSA001404.1	ATP synthase gamma chain, chloroplastic	3	3	41.327	254.62	35.7	13	34	8	243.62	37.3	13	37	8	307.12	39.5	14	34	9	0.441	0.349	0.445	0.794	0.815	0.809	2.012	2.025	2.018	1.95789	0.000248255	4.90283	8.93129e-07	2.50414	7.83302e-09
CSA001405.1	starch synthase 3, chloroplastic/amyloplastic isoform X3	1	1	25.641	4.9647	11.4	2	2	2											0.721			1.094			1.285			1.51734		1.78225		1.17459
CSA001406.1	starch synthase 3, chloroplastic/amyloplastic	2	2	16.643						4.8867	6.9	1	1	1	21.905	6.9	1	2	1		0.606	0.562		1.04	1.036		1.501	1.567	1.7774	0.00235922	2.62671	0.00173839	1.47784	0.00441341
CSA001407.1	starch synthase 3, chloroplastic/amyloplastic isoform X1	2	2	8.0713	2.3243	12.3	1	2	1						1.5388	12.3	1	1	1	0.671		0.591	0.958		0.954	1.501		1.616	1.51506	0.0148484	2.46989	0.00565491	1.63023	0.00899612
CSA001408.1	starch synthase 3, chloroplastic/amyloplastic	3	3	80.351	31.745	12	9	10	9	22.217	6	4	5	4	18.897	7	6	8	6	0.723	0.764	0.835	1.022	1.043	1.094	1.348	1.124	1.116	1.36047	0.00203622	1.54522	0.00699151	1.1358	0.144461
CSA001411.1	probable transcription factor PosF21	2	2	24.511						2.2299	9	2	2	2	1.763	9	2	2	2		1.304	1.218		0.832	0.91		0.761	0.795	0.690722	0.0214463	0.616971	0.00904051	0.893226	0.160389
CSA001413.1	electron transfer flavoprotein-ubiquinone oxidoreductase, mitochondrial-like	3	2	13.902	2.9391	12.8	1	1	1	13.538	12.8	1	2	1	5.7039	12.8	1	3	1		0.857	1.002		0.96	0.918		1.241	1.095	1.01022	0.911353	1.25659	0.146322	1.24388	0.0946636
CSA001416.1	electron transfer flavoprotein-ubiquinone oxidoreductase, mitochondrial isoform X3	3	0	14.189	3.5292	10.5	1	1	1	2.9813	10.5	1	1	1	1.9136	10.5	1	2	1
CSA001417.1	electron transfer flavoprotein-ubiquinone oxidoreductase, mitochondrial-like	1	0	14.005						1.1396	8.7	1	1	1
CSA001425.1	delta(24)-sterol reductase	3	3	66.133	145.78	36.5	17	25	17	74.45	31.9	17	25	17	65.166	32.1	17	30	17	1.424	1.391	1.38	0.822	0.812	0.839	0.687	0.708	0.665	0.589511	3.08684e-06	0.491061	2.51922e-06	0.832996	0.000724947
CSA001426.1	pathogenesis-related protein 5	1	1	26.49	5.8207	5.6	1	1	1											0.813			1.08			1.173			1.32841		1.4428		1.08611
CSA001431.1	transcription termination factor family protein	3	3	22.632	31.945	24.4	5	5	5	8.4152	19.8	4	4	4	13.479	27.4	5	5	5	0.611	0.705	0.536	1.007	1.036	0.98	1.532	1.368	1.664	1.63229	0.00162417	2.46436	0.000785462	1.50976	0.00414023
CSA001435.1	ATPase 9, plasma membrane-type	3	0	104.19	2.4937	17.5	16	34	0	2.2619	18.5	17	29	0	2.6035	17.5	16	29	0
CSA001437.1	EMB1793	2	2	18.77						5.2538	8.3	1	1	1	3.4904	8.3	1	1	1		1.147	1.17		0.959	0.988		0.842	0.778	0.840311	0.00985955	0.69918	0.00938637	0.832049	0.0432009
CSA001441.1	myosin-12	1	1	131.36	1.2965	0.8	1	1	1											1.347			0.898			0.629			0.666667		0.466964		0.700445
CSA001445.1	GDSL esterase/lipase 1-like	3	3	40.596	50.534	28	9	20	9	162.35	30.2	11	23	11	122.64	30.2	11	24	11	1.38	1.46	1.479	1.023	0.994	1.014	0.466	0.419	0.38	0.701783	0.000168233	0.292892	1.30892e-05	0.417354	2.35815e-05
CSA001448.1	small heat shock protein, chloroplastic-like isoform X2	3	3	22.417	98.361	48.7	10	35	10	57.667	36.2	10	36	10	52.78	36.2	10	36	10	0.856	0.885	0.889	0.694	0.695	0.68	1.498	1.464	1.483	0.786692	8.28302e-05	1.69011	1.87304e-06	2.14838	2.20123e-07
CSA001455.1	RNA polymerase II C-terminal domain phosphatase-like 3 isoform X2	3	2	144.15	1.7611	1	1	1	1	2.3254	1	1	1	1	2.6268	1	1	1	1		1.14	1.124		0.951	0.953		0.859	0.879	0.840989	0.00200016	0.767668	0.00236261	0.912815	0.0143463
CSA001463.1	uncharacterized GTP-binding protein YjiA	3	3	50.275	96.399	34.2	14	27	13	161.31	49.2	17	32	16	80.233	37.7	15	26	14	0.921	0.94	0.926	0.973	0.97	0.991	1.114	1.14	1.118	1.05274	0.00484788	1.2099	3.8914e-05	1.14928	0.000149862
CSA001471.1	AP-2 complex subunit sigma-like	3	3	8.1775	10.881	50	5	8	5	11.892	27.9	3	8	3	3.2999	13.2	1	4	1	1.135	1.221	1.237	1.005	0.933	0.988	0.77	0.755	0.685	0.814361	0.00442619	0.615085	0.000359792	0.755297	0.00217709
CSA001479.1	transferring glycosyl group transferase	3	3	18.96	13.627	25.2	3	3	3	22.102	25.2	3	3	3	29.185	14.7	2	2	2	0.712	0.634	0.621	1.157	1.138	1.277	1.23	1.357	1.226	1.81596	0.00050224	1.93849	0.000282288	1.06747	0.259464
CSA001480.1		1	1	7.1391	5.5679	27	1	1	1											0.697			1.097			1.316			1.57389		1.88809		1.19964
CSA001482.1	ADP-ribosylation factor 1	3	3	13.51	52.957	13.4	1	2	1	25.263	21.8	2	2	1	77.872	30.3	2	4	2	1.38	1.37	1.168	0.99	1.025	1.003	0.485	0.461	0.798	0.770291	0.0126729	0.445125	0.00488886	0.577866	0.0176188
CSA001483.1	ADP-ribosylation factor 3 isoform X1	1	1	7.0592						9.3612	16.9	1	2	1							1.233			0.971			0.709		0.78751		0.57502		0.730175
CSA001485.1	probable acyl-activating enzyme 5, peroxisomal	1	1	34.863	8.9637	8.1	2	2	2											1.173			0.868			0.904			0.739983		0.770673		1.04147
CSA001488.1	probable transcription factor PosF21	1	0	23.347	1.8872	6.3	1	1	1
CSA001490.1	E3 ubiquitin-protein ligase Hakai	2	2	41.129	19.6	5.3	1	1	1						13.641	5.3	1	1	1	1.337		1.323	0.834		0.883	0.712		0.68	0.645489	0.00290771	0.523308	0.000757927	0.810716	0.0309295
CSA001494.1	ABC transporter F family member 1	3	3	66.232	127.3	25.8	12	15	9	59.897	18.7	10	13	8	54.636	19.4	10	15	7	1.359	1.374	1.393	0.967	0.99	1.007	0.495	0.464	0.437	0.718371	1.40931e-05	0.338342	1.24345e-06	0.470985	1.37149e-05
CSA001495.1	linoleate 13S-lipoxygenase 2-1, chloroplastic-like	3	3	69.854	10.971	29.2	20	32	5	6.1747	25.9	18	27	4	9.4095	22.3	17	25	4	0.716	0.69	0.685	1.122	1.062	1.106	1.344	1.295	1.322	1.57341	3.96391e-05	1.89431	3.39745e-06	1.20395	0.000611445
CSA001498.1	germin-like protein subfamily 3 member 2	1	1	24.526	2.4052	5	1	1	1											0.982			1.334			0.665			1.35845		0.677189		0.498501
CSA001503.1	NADH dehydrogenase	3	3	17.339	6.0154	20.5	4	6	4	4.8359	16	3	6	3	6.1594	15.4	3	5	3	1.043	1.054	0.978	0.992	0.936	1.003	0.949	0.995	1.028	0.953171	0.202308	0.966504	0.356531	1.01399	0.68119
CSA001506.1	homeobox protein BEL1 homolog	1	1	51.615											2.7154	2.4	1	1	1			0.509			1.162			1.505	2.28291		2.95678		1.29518
CSA001510.1	somatic embryogenesis receptor kinase 2	2	2	68.949	18.689	9.1	4	5	4						3.373	3.4	2	2	2	1.226		1.056	0.86		1.22	0.774		0.685	0.911481	0.662302	0.639351	0.050296	0.701442	0.235997
CSA001515.1	transcriptional adapter ADA2b isoform X2	2	0	43.711	2.7594	3.9	2	2	2	1.5168	3.9	2	2	2
CSA001516.1	transcriptional adapter ADA2b isoform X2	3	2	21.748	33.456	23.7	3	4	2	1.3705	12.4	2	2	1	39.16	23.7	3	4	2	1.402		1.233	0.934		0.932	0.515		0.751	0.708159	0.0450638	0.480455	0.0421361	0.678457	0.126111
CSA001517.1	LOW QUALITY PROTEIN: multicystatin	1	0	22.311											6.4502	9.6	1	1	1
CSA001524.1	RAN GTPase-activating protein 1	2	0	59.118						1.7231	2.2	1	1	1	4.8809	4.4	2	2	2
CSA001525.1	probable ATP-dependent DNA helicase CHR12	2	0	211.11	2.1858	0.7	1	1	1						2.4826	0.7	1	1	1
CSA001527.1	histidine phosphatase family (branch 1) protein	3	3	27.219	35.85	19.3	3	3	3	28.392	22.6	4	6	4	26.259	18.5	4	4	4	0.622	0.659	0.542	1.006	0.998	1.037	1.516	1.474	1.594	1.66813	0.000372393	2.51454	4.83786e-05	1.5074	0.000157179
CSA001531.1	DNA (cytosine-5)-methyltransferase DRM2	1	0	69.158						1.8173	2.7	1	1	1
CSA001534.1	poly(ADP-ribose) glycohydrolase 1 isoform X1	1	0	53.949						1.666	3.8	2	2	2
CSA001536.1	metal-independent phosphoserine phosphatase isoform X2	2	0	15.208						2.795	7.2	1	1	1	1.8446	7.2	1	1	1
CSA001537.1	6,7-dimethyl-8-ribityllumazine synthase, chloroplastic	3	3	27.038	39.642	23.3	6	10	6	31.934	15.4	5	7	5	58.726	23.3	6	8	6	0.892	0.86	0.909	1.092	1.126	1.119	1.006	1.027	1.017	1.25404	0.000219994	1.14619	0.00114209	0.913995	0.00134546
CSA001546.1	histone H1	3	1	47.105	1.525	3.1	1	1	1	1.3921	3.1	1	1	1	1.9283	5.2	2	2	2			1.253			0.906			0.753	0.723065		0.600958		0.831126
CSA001548.1	mitogen-activated protein kinase 9	1	1	12.922											6.4298	17.1	1	1	1			1.064			1.068			0.838	1.00376		0.787594		0.784644
CSA001552.1	pentatricopeptide repeat-containing protein PNM1, mitochondrial	2	2	61.01	2.9187	3.4	2	2	2						3.4273	3.4	2	2	2	1.168		1.284	0.854		0.875	0.924		0.742	0.705139	0.0255702	0.679445	0.067817	0.963563	0.76373
CSA001553.1	cleavage stimulation factor subunit 50	3	3	54.236	16.386	11.4	4	4	4	9.9191	4.3	2	3	2	11.495	9	3	4	3	1.062	1.054	1.089	1.031	1.052	1.002	0.889	0.869	0.889	0.962559	0.0897759	0.825897	0.000119247	0.858023	0.000791584
CSA001555.1	alpha-1,4-glucan-protein synthase	3	3	41.163	44.333	61.2	18	38	7	39.038	63.4	20	40	7	92.378	63.4	20	45	7	1.148	1.142	1.144	1.033	1.116	1.059	0.777	0.672	0.732	0.934188	0.037455	0.635119	0.000163977	0.679863	0.000934441
CSA001567.1	beta-ureidopropionase	3	3	40.938	4.3793	6.6	2	2	2	15.691	9	2	2	2	9.2284	9	2	2	2	1.148	0.883	0.925	0.95	0.988	1.03	0.848	1.175	1.071	1.00406	0.964894	1.04668	0.735035	1.04245	0.693746
CSA001568.1	COPI associated protein	3	3	22.395	6.373	17.3	3	4	3	4.7586	12.7	2	4	2	5.9495	12.7	2	4	2	1.027	0.879	0.756	1.058	0.928	1.126	0.9	1.244	1.201	1.16905	0.198857	1.25657	0.163558	1.07487	0.561486
CSA001570.1	magnesium-dependent phosphatase 1	3	2	19.651	3.388	8.1	1	1	1	4.1734	8.1	1	1	1	3.6877	8.1	1	1	1	0.92		0.935	1.049		1.069	1.058		1.015	1.14178	0.00891519	1.11752	0.0409774	0.978754	0.442829
CSA001574.1	heat shock 70 kDa protein 16	3	3	44.674	9.2915	16.1	6	10	3	10.402	10.4	4	6	1	17.49	15.6	6	11	3	1.079	1.085	1.089	1.052	1.041	1.039	0.834	0.839	0.835	0.962804	0.00126113	0.770981	1.83047e-07	0.800766	1.11374e-06
CSA001575.1	heat shock 70 kDa protein 16-like	3	3	44.116	83.615	16.2	5	6	5	27.335	22.7	8	10	8	82.716	18	6	8	6	1.102	1.127	1.055	1.024	1.026	0.998	0.848	0.796	0.926	0.928136	0.0265966	0.782582	0.00532827	0.843176	0.0148235
CSA001578.1	protein DETOXIFICATION 40-like	1	0	15.334						1.5621	7.5	1	1	1
CSA001582.1	60S ribosomal protein L26-1	2	1	23.592						5.0093	23.6	6	10	1	3.1358	18.3	5	11	1			1.389			0.73			0.753	0.525558		0.542117		1.03151
CSA001594.1	uncharacterized J domain-containing protein C1071.09c	3	3	32.81	5.5924	4.3	1	1	1	6.3903	4.3	1	1	1	6.7152	4.3	1	1	1	0.739	0.85	0.88	1.079	1.111	1.027	1.277	1.088	1.137	1.30296	0.00723332	1.41839	0.00835473	1.08859	0.198423
CSA001599.1	plasma membrane ATPase 4	3	2	22.428	2.8959	27	5	6	1	4.0771	27	6	8	2	4.2374	27	6	10	2	0.674		0.625	1.217		1.309	1.217		1.185	1.94457	0.00713954	1.84911	0.00280337	0.950911	0.33097
CSA001602.1	dirigent protein 6-like	2	2	20.823	7.7582	8.1	1	2	1						4.7338	8.1	1	1	1	1.051		1.06	0.881		0.88	1.059		1.047	0.834202	0.000668716	0.997631	0.770584	1.19591	0.00121601
CSA001608.1	fruit SANT/MYB Binding protein1	1	0	37.3						1.6114	2.4	1	1	1
CSA001609.1	cell division cycle and apoptosis regulator protein 1	3	3	180.08	8.3012	3	5	5	5	17.935	4.3	6	6	6	14.348	3.6	6	6	6	1.688	1.657	1.516	0.668	0.66	0.755	0.406	0.434	0.55	0.428513	0.000110134	0.285949	7.36235e-05	0.667307	0.0125163
CSA001615.1	uncharacterized endoplasmic reticulum membrane protein C16E8.02	3	2	22.228	2.3584	4.6	1	2	1	1.6716	4.6	1	1	1	2.4032	4.6	1	2	1	0.827		0.792	1.142		1.2	1.086		1.072	1.44657	0.00866499	1.33292	0.00485562	0.921435	0.0910227
CSA001619.1	trifunctional UDP-glucose 4,6-dehydratase/UDP-4-keto-6-deoxy-D-glucose 3,5-epimerase/UDP-4-keto-L-rhamnose-reductase RHM1	3	3	75.92	182.45	34.4	24	36	8	214.83	36.1	23	34	10	170.37	35.4	22	32	10	1.41	1.371	1.39	0.936	0.961	0.945	0.462	0.481	0.543	0.681371	5.0292e-06	0.356269	4.88412e-06	0.522871	5.97479e-05
CSA001620.1	alpha,alpha-trehalose-phosphate synthase	3	1	104.9	2.9515	1.9	2	2	2	2.0706	1	1	1	1	4.2546	3.1	3	3	3	1.208			0.755			0.977			0.625		0.808775		1.29404
CSA001629.1	exosome complex exonuclease RRP44 homolog A	1	1	30.958											1.856	10.2	2	3	1			1.003			1.067			0.924	1.06381		0.921236		0.865979
CSA001630.1	Exosome complex exonuclease	3	3	50.762	27.925	15.7	6	8	6	11.722	9.5	3	3	3	25.275	17.5	6	7	6	0.991	1.017	1.003	1.157	1.147	0.985	0.842	0.818	1.004	1.09233	0.174793	0.884756	0.120999	0.809973	0.0613102
CSA001635.1	ABC transporter B family member 2-like isoform X1	3	3	102.87	23.835	10.3	8	10	4	50.016	12.4	10	12	8	34.536	12.3	10	15	5	0.983	1.12	0.965	0.981	1.062	1.016	1.043	0.741	1.032	0.997066	0.958569	0.917862	0.488875	0.920562	0.470068
CSA001636.1	ABC transporter B family member 10-like isoform X1	3	1	18.207	2.9471	6	1	1	1	1.6545	4.8	1	1	1	1.7258	4.8	1	1	1			1.156			1.181			0.59	1.02163		0.510381		0.499577
CSA001649.1	inactive ubiquitin carboxyl-terminal hydrolase 53-like	1	0	31.051											1.5395	3.3	1	1	1
CSA001654.1	rd22-c protein precursor	3	3	31.254	162.37	40.1	10	12	10	231.99	44.9	13	19	13	159.2	38.7	10	11	10	0.984	1.002	0.958	1.315	1.27	1.261	0.683	0.703	0.72	1.30639	0.000138945	0.715353	7.40946e-05	0.547582	8.13922e-06
CSA001657.1	probable prefoldin subunit 3	3	3	33.044	39.292	7.8	2	3	2	72.886	11.9	3	4	2	45.398	11.9	3	4	2	1.219	1.227	1.119	0.983	1.033	0.998	0.715	0.65	0.814	0.845442	0.00826258	0.61122	0.00143577	0.72296	0.00507496
CSA001660.1	(-)-alpha-terpineol synthase	3	2	42.829	1.6244	12.8	4	6	1	1.1147	10.9	4	7	0	1.7406	11.2	4	7	1	0.572		0.497	2.028		2.152	0.482		0.453	3.9102	0.00216286	0.874649	0.237553	0.223684	0.00153652
CSA001664.1	nitroreductase family protein	3	3	72.465	11.476	5.8	3	3	3	8.769	7	4	5	4	6.8858	4.5	3	3	3	0.757	0.823	0.717	0.921	0.904	0.879	1.45	1.349	1.522	1.17719	0.0150577	1.88115	0.00033214	1.598	0.000475854
CSA001665.1	transketolase, chloroplastic	3	3	88.222	124.73	37.1	25	78	8	165.63	37.6	25	75	8	156.7	37	25	82	8	0.719	0.692	0.726	0.85	0.77	0.767	1.539	1.657	1.582	1.11699	0.045713	2.23584	1.65995e-05	2.00168	5.41498e-05
CSA001667.1	elongation factor 1-alpha	3	3	49.307	244.98	54.1	25	102	4	303.49	57.7	27	122	2	317.35	59.5	27	98	4	1.19	1.203	1.207	0.891	0.916	0.894	0.856	0.86	0.83	0.750278	5.78219e-06	0.707222	5.15587e-06	0.942614	0.0135777
CSA001670.1	protein IQ-DOMAIN 1	2	0	70.442						1.4353	3	2	2	2	1.9492	2.7	2	2	2
CSA001675.1	probable DNA helicase MCM8 isoform X1	3	2	40.574	3.6214	2.7	1	1	1	5.0915	2.7	1	1	1	5.6299	2.7	1	1	1		2.028	2.008		0.405	0.41		0.22	0.243	0.201933	4.0962e-05	0.114718	7.27616e-05	0.568098	0.00444144
CSA001678.1	pentatricopeptide repeat-containing protein At3g09650, chloroplastic	1	0	84.161	1.8769	1.9	1	1	1
CSA001679.1	non-lysosomal glucosylceramidase isoform X1	3	1	111.9	4.2996	0.8	2	2	2	9.1344	2.7	2	2	2	4.3087	2.5	2	2	2			1.064			0.989			0.923	0.929511		0.867481		0.933266
CSA001683.1	miraculin	3	3	22.56	5.919	16.3	3	3	3	12.062	16.3	3	3	3	8.4935	16.3	3	3	3	0.79	0.825	0.823	0.804	0.805	0.768	1.502	1.453	1.495	0.974979	0.288809	1.82527	3.88454e-06	1.87211	3.82434e-06
CSA001685.1	clustered mitochondria protein	3	3	28.668	16.28	11.2	2	3	2	26.892	11.2	2	3	2	49.119	17.8	3	4	3	1.25	1.072	1.109	0.95	0.992	0.975	0.708	0.909	0.876	0.850189	0.0368442	0.72661	0.0193054	0.854645	0.0897486
CSA001686.1	clustered mitochondria protein	3	3	166.49	81.076	11.9	16	20	16	102.15	10.8	15	20	15	74.481	13.8	18	21	18	1.259	1.248	1.281	0.961	0.942	0.96	0.663	0.699	0.732	0.755808	1.14991e-05	0.552798	1.40895e-05	0.731401	0.000251882
CSA001687.1	chaperone protein dnaJ GFA2, mitochondrial	1	1	15.834											4.2208	24	3	3	2			0.899			1.083			1.05	1.20467		1.16796		0.969529
CSA001691.1	chaperone protein dnaJ 1, mitochondrial	2	1	17.797	3.3764	15.7	2	2	1	3.8136	15.1	3	3	2						1.264			0.858			0.788			0.678797		0.623418		0.918415
CSA001695.1	protein transport protein Sec61 subunit alpha-like	2	0	54.575	3.6125	17.7	9	18	0						3.9386	23.5	10	22	0
CSA001700.1	basic 7S globulin-like	3	3	46.113	12.822	8.5	3	4	3	66.526	10.4	4	6	4	35.355	8.5	3	5	3	0.91	0.896	0.878	1.097	1.256	1.218	1.005	0.872	0.871	1.33048	0.00375331	1.02385	0.663271	0.769532	0.0137613
CSA001701.1	actin cross-linking protein	1	0	66.889						1.8111	1.8	1	1	1
CSA001704.1	protein PSP2	3	3	22.02	2.1092	3.5	1	1	1	13.35	10	2	2	2	2.7116	3.5	1	1	1	1.027	1.389	1.305	0.809	0.842	1.003	1.169	0.633	0.575	0.713249	0.0463243	0.638807	0.109576	0.895629	0.665778
CSA001705.1	glycine-rich family protein	3	3	31.728	143.73	47.4	10	17	10	212.89	45.6	9	15	9	184.15	50.9	10	18	10	1.203	1.235	1.185	0.924	0.905	0.926	0.76	0.763	0.818	0.76042	5.60758e-05	0.64615	5.71053e-05	0.849728	0.00231587
CSA001715.1	farnesylcysteine lyase	1	0	30.667						1.2304	3.5	1	1	1
CSA001723.1	probable ribose-5-phosphate isomerase 3, chloroplastic	3	3	60.012	156.97	26	10	22	10	180.12	19.9	9	21	9	113.18	19.3	9	22	9	0.423	0.461	0.473	0.944	0.916	0.912	1.83	1.892	1.804	2.04274	1.29501e-05	4.07222	1.32356e-06	1.99351	5.1434e-06
CSA001724.1	E3 ubiquitin-protein ligase UPL1 isoform X1	3	3	410.41	54.124	4.8	15	16	9	60.135	6	20	21	11	40.803	4.7	16	16	11	0.85	0.896	0.873	1.247	1.16	1.218	0.973	0.957	0.957	1.38412	0.000311731	1.10233	0.00335579	0.796414	0.000709115
CSA001725.1	RPM1-interacting protein 4	3	3	10.222	19.61	22.1	1	1	1	27.738	22.1	1	2	1	16.154	22.1	1	1	1	0.973	0.973	0.961	0.983	0.952	0.969	1.056	1.089	1.088	0.998968	0.923751	1.11214	0.000711764	1.11329	0.00145893
CSA001726.1	transmembrane emp24 domain-containing protein p24beta2-like	3	3	17.3	22.637	37.4	4	5	4	26.125	37.4	4	4	4	16.843	23.1	3	3	3	1.188	1.103	1.5	0.92	0.865	0.724	0.826	1.004	0.606	0.661831	0.033292	0.642575	0.0536372	0.970905	0.859629
CSA001728.1	DUF538 family protein	3	3	20.343	9.2917	6.6	1	1	1	6.6868	6.6	1	1	1	6.6317	6.6	1	1	1	0.934	0.79	0.937	1.071	1.166	1.079	1.015	1.111	1.001	1.24615	0.0188887	1.17512	0.0595606	0.943004	0.243098
CSA001731.1	probable caffeoyl-CoA O-methyltransferase At4g26220 isoform X3	3	3	21.513	42.89	22.7	4	5	4	47.985	22.7	4	5	4	32.745	32	5	7	5	0.855	0.87	0.888	0.992	0.979	1.047	1.21	1.203	1.071	1.15499	0.00415451	1.33333	0.00327649	1.15441	0.0355216
CSA001732.1	cytosolic sulfotransferase 15-like	3	3	78.082	10.052	6.4	4	5	4	19.126	15.2	8	13	7	21.036	14.8	7	10	7	1.014	0.915	0.935	1.305	1.27	1.477	0.651	0.731	0.61	1.4148	0.00500127	0.695531	0.00337822	0.491609	0.000718476
CSA001741.1	2-oxoglutarate-Fe(II) type oxidoreductase isoform X3	3	3	20.571	21.151	19.8	2	3	2	29.318	19.8	2	2	2	8.8807	5.5	1	2	1	0.63	0.6	0.714	1.328	1.409	1.209	1.158	1.112	1.169	2.02984	0.000582726	1.76903	0.00020186	0.871515	0.0494858
CSA001747.1	GMP synthase	3	3	59.064	133.25	37.8	16	24	16	284.92	43.3	16	25	16	195.33	41	15	24	15	1.084	1.105	1.076	1.039	1.006	1.032	0.842	0.84	0.856	0.94242	0.00910642	0.777335	1.72402e-05	0.824829	8.92402e-05
CSA001748.1	non-specific lipid-transfer protein 1-like	3	3	12.209	7.2051	11.9	1	2	1	10.088	11.9	1	2	1	10.471	11.9	1	2	1	0.663	0.657	0.565	0.997	0.982	1.03	1.469	1.494	1.569	1.59629	0.000419118	2.40424	3.54785e-05	1.50615	0.00010698
CSA001757.1	catalytic/ coenzyme binding protein	3	3	36.565	115.19	26.5	9	17	9	130.05	31.1	10	19	10	129.66	26.5	8	17	8	0.577	0.584	0.57	0.816	0.828	0.863	1.784	1.761	1.738	1.4483	6.07105e-05	3.05199	1.1323e-07	2.1073	1.14818e-06
CSA001759.1	survival motor neuron protein	3	3	28.236	6.9356	10.3	2	3	2	23.429	10.3	2	3	2	15.057	10.3	2	3	2	1.373	1.355	1.342	0.811	0.805	0.887	0.688	0.763	0.648	0.614988	4.77802e-05	0.515725	4.68029e-05	0.838594	0.0346536
CSA001771.1	sister chromatid cohesion protein PDS5 homolog A-like	1	0	19.82											2.3246	7.9	1	1	1
CSA001775.1	sister chromatid cohesion protein PDS5 homolog B	1	1	34.966	6.8256	6.6	1	1	1											1.075			0.953			0.947			0.886512		0.88093		0.993704
CSA001777.1	phosphoglycolate phosphatase 1B, chloroplastic-like	3	3	41.133	199.18	49.5	15	28	13	175.96	42.2	16	28	14	214.12	50	18	29	16	0.505	0.473	0.443	0.922	0.885	0.923	1.844	1.805	1.874	1.92118	3.70078e-05	3.8867	8.86206e-07	2.02308	2.45249e-06
CSA001780.1	putative metallophosphoesterase At3g03305	2	0	92.898						1.3981	1.3	1	1	1	1.9683	1.1	1	1	1
CSA001785.1	protein PLASTID TRANSCRIPTIONALLY ACTIVE 10 isoform X1	3	3	90.428	16.986	10.7	5	5	5	22.065	14.3	7	7	7	24.607	10.9	5	6	5	0.806	0.768	0.757	1.261	1.207	1.272	0.987	1.097	0.95	1.60446	4.70878e-05	1.30159	0.00732601	0.81123	0.00832577
CSA001786.1	3-oxoacyl-[acyl-carrier-protein] reductase 4 isoform X2	3	3	34.047	54.175	23.1	7	10	7	63.159	32.5	9	14	9	73.417	23.1	7	12	7	1.002	1.054	1.028	0.994	0.945	0.978	0.988	0.942	0.956	0.94585	0.0555859	0.935798	0.031173	0.989373	0.629909
CSA001794.1	mitochondrial fission 1 protein A-like	3	3	23.784	9.9459	27.4	4	8	2	10.956	33.8	5	8	2	11.055	25.6	4	7	2	1.003	0.89	0.963	0.943	0.909	0.974	1.12	1.15	1.043	0.989496	0.805603	1.16001	0.0294755	1.17233	0.0117886
CSA001805.1	probable receptor protein kinase TMK1	2	2	108.1	1.3382	2.3	2	3	1						8.1605	3.4	3	4	1	1.119		1.202	1.019		1.035	0.815		0.683	0.884963	0.0873008	0.645411	0.0340715	0.729309	0.0527106
CSA001815.1	LOW QUALITY PROTEIN: acetyl-CoA acetyltransferase, cytosolic 1-like	3	3	41.35	125.92	49.1	13	23	10	207.07	62.2	15	29	11	141.12	62.2	15	28	11	0.811	0.864	0.854	1.231	1.162	1.18	1.029	1	0.937	1.41281	0.000188304	1.1728	0.0100136	0.830115	0.0040546
CSA001818.1	indole-3-glycerol phosphate synthase, chloroplastic	3	3	44.245	205.61	45.7	18	30	18	323.31	54.3	19	32	19	217.26	46.7	17	33	17	0.788	0.845	0.788	1.066	1.089	1.077	1.195	1.169	1.185	1.33499	0.000177754	1.46592	5.15141e-05	1.09808	0.000466657
CSA001820.1	mitochondrial outer membrane protein porin of 34 kDa	3	3	29.484	295.12	59.8	14	33	10	205.24	48.2	13	34	9	262.86	59.8	13	35	10	0.894	0.9	0.923	0.962	0.981	0.954	1.171	1.146	1.138	1.06625	0.00732754	1.27162	5.02801e-05	1.19261	0.000128935
CSA001821.1	hypersensitive-induced response protein 2	3	0	25.099	2.2542	35.5	8	23	1	2.038	35.5	8	24	1	2.792	35.5	8	23	1
CSA001822.1	tudor domain-containing protein 3	1	0	19.962	1.3928	3.8	1	1	1
CSA001823.1	tudor domain-containing protein 3	2	1	18.361	2.8428	10	1	1	1	2.4093	10	1	1	1							1.129			0.962			0.862		0.852081		0.763508		0.89605
CSA001826.1	nuclear pore complex protein NUP62	3	3	17.381	50.297	61.4	7	8	7	57.125	37.9	5	7	5	53.47	56.2	6	8	6	1.224	1.172	1.156	0.952	0.947	0.97	0.807	0.833	0.862	0.807714	0.000465094	0.704392	0.00017499	0.872081	0.00213455
CSA001831.1	glucose-6-phosphate 1-dehydrogenase, cytoplasmic isoform	3	3	59.218	77.447	31.9	15	23	9	96.18	34.4	17	26	9	93.647	30.9	16	25	9	0.968	0.993	1.051	1.038	1.004	1.001	0.889	0.938	0.851	1.01029	0.724252	0.88911	0.0340649	0.880053	0.0119614
CSA001833.1	glyceraldehyde-3-phosphate dehydrogenase, cytosolic-like	3	3	122.87	84.827	19.6	18	59	6	90.15	18.9	17	61	6	323.31	20.7	19	62	7	1.086	0.985	1.02	1.031	0.947	1.032	0.749	0.917	0.938	0.973795	0.544941	0.842446	0.071791	0.865116	0.11005
CSA001834.1	prohibitin-3, mitochondrial	3	3	30.691	155.07	40.8	8	13	3	81.946	44	9	16	4	114.36	44.7	9	15	5	0.856	0.851	0.84	1.141	1.156	1.208	1.053	1.031	0.979	1.37613	0.000105878	1.20259	0.00155802	0.873894	0.00787794
CSA001835.1	54S ribosomal protein L37, mitochondrial	3	3	14.78	6.4598	18.8	2	2	2	11.881	18.8	2	2	2	8.2988	18.8	2	2	2	1.399	1.064	0.924	0.972	0.907	0.784	0.478	1.012	1.338	0.786242	0.185968	0.834957	0.55232	1.06196	0.8408
CSA001839.1	ankyrin repeat protein	2	2	22.023	21.704	18.3	3	3	3	31.736	24.4	4	5	4						1.321	1.385		0.915	0.945		0.602	0.528		0.687361	0.00690817	0.417591	0.00383167	0.607527	0.0117542
CSA001841.1	putative serine/threonine-protein kinase dyrk2	3	3	133.26	6.6363	2.3	3	4	3	5.1538	2.2	3	3	3	6.7845	2.9	4	5	4	1.198	1.268	1.238	0.859	0.856	0.867	0.878	0.857	0.74	0.697084	5.3503e-05	0.668197	0.000991881	0.958559	0.454016
CSA001846.1	probable cyclic nucleotide-gated ion channel 20, chloroplastic isoform X1	3	3	18.356	1.4762	6.5	1	1	1	1.3384	6.5	1	1	1	1.5269	6.5	1	2	1	0.765	0.786	0.801	1.191	1.145	1.187	1.12	1.139	1.073	1.49787	2.699e-05	1.41667	0.000124599	0.945785	0.0602674
CSA001848.1	retinol dehydrogenase 11-like	3	2	10.631	9.9671	23.2	1	2	1	9.7966	23.2	1	2	1	10.553	23.2	1	2	1	1.362	1.118		0.878	1.021		0.631	0.814		0.765726	0.176306	0.582661	0.07695	0.760927	0.189792
CSA001855.1	homeobox protein knotted-1-like 13 isoform X1	2	0	54.615						2.0162	6.7	3	4	1	1.9075	8.2	4	5	0
CSA001859.1	trafficking protein particle complex II-specific subunit 120 homolog isoform X2	3	3	132.79	62.481	12.4	11	12	11	96.526	13.4	13	16	13	60.355	13.9	13	16	13	1.175	1.198	1.206	0.999	1.01	1.029	0.76	0.721	0.676	0.84884	0.000146026	0.602682	5.314e-05	0.710007	0.00033991
CSA001864.1	heat shock protein 90-5, chloroplastic	3	3	92.311	323.31	61.6	45	100	39	323.31	62.1	44	114	39	323.31	62.3	46	100	41	0.77	0.763	0.761	1.432	1.434	1.444	0.877	0.844	0.871	1.87881	1.32471e-08	1.1299	0.000698758	0.601392	7.58986e-07
CSA001869.1	protein S-acyltransferase 24	3	3	17.478	4.9929	9	1	1	1	7.4585	9	1	1	1	5.6462	9	1	2	1	1.01	1.053	1.017	0.861	0.893	0.953	1.136	1.042	1.028	0.878896	0.0144469	1.04091	0.313172	1.18434	0.0184695
CSA001876.1	pectinesterase	1	0	69.632											1.756	2.3	1	1	1
CSA001884.1	heterogeneous nuclear ribonucleoprotein R-like isoform X2	1	0	60.715											1.4426	2	1	1	1
CSA001888.1	cytochrome P450 84A1-like	3	0	34.879	3.754	5.5	1	1	1	6.3938	5.5	1	1	1	4.519	5.5	1	1	1
CSA001890.1	uncharacterized isomerase BH0283 isoform X3	3	3	33.412	57.007	14.9	4	6	4	70.348	19.8	5	6	5	83.095	20.8	5	7	5	1.182	1.235	1.12	0.749	0.757	0.824	0.961	0.896	0.964	0.65875	0.000596806	0.797569	0.00394648	1.21073	0.00731911
CSA001892.1	exocyst complex component SEC6	2	1	8.4764						3.684	19.5	1	1	1	11.931	19.5	1	1	1			0.916			1.103			1.005	1.20415		1.09716		0.911151
CSA001908.1	17.3 kDa class I heat shock protein-like	3	3	18.223	29.777	35.8	9	26	3	10.069	46.5	10	19	2	32.552	40.9	10	21	3	0.744	0.745	0.729	0.412	0.485	0.429	1.954	1.904	1.996	0.597836	0.000194527	2.63931	1.49264e-06	4.41478	1.64097e-06
CSA001919.1	photosystem I-related protein TAB2	2	1	60.658	2.9757	5.2	2	2	1	10.516	5.6	2	3	2							0.721			1.013			1.36		1.40499		1.88627		1.34255
CSA001928.1	mediator of RNA polymerase II transcription subunit 25-like isoform X3	1	1	17.943						9.0805	8.4	1	1	1							1.153			0.975			0.815		0.84562		0.706852		0.835897
CSA001929.1	mediator of RNA polymerase II transcription subunit 25	1	1	60.813											12.773	10	5	5	5			1.081			0.969			0.921	0.896392		0.851989		0.950464
CSA001934.1	plant/F7F23-4 protein	3	3	45.131	9.5277	12.4	4	4	4	4.9504	5.1	2	2	2	5.4967	5.1	2	2	2	0.848	0.864	0.822	1.251	1.28	1.182	0.939	0.885	1.05	1.46527	0.000238463	1.13418	0.0864222	0.774037	0.00781154
CSA001942.1	protein PLASTID TRANSCRIPTIONALLY ACTIVE 12	1	0	37.428						1.5486	3.3	1	1	1
CSA001943.1	Sel1-like repeats-containing protein	1	0	34.094	3.5362	5.6	1	1	1
CSA001944.1	UBP1-associated protein 2C isoform X2	3	2	36.58	1.7457	2.4	1	1	1	1.3469	2.4	1	1	1	4.2433	5.4	2	2	2	1.01	0.999		1.085	1.044		0.894	0.954		1.05973	0.105672	0.919861	0.118559	0.868013	0.0608413
CSA001953.1	WD-40 repeat-containing protein MSI1	3	3	40.386	14.817	11.6	3	3	3	33.917	14.1	4	6	2	30.11	19.8	5	5	2	1.167	1.218	1.221	0.963	0.933	0.928	0.809	0.77	0.773	0.783139	0.000226766	0.652246	4.1575e-05	0.832861	0.000695701
CSA001957.1	fruit protein pKIWI502	3	3	33.833	95.698	23.1	7	16	6	70.589	27.9	8	18	6	57.973	27.9	7	17	5	0.533	0.591	0.575	1.108	1.101	1.128	1.53	1.476	1.476	1.9641	8.89971e-06	2.63802	3.13055e-06	1.34312	4.21312e-05
CSA001960.1	ATP synthase subunit beta, mitochondrial-like	3	3	56.06	169.56	65.2	22	73	7	192.14	65.2	22	70	7	122.57	65.2	21	72	7	0.921	0.92	0.931	0.979	0.942	0.969	1.132	1.129	1.088	1.04257	0.0274726	1.20815	0.00019289	1.15882	0.00104782
CSA001967.1	2,3-bisphosphoglycerate-independent phosphoglycerate mutase-like	1	1	62.871	21.21	9.7	5	7	2											1.066			1.004			0.904			0.941839		0.84803		0.900398
CSA001971.1	AT-rich interactive domain-containing protein 6-like isoform X1	1	0	8.9093						2.3855	25.6	1	1	1
CSA001972.1	AT-rich interactive domain-containing protein 5-like isoform X2	3	3	64.732	15.127	8.6	4	4	4	17.088	6.9	3	3	3	31.483	8.6	4	5	4	1.025	1.064	1.187	0.974	1.002	0.929	0.933	0.893	0.824	0.886752	0.0809089	0.808913	0.0231578	0.91222	0.0905789
CSA001981.1	NECAP-like protein CG9132	3	1	14.097	21.787	21.4	1	1	1	5.7483	18.3	2	2	2	6.6638	25.2	3	3	3	1.164			0.889			0.892			0.763746		0.766323		1.00337
CSA001985.1	protein transport protein Sec61 subunit alpha-like	3	3	55.14	21.844	19.7	9	17	2	59.406	24.7	11	20	2	40.524	24.7	11	22	2	1.09	1.069	0.96	1.034	1.043	0.996	0.839	0.858	1.061	0.985252	0.738194	0.884258	0.214665	0.897494	0.221064
CSA001990.1	anamorsin homolog isoform X3	3	3	27.85	40.155	12.4	2	3	2	50.655	12.4	2	3	2	32.538	6	1	2	1	1.109	1.121	1.198	1.006	1.051	0.949	0.842	0.777	0.781	0.876896	0.0257096	0.700117	0.000604967	0.798403	0.00507707
CSA001999.1	SEC1 family transport protein SLY1-like	3	3	68.981	218.22	34.8	17	21	17	274.37	36.5	17	21	17	260.93	41.9	19	25	19	1.168	1.112	1.076	1.009	1.012	1.04	0.773	0.792	0.815	0.912098	0.0261304	0.709178	0.000378864	0.777524	0.000131326
CSA002001.1	Cytochrome P450 87A3	1	0	47.483											2.3474	4.6	2	2	2
CSA002002.1	metal-independent phosphoserine phosphatase isoform X2	3	3	26.217	11.646	13.2	2	2	2	29.4	20	3	3	3	8.8313	7.7	1	1	1	1.167	1.243	1.181	0.974	0.974	1.032	0.797	0.692	0.715	0.829852	0.00255641	0.613757	0.000304903	0.739597	0.00226406
CSA002007.1	structural maintenance of chromosomes domain-containing protein isoform X1	3	3	34.696	12.062	16	4	8	4	20.617	25.2	7	13	5	12.461	17.6	4	7	4	1.162	1.115	1.146	0.935	1.01	0.903	0.878	0.838	0.912	0.832019	0.00518138	0.767748	0.000480429	0.922753	0.127653
CSA002012.1	mitogen-activated protein kinase 19 isoform X3	3	0	17.413	3.8642	7.2	1	1	1	3.5058	7.2	1	1	1	3.4254	7.2	1	1	1
CSA002013.1	probable acyl-activating enzyme 5, peroxisomal	3	3	60.32	78.482	17.1	6	9	6	48.215	11.4	6	9	6	116.76	20	8	12	8	1.205	1.211	1.166	1.216	1.248	1.29	0.4	0.396	0.424	1.04802	0.089125	0.340592	1.18113e-06	0.324987	3.36394e-06
CSA002017.1	GTP-binding family protein	3	2	17.237	26.39	63.6	7	12	2	53.429	68.8	8	16	3	34.402	63.6	7	13	2	0.912	1.163		1.116	1.032		0.997	0.74		1.03518	0.808585	0.837108	0.446083	0.808659	0.267856
CSA002021.1	30S ribosomal protein S13, chloroplastic	3	2	18.705	13.342	23.4	4	6	4	14.56	24	4	6	4	9.2541	13.2	2	3	2	1.064	1.098		1.18	1.155		0.756	0.684		1.08002	0.054673	0.66605	0.0119448	0.616702	0.00717401
CSA002026.1	nucleoside diphosphate kinase 1	3	3	16.444	35.454	36.5	6	14	3	132.45	68.2	8	18	5	34.152	52	7	13	4	1.194	1.158	1.191	0.951	0.936	0.931	0.61	0.853	0.77	0.795371	4.93504e-05	0.630257	0.00377812	0.792406	0.0527253
CSA002030.1	TIP41-like protein isoform X1	3	3	36.197	14.322	23.8	6	9	6	8.8196	12.7	3	5	3	18.789	22.5	6	6	6	1.12	1.069	1.061	0.923	0.938	0.943	0.917	0.972	0.944	0.862769	0.00156801	0.871692	0.00466574	1.01034	0.59954
CSA002032.1	UDP-arabinopyranose mutase 3	3	2	40.377	2.3068	43.3	13	25	1	22.446	45.2	15	28	2	26.199	37.9	13	30	2		1.17	1.276		0.896	0.864		0.877	0.765	0.719542	0.0250763	0.6713	0.0348744	0.932955	0.417665
CSA002034.1	acetyl-CoA-benzylalcohol acetyltransferase-like	1	0	49.702						3.777	1.6	1	1	1
CSA002038.1	fimbrin-5-like	1	0	74.813	1.9513	1.5	1	1	1
CSA002051.1	peroxisome biogenesis protein 3-2	1	0	42.137						1.7107	4.3	1	1	1
CSA002052.1	guanine nucleotide-binding protein subunit beta-like protein	3	3	35.92	323.31	63.6	15	42	9	323.31	65.7	16	44	10	323.31	59.9	15	41	9	1.112	1.221	1.133	0.97	0.959	0.986	0.859	0.746	0.755	0.841027	0.00586467	0.6809	0.00170848	0.809605	0.00756045
CSA002064.1	aspartic proteinase Asp1 isoform X1	1	0	53.116	2.3379	3.1	1	1	1
CSA002065.1	atp1 gene product (mitochondrion)	3	3	55.278	31.728	2.5	1	9	1	23.914	3.9	2	6	1	5.9723	3.9	2	9	1	0.604	0.562	0.786	0.956	1.015	0.935	1.588	1.589	1.371	1.48873	0.0119832	2.32992	0.00097773	1.56504	0.00200496
CSA002067.1	Mitochondrial import inner membrane translocase subunit Tim17/Tim22/Tim23 family protein	2	2	47.334						1.3674	1.9	1	1	1	1.8445	4.2	2	3	2		1.257	1.201		0.947	0.939		0.702	0.787	0.76729	0.00963924	0.605777	0.0108552	0.789502	0.0432679
CSA002068.1	Tim17/Tim22/Tim23/Pmp24 family protein	1	0	17.65						1.2318	6.9	1	1	1
CSA002074.1	Armadillo btb protein 1	1	0	65.612	4.0069	4.2	2	2	2
CSA002081.1	N-alpha-acetyltransferase 16, NatA auxiliary subunit-like isoform X4	1	1	20.416											1.8528	21.5	5	6	1			1.11			1.027			0.819	0.925225		0.737838		0.797468
CSA002083.1	acetyltransferase-related family protein	3	3	82.228	79.993	33.9	22	27	15	64.65	28.4	18	27	13	52.173	30.3	20	27	16	1.248	1.26	1.287	1.047	1.026	1.023	0.608	0.564	0.581	0.81581	7.18074e-05	0.461924	2.45695e-06	0.566214	7.25046e-06
CSA002086.1	phosphatidate phosphatase PAH1 isoform X2	3	3	116.06	9.2421	3.3	3	3	3	5.9916	4.1	4	4	4	7.4613	4.1	4	4	4	1.073	1.071	1.04	0.914	0.971	0.963	0.992	0.933	0.985	0.894472	0.00572501	0.913945	0.0130913	1.02177	0.467412
CSA002087.1	protein MLP1 isoform X2	3	3	77.129	1.6522	1.2	1	2	1	2.5158	3.4	3	3	3	3.7182	3.4	3	4	3	0.754	0.834	0.735	1.105	0.918	0.952	1.227	1.164	1.288	1.28067	0.0287667	1.58373	0.000649358	1.23664	0.0257201
CSA002089.1	ankyrin repeat-containing protein At5g02620	2	0	57.946	1.8019	2.8	1	1	1	3.9919	2.8	1	1	1
CSA002091.1	ankyrin repeat-containing protein At3g12360-like	1	1	22.528											-2	5.2	1	1	1			0.52			0.714			1.973	1.37308		3.79423		2.76331
CSA002099.1	DAG protein, chloroplastic	3	3	27.35	110.45	33.3	7	16	6	126.18	36.2	8	15	7	84.405	36.2	8	18	7	0.736	0.743	0.722	1.452	1.365	1.263	0.953	0.907	1.084	1.8537	0.000338289	1.33757	0.00973704	0.721569	0.00762696
CSA002108.1	carbonic anhydrase 2 isoform X1	3	3	35.791	323.31	75.5	21	135	19	323.31	75.5	21	117	19	323.31	70	20	126	18	0.361	0.343	0.371	0.992	1.031	1.047	1.815	1.829	1.782	2.85581	3.40319e-06	5.04744	9.24572e-08	1.76743	3.33401e-06
CSA002109.1	proteasome assembly chaperone 3 isoform X1	3	0	13.511	2.6188	8.1	1	2	1	2.9385	8.1	1	2	1	3.7406	8.1	1	2	1
CSA002117.1	multiprotein-bridging factor 1c	3	2	16.052	3.6806	14.5	2	2	2	6.5865	27.6	4	4	4	5.1684	20	3	3	3		0.602	0.59		0.873	0.849		1.688	1.73	1.44463	0.00255338	2.86745	0.000384837	1.9849	0.000812521
CSA002120.1	shaggy-related protein kinase theta	1	0	52.713						1.2934	3.2	2	2	1
CSA002124.1	probable plastid-lipid-associated protein 3, chloroplastic	3	3	42.865	24.5	14.4	6	8	6	17.771	14.4	5	6	5	15.643	16.7	7	10	7	0.838	0.512	0.88	0.972	0.942	0.976	1.27	1.739	1.186	1.29596	0.13272	1.88117	0.0343807	1.45156	0.0651189
CSA002127.1	anthocyanidin reductase ((2S)-flavan-3-ol-forming)-like isoform X2	3	3	37.671	64.318	11.2	3	6	3	101.7	11.2	3	5	3	42.96	8.8	2	3	2	0.757	0.774	0.756	1.015	1.124	1.111	1.243	1.209	1.218	1.42108	0.000773169	1.60472	2.50283e-06	1.12923	0.0174576
CSA002130.1	calcyclin-binding protein	3	3	23.911	69.044	35.7	8	16	8	79.449	39	9	18	9	15.694	27.2	7	14	7	1.341	1.357	1.341	0.792	0.768	0.826	0.755	0.741	0.695	0.59074	6.27553e-06	0.542461	5.27444e-06	0.918273	0.0582824
CSA002131.1	KAT8 regulatory NSL complex subunit 3 isoform X2	3	2	12.78	6.079	10.9	1	1	1	12.719	10.9	1	1	1	22.476	10.9	1	2	1	1.549	1.462		0.711	0.758		0.552	0.622		0.487878	0.00408707	0.389904	0.00367464	0.799183	0.0728724
CSA002132.1	KAT8 regulatory NSL complex subunit 3	2	2	18.249	1.9331	6	1	1	1						2.1856	6	1	1	1	1.752		1.561	0.596		0.721	0.394		0.525	0.397525	0.0128276	0.277392	0.0092302	0.697798	0.159026
CSA002134.1	katanin p60 ATPase-containing subunit A-like 2 isoform X1	1	0	49.015											1.3966	1.8	1	1	1
CSA002135.1	30S ribosomal protein S6 alpha, chloroplastic	3	3	13.641	3.2373	8.1	1	3	1	2.4399	8.1	1	2	1	3.6196	8.1	1	3	1	0.889	0.792	0.848	1.101	1.204	1.154	1.044	1.067	1.044	1.36773	0.00162824	1.24753	0.00201287	0.912113	0.0299426
CSA002137.1	CDP-diacylglycerol--serine O-phosphatidyltransferase 1 isoform X4	1	0	17.613						4.0285	8.6	1	1	1
CSA002143.1	phosphoinositide phospholipase C 6-like	3	3	43.5	13.779	7.7	2	3	2	19.337	8.2	3	3	3	18.776	9.9	4	5	4	1.011	1.464	1.403	0.844	0.855	0.857	1.153	0.515	0.597	0.659103	0.0360963	0.584064	0.0937497	0.88615	0.653738
CSA002144.1	glucan endo-1,3-beta-glucosidase 6	3	3	13.125	7.4645	19	2	4	2	14.273	26.4	3	4	3	7.1335	19	2	3	2	1.167	1.302	1.188	1.016	0.955	1.039	0.755	0.63	0.697	0.823079	0.0115633	0.569319	0.000689271	0.691694	0.0021495
CSA002145.1	glucan endo-1,3-beta-glucosidase 6	3	3	44.433	48	26.8	9	11	9	32.612	25.9	9	11	8	76.596	28.6	10	13	9	1.161	1.149	1.141	1	1.046	1.009	0.821	0.772	0.792	0.885251	0.000974615	0.691104	2.07227e-05	0.780687	0.000366883
CSA002153.1	pyridoxamine 5'-phosphate oxidase family protein	3	3	50.272	71.704	28.5	8	13	8	123.25	25	8	14	8	121.67	22.1	8	12	8	1.051	1.035	1.052	0.935	1.006	0.994	0.971	0.959	0.917	0.935309	0.0402935	0.907266	0.00494108	0.970017	0.344291
CSA002156.1	chaperonin CPN60-like 2, mitochondrial	3	3	61.809	10.186	13	8	9	6	7.7205	9.6	6	6	4	10.628	9.6	6	6	4	1.072	1.059	1.029	1.044	1.055	1.103	0.853	0.859	0.907	1.01329	0.561523	0.828797	0.00106853	0.817926	0.00145477
CSA002157.1	putative pentatricopeptide repeat-containing protein At1g17630	1	1	81.295											-2	1.9	1	1	1			1.048			1.03			0.901	0.982824		0.859733		0.874757
CSA002159.1	kelch repeat-containing protein At3g27220 isoform X2	2	1	55.274	7.4997	5.1	2	2	2						14.537	7.9	3	3	3	1.179			0.99			0.763			0.839695		0.647159		0.770707
CSA002160.1	uncharacterized membrane protein At1g16860-like	3	3	51.748	21.296	18	6	7	5	15.331	13.8	5	6	3	12.373	12.2	5	6	3	1.274	1.367	1.214	1.011	0.954	0.968	0.598	0.542	0.73	0.76083	0.00298544	0.485084	0.000750874	0.637572	0.00370537
CSA002162.1	M-phase phosphoprotein 6	2	2	27.915						1.9796	3.6	1	1	1	3.6978	9.3	2	2	2		1.136	1.324		1.013	0.971		0.797	0.584	0.806504	0.132092	0.561382	0.0628605	0.696069	0.108864
CSA002165.1	mediator of RNA polymerase II transcription subunit 9	2	0	10.442						1.9403	22.8	2	2	2	2.3887	14.1	1	1	1
CSA002166.1	ras-related protein RABE1a-like	3	1	25.718	31.047	52.8	10	19	2	16.767	48.1	10	12	2	15.924	48.1	10	13	2			1.208			0.816			0.92	0.675497		0.761589		1.12745
CSA002169.1	nitrilase-like protein 2	3	3	8.7729	162.2	24.1	1	2	1	153.2	24.1	1	2	1	163.32	24.1	1	2	1	0.947	0.956	0.953	1.091	1.093	1.088	0.976	0.961	0.97	1.14566	1.34287e-06	1.01786	0.028998	0.888447	1.20884e-05
CSA002170.1	nitrilase-like protein 2	3	3	28.301	25.647	30.7	8	14	8	37.283	35.6	10	18	10	22.044	31	8	14	8	0.998	0.956	1.026	1.045	1.052	1.066	0.961	0.953	0.878	1.06141	0.0454892	0.936913	0.133469	0.882706	0.0103729
CSA002171.1	CDP-diacylglycerol--glycerol-3-phosphate 3-phosphatidyltransferase 2-like	1	0	30.55											1.8323	7.1	2	2	2
CSA002173.1	protein DETOXIFICATION 45, chloroplastic-like	1	1	24.334						-2	12.6	2	2	2							0.699			1.183			1.219		1.69242		1.74392		1.03043
CSA002176.1	nucleolar complex protein 4 homolog isoform X1	1	1	20.812	3.554	6.6	1	1	1											1.519			0.742			0.559			0.488479		0.368005		0.753369
CSA002180.1	ubiquitin fusion degradation protein 1 homolog isoform X2	3	3	35.484	3.6375	12.3	4	6	2	3.059	8.5	3	5	1	3.713	12.3	4	7	2	1.104	1.15	1.108	1.218	1.199	1.25	0.621	0.579	0.581	1.09072	0.00828865	0.529744	1.25464e-05	0.485683	6.36773e-06
CSA002183.1	ATP-dependent zinc metalloprotease FTSH 10, mitochondrial-like isoform X1	2	2	77.595						25.243	16	10	11	2	16.584	9.8	7	10	1		1.068	1.064		1.202	1.153		0.687	0.746	1.1046	0.0453246	0.672139	0.00708124	0.608493	0.00684832
CSA002192.1	polyadenylate-binding protein 1-like isoform X2	2	2	7.1877						5.0603	33.9	3	4	1	17.495	33.9	3	5	1		1.371	1.458		0.533	0.528		0.991	0.876	0.375044	0.00242062	0.659951	0.0217392	1.75966	0.0197925
CSA002193.1	RNA-binding protein 42 isoform X1	3	2	20.107	2.1653	4.6	1	2	1	2.4253	4.6	1	1	1	1.9455	4.6	1	1	1	0.969	1.126		0.76	0.626		1.302	1.23		0.661575	0.0753064	1.20859	0.127108	1.82684	0.0171671
CSA002194.1	RNA-binding protein 42-like	1	0	16.074						1.7857	7.4	1	1	1
CSA002197.1	probable arabinose 5-phosphate isomerase	3	3	39.091	6.5524	8.1	3	3	3	3.8244	6.4	2	2	2	3.6268	3.9	1	1	1	1.535	1.761	1.497	0.723	0.65	0.787	0.559	0.326	0.542	0.450657	0.000657762	0.297726	0.000546979	0.660648	0.0449494
CSA002200.1	probable low-specificity L-threonine aldolase 1	3	3	43.354	11.062	4	1	1	1	13.217	9.9	2	2	2	11.447	11.4	3	3	3	1.116	0.963	1.006	0.999	0.997	0.996	0.841	1.054	0.997	0.969854	0.533631	0.937439	0.457357	0.966578	0.628265
CSA002204.1	UDP-glucose 6-dehydrogenase 1-like	3	3	52.965	35.891	34.6	13	22	5	61.16	38.3	13	25	4	38.958	37.7	15	23	5	1.465	1.284	1.398	0.766	0.893	0.797	0.423	0.649	0.503	0.592235	0.000985452	0.379793	0.00053545	0.641287	0.018409
CSA002209.1	LYR motif-containing protein 4	3	3	10.416	66.227	34.8	3	3	3	51.642	26.1	2	2	2	73.179	26.1	2	2	2	0.936	0.949	0.926	0.971	0.929	0.949	1.12	1.147	1.157	1.01352	0.411744	1.21807	9.28706e-05	1.20183	0.000307087
CSA002210.1	tropinone reductase homolog	1	1	16.46											4.3347	10.6	2	2	2			1.574			0.68			0.552	0.43202		0.350699		0.811765
CSA002211.1	transcription factor UNE12-like	3	3	31.387	4.8669	8.6	2	3	1	3.698	8.6	2	5	2	2.7544	8.6	2	4	1	1.205	1.244	1.305	0.82	0.818	0.787	0.91	0.859	0.808	0.645978	0.000139264	0.686468	0.000691627	1.06268	0.181064
CSA002212.1	calcium sensing receptor, chloroplastic	3	3	42.319	309.15	35.8	12	17	12	234.72	38.3	12	20	12	293.38	35.5	11	19	11	0.64	0.639	0.633	0.795	0.816	0.833	1.695	1.711	1.773	1.27824	9.31514e-05	2.70868	1.38434e-06	2.11907	4.07165e-06
CSA002213.1	serpin-ZX-like	2	2	20.295						2.654	20.8	3	7	1	2.5589	20.8	3	8	1		1.108	1.098		0.946	0.931		0.909	0.94	0.850861	0.0029891	0.838169	0.00822236	0.985083	0.501587
CSA002215.1	DUF2365 family protein	3	2	18.874	14.482	18.4	2	2	2	18.974	9.8	1	2	1	6.7212	18.4	2	2	2		0.99	1.01		0.971	0.918		1.045	1.075	0.9445	0.189133	1.06	0.079642	1.12229	0.0630095
CSA002220.1	60S ribosomal protein L14-1	3	3	15.313	64.928	48.9	8	18	5	66.45	48.9	8	19	5	68.653	48.9	8	15	5	1.345	1.43	1.303	1.017	1.005	1.051	0.554	0.432	0.527	0.753556	0.00109225	0.371015	8.36688e-05	0.492353	0.0001919
CSA002228.1	UDP-glucose 4-epimerase GEPI48	3	3	31.78	26.011	40.8	9	14	5	26.114	29.8	6	8	3	27.852	38.1	8	12	5	1.397	1.351	1.258	0.945	0.986	0.978	0.544	0.53	0.651	0.726161	0.00102704	0.430604	0.0001699	0.592987	0.000604754
CSA002229.1	rubredoxin family protein	3	3	30.786	76.241	24.8	5	9	5	31.811	21	5	10	5	79.775	27.2	7	14	7	0.501	0.503	0.47	0.952	0.947	0.911	1.703	1.755	1.841	1.90638	1.19231e-05	3.59498	6.77233e-06	1.88577	3.96982e-05
CSA002231.1	polypyrimidine tract-binding protein homolog 3 isoform X1	3	3	49.324	70.591	24.4	7	11	7	82.531	15.1	5	7	5	83.398	19.6	6	9	5	1.037	1.012	1.04	1.122	1.076	1.096	0.844	0.869	0.768	1.06636	0.0129511	0.803173	0.00305154	0.753188	0.00122079
CSA002232.1	protein LIKE COV 2-like	1	1	8.697						1.9023	11.7	1	1	1							1.291			0.994			0.604		0.769946		0.467854		0.607646
CSA002234.1	probable xyloglucan glycosyltransferase 5	1	0	79.029	2.2249	1.3	1	1	1
CSA002241.1	protein CWC15 homolog	1	0	9.4006	1.763	10.3	1	1	1
CSA002246.1	betaine aldehyde dehydrogenase 1, chloroplastic-like	3	3	54.336	323.31	41.6	15	28	15	323.31	40.2	15	29	15	281.27	38.6	15	27	15	1.122	1.128	1.086	1.012	0.998	0.985	0.85	0.798	0.86	0.897782	0.00173404	0.751799	0.000289164	0.837396	0.00143828
CSA002247.1	mannose-1-phosphate guanyltransferase alpha	3	2	48.71	54.102	25.2	7	10	4	3.1298	16.1	5	7	2	93.764	23.4	6	8	3	0.952		1.054	0.988		1.009	1.102		0.938	0.995513	0.939004	1.01695	0.876471	1.02153	0.819134
CSA002248.1	anaphase-promoting complex subunit 8	2	1	67.196						5.1143	5.9	4	5	4	1.5242	1.7	1	1	1		1.124			0.864			0.976		0.768683		0.868327		1.12963
CSA002250.1	luc7-like protein 3 isoform X1	1	0	38.779						1.5153	4.7	1	1	1
CSA002275.1	BEACH domain-containing protein B isoform X1	3	2	33.694	2.6673	10.3	2	2	2	12.881	13	3	3	3	21.555	13	3	3	3		1.018	0.986		0.98	1.003		0.997	1.016	0.989521	0.647395	1.00449	0.831444	1.01513	0.420499
CSA002277.1	BEACH domain-containing protein B isoform X1	3	2	189.08	12.897	3.6	5	6	5	1.5514	0.5	1	1	1	7.0447	1.3	2	2	2	0.879		0.918	1.224		1.091	0.926		1.015	1.28826	0.0647198	1.08013	0.276555	0.838445	0.144449
CSA002280.1	PLASMODESMATA CALLOSE-BINDING PROTEIN 5-like	3	3	16.493	2.7793	6.5	1	1	1	4.5717	11.7	2	2	2	3.8551	11.7	2	2	2	1.439	1.434	1.418	0.778	0.786	0.751	0.632	0.63	0.69	0.539501	7.36935e-07	0.454906	2.94979e-06	0.843197	0.00563383
CSA002282.1	GTP-binding protein TypA/BipA homolog	3	3	48.347	23.109	16.6	6	7	6	27.86	12	4	6	4	24.995	18.8	7	8	7	1.195	1.235	1.2	0.981	1.028	1.023	0.749	0.705	0.688	0.835262	0.00051664	0.590083	2.33626e-05	0.706464	0.000226827
CSA002284.1	ras-related protein RABA1f	3	3	24.027	54.056	57.1	13	27	3	30.445	51.2	12	26	1	14.068	57.1	12	28	3	1.39	1.441	1.279	0.882	0.854	0.882	0.591	0.548	0.688	0.636983	0.000519124	0.444526	0.000273702	0.697861	0.00341695
CSA002285.1	basic leucine zipper 61-like	3	0	34.177	2.3962	2.6	1	1	1	1.6709	2.6	1	1	1	2.9325	2.6	1	1	1
CSA002294.1	cyclin-dependent kinases regulatory subunit 1	1	1	10.639	6.8386	48.9	5	7	1											1.588			0.617			0.599			0.388539		0.377204		0.970827
CSA002298.1	pre-mRNA-processing factor 19	3	3	56.779	68.688	23.7	11	14	8	45.417	23.7	11	19	8	38.86	23.1	11	15	8	1.02	1.08	1.122	0.976	1.035	1.073	0.834	0.766	0.778	0.957169	0.323582	0.738051	0.00148783	0.771077	0.00258873
CSA002304.1	vacuolar protein sorting-associated protein 9A isoform X3	1	1	28.989											1.8648	5.6	1	1	1			0.825			1.066			1.171	1.29212		1.41939		1.0985
CSA002310.1	calcium-transporting ATPase, endoplasmic reticulum-type	1	0	105.47						1.5882	5.7	5	8	1
CSA002311.1	NC domain-containing family protein	1	1	25.895											3.887	7.4	1	1	1			1.101			1.032			0.826	0.93733		0.750227		0.800388
CSA002313.1	bifunctional fucokinase/fucose pyrophosphorylase	3	3	118.89	174.98	12.6	10	13	10	65.639	10.5	9	10	9	80.95	14.1	11	14	11	1.142	1.153	1.101	1.047	1.075	1.075	0.737	0.758	0.802	0.941402	0.022536	0.676384	0.000123076	0.718486	0.000147606
CSA002315.1	serine/arginine-rich splicing factor RS31 isoform X2	3	3	38.212	10.678	13.8	4	4	4	11.622	15	5	5	5	7.6152	9.9	3	3	3	1.493	1.582	1.51	0.708	0.699	0.721	0.632	0.519	0.596	0.464122	8.15177e-06	0.381025	2.54241e-05	0.820959	0.0200775
CSA002316.1	serine/arginine-rich splicing factor RS31 isoform X1	2	2	7.5396	3.6891	20.9	1	1	1	9.8485	20.9	1	1	1						1.567	1.617		0.675	0.672		0.565	0.501		0.423053	0.000742674	0.334799	0.00146714	0.791388	0.0482557
CSA002317.1	probable acyl-activating enzyme 1, peroxisomal isoform X1	3	3	60.08	21.331	10.4	6	10	5	24.84	7.5	4	6	3	17.496	10.6	6	9	6	0.791	0.847	0.942	1.211	1.157	1.17	1.063	0.956	0.896	1.37132	0.00244691	1.12984	0.164851	0.823912	0.0156828
CSA002318.1	laccase-15	3	1	19.635	-2	6.9	1	1	1	1.2127	6.9	1	2	1	2.2837	6.9	1	1	1			0.778			0.92			1.393	1.18252		1.79049		1.51413
CSA002320.1	14-3-3-like protein GF14 kappa	3	3	28.551	55.443	59.3	14	28	8	111.66	68	16	27	10	101.5	67.2	15	31	9	1.164	1.139	1.058	0.946	0.999	1.03	0.795	0.851	0.804	0.885153	0.0331549	0.72895	0.00112831	0.823529	0.00432902
CSA002328.1	serine/threonine-protein phosphatase 2A 65 kDa regulatory subunit A beta isoform-like	3	1	38.029	68.568	30.7	8	10	1	6.7706	19	7	9	1	5.027	20.5	6	9	1	0.915			1.009			1.108			1.10273		1.21093		1.09812
CSA002332.1	protodermal factor 1	3	3	38.809	3.1232	4.3	1	1	1	4.011	4.3	1	1	1	5.1123	6.3	2	2	2	1.252	1.309	1.313	0.946	0.881	0.884	0.709	0.702	0.692	0.699793	0.000179349	0.54285	8.33823e-06	0.775729	0.000738437
CSA002333.1	eukaryotic translation initiation factor 4B3	3	3	46.022	6.9805	9.5	3	3	2	19.269	8.1	3	3	2	9.5667	7.1	3	3	2	1.189	1.507	1.521	0.879	0.761	0.741	0.869	0.556	0.559	0.564619	0.00631156	0.470477	0.0077148	0.833263	0.304364
CSA002335.1	peptidyl-prolyl cis-trans isomerase-like	3	3	18.032	122.91	83.7	12	65	8	145.54	83.7	12	63	8	159.7	83.7	12	65	8	1.293	1.345	1.332	0.861	0.846	0.86	0.734	0.651	0.648	0.646599	8.90635e-06	0.512091	3.66035e-05	0.791975	0.00339047
CSA002339.1	translocon-associated protein subunit alpha-like	3	2	17.799	2.767	9.2	1	1	1	3.9007	9.2	1	1	1	7.0759	9.2	1	2	1		1.173	1.188		0.964	1.013		0.799	0.725	0.837357	0.0173467	0.645489	0.00803967	0.770865	0.0363076
CSA002354.1	quinone oxidoreductase-like	3	3	37.238	316.97	59.9	17	35	17	323.31	62.5	17	39	17	323.31	59.9	17	39	17	0.957	0.916	0.93	1.023	0.995	1	1.026	1.096	1.086	1.0767	0.0083906	1.14449	0.00565224	1.06296	0.0543542
CSA002357.1	2-oxoglutarate-dependent dioxygenase DAO	2	0	33.623	1.7439	3.3	1	1	1						2.1661	3.3	1	1	1
CSA002361.1	chlorophyll a-b binding protein 13, chloroplastic	3	3	30.435	134.48	50.5	6	23	3	124.45	50.5	6	15	3	137.75	44.1	5	17	3	0.625	0.63	0.678	0.809	0.864	0.878	1.726	1.652	1.578	1.31971	0.00158432	2.56389	2.55725e-05	1.94277	7.30478e-05
CSA002362.1	double-strand break repair protein MRE11	3	1	82.488	2.4193	1.1	1	1	1	1.8873	1.1	1	1	1	2.4972	1.1	1	1	1			1.219			1.072			0.619	0.879409		0.507793		0.577425
CSA002364.1	vesicle-associated protein 4-1-like isoform X2	1	0	9.7137	1.6349	12.5	1	1	1
CSA002375.1	acyl-CoA-binding domain-containing protein 4	3	3	55.45	87.485	32.3	15	22	14	193.99	39.4	15	23	15	100.54	33.9	14	19	14	1.079	0.993	1.031	1.144	1.15	1.178	0.776	0.808	0.75	1.11892	0.010371	0.752175	0.0010308	0.672235	4.3535e-05
CSA002378.1		3	3	9.5937	5.428	17.1	1	1	1	6.5477	17.1	1	2	1	4.765	17.1	1	1	1	1.025	1.061	1.133	1.01	1.016	0.964	0.955	0.899	0.855	0.92886	0.0995973	0.841566	0.0167138	0.90602	0.0480683
CSA002382.1	protein DA1-related 1-like	3	0	54.563	3.5369	4.8	2	2	2	1.1203	3.5	2	3	2	5.5698	4.2	2	2	2
CSA002390.1	GDSL esterase/lipase At4g01130-like, partial	3	3	65.821	7.626	5.6	3	4	3	32.1	5.6	2	2	2	10.849	8.3	3	4	3	0.727	0.849	0.843	1.236	1.015	0.987	1.124	1.192	1.231	1.33857	0.0363793	1.46631	0.00174274	1.09543	0.290957
CSA002391.1	ribosomal protein S1 (mitochondrion)	3	1	31.42	9.6307	12	2	2	2	22.257	12	2	2	2	13.88	12	2	2	2		0.943			0.987			1.093		1.04666		1.15907		1.1074
CSA002397.1	3-oxoacyl-[acyl-carrier-protein] synthase I, chloroplastic	3	3	18.963	4.5004	17.9	3	5	1	5.7122	17.9	3	6	1	10.31	30.6	4	7	2	0.911	0.983	0.97	0.963	0.881	0.916	1.162	1.152	1.133	0.963687	0.345994	1.20356	0.00121106	1.24891	0.000817101
CSA002399.1	3-oxoacyl-[acyl-carrier-protein] synthase I, chloroplastic	2	1	7.4374	1.7269	52.9	2	3	1	1.3514	52.9	2	3	1							1.022			0.918			1.058		0.898239		1.03523		1.15251
CSA002406.1	oleoyl-acyl carrier protein thioesterase 1, chloroplastic	3	2	42.965	7.6435	8.9	3	3	3	5.2443	8.7	3	3	3	9.3714	10.5	4	4	4		1.091	1.045		1.022	1.038		0.85	0.896	0.964419	0.259021	0.817416	0.0267139	0.847573	0.023223
CSA002411.1	RPM1-interacting protein 4	3	3	29.353	7.4284	14.3	4	4	4	5.9141	18.4	5	5	5	9.1971	14.7	4	5	4	1.02	0.967	0.903	0.998	0.984	1.05	0.974	1.063	1.081	1.04913	0.29519	1.07889	0.183454	1.02836	0.499913
CSA002425.1	transcription and mRNA export factor SUS1	2	2	13.886						1.1678	9.7	1	3	1	2.7238	9.7	1	1	1		1.124	1.156		0.933	0.993		0.901	0.792	0.844737	0.0349744	0.742544	0.0354718	0.879024	0.201994
CSA002426.1	mitochondrial import receptor subunit TOM20	3	3	21.732	42.286	44.3	8	14	8	43.513	44.8	9	13	9	33.566	38.7	8	12	8	1.111	1.105	1.085	0.922	0.965	0.96	0.878	0.945	0.931	0.862466	0.000645929	0.834293	0.00113035	0.967334	0.274591
CSA002433.1	solute carrier family 25 member 44	1	1	34.835											2.5427	5	2	2	2			1.032			1.059			0.891	1.02616		0.863372		0.84136
CSA002437.1	phospholipase A I isoform X1	2	1	130.4	2.2869	0.7	1	1	1	3.8389	2	2	2	2							1.136			0.999			0.813		0.879401		0.715669		0.813814
CSA002446.1	thymidylate kinase isoform X1	3	3	29.202	5.4225	14	3	3	2	2.0091	12.1	3	3	1	8.314	14	3	3	2	1.064	1.034	1.08	0.959	1.036	1.031	0.955	0.914	0.856	0.952171	0.147827	0.857458	0.0089087	0.900529	0.0575348
CSA002448.1	ribosome-recycling factor	2	1	14.446	4.0107	18	2	2	2	4.2276	18	2	2	2						1.125			0.926			0.907			0.823111		0.806222		0.979482
CSA002450.1	cytochrome c1-2, heme protein, mitochondrial-like	3	3	35.111	31.416	26	5	11	2	39.377	23.8	4	12	2	33.973	26.3	5	13	2	0.985	1.008	0.96	0.979	0.955	0.995	1.025	1.097	1.06	0.991873	0.681168	1.07755	0.0378341	1.08638	0.0239924
CSA002452.1	transcription termination factor MTERF5, chloroplastic	1	1	52.458											3.5405	4.5	2	2	2			0.851			1.326			0.854	1.55817		1.00353		0.644042
CSA002453.1	glutamine--fructose-6-phosphate aminotransferase	3	3	74.771	35.128	11.6	5	6	5	53.665	12.4	6	7	6	34.963	14.7	7	8	7	1.222	1.571	1.202	0.869	0.752	0.847	0.94	0.478	0.794	0.617772	0.015226	0.553692	0.0306585	0.896272	0.57768
CSA002454.1	stress protein DDR48-like	3	3	16.973	2.9192	7.3	1	2	1	2.4355	7.3	1	1	1	1.7955	7.3	1	1	1	1.564	1.388	1.362	0.624	0.659	0.666	0.624	0.831	0.859	0.451785	0.000261397	0.536393	0.00239865	1.18728	0.18117
CSA002458.1	neuronal PAS domain protein	3	1	59.596	3.7386	3	1	1	1	4.0425	3	1	1	1	5.4542	3	1	1	1			0.639			1.203			1.281	1.88263		2.00469		1.06484
CSA002459.1	ABC transporter B family member 1	3	1	149.02	12.785	17.1	17	23	4	6.29	13.2	14	19	2	8.5979	15.9	16	23	3			1.128			0.99			0.833	0.87766		0.738475		0.841414
CSA002463.1	succinate dehydrogenase	2	1	29.639	1.5003	26.3	8	11	1						2.8816	22.2	6	9	1			1.067			0.919			0.996	0.861293		0.933458		1.08379
CSA002466.1	2-hydroxyacyl-CoA lyase	3	3	61.941	164.99	51.8	22	42	22	252.72	51.6	22	48	22	220.33	41.3	19	44	19	0.806	0.841	0.837	1.114	1.089	1.106	1.126	1.102	1.133	1.33213	3.22401e-05	1.35306	3.57945e-05	1.01571	0.220061
CSA002471.1	branchpoint-bridging protein	2	2	89.066	2.7816	4.3	3	4	1						2.7329	5.2	4	5	1	1.519		1.524	0.815		0.809	0.481		0.482	0.533684	3.02932e-05	0.316464	6.00956e-06	0.59298	8.46727e-05
CSA002472.1	magnesium-chelatase subunit ChlH, chloroplastic	3	3	154.53	211.04	27.1	33	42	33	218.79	23.5	29	39	29	276.78	30.2	39	52	39	0.888	0.887	0.875	1.265	1.258	1.242	0.915	0.923	0.847	1.42075	1.27509e-06	1.01321	0.6584	0.713147	0.000136303
CSA002473.1	probable glycosyltransferase STELLO1	3	3	87.551	25.584	2.4	2	2	2	14.072	2.9	2	2	2	17.846	3.5	3	3	3	1.238	1.218	1.132	1.052	1.045	1.062	0.614	0.649	0.75	0.880435	0.0121762	0.561037	0.00054765	0.637227	0.00074338
CSA002474.1	protein GrpE	3	3	34.762	84.431	41.5	14	23	14	167.82	49	16	28	16	116.6	51.3	18	28	18	0.737	0.75	0.741	1.178	1.135	1.126	1.162	1.159	1.202	1.54354	1.6561e-05	1.58124	7.34216e-06	1.02443	0.257129
CSA002475.1	pentatricopeptide repeat-containing protein At1g20230-like	2	0	82.389	4.6797	2.3	1	1	1						2.1194	1.2	1	1	1
CSA002477.1	formin-like protein 18	3	3	14.865	77.275	26.4	4	12	4	37.104	26.4	4	8	4	63.226	26.4	3	8	3	1.091	1.059	1.101	0.979	0.976	1.013	0.866	0.944	0.867	0.91295	0.0055604	0.823439	0.00265544	0.901954	0.0269783
CSA002478.1	probable amino-acid racemase	3	3	36.109	8.8906	7.9	2	5	2	12.149	13.4	4	5	4	13.983	10.6	3	5	3	0.919	0.928	0.947	1.08	1.011	1.024	1.023	1.027	1.048	1.11489	0.0092438	1.1088	0.000862488	0.994543	0.813919
CSA002485.1	biotin carboxyl carrier protein of acetyl-CoA carboxylase	3	3	47.514	17.941	6.3	1	2	1	12.847	14	3	3	3	10.751	7.9	2	2	2	0.837	0.777	0.857	1.3	1.404	1.131	0.901	0.872	1.056	1.552	0.00542995	1.14488	0.126438	0.737679	0.0266775
CSA002486.1	thaumatin-like protein	2	2	19.34						8.9054	11.1	1	1	1	4.4759	11.1	1	1	1		0.772	0.693		0.831	0.8		1.497	1.639	1.11331	0.189617	2.14061	0.0093245	1.92275	0.00919813
CSA002491.1	40S ribosomal protein S25 isoform X1	2	0	12.431	3.2019	17	2	3	1						1.9433	17	2	4	1
CSA002499.1	probable cinnamyl alcohol dehydrogenase 1	3	3	42.821	39.126	17.5	6	7	4	24.006	17.5	6	9	4	51.817	22.7	7	10	5	0.84	0.775	0.737	0.861	0.936	0.84	1.371	1.38	1.518	1.12117	0.0858438	1.81505	0.000343087	1.61889	0.000619421
CSA002500.1	6-phosphofructo-2-kinase/fructose-2,6-bisphosphatase	2	1	66.27	1.5395	9.6	4	4	1						3.5402	11.9	5	7	1	0.969			1.066			0.971			1.1001		1.00206		0.910882
CSA002503.1	kirola-like	3	3	16.979	58.987	36.7	5	15	2	97.53	36.7	5	18	2	99.539	36.7	5	20	2	1.223	1.294	1.26	1.191	1.204	1.218	0.483	0.386	0.468	0.956579	0.0673187	0.353985	2.39004e-05	0.370053	1.68357e-05
CSA002512.1	DUF1682 family protein	2	1	57.753	3.8159	5.3	3	3	3						2.5191	3.1	2	2	2	1.202			0.94			0.784			0.78203		0.652246		0.834043
CSA002518.1	exosome complex component RRP41-like isoform X1	3	3	27.455	16.776	15.6	3	3	3	26.718	15.6	3	3	3	22.815	26.6	5	5	5	1.064	1.069	1.107	1.051	0.995	1.005	0.857	0.91	0.851	0.941667	0.0454428	0.808025	0.000859395	0.858079	0.00478287
CSA002525.1	small ubiquitin-related modifier 2-like	3	3	9.7921	37.732	28.2	3	5	1	101.52	27.1	2	3	1	67.519	27.1	2	3	1	1.107	1.215	1.271	0.938	0.945	0.957	0.918	0.762	0.671	0.790426	0.0066027	0.654328	0.00880922	0.827817	0.0873127
CSA002527.1	UPF0664 stress-induced protein C29B12.11c	3	3	18.981	15.609	14.8	1	1	1	26.187	24.3	2	2	2	31.124	33.7	3	3	3	0.791	0.982	0.862	1.07	1.014	1.064	1.214	1.009	1.121	1.19469	0.0431041	1.26907	0.0439014	1.06226	0.350498
CSA002530.1	U3 small nucleolar RNA-associated protein 25	3	3	40.855	90.209	33.7	13	20	11	92.788	23.5	9	15	8	56.078	21.4	9	15	8	1.518	1.539	1.646	0.745	0.686	0.706	0.538	0.542	0.462	0.454391	3.85778e-05	0.327876	2.42736e-05	0.721572	0.00316248
CSA002531.1	GTP-binding protein YPTM2	3	2	22.42	112.08	41.3	6	11	1	111.32	45.8	7	12	0	97.937	49.3	8	15	2	1.165		1.159	0.983		0.984	0.79		0.805	0.846386	0.000290186	0.686317	0.000490756	0.81088	0.00162915
CSA002532.1	extradiol ring-cleavage dioxygenase-like	3	2	9.6649	12.923	27.9	1	1	1	3.061	27.9	1	1	1	6.9834	27.9	1	2	1	1.106		1.201	0.78		0.899	1.09		0.831	0.727785	0.0540667	0.832683	0.296678	1.14413	0.485279
CSA002534.1	mediator of RNA polymerase II transcription subunit 17	3	2	77.375	9.1698	5	3	3	3	7.1643	5.2	3	3	3	7.812	2.4	2	2	2	1.014	1.032		1.041	1.016		0.937	0.939		1.00538	0.755193	0.916911	0.0111598	0.912008	0.0186638
CSA002536.1	CLIP-associated protein isoform X1	3	3	158.25	50.754	12.6	16	19	16	54.474	9.1	11	13	11	94.867	12.6	15	17	15	1.383	1.322	1.465	0.842	0.877	0.867	0.643	0.687	0.589	0.620144	0.000246188	0.460192	0.000116653	0.742073	0.00181138
CSA002537.1	chaperonin CPN60-2, mitochondrial-like	3	3	75.005	323.31	54.9	36	102	24	323.31	56.4	35	102	23	323.31	58.4	39	106	25	1.106	1.101	1.114	1.054	1.062	1.071	0.779	0.763	0.755	0.959651	0.00196814	0.691659	1.81014e-06	0.720741	4.2054e-06
CSA002538.1	allyl alcohol dehydrogenase-like protein	3	3	11.271	65.099	79.2	5	10	5	84.566	70.8	4	7	4	96.951	79.2	5	7	5	0.876	0.932	0.89	1.099	1.056	1.006	1.107	1.054	1.117	1.17161	0.00823303	1.21497	0.00169437	1.03701	0.30565
CSA002540.1	sucrose nonfermenting 4-like protein isoform X3	1	0	15.134	1.3743	8.1	1	1	1
CSA002541.1	starch synthase VI isoform X2	1	0	24.251						6.0278	6.6	1	1	1
CSA002542.1	probable starch synthase 4, chloroplastic/amyloplastic, partial	1	0	9.808	1.3194	9.1	1	2	1
CSA002546.1	starch synthase VI	3	0	7.7165	4.9311	39.4	2	2	2	1.185	21.2	1	1	1	1.7133	21.2	1	1	1
CSA002548.1	serine/threonine-protein kinase HT1	3	3	42.054	4.7238	15.4	5	7	1	8.1243	18.1	6	9	2	6.8697	17.5	6	9	1	1.253	1.351	1.3	0.989	0.884	0.968	0.551	0.64	0.613	0.727715	0.00115942	0.46209	5.47262e-05	0.634988	0.00113634
CSA002549.1	peptidyl-prolyl cis-trans isomerase, chloroplastic	3	3	83.177	243.11	29.9	16	30	16	275.01	29.8	17	30	17	315.88	30.9	18	32	18	0.603	0.549	0.589	0.976	0.99	0.994	1.55	1.644	1.571	1.70017	1.84914e-05	2.73693	6.64716e-06	1.6098	3.19044e-05
CSA002567.1	chaperone protein dnaJ GFA2, mitochondrial	3	2	33.775	2.5141	10	3	3	2	4.9229	7.1	2	2	1	6.4948	12.6	4	4	3	1.189		1.131	0.812		0.902	0.941		0.925	0.738793	0.0298274	0.80431	0.0171134	1.08868	0.238246
CSA002568.1	NAD-dependent epimerase/dehydratase	3	3	27.889	217.46	55.3	14	33	13	311.41	57.6	15	34	14	323.31	54.9	14	35	14	1.024	1.054	1.027	1.122	1.13	1.142	0.819	0.801	0.789	1.09308	0.000993938	0.775845	5.65851e-05	0.709782	6.17985e-06
CSA002572.1	long chain acyl-CoA synthetase 2	3	3	53.508	11.059	6.9	4	5	4	10.652	13.3	6	10	6	23.606	16	7	9	7	0.983	0.973	0.985	1.364	1.367	1.188	0.577	0.567	0.73	1.33254	0.00533351	0.637198	0.00254443	0.478183	0.00100485
CSA002575.1	thioredoxin-like protein Clot	3	3	15.102	199.26	62.1	8	18	8	211.34	56.8	7	20	7	165.12	68.9	9	21	9	1.138	1.115	1.166	0.996	0.992	0.949	0.842	0.897	0.871	0.859023	0.00158699	0.763381	0.000239967	0.888662	0.00758618
CSA002579.1	30S ribosomal protein 2, chloroplastic	3	3	34.722	62.763	28.3	8	13	8	79.525	26.1	7	12	7	24.608	24.8	7	9	7	0.669	0.684	0.634	1.243	1.2	1.246	1.185	1.206	1.19	1.85657	1.11222e-05	1.80221	5.04065e-06	0.970724	0.0897286
CSA002588.1	uncharacterized membrane protein At1g16860-like	2	0	47.701						1.2045	3.4	2	2	2	2.854	3.4	2	2	2
CSA002589.1	hybrid signal transduction protein dokA isoform X2	3	3	22.561	8.7065	20.2	2	2	2	22.95	20.2	2	2	2	4.8586	6.7	1	1	1	1.203	0.964	1.197	0.844	0.906	0.837	0.888	1.151	0.903	0.769025	0.0338329	0.874554	0.292102	1.13722	0.250139
CSA002597.1	haloacid dehalogenase-like hydrolase domain-containing protein At3g48420	3	3	11.962	35.366	48.7	5	8	5	15.668	19.5	2	6	2	28.185	36.3	4	9	4	0.738	0.741	0.73	1.088	1.096	1.059	1.248	1.275	1.279	1.46809	7.93168e-06	1.72114	8.38788e-07	1.17237	0.000233342
CSA002599.1	thioredoxin domain-containing protein 9 homolog	2	1	23.862	9.9683	25	3	3	3						5.8204	7.7	1	1	1			1.154			0.894			0.901	0.774697		0.780763		1.00783
CSA002602.1	peptidyl-prolyl cis-trans isomerase	3	3	18.061	36.582	47.1	7	44	4	52.813	55.8	9	44	5	44.552	55.8	9	41	5	1.112	1.163	1.193	0.888	0.883	0.871	0.961	0.9	0.91	0.761822	0.000339004	0.79902	0.00154773	1.04883	0.0927114
CSA002609.1	vesicle transport v-SNARE 12	3	3	23.1	49.721	43.8	9	10	8	53.767	43.8	8	9	7	34.645	35	6	7	5	1.083	1.079	1.178	1.034	1.037	1.018	0.886	0.816	0.689	0.92485	0.0637054	0.715868	0.0087458	0.774037	0.0159381
CSA002616.1	geraniol 8-hydroxylase-like	1	0	60.944	1.285	9.2	5	5	1
CSA002618.1	26S protease regulatory subunit 10B homolog A-like	2	2	30.691						2.162	64.3	13	34	1	2.7772	64.3	13	31	1		1.326	1.315		0.885	0.907		0.673	0.665	0.678531	0.000838289	0.506626	0.000108946	0.746652	0.00264814
CSA002623.1	transcription factor bHLH3	3	2	53.94	1.8048	5.9	3	3	0	7.7335	8.2	4	4	2	11.792	11.5	5	5	1		1.028	1.093		1.012	0.985		0.948	0.888	0.941537	0.220172	0.865629	0.08433	0.919379	0.134196
CSA002624.1	cytochrome P450 710A11	1	0	57.077						2.2194	3	1	1	1
CSA002627.1	lysosomal Pro-X carboxypeptidase	3	3	57.797	96.229	23.6	10	16	10	56.31	17.3	8	15	8	83.286	19.6	9	14	9	0.765	0.753	0.748	1.316	1.297	1.253	1.057	0.961	1.004	1.70609	1.02583e-05	1.33363	0.000869282	0.781686	0.00109391
CSA002628.1	protein CROWDED NUCLEI 4 isoform X2	3	3	110.59	29.934	10.4	11	12	8	33.356	11.6	11	15	8	31.528	9.9	10	12	7	0.97	0.883	0.88	1.011	1.138	1.15	0.994	1.013	1.043	1.2071	0.0241214	1.11599	0.0321692	0.924523	0.150156
CSA002629.1	branched-chain-amino-acid aminotransferase 3, chloroplastic	3	3	45.763	119.08	29.9	11	19	5	120.85	35.4	13	20	6	104.27	39.7	14	18	7	0.96	1.032	0.936	1.042	1.029	1.065	0.944	0.867	0.959	1.07104	0.0868657	0.946038	0.263799	0.883291	0.0159182
CSA002631.1	60S ribosomal protein L7-2-like	3	3	29.836	7.5291	13.8	3	3	3	9.0842	16.9	4	4	4	10.337	16.1	4	5	4	1.634	1.414	1.505	0.764	0.825	0.814	0.376	0.617	0.502	0.527784	0.000421033	0.328355	0.000417701	0.622139	0.0137075
CSA002636.1	squalene epoxidase 3	3	1	58.566	3.8229	2.8	2	2	2	3.5718	2.8	2	2	2	4.318	2.8	2	2	2			0.962			0.848			1.217	0.881497		1.26507		1.43514
CSA002646.1	50S ribosomal protein L7/L12-like	3	1	18.301	1.4534	5.3	1	1	1	5.2642	18.2	4	4	4	5.0044	13.5	2	2	2		1.012			1.007			0.975		0.995059		0.963439		0.968222
CSA002659.1	protein transport protein Sec23A-like, partial	3	3	45.606	222.89	45.4	9	15	8	167.33	36.3	8	17	7	109.68	31.9	7	13	6	1.128	1.085	1.248	1.018	1.019	0.999	0.868	0.842	0.668	0.877203	0.0450528	0.687085	0.010491	0.783267	0.0254704
CSA002663.1	probable CDP-diacylglycerol--inositol 3-phosphatidyltransferase 2	2	2	26.031						7.8054	9.6	2	2	2	4.7905	9.6	2	2	2		1.234	1.254		1.037	1.031		0.637	0.615	0.83119	0.00246253	0.503215	0.000578147	0.605416	0.000780036
CSA002665.1	cytochrome c-type biogenesis CcmH-like mitochondrial protein	2	0	17.99						1.9946	4.4	1	1	1	2.5142	4.4	1	1	1
CSA002672.1	acyl-CoA-binding domain-containing protein 4 isoform X1	3	3	73.394	63.049	18.9	11	14	6	72.467	27.3	14	17	11	41.364	17.9	11	18	5	1.177	1.088	1.199	0.961	0.995	0.976	0.774	0.782	0.755	0.84642	0.00738893	0.667148	0.000384956	0.788199	8.25141e-05
CSA002678.1	axial regulator YABBY 1	3	2	23.767	3.5632	7.9	2	4	2	1.9527	4.2	1	2	1	2.8285	7.9	2	3	2	1.545		1.065	0.516		0.683	0.768		1.252	0.459387	0.108941	0.773946	0.477981	1.68474	0.250011
CSA002679.1		1	1	51.998						1.3481	4.1	2	2	2							0.6			0.984			1.571		1.64		2.61833		1.59654
CSA002688.1	caffeoylshikimate esterase isoform X1	3	2	35.726	10.899	2.8	1	1	1	16.019	10.1	3	4	3	22.551	10.1	3	3	3	0.939	0.969		1.044	1.043		1.038	1.021		1.09382	0.0269871	1.07914	0.0483928	0.986584	0.241857
CSA002691.1	glucose-induced degradation protein 8 homolog isoform X2	3	3	40.43	29.845	16.8	5	8	2	39.143	16.5	4	5	2	22.309	20.3	6	7	3	1.056	1.125	0.978	0.994	0.948	0.955	0.929	0.883	1.079	0.917062	0.123092	0.915163	0.287259	0.997929	0.975368
CSA002692.1	alpha-glucan phosphorylase, H isozyme	3	3	96.463	158.57	31.1	22	34	20	162.44	39.8	26	40	25	155.85	34.2	24	34	22	0.783	0.787	0.793	1.22	1.209	1.156	1.094	1.095	1.107	1.51714	3.41104e-05	1.39484	4.29103e-07	0.919386	0.00883677
CSA002693.1	DExH-box ATP-dependent RNA helicase DExH11-like isoform X1	3	2	32.048	2.8195	5.7	2	2	2	10.93	20.1	5	5	5	4.1432	10.8	2	2	2		0.992	1.131		1.079	1.085		0.89	0.728	1.01931	0.796005	0.762129	0.141666	0.747689	0.0779815
CSA002694.1	DExH-box ATP-dependent RNA helicase DExH11-like isoform X2	1	0	27.094											3.3428	5.4	1	1	1
CSA002695.1	ATP-dependent RNA helicase SKI2 isoform X2	2	1	20.599	6.5722	10.2	1	1	1	4.8828	10.2	1	1	1						1.168			1.126			0.632			0.964041		0.541096		0.561279
CSA002696.1	DExH-box ATP-dependent RNA helicase DExH11	1	0	23.251											4.3406	11.6	2	2	2
CSA002700.1	zinc finger CCCH domain-containing protein 49	3	3	55.009	31.81	22.9	11	14	9	42.542	19.2	8	10	7	22.172	21.4	9	13	7	1.127	1.33	1.222	0.896	0.883	0.906	0.894	0.679	0.795	0.729818	0.00494683	0.643653	0.00690968	0.881937	0.166087
CSA002707.1	remorin	1	0	11.028						3.9324	14.7	1	1	1
CSA002712.1	enolase	3	3	44.351	323.31	78.5	24	69	19	323.31	76.1	23	68	17	323.31	76.1	22	58	16	1.282	1.247	1.268	0.899	0.913	0.909	0.721	0.753	0.712	0.716618	5.25591e-06	0.575718	4.78248e-06	0.803381	0.000169563
CSA002721.1	probable methyltransferase PMT4	3	3	42.009	5.9213	5.3	2	2	2	24.18	7.1	3	4	3	32.364	9.8	3	4	3	1.307	1.282	1.387	0.94	1.029	0.947	0.64	0.576	0.522	0.7334	0.00115899	0.437123	8.85693e-05	0.596022	0.000909614
CSA002726.1	glutathione S-transferase L3	3	3	19.406	141.45	32.6	7	17	5	290.45	28.5	6	13	4	86.044	32.6	7	15	5	0.814	0.585	0.779	1.089	1.133	1.111	1.184	1.381	1.269	1.5303	0.00599833	1.76033	0.00376779	1.15032	0.0460478
CSA002729.1	thaumatin-like protein	2	1	46.423	4.7177	4	1	1	1						3.4463	4	1	1	1	1.086			0.996			0.885			0.917127		0.814917		0.888554
CSA002730.1	hsp70-binding protein 1	3	3	33.045	68.993	26.8	7	13	7	91.964	38.9	9	13	9	72.982	28.4	8	12	8	0.874	0.853	0.913	0.873	0.922	0.947	1.269	1.287	1.191	1.03864	0.290715	1.41932	0.00042362	1.36652	0.000791746
CSA002737.1	protein FATTY ACID EXPORT 2, chloroplastic isoform X1	3	3	25.349	1.3998	3.6	1	2	1	2.2119	3.6	1	2	1	-2	3.6	1	1	1	0.79	0.918	0.802	1.038	1.002	1	1.25	1.111	1.274	1.21116	0.0143397	1.44821	0.00452362	1.19572	0.0192159
CSA002741.1	transportin-3 isoform X1	1	1	15.024						4.5632	10.5	1	1	1							0.984			1.064			0.953		1.0813		0.968496		0.895677
CSA002743.1	transportin-3-like isoform X2	2	0	87.402						1.1326	2	1	1	1	2.619	1.9	2	2	2
CSA002771.1	probable plastid-lipid-associated protein 13, chloroplastic	3	3	33.044	52.387	34.9	8	12	8	96.258	48.8	11	16	11	68.288	45.2	10	15	10	0.662	0.681	0.647	0.949	0.918	0.928	1.543	1.535	1.591	1.40452	3.69706e-05	2.34623	1.52383e-06	1.67048	5.93022e-06
CSA002773.1	dual specificity phosphatase domain protein	3	1	7.1044	2.3137	14.1	1	1	1	2.3233	14.1	1	1	1	2.4504	14.1	1	1	1		0.84			1.175			1.032		1.39881		1.22857		0.878298
CSA002775.1	iron-sulfur assembly protein IscA-like 1, mitochondrial	3	0	9.1703	1.5404	10.7	1	1	1	1.4908	10.7	1	1	1	1.6786	10.7	1	1	1
CSA002776.1	iron-sulfur assembly protein IscA-like 1, mitochondrial	3	0	14.253	1.5549	9.5	1	1	1	1.5762	9.5	1	1	1	2.3195	9.5	1	1	1
CSA002777.1	E3 ubiquitin-protein ligase ORTHRUS 2 isoform X1	3	3	81.733	5.0074	4.9	4	4	4	2.8256	2.4	2	2	2	6.8445	4.2	3	3	3	1.792	1.778	1.722	0.527	0.468	0.561	0.397	0.499	0.475	0.294029	3.54682e-06	0.25907	4.03859e-06	0.881105	0.207562
CSA002778.1	integral membrane protein	3	3	35.286	9.7556	7.9	3	5	3	12.333	7.9	3	5	3	11.079	7.9	3	6	3	0.529	0.562	0.606	1.156	1.184	1.119	1.478	1.415	1.457	2.0383	3.59873e-05	2.56335	6.88019e-06	1.25759	0.000356006
CSA002792.1	DNA-directed RNA polymerase V subunit 1 isoform X1	3	3	198.49	177.42	20.1	29	38	29	139	17.3	25	34	25	147.6	20.5	30	39	30	1.374	1.249	1.432	0.894	0.912	0.899	0.598	0.748	0.572	0.667078	0.00115419	0.472996	0.000757818	0.709057	0.00890461
CSA002798.1	UBP1-associated protein 2A	3	3	54.09	85.89	20.9	11	20	11	86.201	27.7	14	23	14	89.835	26.7	14	25	14	1.906	1.843	1.812	0.416	0.475	0.461	0.368	0.466	0.465	0.243122	1.8048e-06	0.233591	4.85565e-06	0.960799	0.658409
CSA002799.1	mannan endo-1,4-beta-mannosidase 2 isoform X1	1	0	51.359	1.3692	2.3	1	1	1
CSA002800.1	REF/SRPP-like protein At1g67360	3	3	25.553	18.954	19.5	5	8	5	58.573	25.1	5	7	5	18.092	33.3	7	10	7	0.729	0.716	0.787	0.896	0.957	0.978	1.459	1.46	1.386	1.26837	0.00371507	1.92876	3.00539e-05	1.52066	0.000144672
CSA002805.1	F1N21.17	3	3	15.026	32.008	52	5	7	5	50.472	47.2	4	7	4	38.182	47.2	4	10	4	0.972	1.004	0.995	1.046	0.99	0.983	0.963	0.969	1.024	1.01616	0.509076	0.994951	0.828479	0.979132	0.492416
CSA002810.1	protein COFACTOR ASSEMBLY OF COMPLEX C SUBUNIT B CCB1, chloroplastic	3	3	35.132	86.957	18.6	6	8	6	135.73	21.7	7	11	7	40.313	16.7	5	9	5	0.468	0.506	0.509	0.888	0.864	0.889	1.766	1.933	1.764	1.78085	1.55156e-05	3.68375	2.09629e-05	2.06853	7.67615e-05
CSA002812.1	histone-lysine N-methyltransferase, H3 lysine-9 specific SUVH4	3	3	102.98	4.078	1.9	2	2	2	2.9506	3	3	3	3	5.5024	1.9	2	2	2	1.347	1.486	1.326	0.834	0.873	0.897	0.699	0.465	0.66	0.626112	0.00063298	0.438567	0.000905546	0.700461	0.0253091
CSA002813.1	alpha-mannosidase-like	3	3	82.953	23.575	9.7	6	8	6	29.891	8.8	5	6	5	25.962	9.7	6	9	6	0.694	0.74	0.803	1.24	1.259	1.226	1.155	1.098	1.116	1.66518	0.00011429	1.50603	0.000457943	0.90443	0.00358339
CSA002814.1	alpha-mannosidase	3	2	35.347	1.8619	2.9	1	1	1	4.2383	2.9	1	1	1	3.4255	2.9	1	1	1		0.724	0.755		1.224	1.164		1.14	1.163	1.6146	0.00547463	1.55713	0.00218728	0.964405	0.316889
CSA002815.1	alpha-mannosidase At3g26720-like	3	3	33.882	36.41	16.2	5	5	5	28.625	15.5	4	5	4	25.965	19.1	5	6	5	0.659	0.733	0.893	1.094	1.195	1.145	1.179	1.093	1.131	1.50284	0.00693612	1.48928	0.00709458	0.990973	0.800815
CSA002816.1	RING finger protein 10 isoform X3	1	1	55.929	1.4047	2.2	1	1	1											0.569			1.058			1.534			1.8594		2.69596		1.44991
CSA002821.1	protein HOTHEAD-like	3	3	63.822	14.544	6.3	5	6	5	28.254	7.5	6	9	6	12.224	7.5	5	7	5	0.663	0.717	0.728	1.76	1.709	1.698	0.625	0.604	0.572	2.45114	3.25954e-06	0.854364	0.0155747	0.348558	1.3687e-06
CSA002826.1	alpha-N-acetylglucosaminidase	2	1	97.929						1.4512	0.9	1	1	1	1.711	0.9	1	1	1		0.722			1.213			1.154		1.68006		1.59834		0.95136
CSA002827.1	germin-like protein 9-3	2	2	21.531	1.6455	9.8	2	3	1						6.0474	14.6	3	4	2	0.576		0.53	0.961		0.946	1.63		1.709	1.72423	0.00362884	3.01899	0.00167179	1.75092	0.00313835
CSA002828.1	isocitrate dehydrogenase	3	3	19.402	26.296	22.5	4	6	3	47.353	22.5	4	5	3	9.2342	12.7	2	4	1	0.867	0.863	0.861	1.185	1.21	1.223	0.972	0.987	0.952	1.39637	7.04457e-06	1.1235	0.000488946	0.804588	9.76535e-05
CSA002829.1	isocitrate dehydrogenase	3	3	25.563	44.16	42	11	17	7	38.402	25.4	5	9	4	13.335	29.5	7	12	4	0.908	0.925	0.91	1.157	1.092	1.159	0.963	1.003	0.954	1.24244	0.000611121	1.06453	0.0210057	0.856808	0.003654
CSA002830.1	isocitrate dehydrogenase	3	3	11.474	36.479	46.5	4	5	4	42.352	46.5	4	5	4	32.453	26.7	3	5	3	1.006	0.983	0.956	1.11	1.094	1.167	0.864	0.899	0.893	1.14465	0.00581198	0.901868	0.00592907	0.787897	0.00064008
CSA002831.1	polyribonucleotide nucleotidyltransferase 2, mitochondrial	2	2	101.1						4.488	8.8	7	10	2	46.252	8.3	7	8	4		1.112	0.506		0.981	1.624		0.865	1.01	1.61001	0.380157	1.15884	0.720018	0.71977	0.383444
CSA002832.1	pantothenate kinase 2 isoform X2	3	3	60.608	17.66	10.4	5	6	3	35.012	11.8	5	7	1	23.787	13.3	6	8	2	0.881	0.821	0.879	0.989	0.942	0.876	1.176	1.311	1.301	1.08756	0.120068	1.46765	0.00108016	1.34948	0.00385855
CSA002836.1	peptidyl-prolyl cis-trans isomerase CYP23	3	3	27.102	12.786	16.7	4	4	4	6.2451	12.5	3	3	3	12.345	17.9	4	4	4	1.443	1.382	1.434	0.958	0.975	0.978	0.432	0.498	0.423	0.683494	2.32681e-05	0.31768	5.73607e-06	0.464789	2.9044e-05
CSA002837.1	ATP-dependent Clp protease ATP-binding subunit CLPT2, chloroplastic	3	3	28.916	81.163	37.1	8	18	8	25.038	25.8	7	16	7	59.838	34.5	8	16	8	0.681	0.707	0.736	1.157	1.123	1.135	1.26	1.305	1.227	1.60782	2.13388e-05	1.78531	3.59886e-05	1.1104	0.00704309
CSA002841.1	ATPase subunit 4 (mitochondrion)	3	3	58.706	5.7309	4	2	4	2	4.6288	4	2	3	2	5.0385	4	2	3	2	0.958	1.047	1.063	1.043	0.956	1.005	0.993	0.983	0.908	0.97914	0.632253	0.940026	0.220349	0.960053	0.338063
CSA002844.1	60S ribosomal protein L23a	2	2	17.46	41.543	34.4	5	9	1	1.9973	41.6	7	15	1						1.621	1.725		0.603	0.526		0.568	0.509		0.337418	0.00338954	0.321877	0.00276549	0.953942	0.645561
CSA002846.1	elongation factor 1-alpha-like	3	3	7.3985	11.982	17.4	1	2	1	16.597	17.4	1	4	1	5.8064	17.4	1	4	1	1.161	1.028	1.048	0.943	1.01	1.01	0.838	0.834	0.908	0.915354	0.124169	0.797034	0.0102239	0.870739	0.0176639
CSA002849.1	triphosphate tunel metalloenzyme 3 isoform X2	2	1	23.936						12.121	10.9	2	2	2	4.8978	12.8	2	2	2		1.078			0.999			0.893		0.926716		0.828386		0.893894
CSA002862.1	universal stress protein A-like protein	1	1	7.8602						1.4436	9.9	1	1	1							1.257			0.92			0.73		0.731901		0.580748		0.793478
CSA002864.1	Golgi SNAP receptor complex member 1-2	3	3	26.808	9.5596	12.5	3	4	2	5.4181	24.6	6	6	2	5.7799	25	6	6	2	1.001	1.015	1.04	1.037	1.039	1.04	0.915	0.938	0.901	1.01963	0.155352	0.901178	0.00303894	0.883825	0.000368182
CSA002865.1	30S ribosomal protein S20, chloroplastic	3	3	14.446	2.2242	7	1	2	1	3.1944	7	1	1	1	2.9391	7	1	1	1	1.478	1.566	1.628	0.647	0.666	0.615	0.718	0.578	0.547	0.412671	3.77161e-05	0.394478	0.000159205	0.955913	0.631591
CSA002878.1	NEDD8-activating enzyme E1 regulatory subunit AXL-like	1	1	21.824											1.5746	3.6	1	1	1			0.641			1.235			1.243	1.92668		1.93916		1.00648
CSA002884.1	prolyl endopeptidase isoform X2	2	2	74.978						6.1309	8.9	5	7	3	9.8623	8.6	5	6	3		0.455	0.588		0.789	0.874		1.982	1.706	1.59444	0.0591232	3.53595	0.0131528	2.21768	0.0197384
CSA002885.1	bifunctional dethiobiotin synthetase/7,8-diamino-pelargonic acid aminotransferase, mitochondrial[Daucus carota subsp. sativus]	3	0	28.611	3.9737	5.7	1	1	1	3.0466	5.7	1	1	1	4.6158	5.7	1	1	1
CSA002886.1	bifunctional dethiobiotin synthetase/7,8-diamino-pelargonic acid aminotransferase, mitochondrial-like isoform X2	3	3	22.574	6.468	6.6	1	1	1	12.607	16.2	3	3	3	10.437	16.2	3	3	3	0.808	0.82	0.828	1.047	1.04	1.143	1.214	1.205	1.083	1.31515	0.00157011	1.4259	0.00121856	1.08421	0.166904
CSA002887.1	bifunctional dethiobiotin synthetase/7,8-diamino-pelargonic acid aminotransferase, mitochondrial,partial	1	0	7.9972											1.82	11.1	1	1	1
CSA002888.1	bifunctional dethiobiotin synthetase/7,8-diamino-pelargonic acid aminotransferase, mitochondrial-like[Ananas comosus]	3	0	7.845	6.6498	40.3	2	2	2	7.4906	40.3	2	2	2	5.5509	40.3	2	2	2
CSA002889.1	bifunctional dethiobiotin synthetase/7,8-diamino-pelargonic acid aminotransferase, mitochondrial[Vitis vinifera]	2	0	14.303						2.4378	11.5	1	1	1	3.9568	11.5	1	1	1
CSA002890.1	Adenosylmethionine-8-amino-7-oxononanoate aminotransferase	3	3	11.972	19.333	12	1	1	1	11.419	12	1	1	1	29.122	12	1	1	1	0.774	0.721	0.808	1.1	1.095	1.071	1.206	1.284	1.189	1.41815	0.000280465	1.59748	0.000289627	1.12645	0.0108156
CSA002891.1	bifunctional dethiobiotin synthetase/7,8-diamino-pelargonic acid aminotransferase, mitochondrial[Jatropha curcas]	1	1	10.135	3.8819	15.1	1	1	1											0.91			1.053			1.068			1.15714		1.17363		1.01425
CSA002892.1		2	1	9.066	10.842	14.6	1	1	1						3.1993	14.6	1	1	1	1.022			1.071			0.893			1.04795		0.873777		0.8338
CSA002893.1	calmodulin-binding protein 60 B-like	3	3	81.597	23.865	6.2	5	6	2	15.645	10.7	8	9	3	14.169	5.5	5	8	2	1.07	1.063	1.031	1.14	1.14	1.15	0.752	0.761	0.727	1.08407	0.00206021	0.707965	4.01583e-05	0.653061	3.16501e-06
CSA002896.1	uncharacterized mitochondrial protein AtMg00810-like	3	3	42.451	30.916	7.9	2	3	2	34.276	7.9	2	3	2	39.513	7.9	2	4	2	0.552	0.5	0.752	0.886	0.933	0.998	1.743	1.765	1.345	1.56153	0.0154886	2.69013	0.00290745	1.72275	0.00841485
CSA002917.1		1	0	9.6469	2.7902	14.1	1	1	1
CSA002918.1	BSD domain-containing family protein	3	3	53.366	11.946	13	5	5	5	12.692	11.3	5	5	5	13.762	6.8	3	4	3	1.002	1.096	1.117	1.042	1.013	0.923	0.952	0.854	0.921	0.926283	0.191615	0.848212	0.0235609	0.915715	0.143339
CSA002923.1	pentatricopeptide repeat-containing protein At1g61870, mitochondrial	3	3	44.555	4.0325	8.3	3	4	3	3.4227	7.1	3	4	3	12.575	8.3	3	4	3	1.064	1.165	1.151	0.943	0.945	0.94	0.973	0.815	0.856	0.836686	0.00434545	0.782249	0.0125381	0.934936	0.264988
CSA002924.1	derlin-2.2	2	1	31.173	2.176	7.4	2	2	1	1.5399	4.5	1	1	1						0.796			1.009			1.273			1.26759		1.59925		1.26165
CSA002925.1	DDB1- and CUL4-associated factor 13	3	2	32.351	4.3892	6.8	2	2	2	2.5175	6.8	2	2	2	3.1515	6.8	2	2	2	1.485		1.465	0.768		0.79	0.579		0.583	0.528136	0.000455907	0.393898	0.000130099	0.745828	0.00317328
CSA002928.1	microtubule-associated protein RP/EB family member 1A	1	0	31.221											3.4748	5	1	1	1
CSA002930.1	phytoene synthase 2, chloroplastic	3	3	47.582	4.0921	4.3	2	3	2	5.7811	6.4	3	3	3	5.3843	5.7	2	2	2	0.978	0.979	0.984	1.072	1.09	1.124	0.952	0.933	0.889	1.11731	0.00170145	0.943217	0.0411884	0.844187	0.00209716
CSA002932.1	tubulin-folding cofactor E	3	2	67.161	1.5989	1.3	1	1	1	32.225	2.8	1	1	1	18.044	2.8	1	1	1		1.402	1.43		0.819	0.746		0.64	0.679	0.552613	0.00378642	0.465749	0.0010054	0.842812	0.0970029
CSA002933.1	far upstream element-binding protein 1 isoform X2	3	3	82.139	77.348	13.5	7	8	7	111.44	19.5	11	13	11	110.01	19.9	10	13	10	1.067	1.082	1.095	0.967	0.935	0.977	0.948	0.927	0.937	0.887485	0.00126566	0.866831	0.000141141	0.976728	0.186977
CSA002938.1	sulfite reductase	3	3	72.525	154.51	38.5	19	35	11	174.67	35.4	18	31	9	151.98	35.4	17	36	8	1.013	1.006	1.013	0.993	0.962	0.994	1	1.063	1.081	0.972625	0.061897	1.03694	0.204706	1.06612	0.071694
CSA002942.1	cell division control protein 2 homolog C	1	1	44.951	2.3374	14.4	3	3	2											1.705			0.555			0.503			0.325513		0.295015		0.906306
CSA002943.1	serine/threonine-protein phosphatase PP1-like	2	0	34.322	8.4872	11	3	4	0	5.4439	14	4	6	0
CSA002945.1	probable calcium-binding protein CML43	3	3	22.496	8.5741	16.9	3	4	3	7.2343	23.9	5	5	5	10.43	23.4	5	5	5	0.987	0.923	1.057	1.013	1.028	1.007	1.003	1.15	0.914	1.0273	0.528795	1.0337	0.694556	1.00623	0.931372
CSA002948.1	cellulose synthase A catalytic subunit 3	2	2	119.24	54.417	14	11	15	7	42.618	15	13	14	8						1.128	0.959		0.933	0.954		0.91	1.022		0.904169	0.361136	0.925731	0.524448	1.02385	0.73105
CSA002951.1	thioredoxin-like 4, chloroplastic isoform X1	3	3	24.6	12.782	13	2	2	2	12.851	7.4	1	1	1	5.8807	7.4	1	1	1	0.782	1.056	1.089	1.003	1.015	1.065	1.299	0.906	0.807	1.0533	0.627633	1.02904	0.8819	0.97697	0.883383
CSA002952.1	trafficking protein particle complex subunit 8 isoform X2	1	1	12.784											5.7455	26.3	3	5	3			1.083			1.029			0.851	0.950139		0.78578		0.827017
CSA002953.1	trafficking protein particle complex subunit 8	2	2	45.451	10.368	10.1	4	4	4	13.705	11.3	4	4	4						1.125	1.082		1.003	1.035		0.823	0.849		0.923425	0.0875789	0.757589	0.00870669	0.820412	0.0124542
CSA002958.1	trafficking protein particle complex subunit 8 isoform X2	3	3	12.391	5.7234	16.5	2	2	2	3.9271	16.5	2	2	2	2.1236	6.4	1	1	1	1.06	1.133	1.181	1.006	0.934	0.999	0.91	0.887	0.751	0.871073	0.0259721	0.755187	0.0106005	0.866962	0.0755964
CSA002959.1	trafficking protein particle complex subunit 8 isoform X2	3	3	47.036	4.4575	5.3	3	4	3	4.0227	5.3	3	4	3	4.8072	5.3	3	4	3	1.078	1.095	1.098	0.984	1.016	0.998	0.901	0.953	0.821	0.916539	0.00123132	0.817793	0.00694277	0.892262	0.052641
CSA002961.1	syntaxin-121-like	3	3	34.239	11.366	13.5	4	4	4	15.285	19.1	5	5	5	19.05	14.8	4	5	4	0.913	1.038	1.024	0.948	0.938	0.976	1.177	1.014	0.993	0.962017	0.411728	1.07025	0.377908	1.11251	0.144299
CSA002964.1	putative deoxyribonuclease TATDN1	3	3	13.728	4.3796	15.7	2	2	2	1.4272	14.9	2	2	2	2.3547	14.9	2	2	2	1.033	1.076	1.12	0.967	1.002	0.916	0.989	0.893	0.925	0.893465	0.03174	0.869309	0.020413	0.972964	0.528143
CSA002965.1	putative deoxyribonuclease TATDN1	2	1	14.759	2.2928	7.6	1	1	1						2.5632	6.9	1	1	1			1.043			0.916			1.031	0.878236		0.988495		1.12555
CSA002966.1	33 kDa ribonucleoprotein, chloroplastic	3	3	34.837	40.719	26.4	6	9	6	73.678	26.4	6	10	6	88.129	24.5	6	9	6	0.961	0.998	0.994	1.007	1.04	1.09	0.984	0.935	0.943	1.06231	0.0841844	0.969184	0.188876	0.912337	0.0324038
CSA002970.1	signal recognition particle 14 kDa protein	3	3	13.968	27.507	21.8	2	3	2	10.08	21.8	2	2	2	2.9555	7.3	1	1	1	1.526	1.511	1.726	0.613	0.653	0.574	0.689	0.668	0.455	0.386311	0.000181783	0.380433	0.00064492	0.984783	0.910692
CSA002974.1	DPP6 N-terminal domain-like protein	3	3	79.961	76.736	24.7	13	19	13	162.03	26.2	15	19	15	94.883	22.6	12	15	12	0.672	0.646	0.588	1.185	1.152	1.203	1.289	1.26	1.363	1.85729	4.7148e-05	2.05247	7.10807e-05	1.10508	0.0220514
CSA002975.1	UPF0051 protein ABCI8, chloroplastic	3	3	65.437	88.3	28.9	11	14	11	74.017	19.2	8	10	8	92.682	29.6	11	14	11	0.672	0.713	0.761	1.271	1.279	1.268	1.159	1.151	1.07	1.77912	2.76998e-05	1.57502	0.000427572	0.88528	0.00697289
CSA002979.1	HD domain-containing protein 2	3	0	24.59	14.856	14.3	3	3	3	6.5258	16.1	2	2	2	5.4135	7.2	1	1	1
CSA002986.1	chromosome-associated kinesin	3	3	15.768	13.023	18.5	2	3	2	21.913	18.5	2	4	2	10.353	18.5	2	4	2	0.918	1.071	1.1	0.931	0.956	0.967	0.967	0.949	0.897	0.923924	0.244443	0.910651	0.201369	0.985634	0.592588
CSA002987.1		3	3	14.081	1.9997	7	1	1	1	3.3653	14	2	3	2	3.3933	14	2	2	2	1.042	0.979	0.952	0.968	0.994	0.958	0.977	0.974	1.112	0.982173	0.572022	1.03027	0.59992	1.04897	0.365619
CSA002988.1		3	3	7.7963	23.455	20.8	1	2	1	14.361	20.8	1	2	1	7.6686	20.8	1	1	1	0.984	0.932	0.884	0.882	0.881	0.909	1.15	1.223	1.259	0.954286	0.231816	1.29714	0.00301316	1.35928	0.000659362
CSA002993.1	translocase of chloroplast 120, chloroplastic isoform X1	3	3	135.13	36.862	12.2	15	22	15	57.912	10.9	12	15	12	45.775	13.8	15	20	15	1.033	0.991	0.995	1.07	1.072	1.068	0.878	0.934	0.991	1.06327	0.00903996	0.928453	0.11069	0.873209	0.0141875
CSA003005.1	cell division cycle 5-like protein	1	0	67.644											3.2672	6.4	3	3	1
CSA003012.1	stomatal closure-related actin-binding protein 1	1	1	59.11	1.7516	1.3	1	1	1											1.11			1.046			0.797			0.942342		0.718018		0.76195
CSA003019.1	phosducin-like protein 3	1	0	10.683						2.6578	15.2	1	1	1
CSA003021.1	U-box domain-containing protein 4	3	1	74.215	4.2024	3.5	2	2	2	3.0372	3	2	2	2	3.3388	3.5	2	2	2	1.008			0.957			1.036			0.949405		1.02778		1.08255
CSA003028.1	FRIGIDA-like protein 3	1	1	65.938	2.1932	3.8	2	2	1											1.055			1.137			0.775			1.07773		0.734597		0.681618
CSA003034.1	glutamyl-tRNA(Gln) amidotransferase subunit C, chloroplastic/mitochondrial-like	3	3	17.302	58.4	38.6	4	8	4	90.906	32	3	4	3	56.823	32	3	5	3	0.735	0.722	0.75	1.071	1.119	1.13	1.31	1.241	1.256	1.5043	4.8132e-05	1.72497	1.86494e-05	1.14669	0.00422987
CSA003040.1	centrosomal protein of 164 kDa isoform X3	3	3	94.653	50.432	24.4	19	23	19	62.873	17.6	14	21	14	74.687	19.5	16	21	16	1.179	1.251	1.258	0.931	0.879	0.886	0.785	0.782	0.737	0.73102	0.000387543	0.624729	9.94635e-05	0.854599	0.00437733
CSA003041.1	protein GPR107-like	3	3	49.969	39.415	14.2	5	7	5	46.632	9.4	3	4	3	48.271	14.2	5	8	5	0.885	0.835	0.877	1.247	1.172	1.228	0.841	0.958	0.874	1.40431	0.000214448	1.02926	0.542721	0.732931	0.00143722
CSA003043.1	homeobox-leucine zipper protein ATHB-12-like isoform X1	3	1	35.878	-2	3.2	1	1	1	-2	3.2	1	1	1	1.751	3.2	1	1	1			0.95			1.059			1.006	1.11474		1.05895		0.949953
CSA003052.1	splicing factor SF3a60 homolog	3	3	59.94	81.425	33.6	14	17	14	84.912	23.8	11	16	11	161.36	34.4	14	20	14	1.1	1.122	1.117	1.018	1.018	1.072	0.817	0.782	0.76	0.930818	0.0159689	0.706499	5.28204e-05	0.759009	0.000521032
CSA003057.1	sec-independent protein translocase protein TATC, chloroplastic	3	3	39.027	49.256	10.4	2	3	2	51.269	13.5	3	4	3	48.854	13.5	3	3	3	0.775	0.753	0.739	1.063	1.072	1.037	1.244	1.263	1.321	1.39921	3.44735e-05	1.68858	3.36327e-05	1.20681	0.00100443
CSA003059.1	cyclin-D1-binding protein 1 homolog	2	1	38.343	4.4539	8.6	3	3	3	2.1507	3.1	1	1	1						1.072			0.961			0.942			0.896455		0.878731		0.980229
CSA003060.1	linoleate 13S-lipoxygenase 2-1, chloroplastic-like	3	3	81.965	323.31	42.6	35	72	27	323.31	42.8	35	67	27	298.29	40.5	34	68	27	0.615	0.619	0.599	1.045	1.045	1.06	1.483	1.458	1.483	1.71849	6.26322e-07	2.41353	1.22833e-07	1.40444	1.63982e-06
CSA003061.1	peptidyl-prolyl cis-trans isomerase CYP28, chloroplastic isoform X1	3	3	35.695	20.743	11	2	3	2	117.41	21.7	5	7	5	73.405	14.7	3	4	3	0.683	0.518	0.645	0.836	0.907	0.994	1.517	1.682	1.441	1.48267	0.0117791	2.51354	0.000429249	1.69529	0.00168826
CSA003062.1	peptidyl-prolyl cis-trans isomerase CYP28, chloroplastic-like	3	2	9.2065	6.4327	28.2	2	2	2	14.381	28.2	2	4	2	10.107	12.9	1	1	1		0.522	0.544		1.118	1.085		1.534	1.54	2.0666	0.00121455	2.88368	0.000128941	1.39537	0.00147962
CSA003071.1	polycomb group protein FERTILIZATION-INDEPENDENT ENDOSPERM isoform X2	3	2	41.466	1.5583	3.2	1	1	1	5.9593	6.8	2	2	2	5.377	6.8	2	2	2		1	1.107		0.949	0.994		1.054	0.857	0.922164	0.293235	0.906977	0.474158	0.983531	0.88872
CSA003072.1	LOW QUALITY PROTEIN: 3-ketoacyl-CoA synthase 19	3	3	51.667	100.51	22.7	8	12	7	63.473	17	6	8	5	83.096	20.5	8	10	6	1.038	1.004	1.054	1.459	1.5	1.488	0.452	0.498	0.409	1.43637	1.92512e-05	0.438953	4.04161e-05	0.305599	3.47553e-06
CSA003073.1	dihydrolipoyl dehydrogenase 2, chloroplastic	3	3	61.646	75.636	36.7	17	22	11	101.73	31	16	21	10	110.88	31.5	15	21	9	0.818	0.849	0.864	1.046	1.051	1.037	1.17	1.106	1.227	1.23825	0.000142619	1.38404	0.000985072	1.11774	0.0249985
CSA003078.1	14-3-3-like protein B	3	3	27.968	22.776	43	12	38	8	48.997	50	14	36	9	38.181	53.7	14	38	8	1.106	1.113	1.096	1.074	1.029	1.071	0.736	0.733	0.795	0.957466	0.0375202	0.682956	7.25485e-05	0.713296	0.000259333
CSA003086.1	ketol-acid reductoisomerase, chloroplastic	3	3	64.105	323.31	46.5	22	58	22	323.31	47.8	24	63	24	323.31	49.7	25	63	25	1.09	1.064	1.076	1.094	1.09	1.088	0.761	0.78	0.798	1.013	0.143856	0.724149	2.21452e-05	0.714853	8.74236e-06
CSA003088.1	3-oxoacyl-[acyl-carrier-protein] reductase 4 isoform X1	3	3	36.62	25.895	18.5	5	7	4	35.481	23.9	6	9	5	38.471	18.5	5	8	4	1.033	1.151	1.141	0.999	1.178	1.212	0.956	0.599	0.563	1.01925	0.793135	0.636992	0.0372448	0.624963	0.0403988
CSA003095.1	phosphoglucan, water dikinase, chloroplastic isoform X1	3	3	148.76	123.27	17.1	18	24	18	148.92	17.3	20	26	20	94.897	15.7	18	23	18	0.722	0.724	0.707	0.917	0.881	0.883	1.511	1.526	1.537	1.24524	0.000164797	2.12448	1.0346e-07	1.70608	1.40846e-06
CSA003110.1	translin	1	1	10.357											6.958	16.7	1	1	1			1.141			1.125			0.671	0.985977		0.588081		0.596444
CSA003111.1	translin-like	1	1	17.79	1.3417	5.2	1	2	1											0.92			0.998			1.113			1.08478		1.20978		1.11523
CSA003118.1	triosephosphate isomerase, chloroplastic	3	3	34.067	217.6	52.2	17	60	7	323.31	52.2	17	60	7	323.31	54	18	56	8	0.755	0.744	0.732	1.125	1.07	1.041	1.127	1.064	1.243	1.45047	0.000194257	1.53922	0.00161733	1.06119	0.318109
CSA003126.1	serine/threonine-protein kinase tricorner-like	2	0	62.624	1.6603	2	1	1	1						1.9431	4.4	2	2	2
CSA003127.1	Splicing factor 3B subunit 5/RDS3 complex subunit 10	3	3	10.419	13.089	22.5	2	5	2	12.497	22.5	2	4	2	7.2213	22.5	2	4	2	1.141	1.115	1.096	1	0.991	1.007	0.819	0.872	0.859	0.894391	0.00103847	0.76074	0.000203506	0.850567	0.000846565
CSA003130.1	protein DEFECTIVE IN MERISTEM SILENCING 3-like isoform X4	2	0	43.959	1.7172	3.1	1	1	1						2.4427	3.1	1	1	1
CSA003134.1		3	1	7.6035	-2	11.8	1	1	1	-2	11.8	1	1	1	-2	11.8	1	1	1			0.3			0.737			2.252	2.45667		7.50667		3.05563
CSA003137.1	fimbrin-1-like	1	0	112.41						1.947	2.5	2	2	2
CSA003138.1	protein ENHANCED DOWNY MILDEW 2 isoform X1	1	0	140.52	1.5378	0.8	1	1	1
CSA003139.1	cytochrome P450 76A2-like	3	3	31.258	-2	2.6	1	2	1	-2	2.6	1	1	1	-2	2.6	1	2	1	0.407	0.571	0.395	0.918	0.94	0.948	1.91	1.659	1.894	2.0437	0.00114503	3.97888	0.000161271	1.9469	0.00040943
CSA003140.1	ATP-citrate synthase alpha chain protein 3	3	3	97.664	18.297	7.7	6	9	2	11.519	4.7	4	8	1	12.339	7.7	6	8	2	1.184	1.306	1.142	0.946	0.927	0.91	0.803	0.656	0.901	0.766244	0.00489823	0.64978	0.00804464	0.848006	0.1216
CSA003143.1	guanylate-binding protein 2	3	3	127.75	130.61	26.2	30	37	19	125.78	27.5	30	36	20	159.43	29.2	30	36	22	1.182	1.083	1.146	1.015	1.027	1.002	0.773	0.828	0.755	0.892407	0.0148206	0.690707	0.00063668	0.773982	0.000579262
CSA003144.1	protein yippee-like At5g53940 isoform X2	2	0	19.907	3.5904	14.8	2	2	2						1.8092	6.8	1	1	1
CSA003156.1	ubiquitin-conjugating enzyme E2 variant 1C	1	1	21.332	3.4482	22.5	5	6	2											1.084			1.007			0.877			0.928967		0.809041		0.870904
CSA003161.1	3-ketoacyl-CoA synthase 1	3	3	59.446	8.1934	10.8	5	6	3	11.798	12.5	6	7	3	17.207	11.7	5	6	3	0.838	0.824	0.866	1.755	1.674	1.495	0.409	0.522	0.61	1.94778	0.00050767	0.609573	0.00521666	0.312957	0.000304839
CSA003197.1	anthranilate phosphoribosyltransferase, chloroplastic	3	2	48.992	6.6123	8.4	3	3	2	5.1123	6	3	4	1	3.9151	6	3	4	1	1.293		1.321	0.872		0.902	0.732		0.663	0.678653	0.00237811	0.533665	0.00371083	0.786359	0.0372241
CSA003208.1	probable lactoylglutathione lyase, chloroplastic	3	3	41.197	55.074	34	12	27	6	56.446	38	14	29	5	42.517	45.7	16	30	7	0.546	0.501	0.566	1.032	0.992	0.972	1.595	1.599	1.627	1.85741	6.02365e-05	2.98884	1.01424e-06	1.60915	7.39768e-06
CSA003213.1	thylakoid lumenal 29 kDa protein, chloroplastic	3	3	36.949	225.84	48.1	11	32	11	262.04	45.4	12	32	12	224.27	39.8	10	34	10	0.608	0.584	0.562	1.001	0.984	0.97	1.55	1.555	1.567	1.68472	1.52389e-05	2.66363	2.72836e-07	1.58105	6.24323e-07
CSA003215.1	serine--tRNA ligase, mitochondrial	3	3	68.072	28.013	19	10	12	10	43.694	16.7	9	11	9	46.623	18.7	9	10	9	0.665	0.659	0.745	1.214	1.191	1.141	1.272	1.216	1.18	1.71387	0.000150072	1.77284	0.00015836	1.0344	0.302154
CSA003232.1	elongation factor 1-gamma	3	3	49.503	210.43	39.9	17	51	15	306.19	43.8	19	55	16	296.97	43.8	19	50	16	1.284	1.259	1.296	0.95	0.952	0.956	0.645	0.659	0.628	0.744465	7.7374e-06	0.503256	1.45211e-06	0.675997	4.57568e-06
CSA003234.1	transcription factor BTF3 homolog 4	3	2	15.153	4.9645	19.4	4	9	1	3.4392	19.4	4	7	1	3.5901	30.9	5	9	1	1.428		1.365	0.899		0.896	0.517		0.607	0.642678	0.00397019	0.402435	0.00430474	0.626184	0.017538
CSA003236.1	protein PIR	2	1	145.97						3.9483	0.9	1	1	1	8.189	2.6	3	4	3			1.092			1.005			0.868	0.92033		0.794872		0.863682
CSA003237.1	GDSL esterase/lipase At5g33370	3	3	40.699	40.057	26.6	7	9	6	58.7	29.3	8	12	7	39.685	26.9	7	10	6	0.718	0.801	0.74	1.47	1.627	1.836	0.855	0.758	0.42	2.18371	0.00121267	0.899956	0.604409	0.412122	0.00464019
CSA003238.1	GDSL esterase/lipase At5g33370	3	3	40.298	11.936	16.3	5	5	3	25.242	19.9	5	6	3	49.591	24	5	6	5	0.714	0.923	0.829	1.548	1.176	1.333	0.805	0.916	0.877	1.64517	0.01274	1.05353	0.556304	0.640375	0.0124622
CSA003239.1	ACT domain-containing protein ACR6 isoform X1	3	3	49.357	-2	1.6	1	1	1	-2	1.6	1	2	1	-2	1.6	1	1	1	0.718	0.651	0.713	1.04	1.056	0.958	1.347	1.422	1.442	1.46686	0.000959414	2.02257	3.93258e-05	1.37885	0.000775547
CSA003243.1	60S ribosomal protein L37a-1-like, partial	3	2	10.126	3.6887	18.7	3	4	3	2.6489	18.7	2	3	2	3.0175	18.7	2	3	2	1.839	2.044		0.492	0.37		0.386	0.235		0.221993	0.00617789	0.159928	0.00603719	0.720418	0.340285
CSA003255.1	metal tolerance protein 4-like	1	0	13.906						3.9691	21.8	1	1	1
CSA003256.1	metal tolerance protein 4-like isoform X1	1	0	21.931	3.1661	6.2	1	1	1
CSA003259.1	long chain acyl-CoA synthetase 4-like	3	3	15.365	6.4773	29.7	4	5	4	2.4002	19.6	3	3	3	7.2454	29.7	4	4	4	1.007	1.057	0.973	1.147	1.172	1.193	0.832	0.736	0.828	1.1564	0.00468487	0.788936	0.00577482	0.682232	0.000398957
CSA003262.1	DNA primase small subunit	3	3	56.559	26.87	4.8	2	3	2	2.3149	4.8	2	3	2	5.5612	4.8	2	2	2	2.218	2.18	2.195	0.256	0.294	0.28	0.116	0.129	0.124	0.125891	2.64831e-08	0.0559685	6.02806e-09	0.444578	0.000195623
CSA003267.1	2-succinylbenzoate--CoA ligase, chloroplastic/peroxisomal isoform X1	2	2	57.901	3.6903	2.7	1	1	1	3.8621	2.7	1	1	1						1.157	0.846		0.91	1.013		0.879	1.199		0.96006	0.829849	1.03744	0.881984	1.0806	0.690027
CSA003272.1	3-oxoacyl-[acyl-carrier-protein] synthase I, chloroplastic	3	1	54.055	9.0618	4.7	2	2	2	4.4089	6.3	3	3	2	3.522	5.7	3	3	1	0.786			1.784			0.449			2.26972		0.571247		0.251682
CSA003275.1	transglutaminase family protein	3	3	33.862	1.9285	5.5	2	2	2	1.9168	3.1	1	2	1	2.6918	3.1	1	2	1	0.663	0.687	0.604	1.001	1.188	1.263	1.466	1.23	1.264	1.76663	0.00363016	2.02661	0.00100081	1.14716	0.189381
CSA003284.1	DIS3-like exonuclease 2 isoform X1	3	3	127.09	3.4856	1.4	2	2	2	23.384	4.4	5	6	5	4.9378	2.1	3	4	3	1.159	0.854	1.104	1.131	1.058	1.104	0.639	1.14	0.781	1.05646	0.57507	0.821303	0.351358	0.777407	0.180027
CSA003295.1	probable LRR receptor-like serine/threonine-protein kinase At1g51880 isoform X1	3	2	42.667	5.881	3.9	1	1	1	10.28	3.9	1	1	1	16.551	3.9	1	1	1		1.037	1.032		1.001	1.012		0.947	0.942	0.972934	0.0435382	0.913001	0.00153965	0.9384	0.00936218
CSA003297.1	RNA-dependent RNA polymerase 2	3	3	126.72	2.805	1.1	1	1	1	2.8243	1.1	1	1	1	2.5734	1.1	1	1	1	1.402	1.364	1.222	0.906	0.821	0.863	0.544	0.689	0.84	0.649448	0.00148341	0.519809	0.00326582	0.800386	0.124612
CSA003306.1	protein QUIRKY-like	3	2	87.605	4.3462	4.8	3	5	1	3.6413	4.7	3	5	2	6.2349	7.5	4	4	2	1.436		1.024	0.865		0.929	0.542		1.044	0.729268	0.251277	0.644715	0.310629	0.884058	0.720916
CSA003308.1	serine/threonine-protein phosphatase PP-X isozyme 2	2	2	36.492	11.373	12.2	3	5	2	14.052	15.3	4	6	3						1.06	1.033		1.011	0.988		0.906	0.967		0.955088	0.11775	0.894888	0.0809368	0.936968	0.192971
CSA003309.1	syntaxin-51-like	3	3	28.161	42.131	37.6	9	15	7	38.576	33.3	7	13	6	63.507	45.9	10	15	7	1.014	0.993	1.027	0.953	0.98	0.975	1.079	1.032	1.054	0.958471	0.031342	1.04318	0.0601579	1.08838	0.00575081
CSA003314.1	uncharacterized ATP-dependent helicase C29A10.10c isoform X2	3	0	154.02	2.617	1.1	2	2	2	2.4541	1.1	2	2	2	3.0172	1.1	2	2	2
CSA003315.1	peroxidase 42	3	3	37.589	71.384	33.6	8	15	8	104.03	33.6	8	12	8	60.807	37.5	9	14	9	1.249	1.241	1.181	1.137	1.147	1.132	0.507	0.542	0.612	0.930537	0.017839	0.452465	5.82388e-05	0.486241	4.75202e-05
CSA003317.1	calcium-dependent protein kinase 2-like isoform X1	3	3	80.652	10.952	10.5	6	8	3	16.967	10.6	6	8	5	30.96	14.7	7	9	5	1.047	1.064	0.987	0.941	0.973	0.963	0.994	0.955	1.058	0.928664	0.043076	0.970626	0.469849	1.04519	0.240643
CSA003321.1	isoaspartyl peptidase/L-asparaginase 1	3	2	33.59	4.3445	18.2	5	7	1	32.537	25.2	7	10	1	34.764	31.8	8	10	2	1.302	1.208		0.857	0.872		0.736	0.852		0.688845	0.014532	0.632669	0.0252349	0.91845	0.35129
CSA003322.1	isoaspartyl peptidase/L-asparaginase 1	3	0	28.842	16.22	25	6	9	2	3.6844	29	7	10	1	2.4348	29	7	11	1
CSA003326.1	magnesium protoporphyrin IX methyltransferase, chloroplastic-like	3	3	38.96	25.21	19.7	8	13	8	23.719	23.8	8	11	8	41.046	19.7	7	8	7	0.91	1.078	0.927	1.058	1.01	1.105	0.943	0.867	0.928	1.08851	0.225207	0.93928	0.368271	0.862906	0.015686
CSA003327.1	plant/MHJ24-14 protein	1	1	8.2635						7.4076	28.8	1	1	1							1.625			0.812			0.338		0.499692		0.208		0.416256
CSA003329.1	serine/threonine-protein phosphatase 6 regulatory ankyrin repeat subunit B-like	3	2	52.208	6.3098	6.5	3	3	3	2.4107	2.5	1	1	1	4.1893	4.2	2	2	2	0.928	0.981		1.013	0.909		1.087	1.125		1.00681	0.921491	1.15872	0.0433354	1.15088	0.12008
CSA003333.1	eukaryotic translation initiation factor 2 subunit alpha-like	3	2	39.029	11.163	22.1	8	11	3	11.642	14.8	6	8	2	10.449	14.5	6	9	2	1.421	1.524		0.766	0.65		0.669	0.653		0.480815	0.0101374	0.448896	0.00409936	0.933616	0.506356
CSA003336.1	vesicle-associated membrane protein 725	1	1	15.091						1.2474	34.8	5	12	1							1.094			0.827			1.057		0.755941		0.966179		1.27811
CSA003339.1	subtilisin-like protease SBT2.5 isoform X3	3	3	43.666	3.4495	4.2	2	3	2	20.317	6.7	2	2	2	3.453	4.2	2	2	2	1.171	0.833	1.023	1.223	1.131	1.251	0.522	1.089	0.697	1.19095	0.138495	0.762471	0.284459	0.640222	0.0652955
CSA003340.1	subtilisin-like protease	3	3	46.911	44.849	15.9	5	6	5	77.27	18.5	6	8	6	29.722	19.1	6	7	6	1.047	0.921	1.182	1.148	1.051	1.1	0.712	1.054	0.641	1.0473	0.570148	0.764127	0.16978	0.729615	0.0849848
CSA003342.1	thioredoxin superfamily protein	3	3	8.2644	3.7728	22.9	2	2	2	2.9706	22.9	2	2	2	4.1891	22.9	2	2	2	0.975	0.959	0.852	1.084	1.096	1.135	0.945	0.952	1.059	1.18988	0.0132403	1.06102	0.348434	0.891704	0.0401892
CSA003346.1	soluble inorganic pyrophosphatase 1, chloroplastic-like	3	3	18.364	10.559	12.7	2	4	2	30.087	19.4	3	4	2	20.865	19.4	3	4	1	0.682	0.703	0.789	1.033	1.07	1.069	1.403	1.346	1.217	1.45906	0.000678057	1.82429	0.000734474	1.25032	0.0093292
CSA003354.1	probable 2,3-bisphosphoglycerate-independent phosphoglycerate mutase	3	2	53.201	14.963	10.9	4	5	4	16.031	6.4	3	3	3	8.341	3.2	1	1	1	1.033	1.124		1.173	1.114		0.767	0.706		1.06027	0.353418	0.682893	0.0247065	0.644075	0.0106953
CSA003357.1	acyl-protein thioesterase 2 isoform X1	1	0	27.429	3.0224	9.7	2	2	1
CSA003360.1	protein TIC 55, chloroplastic	3	3	63.052	55.987	23.1	13	18	8	81.321	21.5	13	17	8	42.266	19.9	12	18	8	0.527	0.546	0.597	1.172	1.14	1.089	1.323	1.433	1.367	2.03653	5.52813e-05	2.46886	2.8145e-05	1.21229	0.00386922
CSA003362.1	aspartyl protease family protein At5g10770	3	3	44.369	176.52	34	10	24	10	256.34	36.3	12	24	12	119.05	36.3	12	23	12	0.615	0.604	0.58	1.388	1.404	1.348	1.146	1.133	1.128	2.30128	2.3775e-06	1.89383	1.33156e-06	0.822947	0.000152502
CSA003368.1	agmatine deiminase	3	3	41.665	135.47	40.4	11	17	11	218.05	44.9	11	18	11	70.815	29.9	9	16	9	0.684	0.72	0.655	1.005	1.012	0.981	1.454	1.335	1.534	1.45605	0.000118306	2.09956	0.000242094	1.44196	0.00165653
CSA003370.1	NtPRp27-like protein precursor	2	2	26.041	2.3676	18	4	4	1	3.1427	17.5	4	4	1						1.835	1.878		0.463	0.439		0.424	0.392		0.24293	0.000306754	0.219768	0.000342149	0.904656	0.164537
CSA003372.1	probable RNA-dependent RNA polymerase 5 isoform X1	3	2	57.925	2.684	2.5	1	1	1	1.9784	2.5	1	1	1	2.8614	2.5	1	1	1		1.4	1.304		0.752	0.877		0.714	0.713	0.602441	0.0208266	0.527737	0.0056046	0.875998	0.247483
CSA003377.1	probable xyloglucan endotransglucosylase/hydrolase protein 25	3	3	20.345	24.237	7.3	1	3	1	52.414	7.3	1	2	1	29.403	12.3	2	4	1	0.959	0.961	0.962	1.043	1.101	1.057	1.01	0.946	0.98	1.11069	0.0037038	1.01874	0.385853	0.917213	0.0255268
CSA003378.1	probable WRKY transcription factor 4	3	2	10.733	3.0532	9.3	1	1	1	3.2009	18.6	2	2	2	1.5065	18.6	2	2	2		1.199	1.277		1.019	0.873		0.704	0.754	0.764136	0.0717943	0.588853	0.00818161	0.770613	0.106602
CSA003382.1	probable receptor-like protein kinase At5g47070 isoform X3	3	3	47.914	15.338	10.2	4	4	4	13.409	12.5	5	5	5	5.2164	5.3	2	2	1	0.878	0.913	0.985	1.157	1.077	1.019	0.999	1.045	1	1.17183	0.0354334	1.09654	0.0629521	0.935752	0.178793
CSA003384.1	ABC transporter I family member 1	1	1	25.561						1.3555	7.5	2	2	2							0.911			0.974			1.151		1.06915		1.26345		1.18172
CSA003387.1	centrosomal protein	3	3	11.084	2.7118	9.6	1	2	1	2.4058	9.6	1	2	1	8.6513	9.6	1	2	1	0.754	0.795	0.833	1.025	0.951	0.993	1.314	1.336	1.239	1.24643	0.00333718	1.63266	0.000173692	1.30987	0.00108098
CSA003389.1	protein strawberry notch isoform X1	3	2	154.14	2.7688	0.7	1	1	1	3.497	1.5	2	2	2	4.9379	1.6	2	2	2		1.245	1.343		0.928	0.949		0.739	0.58	0.72527	0.0192973	0.50966	0.0209834	0.702717	0.0736059
CSA003391.1	UPF0678 fatty acid-binding protein-like protein At1g79260	3	3	23.15	7.3461	16.1	3	4	3	10.657	16.1	3	6	3	7.9881	16.1	3	4	3	0.742	0.764	0.725	0.882	0.894	0.757	1.485	1.442	1.643	1.13537	0.0900694	2.04841	0.000232203	1.80418	0.000832764
CSA003393.1	zinc finger CCCH domain-containing protein 37 isoform X1	3	3	59.017	131.13	25.5	9	10	9	130.42	23.4	7	10	7	95.301	18.6	5	6	5	1.202	1.222	1.247	0.954	1.016	1.016	0.724	0.748	0.705	0.813402	0.000729042	0.593026	1.01659e-05	0.729069	0.000364504
CSA003397.1	PAP-specific phosphatase HAL2-like	3	1	33.128	3.2649	8	2	3	2	2.4067	3.7	1	2	1	4.1077	8.4	2	2	2		1.269			1.067			0.555		0.84082		0.437352		0.52015
CSA003404.1	probable carotenoid cleavage dioxygenase 4, chloroplastic	3	3	15.101	16.002	30.4	5	6	5	18.562	52.6	7	10	7	14.036	46.7	6	7	6	0.641	0.443	0.357	1.187	1.194	1.361	1.296	1.583	1.403	2.59681	0.00164395	2.97155	0.00133637	1.14431	0.149991
CSA003405.1	probable carotenoid cleavage dioxygenase 4, chloroplastic	3	0	13.646	3.1939	11.6	1	1	1	2.202	9.9	1	1	1	4.5191	11.6	1	1	1
CSA003406.1	probable carotenoid cleavage dioxygenase 4, chloroplastic	3	3	42.432	16.297	11.4	4	4	4	13.947	11.4	4	5	4	9.1336	11.4	4	4	4	0.467	0.525	0.47	1.263	1.324	1.255	1.454	1.308	1.457	2.62791	1.03492e-05	2.88577	6.33161e-05	1.09813	0.0796884
CSA003408.1	SH3 domain protein	3	3	146.13	23.313	6.5	7	10	7	49.146	9.4	10	12	10	24.579	6.8	8	11	8	1.018	0.99	1.043	1.082	1.028	1.13	0.882	0.975	0.849	1.06195	0.130613	0.886922	0.0475939	0.835185	0.0204953
CSA003409.1	SH3 domain-containing protein	3	2	14.216	2.5061	8.5	1	1	1	13.971	31.8	3	3	3	3.9837	11.6	1	1	1	1.045	1.016		1.21	1.121		0.712	0.847		1.131	0.102113	0.756429	0.0680279	0.668812	0.0411795
CSA003410.1	SH3 domain protein	1	1	15.466											3.6852	10.3	1	1	1			1.067			1.01			0.897	0.946579		0.840675		0.888119
CSA003415.1	geranylgeranyl pyrophosphate synthase, chloroplastic-like	3	3	40.687	9.348	11.2	4	6	3	11.726	12.8	4	8	4	8.8164	11.2	4	7	3	0.942	0.916	0.935	1.291	1.234	1.225	0.77	0.855	0.837	1.34264	0.000133322	0.881489	0.015023	0.656533	0.000203891
CSA003420.1	THO complex subunit 5B isoform X1	3	3	91.87	7.7854	3.8	3	3	3	13.866	5	4	5	4	10.712	4.8	5	6	5	1.044	1.026	1.049	0.958	0.943	1.011	0.984	1.026	0.921	0.933633	0.0339055	0.939724	0.115846	1.00652	0.871817
CSA003423.1	bZIP transcription factor TRAB1-like	3	2	48.585	4.1473	5.4	2	2	2	5.5508	3.3	1	1	1	11.699	8.3	3	3	3		0.912	0.989		1.021	1.082		1.099	0.926	1.10626	0.176052	1.06523	0.579823	0.96291	0.712065
CSA003426.1	succinate dehydrogenase assembly factor 1, mitochondrial	3	2	16.478	2.6166	8.4	1	1	1	2.3278	8.4	1	1	1	2.5481	8.4	1	2	1		1.01	0.971		1.069	1.097		0.912	0.936	1.09339	0.0612281	0.932862	0.10092	0.853186	0.0131835
CSA003431.1	fatty-acid-binding protein 1	3	3	24.512	62.359	34.5	7	8	7	95.34	39.1	7	9	7	97.63	32.7	6	8	6	0.88	0.894	0.883	1.058	1.036	1.054	1.127	1.118	1.149	1.18479	3.35959e-05	1.27738	1.72418e-05	1.07814	0.00199647
CSA003432.1	mediator of RNA polymerase II transcription subunit 36a-like	3	3	34.446	135.98	35.9	12	28	12	137.62	41.7	13	32	13	144.18	41.7	13	32	13	1.488	1.387	1.389	0.813	0.82	0.806	0.498	0.617	0.645	0.571998	5.46084e-05	0.412758	0.000118475	0.721607	0.00747777
CSA003434.1	mediator of RNA polymerase II transcription subunit 15a-like isoform X1	1	1	105.3	3.4616	1.3	1	1	1											1.285			0.924			0.686			0.719066		0.533852		0.742424
CSA003435.1	NADP-dependent D-sorbitol-6-phosphate dehydrogenase	3	3	17.154	40.267	35.3	4	7	4	14.609	29.4	5	7	5	69.014	35.9	5	9	5	0.973	1.045	1.119	0.993	1	1.024	1.007	0.958	0.84	0.961747	0.406698	0.894166	0.164163	0.929732	0.233842
CSA003436.1	NADP-dependent D-sorbitol-6-phosphate dehydrogenase	3	3	21.796	43.762	28.2	5	5	5	107.53	36.4	7	8	7	77.311	35.9	7	8	7	1.031	1.013	1.012	1.014	1.008	1.017	0.915	0.951	0.965	0.994437	0.44634	0.926374	0.00964489	0.931556	0.0101535
CSA003455.1	uncharacterized mitochondrial protein AtMg01250-like	1	1	21.112	2.7835	10.9	1	1	1											0.956			1.1			0.953			1.15063		0.996862		0.866364
CSA003460.1	uncharacterized GTP-binding protein At5g64813	3	3	29.979	7.2362	8.4	2	2	2	7.6564	8.4	2	3	2	6.9159	8.4	2	2	2	1.389	1.217	1.271	0.95	1.006	0.977	0.516	0.693	0.65	0.756513	0.00411856	0.479494	0.000796204	0.633822	0.00301261
CSA003471.1	glutathione S-transferase F9	3	3	19.368	9.7555	26.3	5	7	4	15.369	31.7	7	11	5	15.262	26.9	6	7	4	0.835	0.806	0.9	0.831	0.876	0.912	1.373	1.429	1.232	1.0307	0.513975	1.58756	0.00155138	1.54028	0.00171417
CSA003472.1	UDP-glucuronate 4-epimerase 1	1	1	47.575	3.6995	3	1	1	1											1.122			0.987			0.844			0.879679		0.752228		0.855117
CSA003473.1	4-coumarate--CoA ligase-like 7	3	3	59.462	136.1	32.5	13	16	13	174.56	35.5	15	22	15	115.21	34.9	14	21	14	0.762	0.771	0.786	1.021	1.006	1.032	1.264	1.255	1.27	1.3191	1.79259e-05	1.63389	4.80358e-07	1.23864	9.74389e-06
CSA003475.1	bifunctional phosphatase IMPL2, chloroplastic	2	1	20.258	6.2269	7.2	1	1	1						2.573	7.2	1	2	1	0.935			1.044			1.043			1.11658		1.11551		0.999042
CSA003477.1		1	1	10.389	-2	9.8	1	1	1											0.965			1.222			0.81			1.26632		0.839378		0.662848
CSA003478.1	putative disease resistance protein At1g50180 isoform X1	3	3	39.055	6.9947	13.1	4	4	2	5.223	10.5	4	4	3	7.5659	13.1	4	4	2	1.082	1.199	1.27	1.145	1.071	1.191	0.731	0.648	0.421	0.959448	0.501259	0.506899	0.0056099	0.528324	0.00565685
CSA003479.1	26S protease regulatory subunit S10B homolog B	3	2	39.317	323.31	71.9	21	47	12	316.48	70.7	20	49	8	323.31	67.6	19	45	0	1.18	1.169		0.997	0.995		0.788	0.781		0.84802	0.000979344	0.667944	0.000279304	0.787651	0.000296075
CSA003480.1		1	1	8.8899						2.2715	22.7	2	2	2							1.097			1.019			0.845		0.928897		0.770283		0.829244
CSA003481.1	SUMO-activating enzyme subunit 2	3	3	75.227	212.64	28.9	15	22	15	221.92	23.5	12	18	12	252.94	31	15	22	15	1.027	1.101	1.111	1.103	1.074	1.098	0.885	0.774	0.779	1.01111	0.689918	0.752701	0.0039969	0.744427	0.00170563
CSA003482.1	leucine-rich repeat extensin-like protein 4	3	3	71.395	4.4076	3.4	2	4	2	8.4276	3.4	2	4	2	12.667	5.8	3	4	3	0.727	0.808	0.731	1.142	1.023	1.163	1.224	1.241	1.205	1.46867	0.00225259	1.61959	7.86936e-05	1.10276	0.0637169
CSA003489.1	nicastrin isoform X2	3	1	29.59	3.3625	5.1	1	1	1	1.1652	3.3	1	1	1	3.8324	5.1	1	1	1	1.006			0.999			0.993			0.993042		0.987078		0.993994
CSA003493.1	nicastrin	3	0	27.45	7.5832	7.2	1	1	1	22.998	7.2	1	1	1	14.921	7.2	1	1	1
CSA003504.1	putative E3 ubiquitin-protein ligase XBAT31	1	0	48.566											1.6975	2.5	1	1	1
CSA003506.1	probable tRNA N6-adenosine threonylcarbamoyltransferase	1	0	31.394						3.3814	21.6	5	6	0
CSA003509.1	endochitinase EP3-like	3	3	25.194	62.086	17.6	2	3	2	118.1	18	3	4	3	174.94	17.6	2	3	2	0.885	0.901	0.937	1.115	1.105	1.136	1.035	1.024	0.94	1.23246	0.000295459	1.10136	0.0525008	0.893623	0.0191953
CSA003511.1	endochitinase EP3	3	3	37.857	1.8977	3	1	1	1	2.2551	3	1	2	1	1.4562	3	1	1	1	0.52	0.407	0.404	1.097	1.054	1.008	1.56	1.762	1.815	2.3734	0.000187999	3.8595	0.000126096	1.62615	0.00128826
CSA003515.1	abscisic acid receptor PYL9	1	0	20.338	4.8355	11.9	2	2	2
CSA003518.1	protein SLOW GREEN 1, chloroplastic-like	3	3	36.412	34.428	17.4	4	4	4	5.9817	3.4	1	1	1	54.837	17.1	4	5	4	0.9	0.911	0.932	1.071	1.053	1.07	1.051	1.065	1.033	1.16442	0.000169329	1.14801	0.000508247	0.985911	0.242568
CSA003523.1	transcription initiation factor TFIID subunit 5	3	3	87.076	9.2397	4.3	3	4	3	7.7873	3.2	2	2	2	11.586	3.7	2	2	2	1.087	1.021	1.042	1.005	0.975	1.007	0.874	0.998	0.935	0.948254	0.069368	0.891111	0.0485227	0.939739	0.18265
CSA003537.1	probable protein phosphatase 2C 59 isoform X3	2	2	10.832	24.821	12.9	1	1	1						6.0891	12.9	1	1	1	0.893		0.832	0.995		0.955	1.153		1.281	1.13043	0.0909888	1.41101	0.0377456	1.24821	0.0689277
CSA003540.1	protein TIC 55, chloroplastic	3	3	47.066	10.288	26.2	10	12	5	10.879	22.1	8	11	3	25.397	24.5	8	11	4	0.801	0.81	0.684	1.058	0.957	0.901	1.213	1.31	1.544	1.27059	0.0278628	1.77211	0.00513365	1.39472	0.0240638
CSA003541.1	protein TIC 55, chloroplastic	3	3	27.565	2.5105	3.7	1	1	1	4.2202	3.7	1	1	1	2.4771	3.7	1	1	1	0.504	0.609	0.59	1.225	1.12	1.121	1.444	1.412	1.436	2.03523	0.000245448	2.52026	1.38158e-05	1.23832	0.00159305
CSA003554.1	3-ketoacyl-CoA synthase 6	3	3	56.073	20.185	11.5	5	8	4	24.927	12.1	6	6	5	17.773	8.9	4	5	3	1.263	1.281	1.395	0.804	0.832	0.848	0.847	0.793	0.617	0.630617	0.000361161	0.572988	0.00226599	0.908615	0.344302
CSA003557.1	60S ribosomal protein L21-1	3	3	18.679	14.678	39	8	17	8	19.6	36.6	7	13	7	21.203	34.8	7	20	7	1.518	1.576	1.482	0.875	0.879	0.89	0.445	0.332	0.412	0.577797	2.04225e-05	0.259834	1.28598e-05	0.449697	0.000137799
CSA003562.1	wall-associated receptor kinase-like 20	3	2	41.7	5.5859	4.8	2	2	2	6.3383	4.8	2	2	2	3.8617	4.8	2	2	2		0.836	0.751		0.833	0.97		1.408	1.377	1.13611	0.312269	1.75488	0.00565538	1.54465	0.0198527
CSA003567.1	chlorophyll a-b binding protein of LHCII type 1	2	2	25.842	5.4322	7.2	2	2	2						1.7326	4.2	1	1	1	0.816		0.818	0.667		0.733	1.614		1.54	0.856793	0.0712238	1.93023	0.00236348	2.25286	0.00318058
CSA003571.1	transcriptional corepressor LEUNIG isoform X1	2	1	65.766						14.244	9.3	5	5	2	11.307	7.9	4	4	2		1.026			0.963			1.004		0.938596		0.978558		1.04258
CSA003579.1	alpha-L-fucosidase 2-like isoform X2	3	3	39.327	79.786	34.6	10	12	8	46.949	28.3	8	9	6	70.909	32.3	9	10	8	1.055	0.991	1.055	1.05	1.061	1.07	0.868	0.925	0.872	1.0258	0.294114	0.8594	0.00668701	0.837787	0.000869104
CSA003580.1	alpha-L-fucosidase 2 isoform X2	3	3	32.01	18.675	8.5	2	3	2	30.353	12.8	3	5	3	24.901	8.5	2	4	2	1.109	1.058	1.057	1.017	1.078	1.023	0.831	0.835	0.89	0.967122	0.244432	0.792804	0.000966891	0.819756	0.00232523
CSA003581.1	alpha-L-fucosidase 2	1	0	10.83						-2	18.4	2	2	1
CSA003592.1	translation initiation factor IF-2-like	3	1	53.018	3.1616	3.6	2	2	1	2.4415	2	1	1	1	2.1824	6.2	3	3	1			1.21			0.986			0.725	0.814876		0.599174		0.735294
CSA003595.1	transcription initiation factor IIB-2	3	1	34.246	8.1783	13.8	4	5	3	6.4214	9	3	4	3	9.8658	14.1	4	5	4		1.353			0.803			0.725		0.593496		0.535846		0.902864
CSA003599.1	protein TRIGALACTOSYLDIACYLGLYCEROL 1, chloroplastic isoform X1	2	2	42.877	10.909	5.6	1	1	1	1.4178	2	1	1	1						0.887	0.92		0.972	0.905		1.186	1.214		1.03874	0.447567	1.32817	0.00528415	1.27864	0.0187375
CSA003603.1	39S ribosomal protein L22, mitochondrial-like	3	2	30.096	4.1712	8.5	2	2	2	3.0658	4.8	1	3	1	3.4148	4.8	1	1	1		1.254	1.322		1.188	1.242		0.446	0.295	0.943323	0.23471	0.287655	0.00804652	0.304938	0.0088948
CSA003606.1	dihydroneopterin aldolase 2	3	3	8.6778	25.957	55.8	3	3	3	17.386	55.8	3	5	3	3.4569	15.6	1	1	1	0.85	0.926	0.919	1.034	0.969	1.045	1.17	1.135	1.064	1.13098	0.0256039	1.25009	0.00471949	1.10531	0.0523702
CSA003608.1	heparanase-like protein 3	1	0	51.202						1.7608	3.5	2	2	1
CSA003626.1	cytochrome P450 87A3-like	1	1	55.328	6.4029	7	3	3	3											0.42			0.847			1.967			2.01667		4.68333		2.32231
CSA003650.1	ferredoxin-dependent glutamate synthase, chloroplastic	3	3	15.708	8.0757	34	3	5	3	25.87	42.4	4	10	4	13.714	31.2	4	7	4	0.45	0.402	0.512	0.927	0.949	0.992	1.857	1.847	1.684	2.10264	0.000173981	3.95015	3.15598e-05	1.87866	0.000143568
CSA003651.1	Ferredoxin-dependent glutamate synthase 2	3	3	24.19	75.277	50	10	21	10	87.453	46.7	10	24	10	68.238	50	11	24	11	0.513	0.4	0.368	0.969	0.934	0.927	1.781	1.973	1.98	2.20921	0.00035453	4.47619	4.64126e-05	2.02615	0.000129382
CSA003652.1	ferredoxin-dependent glutamate synthase, chloroplastic-like, partial	3	3	13.518	16.544	42.7	4	9	4	25.769	42.7	4	8	4	37.179	42.7	4	10	4	0.547	0.41	0.401	0.953	0.958	0.941	1.702	1.853	1.843	2.10015	0.000468118	3.97496	3.8094e-05	1.89271	6.5288e-05
CSA003653.1	ferredoxin-dependent glutamate synthase, chloroplastic	1	1	21.945						1.1506	3.4	1	1	1							0.316			0.831			2.128		2.62975		6.73418		2.56077
CSA003654.1	ferredoxin-dependent glutamate synthase, chloroplastic	3	3	115.08	323.31	46.2	38	76	38	323.31	48.2	40	81	40	323.31	48.8	39	78	39	0.493	0.46	0.461	0.959	0.929	0.94	1.781	1.769	1.8	2	4.55942e-06	3.78359	8.00392e-08	1.8918	3.00291e-07
CSA003655.1	deoxyuridine 5'-triphosphate nucleotidohydrolase-like	3	3	27.806	73.897	41.6	7	9	7	65.391	30.4	5	8	5	66.31	31.1	5	7	5	1.919	1.844	1.906	0.377	0.487	0.495	0.349	0.387	0.292	0.239725	5.5128e-06	0.181337	1.75741e-06	0.756439	0.0788403
CSA003656.1	probable methyltransferase PMT13	3	2	51.969	4.7393	6.1	2	2	2	8.7846	9.8	5	5	5	4.6708	9.3	4	4	4	1.123	1.2		0.986	0.889		0.846	0.843		0.807146	0.0686453	0.727077	0.0144533	0.9008	0.19534
CSA003657.1	glucose-induced degradation protein 8 homolog isoform X1	3	3	32.083	101.45	56.1	11	15	8	177.68	48.8	9	13	7	140.6	43.2	9	13	6	0.969	1.026	1.04	1.002	1.002	0.981	1.029	0.976	0.97	0.983526	0.505531	0.980231	0.524073	0.99665	0.875786
CSA003658.1	ribulose bisphosphate carboxylase/oxygenase activase, chloroplastic isoform X1	3	3	54.465	323.31	66.3	25	163	10	323.31	71.2	28	165	11	323.31	67.9	26	165	10	0.464	0.519	0.46	1.089	1.097	1.103	1.618	1.574	1.644	2.27928	5.96469e-06	3.35135	2.22002e-06	1.47036	1.57943e-05
CSA003661.1	serine/arginine repetitive matrix protein 1 isoform X3	1	1	100.91	2.4421	1.3	1	1	1											0.993			1.369			0.612			1.37865		0.616314		0.447042
CSA003662.1	ribulose bisphosphate carboxylase/oxygenase activase, chloroplastic isoform X2	3	3	48.053	323.31	69.9	25	231	10	323.31	74	29	205	12	323.31	71.7	27	198	11	0.47	0.438	0.418	0.929	0.93	0.922	1.786	1.82	1.856	2.09729	5.98254e-06	4.11916	6.74034e-07	1.96404	1.61279e-06
CSA003663.1	D-xylose-proton symporter-like 3, chloroplastic	3	3	59.561	18.19	5.4	3	8	3	10.533	5.4	3	7	3	25.129	6.6	4	10	4	0.522	0.597	0.494	0.875	0.84	0.846	1.794	1.703	1.853	1.58772	0.000633353	3.3168	1.99801e-05	2.08903	3.22777e-05
CSA003667.1	serine/threonine-protein kinase SMG1-like	1	0	390.59											1.6061	0.4	1	1	1
CSA003672.1	zinc transporter 2	2	0	36.505	2.5849	4.5	1	1	1	2.0264	4.5	2	2	2
CSA003683.1	transcription factor bHLH137	3	2	14.102	9.4833	10	2	3	2	11.255	10	2	2	2	5.7853	10	2	2	2		1.399	1.409		0.962	1.081		0.488	0.347	0.727564	0.0235124	0.297365	0.00509372	0.408713	0.0225424
CSA003686.1	phospholipase D beta 1-like	2	2	33.617	4.0623	12.5	3	4	2	2.8212	4	1	1	1						0.726	1.163		0.836	0.953		1.556	0.825		0.947062	0.845571	1.26046	0.621843	1.33091	0.507787
CSA003688.1	ferredoxin--NADP reductase, root isozyme, chloroplastic isoform X2	3	3	42.596	93.964	31.7	10	15	10	115.04	33.9	11	15	11	131.55	32	10	15	10	0.878	0.899	0.859	1.057	1	1.093	1.088	1.103	1.096	1.19499	0.00433809	1.24697	6.13715e-05	1.04349	0.171135
CSA003693.1	reticulon-like protein B2	3	1	27.562	6.9046	10.8	2	2	1	7.3227	10.8	2	3	1	6.0873	10.8	2	2	1	0.829			1.047			1.186			1.26297		1.43064		1.13276
CSA003697.1	calcium-dependent protein kinase 1-like	3	3	57.144	69.005	40	14	20	14	155.67	43.2	17	27	17	92.158	38.4	15	23	15	1.017	0.999	1.004	0.893	0.907	0.868	1.061	1.083	1.122	0.883444	0.000741234	1.08146	0.0116667	1.22414	0.000709322
CSA003707.1	flavonol synthase/flavanone 3-hydroxylase-like	3	3	37.611	270.65	55.6	16	39	16	323.31	46.8	15	40	15	296.98	46.8	15	43	15	1.626	1.657	1.586	0.549	0.55	0.596	0.583	0.608	0.623	0.348121	2.09453e-06	0.372561	1.73378e-06	1.07021	0.110385
CSA003710.1	transmembrane emp24 domain-containing protein p24delta3	3	1	33.929	2.9581	3.9	1	1	1	3.7526	3.9	2	2	2	2.9708	3.9	1	1	1		0.972			1.007			1.031		1.03601		1.0607		1.02383
CSA003718.1	luc7-like protein 3	2	0	43.079	2.2769	3.8	1	1	1						2.6092	3.8	1	1	1
CSA003722.1	trypsin family protein	2	2	65.678						10.071	2.7	1	1	1	26.226	7.5	3	3	1		0.981	1.166		1.063	0.968		0.958	0.805	0.945971	0.633095	0.821146	0.250828	0.868045	0.275125
CSA003724.1	U1 small nuclear ribonucleoprotein A-like	3	3	27.341	15.279	16.8	4	5	3	40.491	16.8	4	6	3	63.506	23	6	10	3	1.005	1.105	1.071	0.994	1.044	0.993	1	0.809	0.908	0.952845	0.213607	0.854134	0.0685318	0.896404	0.143679
CSA003727.1	mediator of RNA polymerase II transcription subunit 28-like	2	0	17.557	3.602	6.6	1	1	1	2.1401	6.6	1	1	1
CSA003732.1	thylakoid lumenal 15 kDa protein 1, chloroplastic-like isoform X2	3	3	14.679	4.9477	8.1	1	2	1	5.703	8.1	1	1	1	3.5266	8.1	1	1	1	0.674	0.661	0.68	1.014	0.901	0.919	1.437	1.576	1.53	1.40645	0.001538	2.25459	3.39617e-05	1.60303	0.000451948
CSA003733.1	thylakoid lumenal 15 kDa protein 1, chloroplastic	3	3	14.703	184.24	47.1	5	9	5	245.92	47.1	5	10	5	189.98	47.1	5	11	5	0.663	0.66	0.627	0.94	0.953	0.948	1.521	1.522	1.697	1.45692	1.65542e-05	2.43077	9.86668e-05	1.66843	0.000417232
CSA003736.1	chromatin remodeling protein EBS	3	1	20.574	5.6279	19.2	3	3	3	10.449	19.2	3	4	3	4.1172	12.4	2	2	2		1.283			0.926			0.689		0.721746		0.537023		0.74406
CSA003737.1	serine/threonine protein phosphatase 2A 59 kDa regulatory subunit B' gamma isoform-like	3	3	61.945	11.524	9.9	5	5	2	15.13	9.9	6	6	5	10.321	7.5	4	4	2	1.042	1.217	0.95	1.013	0.951	1.078	0.928	0.786	0.985	0.947959	0.554764	0.841072	0.158295	0.887245	0.175819
CSA003738.1	lycopene beta/epsilon cyclase	2	2	68.04	6.0442	5.3	3	3	3	2.2727	2.6	2	2	2						0.77	0.666		1.006	1.055		1.312	1.403		1.43524	0.0322097	1.89067	0.0114736	1.31732	0.0240762
CSA003745.1	probable dolichyl-diphosphooligosaccharide--protein glycosyltransferase subunit 3B	3	1	39.733	2.1301	2.5	1	1	1	2.3714	5.6	2	2	2	3.5865	5.6	2	2	2	1.161			1.049			0.725			0.903531		0.624462		0.691134
CSA003754.1	uncharacterized mitochondrial protein AtMg00810-like	1	1	17.557						-2	7.1	1	1	1							0.199			1.055			2.048		5.30151		10.2915		1.94123
CSA003757.1	probable fructokinase-7	3	3	36.406	39.541	32	8	10	8	18.237	28.2	7	10	6	4.2692	7.4	2	2	1	1.192	1.081	1.11	0.924	0.968	1.135	0.821	0.879	0.703	0.894768	0.176331	0.710316	0.00605051	0.793855	0.0653422
CSA003762.1	protein FAR1-RELATED SEQUENCE 2	2	1	23.615	1.3718	4.7	1	1	1						2.3283	4.7	1	1	1			1.004			1.09			0.896	1.08566		0.89243		0.822018
CSA003767.1	inositol-tetrakisphosphate 1-kinase 1	3	2	40.975	2.4401	2.5	1	1	1	4.2502	2.5	1	1	1	2.919	2.5	1	1	1		1.192	1.253		1.012	0.964		0.721	0.689	0.80818	0.0263148	0.576687	0.00440029	0.713563	0.0102293
CSA003769.1	UPF0496 protein At4g34320-like	3	3	43.531	23.715	17.4	5	5	5	30.609	12.5	4	4	4	19.659	10.7	3	3	3	0.953	0.931	0.939	1.34	1.298	1.233	0.732	0.774	0.833	1.37124	0.000389347	0.828551	0.0057708	0.604237	0.000281197
CSA003793.1	cyclin-dependent kinase C-1-like	3	2	63.961	8.0869	7	4	5	2	10.971	8.4	5	6	3	7.158	7	4	5	3		1.284	1.327		0.822	0.838		0.8	0.723	0.635772	0.00231941	0.583301	0.00650662	0.91747	0.223631
CSA003796.1	ras-related protein RABH1e	3	3	20.176	4.4467	31.7	5	10	1	4.0347	42.6	7	12	2	7.9149	45.9	7	12	2	0.888	1.035	0.822	1.088	1.016	1.012	1.06	0.935	1.234	1.13515	0.141427	1.17632	0.206588	1.03626	0.697523
CSA003797.1	50S ribosomal protein L23	2	2	21.028	8.0156	14.9	2	2	2						3.2189	6.4	1	1	1	1.188		1.259	1.071		1.097	0.663		0.538	0.885983	0.0662314	0.490805	0.0130513	0.553967	0.0169896
CSA003801.1	nucleoside diphosphate kinase 3-like	3	3	19.797	35.958	45.5	7	11	3	7.8289	33.5	6	11	2	5.1069	26.7	6	11	1	0.72	0.735	0.744	1.056	1.135	1.119	1.301	1.22	1.225	1.50523	0.000122993	1.7035	4.51024e-05	1.13172	0.0150859
CSA003809.1	reticulon-4-interacting protein 1, mitochondrial	1	0	23.709	1.2926	4.8	1	1	1
CSA003811.1	ras-related protein RABA3-like	3	3	26.664	8.4214	25.4	6	10	4	19.576	25.4	6	12	4	11.039	27	6	10	4	1.466	1.414	1.56	0.768	0.774	0.744	0.605	0.672	0.502	0.514865	8.03099e-05	0.400676	0.000170488	0.778215	0.0282784
CSA003815.1		2	1	10.855						15.467	11.9	1	2	1	2.9374	11.9	1	1	1			1.005			1.028			0.963	1.02289		0.958209		0.93677
CSA003816.1	oral cancer-overexpressed protein 1 homolog	1	1	19.298	36.697	16.7	2	2	2											0.887			1.139			1.006			1.2841		1.13416		0.883231
CSA003817.1	formimidoyltransferase-cyclodeaminase-like	3	3	34.463	47.951	37	8	12	8	16.386	29.2	8	10	8	100.1	39.4	9	11	9	0.783	0.773	0.733	1.094	1.122	1.207	1.198	1.151	1.118	1.49541	0.000531063	1.51464	0.000145564	1.01285	0.739516
CSA003818.1	rhodanese-like domain-containing protein 9, chloroplastic	3	3	22.617	12.163	21	4	7	4	19.895	21	4	9	4	21.611	21	4	8	4	0.696	0.675	0.72	0.872	0.841	0.911	1.539	1.609	1.522	1.2549	0.00179439	2.23338	8.39787e-06	1.77973	3.41708e-05
CSA003819.1	rhodanese-like domain-containing protein 9, chloroplastic	1	0	10.984						1.328	8.6	1	1	1
CSA003825.1	DUF3067 family protein	3	1	13.01	10.03	27	3	4	3	15.374	31.5	3	4	3	5.295	20.7	2	2	2			0.797			1.041			1.237	1.30615		1.55207		1.18828
CSA003829.1	superoxide dismutase	3	3	28.259	12.374	22.6	5	7	5	7.1233	16.9	4	6	4	11.357	19.3	4	5	4	0.822	0.869	0.899	1.152	1.171	1.153	0.998	0.984	0.96	1.34208	0.000220965	1.13591	0.00936036	0.846375	0.000150221
CSA003830.1	dihydropyrimidine dehydrogenase (NADP(+)), chloroplastic	3	3	49.522	127.23	31.1	15	22	15	161.17	27.1	12	19	12	151.19	32.9	15	22	15	1.17	1.131	1.161	1.046	1.023	1.029	0.759	0.752	0.752	0.894858	0.000886184	0.653668	4.87694e-06	0.730471	2.78385e-06
CSA003833.1	protein transport protein Sec24-like At4g32640 isoform X1	3	3	116.08	7.5055	6.8	7	9	3	4.627	6.1	7	10	4	16.376	8.9	8	14	5	1.256	1.2	1.153	0.993	0.86	0.964	0.653	0.874	0.803	0.780549	0.00624393	0.645608	0.00399721	0.827121	0.101558
CSA003836.1	fibrous sheath CABYR-binding protein isoform X3	2	1	21.991	2.5141	10.3	2	2	2						2.1774	10.3	2	2	2			1.035			1.045			0.903	1.00966		0.872464		0.864115
CSA003840.1	probable receptor-like protein kinase At5g47070	2	0	24.202	2.6956	4.2	1	1	1	1.9143	4.2	1	1	1
CSA003841.1	probable receptor-like protein kinase At5g47070	1	1	19.013						2.4562	7.7	1	1	1							0.908			1.482			0.607		1.63216		0.668502		0.409582
CSA003843.1	beta-amylase family protein	3	3	61.757	4.7008	3.5	2	2	2	1.4565	1.3	1	1	1	2.6754	4.6	2	2	2	0.454	0.522	0.621	1.623	1.483	1.452	1.083	1.139	1.036	2.8541	0.000159937	2.04008	0.000624455	0.714787	0.00200383
CSA003845.1	poly(U)-specific endoribonuclease-B	3	3	48.411	105.09	32.9	10	12	10	123.73	30.5	8	9	8	134.64	25.4	8	9	8	1.153	1.18	1.118	1.204	1.256	1.291	0.443	0.406	0.498	1.08693	0.0320973	0.390322	2.62705e-05	0.359104	2.62717e-05
CSA003846.1	vacuolar protein sorting protein	3	3	39.405	4.2592	5.2	2	2	2	3.0797	5.2	2	3	2	3.1742	5.2	2	3	2	0.783	0.567	0.597	1.151	1.022	0.949	1.138	1.345	1.3	1.60349	0.0120154	1.94299	0.00268164	1.21172	0.0629911
CSA003852.1	putative vacuolar protein sorting-associated protein 13A	2	2	38.582						1.2853	3.2	1	1	1	1.6448	3.2	1	1	1		0.849	0.947		1.082	1.047		1.12	1.023	1.18541	0.0853409	1.19321	0.128226	1.00658	0.904441
CSA003861.1	syntaxin-41	3	3	36.964	4.2942	8.9	2	2	1	25.134	13.1	3	5	2	12.001	13.1	3	3	2	1.022	1.028	1	0.978	0.978	1.022	0.994	0.968	0.976	0.976393	0.229902	0.963279	0.0312298	0.986568	0.465858
CSA003865.1	glycoprotein 3-alpha-L-fucosyltransferase A-like	2	1	57.446	4.6811	3.9	2	2	2	6.9454	8.2	4	4	4							0.867			1.09			1.087		1.25721		1.25375		0.997248
CSA003866.1	ferredoxin--nitrite reductase, chloroplastic	3	2	65.661	2.2886	3.7	2	2	2	26.534	7.8	4	4	4	13.417	5.5	3	3	3		0.665	0.593		0.977	0.953		1.488	1.614	1.53418	0.0125161	2.46582	0.00613655	1.60725	0.0117664
CSA003867.1	3-hydroxyisobutyryl-CoA hydrolase-like protein 3, mitochondrial isoform X1	3	3	46.864	5.462	10	4	6	2	5.0771	10.2	4	6	2	6.0394	12.6	5	9	2	1.035	1.028	0.965	0.99	1.047	1.03	0.962	0.911	1.016	1.01288	0.665979	0.954095	0.285429	0.941963	0.162509
CSA003910.1	domon-like ligand-binding domain-containing protein precursor	3	3	22.944	14.431	17	2	3	2	19.102	20.8	3	3	3	51.815	31.1	4	5	4	0.915	0.789	0.802	1.071	1.23	1.192	1.042	1.043	1.043	1.39385	0.0062165	1.2482	0.00659772	0.895505	0.0641234
CSA003918.1	domon-like ligand-binding domain-containing protein precursor	3	2	13.421	3.9688	8.1	1	1	1	1.9432	8.1	1	1	1	4.8067	8.1	1	1	1		1.206	1.009		1.12	1.193		0.585	0.78	1.04424	0.686759	0.616253	0.0919177	0.590143	0.0450087
CSA003920.1	pentatricopeptide repeat-containing protein At4g01990, mitochondrial	1	0	54.822	3.0001	5.4	2	2	2
CSA003935.1	calcium-dependent protein kinase 32-like	1	0	41.516						11.006	6.3	2	2	1
CSA003948.1	5'-adenylylsulfate reductase-like 5 isoform X1	2	1	34.604	1.4247	2.6	1	1	1						1.4137	2.6	1	1	1			0.961			1.043			1.007	1.08533		1.04787		0.965484
CSA003952.1	ornithine carbamoyltransferase, chloroplastic	3	3	34.991	63.669	47	11	17	7	77.972	32.9	9	16	5	56.555	35.8	10	17	6	0.942	0.975	0.99	1.109	1.069	1.069	0.925	0.983	0.927	1.11696	0.00433104	0.975232	0.368747	0.873114	0.00409134
CSA003953.1	proteasome subunit alpha type-1-B-like	3	3	13.163	112.77	76.3	7	16	4	75.097	83.9	8	12	4	102.8	83.9	8	15	4	1.188	1.207	1.189	1.095	1.134	1.154	0.638	0.569	0.651	0.943917	0.0219041	0.518415	2.53855e-05	0.549217	7.8745e-05
CSA003954.1	proteasome subunit alpha type-1-B-like	1	1	19.065	5.6325	5.6	2	2	2											1.09			1.111			0.755			1.01927		0.692661		0.679568
CSA003961.1	serine/threonine-protein kinase BLUS1 isoform X1	3	1	61.869	3.2357	4.2	2	2	2	2.2941	3.4	2	2	2	3.7735	3.4	2	2	2			1.063			1.024			0.886	0.963311		0.83349		0.865234
CSA003968.1	probable leucine-rich repeat receptor-like protein kinase At1g35710	3	3	37.237	6.9715	12.5	3	4	3	8.344	6.4	2	3	2	7.8535	12.8	4	5	4	1.066	1.068	1.152	0.986	1.026	0.86	0.923	0.878	0.941	0.874011	0.0743165	0.834449	0.00593447	0.954735	0.462701
CSA003969.1		3	3	13.949	72.207	23	3	4	3	56.627	22.1	2	4	2	61.531	21.3	2	3	2	0.786	0.713	0.545	0.926	0.864	0.844	1.345	1.544	1.798	1.28865	0.0597401	2.29305	0.00412159	1.77942	0.00683782
CSA003970.1	protein GDAP2 homolog isoform X2	3	3	166.68	13.678	3.2	4	4	4	38.433	4.6	5	7	4	14.287	4.2	5	5	3	1.073	1	1.058	1.07	1.104	1.078	0.823	0.883	0.836	1.03865	0.175205	0.811881	0.00241009	0.781673	0.000347671
CSA003977.1	putative nuclease HARBI1 isoform X3	3	3	58.071	13.327	7.1	3	3	3	28.832	9.8	4	4	4	19.403	12.9	5	7	5	1.361	1.309	1.217	0.994	1.078	0.972	0.506	0.489	0.686	0.783123	0.00610485	0.432467	0.000631796	0.552234	0.00303368
CSA003979.1	zinc finger CCCH domain-containing protein 13-like	2	2	33.083	17.338	9.9	2	3	2						11.672	9.9	2	3	2	1.254		1.219	0.817		0.878	0.847		0.828	0.685402	0.00807256	0.677315	0.0024813	0.988201	0.783882
CSA003982.1	U1 small nuclear ribonucleoprotein 70 kDa	3	2	53.323	3.1167	6.1	3	3	3	2.2865	2.4	1	1	1	3.3904	3.9	2	2	2		1.218	1.532		0.891	0.732		0.817	0.553	0.590182	0.0852451	0.498182	0.0781512	0.844116	0.497963
CSA003983.1	probable mitochondrial-processing peptidase subunit beta, mitochondrial	3	3	67.837	323.31	41.3	20	45	11	323.31	40.2	20	47	12	298.93	43.3	18	37	10	0.991	1.048	1.033	0.949	0.963	0.983	1.039	1.017	1.008	0.942383	0.0401797	0.997396	0.897232	1.05838	0.013981
CSA003985.1	nipped-B-like protein isoform X1	1	0	113.41						1.2204	1.2	1	1	1
CSA003989.1	beta-mannosyltransferase-like protein	1	0	30.068	2.4708	3.4	1	1	1
CSA003990.1	aminoacylase-1 isoform X2	3	3	52.219	132.23	36.7	11	14	11	188.43	45.1	14	18	14	149.26	28.8	10	13	10	0.783	0.826	0.806	1.146	1.085	1.169	1.103	1.136	1.061	1.40787	0.00030135	1.36646	0.000295504	0.970588	0.37157
CSA003994.1	protein disulfide-isomerase-like	3	3	16.973	3.5377	21.9	3	5	1	5.2881	21.9	3	4	1	3.7447	21.9	3	3	1	1.262	1.01	1.143	1.007	1.111	0.997	0.63	0.866	0.806	0.912152	0.286594	0.674085	0.0217073	0.739005	0.0272136
CSA004007.1	mediator of RNA polymerase II transcription subunit 32	1	0	20.622											3.1747	12.2	1	1	1
CSA004013.1	AT-hook motif nuclear-localized protein 1-like	3	3	34.595	26.056	10	2	4	2	4.4991	7.3	2	3	2	27.277	10	2	2	2	1.576	1.629	1.239	0.772	0.794	0.771	0.448	0.352	0.917	0.525878	0.00456443	0.386364	0.0129812	0.734703	0.302346
CSA004015.1	brefeldin A-inhibited guanine nucleotide-exchange protein 2	3	3	199.99	62.71	9.4	15	19	10	58.491	13.5	21	24	10	106.54	12.2	17	21	10	1.001	1.111	1.047	1.016	1.006	1.017	1.004	0.79	0.957	0.962013	0.280575	0.870845	0.133296	0.905232	0.213912
CSA004018.1	DNA-directed RNA polymerase III subunit RPC3 isoform X1	3	2	59.224	6.1778	4.4	2	3	2	2.2538	4.2	2	2	2	2.4455	1.5	1	1	1	1.081	0.96		1.037	1.089		0.848	0.959		1.04165	0.584822	0.88535	0.290192	0.849953	0.121352
CSA004024.1	monodehydroascorbate reductase 5, mitochondrial	3	3	52.81	323.31	54.2	19	46	18	323.31	67.2	25	54	24	273.37	57.1	20	40	19	0.598	0.691	0.647	1.023	1.01	1.039	1.489	1.417	1.395	1.58678	0.000176404	2.22159	3.56479e-05	1.40007	0.000157973
CSA004027.1	vestitone reductase-like	3	3	36.713	61.634	30.1	6	8	6	56.411	21.7	5	7	5	78.964	44.9	10	11	10	0.843	0.77	0.87	1.155	1.144	1.166	0.949	1.092	1.001	1.39549	0.000429191	1.22513	0.0222075	0.877922	0.0289493
CSA004030.1	vacuolar-sorting receptor 6-like	3	2	70.395	1.6992	1.3	1	2	1	3.1308	3.3	2	4	2	1.4137	1.3	1	2	1	0.703	0.697		1.122	0.943		1.279	1.481		1.475	0.0654903	1.97143	0.021375	1.33656	0.123488
CSA004039.1	notchless protein homolog	1	1	32.137											1.8197	3.1	1	1	1			1.347			0.828			0.706	0.614699		0.524128		0.852657
CSA004042.1	notchless protein homolog	1	0	9.6919											3.1886	13.6	1	1	1
CSA004046.1	serine hydroxymethyltransferase 3, chloroplastic-like	3	3	57.343	4.6886	30	12	23	2	13.741	26.8	10	19	2	22.229	26.2	11	19	2	1.057	1.093	1.012	1.054	1.014	1.087	0.863	0.857	0.89	0.997786	0.944569	0.825427	0.00196597	0.827258	0.00148823
CSA004048.1	far upstream element-binding protein 1 isoform X2	3	3	70.963	98.452	19.7	12	25	9	157.18	19.7	12	28	9	99.32	19.7	12	26	9	1.061	1.082	1.067	1.036	1.028	1.023	0.887	0.881	0.896	0.961682	0.0049467	0.829907	1.81831e-05	0.862974	1.66799e-05
CSA004050.1	probable transcriptional regulator SLK2	3	3	91.769	20.439	5	4	4	4	15.656	4	3	4	3	4.905	2.1	2	4	2	1.069	1.01	1.002	0.999	0.986	1.058	0.905	1.001	0.934	0.987666	0.700261	0.921779	0.0859039	0.93329	0.133661
CSA004051.1	F-box protein At4g00755-like isoform X1	1	1	36.928	1.3907	3.7	1	1	1											1.437			0.619			0.806			0.430759		0.560891		1.3021
CSA004055.1		2	1	7.5845	1.6232	13.4	1	1	1	1.4117	13.4	1	1	1							1.008			1.067			0.917		1.05853		0.909722		0.859419
CSA004065.1	DEAD-box ATP-dependent RNA helicase 8	3	3	56.684	146.61	41.6	19	27	11	141.52	42.4	19	29	11	117.65	36.3	17	26	10	1.151	1.159	1.209	0.934	0.914	0.901	0.862	0.808	0.802	0.781188	0.000235426	0.702472	0.000187253	0.899236	0.0124143
CSA004075.1	protein CREG1 isoform X1	3	3	22.268	40.116	12.4	2	3	2	54.238	16.4	3	5	3	36.828	16.4	3	4	3	0.818	0.884	0.836	1.425	1.326	1.364	0.838	0.798	0.818	1.62136	0.000113491	0.966903	0.287335	0.596355	5.82042e-05
CSA004076.1	methyltransferase-like protein 13 isoform X1	1	1	12.011						2.2681	10.5	1	1	1							1.072			0.918			0.989		0.856343		0.922575		1.07734
CSA004082.1	UDP-glucuronic acid decarboxylase 1	3	2	48.653	48.793	29.7	10	17	4	36.389	24.1	10	17	2	31.878	21.1	9	19	1	1.375	1.262		0.939	0.868		0.546	0.78		0.685248	0.0248916	0.502844	0.0371145	0.733813	0.188069
CSA004088.1	probable beta-1,3-galactosyltransferase 20	3	1	78.495	2.7895	1.9	1	1	1	2.3646	1.9	1	1	1	2.4917	1.9	1	1	1			1.044			0.929			1.016	0.889847		0.97318		1.09365
CSA004089.1	auxin response factor 6 isoform X2	2	2	99.117	6.8597	3.2	2	2	2						9.081	3.2	2	2	1	1.197		1.198	0.998		1.076	0.729		0.644	0.865971	0.0542898	0.573278	0.00684727	0.662006	0.0260309
CSA004105.1	ADP-ribosylation factor 1 isoform X1	2	2	20.666	271.72	59.1	9	36	9	18.14	63	10	36	1						1.148	0.991		1.007	0.919		0.756	1.1		0.900421	0.358233	0.867695	0.532253	0.963655	0.861936
CSA004107.1	monodehydroascorbate reductase 4, peroxisomal	3	3	60.612	65.135	20.6	10	14	10	98.456	26	12	19	12	94.616	18.5	9	15	9	0.705	0.729	0.645	0.887	0.889	0.902	1.538	1.582	1.595	1.28812	0.00141912	2.26792	8.47901e-06	1.76064	2.8692e-06
CSA004120.1	putative exosome complex component rrp40	2	1	21.646	6.3957	16.3	2	2	2						4.3931	16.3	2	2	2	0.844			1.05			1.162			1.24408		1.37678		1.10667
CSA004122.1	glycine-rich RNA-binding protein RZ1C-like isoform X1	3	2	7.766	3.6653	31.3	2	2	2	5.4805	19.4	1	1	1	3.5953	19.4	1	1	1		1.102	1.112		1.187	1.128		0.657	0.707	1.04562	0.233506	0.616079	0.00357931	0.589201	0.00654833
CSA004123.1	glycine-rich RNA-binding family protein	2	2	25.269						1.6743	19.5	4	4	2	2.3168	11.9	3	3	1		1.29	1.291		0.969	0.942		0.632	0.661	0.740411	0.00162224	0.500969	0.000507166	0.676609	0.00408559
CSA004124.1	glycine-rich RNA-binding family protein	3	3	9.1916	2.5008	12	1	2	1	1.8134	21.7	2	3	1	2.2081	12	1	2	1	1.231	1.269	1.144	0.992	0.936	0.964	0.69	0.698	0.84	0.793633	0.00342441	0.611416	0.00151908	0.770401	0.0125293
CSA004127.1	abscisate beta-glucosyltransferase	3	3	53.256	8.1829	8.5	3	3	3	9.5072	11.2	4	5	4	15.066	10.8	4	6	4	0.897	0.789	0.77	1.007	1.012	1.02	1.135	1.282	1.223	1.23738	0.00809392	1.48208	0.00246989	1.19776	0.00950223
CSA004129.1	UDP-glycosyltransferase 73C2	3	3	56.199	181.05	31	13	23	13	245.01	36.7	14	24	14	212.2	31.7	12	23	12	0.875	0.881	0.854	1.029	1.022	1.043	1.05	1.079	1.092	1.18544	9.52685e-05	1.2341	0.000164594	1.04105	0.0379028
CSA004130.1	protein ENHANCED DISEASE RESISTANCE 2 isoform X2	3	2	69.349	1.7802	1.8	1	1	1	8.794	7.5	4	4	4	5.4785	4.2	2	2	2	1.141	1.05		1.083	1.075		0.715	0.849		0.984938	0.752509	0.713829	0.0607234	0.724745	0.0474651
CSA004135.1	bet1-like protein At4g14600	1	1	15.121						3.0238	12.8	1	1	1							1.098			0.961			0.907		0.875228		0.826047		0.943809
CSA004138.1	pyridoxine/pyridoxamine 5'-phosphate oxidase 1, chloroplastic	3	3	51.442	18.723	11.4	5	7	5	43.37	13.8	7	11	7	26.77	13.3	8	10	8	0.795	0.824	0.815	1.068	1.058	0.997	1.21	1.175	1.254	1.28307	0.000643601	1.49507	7.98436e-05	1.16523	0.00569348
CSA004143.1	probable methyltransferase PMT24	2	2	88.798						2.8729	4.8	4	4	1	3.221	4.8	4	4	1		1.171	1.25		1.046	1.108		0.714	0.537	0.889715	0.117127	0.516729	0.0263648	0.58078	0.040531
CSA004148.1	thioredoxin-like 2, chloroplastic	3	3	21.748	30.376	28.1	4	6	4	20.437	35.7	5	8	5	39.513	36.2	5	6	3	0.742	0.733	0.707	0.835	0.894	0.858	1.491	1.484	1.559	1.18561	0.00256895	2.07791	7.33723e-06	1.75261	2.50705e-05
CSA004150.1	zinc finger CCCH domain-containing protein 14-like	3	3	47.045	15.8	14.1	4	7	2	32.478	16.1	5	9	3	21.816	18.1	5	9	3	1.171	1.171	1.143	0.901	0.932	0.988	0.871	0.837	0.815	0.809469	0.00122617	0.72396	6.89062e-05	0.894364	0.0303106
CSA004151.1	prohibitin-1, mitochondrial	3	3	31.55	24.178	45.1	10	17	6	7.5683	27.1	7	11	4	7.0651	27.1	7	10	3	0.944	0.992	0.914	1.325	1.31	1.174	0.643	0.676	0.931	1.33649	0.00384316	0.789474	0.0999411	0.590706	0.00722925
CSA004155.1	phosphoribosylamine--glycine ligase-like	3	2	33.209	5.4254	13.9	4	8	1	4.6895	13.9	4	9	1	10.099	16.1	5	8	1		0.885	0.916		1.094	1.039		1.057	1.074	1.18434	0.0343123	1.18323	0.0112845	0.999062	0.975441
CSA004158.1	fumarate hydratase 1, mitochondrial	2	0	116	3.2822	8.4	6	12	0	3.5821	7.4	5	8	0
CSA004159.1	fumarate hydratase 1, mitochondrial-like, partial	3	3	36.022	94.024	42.7	11	21	10	113.86	40.2	10	21	9	117.15	42.4	10	18	9	1.079	1.115	1.083	0.981	1.007	0.981	0.944	0.869	0.881	0.906012	0.00200072	0.822093	0.00168798	0.907376	0.0209631
CSA004162.1	Fumarate hydratase 1 family protein	3	3	34.518	197.97	41.4	7	12	3	167.55	38	6	10	3	145.39	40.2	7	12	4	1.115	1.159	1.115	0.987	0.989	0.984	0.84	0.867	0.848	0.873414	0.000631639	0.75391	7.64686e-05	0.863176	7.7335e-05
CSA004163.1	60S ribosomal protein L19-1-like	3	3	24.525	1.5523	20	4	7	1	2.4147	24.3	5	7	2	2.8035	24.3	5	7	2	1.802	1.659	1.721	0.499	0.646	0.588	0.429	0.472	0.447	0.334427	4.23188e-05	0.260131	7.80185e-06	0.777842	0.0449238
CSA004164.1	protein EXORDIUM-like 2	3	2	44	11.057	7.6	2	2	2	16.771	18.6	4	5	4	5.7478	12.2	2	2	2	0.437	0.45		0.904	0.909		1.883	1.859		2.04397	0.000226169	4.21871	9.1387e-05	2.06398	0.000161475
CSA004167.1	syntaxin-43-like	2	1	38.379	3.831	7.8	2	2	1						7.4734	6.4	2	2	1	1.116			0.852			0.999			0.763441		0.895161		1.17254
CSA004174.1	LOW QUALITY PROTEIN: purple acid phosphatase 18-like	1	0	24.38						1.6833	3.7	1	1	1
CSA004177.1	protein FAR1-RELATED SEQUENCE 3	3	3	98.947	31.676	14	11	11	8	15.797	7.9	7	7	4	24.521	9.9	9	9	6	0.948	0.969	0.969	1.099	1.098	1.085	0.958	0.934	0.951	1.13721	9.25349e-05	0.9851	0.22463	0.86624	6.4729e-05
CSA004179.1	serrate RNA effector molecule	3	3	97.384	80.829	22.1	17	25	17	80.579	22.2	18	25	18	68.987	24.5	19	30	19	1.727	1.673	1.834	0.608	0.55	0.539	0.481	0.468	0.375	0.324226	2.2285e-05	0.252961	2.30623e-05	0.7802	0.0349933
CSA004180.1	NADP-dependent malic enzyme	3	3	59.949	98.634	18.2	9	18	3	153.05	25.7	12	19	5	80.868	33.1	14	19	8	1.372	1.34	1.391	0.987	0.976	0.975	0.5	0.544	0.532	0.716061	1.45698e-05	0.384109	1.84229e-06	0.536419	4.92059e-06
CSA004187.1	LL-diaminopimelate aminotransferase, chloroplastic-like	3	3	50.263	258.46	37.3	11	23	11	196.69	41	12	27	12	207.33	47.1	14	33	14	0.947	0.956	0.969	1.239	1.184	1.234	0.771	0.865	0.785	1.27333	0.000150822	0.842967	0.00740425	0.662018	0.000270449
CSA004189.1	cytochrome P450 81E8-like	1	0	19.698	2.2228	5.7	1	1	1
CSA004196.1	protein enabled	3	3	53.643	9.0843	9.3	4	4	4	3.7121	5.4	2	2	2	8.5938	7.2	3	3	3	0.997	0.994	0.933	1.121	1.007	1.076	0.962	1.001	1.011	1.09576	0.0757275	1.0171	0.551354	0.928215	0.102695
CSA004197.1	galactinol--sucrose galactosyltransferase	3	3	86.299	35.127	5.2	4	5	4	33.671	5.2	4	5	4	49.15	5.2	4	5	4	0.345	0.305	0.204	0.804	0.804	0.899	2.02	2.053	2.21	2.9356	0.000468136	7.35714	1.49431e-05	2.50618	4.6223e-05
CSA004205.1	pentatricopeptide repeat-containing protein At1g11290, chloroplastic	1	0	90.674											1.4003	1	1	1	1
CSA004206.1	protein ELC-like	3	3	46.205	33.392	18.4	7	8	7	38.31	22.3	8	10	8	26.939	22.3	8	10	8	1.034	1.011	1.075	0.984	1.029	0.969	0.938	0.959	0.988	0.955769	0.151421	0.924679	0.0296857	0.967471	0.234725
CSA004214.1	mediator of RNA polymerase II transcription subunit 11	1	0	13.084						2.9877	11.3	1	1	1
CSA004216.1	probable magnesium transporter NIPA4	3	2	38.53	1.937	4.5	1	1	1	9.7442	4.5	1	1	1	3.6268	4.5	1	1	1	1.033	1.065		0.938	0.977		1.021	0.935		0.912774	0.068301	0.932316	0.261817	1.02141	0.706506
CSA004220.1	la-related protein 1C-like	3	1	58.588	3.6092	2.9	1	1	1	15.421	5.8	2	2	2	10.874	5.8	2	2	2		1.139			0.877			0.941		0.769974		0.826163		1.07298
CSA004236.1	sister chromatid cohesion protein PDS5 homolog B	3	3	81.252	9.0001	6.7	5	5	5	7.3264	5.4	4	4	3	8.0118	5.2	4	4	3	1.23	1.176	1.288	1.042	1.087	0.973	0.674	0.662	0.631	0.83974	0.0130434	0.532485	7.80658e-05	0.634107	0.00044097
CSA004241.1	acetyl-CoA acetyltransferase, cytosolic 1	3	3	13.46	45.686	26.6	2	3	2	56.737	26.6	2	3	2	53.136	21.1	1	2	1	0.958	1.101	0.992	0.998	0.984	1.045	1.061	0.871	0.963	0.992134	0.872868	0.948869	0.497573	0.956392	0.489454
CSA004242.1	acetyl-CoA acetyltransferase, cytosolic 1 isoform X1	3	3	31.147	3.2379	8.4	2	3	2	5.1538	3.8	1	2	1	6.5782	8.4	2	4	2	1.082	1.047	1.071	0.967	0.953	0.93	0.876	0.986	0.978	0.890625	0.00145003	0.8875	0.0312783	0.996491	0.932574
CSA004254.1	putative low molecular weight protein-tyrosine-phosphatase slr0328	3	3	21.012	28.784	26.3	4	5	4	24.118	21.6	3	5	2	20.481	14.7	2	3	1	0.754	0.803	0.86	0.917	1.034	0.907	1.475	1.236	1.294	1.18246	0.0448872	1.65701	0.0024877	1.40133	0.00986575
CSA004256.1	neutral/alkaline invertase 3, chloroplastic	3	3	72.471	13.226	6.4	4	4	2	10.929	8.1	5	5	3	18.832	8.7	5	6	3	0.523	0.69	0.758	1.218	1.303	1.161	1.425	1.102	1.161	1.86809	0.00215396	1.87113	0.00920698	1.00163	0.986052
CSA004258.1	uncharacterized LOC8278573 precursor	2	2	20.151						6.2655	18.1	3	5	2	4.0631	18.1	3	5	2		1.129	1.434		0.952	0.836		0.873	0.577	0.69762	0.140789	0.565743	0.12011	0.810962	0.399094
CSA004259.1	uncharacterized LOC8278573 precursor	3	3	22.432	5.7809	17.2	3	3	2	6.616	20.6	4	4	3	9.3433	17.2	3	3	2	1.448	1.752	1.431	0.778	0.65	0.805	0.62	0.338	0.615	0.482185	0.00223031	0.339667	0.00188306	0.704433	0.103569
CSA004267.1	phytanoyl-CoA dioxygenase	3	3	17.926	11.095	20.1	2	2	2	10.057	20.1	2	2	2	9.4767	20.1	2	2	2	1.1	1.179	1.164	1.155	1.046	1.036	0.694	0.703	0.734	0.940168	0.202991	0.618937	8.60485e-05	0.658326	0.000769226
CSA004269.1	10 kDa chaperonin-like	3	3	10.364	48.689	51.5	5	11	3	32.313	61.9	6	10	4	63.303	61.9	6	13	4	1.204	1.164	1.158	0.921	0.947	0.943	0.795	0.819	0.778	0.797221	0.000135015	0.678389	3.53987e-05	0.850943	0.000629077
CSA004276.1	transcription termination factor MTEF1, chloroplastic	3	0	35.456	2.0185	2.2	1	1	1	1.8446	2.2	1	1	1	1.6879	2.2	1	1	1
CSA004277.1	CBL-interacting protein kinase 04 isoform X3	3	3	46.521	27.214	13.3	5	7	5	29.245	15.4	6	7	6	29.663	13.3	5	7	5	1.116	1.093	1.062	0.955	0.944	0.901	0.945	0.941	0.984	0.856007	0.0023009	0.877408	0.00301806	1.025	0.337586
CSA004278.1	CBL-interacting serine/threonine-protein kinase 23	2	1	8.2743	4.9505	14.5	1	1	1	1.3156	11.8	1	1	1						1.076			1.001			0.894			0.930297		0.830855		0.893107
CSA004279.1	calcium-dependent phosphotriesterase superfamily protein	3	3	35.619	153.15	51.1	12	19	12	174.74	50.8	12	20	12	149.02	46.7	11	20	11	0.998	1.004	1.011	0.988	0.96	0.976	1.018	1.047	1.019	0.970461	0.0294021	1.02356	0.0815147	1.05472	0.0129649
CSA004286.1	2-alkenal reductase (NADP(+)-dependent)	3	3	28.63	53.191	32.8	9	15	5	43.374	27.7	8	14	4	28.372	41.4	8	14	3	0.919	0.894	0.892	1.15	1.184	1.101	0.916	0.948	1.041	1.26987	0.000684626	1.07394	0.158238	0.845706	0.0166148
CSA004291.1	glyoxysomal processing protease, glyoxysomal isoform X2	1	1	30.106											1.7626	2.9	1	1	1			1.11			1.011			0.835	0.910811		0.752252		0.825915
CSA004293.1	protease-related family protein	2	2	22.512						1.2729	4.8	1	1	1	3.1961	4.8	1	1	1		0.751	0.777		1.034	1.032		1.308	1.274	1.35209	0.00234109	1.68979	0.00164502	1.24976	0.00432844
CSA004304.1	beta-hexosaminidase 2	2	1	67.354	2.2808	1.8	1	1	1	2.6874	1.8	1	1	1							0.975			1.085			0.942		1.11282		0.966154		0.868203
CSA004313.1	probable inactive receptor kinase At5g58300	3	2	71.305	1.9412	3.4	2	2	1	1.5441	5.5	3	3	2	3.6538	5.7	3	3	2		1.211	1.594		1.027	0.798		0.678	0.396	0.650624	0.159243	0.382888	0.0678971	0.588493	0.174641
CSA004317.1	probable plastid-lipid-associated protein 4, chloroplastic isoform X3	3	3	32.704	27.946	13.1	3	5	3	63.192	15.5	4	5	4	33.401	18.6	5	7	5	0.427	0.318	0.446	0.737	0.659	0.851	2.087	2.33	1.928	1.88665	0.00681315	5.32746	0.000154872	2.82377	0.000456964
CSA004318.1	patatin-like phospholipase domain-containing protein 2 isoform X1	3	2	47.889	34.084	8.8	2	3	2	1.6684	6	2	2	2	6.9685	6	2	2	2	0.964	0.856		1.149	1.046		0.889	1.15		1.20604	0.128545	1.12033	0.519268	0.928929	0.634125
CSA004322.1	Dihydrolipoyllysine-residue acetyltransferase component of pyruvate dehydrogenase complex	3	3	45.228	93.186	38.7	11	18	9	76.649	34.1	10	17	8	65.216	32.5	9	21	8	0.978	1.013	1.075	1.128	1.142	1.074	0.881	0.858	0.889	1.09067	0.0577114	0.857143	0.00808982	0.785885	0.000464176
CSA004323.1	nicotinate-nucleotide pyrophosphorylase	3	3	38.701	5.0216	9.9	3	4	3	25.738	11.8	4	4	4	31.494	21.1	5	5	5	0.917	0.935	0.92	1.077	1.056	1.106	1.031	1.029	1.005	1.16847	0.000556583	1.1057	0.000625042	0.94628	0.0256571
CSA004326.1	AP-1 complex subunit mu-2	3	3	25.196	4.1299	13.1	3	4	1	4.6511	13.1	3	4	1	4.3927	21.2	4	5	2	1.108	0.961	1.011	1.045	0.953	1.021	0.802	1.105	0.963	0.980195	0.711535	0.931818	0.512835	0.950646	0.61706
CSA004328.1	histone H4-like	3	3	11.502	-2	11.8	1	1	1	-2	18.6	2	3	1	-2	18.6	2	2	1	0.564	0.572	0.604	0.745	0.747	0.796	1.879	1.865	1.768	1.31494	0.000905868	3.16782	4.46343e-06	2.40909	9.98405e-06
CSA004331.1	Ribonuclease P protein subunit p30	3	3	52.612	3.8432	2.9	1	1	1	3.7967	2.9	1	1	1	2.8022	2.9	1	1	1	0.999	0.974	0.976	1.089	1.105	1.081	0.905	0.922	0.947	1.11055	0.000525955	0.940658	0.0161853	0.847023	0.00029021
CSA004343.1	protein PPLZ12	3	3	32.48	32.787	21	7	10	7	27.076	21	6	10	6	16.341	16.8	5	10	5	0.899	0.929	0.88	1.108	1.112	1.135	0.957	0.994	0.976	1.23892	0.000200606	1.08087	0.0148956	0.872429	0.000466477
CSA004351.1	RNA-binding protein BRN1-like isoform X1	2	2	26.888						11.932	7.5	1	1	1	11.295	7.5	1	1	1		1.1	1.143		1.031	1.056		0.828	0.742	0.93045	0.0883893	0.699955	0.0198072	0.752276	0.0287221
CSA004355.1	V-type proton ATPase subunit E-like	3	3	31.581	17.507	4.2	2	4	2	7.0281	4.2	2	3	2	16.202	4.2	2	4	2	1.101	1.054	1.01	1.038	1.076	0.986	0.822	0.843	0.957	0.979463	0.589832	0.828436	0.0216327	0.845806	0.0320978
CSA004362.1	ubiquitin-conjugating enzyme E2-17 kDa	2	0	16.504						-2	31.1	3	7	1	-2	43.2	4	9	1
CSA004367.1	WD and tetratricopeptide repeats protein 1 isoform X3	2	0	81.635	8.784	4.2	3	3	3	3.3303	2.8	2	2	2
CSA004369.1	formin-like protein 3 isoform X1	3	3	58.777	22.926	11.7	5	6	5	29.504	18.3	8	8	8	21.833	15.4	7	7	7	1.083	1.172	1.118	0.934	0.92	0.943	0.887	0.848	0.899	0.829232	0.00199188	0.780907	0.001217	0.941723	0.0317707
CSA004378.1	protein REDUCED WALL ACETYLATION 2	3	2	62.451	2.7525	1.9	1	2	1	4.2834	4.1	2	2	2	3.4085	1.9	1	2	1	1.256		1.292	1.03		1.011	0.613		0.584	0.80102	0.00638457	0.46978	0.00116878	0.586477	0.00168315
CSA004381.1	TATA-binding protein-associated factor BTAF1 isoform X2	3	2	245.26	6.0717	1.4	3	3	3	4.2829	1.4	3	3	3	3.8149	0.9	2	2	2	1.023		1.033	1.044		1.066	0.92		0.884	1.02626	0.155011	0.877432	0.0212836	0.854976	0.0184843
CSA004383.1	ubiquitin carboxyl-terminal hydrolase 26	1	1	68.016						1.9191	3.1	2	2	2							1.069			0.978			0.928		0.914874		0.868101		0.948875
CSA004384.1	ubiquitin carboxyl-terminal hydrolase 26-like isoform X2	3	2	52.109	17.159	3.3	1	1	1	15.184	3.3	1	1	1	5.3087	3.3	1	1	1	0.966	0.932		1.127	1.143		0.911	0.939		1.196	0.0100499	0.97471	0.389611	0.814978	0.00584406
CSA004391.1	electron carrier/iron ion-binding protein, putative	2	2	31.827						1.5142	5.4	1	1	1	2.9391	5.4	1	1	1		1.129	1.072		0.996	1.01		0.826	0.89	0.911404	0.0798918	0.779646	0.0298351	0.855434	0.0474328
CSA004393.1	plant/F14D7-9 protein	3	3	36.813	146.71	36	11	17	6	123.39	33.1	8	13	5	146.86	35.8	10	16	6	1.374	1.568	1.412	0.797	0.791	0.816	0.707	0.532	0.649	0.552136	0.000407469	0.433624	0.000471526	0.785358	0.029745
CSA004394.1	zinc finger CCCH domain-containing protein 67 isoform X1	1	0	48.209						1.803	2.6	1	2	1
CSA004395.1	succinate dehydrogenase	3	3	31.47	18.714	29.4	7	14	3	6.2969	25.8	7	13	3	8.8431	23.3	7	11	3	1.011	1.023	1.005	0.937	0.946	0.925	1.033	1.026	1.074	0.923988	0.000671309	1.03093	0.119705	1.11574	0.00257593
CSA004398.1	ATP synthase mitochondrial F1 complex assembly factor 2	3	2	36.653	9.9719	10.3	3	3	3	14.323	13.9	4	4	4	11.393	11.8	3	3	3	0.975		1.239	0.949		0.886	1.09		0.792	0.828817	0.29739	0.850045	0.492063	1.02561	0.891532
CSA004400.1	probable carboxylesterase 11	1	0	49.512						4.0046	3.6	1	1	1
CSA004401.1	transmembrane protein 53	3	2	45.404	6.8608	3.6	1	1	1	13.298	7.1	2	3	2	13.053	7.1	2	3	2	0.891	1		0.996	0.913		1.155	1.093		1.00952	0.907496	1.18879	0.104413	1.17758	0.0820623
CSA004403.1	dehydrin isoform X1	3	2	29.01	1.9149	4.3	1	2	1	3.6747	7.5	2	2	2	3.4075	7.5	2	3	2	1.023		1.256	1.059		1.067	0.904		0.573	0.932865	0.579065	0.648091	0.186072	0.694732	0.189036
CSA004405.1	ABC transporter B family member 20	2	1	98.254	1.419	5.1	3	3	1						3.4434	1.9	2	2	2			1.11			1.026			0.82	0.924324		0.738739		0.79922
CSA004410.1	ribosomal large subunit pseudouridine synthase B	1	1	10.086											2.1833	11.5	1	1	1			0.906			1.214			0.898	1.33996		0.99117		0.739703
CSA004411.1	uncharacterized RNA pseudouridine synthase aq_1464-like isoform X1	3	3	38.369	3.8348	3.2	1	1	1	3.5364	3.2	1	1	1	10.632	5.7	2	3	2	0.879	0.982	0.958	1.663	1.555	1.568	0.453	0.426	0.357	1.69777	0.000142141	0.438453	0.000236431	0.258253	1.18338e-05
CSA004413.1	O-acyltransferase WSD1-like	3	3	47.195	45.955	18.9	7	9	7	40.509	25.8	8	13	8	83.874	25.8	8	12	8	0.969	0.983	0.972	1.693	1.596	1.633	0.338	0.357	0.313	1.68331	2.01033e-05	0.344733	1.17074e-06	0.204795	1.90576e-06
CSA004415.1	3-deoxy-manno-octulosonate cytidylyltransferase, mitochondrial	1	0	15.523						1.5331	11.8	1	1	1
CSA004417.1	probable 2-carboxy-D-arabinitol-1-phosphatase	3	3	29.073	115.07	45.5	9	13	9	63.05	38.8	8	9	8	75.298	42	9	12	9	0.536	0.543	0.526	0.834	0.872	0.825	1.836	1.731	1.788	1.57695	3.49402e-05	3.33645	2.18742e-06	2.11576	9.6485e-06
CSA004420.1	deoxyuridine 5'-triphosphate nucleotidohydrolase	3	3	23.414	55.528	9.9	1	2	1	35.731	9.9	1	2	1	40.799	9.9	1	2	1	0.908	0.909	0.786	0.921	1.018	0.991	1.212	1.107	1.305	1.12562	0.0948779	1.39224	0.00838217	1.23686	0.0225569
CSA004422.1	receptor-interacting protein, putative	2	2	10.123						12.221	40.2	2	2	2	8.9302	40.2	2	2	2		0.73	0.672		1.164	1.292		1.196	1.139	1.75178	0.0173159	1.66548	0.00751139	0.950733	0.47885
CSA004426.1	adenosylhomocysteinase	3	3	66.882	21.615	29.3	17	50	4	15.123	29.3	17	54	4	52.234	27.8	16	41	4	1.482	1.435	1.527	0.858	0.863	0.826	0.451	0.559	0.434	0.573132	2.60999e-05	0.324932	2.9597e-05	0.566941	0.000841474
CSA004427.1	60S ribosomal protein L9	3	3	21.966	214.54	68.6	15	39	7	39.719	67.5	14	38	7	38.866	67	13	38	6	1.388	1.469	1.431	0.969	0.958	0.973	0.501	0.398	0.43	0.676306	4.14436e-05	0.309935	1.36316e-05	0.458276	6.98545e-05
CSA004430.1	universal stress family protein	3	3	23.14	9.9904	21.3	4	5	4	14.779	28.9	5	7	5	19.816	36.5	6	8	6	0.832	0.838	0.822	0.898	0.878	1.031	1.344	1.333	1.258	1.1264	0.0951097	1.57905	6.20193e-05	1.40185	0.00241064
CSA004431.1	peroxidase 64-like	2	0	34.142						4.304	6.6	1	1	1	2.0277	2.8	1	1	1
CSA004437.1	cysteine proteinase 15A-like	3	3	23.258	8.5791	12	2	3	2	27.981	17.2	3	4	3	13.838	16.7	3	6	2	0.684	0.518	0.6	0.943	0.98	0.91	1.376	1.599	1.588	1.57214	0.00271919	2.53219	0.000451143	1.61066	0.00156508
CSA004438.1	cysteine protease RD19A-like	2	1	19.948	8.9595	8.2	1	1	1	14.786	8.2	1	1	1							0.43			1.024			1.762		2.3814		4.09767		1.7207
CSA004439.1	V-type proton ATPase subunit a3-like	3	2	93.403	1.9331	3.5	3	4	1	3.1065	3.5	3	4	1	3.0144	2.4	2	2	1		1.065	0.925		0.971	1.031		0.942	1.07	1.00603	0.944378	1.01106	0.918267	1.005	0.950042
CSA004448.1	serine/threonine-protein phosphatase 6 regulatory subunit 3-like isoform X1	3	2	26.292	3.027	4.5	1	1	1	6.1423	4.5	1	1	1	2.3826	4.5	1	1	1	1.151	1.134		0.982	1.019		0.811	0.795		0.875711	0.0199435	0.702845	0.00118002	0.802599	0.0102551
CSA004449.1	protein TIC 20-I, chloroplastic	1	0	30.61											2.6962	5.2	2	2	2
CSA004452.1	ultraviolet-B receptor UVR8	2	1	50.81						6.5818	2.9	1	1	1	3.8479	2.9	1	1	1			0.822			1.051			1.191	1.27859		1.44891		1.13321
CSA004462.1	WD repeat-containing protein 48	3	2	58.751	11.171	8.8	4	5	4	16.903	10.3	5	5	5	11.726	11.6	5	5	5	0.965		0.918	1.023		1.026	1.024		1.085	1.08816	0.0719158	1.12002	0.0991368	1.02928	0.429476
CSA004468.1	plant UBX domain-containing protein 10	3	3	50.352	57.139	23.8	8	13	4	46.233	16.6	6	9	2	71.358	22.9	9	12	4	1.068	0.989	1.119	1.031	1.009	1.022	0.866	1.006	0.773	0.964106	0.377861	0.832809	0.0845901	0.863815	0.110487
CSA004471.1	cytochrome P450 family 72 protein	2	2	26.536	8.3566	12.1	2	3	2						9.5827	12.1	2	3	2	0.863		0.847	1.066		1.033	1.055		1.176	1.22749	0.00877161	1.30468	0.0507404	1.06289	0.402978
CSA004475.1	F-box protein SKIP16 isoform X2	1	0	13.198	1.3535	5.8	1	1	1
CSA004486.1	calcium-dependent protein kinase 8-like	2	0	54.978	13.875	7.3	3	3	3						4.6336	3.3	1	1	1
CSA004488.1	stem-specific protein TSJT1	3	3	49.949	48.267	14.5	5	9	5	101.55	17.9	6	12	6	83.385	17.9	6	13	6	0.855	0.907	0.921	1.119	1.123	1.094	1.034	1.018	0.995	1.24338	0.000589067	1.13567	0.00623617	0.913369	0.00266906
CSA004489.1	nuclear transcription factor Y subunit C-9-like	3	1	27.116	7.0937	22.8	5	6	1	5.8128	28.2	7	9	1	7.7058	28.2	7	10	1	0.849			0.969			1.243			1.14134		1.46408		1.28277
CSA004492.1	ATP-dependent (S)-NAD(P)H-hydrate dehydratase isoform X1	3	3	29.557	6.5795	12.2	3	3	3	16.572	24.7	6	6	6	7.5423	12.2	3	3	3	0.897	0.862	0.746	0.985	1.017	0.934	1.158	1.173	1.423	1.17206	0.0497061	1.4986	0.0128619	1.27861	0.0378726
CSA004495.1	NEDD8-activating enzyme E1 catalytic subunit	3	3	59.954	75.011	31.4	15	20	15	67.726	23.1	11	16	11	69.672	20.5	9	14	9	0.982	0.977	0.938	1.015	1.053	1.022	1.009	0.977	1.072	1.06662	0.0239568	1.05557	0.160332	0.989644	0.742178
CSA004501.1	guanine nucleotide-binding protein subunit beta-like protein	3	3	36.103	156.31	51.8	14	36	8	108.43	55.5	14	34	8	107.2	57.6	15	36	9	1.286	1.179	1.197	0.933	0.939	0.942	0.646	0.812	0.765	0.768433	0.00104192	0.607045	0.00128179	0.789979	0.0163715
CSA004504.1	beta-glucosidase 44-like	3	3	59.642	69.931	27.6	12	17	11	43.14	16.6	7	9	7	52.045	22	10	14	9	0.986	1.002	1.017	1.238	1.334	1.294	0.744	0.67	0.718	1.28652	0.00060437	0.709484	0.000242414	0.551474	8.12809e-05
CSA004507.1	protein SCO1 homolog 2, mitochondrial isoform X2	3	1	24.177	3.0969	4.2	1	2	1	4.9619	14.8	3	4	3	8.2919	11.6	2	4	2			0.8			1.112			1.155	1.39		1.44375		1.03867
CSA004514.1	DNA damage-binding protein 2	1	1	81.82											-2	1.1	1	1	1			0.87			1.215			0.948	1.39655		1.08966		0.780247
CSA004520.1	serine carboxypeptidase-like 18 isoform X3	1	0	51.351											1.9417	2.6	1	1	1
CSA004531.1	carboxymethylenebutenolidase homolog	3	3	30.787	173.98	39.4	8	17	8	256.59	42.6	9	18	9	215.02	42.6	9	18	9	0.601	0.581	0.579	1.089	1.098	1.094	1.423	1.472	1.424	1.86315	2.86238e-07	2.45258	1.09319e-06	1.31637	2.96741e-05
CSA004532.1	chlorophyll a-b binding protein CP26, chloroplastic	3	3	34.438	204.44	49.2	12	59	12	253.24	49.2	12	57	12	312.56	49.2	12	56	12	0.469	0.439	0.46	0.668	0.661	0.698	1.977	2.166	2.045	1.48173	0.000108125	4.52339	8.77158e-06	3.05279	1.62515e-05
CSA004533.1	single-stranded DNA-bindig protein WHY2, mitochondrial isoform X2	3	3	35.37	48.793	29.3	7	9	7	63.374	29.7	7	12	7	80.952	25.2	6	10	6	1.247	1.239	1.252	0.939	0.948	0.944	0.731	0.757	0.761	0.757357	3.19566e-07	0.601659	1.04148e-06	0.794419	3.77686e-05
CSA004534.1	MICOS complex subunit Mic10	2	2	11.007	2.8293	11.8	1	1	1						3.4829	18.6	2	2	2	0.917		0.886	0.852		0.982	1.274		1.178	1.01719	0.838144	1.35996	0.02332	1.33697	0.0620805
CSA004535.1	RmlC-like cupins superfamily protein	3	3	33.117	68.041	31	5	10	5	109.9	26.3	4	8	4	117.22	26.3	4	9	4	0.545	0.591	0.63	0.845	0.83	0.859	1.84	1.749	1.665	1.43488	0.000592587	2.97508	3.22194e-05	2.0734	5.98352e-05
CSA004536.1	CLP protease regulatory subunit CLPX1, mitochondrial-like	2	2	74.032						2.6459	3.6	2	3	1	3.3828	4.7	3	3	2		1.073	1.154		1.016	0.798		0.882	1.004	0.814549	0.21774	0.846879	0.145283	1.03969	0.800308
CSA004537.1	probable small nuclear ribonucleoprotein G	3	2	8.9243	2.0577	40	3	5	1	84.247	67.5	5	6	2	25.99	67.5	5	6	2		1.088	1.086		0.96	0.944		0.923	0.942	0.875805	0.00354756	0.857866	0.00380097	0.979517	0.256974
CSA004541.1	polyadenylation and cleavage factor homolog 4 isoform X1	3	3	121.63	10.542	4.1	3	3	3	5.8822	1.4	2	2	2	10.669	3.1	2	2	2	1.184	1.111	1.244	0.909	0.939	0.893	0.844	0.912	0.778	0.774513	0.00284488	0.716021	0.00356371	0.92448	0.167405
CSA004554.1	WD-40 repeat-containing protein MSI1	2	1	34.513						3.2382	16.9	4	6	2	3.5508	18.9	4	4	1		1.145			0.898			0.91		0.784279		0.79476		1.01336
CSA004570.1	putative nuclease HARBI1	3	3	49.356	4.5489	4.7	2	3	2	4.1274	8.1	3	4	3	5.8462	4.7	2	3	2	0.937	1.066	1.098	0.995	1.005	0.981	1.093	0.904	0.892	0.961303	0.466016	0.931635	0.435333	0.969138	0.663847
CSA004577.1	uncharacterized hydrolase YugF-like	1	0	36.067	4.9433	6.9	1	1	1
CSA004598.1	trafficking protein particle complex subunit 12-like	3	3	42.879	21.7	15.7	6	8	6	26.698	15	6	7	6	22.204	12.1	5	7	5	0.96	1.081	1.061	0.986	1.012	0.975	1.066	0.937	0.952	0.958414	0.332325	0.952611	0.425859	0.993946	0.893767
CSA004599.1	bifunctional aspartate aminotransferase and glutamate/aspartate-prephenate aminotransferase isoform X2	3	3	53.338	222.72	27.6	10	18	10	167.3	26.6	9	16	9	166.64	31.1	11	17	11	1.085	1.088	1.066	1.063	1.063	1.079	0.764	0.745	0.776	0.989503	0.263149	0.705465	9.66479e-06	0.712949	8.12862e-06
CSA004604.1	lipid phosphate phosphatase 2-like	3	2	24.366	2.7717	3.8	1	2	1	2.6438	3.8	1	1	1	5.9621	12.7	3	3	3	1.174		1.148	0.725		1.007	1.055		0.787	0.745909	0.172617	0.793282	0.216581	1.06351	0.803945
CSA004606.1	monogalactosyldiacylglycerol synthase, chloroplastic	3	2	58.291	25.989	11.7	3	3	3	23.029	14	4	5	4	7.1031	11.7	3	3	3	0.761	0.814		1.03	1.075		1.299	1.176		1.33651	0.0167771	1.57143	0.0214362	1.17577	0.10579
CSA004610.1	probable steroid-binding protein 3	3	3	10.988	15.387	33	3	5	3	4.4497	18	2	4	2	13.566	36	3	7	3	1.412	1.388	1.344	0.837	0.848	0.816	0.605	0.628	0.725	0.603523	1.54921e-05	0.47249	6.36677e-05	0.782887	0.00884396
CSA004611.1	protein RRC1 isoform X1	3	3	109.2	5.4165	3.6	3	3	3	11.482	5.7	4	4	4	6.2307	4	3	4	3	1.011	1.156	1.191	1.017	1.04	1.092	0.966	0.741	0.636	0.937761	0.305929	0.697737	0.038979	0.744046	0.054596
CSA004618.1	ferredoxin-3, chloroplastic	3	3	16.377	99.277	56.2	3	4	3	69.661	33.3	2	3	2	50.814	33.3	2	3	2	1.213	1.217	1.171	1.087	1.096	1.026	0.595	0.596	0.736	0.891141	0.00782165	0.535129	0.000341606	0.600499	0.00117234
CSA004619.1	60S ribosomal protein L10a	3	3	26.995	143.38	46.6	11	21	4	166.26	38.1	8	20	3	42.51	45.8	9	22	3	1.275	1.305	1.22	0.993	0.943	0.967	0.631	0.652	0.686	0.763947	0.000484243	0.518158	3.26837e-05	0.678264	0.000133906
CSA004627.1	LIMR family protein At5g01460	3	3	33.252	7.375	7.1	2	3	2	8.4975	7.1	2	3	2	7.5102	7.1	2	2	2	1.15	1.118	1.211	1.046	1.021	1.005	0.742	0.813	0.703	0.883012	0.010365	0.649037	0.000646463	0.735026	0.00138754
CSA004631.1	probable protein phosphatase 2C 55 isoform X2	2	2	134.94						7.9604	2.1	2	2	1	9.3753	2.1	2	2	1		1.078	0.985		0.911	1.002		0.988	1.019	0.92729	0.368162	0.972855	0.625466	1.04914	0.431294
CSA004632.1	ycf3-interacting protein 1, chloroplastic isoform X1	3	3	31.741	88.646	16.5	4	6	4	108.97	16.5	5	8	5	85.103	16.8	4	8	4	0.59	0.582	0.59	1.095	1.088	1.046	1.479	1.534	1.532	1.83258	6.06506e-06	2.57946	8.8775e-07	1.40756	4.95697e-05
CSA004640.1	multiple inositol polyphosphate phosphatase 1 isoform X1	3	3	49.94	71.036	24.8	10	14	10	67.481	17.3	7	11	7	91.313	39	13	16	13	1.21	1.204	1.145	0.979	1.018	0.992	0.685	0.763	0.782	0.839843	0.00131273	0.626581	0.000256196	0.746069	0.00135447
CSA004644.1	homeobox protein prospero	2	0	145.71	1.9601	0.8	1	1	1						1.4942	1	1	1	1
CSA004654.1	glutathione S-transferase T1	3	3	17.959	11.768	43.7	6	18	2	40.584	55.1	8	21	4	17.598	54.4	7	22	3	0.889	0.816	0.911	0.643	0.71	0.659	1.576	1.54	1.467	0.769113	0.00457877	1.75191	0.000108277	2.27783	2.2648e-05
CSA004660.1	exocyst complex component SEC3A-like	3	0	12.052	3.1237	14	1	1	1	2.1105	14	1	1	1	4.4011	14	1	1	1
CSA004669.1	30S ribosomal protein S9, chloroplastic-like	3	3	13.021	7.1932	14.8	1	1	1	7.805	14.8	1	1	1	6.3786	14.8	1	2	1	0.752	0.758	0.758	1.676	1.618	1.651	0.614	0.668	0.632	2.18034	7.7281e-07	0.843915	0.00180161	0.387058	1.63698e-06
CSA004671.1		1	1	21.318						-2	4.9	1	1	1							1.667			0.577			0.534		0.346131		0.320336		0.925477
CSA004672.1	30S ribosomal protein S9, chloroplastic	3	3	12.874	13.837	19.8	2	5	2	13.082	19.8	2	6	2	10.675	19.8	2	5	2	0.865	1.016	0.931	1.209	1.144	1.232	0.811	0.795	0.846	1.27489	0.00723644	0.871977	0.060307	0.683961	0.000239812
CSA004679.1	glucan endo-1,3-beta-glucosidase 5-like	1	0	57.603						1.6083	4.9	2	2	1
CSA004685.1	probable inactive receptor kinase At1g27190	3	1	63.269	3.4402	5	2	2	2	1.5977	4.8	2	2	2	2.9675	4.8	2	2	2			1.063			0.944			0.973	0.888053		0.915334		1.03072
CSA004686.1	serine/threonine-protein phosphatase PP2A catalytic subunit	3	2	35.044	3.8286	40.5	8	13	1	84.695	35.3	7	12	6	48.707	27.1	6	10	5		1.174	1.159		0.968	0.972		0.853	0.834	0.831547	0.00155674	0.723103	0.00140126	0.869588	0.00583827
CSA004701.1		1	0	16.861	2.0248	7.1	1	1	1
CSA004702.1	chromatin modification-related protein eaf-1-like isoform X3	3	3	50.469	49.127	28.2	10	12	10	29.926	23.2	9	12	9	52.888	25.8	10	15	10	1.195	1.153	1.189	0.902	0.922	0.906	0.791	0.832	0.768	0.771841	4.92594e-05	0.675997	7.50758e-05	0.875824	0.00456662
CSA004704.1	probable aldo-keto reductase 2	1	0	22.589	4.5324	60.6	10	17	1
CSA004708.1	bifunctional epoxide hydrolase 2	3	2	22.667	2.0709	5.2	1	1	1	16.638	11.4	1	1	1	17.143	11.4	1	1	1		1.443	1.434		0.723	0.73		0.686	0.691	0.50504	6.41035e-05	0.478624	4.71078e-05	0.947694	0.0125706
CSA004714.1	protein-ribulosamine 3-kinase, chloroplastic	3	3	53.091	9.4458	6.1	3	4	3	4.8678	3.8	2	3	2	8.2412	6.1	3	3	3	0.707	0.696	0.654	1.094	1.134	1.16	1.248	1.276	1.306	1.64706	6.00251e-05	1.86193	1.42587e-05	1.13046	0.00443957
CSA004720.1	V-type proton ATPase subunit B 2	3	3	14.561	20.054	38.5	3	3	1	20.144	38.5	3	3	1	52.591	31.1	2	2	1	0.899	0.937	0.946	0.966	0.929	0.974	1.176	1.164	1.103	1.03127	0.220453	1.2376	0.00119312	1.20007	0.00195488
CSA004726.1	probable indole-3-acetic acid-amido synthetase GH3.6	3	3	65.332	6.3696	4	2	3	2	6.9054	4.5	2	2	2	4.6443	3.6	2	2	2	1.137	0.957	0.995	0.907	0.985	0.99	0.911	1.077	1.017	0.932988	0.321304	0.972807	0.721471	1.04268	0.500868
CSA004735.1	PI-PLC X domain-containing protein At5g67130	3	3	33.442	35.219	22.3	4	5	4	16.204	16.6	4	5	4	35.474	14.3	3	3	3	0.942	0.573	0.591	0.937	1.034	0.93	1.114	1.554	1.642	1.37749	0.100787	2.04653	0.0222818	1.48569	0.0479806
CSA004737.1	cationic amino acid transporter 1-like isoform X2	3	1	57.55	4.4722	1.9	1	1	1	2.795	1.9	1	1	1	3.5432	1.9	1	1	1	0.614			1.146			1.377			1.86645		2.24267		1.20157
CSA004740.1	protein GLE1 isoform X3	3	0	42.764	3.8732	5.1	1	1	1	4.9959	5.1	1	1	1	1.5219	9.4	2	2	2
CSA004746.1		2	2	7.8231	-2	9.6	1	1	1						-2	9.6	1	2	1	0.431		0.4	0.608		0.636	2.21		2.222	1.49699	0.0100761	5.33333	8.52041e-05	3.5627	9.1296e-05
CSA004750.1	ATP-dependent RNA helicase DBP2-like	1	0	12.807											1.6786	17.6	2	3	1
CSA004762.1	protein STRICTOSIDINE SYNTHASE-LIKE 2	2	2	47.818	3.0901	3.3	1	1	1	9.6246	3.3	1	1	1						0.568	0.639		1.196	1.168		1.387	1.318		1.95857	0.0043232	2.24109	0.00433967	1.14425	0.0445255
CSA004763.1	ribulose bisphosphate carboxylase small chain, chloroplastic-like	3	3	19.754	97.496	55.7	13	142	9	109.06	55.1	13	131	9	108.24	55.1	13	130	9	0.36	0.469	0.424	0.857	0.859	0.855	1.861	1.917	1.962	2.05188	0.000156082	4.58101	4.09664e-06	2.23259	3.50299e-06
CSA004765.1	protein DETOXIFICATION 46, chloroplastic	3	3	61.863	6.7684	3.7	2	3	2	12.351	3.7	2	3	2	4.8347	3.7	2	2	2	1.445	1.449	1.419	0.991	0.997	1.057	0.395	0.382	0.359	0.706005	5.2255e-05	0.26339	1.89116e-07	0.373071	1.11608e-05
CSA004768.1	GTP-binding protein BRASSINAZOLE INSENSITIVE PALE GREEN 2, chloroplastic	1	0	65.465											1.8607	1.4	1	1	1
CSA004771.1	NADH dehydrogenase	1	1	53.306											10.293	8.1	3	3	3			1.198			0.968			0.76	0.808013		0.634391		0.785124
CSA004774.1	ATPase 11, plasma membrane-type	3	3	107.11	70.36	40	32	53	11	93.55	35.1	28	45	8	70.044	35.5	29	51	7	1.049	1.076	0.987	1.03	1.072	1.04	0.9	0.809	0.958	1.00964	0.749507	0.857005	0.0430943	0.848822	0.0247862
CSA004783.1	LAG1 longevity assurance homolog 3	3	1	30.261	8.2061	5	2	2	2	11.802	5	2	2	2	6.149	5	2	2	2	1.101			1.018			0.84			0.924614		0.762943		0.825147
CSA004787.1	glutamate decarboxylase-like	1	1	9.6039	5.4395	20.2	1	2	1											0.815			1.366			0.86			1.67607		1.05521		0.629575
CSA004796.1	plant/F25P12-18 protein	3	3	18.494	173.71	47	8	19	8	101	41.7	6	23	6	245.84	42.3	7	23	7	0.866	0.86	0.901	1.51	1.546	1.488	0.602	0.551	0.494	1.72973	7.20928e-06	0.626951	0.000634756	0.362456	1.08353e-05
CSA004800.1		3	2	9.2525	2.726	13.4	1	1	1	2.6598	13.4	1	1	1	4.1531	13.4	1	1	1	1.052	1.124		1.007	0.993		0.92	0.835		0.919118	0.138496	0.806526	0.0634241	0.8775	0.104592
CSA004802.1	gamma-soluble NSF attachment protein	3	3	26.252	7.8773	9.4	2	3	2	12.858	10.7	2	3	2	11.67	15	3	4	3	1.057	1.036	1.098	1.061	1.011	0.992	0.838	0.938	0.873	0.960201	0.198219	0.830147	0.00634998	0.864556	0.0180878
CSA004804.1	probable inactive purple acid phosphatase 2	3	3	44.003	9.4862	11	4	6	4	13.818	11	4	5	4	10.662	11	4	5	4	0.724	0.719	0.717	1.483	1.519	1.247	0.861	0.878	1.125	1.96713	0.00122735	1.32593	0.0513744	0.674041	0.0186687
CSA004805.1	mediator of RNA polymerase II transcription subunit 37a-like	3	3	60.476	53.259	26.6	12	31	6	114.55	32.1	14	33	8	148	33.2	15	30	9	1.316	1.589	1.531	0.749	0.577	0.618	0.785	0.643	0.677	0.438233	0.00105806	0.474527	0.00114169	1.08282	0.469564
CSA004809.1	root phototropism protein 3	3	3	76.402	8.9155	6.6	4	4	4	14.998	11.8	7	9	7	13.671	8.6	5	5	5	0.843	0.859	0.902	1.308	1.458	1.402	0.777	0.701	0.703	1.60061	0.000381224	0.837558	0.00995902	0.523273	0.000193678
CSA004810.1	peptidyl-prolyl cis-trans isomerase FKBP16-3, chloroplastic	3	3	13.256	8.1807	20.8	3	6	3	8.2355	20.8	3	6	3	7.9113	20.8	3	5	3	0.493	0.449	0.643	0.971	0.969	0.984	1.733	1.796	1.501	1.84479	0.00162736	3.1735	0.000430516	1.72025	0.00144649
CSA004812.1	peptidyl-prolyl cis-trans isomerase FKBP16-3, chloroplastic-like	3	3	15.758	1.8784	5.6	1	2	1	1.8536	5.6	1	2	1	2.2161	5.6	1	2	1	0.461	0.451	0.447	0.717	0.81	0.714	2.053	1.964	2.074	1.64901	0.000759599	4.48197	1.2871e-06	2.71798	9.9478e-06
CSA004815.1	endonuclease III homolog 1, chloroplastic-like	1	1	12.569						1.2701	6.1	1	1	1							1.032			1.042			0.91		1.00969		0.881783		0.873321
CSA004827.1	BTB/POZ domain-containing protein At5g03250-like	1	0	69.441	3.0147	2.3	1	1	1
CSA004829.1	cytochrome P450 86A22	3	3	61.531	17.87	14	7	8	7	31.133	17.5	9	10	9	30.421	19.9	10	12	10	0.937	0.879	0.939	1.263	1.497	1.738	0.541	0.426	0.3	1.63267	0.0137617	0.459891	0.00236668	0.281681	0.00218777
CSA004830.1	dolichyl-diphosphooligosaccharide--protein glycosyltransferase subunit 1B	3	3	53.418	68.268	24.3	13	16	13	171.02	34.4	16	19	16	61.078	25.1	14	17	14	1.11	1.117	1.105	1.073	1.097	1.06	0.745	0.742	0.777	0.969388	0.0404536	0.679472	7.01732e-06	0.700929	3.24183e-05
CSA004831.1	short-chain dehydrogenase TIC 32, chloroplastic	3	3	13.044	10.83	16.8	1	1	1	45.21	28.6	2	2	2	34.382	28.6	2	2	2	1.079	1.14	1.071	0.899	0.906	0.978	1	0.908	0.924	0.845897	0.00714307	0.86079	0.0129813	1.01761	0.689344
CSA004832.1	short-chain dehydrogenase TIC 32, chloroplastic-like	3	3	31.408	29.143	13.4	2	3	1	16.504	13.4	2	3	1	18.741	15.8	3	4	2	0.987	0.967	1.05	0.989	1.034	0.95	1.029	1.01	0.985	0.98968	0.781593	1.00666	0.823921	1.01715	0.568712
CSA004833.1	Short-chain dehydrogenase TIC 32	3	3	9.5688	16.647	19.1	1	1	1	32.44	19.1	1	1	1	18.782	19.1	1	1	1	1.153	1.111	1.095	0.923	0.963	0.963	0.871	0.886	0.908	0.848169	0.00146846	0.793391	0.000342186	0.935416	0.023131
CSA004834.1	aquaporin PIP1-3-like	1	0	9.4521						1.395	11.5	1	1	1
CSA004836.1	aquaporin PIP1-3	3	3	11.902	4.0182	12.7	1	2	1	6.2496	12.7	2	3	2	4.1351	12.7	1	1	1	1.215	1.18	1.221	1.027	0.832	0.843	0.673	0.933	0.863	0.747235	0.00916048	0.682799	0.00829787	0.913768	0.481408
CSA004837.1	multiple organellar RNA editing factor 8, chloroplastic/mitochondrial-like	3	3	37.104	40.159	16.2	5	10	5	45.32	23.8	7	13	7	27.603	14	4	11	4	1.261	1.116	1.228	0.873	0.873	0.855	0.834	0.835	0.851	0.721498	0.00164353	0.699029	0.00121747	0.968858	0.0295131
CSA004838.1	plant intracellular Ras-group-related LRR protein 6-like isoform X1	3	3	92.564	4.1706	3.6	3	3	3	15.455	6.4	4	5	4	13.73	7.7	4	4	4	1.286	1.252	1.136	0.829	0.905	0.868	0.788	0.793	0.955	0.70822	0.00209436	0.690256	0.0059768	0.974635	0.728494
CSA004842.1	granule-bound starch synthase 1, chloroplastic/amyloplastic-like isoform X1	3	3	70.998	16.318	10.5	6	8	6	7.8825	6.8	4	5	4	13.795	9.3	5	6	5	0.803	0.821	0.696	1.206	1.183	1.321	1.062	1.05	1.073	1.59914	0.00131631	1.37284	0.0018863	0.858491	0.0154637
CSA004843.1	pyruvate dehydrogenase E1 component subunit alpha-3, chloroplastic	3	3	48.235	72.111	38	14	21	10	102.08	41.2	16	23	9	76.771	31.4	12	18	6	1.089	1.055	1.12	1.237	1.156	1.307	0.662	0.447	0.411	1.13358	0.0376596	0.465686	0.00195702	0.410811	0.00126137
CSA004854.1	lactation elevated protein 1-like isoform X1	3	2	43.992	9.4398	13.7	4	4	4	28.375	20.9	6	7	6	7.4475	6.4	2	2	2		0.857	0.837		1.127	1.045		1.061	1.177	1.28217	0.0297931	1.32113	0.0437698	1.03039	0.687887
CSA004860.1	ferritin-2, chloroplastic	3	3	29.627	145.18	54	11	17	11	176.04	54.3	11	15	11	128.65	50.9	10	18	10	1.043	1.15	1.069	1.023	1.009	0.995	0.82	0.799	0.844	0.927958	0.0778199	0.755058	0.00155672	0.813677	0.000252483
CSA004861.1	probable inactive receptor kinase At2g26730	2	1	71.148	12.672	6.6	3	3	3	5.1326	4.7	2	2	2						1.113			1.075			0.763			0.965858		0.685535		0.709767
CSA004863.1	cytosolic endo-beta-N-acetylglucosaminidase 1 isoform X2	3	3	79.868	74.358	20.6	12	17	12	104.46	21.4	13	15	13	82.342	22.4	13	16	13	0.747	0.766	0.76	1.151	1.145	1.175	1.199	1.152	1.166	1.52706	3.12941e-06	1.54729	1.02347e-05	1.01325	0.40989
CSA004880.1	protein argonaute 2-like	2	1	53.958	2.7705	2.5	1	1	1						3.4592	4	2	2	2			1.095			1.046			0.818	0.955251		0.747032		0.782027
CSA004895.1	probable inorganic phosphate transporter 1-3	3	3	58.631	42.948	10.5	4	4	3	52.527	12	5	5	5	46.326	12	5	5	4	0.618	0.596	0.624	1.048	1.019	1.091	1.457	1.465	1.397	1.71817	4.08982e-05	2.34984	3.62368e-06	1.36764	0.000207296
CSA004900.1	dammarenediol II synthase-like	3	3	10.047	14.473	17	1	2	1	23.812	17	1	2	1	34.421	17	1	2	1	0.454	0.409	0.206	0.941	0.968	0.968	1.82	1.852	2.134	2.6913	0.00142524	5.43124	0.000230281	2.01807	0.000620558
CSA004906.1	SNARE-associated-like protein	3	3	22.82	19.715	7.8	1	1	1	18.636	7.8	1	1	1	13.166	7.8	1	1	1	0.848	0.886	0.818	1.01	1.198	1.131	1.199	0.944	1.11	1.30839	0.0109049	1.27469	0.0390076	0.974244	0.772786
CSA004909.1	photosystem II 10 kDa polypeptide, chloroplastic	3	3	14.263	49.623	23.2	3	11	3	66.112	23.2	3	11	3	69.329	23.2	3	9	3	0.49	0.445	0.431	0.712	0.729	0.712	1.97	2.045	2.098	1.57613	0.000149133	4.47511	2.73921e-06	2.83929	3.91291e-06
CSA004910.1	peroxisomal and mitochondrial division factor 2	3	3	46.696	97.969	37.3	17	29	17	121.49	37.3	17	25	17	96.607	36.6	16	23	16	1.103	1.116	1.086	0.95	0.945	0.984	0.896	0.871	0.887	0.871104	0.000697899	0.803026	4.41428e-05	0.921848	0.00626821
CSA004911.1	serine/threonine-protein phosphatase 7 long form homolog	3	3	188.96	107.79	10.5	12	23	7	165.84	11.1	12	19	9	100.23	10.5	13	20	9	1.335	1.232	1.286	0.95	0.957	0.905	0.588	0.687	0.658	0.729821	0.00051432	0.501687	0.000106259	0.687411	0.000952442
CSA004912.1	ribose-phosphate pyrophosphokinase 4	3	3	35.62	66.214	28.2	7	10	7	71.03	23.5	6	10	6	121.05	34.2	8	12	8	1.322	1.576	1.43	0.816	0.698	0.745	0.705	0.548	0.68	0.52195	0.00105349	0.446627	0.000827464	0.855688	0.142178
CSA004913.1	conserved oligomeric Golgi complex subunit 5	3	3	15.953	8.473	44.7	5	6	5	5.3713	31.2	3	3	3	5.6409	22	3	3	3	1.128	1.21	1.16	1.044	1.069	1.052	0.733	0.635	0.723	0.904803	0.0112925	0.59777	0.00028039	0.660664	0.00036321
CSA004915.1	conserved oligomeric Golgi complex subunit 5	3	2	46.572	1.6596	4	2	2	2	5.7242	6.6	2	2	2	9.9428	8.7	3	3	3	1.21	1.089		0.969	1.012		0.743	0.863		0.861679	0.131627	0.698565	0.0554857	0.810702	0.0987321
CSA004916.1	conserved oligomeric Golgi complex subunit 5	3	2	13.289	2.9408	17.2	2	2	2	8.0299	23.3	3	4	3	6.5585	23.3	3	4	3		1.167	1.193		1.014	1.035		0.753	0.696	0.86822	0.0113524	0.613983	0.00469608	0.707174	0.0100951
CSA004920.1	cellulose synthase A catalytic subunit 1	3	3	122.05	22.889	11.3	10	12	3	42.537	12	10	10	2	27.179	9.5	8	9	3	1.594	1.288	1.55	0.794	0.958	0.849	0.4	0.647	0.403	0.586868	0.00466704	0.327166	0.00138693	0.557478	0.015607
CSA004921.1	adenine nucleotide transporter BT1, chloroplastic/mitochondrial	3	2	42.937	3.0743	8.5	3	3	1	13.54	9.3	3	3	2	11.575	12.3	4	4	3	0.921		1.003	1.143		1.093	0.955		0.895	1.16216	0.0831141	0.961538	0.542162	0.82737	0.0385866
CSA004922.1	autophagy-related protein 3	1	0	33.493											4.0241	8.3	2	2	2
CSA004930.1	naringenin,2-oxoglutarate 3-dioxygenase	3	3	41.435	323.31	66	21	58	21	323.31	73.6	23	59	23	323.31	70.4	21	60	21	1.448	1.441	1.435	0.582	0.602	0.62	0.83	0.814	0.836	0.417206	2.17914e-07	0.573543	1.37494e-07	1.37472	6.09412e-05
CSA004935.1	26S protease regulatory subunit 8 homolog A	3	3	40.904	252.29	57.2	20	37	4	278.14	60.8	22	44	4	285.77	60.5	21	37	4	0.977	0.983	1.035	1.088	1.065	1.058	0.977	0.94	0.935	1.07212	0.0247134	0.952254	0.103495	0.888197	0.00172839
CSA004973.1	DNA-directed RNA polymerases II and IV subunit 5A	3	3	24.382	6.8372	13.6	3	3	3	6.8464	13.6	3	4	2	9.9888	19.9	4	5	3	0.983	0.964	0.94	1.062	1.074	1.134	0.957	0.97	0.938	1.13266	0.0074666	0.99238	0.661345	0.876147	0.00501049
CSA004977.1	6-phosphogluconate dehydrogenase, decarboxylating 1, chloroplastic	3	3	52.752	32.355	41.6	17	22	5	50.094	33.1	15	22	6	41.865	30.1	11	14	5	0.861	0.918	0.931	1.013	1.149	1.066	1.134	0.954	1.014	1.19114	0.018558	1.14465	0.0840619	0.960967	0.559576
CSA004981.1	patatin-like protein 2	3	3	30.564	82.235	16.9	4	5	4	103.22	16.9	4	5	4	6.6502	8.6	2	4	2	1.007	1.007	0.976	1.333	1.367	1.357	0.631	0.623	0.649	1.35686	1.61311e-05	0.636455	9.49955e-06	0.469066	5.8318e-07
CSA004982.1	peptidyl-prolyl cis-trans isomerase CYP40	2	1	43.739						2.8599	10.9	5	9	1	1.7175	5.8	3	6	0		1.239			0.953			0.721		0.769169		0.581921		0.756558
CSA004984.1	RNA-binding protein CP29B, chloroplastic	3	3	35.742	34.461	13.4	4	5	4	14.686	17.8	4	5	4	32.255	17.4	5	8	5	0.786	0.771	0.738	1.348	1.547	1.446	0.929	0.836	0.878	1.8915	0.000323589	1.15163	0.0188409	0.608846	0.000872054
CSA004989.1	hydroxyphenylpyruvate reductase-like	3	3	34.1	75.979	25.2	5	7	4	114.32	50.2	11	15	9	120.64	33.2	8	10	6	0.872	0.886	0.889	1.044	0.976	0.956	1.093	1.037	1.144	1.12429	0.015601	1.23687	0.00262744	1.10013	0.0715914
CSA004990.1	photosystem I reaction center subunit VI, chloroplastic-like	1	1	18.398											96.894	29.5	3	7	3			0.384			0.713			2.162	1.85677		5.63021		3.03226
CSA004991.1	dnaJ homolog subfamily B member 6-B	1	1	15.469						1.1688	7.5	1	1	1							0.694			1.002			1.422		1.4438		2.04899		1.41916
CSA004997.1	G-type lectin S-receptor-like serine/threonine-protein kinase At2g19130	2	1	85.38	1.6517	1.1	1	1	1						1.49	1.1	1	1	1	0.837			1.276			0.927			1.52449		1.10753		0.726489
CSA005000.1	vacuolar protein sorting-associated protein 45 homolog	3	3	22.644	13.094	16	3	3	3	4.8708	9.5	2	2	2	4.8737	14	3	3	3	1.163	1.07	1.103	1.026	0.975	1.013	0.802	0.93	0.844	0.903477	0.0263607	0.772182	0.00550385	0.854678	0.0229461
CSA005001.1	LOW QUALITY PROTEIN: vacuolar protein sorting-associated protein 45 homolog	3	3	29.975	35.083	22.2	4	6	4	9.5586	16.1	4	4	4	39.735	31	6	7	6	1.106	1.094	1.077	1.019	1.028	1.051	0.844	0.871	0.839	0.945377	0.00934785	0.779371	5.01536e-05	0.824403	0.000191957
CSA005002.1	vacuolar protein sorting-associated protein 45 homolog	3	2	16.611	4.3951	15.2	2	2	2	5.6867	15.2	2	4	2	4.8188	15.2	2	2	2		1.16	1.07		0.943	0.967		0.84	0.939	0.856502	0.0752835	0.797758	0.0778677	0.931414	0.327231
CSA005006.1	probable Xaa-Pro aminopeptidase P	3	3	87.491	87.258	17.8	13	16	13	97.233	18.5	12	15	12	61.851	9.9	7	10	7	0.726	0.7	0.691	1.319	1.358	1.402	0.975	1.034	1.06	1.92678	1.52215e-05	1.44969	0.000310718	0.75239	0.00063478
CSA005007.1	kinesin-4	2	2	98.79	1.5889	0.8	1	1	1	1.3329	0.8	1	1	1						1.047	1.011		0.998	0.98		0.937	1.007		0.961127	0.185199	0.944606	0.284531	0.982811	0.684372
CSA005009.1	splicing factor 1	3	2	87.161	19.52	10.2	6	8	4	39.481	12.7	8	10	5	10.293	7.5	5	6	2	1.315	1.21		1.013	0.924		0.741	0.872		0.767129	0.050669	0.638812	0.0322571	0.832731	0.177411
CSA005011.1	polyubiquitin-like	2	2	42.751						256.1	57.3	6	68	3	231.04	69.9	7	92	3		1.183	1.205		0.969	0.98		0.747	0.753	0.816164	0.00312455	0.628141	0.000658792	0.769625	0.000777857
CSA005015.1	NADPH-dependent 1-acyldihydroxyacetone phosphate reductase	1	0	30.335											3.2435	6.8	2	2	2
CSA005018.1	4-sulfomuconolactone hydrolase	3	3	36.946	48.72	21.9	5	6	4	58.501	21.9	5	7	4	53.134	21.9	5	8	4	0.867	0.893	0.877	0.894	0.923	0.993	1.299	1.231	1.229	1.0656	0.130177	1.42548	0.00010266	1.33772	0.00106188
CSA005019.1	photosynthetic NDH subunit of lumenal location 5, chloroplastic	2	2	26.437						1.9769	40.5	10	33	1	2.369	40.5	10	35	1		0.871	0.933		1.141	1.089		1.027	0.996	1.23614	0.0342395	1.1214	0.0872702	0.907175	0.0759205
CSA005020.1	GYF domain-containing protein	3	3	184.81	31.401	8.1	9	10	8	17.111	6.8	9	9	8	14.526	5.8	8	9	7	1.036	1.118	1.034	0.993	0.943	0.925	0.913	0.868	1.034	0.897428	0.0337377	0.882999	0.0936693	0.983922	0.788943
CSA005026.1	60S ribosomal protein L37-3	3	3	10.693	4.6035	33.7	4	5	4	2.6082	7.4	1	4	1	5.801	26.3	3	3	3	1.553	1.568	1.434	0.537	0.617	0.568	0.702	0.629	0.866	0.378046	4.05691e-05	0.482327	0.000658857	1.27584	0.0986298
CSA005027.1	beta-adaptin-like protein A	3	3	91.975	43.693	14.1	8	8	8	63.557	11.9	8	11	8	85.459	15.3	9	10	9	0.991	1.089	1.022	1.033	1.028	1.018	0.977	0.829	0.973	0.992585	0.806206	0.895874	0.130017	0.902566	0.11021
CSA005028.1	GTP-binding protein At2g22870	2	2	37.234	3.5661	6.8	2	2	2						1.4121	3.4	1	1	1	1.056		1.017	1.167		1.033	0.742		0.941	1.06126	0.458878	0.811867	0.194366	0.765	0.163955
CSA005033.1	S-adenosylmethionine synthase 2	3	3	43.081	323.31	77.6	26	121	13	323.31	83.5	28	113	13	323.31	85	26	116	11	1.481	1.509	1.523	0.908	0.898	0.896	0.424	0.399	0.39	0.598715	1.24458e-06	0.268779	2.67961e-07	0.448927	1.35426e-06
CSA005039.1	beta-amyrin synthase	3	2	49.092	3.8304	3.1	1	1	1	11.441	3.1	1	2	1	5.9487	3.1	1	2	1		0.726	0.733		1.006	0.981		1.373	1.389	1.36189	0.00240891	1.89308	0.000179595	1.39004	0.00146359
CSA005045.1	RNA polymerase II degradation factor 1	3	3	73.513	65.253	17.2	7	8	7	88.763	12.8	6	7	6	56.916	15.3	8	8	8	1.099	1.113	1.107	1.019	1.02	1.052	0.842	0.771	0.838	0.931305	0.00278026	0.738475	0.000245189	0.792947	0.00110826
CSA005046.1	SAL1 phosphatase isoform X2	3	3	40.679	55.855	27.6	8	16	8	140.31	36.7	9	16	9	150.21	46.9	11	19	11	1.056	1.113	1.066	1.068	1.045	1.069	0.844	0.775	0.817	0.983617	0.410484	0.753014	0.000565757	0.765556	0.000322188
CSA005049.1	histone deacetylase 14 isoform X3	2	0	38.472						1.1421	5.9	2	2	2	1.3966	2.3	1	1	1
CSA005050.1	histone deacetylase 14	3	0	13.708	2.3066	8.1	1	2	1	4.7209	20.3	2	3	2	2.1249	8.1	1	2	1
CSA005054.1	putative multidrug resistance protein	3	1	123.39	2.3243	0.8	1	1	1	1.9929	0.8	1	1	1	1.872	0.8	1	1	1		1.059			1.098			0.812		1.03683		0.766761		0.739526
CSA005059.1	putative lactoylglutathione lyase isoform X2	3	3	35.573	201.35	47.8	15	47	10	241.74	47.8	15	44	10	213.73	47.8	15	47	10	0.923	1.035	0.966	1.056	1.063	1.054	1.14	0.894	0.983	1.08516	0.0642847	1.03181	0.714654	0.950835	0.509927
CSA005060.1	arogenate dehydratase/prephenate dehydratase 1, chloroplastic	3	3	38.352	10.717	11	4	5	3	6.6554	6.5	2	3	1	15.49	17.2	5	5	4	0.886	1.059	0.96	1.081	1.119	1.06	1.07	0.79	0.99	1.1222	0.0893641	0.981067	0.859555	0.874233	0.183304
CSA005074.1	uncharacterized hydrolase YNR064C isoform X1	3	3	47.368	59.257	32.3	11	15	11	64.472	21.9	9	14	9	98.26	30.4	11	14	11	0.587	0.591	0.589	1.042	0.953	1.022	1.45	1.617	1.531	1.70741	0.000102647	2.60215	4.02358e-05	1.52403	0.000674203
CSA005083.1	pumilio homolog 24	1	0	75.359											2.5707	2.4	1	1	1
CSA005086.1	methionine S-methyltransferase isoform X1	3	3	121.23	102.56	16.2	15	20	11	54.27	14.5	13	16	11	72.112	17.8	17	18	13	1.22	1.242	1.175	1.005	1.015	1.001	0.724	0.642	0.759	0.83063	0.000522658	0.584273	0.000225834	0.703409	0.001026
CSA005087.1	probable sucrose-phosphate synthase 3	3	3	119.74	41.821	10.8	11	12	9	42.764	10.3	10	10	8	28.202	9.8	9	11	7	0.566	0.393	0.701	0.983	0.97	0.981	1.687	1.92	1.378	1.76747	0.00890977	3.00301	0.00356769	1.69905	0.0121204
CSA005089.1	putative golgin subfamily A member 6-like protein 6	2	1	22.644	3.1729	10.5	2	2	2						1.5204	5.8	1	1	1	1.144			1.008			0.792			0.881119		0.692308		0.785714
CSA005091.1	actin-related protein 2/3 complex subunit 4	3	0	14.937	1.7972	6.3	1	1	1	1.4118	6.3	1	1	1	1.7258	6.3	1	1	1
CSA005101.1	disease resistance protein RPM1-like	3	3	105.69	9.3639	4.5	4	5	3	9.9915	6.1	5	5	4	9.9257	6.1	5	5	5	0.905	0.857	0.946	1.053	1.075	1.117	1.075	1.116	0.948	1.1983	0.0049231	1.15916	0.0645115	0.967334	0.548218
CSA005102.1	ORM1-like protein 2	3	3	18.165	2.8703	5.8	1	3	1	2.7626	5.8	1	2	1	3.2366	11	2	4	2	0.966	1.086	1.204	1.047	1.033	0.908	0.996	0.846	0.817	0.91769	0.335569	0.816646	0.0872933	0.889893	0.196903
CSA005103.1	26S proteasome non-ATPase regulatory subunit 4 homolog	3	3	42.378	46.624	32	9	15	4	27.08	34.5	10	18	5	40.391	25.8	8	12	4	1.108	1.098	1.141	1.034	1.052	1.059	0.799	0.809	0.741	0.939647	0.0108502	0.701823	0.000180404	0.7469	0.000294242
CSA005110.1	mannosylglycoprotein endo-beta-mannosidase	3	3	67.676	65.788	19.1	9	14	9	98.585	26	12	18	12	58.515	25.5	12	17	12	0.803	0.791	0.758	1.246	1.169	1.158	1.027	1.085	1.151	1.51913	0.000188973	1.38733	0.00136485	0.913238	0.0845474
CSA005111.1	mannosylglycoprotein endo-beta-mannosidase-like isoform X2	3	3	27.025	13.524	21.5	4	7	4	29.244	35	6	8	6	30.162	20.7	4	9	4	0.762	0.755	0.732	1.21	1.244	1.198	1.172	1.12	1.069	1.62383	9.19598e-06	1.49444	0.000283321	0.920318	0.0415543
CSA005112.1	mannosylglycoprotein endo-beta-mannosidase-like	3	3	20.615	31.664	21.5	3	4	3	51.294	21.5	3	6	3	73.651	16.7	2	4	2	0.734	0.743	0.698	1.092	1.122	1.171	1.363	1.186	1.233	1.55632	0.000113866	1.73885	0.000609037	1.11728	0.0836299
CSA005115.1	uridine kinase-like protein 3	3	3	63.225	17.697	15	7	8	4	5.8427	12.9	6	7	3	36.895	18.2	8	8	5	1.25	1.055	1.289	0.9	0.988	0.917	0.761	0.938	0.69	0.780467	0.0271479	0.664719	0.0177305	0.851693	0.152106
CSA005116.1	fructose-bisphosphate aldolase, cytoplasmic isozyme 1	3	3	38.586	323.31	57.4	15	40	14	323.31	67.8	17	47	16	323.31	63	18	45	17	0.252	0.369	0.321	0.824	0.853	0.811	2.197	2.009	2.139	2.64119	0.000140704	6.73567	1.01749e-05	2.55024	2.28029e-05
CSA005117.1	sufE-like protein 1, chloroplastic/mitochondrial	3	2	14.422	2.5788	14.8	2	2	1	2.212	6.7	1	1	1	33.498	27.4	2	2	1		1.259	1.165		0.979	0.92		0.664	0.859	0.783416	0.041899	0.6283	0.0531634	0.802001	0.206242
CSA005123.1	peroxisome biogenesis protein 19-2-like	3	3	28.067	13.89	21.9	4	4	4	13.144	11.3	3	3	3	21.117	14.2	4	4	4	1.182	1.118	1.153	0.889	0.93	1.005	0.868	0.912	0.783	0.81784	0.00561252	0.742253	0.00214577	0.907578	0.16234
CSA005135.1	uridine kinase-like protein 1, chloroplastic	3	3	72.752	22.182	13.4	8	9	4	33.277	13.4	7	7	4	9.9596	12.5	7	7	3	1.02	1.031	0.973	1.234	1.267	1.16	0.723	0.669	0.865	1.21065	0.00425739	0.746362	0.0138663	0.616498	0.00214397
CSA005140.1	3-phosphoshikimate 1-carboxyvinyltransferase 2	3	3	55.703	171.76	32.5	15	30	15	150.33	33.7	15	24	15	134.84	28.3	13	26	13	1.018	1.085	1.057	1	0.972	0.996	0.986	0.946	0.934	0.939241	0.0397834	0.906962	0.0172274	0.965633	0.131722
CSA005144.1	40S ribosomal protein S13	3	3	17.126	63.181	49.7	8	25	1	69.391	57	9	23	1	20.348	57	9	24	1	1.899	1.837	1.759	0.56	0.578	0.662	0.23	0.299	0.316	0.327571	1.78064e-05	0.153776	5.6161e-06	0.469444	0.00148058
CSA005149.1	dammarenediol II synthase-like	2	2	23.292	2.5048	11.3	2	2	1						3.7767	11.3	2	3	1	0.32		0.321	1.012		1.029	1.93		1.909	3.18409	0.000147926	5.98908	4.32153e-05	1.88094	0.000225734
CSA005154.1	rab-like protein 6	1	0	43.757						1.6399	2	1	1	1
CSA005158.1	protein DOWNY MILDEW RESISTANCE 6-like	3	1	17.329	3.9103	10.7	1	1	1	14.045	10.7	1	1	1	5.8558	10.7	1	1	1			0.8			1.235			1.023	1.54375		1.27875		0.82834
CSA005172.1	cysteine desulfurase 1, chloroplastic	3	3	53.822	118.63	23.9	8	22	8	44.689	19.9	7	15	7	41.945	16.9	7	18	7	0.726	0.709	0.73	1.13	1.113	1.134	1.175	1.118	1.193	1.55982	1.54223e-06	1.61016	4.77967e-05	1.03228	0.197042
CSA005175.1	translation initiation factor eIF-2B subunit gamma	3	3	49.758	12.671	7.5	3	3	3	23.35	13.1	5	6	5	12.489	10.1	4	4	4	1.04	1.033	1.135	0.853	0.941	0.999	1.103	1.019	0.815	0.870636	0.0615773	0.915524	0.37997	1.05156	0.641521
CSA005180.1	UPF0160 protein	3	3	47.485	79.857	34.7	12	14	9	144.23	34.7	10	14	7	117.07	36.1	11	13	9	0.982	0.901	0.922	1.073	1.026	1.022	1.041	1.136	1.037	1.11266	0.022801	1.14581	0.0280216	1.0298	0.440787
CSA005182.1	transmembrane protein, putative	3	2	35.943	3.5059	8.3	3	3	3	3.1932	7.7	3	3	3	3.8773	7.7	3	3	3		0.88	0.796		0.907	0.932		1.266	1.355	1.09726	0.203987	1.56384	0.0163606	1.42523	0.0136886
CSA005188.1	cyclin-dependent kinase C-2-like	3	3	34.924	17.58	20	5	5	4	16.925	14.3	4	4	3	17.517	14.3	4	5	3	1.273	1.236	1.294	0.803	0.918	0.813	0.834	0.702	0.842	0.666316	0.000474799	0.625296	0.000606999	0.938437	0.423727
CSA005189.1	protein argonaute 4-like isoform X2	3	3	101.51	323.31	41.6	34	80	16	323.31	43.7	36	81	19	298.98	42.6	35	76	17	1.332	1.354	1.407	0.946	0.926	0.935	0.582	0.562	0.518	0.685805	4.87656e-05	0.406059	1.00327e-05	0.592091	4.24177e-05
CSA005190.1	calcineurin B-like protein 01	2	1	24.47	3.2051	5.6	1	1	1						4.8269	11.3	2	2	2	0.991			0.859			1.164			0.866801		1.17457		1.35506
CSA005191.1	RNA-directed DNA polymerase homolog	1	1	33.452	1.4209	3.8	1	1	1											0.907			0.937			1.197			1.03308		1.31974		1.27748
CSA005192.1	dammarenediol II synthase-like	3	3	54.901	13.678	9.3	4	5	3	4.5241	5.1	3	3	2	19.54	9.3	4	5	3	0.523	0.35	0.441	0.964	0.992	0.961	1.699	1.908	1.847	2.21994	0.000466565	4.15068	6.51836e-05	1.86973	0.000176297
CSA005197.1	ribosome biogenesis protein BRX1-like	3	2	28.558	11.251	9	2	3	2	7.1974	13.9	3	3	3	8.4928	18.4	4	5	4	0.835	0.851		1.088	0.983		1.134	1.224		1.22835	0.0683918	1.39858	0.0180055	1.13858	0.173631
CSA005205.1	putative clathrin assembly protein At2g01600	3	2	64.158	11.424	7.6	3	3	2	9.2302	8.1	3	3	3	6.6997	6.1	2	2	2	1.053		1.019	0.954		0.965	0.976		1.011	0.926158	0.0504584	0.958977	0.223639	1.03544	0.204991
CSA005207.1	mitochondrial import inner membrane translocase subunit TIM10	3	3	9.6139	27.086	29.8	3	5	3	24.97	29.8	3	4	3	5.8507	27.4	2	3	2	0.944	0.878	0.896	1	1.021	0.98	1.032	1.197	1.166	1.10412	0.0147937	1.24908	0.0142159	1.13129	0.064951
CSA005209.1	probable serine/threonine-protein kinase At5g41260	3	1	57.677	7.642	12.3	5	7	2	6.2471	12.3	5	6	2	7.5369	12.3	5	7	2	1.324			0.952			0.603			0.719033		0.455438		0.633403
CSA005212.1	aspartic proteinase PCS1-like	2	2	49.878	5.2505	5.4	2	2	2						1.6028	2	1	1	1	1.348		1.259	0.836		0.935	0.695		0.712	0.679325	0.0244317	0.539701	0.00565309	0.794466	0.0684289
CSA005213.1	probable mannitol dehydrogenase	2	1	34.384	2.8058	11.9	3	3	1						3.5496	11.9	3	4	0	0.972			0.873			1.176			0.898148		1.20988		1.34708
CSA005216.1	organic cation/carnitine transporter 7-like	1	1	8.7211	2.3405	14.6	1	1	1											1.2			0.99			0.734			0.825		0.611667		0.741414
CSA005224.1	preprotein translocase subunit SCY1, chloroplastic-like isoform X1	3	3	54.595	38.75	12.9	6	6	6	52.723	12.9	6	7	6	45.058	10.3	5	5	5	0.74	0.763	0.717	1.048	1.048	1.006	1.329	1.244	1.385	1.3973	0.000108207	1.78288	0.000176992	1.27595	0.00274992
CSA005231.1	60S ribosomal protein L13-1	3	2	23.908	57.958	35.7	7	12	2	99.114	44.4	10	17	2	3.3713	30.4	6	11	1	1.025	1.524		0.938	0.644		1.032	0.659		0.620636	0.23694	0.663397	0.302329	1.0689	0.839812
CSA005241.1	phosphoserine aminotransferase 2, chloroplastic	3	3	47.171	162.39	38	14	33	14	139.47	37.6	14	37	14	147.67	44.1	17	43	17	1.139	1.132	1.189	0.994	0.976	0.981	0.798	0.801	0.739	0.85289	0.000823402	0.675723	0.000157699	0.792274	0.000611716
CSA005242.1	aldehyde dehydrogenase family 3 member F1-like	3	3	47.451	89.267	19.3	8	15	8	108.17	20.9	10	17	10	80.28	17.2	7	14	7	0.633	0.605	0.587	1.43	1.388	1.435	1.125	1.131	1.131	2.33041	2.24202e-06	1.85589	2.72514e-06	0.796379	4.33903e-05
CSA005243.1	aldehyde dehydrogenase family 3 member F1-like	3	3	9.108	4.0587	23.7	2	3	2	2.715	11.8	1	2	1	2.9555	11.8	1	2	1	0.476	0.496	0.491	1.414	1.381	1.409	1.279	1.285	1.262	2.87355	1.72331e-07	2.61517	1.08728e-07	0.910086	0.000522445
CSA005252.1	Polyol transporter 5	1	1	37.454	11.734	9.9	3	3	3											0.822			0.948			1.302			1.15328		1.58394		1.37342
CSA005263.1	coatomer subunit beta'-1	3	2	37.902	3.3242	8.8	3	4	2	2.2692	8.8	3	3	2	7.0275	13.9	4	6	3	1.22		1.173	1.007		0.937	0.688		0.829	0.812369	0.0335008	0.633932	0.0276002	0.78035	0.113281
CSA005265.1	nuclear pore complex protein NUP50A	3	3	43.033	94.587	44.5	15	20	13	140.02	37.3	14	19	12	100.19	31.6	11	14	9	1.406	1.455	1.493	0.877	0.841	0.862	0.548	0.535	0.482	0.592559	2.67178e-05	0.35944	8.64422e-06	0.606589	0.000118541
CSA005282.1	protein TRI1-like	3	3	17.013	20.64	28.7	6	10	6	32.025	38.9	7	12	7	29.782	34.4	6	8	6	0.898	0.832	0.889	0.972	1.06	1.009	1.174	1.2	1.158	1.16113	0.0127992	1.34861	0.000223332	1.16146	0.00443776
CSA005283.1	pentatricopeptide repeat-containing protein At5g02860	3	2	92.991	7.8156	2.7	1	1	1	11.178	3.7	2	2	2	10.621	2.7	1	1	1		0.926	0.912		1.024	1.031		1.076	1.089	1.11806	0.00516266	1.17791	0.0033961	1.05353	0.0175438
CSA005288.1	probable isoaspartyl peptidase/L-asparaginase 3 isoform X2	1	0	26.686											4.7425	11.3	2	2	2
CSA005289.1	probable isoaspartyl peptidase/L-asparaginase 3 isoform X1	2	1	13.303	30.586	17.8	1	1	1						21.765	17.8	1	1	1	0.95			0.994			1.076			1.04632		1.13263		1.08249
CSA005290.1	uncharacterized Rho GTPase-activating protein At5g61530-like isoform X2	1	0	41.828											1.4523	2.1	1	1	1
CSA005291.1	protein notum homolog	3	3	38.691	21.877	11.8	3	5	3	4.7849	7.5	2	4	2	19.04	11.8	3	5	3	1.452	0.515	1.412	0.792	0.764	0.801	0.599	1.925	0.649	0.697544	0.328093	0.939035	0.903329	1.3462	0.564873
CSA005296.1	ubiquitin carboxyl-terminal hydrolase 12 isoform X1	3	3	128.64	230.4	32.2	32	43	17	323.31	29.4	30	46	15	247.6	31.3	31	44	18	1.079	1.073	1.061	1.058	1.104	1.066	0.81	0.776	0.821	1.00467	0.757841	0.749144	5.04957e-05	0.745663	0.000153092
CSA005301.1	D-lactate dehydrogenase	3	3	72.196	23.293	13.6	8	10	8	39.75	15.1	9	11	7	23.189	12.5	9	12	7	0.766	0.745	0.754	1.063	1.03	1.062	1.32	1.294	1.281	1.39294	1.82624e-05	1.71965	1.94603e-06	1.23455	9.77167e-05
CSA005304.1	sterol 3-beta-glucosyltransferase UGT80A2	3	3	18.896	16.352	8.2	1	2	1	13.965	8.2	1	1	1	10.893	8.2	1	1	1	1.048	1.093	1.042	0.954	0.949	0.982	0.983	0.926	0.962	0.906378	0.00650139	0.901979	0.0108881	0.995147	0.82312
CSA005315.1	probably inactive leucine-rich repeat receptor-like protein kinase At5g48380	3	0	23.733	6.427	14.6	2	2	2	4.5249	14.6	2	2	2	8.9436	14.6	2	2	2
CSA005316.1	probably inactive leucine-rich repeat receptor-like protein kinase At5g48380	1	1	36.578											1.7046	6.1	2	2	2			0.857			1.197			0.986	1.39673		1.15053		0.823726
CSA005321.1	acyl-coenzyme A oxidase 3, peroxisomal-like	3	3	56.404	13.962	8.9	3	5	3	24.681	9.3	4	4	4	25.881	8.9	3	3	3	1.115	1.076	1.081	0.925	0.896	0.892	0.922	1.007	0.975	0.829156	0.000316042	0.887531	0.0113635	1.0704	0.0769299
CSA005324.1	acyl-coenzyme A oxidase 3, peroxisomal	3	3	38.544	48.595	21.1	5	5	5	21.795	13.2	3	4	3	18.142	17	4	5	4	1.123	1.073	1.05	0.925	0.946	0.99	0.911	0.957	0.941	0.881392	0.0112334	0.865373	0.00459127	0.981825	0.500342
CSA005325.1	acyl-coenzyme A oxidase 3, peroxisomal-like	3	1	9.6919	4.3676	18.4	1	2	1	12.843	18.4	1	2	1	8.7942	33.3	2	2	2		1.01			0.947			1.043		0.937624		1.03267		1.10137
CSA005347.1	probable splicing factor 3A subunit 1	3	3	101.76	219.68	27.1	18	24	18	200.9	31.4	20	28	20	162.17	27.6	19	25	19	1.158	1.159	1.145	0.984	0.964	0.975	0.817	0.791	0.792	0.84431	1.64694e-05	0.693241	3.26473e-06	0.821074	7.10245e-05
CSA005356.1	ubiquitin-activating enzyme E1 1-like	3	3	121.56	127.96	29.8	29	46	16	144.21	37.1	30	43	17	101.55	32.4	29	45	16	1.13	1.177	1.148	0.92	0.884	0.912	0.923	0.867	0.863	0.786107	0.000148112	0.767873	0.000353034	0.976804	0.398339
CSA005360.1	dymeclin	3	1	64.627	2.1293	2	1	1	1	2.0365	2	1	1	1	1.507	2	1	1	1			1.208			0.927			0.791	0.767384		0.654801		0.85329
CSA005363.1	1,2-dihydroxy-3-keto-5-methylthiopentene dioxygenase 2	2	1	26.105						1.9796	7.2	2	2	1	2.3572	7.2	2	2	1		1.044			1.128			0.801		1.08046		0.767241		0.710106
CSA005364.1	1,2-dihydroxy-3-keto-5-methylthiopentene dioxygenase 1-like	3	1	17.51	2.2398	9.7	1	1	1	6.1874	16.7	2	3	2	8.3791	16.7	2	3	2		0.683			1.097			1.333		1.60615		1.95168		1.21513
CSA005367.1	SKP1-like protein 1B	2	1	17.371	4.1222	21.7	5	8	0						4.6138	21.1	4	5	3			1.033			1.012			0.941	0.979671		0.910939		0.929842
CSA005371.1	U1 small nuclear ribonucleoprotein A isoform X2	3	3	16.357	5.2192	15.9	2	3	1	6.0992	15.9	2	3	1	8.5482	15.9	2	3	1	1.196	1.095	1.157	0.924	0.935	0.86	0.81	0.939	0.933	0.788573	0.00294372	0.777842	0.00761259	0.986392	0.810288
CSA005372.1	U1 small nuclear ribonucleoprotein A isoform X1	2	2	12.934	2.3716	16.7	2	3	1	4.7168	16.7	2	2	1						1.223	1.167		0.934	0.881		0.762	0.897		0.759414	0.0175102	0.694142	0.0377271	0.91405	0.394621
CSA005373.1	CBS domain-containing protein CBSX1, chloroplastic-like	3	3	28.374	51.541	39.1	9	18	5	63.065	39.1	9	18	5	62.034	27.9	7	13	4	0.814	0.906	0.872	1.115	1.073	1.05	1.144	1.053	1.095	1.24923	0.00282179	1.27006	0.00342581	1.01668	0.608744
CSA005374.1	splicing factor 3A subunit 2	3	3	25.414	42.335	44	9	10	9	38.529	34.9	8	11	8	51.075	42.7	9	13	9	1.145	1.14	1.148	0.954	0.946	0.966	0.824	0.855	0.825	0.834838	7.18118e-06	0.729391	7.67821e-06	0.873692	0.000501009
CSA005377.1	peptidyl-prolyl cis-trans isomerase FKBP18, chloroplastic	3	3	24.572	9.4029	18.9	4	4	4	6.3414	18.4	4	5	4	7.9219	18.9	4	4	4	0.764	0.877	0.787	0.923	0.923	0.903	1.41	1.263	1.418	1.13221	0.0381424	1.68493	0.000815803	1.48818	0.000919324
CSA005378.1	dolichyl-diphosphooligosaccharide--protein glycosyltransferase subunit 1A	3	3	47.56	58.1	31.7	12	20	12	149.97	42.1	14	21	14	112.52	42.6	14	21	14	1.138	1.164	1.135	1.069	1.053	1.076	0.703	0.721	0.693	0.930463	0.00224264	0.615944	3.67388e-06	0.661976	4.55381e-06
CSA005379.1	dolichyl-diphosphooligosaccharide--protein glycosyltransferase subunit 1A	3	3	17.82	33.123	39.2	6	7	6	45.748	38.6	6	10	6	61.052	48.1	8	10	8	1.046	1.085	1.061	0.959	1.059	1.012	0.916	0.874	0.892	0.949248	0.15687	0.840226	0.00051768	0.885149	0.0208157
CSA005380.1	outer envelope pore protein 21, chloroplastic-like	3	3	19.35	102.57	44.3	5	10	5	67.758	47.3	5	10	5	73.903	55.1	6	8	6	0.856	0.89	0.886	1.084	1.043	1.128	1.025	1.012	1.026	1.2367	0.0014913	1.16375	0.000247449	0.941014	0.0623211
CSA005382.1		1	1	8.2863											1.5736	12.3	1	2	1			1.204			1.247			0.451	1.03571		0.374585		0.361668
CSA005385.1	myeloid leukemia factor 1 isoform X1	2	1	26.164	15.84	12.5	2	2	2						7.4941	9.6	1	1	1	0.903			1.028			1.104			1.13843		1.22259		1.07393
CSA005391.1	stress protein DDR48	3	1	103.78	8.0435	4	3	3	3	37.774	7.1	4	4	4	5.0893	3.3	3	3	3		1.127			0.921			0.909		0.817214		0.806566		0.986971
CSA005396.1	vegetative cell wall protein gp1-like	3	2	43.039	1.31	1.8	1	2	1	1.4143	1.8	1	1	1	1.4305	1.8	1	2	1	1.328	1.517		0.938	0.876		0.612	0.418		0.63761	0.0352644	0.362039	0.0215511	0.567806	0.061341
CSA005397.1	microtubule-associated protein 70-2-like	2	0	69.943	12.365	10	4	4	1						3.0793	9.7	4	5	1
CSA005402.1	dolichyl-phosphate beta-glucosyltransferase-like isoform X1	3	3	27.496	26.373	14.8	4	4	4	17.011	20.1	5	5	5	19.943	14.3	3	3	3	1.155	1.11	1.174	0.963	1.001	1.016	0.826	0.847	0.742	0.866531	0.00344088	0.702239	0.000789142	0.810403	0.00621783
CSA005404.1	actin-97-like	3	3	44.968	34.947	57.6	19	99	1	64.477	57.6	19	97	1	18.224	50.7	18	81	1	1.294	1.283	1.399	0.968	0.94	0.935	0.627	0.692	0.518	0.71504	0.000597523	0.462022	0.000343113	0.646148	0.00293188
CSA005405.1	very-long-chain enoyl-CoA reductase isoform X1	3	3	36.07	11.272	13.1	4	6	4	13.316	18.6	6	8	6	13.334	12.7	4	6	4	0.95	0.948	0.953	1.216	1.255	1.291	0.794	0.828	0.766	1.31954	0.000151412	0.837601	0.00101294	0.634769	8.30767e-05
CSA005411.1	mitochondrial substrate carrier family protein C	3	3	93.269	17.829	3.6	2	3	2	3.7388	2.8	3	3	3	30.642	5.3	3	4	3	0.878	0.842	0.844	0.969	1.059	1.098	1.202	1.086	1.11	1.21919	0.00937764	1.32527	0.00171954	1.08701	0.156462
CSA005413.1	transmembrane protein, putative	2	2	28.853	9.7791	8.5	1	1	1	9.0548	13.1	2	2	2						0.56	0.492		1.191	0.907		1.404	1.803		1.9943	0.0698734	3.04848	0.0335132	1.5286	0.151826
CSA005422.1	DEAD-box ATP-dependent RNA helicase 56 isoform X1	3	2	48.825	3.9917	44.1	18	39	1	323.31	52	20	40	2	4.7543	39.9	16	33	0	1.044	1.004		1.021	1.044		0.917	0.924		1.0083	0.747892	0.898926	0.036396	0.891525	0.0113242
CSA005431.1	acyl-protein thioesterase 2-like isoform X3	1	0	27	4.8232	12.7	3	4	1
CSA005437.1	signal peptide peptidase-like 4	3	0	31.533	1.5322	4.1	1	1	1	2.1489	3.4	1	1	1	2.9892	7.5	2	2	2
CSA005446.1	glutamate--tRNA ligase, chloroplastic/mitochondrial	3	3	63.943	107.01	22.1	10	14	10	148.49	23.2	10	15	10	71.011	26.4	12	17	12	0.795	0.797	0.828	1.322	1.266	1.24	0.979	1.026	0.979	1.58182	5.92371e-05	1.23306	0.000580975	0.779519	0.000617221
CSA005448.1	glutamate--tRNA ligase, chloroplastic/mitochondrial	3	3	15.066	14.351	24.3	2	4	2	11.133	15.7	2	4	2	8.9124	15.7	2	3	2	0.852	0.884	0.892	1.138	1.154	1.222	1.056	0.987	0.91	1.33714	0.000489768	1.12367	0.0691262	0.840353	0.0193562
CSA005451.1	transmembrane protein	1	1	6.935	1.2841	11.7	1	1	1											0.708			1.463			0.905			2.06638		1.27825		0.618592
CSA005452.1	flavin-containing monooxygenase FMO GS-OX-like 7 isoform X2	3	2	36.946	1.5989	2.4	1	2	1	13.768	14	4	4	4	3.6005	5.2	1	1	1		0.91	1.058		0.979	0.961		1.147	0.962	0.985772	0.868357	1.07165	0.612114	1.08711	0.459208
CSA005455.1	structural maintenance of chromosomes protein 2-1-like	3	3	19.851	38.966	49.7	9	16	9	58.674	45.7	8	14	8	31.548	38.3	7	12	7	1.235	1.253	1.22	1.092	1.101	1.128	0.584	0.571	0.557	0.895631	0.000864111	0.461704	7.0375e-07	0.515507	2.28234e-06
CSA005456.1	myosin heavy chain, striated muscle	3	3	19.598	2.8976	5.8	1	1	1	21.303	13.4	2	4	2	20.727	13.4	2	3	2	1.255	1.185	1.281	1.127	1.082	1.014	0.51	0.656	0.596	0.866165	0.0189769	0.473529	0.000217023	0.546696	0.000814107
CSA005457.1	golgin subfamily A member 4-like	3	3	9.7065	7.4093	19.5	2	3	2	14.095	19.5	2	3	2	9.2004	19.5	2	3	2	1.463	1.326	1.154	0.914	0.93	0.9	0.452	0.624	0.895	0.695917	0.0112457	0.499873	0.0138116	0.718294	0.116942
CSA005465.1	L-arabinokinase-like	3	3	109.54	156.65	40.7	30	41	30	245.05	36.3	27	40	27	202.94	41.2	31	43	31	1.082	1.102	1.069	1.092	1.11	1.109	0.767	0.753	0.703	1.01783	0.160394	0.683369	9.26856e-05	0.671398	5.75095e-05
CSA005470.1	proteasome subunit beta type-6	3	3	25.272	139.35	52.1	10	30	10	197.3	66.1	13	34	13	155.06	66.1	13	33	13	1.116	1.139	1.1	1.006	1.014	1.021	0.817	0.808	0.834	0.906408	0.000988641	0.732936	2.57897e-05	0.808616	2.47047e-05
CSA005472.1	glucan endo-1,3-beta-glucosidase 5-like	1	0	51.091											4.3438	8.5	3	3	2
CSA005473.1	DDB1- and CUL4-associated factor homolog 1	1	1	213.72	3.9495	1	2	2	1											1.097			0.896			0.979			0.816773		0.892434		1.09263
CSA005474.1	zinc finger CCCH domain-containing protein 14	2	0	104.24						1.7134	1.5	1	1	1	3.6574	1.5	1	1	1
CSA005479.1	acetylglutamate kinase, chloroplastic-like	3	3	41.63	62.405	16.8	4	9	4	31.553	13.1	3	5	3	64.299	13.1	3	7	3	1.105	1.082	1.043	0.87	0.935	0.912	1.014	0.92	0.982	0.841176	0.00287036	0.902786	0.0337917	1.07324	0.118931
CSA005483.1	NADH dehydrogenase	3	3	28.356	20.161	20.9	5	7	5	13.403	20.9	5	8	5	45.88	20.9	5	6	5	1.042	1.032	1.027	0.952	1.014	1.01	0.951	0.961	0.932	0.95969	0.112054	0.917124	0.00086499	0.955645	0.113278
CSA005484.1	tryptophan synthase alpha chain-like	3	3	38.061	46.188	28.3	8	11	8	174.8	43.1	10	15	10	62.86	28.1	8	13	8	1	0.974	0.984	1.035	1.011	1.002	0.94	0.963	0.978	1.03043	0.073169	0.973969	0.127853	0.94521	0.0197637
CSA005485.1	transcription factor UNE12-like	2	0	30.929	2.3824	8.7	2	3	1						4.8705	8.7	2	3	1
CSA005486.1	V-type proton ATPase subunit F	2	2	14.539	11.302	30.8	3	4	3	21.785	30.8	3	5	3						1.02	0.991		1.016	1.085		0.956	0.921		1.04475	0.352233	0.933366	0.0983736	0.893384	0.101466
CSA005488.1	cytochrome P450 94A2-like	3	3	58.912	5.8332	3.9	2	2	2	3.5287	3.9	2	2	2	5.7067	3.9	2	2	2	0.992	0.969	1.09	1.005	1.03	0.953	1.005	1.011	0.927	0.979351	0.654367	0.964602	0.476848	0.98494	0.692778
CSA005497.1		1	1	6.9081						2.8602	16.9	1	1	1							0.795			0.928			1.362		1.1673		1.71321		1.46767
CSA005498.1	vacuolar protein sorting-associated protein 52 A	3	0	20.675	2.7332	6.5	1	1	1	2.766	6.5	1	1	1	3.4657	6.5	1	2	1
CSA005503.1	5'-nucleotidase SurE	3	3	20.603	59.83	6.5	1	1	1	29.923	6.5	1	2	1	25.971	6.5	1	2	1	1.272	1.277	1.22	0.933	0.909	0.946	0.696	0.715	0.755	0.739719	0.000103146	0.574688	2.91933e-05	0.776901	0.000536731
CSA005509.1	Thylakoid lumenal 19 kDa protein	3	3	26.823	77.865	28.9	5	8	5	64.024	28.9	5	8	5	55.586	29.7	5	6	5	0.761	0.739	0.769	0.855	0.878	0.936	1.487	1.524	1.482	1.17629	0.00658276	1.98017	1.29674e-06	1.6834	2.47706e-05
CSA005513.1	anthocyanin 3'-O-beta-glucosyltransferase-like	3	3	55.59	36.191	20.6	8	11	6	65.7	17.8	7	9	5	42.806	15.8	6	9	4	1.229	1.187	1.231	0.867	0.867	0.833	0.867	0.88	0.86	0.703866	3.92267e-05	0.714834	2.36355e-05	1.01558	0.354989
CSA005521.1	phosphatidylinositol 3,4,5-trisphosphate 3-phosphatase and protein-tyrosine-phosphatase PTEN2A[Vitis vinifera]	3	3	55.228	1.3121	1.4	1	1	1	3.844	4.5	2	2	2	4.9188	4.5	2	2	2	1.784	1.781	1.717	0.617	0.573	0.677	0.328	0.381	0.356	0.353465	6.81459e-06	0.201628	7.76727e-07	0.570434	0.00138334
CSA005523.1	lactoylglutathione lyase isoform X1	3	3	32.683	108.75	54.3	13	22	13	91.513	43.6	11	20	11	82.681	54.3	13	20	13	0.806	0.791	0.767	1.055	1.052	1.034	1.24	1.253	1.28	1.32868	3.87812e-05	1.59602	8.77071e-06	1.20121	9.79677e-05
CSA005531.1	pentatricopeptide repeat-containing protein At3g02650, mitochondrial	3	3	65.366	5.4419	3.2	2	2	2	2.9597	3.7	2	2	2	4.283	1.7	1	2	1	1.23	1.009	1.076	1.135	1.11	1.138	0.535	0.869	0.745	1.02051	0.748649	0.648265	0.0296351	0.635235	0.0136693
CSA005539.1	protein SEH1	3	0	33.225	1.989	3.3	1	1	1	2.4931	3.3	1	1	1	2.2507	3.3	1	1	1
CSA005540.1	RNA-binding KH domain-containing protein PEPPER	3	3	47.571	132.11	38.3	16	22	12	250.11	44.5	16	21	12	132	33.3	15	21	11	1.217	1.257	1.257	0.964	0.975	0.951	0.742	0.736	0.728	0.774591	4.86368e-05	0.591262	3.37273e-06	0.763322	9.17682e-06
CSA005541.1	macrophage migration inhibitory factor homolog	3	3	14.196	116.86	25	2	5	2	96.167	30.3	3	8	3	109.05	30.3	3	5	3	0.461	0.514	0.483	1.026	1.021	1.066	1.699	1.545	1.644	2.13512	1.23716e-05	3.35254	1.78298e-05	1.57019	0.000234062
CSA005543.1	DEAD-box ATP-dependent RNA helicase 57 isoform X1	1	0	60.038	1.4749	1.5	1	1	1
CSA005544.1	crocetin glucosyltransferase, chloroplastic-like	2	1	51.81	3.3782	6.3	2	2	1						5.9932	5.4	2	2	1	0.954			1.011			1.052			1.05975		1.10273		1.04055
CSA005549.1	serine--tRNA ligase	3	3	43.732	140.58	42.9	13	24	13	138.18	34	12	24	12	198.01	32.2	11	24	11	1.186	1.211	1.175	0.949	0.97	0.951	0.777	0.734	0.83	0.803471	4.91476e-05	0.655375	0.000159835	0.815679	0.00349425
CSA005551.1		1	0	7.7139	1.3736	12.1	1	1	1
CSA005554.1	oligouridylate-binding protein 1-like	3	3	18.301	18.54	32	5	10	5	13.054	18.9	3	8	3	27.252	32	5	8	5	1.197	1.009	1.154	1.002	1.062	0.996	0.743	0.921	0.919	0.910714	0.174529	0.76875	0.0341678	0.844118	0.06413
CSA005556.1	oligouridylate-binding protein 1-like	1	0	13.457						4.1275	13.3	1	1	1
CSA005557.1	oligouridylate-binding protein 1 isoform X1	3	3	21.732	4.1997	18.5	4	7	2	3.8461	9.7	2	4	1	3.0201	12.8	3	4	1	1.287	1.168	1.279	0.912	0.994	0.994	0.698	0.773	0.62	0.776647	0.00413473	0.559989	0.000726505	0.721034	0.00655404
CSA005561.1	21 kDa protein	3	2	20.949	18.671	9.2	2	2	2	4.2509	9.7	2	2	2	23.34	16.9	2	2	2		1.389	1.529		0.651	0.724		0.839	0.565	0.471213	0.010309	0.481151	0.0389089	1.02109	0.927871
CSA005566.1	glycerol-3-phosphate acyltransferase 3	3	3	42.666	34.268	9.2	3	3	3	40.925	8.6	2	3	2	63.334	9.2	3	3	3	0.854	0.858	0.906	1.038	1.018	1.061	1.161	1.177	1.063	1.1906	0.00133061	1.29908	0.0026823	1.09111	0.0661587
CSA005568.1	vestitone reductase-related family protein	3	3	38.546	72.953	19.1	6	8	6	85.55	24.9	8	10	8	75.781	22	7	10	7	0.566	0.626	0.613	1.052	1.011	1.033	1.545	1.424	1.461	1.71524	3.83957e-05	2.45429	2.6279e-05	1.43088	0.000295896
CSA005569.1	NAD-dependent epimerase/dehydratase family protein	3	2	8.3466	5.6646	34.2	3	5	3	6.3396	24.7	2	4	2	9.1259	34.2	3	5	3	0.469		0.525	0.979		0.974	1.759		1.685	1.96479	0.00341944	3.46479	0.00143166	1.76344	0.00246535
CSA005570.1	shikimate O-hydroxycinnamoyltransferase	3	2	16.148	18.832	9.4	1	2	1	2.5324	9.4	1	1	1	15.615	9.4	1	2	1	0.896		0.942	1.602		1.502	0.494		0.539	1.68879	0.00747483	0.562024	0.00632958	0.332796	0.00279192
CSA005571.1	translation initiation factor IF-3-like	3	3	33.305	100.89	29.6	7	10	7	111.13	20.9	6	10	6	159.55	24.6	7	9	7	0.716	0.796	0.765	1.735	1.692	1.688	0.745	0.676	0.626	2.24638	4.40129e-06	0.89899	0.139284	0.400196	1.09069e-05
CSA005575.1	programmed cell death protein 4	3	3	79.31	42.816	21	11	13	11	52.555	18.1	10	13	10	40.098	23.8	13	15	13	0.887	0.964	0.938	0.946	0.945	0.985	1.214	1.177	1.174	1.03119	0.329951	1.27824	0.00057476	1.23957	0.000237409
CSA005576.1	probable Ufm1-specific protease isoform X1	2	2	73.353	2.6804	2.6	2	2	2						1.6168	1.1	1	1	1	1.302		1.258	1.19		1.169	0.376		0.46	0.921484	0.0541046	0.326563	0.00301173	0.354387	0.00321654
CSA005579.1	PHD finger protein ALFIN-LIKE 2-like	1	1	27.156											5.709	10.4	2	2	2			1.174			1.085			0.668	0.924191		0.568995		0.615668
CSA005580.1	dnaJ homolog subfamily B member 13-like	3	3	41.298	34.109	19.8	6	7	4	28.869	16.6	5	6	1	10.918	12.3	4	5	1	1.206	0.958	1.138	0.887	0.942	0.899	0.877	1.12	0.919	0.826166	0.0651712	0.883101	0.288989	1.06891	0.460443
CSA005581.1	transcriptional elongation regulator MINIYO isoform X1	3	1	175.83	8.1517	2.5	3	3	3	2.4474	0.7	1	1	1	4.4936	0.7	1	1	1			1.16			0.854			0.936	0.736207		0.806897		1.09602
CSA005583.1	heterodimeric geranylgeranyl pyrophosphate synthase small subunit, chloroplastic-like	3	3	37.221	270.58	49.1	9	16	9	265.78	46.5	12	16	12	257.43	63.5	16	23	16	0.927	0.956	0.926	1.342	1.369	1.233	0.696	0.682	0.739	1.40406	0.000897606	0.753649	0.000308562	0.536765	0.000172074
CSA005585.1	serine/threonine-protein kinase STY46 isoform X2	1	1	57.029											2.3688	7.6	3	3	2			1.156			1.08			0.698	0.934256		0.603806		0.646296
CSA005589.1	histone acetyltransferase GCN5	1	1	7.5524						3.0497	15.9	1	1	1							1.345			0.885			0.647		0.657993		0.481041		0.731073
CSA005590.1	histone acetyltransferase GCN5 isoform X1	2	1	51.001	3.6236	4.6	2	2	2						1.5339	2.9	1	1	1	1.311			0.885			0.693			0.675057		0.528604		0.783051
CSA005591.1	guanylate-binding protein 5	3	0	74.384	5.6623	5.4	3	4	3	5.1598	3.2	2	2	2	4.7233	3.2	2	2	2
CSA005593.1	ABC transporter I family member 19	3	3	32.074	135.15	28.6	4	4	4	91.876	18.1	3	3	3	59.138	17.1	3	3	3	0.827	0.791	0.836	1.158	1.231	1.358	1.069	1.041	0.841	1.52689	0.00199286	1.20253	0.0860618	0.787563	0.0456301
CSA005599.1	stress-response A/B barrel domain-containing protein UP3-like	3	3	41.248	112.11	16.2	7	15	7	57.03	13.8	6	8	6	119.27	16.2	6	13	6	0.89	0.832	0.848	0.986	1.006	1.023	1.173	1.222	1.132	1.17315	0.00187713	1.37237	0.000518228	1.16982	0.00372578
CSA005610.1	probable mannitol dehydrogenase isoform X2	3	3	38.952	27.367	27.1	7	12	4	15.118	23.3	6	9	4	27.321	20.2	6	13	3	0.715	0.679	0.882	1.084	1.206	1.09	1.335	1.223	1.067	1.48506	0.007663	1.59271	0.0107567	1.07249	0.402345
CSA005619.1	BAG family molecular chaperone regulator 4	3	3	59.805	2.4199	1.9	1	1	1	12.207	5.8	3	3	3	7.2647	7.1	4	4	4	0.908	0.985	0.884	1.104	1.005	1.062	1.016	1.015	1.093	1.14188	0.0348991	1.12495	0.044309	0.985178	0.705655
CSA005621.1	transmembrane protein, putative	3	3	16.983	11.266	18.2	3	3	3	10.454	18.2	3	3	3	19.22	18.2	3	3	3	0.976	0.954	0.999	1.189	1.252	1.244	0.831	0.792	0.737	1.25811	0.000441727	0.805736	0.00328335	0.640434	0.000195668
CSA005622.1	transmembrane protein, putative	3	3	32.46	8.5885	9.8	3	4	3	5.0252	9.8	3	4	3	6.9714	9.8	3	4	3	0.993	0.967	0.919	1.25	1.21	1.211	0.74	0.806	0.884	1.2751	0.000481059	0.844043	0.0332284	0.661945	0.000691785
CSA005628.1	chloride conductance regulatory protein ICln	3	3	25.167	12.622	7.8	1	1	1	13.015	7.8	1	3	1	11.153	7.8	1	3	1	1.45	1.569	1.498	0.763	0.768	0.75	0.633	0.463	0.581	0.504981	2.86844e-05	0.371264	0.000100803	0.735204	0.016392
CSA005629.1	transketolase, chloroplastic	3	3	80.78	11.438	14.5	10	19	4	6.6513	13.3	10	17	4	6.1715	12.9	9	17	3	1.114	1.307	1.674	0.907	0.886	0.631	0.942	0.698	0.465	0.591941	0.040579	0.514042	0.0364015	0.868399	0.551641
CSA005641.1	aspartokinase 2, chloroplastic-like isoform X2	3	3	58.864	39.551	20.9	9	11	4	65.734	16.1	6	9	4	70.854	20.5	8	10	6	1.164	0.793	0.981	0.985	1.088	1.005	0.789	1.184	1.063	1.04765	0.697423	1.03336	0.846781	0.986355	0.913481
CSA005645.1	phosphoenolpyruvate carboxylase 4 isoform X2	3	3	79.09	15.239	5.1	4	6	4	16.283	5.1	4	7	4	20.764	8.4	6	9	6	0.575	0.567	0.607	0.829	0.861	0.887	1.773	1.732	1.666	1.47341	0.000184758	2.95655	4.42655e-06	2.0066	1.66598e-05
CSA005647.1	phosphoenolpyruvate carboxylase 4-like	3	3	34.425	21.535	23.3	6	8	6	18.8	15.7	4	9	4	16.74	17	4	5	4	0.69	0.739	0.627	0.831	0.907	0.791	1.611	1.409	1.741	1.23006	0.028429	2.31566	0.000900079	1.88256	0.00190626
CSA005651.1	3-hydroxyisobutyryl-CoA hydrolase 1-like	3	3	37.92	31.085	29.2	10	13	10	31.627	27.1	9	12	8	35.83	38.8	11	14	11	1.015	1.115	1.019	1.007	1.044	1.042	1.026	0.793	0.88	0.982217	0.620367	0.857097	0.117628	0.872616	0.129855
CSA005653.1	Folylpolyglutamate synthase	3	0	70.061	2.2798	1.7	1	1	1	2.9612	2.1	1	1	1	2.0513	2.1	1	1	1
CSA005660.1	leucine aminopeptidase 1-like	3	3	55.649	323.31	59.9	21	62	14	323.31	59	20	60	14	323.31	61.2	21	66	6	0.78	0.751	0.819	1.052	1.064	1.081	1.266	1.262	1.148	1.36043	0.000191439	1.56426	0.000524149	1.14983	0.0156921
CSA005662.1	bark storage protein A	3	3	37.877	3.141	7	2	2	2	10.424	11.9	3	3	3	5.1775	7	2	2	2	0.548	0.638	0.51	1.261	1.201	1.363	1.345	1.284	1.286	2.25531	0.00030475	2.30837	6.64249e-05	1.02353	0.590397
CSA005663.1	dihydrolipoyllysine-residue acetyltransferase component 1 of pyruvate dehydrogenase complex,mitochondrial	3	3	68.958	117.37	24.1	12	20	12	76.023	24.1	11	16	11	120.04	25.4	12	18	12	0.947	0.986	0.989	0.988	0.96	0.977	1.096	1.05	1.049	1.00103	0.952542	1.09343	0.0114857	1.09231	0.00679428
CSA005665.1	pyruvate kinase 1, cytosolic-like	3	3	51.309	275.2	43.8	14	25	10	323.31	53.4	17	33	12	206.57	53.2	18	32	13	0.918	0.895	0.919	1.089	1.073	1.072	1.015	0.986	1.035	1.18375	6.30762e-05	1.11127	0.00336261	0.938776	0.0123799
CSA005667.1	adenylosuccinate synthetase 2, chloroplastic-like	1	1	41.77	1.442	4.3	2	5	1											1.234			0.957			0.723			0.775527		0.5859		0.755486
CSA005669.1	snakin-2-like isoform X1	3	3	6.9152	1.864	12.5	1	1	1	2.4175	12.5	1	2	1	3.9595	12.5	1	1	1	1.468	1.673	1.531	1.022	0.808	1.043	0.328	0.276	0.219	0.61494	0.00341294	0.176156	4.73165e-05	0.28646	0.00110233
CSA005670.1	REF/SRPP-like protein At3g05500	3	3	27.745	17.936	26.2	6	7	6	11.035	17.1	5	5	5	15.185	21.8	6	6	6	0.417	0.451	0.502	1.034	1.016	0.987	1.77	1.742	1.766	2.21679	3.93526e-05	3.85255	9.79488e-07	1.7379	1.33765e-06
CSA005689.1	DNA-directed RNA polymerase I subunit 2 isoform X1	3	1	131.63	4.0541	3.5	4	4	4	8.918	5	6	6	6	8.5246	4	5	5	5			1.306			0.938			0.644	0.718224		0.493109		0.686567
CSA005692.1	probable choline kinase 1	1	1	40.47											2.5641	2.3	1	1	1			0.972			0.971			1.07	0.998971		1.10082		1.10196
CSA005693.1	short-chain dehydrogenase/reductase	3	3	10.881	6.3266	26.7	2	3	2	3.2945	16.8	1	1	1	7.9895	26.7	2	3	2	0.79	0.933	0.867	1.083	0.98	1.025	1.202	1.115	1.158	1.19228	0.0311426	1.3417	0.00365248	1.12532	0.0296749
CSA005694.1	dehydrogenase/reductase SDR family member 12-like isoform X2	1	0	16.015	3.4147	12.3	1	1	1
CSA005710.1	probable envelope ADP,ATP carrier protein, chloroplastic	3	3	45.532	12.422	14.5	6	8	6	13.351	15.2	7	10	7	7.9674	9.2	4	5	4	0.94	0.87	0.911	1.146	1.191	1.228	0.9	0.91	0.858	1.31018	0.000839363	0.980522	0.531254	0.748387	0.000470714
CSA005714.1	FAM10 family protein At4g22670-like	3	2	42.396	3.0242	21.6	9	14	2	22.678	28.4	11	17	5	11.117	22.7	9	12	3		1.466	1.303		0.732	0.736		0.646	0.865	0.530155	0.015346	0.545684	0.0440089	1.02929	0.862503
CSA005715.1	DNA polymerase delta subunit 3 isoform X1	3	3	57.413	10.8	5.9	3	3	3	29.87	8.1	4	4	4	21.7	6.4	4	4	4	1.586	1.648	1.66	0.613	0.652	0.645	0.511	0.48	0.471	0.390274	2.73835e-06	0.298733	1.57913e-06	0.765445	0.000937832
CSA005717.1	gamma-glutamyl hydrolase 2	3	3	42.422	9.2387	5.2	2	2	2	16.895	7.3	3	3	3	58.573	9.9	4	4	4	0.864	0.858	0.869	1.244	1.227	1.263	0.925	0.951	0.897	1.44114	3.95818e-06	1.07024	0.018901	0.742635	6.87165e-05
CSA005723.1	24-methylenesterol C-methyltransferase 2	3	3	40.423	102.39	36.5	11	23	11	148.81	35.7	11	24	10	110.78	35.7	11	23	10	1.137	1.168	1.112	1.178	1.154	1.147	0.647	0.657	0.655	1.01814	0.331546	0.57331	7.87691e-06	0.563093	8.62339e-07
CSA005724.1	clathrin heavy chain 1-like	3	3	46.825	54.459	34.7	13	20	5	93.521	34.7	13	22	5	62.266	32.2	12	20	5	1.01	1.003	1.003	0.963	1.007	1.031	1.036	0.973	0.945	0.995027	0.815326	0.979443	0.486838	0.984339	0.664136
CSA005731.1	glutamine--tRNA ligase, cytoplasmic	3	3	102.95	104.41	30.8	25	32	18	203.89	30.2	24	32	15	133.5	33	27	36	18	1.124	1.104	1.078	0.946	0.952	0.954	0.904	0.931	0.986	0.862674	0.000363949	0.853297	0.00421589	0.98913	0.69191
CSA005732.1	universal stress protein A-like protein	3	3	17.983	5.1901	10.4	2	2	2	9.6783	14.7	3	5	3	28.363	23.9	4	6	4	0.854	0.789	0.792	1.071	1.059	0.973	1.125	1.342	1.317	1.27433	0.00400727	1.554	0.00330717	1.21947	0.0391772
CSA005753.1	chaperone protein ClpB1-like	3	2	113.67	4.0658	1.8	2	2	2	3.4354	1.8	2	2	2	2.4299	0.8	1	1	1		0.88	0.898		1.053	1		1.109	1.142	1.15467	0.0390194	1.26603	0.00625647	1.09644	0.0866941
CSA005756.1	DNA-directed RNA polymerase II subunit RPB2	3	3	134.92	29.655	7.9	9	10	9	37.424	9.2	9	10	9	24.251	6.6	7	9	7	1.121	1.116	1.117	1.2	1.156	1.206	0.63	0.678	0.635	1.06202	0.0118914	0.579308	6.69184e-06	0.54548	1.61575e-05
CSA005760.1	probable ribosome-binding factor A, chloroplastic	3	3	13.792	2.6744	7.5	1	1	1	5.2041	20	3	3	3	4.0833	13.3	2	2	2	0.666	0.724	0.672	1.544	1.413	1.497	0.875	0.935	0.916	2.16004	4.75805e-05	1.32202	0.0009763	0.612034	0.000166982
CSA005762.1	probable ribosome-binding factor A, chloroplastic	3	3	20.622	10.102	14	2	4	2	13.132	14	2	5	2	12.551	14	2	5	2	0.753	0.779	0.856	1.262	1.285	1.143	0.929	0.941	0.82	1.54523	0.0012811	1.12647	0.111087	0.728997	0.00467657
CSA005765.1	cytochrome b6-f complex iron-sulfur subunit, chloroplastic	1	1	24.49	129.14	37.7	7	23	2											0.167			0.427			2.772			2.55689		16.5988		6.4918
CSA005769.1	universal stress protein PHOS32	3	3	19.433	26.844	30.7	4	7	4	33.075	30.7	4	7	4	22.835	30.7	4	9	4	0.843	0.825	0.816	1.098	1.162	1.171	1.079	1.03	1.07	1.38124	0.000203045	1.27979	0.000168793	0.926552	0.037758
CSA005773.1	putative 12-oxophytodienoate reductase 11	1	1	33.901											6.1048	15.3	3	3	1			0.858			1.063			1.128	1.23893		1.31469		1.06115
CSA005796.1	probable U3 small nucleolar RNA-associated protein 7	2	1	60.629	5.1497	4.5	2	2	2	5.4276	5.2	3	3	2						1.355			0.875			0.644			0.645756		0.475277		0.736
CSA005797.1	probable U3 small nucleolar RNA-associated protein 7	2	0	29.931						1.9374	9.5	2	2	1	3.0874	6.1	1	1	1
CSA005805.1	acetolactate synthase small subunit 1, chloroplastic	3	3	12.739	26.29	48.2	6	13	4	60.463	43.8	6	11	3	45.99	48.2	6	12	4	1.074	1.093	1.25	1.057	1.078	1.049	0.836	0.788	0.532	0.931812	0.240788	0.630963	0.0185394	0.677136	0.0224274
CSA005807.1		3	2	9.0611	1.5563	13.2	1	1	1	4.2941	13.2	1	2	1	6.0468	13.2	1	2	1		1.23	1.219		1.067	1.231		0.609	0.448	0.938342	0.45525	0.431605	0.0131749	0.459965	0.0326259
CSA005810.1	acetolactate synthase small subunit 2, chloroplastic-like isoform X2	3	3	13.924	20.398	26.2	3	3	3	10.935	7.9	2	2	2	14.68	15.1	3	4	3	1.094	1.056	1.075	1.01	1.075	1.146	0.86	0.842	0.739	1.00186	0.963232	0.756899	0.00264469	0.755494	0.00841459
CSA005812.1	acetolactate synthase small subunit 2, chloroplastic-like isoform X2	3	3	12.374	57.201	37.5	4	6	4	56.721	58.9	5	7	5	38.684	58.9	5	7	5	1.232	1.267	1.022	1.029	1.06	1.028	0.72	0.643	0.946	0.88526	0.156123	0.65578	0.0272809	0.740776	0.0422811
CSA005813.1	acetolactate synthase small subunit 2, chloroplastic-like	2	1	6.7848						3.0656	17.5	2	2	2	12.093	30.2	3	4	3			0.988			1.011			1.005	1.02328		1.01721		0.994065
CSA005814.1	acetolactate synthase small subunit 2, chloroplastic-like	2	2	5.8478						2.3318	23.1	1	2	1	5.6217	23.1	1	1	1		1.15	1.195		1.198	1.177		0.578	0.539	1.01279	0.607163	0.476333	0.00234322	0.470316	0.00123746
CSA005815.1	phospholipase D alpha 1	3	2	91.13	10.883	19.1	15	25	3	27.285	23.2	16	29	7	19.675	22.9	16	29	6		0.887	0.915		0.877	0.849		1.252	1.281	0.957825	0.194944	1.40566	0.00302721	1.46756	0.0024859
CSA005817.1	sphingosine-1-phosphate lyase	3	3	58.897	11.248	10.6	4	4	4	11.977	7.2	3	3	3	11.933	7.2	3	3	3	1.022	1.022	0.997	1.124	1.032	1.083	0.835	0.935	0.916	1.06511	0.0770816	0.883262	0.0203983	0.829268	0.0104938
CSA005835.1	plant UBX domain-containing protein 7 isoform X1	3	3	51.479	2.2714	4.3	2	2	2	1.1996	1.7	1	1	1	3.2433	4.8	3	3	3	1.088	1.089	1.049	0.904	0.844	0.987	0.982	1.045	0.947	0.847799	0.0197325	0.921885	0.0562591	1.08739	0.189155
CSA005845.1	WD repeat-containing protein 82-B-like isoform X2	2	1	51.426	2.5385	1.8	1	1	1						2.3497	1.8	1	1	1			1.041			0.983			0.962	0.944284		0.924111		0.978637
CSA005851.1	WD repeat-containing protein 11	3	2	90.241	6.4225	3.5	2	2	2	15.645	5.1	3	3	3	9.9402	3.5	2	2	2		1.216	1.291		1.019	0.879		0.681	0.729	0.75708	0.0617781	0.562425	0.00652437	0.742887	0.0809646
CSA005864.1	ALBINO3-like protein 1, chloroplastic	1	1	22.673	1.4267	3.4	1	2	1											0.915			1.093			1.017			1.19454		1.11148		0.930467
CSA005866.1	PGR5-like protein 1A, chloroplastic	3	3	38.174	82.187	28.2	8	10	7	122.33	31.1	9	14	9	56.074	21.5	7	12	7	0.414	0.492	0.413	0.745	0.827	0.831	2.071	1.9	2.013	1.82183	0.000706809	4.53677	1.04522e-05	2.49022	3.18101e-05
CSA005875.1	zinc finger protein BRUTUS	2	0	150.41	1.6394	0.7	1	1	1	1.9161	0.7	1	1	1
CSA005876.1	core-2/I-branching beta-1,6-n-acetylglucosaminyltransferase family protein	3	3	87.535	2.8232	2.1	1	1	1	2.0483	3.1	2	2	2	1.8534	2.1	1	1	1	1.121	0.979	1.259	0.914	0.862	0.854	0.926	1.179	0.799	0.782971	0.0428986	0.864543	0.333056	1.10418	0.465227
CSA005877.1	endoribonuclease LACTB2 isoform X2	3	3	27.469	12.388	14	3	3	3	31.377	9.2	2	2	2	28.102	9.2	2	2	2	1.033	1.068	0.978	1.188	1.168	1.199	0.75	0.725	0.816	1.1546	0.00461157	0.744073	0.00223564	0.644444	0.000123906
CSA005878.1	chaperone protein dnaJ 15-like	3	3	24.804	13.896	21.9	5	5	5	12.746	16.1	4	5	4	9.1309	11.2	2	2	2	1.325	1.1	1.094	0.829	0.811	0.79	0.736	0.947	1.097	0.690537	0.00914819	0.789997	0.129674	1.14403	0.330064
CSA005879.1	chaperone protein dnaJ 15	3	3	33.491	6.5972	11.6	5	6	5	9.3742	19	6	8	6	9.3771	13.6	4	6	4	1.334	1.213	1.267	0.85	0.91	0.893	0.7	0.798	0.746	0.695595	0.000595781	0.588359	0.000312783	0.845835	0.0151788
CSA005882.1	NEDD8-conjugating enzyme Ubc12	2	0	20.705	2.0454	24.9	4	6	1						2.7915	14.9	3	4	1
CSA005884.1	probable NAD(P)H dehydrogenase (quinone) FQR1-like 1	1	0	28.742	2.9191	9.3	2	3	1
CSA005886.1	serine incorporator 3 isoform X1	1	0	45.174						2.0686	4.6	2	2	2
CSA005887.1	DUF21 domain-containing protein At4g14240	3	0	51.889	3.3098	10.1	4	5	1	5.4582	16.4	6	7	2	5.4675	16.4	6	7	2
CSA005888.1	photosystem II Pbs27 protein	3	3	19.071	12.737	22.9	4	10	4	31.827	22.9	4	10	4	28.749	22.9	4	9	4	0.594	0.555	0.559	0.832	0.821	0.79	1.744	1.782	1.802	1.43033	0.000156199	3.11944	5.53724e-07	2.18093	1.40001e-06
CSA005889.1	ubiquitin system component CUE protein	3	0	29.749	2.0263	3	1	1	1	1.8233	3	1	1	1	1.8622	3	1	1	1
CSA005892.1	plant intracellular Ras-group-related LRR protein 1-like	2	1	11.981	1.7767	14	1	1	1	3.0187	14	1	1	1							1.211			0.959			0.753		0.791908		0.6218		0.785193
CSA005896.1	aquaporin PIP1-3	3	3	30.687	39.015	27.2	5	9	5	8.0014	12.5	3	5	3	12.037	12.5	3	7	3	0.986	1.039	1	1.016	1.018	1.022	0.963	0.913	0.982	1.01025	0.5525	0.944793	0.0987781	0.935209	0.0330383
CSA005900.1	SAGA-associated factor 29 homolog	1	0	18.366											13.555	20.5	2	2	1
CSA005903.1	SAGA-associated factor 29 isoform X1	2	1	11.562	2.2681	8.9	1	1	1	1.512	8.9	1	1	1						0.883			0.952			1.214			1.07814		1.37486		1.27521
CSA005907.1	lariat debranching enzyme isoform X1	2	2	47.955	5.4671	5.8	2	3	2	4.4601	5.8	2	3	2						1.122	1.041		0.969	0.937		0.864	1.011		0.881184	0.0982123	0.866852	0.228312	0.983736	0.855817
CSA005911.1	putative GTP diphosphokinase RSH1, chloroplastic isoform X2	1	0	110.96	2.6084	1.4	1	1	1
CSA005912.1	Ras-related protein Rab7	3	3	19.973	10.208	50.6	7	12	2	26.585	57.4	9	14	2	4.108	61.4	9	13	2	0.884	0.922	0.978	1.022	1.007	0.987	1.137	1.08	1.044	1.08333	0.0566578	1.17134	0.0144311	1.08123	0.0475919
CSA005915.1	calcium-binding EF hand family protein	3	3	15.62	109.07	84.2	11	20	9	87.447	66.9	10	21	8	119.59	53.2	8	21	7	0.668	0.629	0.623	1.216	1.179	1.169	1.234	1.263	1.321	1.85625	1.0727e-05	1.98854	2.6873e-05	1.07127	0.0445753
CSA005932.1	DUF1680 domain protein	1	0	43.949	2.0019	4.4	2	2	1
CSA005933.1	proline-tRNA ligase (DUF1680)	2	1	7.1463						7.5508	51.6	2	2	1	3.3312	51.6	2	2	1		1.018			1.117			0.849		1.09725		0.833988		0.760072
CSA005934.1	proline-tRNA ligase (DUF1680)	1	1	22.25						13.246	10.2	1	1	1							1.11			1.089			0.752		0.981081		0.677477		0.690542
CSA005935.1	DUF1680 domain protein	3	3	37.355	78.991	17.1	3	4	3	83.712	17.1	3	4	3	40.143	10.9	2	3	2	0.952	0.951	0.991	1.192	1.163	1.198	0.859	0.825	0.798	1.22771	0.000208612	0.857636	0.00336771	0.698565	6.62447e-05
CSA005937.1	fiber (DUF1218)	3	3	20.279	10.295	6	1	1	1	21.334	6	1	1	1	18.301	6	1	2	1	0.908	0.931	0.949	1.615	1.563	1.555	0.464	0.489	0.472	1.69763	8.24118e-06	0.511119	5.32703e-06	0.301078	6.74466e-07
CSA005938.1	COP1-interacting protein 7	3	0	135.56	3.0928	0.7	1	1	1	2.3599	0.7	1	1	1	3.1433	0.7	1	1	1
CSA005941.1	CBL-interacting serine/threonine-protein kinase 12	2	0	58.586	5.3623	4.8	2	2	2	4.3714	3.2	1	1	1
CSA005954.1	DEAD-box ATP-dependent RNA helicase 21	3	1	80.203	29.732	15.9	10	12	10	42.206	18.9	12	14	3	1.6101	15.6	9	11	1	1.449			0.868			0.527			0.599034		0.363699		0.607143
CSA005957.1	retinoblastoma-related protein-like isoform X4	3	3	115.15	4.2146	2.8	2	2	2	4.6304	3.6	3	3	3	6.1109	2.3	3	3	3	0.074	0.092	1.465	0.651	0.709	0.796	2.659	2.571	0.577	1.32189	0.724441	3.56039	0.165308	2.69341	0.148506
CSA005960.1	serpin-ZX	3	3	28.842	99.605	43.5	10	14	10	115.6	39.7	9	16	9	151.43	42.7	9	14	9	0.978	0.965	0.96	1.061	1.068	1.068	0.984	0.974	0.98	1.10127	7.44074e-05	1.01206	0.128412	0.918987	2.05777e-05
CSA005962.1	DNA-directed RNA polymerase subunit alpha	3	3	50.578	53.448	15.2	5	9	5	46.357	22.9	7	10	7	46.296	15.5	5	9	5	0.917	0.876	0.927	1.325	1.407	1.314	0.707	0.67	0.715	1.4875	0.000184665	0.769118	0.000555445	0.517054	3.63539e-05
CSA005963.1	30S ribosomal protein S8 (chloroplast)	3	3	10.415	15.66	23	3	5	3	22.57	14.9	2	3	2	8.2451	23	3	5	3	0.879	0.846	0.874	1.239	1.271	1.182	0.981	1.011	0.923	1.42055	0.000200757	1.12159	0.0192744	0.789545	0.00211932
CSA005965.1	beta-D-glucosyl crocetin beta-1,6-glucosyltransferase-like	3	2	48.51	2.1301	2.1	1	2	1	2.212	2.1	1	2	1	2.5956	2.1	1	1	1	1.189	1.298		1.096	1.108		0.635	0.471		0.886208	0.12304	0.444713	0.0197325	0.501815	0.0217012
CSA005966.1	NtPRp27-like protein precursor	3	3	25.574	21.458	24	5	7	4	23.703	14.7	4	6	4	22.981	14.7	4	4	4	0.804	0.858	0.816	1.298	1.241	1.307	0.886	0.88	0.895	1.55206	6.5561e-05	1.07385	0.0227436	0.691888	4.81062e-05
CSA005974.1	rhodanese-like domain-containing protein 11, chloroplastic isoform X1	3	3	36.281	113.41	29.4	7	9	7	100.46	29.4	7	9	7	108.93	29.4	7	11	7	0.909	0.893	0.915	1.029	1.066	1.037	1.104	1.043	1.087	1.15274	0.000443902	1.19028	0.000874116	1.03257	0.186812
CSA005976.1	UDP-D-apiose/UDP-D-xylose synthase 2	3	3	43.482	76.111	54	16	29	8	97.979	58.1	20	35	10	132.08	61.4	20	28	12	1.166	1.143	1.174	0.766	0.717	0.684	1.035	1.071	1.098	0.622165	6.77173e-05	0.919897	0.0104848	1.47854	0.000324284
CSA005982.1	grpE protein homolog, mitochondrial	1	1	40.987	2.9169	3	1	1	1											0.946			0.932			1.148			0.985201		1.21353		1.23176
CSA005984.1	Glucan endo-1,3-beta-glucosidase, basic isoform	3	3	33.356	44.165	35	7	11	6	49.091	29.4	6	8	6	47.775	20.3	5	7	4	1.09	1.114	1.13	0.925	0.906	0.913	0.894	0.969	0.89	0.823035	0.000107287	0.825735	0.00235444	1.00328	0.914631
CSA005986.1	uncharacterized SDCCAG3 family protein	3	3	26.286	5.1861	6.6	1	1	1	7.649	6.6	1	1	1	3.7159	6.6	1	2	1	0.846	0.894	0.959	1.225	1.353	1.328	0.97	0.765	0.702	1.4472	0.00140173	0.902927	0.373632	0.623912	0.00551543
CSA005987.1	protein arginine N-methyltransferase PRMT10	3	2	39.14	4.4863	4.6	1	1	1	12.2	8.4	2	2	2	6.6562	4.6	1	1	1	0.929		0.985	1.073		1.09	1.02		0.924	1.13009	0.0510481	1.01567	0.812515	0.898752	0.153746
CSA005991.1	17.3 kDa class II heat shock protein-like	3	3	18.142	292.77	72.7	7	46	5	262.16	72.7	7	46	5	264.98	72.7	7	54	5	0.885	0.917	0.925	0.736	0.707	0.787	1.37	1.313	1.343	0.817748	0.0032846	1.47635	2.97115e-05	1.80538	3.07683e-05
CSA005992.1	isoflavone reductase-like protein	3	3	34.218	38.745	59	15	57	1	22.613	56.8	13	53	1	22.102	59	14	52	1	1.053	0.953	1.021	0.677	0.691	0.649	1.276	1.267	1.338	0.666336	0.000459625	1.28213	0.00153208	1.92414	1.68484e-05
CSA005994.1	mitochondrial-processing peptidase subunit alpha-like	3	3	57.835	39.602	8.5	4	8	1	81.378	6.8	3	5	1	47.287	6.8	3	6	1	1.32	1.131	1.169	0.929	0.908	0.902	0.633	0.918	0.872	0.75663	0.00729491	0.669337	0.0194156	0.884629	0.300793
CSA005998.1	epidermis-specific secreted glycoprotein EP1	1	0	50.285						8.1865	8.3	2	2	2
CSA006000.1	protein NRT1/ PTR FAMILY 8.3-like	3	3	65.253	7.8819	4.9	3	5	3	19.637	6.8	4	7	3	26.091	11	5	7	4	0.88	0.889	0.929	1.049	1.135	1.108	1.095	1.004	0.974	1.22016	0.00257222	1.13899	0.0337033	0.933475	0.175221
CSA006003.1	NADH dehydrogenase	3	3	11.937	13.473	41.2	4	5	4	14.371	41.2	4	6	4	9.3454	32.4	3	5	3	0.793	0.779	0.777	0.975	0.911	0.911	1.314	1.414	1.405	1.19072	0.0024259	1.75947	5.14218e-05	1.47765	0.000316148
CSA006013.1	probable inactive purple acid phosphatase 1	3	3	78.847	40.936	10.9	6	7	3	45.258	11.7	7	8	3	38.404	12.6	7	8	3	0.767	0.73	0.723	1.144	1.107	1.168	1.167	1.253	1.207	1.54009	5.78361e-05	1.63378	7.8182e-05	1.06084	0.0856374
CSA006034.1	fasciclin-like arabinogalactan protein 10	3	3	43.586	8.3835	8.8	4	4	4	9.5503	15.5	6	6	6	19.076	18.6	7	8	7	1.042	0.996	1.045	1.221	1.231	1.14	0.702	0.756	0.788	1.1651	0.00670229	0.728511	0.000714199	0.625278	0.000300874
CSA006037.1	heparanase-like protein 3	3	0	6.9438	4.1261	27.4	1	1	1	1.8928	27.4	1	1	1	2.11	27.4	1	1	1
CSA006038.1	heparanase-like protein 3	3	3	21.429	2.5024	7.9	2	3	2	1.1307	7.9	2	2	1	4.2691	7.9	2	3	1	0.673	0.542	0.521	1.385	1.426	1.527	1.036	1.173	1.094	2.49885	0.000167168	1.90265	0.00108356	0.761411	0.00399165
CSA006042.1	arogenate dehydrogenase 2, chloroplastic-like	3	2	22.925	7.9156	10.4	2	4	2	4.7233	25.2	5	5	5	6.3865	13.4	3	5	3	1.343		1.128	0.888		0.96	0.647		0.866	0.747875	0.110859	0.612303	0.0891198	0.818723	0.283355
CSA006043.1		1	0	6.4521						2.5466	23.3	1	1	1
CSA006044.1	glutamine synthetase nodule isozyme	3	3	39.24	102.18	50	18	79	11	100.1	43.3	14	81	8	121.61	54.5	15	78	9	1.431	1.436	1.344	0.904	0.901	0.921	0.555	0.525	0.589	0.647352	8.44512e-05	0.396343	1.75197e-05	0.612252	5.52521e-05
CSA006049.1	probable inositol transporter 2	3	3	62.687	13.43	10.4	5	6	5	16.362	7.6	4	6	4	62.372	10.4	5	8	5	0.52	0.501	0.525	0.862	0.83	0.851	1.815	1.842	1.822	1.64489	9.77255e-06	3.54398	2.86961e-08	2.15454	1.54056e-07
CSA006052.1		2	0	8.2585	1.9228	20.5	1	1	1						2.7388	20.5	1	1	1
CSA006061.1	2,4-dichlorophenol 6-monooxygenase	1	0	81.769						1.437	1.9	1	1	1
CSA006062.1	4-coumarate--CoA ligase-like 9	1	0	62.378						4.5557	4.4	2	2	2
CSA006070.1	50S ribosomal protein L27, chloroplastic	3	3	20.981	7.4385	12.5	2	2	2	8.3421	12.5	2	2	2	15.852	12.5	2	2	2	1.655	1.816	1.81	0.523	0.417	0.454	0.607	0.5	0.469	0.263965	2.93668e-05	0.298428	5.17644e-05	1.13056	0.308795
CSA006075.1	photosystem I reaction center subunit XI, chloroplastic	3	3	22.998	37.838	16.6	3	4	3	64.506	16.6	3	4	3	18.955	16.6	3	4	3	0.57	0.53	0.63	0.705	0.706	0.775	1.895	1.977	1.754	1.26358	0.0149765	3.25202	5.34688e-05	2.57365	7.73333e-05
CSA006077.1	rhodanese-like domain-containing protein 4A, chloroplastic	2	2	50.261						3.8015	4	2	2	2	3.3824	6	3	3	3		0.807	0.897		1.147	1.279		1.108	0.842	1.42371	0.0456379	1.14437	0.473401	0.803792	0.250125
CSA006080.1	NADH dehydrogenase subunit 9 (mitochondrion)	3	3	8.5505	76.659	27.4	2	3	1	78.434	27.4	2	5	1	59.667	27.4	2	5	1	0.971	0.98	0.983	1	0.971	1.017	1.04	1.06	1.005	1.0184	0.26515	1.05828	0.0258089	1.03916	0.136073
CSA006086.1	ABC transporter C family member 3	1	0	166.76											3.0396	2.1	2	3	1
CSA006089.1	transmembrane protein	3	3	35.581	56.256	32	11	15	11	50.526	25.6	8	10	8	62.143	25.6	7	8	7	0.563	0.57	0.568	1.06	1.016	0.982	1.591	1.636	1.645	1.79777	3.72555e-05	2.8642	3.85223e-07	1.5932	2.75281e-05
CSA006107.1	AMP deaminase-like	1	0	29.673											2.4496	4.7	1	1	1
CSA006118.1	MAP3K epsilon protein kinase 1-like	3	3	30.259	1.9749	6	2	2	2	5.6412	7.1	2	3	2	2.9103	3.4	1	1	1	1.055	1.12	1.126	0.621	0.917	0.924	1.333	0.925	0.908	0.745835	0.0523951	0.959103	0.765215	1.28595	0.242078
CSA006119.1	MAP3K epsilon protein kinase 1 isoform X3	3	3	69.606	26.437	11.2	4	4	4	31.494	8.7	3	3	3	25.264	12.3	5	5	5	1.149	1.237	1.091	0.904	0.85	0.935	0.904	0.861	0.964	0.773368	0.00591914	0.784872	0.00862133	1.01488	0.748692
CSA006120.1	MAP3K epsilon protein kinase 1-like	3	1	39.06	15.4	8.6	2	2	2	25.035	8.6	2	2	2	12.37	5.3	1	1	1		1.215			0.904			0.807		0.744033		0.664198		0.892699
CSA006123.1	MAP3K epsilon protein kinase 1-like	3	1	22.863	3.3301	6.3	1	2	1	7.4297	6.3	1	2	1	5.5657	10.7	2	3	2		1.022			0.953			1.02		0.932485		0.998043		1.0703
CSA006126.1	structural maintenance of chromosomes protein 4	3	3	137.83	26.686	8.2	9	10	9	22.843	10.4	11	12	11	18.403	5.8	7	10	7	1.834	1.842	1.713	0.483	0.48	0.522	0.403	0.396	0.53	0.275561	7.68997e-06	0.246613	2.33601e-05	0.894949	0.317781
CSA006137.1	50S ribosomal protein L24-like	1	0	17.586						1.2304	6.3	1	1	1
CSA006138.1	cleavage and polyadenylation specificity factor subunit 2 isoform X1	3	3	78.387	45.025	13	7	7	7	22.988	9.1	6	8	6	43.23	13.6	8	10	8	1.062	1.077	1.085	0.992	0.983	0.997	0.928	0.854	0.898	0.921836	0.000440367	0.831266	0.00129195	0.90175	0.0112525
CSA006142.1	methylcrotonoyl-CoA carboxylase beta chain, mitochondrial	3	3	64.294	81.471	30.5	13	15	13	122.24	21.6	9	15	9	94.18	22.3	9	13	9	0.842	0.864	0.822	1.057	0.991	0.996	1.132	1.194	1.175	1.20411	0.00214788	1.38489	0.000122938	1.15013	0.00557243
CSA006143.1	thioredoxin M3, chloroplastic-like	3	3	19.786	11.565	16.9	2	3	2	18.24	16.9	3	5	3	34.928	23.7	3	5	3	1.001	1.001	0.972	1.029	0.989	1.002	0.986	1.012	1.079	1.01547	0.371247	1.03463	0.306902	1.01887	0.562207
CSA006145.1	microtubule-associated protein	3	2	29.362	4.6017	12	2	2	2	2.8026	4.9	1	1	1	3.2204	7.9	2	2	2	1.466	1.742		0.633	0.475		0.75	0.54		0.345387	0.0221743	0.40212	0.0311742	1.16426	0.560202
CSA006146.1	mannan endo-1,4-beta-mannosidase 2 isoform X2	2	0	49.723	4.0912	5.8	2	2	2	4.4116	5.8	2	2	2
CSA006150.1	homeobox-leucine zipper protein ATHB-6	1	0	39.3											2.1711	4.2	1	1	1
CSA006152.1	hexokinase-1 isoform X1	3	3	53.601	140.92	45.7	16	27	14	232.33	43.6	16	23	14	145.42	40	14	26	14	0.804	0.827	0.771	1.072	1.038	1.069	1.198	1.188	1.225	1.32348	0.000187614	1.50333	3.34004e-05	1.13589	0.000746636
CSA006156.1	U4/U6.U5 tri-snRNP-associated protein 2-like	3	1	51.77	1.626	2	1	1	1	2.7975	3.1	1	1	1	1.6665	2	1	1	1		0.878			1.062			1.101		1.20957		1.25399		1.03672
CSA006158.1	VIN3-like protein 2 isoform X2	1	0	80.412											2.8687	1.5	1	1	1
CSA006160.1	phospholipid-transporting ATPase 3-like	1	0	80.883						4.6735	2.4	1	1	1
CSA006167.1	WD repeat-containing protein 70	3	2	73.906	1.5732	1.9	1	1	1	5.5711	5.8	4	5	4	3.4184	5.1	3	3	3		1.031	1.258		1.03	0.99		0.925	0.655	0.882481	0.363515	0.690258	0.182156	0.782178	0.248275
CSA006168.1	fe-S cluster assembly factor HCF101, chloroplastic-like	3	3	58.938	39.536	20.5	9	10	9	57.965	21.8	10	12	10	39.983	16.6	8	12	8	0.687	0.724	0.636	1.181	1.185	1.249	1.259	1.211	1.393	1.766	0.00010096	1.88715	0.000547916	1.0686	0.232121
CSA006177.1	cysteine proteinase RD21a	3	3	33.917	15.834	16.3	5	5	4	5.349	9	4	4	3	20.57	16	4	5	3	0.551	0.412	0.49	1.076	1.114	1.11	1.541	1.69	1.586	2.27116	0.000125933	3.31521	4.73304e-05	1.4597	0.000380661
CSA006178.1	Serine/Threonine kinase, plant-type protein, putative	3	3	48.229	6.2788	2.9	1	3	1	8.0029	2.9	1	3	1	10.007	2.9	1	3	1	0.595	0.537	0.454	1.517	1.492	1.649	1.003	1.109	1.055	2.93695	8.70884e-05	1.99685	0.000498469	0.679906	0.000986697
CSA006184.1	ubiquitin carboxyl-terminal hydrolase 18	3	3	43.659	3.4797	3	1	1	1	5.1345	3	1	1	1	3.6358	3	1	1	1	1.165	1.218	1.215	1.017	0.923	0.965	0.753	0.781	0.741	0.807393	0.00199096	0.632296	2.96953e-05	0.783133	0.00209968
CSA006190.1	putative UDP-glucose flavonoid 3-O-glucosyltransferase 3	3	3	53.242	45.963	23	8	10	8	33.002	21.3	9	12	9	46.853	17.7	7	8	7	0.581	0.782	0.695	1.169	0.938	1.066	1.375	1.442	1.496	1.54179	0.0137557	2.09572	0.000378893	1.35928	0.00729162
CSA006193.1	DNA-damage-repair/toleration protein DRT100	3	3	20.137	35.533	31.4	4	9	4	62.543	24.3	3	8	3	20.728	24.3	3	7	3	1.021	1.103	1.109	1.173	1.255	1.177	0.778	0.534	0.658	1.11506	0.0334585	0.609341	0.00517858	0.546463	0.00193641
CSA006194.1	protein PLASTID MOVEMENT IMPAIRED 1	3	3	95.131	89.414	21.2	14	15	14	103.36	27.5	20	22	20	78.95	22.6	16	22	16	0.627	0.548	0.692	1.218	1.254	1.187	1.225	1.383	1.146	1.95983	0.000201466	2.01071	0.0014937	1.02596	0.684052
CSA006196.1	uroporphyrinogen decarboxylase 1, chloroplastic	3	2	47.041	77.368	20.5	6	12	6	112.71	17.9	5	9	1	84.408	20.5	6	11	6	0.696		0.68	1.23		1.179	1.194		1.164	1.75073	0.00266667	1.71366	0.00119662	0.978829	0.479565
CSA006213.1	protein VASCULAR ASSOCIATED DEATH 1, chloroplastic isoform X1	2	0	74.196	2.3652	1.7	1	1	1						2.5094	3.2	2	2	2
CSA006215.1	cationic peroxidase 1-like	3	2	34.423	7.79	16.1	3	5	3	4.7311	11.5	2	4	2	10.1	16.1	3	4	3		0.807	0.838		0.944	0.941		1.328	1.288	1.1459	0.0164265	1.59027	0.00270524	1.3878	0.00299754
CSA006225.1	pyridine nucleotide-disulfide oxidoreductase domain-containing protein 2-like	2	2	14.409	1.7246	10.5	2	2	2						1.6637	10.5	2	2	2	1.004		1.066	0.675		0.694	1.346		1.238	0.661353	0.00844887	1.24831	0.0539892	1.88751	0.00804758
CSA006226.1	subtilisin-like protease SBT1.6	3	3	81.99	66.973	18.8	11	15	11	124	18.9	11	15	11	126.23	18.9	11	17	11	1.286	1.344	1.334	0.918	0.921	0.946	0.662	0.576	0.567	0.702573	3.94061e-05	0.455348	3.37005e-05	0.648115	0.000491273
CSA006228.1	GTP-binding protein YPTM2-like isoform X2	1	1	9.3347						1.2339	47.6	3	4	1							1.196			0.914			0.821		0.764214		0.686455		0.898249
CSA006232.1		3	3	10.849	3.3625	12.6	2	2	2	3.4153	12.6	2	2	2	1.8088	12.6	1	1	1	1.121	1.112	1.144	0.895	0.929	0.925	0.946	0.922	0.882	0.814036	0.000128405	0.814332	0.000568027	1.00036	0.988389
CSA006241.1	DEAD-box ATP-dependent RNA helicase 14 isoform X1	3	3	81.185	51.789	7.5	5	5	3	69.695	11.5	8	11	7	40.274	10.3	7	9	6	1.125	0.566	1.05	0.63	0.768	0.668	1.225	1.826	1.289	0.75374	0.279316	1.58336	0.108559	2.10068	0.0177203
CSA006247.1	vacuolar protein sorting-associated protein 32 homolog 2	3	2	23.591	9.5685	26.4	6	6	3	2.0992	15.6	3	4	1	115.93	28.8	7	8	3	0.958		0.981	1.065		1.052	0.987		0.97	1.0918	0.0213278	1.00928	0.593421	0.924421	0.0174244
CSA006248.1	clathrin interactor EPSIN 1	3	3	60.835	67.753	25.7	12	15	12	58.004	24.2	11	14	11	72.731	18.9	8	13	8	1.424	1.329	1.249	0.853	0.905	0.941	0.641	0.605	0.704	0.674413	0.00155718	0.487256	0.000301278	0.72249	0.00294143
CSA006254.1	kinesin-like protein KIN-5D	3	3	118.07	29.378	10.7	9	9	8	37.733	13.4	11	12	10	10.655	5.9	5	5	4	1.23	1.122	1.265	1.125	1.197	1.193	0.534	0.663	0.425	0.9718	0.525694	0.448438	0.00120744	0.461451	0.000966969
CSA006256.1	translation initiation factor IF-2, chloroplastic isoform X2	3	3	109.65	49.381	12.2	12	15	12	88.546	16.4	14	19	14	55.496	12.5	12	15	12	0.805	0.781	0.747	1.344	1.435	1.391	0.924	0.834	0.846	1.7874	3.97505e-05	1.11616	0.0513804	0.62446	0.000172215
CSA006258.1	endoplasmic reticulum oxidoreductin-1 isoform X2	1	1	55.071											3.7079	4.4	1	1	1			1.191			1.037			0.697	0.870697		0.585223		0.672131
CSA006261.1	receptor-like protein kinase FERONIA	1	0	90.718	1.5391	1.1	1	1	1
CSA006266.1	COP9 signalosome complex subunit 5b	3	3	40.553	26.855	20.5	5	9	5	46.389	32.1	8	11	8	53.868	30.7	8	13	8	1.204	1.115	1.163	0.993	1.036	0.963	0.739	0.836	0.784	0.859276	0.00803267	0.677484	0.000597954	0.788436	0.00386832
CSA006267.1	protein TRI1-like	3	3	15.87	40.531	23.3	3	5	3	29.801	28.8	5	7	5	27.08	24	4	6	4	1.057	0.968	0.93	1.159	1.167	1.166	0.924	0.89	0.897	1.18173	0.00899925	0.917428	0.105596	0.776346	1.67225e-05
CSA006268.1	3-oxo-Delta(4,5)-steroid 5-beta-reductase-like	3	3	46.545	74.212	25.1	9	15	9	142.08	46.5	12	16	12	131.61	38	10	14	10	1.078	1.044	1.063	0.963	0.913	0.925	0.946	0.945	1.007	0.879435	0.00206505	0.90989	0.0136194	1.03463	0.272705
CSA006269.1	signal recognition particle 43 kDa protein, chloroplastic	3	3	31.648	24.261	19.6	6	9	6	81.216	23.8	8	11	8	42.248	22.7	8	9	8	0.847	0.796	0.836	1.254	1.202	1.296	0.913	1.054	0.942	1.51351	0.000171199	1.17346	0.0349621	0.77532	0.00524347
CSA006281.1	amino-acid permease BAT1 homolog isoform X2	3	3	13.033	3.3855	14.2	1	1	1	1.82	14.2	1	1	1	5.0025	14.2	1	2	1	1.195	1.108	1.192	0.88	0.894	0.83	0.859	0.965	0.919	0.745064	0.00100085	0.784835	0.00392091	1.05338	0.271105
CSA006285.1	RING-H2 finger protein ATL20-like	1	0	33.784											1.5208	2.3	1	1	1
CSA006289.1	malonyl-CoA decarboxylase, mitochondrial isoform X1	3	3	19.006	4.4208	12.7	2	2	2	2.0985	4.8	1	1	1	2.6189	4.8	1	1	1	0.856	0.81	0.903	0.896	1.065	0.897	1.311	1.192	1.245	1.1125	0.196671	1.45893	0.000842794	1.31141	0.0107939
CSA006291.1	malonyl-CoA decarboxylase, mitochondrial	3	3	6.7977	2.8205	16.9	1	1	1	2.0102	16.9	1	1	1	2.2613	16.9	1	1	1	0.853	0.94	0.994	1.016	1.059	1.048	1.187	1.019	0.957	1.12056	0.0599468	1.13491	0.192463	1.01281	0.858024
CSA006302.1	snurportin-1	3	0	18.68	5.9228	11.3	1	1	1	12.518	11.3	1	1	1	18.257	22	2	2	2
CSA006306.1	nuclear valosin-containing protein-like	2	0	86.945	11.612	5.1	3	3	0						10.766	3.5	2	2	1
CSA006319.1	geraniol 8-hydroxylase-like	3	3	55.516	15.017	13.1	6	6	2	9.562	11.2	5	6	5	8.99	9	5	6	1	0.534	0.557	0.443	0.759	0.739	0.628	1.905	1.895	2.171	1.38592	0.0211576	3.89244	0.000107241	2.80856	0.000206492
CSA006332.1	small EDRK-rich factor 2-like	3	1	6.7173	1.9975	17.7	1	2	1	1.6618	17.7	1	1	1	2.2329	17.7	1	2	1			1.848			0.422			0.452	0.228355		0.244589		1.07109
CSA006334.1	ATP-dependent Clp protease proteolytic subunit-related protein 2, chloroplastic	3	3	32.152	95.312	24.8	6	10	6	146.18	24.8	6	11	6	100.17	22.4	6	12	6	0.806	0.805	0.841	1.108	1.147	1.086	1.134	1.111	1.133	1.36256	0.000157842	1.37765	2.51609e-05	1.01107	0.558543
CSA006335.1	AT-hook motif nuclear-localized protein 1-like	3	3	34.461	30.597	14.1	3	3	3	45.006	17.7	4	4	4	72.344	14.1	3	3	3	1.197	1.225	1.219	0.959	0.874	0.906	0.748	0.824	0.799	0.752266	0.000329428	0.651195	5.99602e-05	0.865644	0.0213068
CSA006340.1	glucose-6-phosphate 1-dehydrogenase 1, chloroplastic	3	3	67.766	100.96	34.2	19	31	15	149.73	31.2	17	28	11	132.16	34.2	19	30	14	0.745	0.741	0.782	1.26	1.257	1.202	1.074	1.092	1.098	1.63977	2.98601e-05	1.43915	2.40874e-05	0.877655	0.00167922
CSA006342.1	exosome complex component RRP42	3	1	29.887	2.2702	3.8	1	2	1	10.633	17.1	3	4	3	11.594	10.1	2	4	2			1.089			1.039			0.834	0.954086		0.76584		0.802695
CSA006346.1	transcriptional adapter ADA2a	2	1	19.404	4.1753	16.2	2	2	2	1.9412	6.9	1	1	1							1.122			1.016			0.813		0.905526		0.724599		0.800197
CSA006348.1	transcriptional adapter ADA2	3	3	21.671	30.843	12.5	2	5	1	61.091	12.5	2	5	1	43.406	12.5	2	4	1	1.087	0.969	1.104	1.065	1.035	0.892	0.809	1.002	0.973	0.946835	0.457684	0.881013	0.163661	0.930481	0.43696
CSA006350.1	glycine-rich RNA-binding protein 2, mitochondrial-like	3	3	19.928	110.96	41.5	4	8	4	146.78	41.5	4	8	4	152.12	41.5	4	9	4	1.167	1.216	1.215	1.077	1.04	1.075	0.715	0.708	0.581	0.88716	0.00255587	0.556976	0.000333338	0.62782	0.00093357
CSA006351.1	Deoxycytidine kinase	3	2	37.59	13.488	7	2	3	2	13.444	7	2	2	2	6.2413	7	2	2	2	0.733		0.883	1.157		1.214	1.2		0.93	1.4672	0.0423246	1.31807	0.237992	0.898355	0.474569
CSA006354.1	pyrophosphate-energized membrane proton pump 2	3	3	84.457	54.795	11.7	9	14	8	53.351	8.8	6	12	5	39.284	9.4	6	11	5	1.148	1.107	1.183	1.042	1.011	1.028	0.764	0.79	0.681	0.896161	0.00740237	0.650087	0.000531718	0.725414	0.00116266
CSA006356.1	brassinosteroid LRR receptor kinase precursor	2	1	133.56	1.6016	0.8	1	1	1	1.3064	0.8	1	1	1							1.115			0.963			0.881		0.863677		0.790135		0.914849
CSA006358.1	adenine phosphoribosyltransferase 5-like	2	0	20.991	5.7693	16.2	3	3	3	1.5454	4.7	1	1	1
CSA006359.1	vesicle-associated membrane protein 711	3	1	24.991	1.825	21.5	5	8	1	2.1596	22.8	6	8	1	1.5998	18.7	5	7	1	1.268			0.858			0.783			0.676656		0.617508		0.912587
CSA006362.1	CGS1 mRNA stability protein	3	2	63.22	1.6072	4.3	2	2	1	16.049	4.3	2	2	2	10.049	4.3	2	2	1		0.96	0.971		1.014	1.029		1.041	1.009	1.058	0.0264917	1.06163	0.0722076	1.00343	0.861298
CSA006364.1	protein FAR1-RELATED SEQUENCE 6	3	3	86.525	4.5987	1.6	1	1	1	3.6361	1.6	1	1	1	3.5583	1.6	1	1	1	1.083	1.075	1.068	1.106	1.053	1.17	0.77	0.839	0.723	1.03193	0.370988	0.722877	0.000930378	0.700511	0.00223771
CSA006369.1	AP2-associated protein kinase 1 isoform X2	3	3	78.14	10.798	7.1	5	6	5	10.682	9.8	7	7	7	16.954	7.1	5	5	5	1.089	1.125	1.114	0.956	1.008	1.01	0.912	0.897	0.832	0.89363	0.00462881	0.79357	0.00102415	0.88803	0.0214081
CSA006370.1	casein kinase 1-like protein HD16	3	2	78.252	4.7319	3	2	2	1	2.0269	3	2	3	1	5.0064	3	2	2	1	1.557	1.174		0.664	0.841		0.592	0.931		0.55108	0.100839	0.557671	0.14205	1.01196	0.966736
CSA006373.1	metal tolerance protein 4-like	3	2	46.424	3.5734	2.9	1	1	1	6.882	7	2	3	2	7.9476	7	2	2	2	0.986		0.946	0.989		1.144	1.031		0.919	1.10404	0.336062	1.00932	0.893586	0.914205	0.439575
CSA006383.1	phytolongin Phyl1.1	1	0	30.216	1.5	2.6	1	1	1
CSA006386.1	E3 ubiquitin-protein ligase	3	0	14.968	8.5541	13.8	1	1	1	4.9344	13.8	1	1	1	11.639	13.8	1	1	1
CSA006389.1	serine/threonine-protein phosphatase BSL3	3	3	106.38	103.99	29.6	23	28	4	169.89	25	21	27	4	73.544	21.8	18	24	3	1.198	1.024	1.147	0.709	0.972	0.886	1.039	0.926	0.921	0.761947	0.0453523	0.856634	0.066852	1.12427	0.286226
CSA006390.1	J domain-containing protein spf31	3	2	33.351	5.1296	10.3	3	4	3	6.8626	13.9	3	5	3	7.1631	7.1	2	3	2	1.33	1.218		0.895	0.982		0.656	0.718		0.736656	0.041885	0.539246	0.0116823	0.732019	0.0422695
CSA006404.1	Allene oxide synthase	2	1	58.553	6.904	7.6	3	3	1	13.302	6.1	2	2	1						1.125			0.921			0.912			0.818667		0.810667		0.990228
CSA006415.1	transportin-3	1	0	24.882	1.5989	3.5	1	1	1
CSA006423.1	probable glutathione S-transferase	3	3	25.226	63.229	40.4	15	37	11	44.171	40.4	15	32	11	74.512	40.4	13	32	9	0.686	0.654	0.681	0.904	0.873	0.91	1.543	1.614	1.587	1.32954	0.000126949	2.34735	2.44362e-06	1.76554	8.43233e-06
CSA006446.1	plasma membrane ATPase 1-like isoform X2	2	0	40.515	-2	18.7	8	18	0						-2	24.6	8	15	0
CSA006458.1	coatomer subunit beta-1-like	3	3	29.531	-2	17.7	4	7	1	2.6117	24.5	6	9	2	5.2122	24.9	6	10	2	1.399	1.358	1.484	0.906	0.916	0.879	0.549	0.596	0.461	0.636878	0.000186982	0.378684	8.50947e-05	0.594595	0.000886509
CSA006459.1	phosphoglycolate phosphatase-like	3	3	26.525	9.9339	26.9	5	6	5	17.916	27.8	5	6	5	16.385	26.9	5	6	5	0.739	0.705	0.833	1.011	0.995	0.993	1.37	1.414	1.265	1.31708	0.003404	1.77822	0.000540345	1.35012	0.00141988
CSA006483.1	V-type proton ATPase subunit D	3	3	11.875	7.7624	28.7	4	8	4	10.247	37	4	8	3	10.507	37	4	7	3	0.644	1.151	0.935	0.823	1.01	1.015	1.684	0.78	1.074	1.04322	0.817803	1.29597	0.42577	1.24228	0.447891
CSA006495.1	probable E3 ubiquitin-protein ligase LUL4 isoform X1	3	3	49.08	1.8725	2.1	1	1	1	1.2473	4.4	2	3	2	3.2533	4.4	2	2	2	1.024	1.125	0.975	0.882	0.956	0.905	1.094	0.875	1.137	0.878041	0.0615046	0.994238	0.951322	1.13234	0.223239
CSA006497.1	probable pectinesterase/pectinesterase inhibitor 51	3	3	26.553	60.793	23.3	4	6	4	45.803	23.3	4	7	4	68.324	23.3	4	6	4	0.921	0.937	0.881	1.362	1.569	1.257	0.673	0.475	0.888	1.52903	0.0065847	0.743337	0.123513	0.486151	0.00884531
CSA006498.1	pectinesterase family protein	3	3	17.548	5.0305	11.9	2	2	2	4.4328	11.9	2	2	2	5.6344	11.9	2	3	2	0.968	0.934	0.907	1.471	1.457	1.587	0.536	0.597	0.496	1.60733	0.000222234	0.579922	0.000328569	0.360797	4.50663e-05
CSA006499.1	Zinc finger CCCH domain-containing protein 1	3	1	37.21	4.0461	5.5	2	2	2	4.1472	5.5	2	2	2	4.5387	5.5	2	3	2			1.234			0.979			0.699	0.793355		0.566451		0.713994
CSA006515.1	E3 ubiquitin-protein ligase PRT6	3	3	232.59	7.3461	2.3	5	5	5	16.971	4	8	9	8	24.861	5	8	9	8	1.083	1.093	1.126	1.032	1	1.023	0.85	0.875	0.83	0.925197	0.00693191	0.773773	0.000172237	0.836334	0.000495219
CSA006518.1	chaperonin CPN60-2, mitochondrial	3	3	61.647	302.79	59.2	33	81	21	323.31	61.8	34	87	22	323.31	64	36	93	22	1.043	1.034	1.045	0.913	0.911	0.915	1.056	1.051	1.042	0.877322	3.66847e-06	1.00865	0.165489	1.14969	5.60517e-06
CSA006521.1	probable methyltransferase At1g27930	2	1	31.085	14.836	8.6	1	1	1	13.731	11.2	2	2	2						1.346			0.759			0.78			0.563893		0.579495		1.02767
CSA006523.1	cell division cycle protein 48 homolog	3	3	89.749	156.81	58.8	40	86	6	146.53	56.8	39	81	4	151.73	58.3	40	78	5	1.118	1.103	1.132	1.162	1.201	1.162	0.659	0.595	0.626	1.0513	0.0206952	0.560692	1.72884e-05	0.533333	1.7099e-05
CSA006532.1	DEAD-box ATP-dependent RNA helicase 50	3	1	46.562	3.7139	3	1	1	1	6.0376	3	1	1	1	11.501	6.3	3	3	3			0.825			1.432			0.776	1.73576		0.940606		0.541899
CSA006536.1	probable inactive purple acid phosphatase 29	3	3	42.114	13.617	12.9	5	8	3	39.488	20.7	6	8	3	26.816	14.5	5	8	2	0.716	0.912	0.735	1.665	1.26	1.563	0.676	0.84	0.759	1.89928	0.00659806	0.962759	0.727065	0.506907	0.0048269
CSA006539.1	probable inactive purple acid phosphatase 29	3	3	42.209	3.8899	8.5	3	6	1	4.5495	11.9	4	6	1	9.3266	11.9	4	7	1	0.73	0.651	0.594	1.314	1.416	1.434	1.036	1.034	1.093	2.10835	0.000177684	1.60152	0.000837887	0.759606	0.00136841
CSA006542.1	ferredoxin-thioredoxin reductase, variable chain	3	3	16.814	64.305	40.8	6	10	6	75.798	34.9	5	9	5	25.454	38.2	5	9	5	0.513	0.558	0.551	1.018	1.018	0.988	1.672	1.72	1.614	1.86436	1.08815e-05	3.08631	4.7423e-06	1.65542	3.34722e-05
CSA006544.1	DNA topoisomerase 2-like isoform X2	2	0	166.48	1.4097	1.4	2	2	2						1.4093	0.5	1	1	1
CSA006545.1	vacuolar protein sorting-associated protein 35A isoform X1	3	3	60.989	4.5436	8	5	6	3	17.481	17.7	9	11	5	11.743	15.3	7	8	4	0.652	1.011	1.001	0.974	0.999	1.052	1.511	0.986	0.943	1.13551	0.373619	1.29129	0.299948	1.13719	0.494051
CSA006546.1	vacuolar protein sorting-associated protein 35B-like isoform X2	3	3	29.029	14.367	8.1	3	5	3	16.708	8.1	3	4	3	16.789	8.1	3	5	3	0.8	0.83	0.859	0.879	1.046	0.988	1.28	1.049	1.154	1.17035	0.0526155	1.39936	0.00859822	1.19567	0.0834177
CSA006550.1	proteasome subunit alpha type-7	3	3	27.19	147.49	58.2	14	27	6	180.98	57.4	14	26	7	173.53	58.2	14	26	6	1.123	1.107	1.096	1.054	1.059	1.034	0.743	0.834	0.833	0.946182	0.00549977	0.724594	0.000608701	0.765809	0.0013926
CSA006552.1	protein EARLY-RESPONSIVE TO DEHYDRATION 7, chloroplastic-like	3	1	52.665	1.545	4.7	2	2	1	3.4704	7	3	3	2	3.1406	4.7	2	2	1			1.084			1.017			0.865	0.938192		0.79797		0.850541
CSA006555.1		1	1	6.9327	-2	23.4	1	1	1											0.434			0.766			2.036			1.76498		4.69124		2.65796
CSA006565.1	omega-hydroxypalmitate O-feruloyl transferase-like isoform X2	3	3	31.215	6.5256	11.1	3	4	3	14.401	8.2	2	3	2	13.978	11.1	3	5	3	1.01	0.94	1.069	1.109	1.128	1.09	0.869	0.931	0.931	1.10202	0.0574805	0.904604	0.0874519	0.82086	0.00105488
CSA006572.1	probable protein phosphatase 2C 76	3	2	16.291	1.6055	12.9	2	3	1	2.4106	12.9	2	2	1	4.534	19	3	4	2		1.091	1.155		1.129	1.124		0.735	0.651	1.00312	0.923123	0.617097	0.0147457	0.61518	0.00928907
CSA006575.1	guanylate kinase 3, chloroplastic	3	2	26.576	3.2322	5	1	1	1	6.9512	17.5	4	5	4	4.6082	10	2	2	2	1.023	0.575		1.101	1.084		0.859	1.496		1.36733	0.320629	1.47372	0.433558	1.0778	0.814627
CSA006579.1	pyruvate dehydrogenase (acetyl-transferring) kinase, mitochondrial	3	3	24.76	32.344	20.5	4	5	2	42.628	13.5	3	4	1	44.526	22.3	4	5	2	0.999	0.997	0.941	1.107	1.021	1.034	0.886	0.981	0.981	1.07661	0.0843532	0.969697	0.466854	0.900696	0.0650519
CSA006586.1	protein SPIRRIG	3	1	400.29	6.1475	0.8	2	2	2	3.2587	0.6	2	2	2	4.9334	1	3	3	3	1.209			0.908			0.809			0.751034		0.669148		0.890969
CSA006605.1	calcium-transporting ATPase 3, endoplasmic reticulum-type-like	2	2	24.742	19.097	13.4	2	2	2						25.348	10.3	1	1	1	0.944		0.83	1.041		0.971	1.032		1.267	1.13416	0.21719	1.29594	0.182147	1.14264	0.36241
CSA006621.1	elongation factor 1-alpha isoform X1	3	3	78.444	14.449	7.5	5	6	5	30.384	11	6	6	6	18.72	10.4	7	9	7	1.037	0.992	1.1	0.925	0.944	0.956	0.92	1.07	0.909	0.902844	0.035912	0.926494	0.274809	1.02619	0.66416
CSA006624.1	probable sodium/metabolite cotransporter BASS3, chloroplastic	3	1	45.167	4.159	6.1	2	2	2	1.1166	6.1	2	2	2	2.2657	2.3	1	1	1	0.851			0.985			1.223			1.15746		1.43713		1.24162
CSA006626.1	glycerol-3-phosphate dehydrogenase SDP6, mitochondrial-like	3	3	22.186	22.979	23	4	5	4	8.4121	10.2	2	3	2	7.8008	14.8	3	5	3	0.94	0.98	1.016	1.02	1.059	1.112	1.098	1.027	0.857	1.08685	0.0695877	1.01567	0.847576	0.934503	0.412917
CSA006632.1	methionine gamma-lyase	3	3	18.667	20.122	9.7	1	1	1	18.39	9.7	1	1	1	19.663	14.5	2	2	2	0.887	0.853	0.846	1.07	1.059	1.109	1.081	1.139	1.095	1.25213	0.000388331	1.2819	0.000354309	1.02378	0.329535
CSA006637.1	cytochrome b5-like isoform X1	3	3	15.181	106.68	56	7	13	6	74.588	65.7	7	12	6	109.09	56	7	13	6	1.252	1.176	1.183	0.992	0.982	0.963	0.74	0.775	0.787	0.813348	0.000943418	0.637497	9.97314e-05	0.783793	0.000211113
CSA006640.1	probable 6-phosphogluconolactonase 4, chloroplastic	3	3	17.544	10.884	12.7	2	3	1	26.451	29.7	3	5	2	13.927	12.7	2	4	1	1.188	0.994	1.16	0.885	1.017	0.88	0.863	0.99	0.908	0.832436	0.068404	0.826152	0.0526621	0.992451	0.910157
CSA006641.1	probable 6-phosphogluconolactonase 5, chloroplastic, partial	3	3	19.719	80.261	48.3	9	16	6	135.79	48.3	9	16	6	120.59	46.1	8	13	6	1.22	1.181	1.142	0.839	0.871	0.897	0.869	0.888	0.891	0.735817	0.000373131	0.747389	0.000223479	1.01573	0.492953
CSA006642.1	pyridoxal reductase, chloroplastic isoform X2	2	1	36.102						45.278	5.6	1	1	1	7.26	11.7	3	3	3			0.797			0.97			1.314	1.21706		1.64868		1.35464
CSA006643.1	LOW QUALITY PROTEIN: eukaryotic translation initiation factor 2A	3	3	37.476	5.1257	5.3	2	3	2	27.529	14.4	4	5	4	6.0416	11.4	4	5	4	1.09	1.058	1.077	0.904	0.878	0.901	0.979	1.057	1	0.831938	0.000129094	0.941395	0.0659652	1.13157	0.00888919
CSA006644.1	eukaryotic translation initiation factor 2A isoform X2	3	3	15.34	9.6533	23.6	3	3	3	19.901	31.4	3	3	3	9.2365	23.6	3	3	3	1.274	1.251	1.291	0.937	0.932	0.938	0.688	0.688	0.635	0.735587	8.829e-06	0.526992	9.05107e-06	0.716423	0.000117022
CSA006648.1	elongation factor-like GTPase 1	3	2	113.2	15.741	5.8	4	4	4	10.762	4.5	3	3	3	10.723	5.7	4	4	4	0.994		1.017	0.986		1.089	1.024		0.903	1.03182	0.605898	0.95823	0.565623	0.928675	0.449978
CSA006651.1	serine/threonine-protein kinase TOUSLED isoform X1	3	3	101.98	3.0761	2.8	2	3	2	6.353	4.3	3	4	3	6.2163	4.2	3	3	3	1.189	1.225	0.688	0.96	0.984	1.135	0.86	0.719	1.286	0.992585	0.968377	0.923598	0.761465	0.930497	0.710636
CSA006652.1	UBIQUITIN-SPECIFIC PROTEASE 12 family protein	3	3	76.064	42.944	25.5	17	23	7	78.5	27.8	17	26	8	89.717	31.5	18	24	9	1.128	1.143	1.067	0.994	1.015	0.976	0.828	0.805	0.921	0.894248	0.0103727	0.765129	0.00351666	0.855611	0.0181293
CSA006654.1	ubiquitin carboxyl-terminal hydrolase 13-like	3	3	32.208	3.611	14.8	3	3	1	1.7816	18.8	5	6	1	4.3017	19.1	5	7	2	1.014	1.006	0.901	1.018	1.091	1.071	0.961	0.893	1.059	1.08867	0.111573	0.997261	0.966895	0.916038	0.167616
CSA006667.1	glucose-6-phosphate 1-dehydrogenase, cytoplasmic isoform isoform X1	3	3	24.213	18.278	33.2	6	9	5	12.184	25.1	5	10	4	13.46	29.4	6	10	5	0.507	0.731	0.582	1.1	1.118	1.102	1.575	1.234	1.468	1.82418	0.00163483	2.35	0.00243235	1.28825	0.0340812
CSA006668.1	Glucose-6-phosphate 1-dehydrogenase, cytoplasmic isoform 2	3	3	33.052	10.996	22.1	7	12	2	65.41	36.2	10	13	3	47.134	36.9	9	13	3	0.383	0.489	0.346	1.095	0.898	1.224	1.753	1.55	1.664	2.64122	0.00305116	4.078	6.72637e-05	1.54399	0.00637996
CSA006671.1	cyclase-associated protein 1-like	3	3	57.902	39.303	14.9	6	7	6	5.08	7.7	5	7	5	12.724	8.8	5	7	5	1.227	1.223	1.255	0.938	0.929	0.998	0.711	0.683	0.65	0.773279	0.000302693	0.551687	1.07474e-05	0.713438	0.000607639
CSA006674.1	glucan endo-1,3-beta-glucosidase 7-like	3	3	53.376	31.87	17.8	7	9	6	42.24	19.8	8	10	7	79.297	20.4	8	11	7	1.114	1.108	1.064	1.038	1.028	1.073	0.823	0.822	0.845	0.955265	0.0784664	0.75776	0.000109275	0.793246	0.000155607
CSA006677.1	ubiquitin thioesterase otubain-like	3	3	35.364	94.164	23.1	5	8	5	90.892	26.3	6	9	6	44.171	16.7	4	5	4	1.177	1.151	1.245	0.992	0.993	0.982	0.76	0.818	0.674	0.830395	0.00202212	0.630283	0.000942065	0.759016	0.00474903
CSA006680.1	erlin-1	3	3	27.12	19.647	33.2	10	11	7	26.623	33.2	9	10	5	21.863	29.3	8	11	6	1.036	0.998	1.062	1.048	1.029	1.041	0.924	1.006	0.908	1.00711	0.724544	0.916667	0.0730476	0.910199	0.03898
CSA006681.1	erlin-2-B	3	2	13.908	10.115	22.7	2	3	1	5.7834	22.7	2	2	1	11.319	21.1	2	4	2	0.73		1.089	1.238		0.923	1.117		0.96	1.18802	0.548267	1.14184	0.577913	0.961129	0.833591
CSA006685.1	zinc finger CCCH domain-containing protein 41	3	0	120.9	2.2923	1	1	1	1	4.0805	2.4	2	3	2	8.8532	4.5	4	4	4
CSA006687.1	2-isopropylmalate synthase A	3	3	58.446	8.6604	12.4	6	6	6	48.702	15.6	8	9	8	50.351	11.7	6	7	6	1.233	1.233	1.089	0.894	0.915	1.029	0.792	0.769	0.754	0.798312	0.0199556	0.651195	0.0011034	0.815715	0.0158709
CSA006699.1	altered inheritance of mitochondria protein 32	3	3	44.494	159.95	31.4	10	21	9	127.42	29.9	9	22	8	129.42	31.9	10	21	10	0.867	0.898	0.887	1.251	1.223	1.253	0.91	0.829	0.869	1.40535	1.11845e-05	0.983409	0.590112	0.699759	0.000123372
CSA006701.1		2	2	8.4088						1.5338	11.8	1	2	1	2.0445	11.8	1	3	1		1.039	0.988		0.861	0.883		1.096	1.13	0.860385	0.0364279	1.09817	0.0832024	1.27638	0.00698523
CSA006702.1	nuclear pore complex protein GP210	3	3	48.981	6.7263	7.3	3	4	3	7.7698	8.9	4	4	4	6.3638	8.9	4	5	4	1	1.254	1.347	0.847	0.842	0.879	1.164	0.819	0.651	0.713135	0.0299372	0.731463	0.15328	1.0257	0.891525
CSA006703.1	stress-related ozone-induced family protein	3	3	9.0213	3.971	43.8	5	9	1	20.872	37.5	3	7	1	22.067	43.8	4	6	1	0.927	0.955	0.945	0.955	0.93	0.914	1.15	1.138	1.168	0.990096	0.554108	1.2225	6.22319e-05	1.23473	0.000120656
CSA006704.1	peptidyl serine alpha-galactosyltransferase	3	1	52.649	9.8854	11.4	5	5	5	2.1764	2.8	1	1	1	8.7989	7.1	3	3	3			1.206			0.884			0.841	0.733002		0.697347		0.951357
CSA006705.1	peptidyl serine alpha-galactosyltransferase	2	0	41.411	1.3581	2.2	1	1	1						1.8219	2.2	1	1	1
CSA006707.1		1	1	28.637						1.1089	3.2	1	1	1							1.451			0.959			0.421		0.660924		0.290145		0.438999
CSA006710.1	PAP fibrillin domain protein,expressed protein	3	3	25.838	35.729	6.9	2	3	2	29.463	6.9	2	3	2	32.784	6.4	1	2	1	0.426	0.405	0.469	0.928	0.904	0.96	1.872	1.926	1.778	2.14769	3.68284e-05	4.28923	7.14181e-06	1.99713	3.62042e-05
CSA006711.1	PAP fibrillin domain protein,expressed protein	3	3	17.078	15.83	17.1	2	3	2	24.551	11.6	1	1	1	20.169	17.1	2	3	2	0.44	0.444	0.441	1.02	1.026	1.033	1.754	1.742	1.737	2.32377	1.2421e-08	3.94943	1.50632e-09	1.69958	3.53058e-08
CSA006713.1	THO complex subunit 4A-like	1	1	16.835	1.9496	26	5	7	2											1.169			0.995			0.772			0.851155		0.660393		0.775879
CSA006714.1	THO complex subunit 4A-like	3	3	16.14	38.594	39.6	4	6	4	58.88	55.7	6	9	5	51.457	45.6	5	8	4	1.175	1.147	1.133	1.088	1.038	0.974	0.663	0.706	0.788	0.89725	0.0283249	0.624313	0.000363957	0.695806	0.00310934
CSA006715.1	glycerophosphodiester phosphodiesterase GDPD1, chloroplastic	2	2	42.626	5.5208	6	3	4	2	4.8297	6	3	3	2						0.538	0.435		0.409	0.35		2.278	2.484		0.780062	0.213193	4.89414	0.00367448	6.27404	0.00285325
CSA006730.1	stress-response A/B barrel domain-containing protein At5g22580	3	3	11.092	3.4697	9.4	1	2	1	2.3269	9.4	1	2	1	3.7149	9.4	1	2	1	1.697	1.535	1.816	0.654	0.792	0.625	0.408	0.484	0.276	0.410261	0.000501553	0.231379	0.000219449	0.563979	0.0194642
CSA006731.1	stress-response A/B barrel domain-containing protein At5g22580	3	3	8.4608	9.0005	38.2	3	4	3	9.173	35.5	3	5	3	12.027	38.2	2	3	2	2	1.794	1.809	0.477	0.576	0.568	0.18	0.359	0.346	0.289309	5.53318e-05	0.157951	5.72181e-05	0.545959	0.0203148
CSA006734.1	cysteine synthase	3	3	36.515	7.4202	10.3	3	3	3	8.1972	10.3	3	4	3	4.8062	7.7	2	2	2	0.895	0.963	0.881	1.095	1.079	1.038	1.043	0.966	1.124	1.17269	0.00664447	1.14385	0.0655503	0.975405	0.6172
CSA006738.1	phospholipid-transporting ATPase 3 isoform X2	2	0	102.99	2.1835	1.2	1	1	1	2.9149	1.2	1	1	1
CSA006746.1	2-alkenal reductase (NADP(+)-dependent)	3	3	15.941	164.57	48.6	5	12	5	173.45	26.7	3	9	3	99.943	48.6	5	11	5	0.416	0.449	0.425	0.927	0.967	1.036	1.814	1.793	1.761	2.27132	8.08299e-05	4.16124	1.96323e-07	1.83208	2.12557e-05
CSA006747.1	2-alkenal reductase (NADP(+)-dependent)-like	3	3	17.213	19.433	10.4	1	2	1	24.122	10.4	1	2	1	22.941	11.7	3	3	3	0.409	0.49	0.403	1.046	1.043	1.029	1.768	1.659	1.795	2.39478	2.92071e-05	4.01075	1.2893e-05	1.67479	7.46481e-05
CSA006749.1	NADP-dependent alkenal double bond reductase P2-like	3	3	15.249	17.414	13.5	1	1	1	24.118	13.5	1	1	1	1.9848	13.5	1	1	1	0.6	0.564	0.558	1.176	1.298	1.298	1.365	1.282	1.29	2.19048	8.93881e-05	2.2863	1.51477e-05	1.04374	0.320168
CSA006763.1	root phototropism protein 2-like	1	0	63.42											3.6705	2.5	1	1	1
CSA006765.1	peptidyl-prolyl cis-trans isomerase CYP40	3	3	38.92	11.881	16.1	5	5	4	15.818	17.5	7	9	5	17.847	18.4	6	7	5	1.143	0.98	1.274	0.907	1.008	0.878	0.903	1.019	0.697	0.822196	0.0981795	0.770974	0.110436	0.937701	0.600244
CSA006767.1	peroxidase 10	3	3	35.431	2.484	2.8	1	3	1	2.7759	2.8	1	2	1	2.003	2.8	1	2	1	1.237	1.242	1.218	1.136	1.16	1.09	0.513	0.491	0.602	0.915878	0.00893508	0.434406	3.63051e-05	0.474306	0.000116334
CSA006770.1	cellulose synthase A catalytic subunit 3	1	1	124.3											28.521	9.9	9	10	6			1.286			0.896			0.716	0.696734		0.556765		0.799107
CSA006773.1	eukaryotic translation initiation factor 3 subunit M	3	3	46.609	168.12	50.2	16	28	15	184.22	54.4	17	32	16	118.23	49.5	17	24	16	1.179	1.209	1.19	0.955	0.968	0.961	0.784	0.741	0.782	0.806037	1.71127e-05	0.644774	1.37512e-05	0.799931	0.000187031
CSA006775.1	ABC transporter B family member 27-like	3	3	74.523	47.82	12.1	8	10	8	34.042	12	7	10	7	50.782	13	8	9	8	1.22	1.15	1.159	1.047	1.036	1.017	0.652	0.821	0.755	0.878436	0.00378527	0.63134	0.00129238	0.71871	0.00434181
CSA006778.1	WD-40 repeat-containing protein MSI4	1	1	10.703	19.349	18.9	1	2	1											1.371			0.853			0.645			0.622174		0.47046		0.756155
CSA006779.1	WD-40 repeat-containing protein MSI4-like	3	3	13.863	45.59	16.1	1	2	1	53.541	16.1	1	2	1	49.398	39.5	2	3	2	1.327	1.386	1.393	0.864	0.84	0.819	0.694	0.639	0.652	0.614467	2.81166e-05	0.483439	1.21118e-05	0.786762	0.0010475
CSA006780.1	WD-40 repeat-containing protein MSI4-like	2	2	18.309	5.5643	20	3	3	3						6.9062	14.3	2	2	2	1.495		1.342	0.77		0.87	0.563		0.667	0.578075	0.0225321	0.433557	0.0129952	0.75	0.104735
CSA006781.1	WD-40 repeat-containing protein MSI4-like	3	3	7.7267	68.945	41.4	2	2	2	76.074	31.4	1	1	1	64.798	31.4	1	2	1	1.216	1.188	0.991	0.84	0.955	0.98	0.874	0.789	1.034	0.817378	0.0672451	0.794404	0.0822952	0.971892	0.771765
CSA006784.1	CRM-domain containing factor CFM3, chloroplastic/mitochondrial isoform X1	1	0	94.032											2.6703	1.4	1	1	1
CSA006786.1	RasGAP-activating-like protein 1	2	2	115.71	1.5781	1.2	1	1	1						1.9056	1.9	2	2	2	1.2		1.229	0.899		0.96	0.831		0.726	0.765336	0.0137523	0.641005	0.0152492	0.837547	0.130718
CSA006787.1	synaptotagmin-5 isoform X1	2	1	44.831						1.2642	3	1	1	1	2.1624	3	1	1	1			0.987			1.095			0.916	1.10942		0.928065		0.83653
CSA006792.1	WD repeat-containing protein 74	3	0	46.423	2.8332	3.1	1	1	1	4.8268	5.6	2	2	2	1.8825	3.1	1	1	1
CSA006793.1	probable aspartyl aminopeptidase	3	3	53.5	145.5	45.5	17	26	16	141.12	37.6	15	27	13	155.5	42	17	28	15	1.124	1.084	1.014	0.939	0.924	0.922	0.895	0.945	1.072	0.86437	0.0110775	0.903786	0.169373	1.0456	0.468826
CSA006794.1	adenylate kinase 4	3	3	20.331	94.383	60	12	19	6	124.01	60	12	24	6	121.2	56.2	11	17	6	1.017	1.008	0.957	1.039	1.009	1.051	0.967	0.959	0.999	1.03924	0.157669	0.980885	0.442652	0.943853	0.0293989
CSA006795.1	adenylate kinase 4	2	0	8.1906	3.7488	23.3	1	1	1	3.6	23.3	1	1	1
CSA006796.1	nucleolar protein 56	3	3	63.295	35.793	18.3	9	10	9	25.034	23.4	12	13	12	17.795	14.7	8	9	8	0.97	0.929	0.979	1.253	1.251	1.221	0.769	0.778	0.718	1.2943	0.00010853	0.787005	0.00107818	0.608054	2.1969e-05
CSA006799.1	protein ACCUMULATION AND REPLICATION OF CHLOROPLASTS 6, chloroplastic	3	3	78.316	24.948	15.6	9	12	9	83.626	21.5	13	15	13	31.202	16.6	9	9	9	0.909	0.909	0.941	1.09	1.057	1.085	1.028	1.059	0.991	1.17144	0.000440403	1.11562	0.00893901	0.952351	0.0816003
CSA006802.1	15 kDa selenoprotein-like isoform X2	3	3	17.953	40.09	53.2	7	9	7	78.427	53.2	7	8	7	49.868	59.5	8	11	8	1.114	1.09	1.084	1.053	1.084	1.081	0.775	0.81	0.794	0.97871	0.15827	0.72354	2.43842e-05	0.739279	3.84878e-05
CSA006803.1	plasma protein	2	2	65.39	3.9524	1.7	1	2	1						4.434	1.7	1	1	1	1.152		1.158	1.061		1.173	0.725		0.595	0.9671	0.567903	0.571429	0.0168445	0.590868	0.0334853
CSA006817.1	GTPase HflX isoform X1	1	0	35.231						1.6005	2.2	1	1	1
CSA006818.1	pentatricopeptide repeat-containing protein At1g60770 isoform X1	3	3	54.11	8.8657	7.6	3	3	3	6.6227	7	3	3	3	6.1737	4.7	2	2	2	1.211	1.26	1.389	1.025	0.996	1.034	0.682	0.645	0.425	0.791451	0.00781238	0.453886	0.00186753	0.573486	0.00584558
CSA006820.1	transmembrane protein, putative	2	2	87.453						1.1112	1.2	1	1	1	1.4203	1.3	1	1	1		1.021	0.798		0.973	1.554		1	0.682	1.38922	0.373192	0.924684	0.757995	0.665611	0.330165
CSA006824.1	transmembrane protein	3	3	9.719	3.9102	35.3	2	2	2	105.24	35.3	3	4	3	56.124	35.3	3	4	3	0.668	0.575	0.617	0.811	0.866	0.857	1.664	1.733	1.711	1.36237	0.00212482	2.74624	5.61015e-06	2.01579	5.45578e-06
CSA006837.1	peptidyl-prolyl cis-trans isomerase	3	3	36.4	1.5621	2.7	1	1	1	18.429	11.7	2	2	2	3.858	5.4	1	1	1	1.116	0.979	1.258	0.99	1.104	0.922	0.851	0.918	0.726	0.899493	0.308963	0.74411	0.0436359	0.827255	0.08814
CSA006839.1	CLIP-associated protein-like	2	0	50.578	2.2671	2	1	2	1	1.2485	2	1	1	1
CSA006841.1	adenine phosphoribosyltransferase 5 isoform X2	3	3	12.633	7.8372	16.2	1	1	1	12.705	16.2	1	1	1	9.263	16.2	1	1	1	0.925	0.961	0.959	0.92	0.915	0.917	1.19	1.146	1.146	0.967311	0.0579673	1.2239	0.000346594	1.26526	7.88144e-05
CSA006842.1	structural maintenance of chromosomes protein 2-like isoform X1	2	0	93.534						2.2901	1.6	1	1	1	2.0079	2.5	2	2	2
CSA006849.1	dolichyl-diphosphooligosaccharide--protein glycosyltransferase 48 kDa subunit	3	3	25.939	1.827	4.9	1	1	1	5.8336	4.9	1	2	1	9.1084	4.9	1	2	1	1.229	1.079	1.122	1.093	1.087	1.069	0.582	0.797	0.756	0.94723	0.252627	0.622449	0.00559977	0.657125	0.00498904
CSA006850.1	dolichyl-diphosphooligosaccharide--protein glycosyltransferase 48 kDa subunit isoform X2	3	3	27.521	11.662	7.1	2	5	2	10.195	7.1	2	5	2	13.335	4.3	1	4	1	1.141	0.951	0.868	1.025	1.011	1.064	0.845	1.056	1.03	1.0473	0.601179	0.990203	0.930811	0.945484	0.455784
CSA006856.1	transcription factor bHLH68	1	0	38.783						1.5142	4.2	1	1	1
CSA006864.1	putative serine carboxypeptidase-like 23 isoform X1	1	1	48.327						5.0232	5.1	2	2	2							1.283			0.831			0.791		0.647701		0.616524		0.951865
CSA006866.1	polyadenylate-binding protein RBP47	3	3	46.198	17.674	9.2	4	5	3	17.829	11.4	5	7	3	14.498	11.4	5	7	3	1.402	1.426	1.423	0.769	0.732	0.744	0.693	0.7	0.691	0.528111	9.24918e-07	0.490238	9.14564e-08	0.928285	0.00879615
CSA006867.1	GRIP and coiled-coil domain-containing protein 2	3	2	95.985	9.3956	3.9	3	3	3	3.4036	1.5	1	1	1	11.433	3.8	3	3	3	1.228		1.162	0.904		0.945	0.788		0.775	0.77364	0.0200095	0.653975	0.00655124	0.845322	0.0218778
CSA006880.1	copper ion-binding protein	3	3	12.664	2.8429	12.8	2	4	2	2.4613	12.8	2	4	2	3.1102	12.8	2	5	2	0.959	0.876	0.891	1.073	1.07	1.157	0.934	1.111	0.993	1.21056	0.00749743	1.11445	0.147214	0.920606	0.215021
CSA006881.1	lysine--tRNA ligase, cytoplasmic isoform X2	2	1	73.266						3.0516	7.9	5	10	2	1.8456	7.9	5	10	1		1.008			1.003			0.987		0.99504		0.979167		0.984048
CSA006897.1	calmodulin-binding protein 60 E	1	0	67.184											1.8549	1.7	1	1	1
CSA006900.1	cinnamoyl-CoA reductase 1 isoform X2	2	2	30.689	4.4379	10.7	3	5	1						6.2678	10.7	3	3	1	1.259		1.186	0.758		0.826	0.902		0.931	0.647853	0.0131616	0.749693	0.0160772	1.1572	0.0779738
CSA006901.1	deoxyribodipyrimidine photo-lyase	3	3	61.133	44.818	13.3	6	9	6	62.595	13.2	6	6	6	33.679	13	5	6	5	1.204	1.167	1.248	1.004	0.974	0.956	0.723	0.832	0.705	0.810721	0.00111408	0.624482	0.000599757	0.770279	0.00592543
CSA006904.1	SNARE-interacting protein KEULE-like isoform X1	3	3	74.784	4.5229	4.6	3	4	2	10.719	6.2	4	5	3	15.886	5.2	3	4	3	1.087	1.094	1.101	1.134	1.081	1.132	0.736	0.771	0.719	1.0198	0.290595	0.678245	2.42292e-05	0.665073	8.59184e-05
CSA006908.1	UDP-glucuronic acid decarboxylase 2	3	2	21.205	1.4928	40.4	8	14	1	4.7097	44.1	9	12	2	1.8891	31.4	6	12	1		1.137	1.223		1.005	0.946		0.805	0.75	0.826695	0.0592977	0.658898	0.0157034	0.797027	0.0390727
CSA006911.1	60S ribosomal protein L32-1-like	3	3	15.662	29.97	48.1	7	15	7	42.779	48.1	7	14	7	31.03	48.1	7	14	7	1.725	1.654	1.59	0.615	0.607	0.77	0.388	0.345	0.473	0.400885	0.000112915	0.242705	2.06144e-05	0.605422	0.0157463
CSA006913.1	DNA-directed RNA polymerase beta subunit (chloroplast)	3	0	9.4889	4.4161	16.9	1	1	1	7.0669	16.9	1	1	1	3.6892	16.9	1	1	1
CSA006922.1	photosystem II CP43 reaction center protein-like	3	3	13.296	110.05	59.3	6	21	6	120.98	59.3	7	26	7	131.78	59.3	7	25	7	0.59	0.652	0.677	0.814	0.817	0.822	1.78	1.604	1.666	1.27827	0.00237054	2.63158	5.47971e-05	2.0587	7.39458e-05
CSA006923.1	photosystem II protein D2 (chloroplast)	3	3	33.679	5.8562	9	3	19	1	4.0584	13.4	4	17	1	9.9483	9	3	16	1	0.58	0.597	0.782	0.811	0.915	0.901	1.786	1.65	1.409	1.34099	0.0371396	2.4732	0.00166809	1.84431	0.00300472
CSA006930.1	DNA-directed RNA polymerase beta chain (chloroplast)	3	3	81.353	12.79	6	4	4	4	21.356	11	7	8	7	20.451	7.1	5	5	5	0.816	0.762	0.755	1.291	1.366	1.36	0.878	0.883	0.89	1.72182	5.35104e-05	1.13631	0.00564536	0.659945	4.78588e-05
CSA006931.1	RNA polymerase beta (chloroplast)	3	0	45.687	1.3407	2.8	1	1	1	1.8569	4.8	2	2	2	1.8694	2.8	1	1	1
CSA006932.1	RNA polymerase beta subunit (chloroplast)	3	0	20.329	3.5748	10.7	2	2	2	1.6843	4.5	1	1	1	2.2453	4.5	1	1	1
CSA006934.1	photosystem II 44 kDa protein (chloroplast)	3	3	11.1	34.04	15.7	1	6	1	40.203	15.7	1	6	1	35.05	15.7	1	6	1	0.618	0.564	0.472	0.682	0.713	0.636	1.873	1.903	2.037	1.22793	0.0593684	3.51451	3.03922e-05	2.86214	2.17059e-05
CSA006935.1	RNA polymerase beta' subunit (chloroplast)	1	0	11.025						1.1918	10.3	1	1	1
CSA006940.1	protein rolling stone-like, partial	3	3	38.344	9.0017	8.8	4	4	4	5.8533	10	4	5	4	9.6239	11.8	5	6	5	0.95	1.112	1.19	1.136	1.055	1.059	0.935	0.796	0.674	0.999385	0.993372	0.739545	0.0523417	0.74	0.0243078
CSA006950.1	flavonol synthase/flavanone 3-hydroxylase	3	3	38.357	169.51	48.5	11	14	11	82.328	39.6	10	16	10	82.91	34.5	8	12	8	1.159	1.198	1.221	1.135	1.172	1.183	0.597	0.544	0.491	0.975405	0.274746	0.456121	5.30591e-05	0.467622	5.26084e-05
CSA006958.1		1	1	33.069						1.9728	3.4	1	1	1							1.084			0.766			1.137		0.706642		1.04889		1.48433
CSA006961.1	microtubule-associated protein RP/EB family member 1C	3	3	36.258	3.5031	3.7	1	2	1	4.5966	3.7	1	2	1	4.2555	3.7	1	1	1	1.605	1.656	1.65	0.523	0.596	0.506	0.677	0.529	0.634	0.33089	4.32167e-06	0.374669	2.58712e-05	1.13231	0.239502
CSA006964.1	pre-mRNA-processing factor 17-like isoform X2	3	3	69.006	28.78	10.4	5	6	5	34.975	16.8	8	9	8	15.954	11.2	6	6	6	1.229	1.185	1.258	0.975	0.963	0.957	0.718	0.78	0.702	0.788399	0.000291102	0.599129	0.000103936	0.759931	0.000683239
CSA006967.1	ubiquitin domain-containing protein 1-like	3	2	11.947	1.7531	6.7	1	1	1	1.2028	6.7	1	1	1	1.8895	6.7	1	1	1		1.004	0.978		0.911	1.098		1.09	0.925	1.01362	0.89939	1.01665	0.861646	1.00299	0.98299
CSA006970.1	probable solanesyl-diphosphate synthase 3, chloroplastic isoform X2	3	2	46.196	12.364	7.4	3	4	2	34.98	13.3	4	5	3	14.424	10.5	4	5	3	0.822	0.838		1.052	1.01		1.19	1.198		1.24217	0.0122701	1.43855	0.000603246	1.1581	0.0167691
CSA006976.1	probable prolyl 4-hydroxylase 7	3	3	39.562	11.376	16.7	5	6	5	17.441	13.9	5	7	5	25.895	21	6	8	6	1.168	1.131	1.16	0.959	0.971	0.909	0.843	0.863	0.84	0.820757	0.000723491	0.736051	2.19888e-05	0.896795	0.00859501
CSA006978.1	afadin- and alpha-actinin-binding protein isoform X2	3	3	31.665	6.2432	4.4	1	1	1	38.487	8	2	2	2	15.827	8	2	3	2	1.553	1.728	1.572	0.779	0.655	0.783	0.472	0.365	0.443	0.456831	0.000226149	0.263754	4.90384e-05	0.577357	0.00408507
CSA006979.1	afadin- and alpha-actinin-binding protein isoform X1	3	3	17.768	3.3362	7.5	1	1	1	4.0441	14.9	2	2	2	5.1546	15.5	2	2	2	1.266	1.232	1.259	0.8	0.932	0.824	0.847	0.753	0.831	0.68033	0.000670151	0.647059	0.00013755	0.951095	0.450779
CSA006984.1	divinyl chlorophyllide a 8-vinyl-reductase, chloroplastic	3	3	46.257	15.115	6.7	2	2	2	26.541	5.3	2	2	2	31.197	5.3	2	2	2	0.816	0.834	0.846	1.071	1.043	1.03	1.178	1.183	1.18	1.25962	0.00013203	1.41867	2.47591e-06	1.12627	0.000407802
CSA006993.1	mitochondrial import receptor subunit TOM7-1-like	3	2	7.8603	2.8781	11.1	1	1	1	2.6923	11.1	1	1	1	3.6599	11.1	1	1	1	1.47	1.444		0.764	0.767		0.603	0.637		0.525395	0.000357942	0.425532	0.000653114	0.809928	0.01348
CSA006998.1	eukaryotic translation initiation factor 5B	3	3	151.85	17.725	5.1	6	6	6	9.2342	4.5	6	6	6	22.497	4.5	5	5	5	0.923	1.026	1.079	1.109	1.112	1.163	0.991	0.844	0.714	1.11757	0.0727604	0.84181	0.158335	0.753251	0.0273258
CSA007001.1	transcription factor VIP1-like	3	2	22.678	3.7662	10.4	2	3	1	3.7592	10.4	2	3	1	6.5712	10.4	2	2	1		1.001	1.031		0.919	0.862		1.086	1.106	0.876476	0.059991	1.07874	0.0472139	1.23077	0.0209261
CSA007006.1	protein RER1A	3	3	23.633	13.444	8.8	2	2	2	4.5316	13.2	2	2	2	4.7527	8.3	1	1	1	1.194	1.028	1.144	0.872	0.866	0.827	0.869	1.106	0.987	0.762032	0.00642778	0.879976	0.185195	1.15478	0.131085
CSA007007.1	inorganic phosphate transporter 2-1, chloroplastic	2	2	61.103						1.3643	2.1	1	1	1	2.3794	3.5	2	2	2		0.709	0.73		1.039	1.111		1.36	1.254	1.49409	0.0109448	1.81654	0.00835195	1.21581	0.0685209
CSA007008.1	60S ribosomal protein L27a-3-like	3	3	16.304	35.496	46.6	6	10	4	24.292	39.7	5	10	3	30.937	54.8	7	10	4	1.604	1.349	1.384	0.667	0.773	0.723	0.492	0.674	0.605	0.498732	0.00106121	0.408347	0.000871233	0.81877	0.0998292
CSA007009.1	altered inheritance of mitochondria protein 32-like	2	0	35.806						1.1327	4.4	2	2	2	7.3903	7.5	2	2	2
CSA007022.1	DNA mismatch repair protein MSH2	3	3	83.127	15.541	1.9	1	2	1	19.442	1.9	1	1	1	7.0485	1.9	1	2	1	1.267	1.671	1.226	0.784	0.585	0.833	0.863	0.52	0.867	0.528818	0.0153138	0.540346	0.025087	1.0218	0.913133
CSA007023.1	DNA mismatch repair protein MSH2	2	1	14.524	2.0088	14.1	1	1	1	12.064	14.1	1	1	1							1.221			0.865			0.839		0.708436		0.687142		0.969942
CSA007029.1	receptor homology region, transmembrane domain- and RING domain-containing protein 2	1	1	50.519											1.7258	1.7	1	1	1			0.887			1.26			0.876	1.42052		0.987599		0.695238
CSA007030.1	putative CCA tRNA nucleotidyltransferase 2	2	0	29.722	5.4982	9.2	2	3	2						2.3707	3.4	1	1	1
CSA007032.1	putative CCA tRNA nucleotidyltransferase 2	3	1	39.841	4.1573	5.5	2	2	2	1.1311	2.9	1	1	1	3.2815	5.5	2	2	2	1.034			0.983			0.972			0.950677		0.940039		0.98881
CSA007039.1	protein MON2 homolog isoform X1	3	3	130	13.381	4.7	5	5	5	9.6549	6.1	6	6	6	15.887	5.4	6	6	6	1.174	0.964	0.882	0.96	1.027	1.083	0.802	1.02	1.074	1.01656	0.867801	0.95894	0.748465	0.943322	0.556157
CSA007040.1	protein MON2 homolog isoform X2	3	2	40.486	10.587	8	2	2	2	1.2424	5.8	2	2	2	4.8879	4.4	1	1	1	1.122		0.984	1.08		1.161	0.745		0.848	1.0641	0.487676	0.75641	0.0966224	0.710843	0.0385418
CSA007052.1	NADH dehydrogenase	3	3	19.597	65.687	42.6	5	9	5	166.11	46.7	6	8	6	82.204	42.6	5	8	5	1.001	0.967	1.032	1.043	0.999	0.979	0.975	1.135	0.98	1.007	0.805709	1.03	0.619184	1.02284	0.701426
CSA007053.1	phenylalanine--tRNA ligase alpha subunit, cytoplasmic isoform X2	1	1	24.321	42.908	26.9	6	10	6											1.187			0.96			0.769			0.808762		0.647852		0.801042
CSA007054.1	phenylalanine--tRNA ligase alpha subunit, cytoplasmic-like	2	2	22.696						47.405	25	5	8	5	124.28	25	5	9	5		1.238	1.22		0.945	0.919		0.726	0.776	0.75834	0.00282219	0.611066	0.00307568	0.805794	0.0233892
CSA007055.1	phenylalanine--tRNA ligase alpha subunit, cytoplasmic	3	3	9.4437	4.8407	26.2	2	3	2	3.7605	26.2	2	3	2	4.6187	26.2	2	3	2	1.353	1.174	1.238	0.888	1.011	0.962	0.633	0.747	0.712	0.759894	0.00895528	0.555644	0.000860675	0.731213	0.00644408
CSA007056.1	phenylalanine--tRNA ligase alpha subunit, cytoplasmic	3	3	18.369	11.109	28.4	5	7	5	4.1487	16.1	3	5	3	7.5329	16.1	3	6	3	0.923	0.809	1.247	0.9	1.028	0.95	1.293	1.234	0.742	0.966096	0.817167	1.09735	0.680993	1.13586	0.505963
CSA007057.1	phenylalanine--tRNA ligase alpha subunit, cytoplasmic	3	3	11.691	24.885	31.4	2	3	2	18.132	31.4	2	4	2	8.9216	31.4	2	2	2	1.156	1.09	1.278	1.003	1.074	0.954	0.712	0.795	0.665	0.860102	0.0652192	0.616345	0.00253158	0.716595	0.00514309
CSA007058.1	bifunctional 3-dehydroquinate dehydratase/shikimate dehydrogenase, chloroplastic-like isoform X1	1	1	22.123	24.195	8.6	1	1	1											0.996			1.327			0.653			1.33233		0.655622		0.492087
CSA007060.1	DEAD-box ATP-dependent RNA helicase 53	3	3	54.565	39.476	20.9	9	9	9	75.049	32.9	13	14	13	64.038	31	13	16	13	1.255	1.258	1.285	0.861	0.928	0.853	0.764	0.771	0.741	0.695629	0.000113896	0.599263	2.70198e-06	0.861469	0.0086845
CSA007072.1	zinc finger family protein	3	3	45.75	32.807	18	6	8	6	26.258	19.5	7	8	7	35.357	17.5	6	8	6	1.033	1.044	1.084	0.961	1.075	1.049	0.929	0.87	0.822	0.975957	0.539581	0.829168	0.00650965	0.849595	0.0288953
CSA007075.1	ABC transporter I family member 11, chloroplastic	3	3	28.628	3.3289	4.7	1	1	1	5.0472	17.8	3	3	3	12.336	11.9	2	2	2	0.856	0.866	0.833	1.009	1.056	0.947	1.19	1.125	1.288	1.17886	0.00995351	1.41018	0.00194972	1.19622	0.0258041
CSA007078.1	coenzyme Q-binding protein COQ10 homolog, mitochondrial	3	3	28.178	2.4754	3.2	1	1	1	2.573	3.2	1	1	1	2.6157	3.2	1	1	1	0.942	0.885	0.797	1.062	1.125	1.087	1.014	1.025	1.188	1.24771	0.00922516	1.2298	0.0459874	0.985644	0.804244
CSA007084.1	thiosulfate sulfurtransferase 16, chloroplastic-like isoform X1	3	3	18.537	3.6597	6.7	1	2	1	2.6942	6.7	1	2	1	3.7556	6.7	1	2	1	0.552	0.774	0.645	1.069	1.125	1.251	1.547	1.177	1.22	1.74784	0.0042431	2.00101	0.0078697	1.14485	0.265594
CSA007085.1	putative S-adenosyl-L-methionine-dependent methyltransferase Mjls_1072	3	3	37.649	46.555	26.8	6	9	6	26.711	21.4	5	6	5	42.279	21.4	5	8	5	0.888	0.832	0.997	1.079	0.968	1.065	0.999	1.305	0.93	1.14538	0.0921147	1.19028	0.240089	1.0392	0.752531
CSA007086.1	plasma membrane fusion protein	2	2	10.525	6.6402	22.1	1	1	1	13.699	22.1	1	1	1						0.652	0.67		0.894	0.879		1.597	1.587		1.34115	0.00268822	2.40847	0.000122272	1.79583	0.000163201
CSA007089.1	photosystem II reaction center W protein, chloroplastic-like	1	1	14.291	1.9183	8.8	1	1	1											0.579			1.421			1.129			2.45423		1.94991		0.794511
CSA007095.1	protein trichome birefringence-like 39	1	1	28.326	7.2491	4.1	1	1	1											0.674			1.844			0.54			2.73591		0.801187		0.292842
CSA007114.1	flowering time control protein FCA isoform X1	3	3	69.083	39.957	4.5	2	3	2	7.3826	6.5	4	4	4	28.479	4.5	2	2	2	1.16	1.025	1.105	0.947	0.987	0.961	0.784	0.98	0.897	0.879939	0.0323228	0.808815	0.0384705	0.919171	0.249853
CSA007116.1	GPN-loop GTPase 1-like isoform X2	3	2	53.584	4.6145	4.4	2	2	2	2.5047	4.6	2	3	2	3.7117	4.4	2	2	2	1.578		1.165	0.688		0.897	0.536		0.884	0.577834	0.129462	0.517681	0.133957	0.895899	0.723768
CSA007117.1	carbamoyl-phosphate synthase small chain, chloroplastic isoform X2	3	3	11.054	14.578	11.4	1	2	1	29.577	11.4	1	1	1	26.314	11.4	1	3	1	1.042	1.029	1.095	0.977	0.975	0.937	0.966	0.987	0.937	0.912508	0.0183867	0.912824	0.0207969	1.00035	0.987167
CSA007118.1	carbamoyl-phosphate synthase small chain, chloroplastic isoform X2	3	3	46.549	81.711	25.8	9	18	9	168.63	35.8	13	22	13	93.678	28.4	10	17	10	1.084	1.034	1.037	0.987	0.98	0.998	0.898	0.949	0.931	0.939778	0.0204404	0.880507	0.00466514	0.936931	0.0169768
CSA007122.1	coatomer subunit delta-like isoform X1	3	3	30.624	24.247	28.5	7	13	4	16.715	19.3	5	10	3	26.632	25.9	6	11	4	1.302	1.365	1.275	0.975	0.931	1.005	0.625	0.504	0.569	0.738458	0.000554392	0.430746	7.00196e-05	0.583305	0.000595227
CSA007123.1	coatomer subunit delta	3	2	15.58	1.709	18.4	2	2	1	22.59	18.4	2	2	1	22.09	29.9	3	3	2		1.234	1.166		0.98	0.958		0.697	0.816	0.8075	0.0231052	0.630417	0.0230537	0.780702	0.0723862
CSA007124.1	coatomer subunit delta	3	3	25.682	4.6312	16.6	3	3	1	12.747	21.4	4	6	2	11.056	21.4	4	6	2	1.046	1.274	1.205	0.833	0.89	0.969	1.116	0.74	0.749	0.763688	0.0237616	0.739007	0.0953836	0.967682	0.834386
CSA007125.1	selenoprotein H	3	3	29.451	3.4508	6	2	3	2	3.4239	6	2	2	2	4.9687	6	2	4	2	1.332	1.356	1.42	0.863	0.886	0.85	0.687	0.631	0.58	0.632668	5.88242e-05	0.462025	5.40058e-05	0.730281	0.00201569
CSA007133.1	anthranilate synthase alpha subunit 1, chloroplastic	3	3	70.185	17.407	18.2	10	11	6	19.198	18.6	10	12	6	23.993	16.3	9	13	5	1.608	1.161	1.198	0.896	0.877	0.947	0.27	0.824	0.783	0.685657	0.0453935	0.473154	0.0381442	0.690074	0.192427
CSA007137.1	mitochondrial phosphate carrier protein 3, mitochondrial	3	3	40.241	83.33	44.1	15	28	5	130.69	42	14	28	4	115.02	36.9	13	30	4	1.008	1.049	1.013	1.013	1.052	1.035	0.944	0.875	0.945	1.00977	0.591185	0.900326	0.0183733	0.891613	0.012198
CSA007140.1	magnesium transporter MRS2-I-like isoform X1	3	1	45.96	3.3662	2.5	1	1	1	2.8858	2.5	1	1	1	2.05	2.5	1	1	1	0.763			1.28			1.026			1.67759		1.34469		0.801562
CSA007144.1	putative dihydroflavonol-4-reductase isoform X1	2	0	27.326	1.5135	4.9	1	1	1						6.0185	10.5	2	2	2
CSA007150.1	J protein JJJ1-like	3	3	31.6	2.8263	4	1	1	1	6.397	4	1	1	1	4.3529	4	1	1	1	0.741	0.668	0.781	1.251	1.37	0.963	1.088	1.061	1.343	1.63653	0.0206646	1.59452	0.0105507	0.97433	0.848544
CSA007151.1	polyribonucleotide nucleotidyltransferase 2, mitochondrial	3	2	111.55	29.038	8.7	7	9	3	44.37	10.9	9	13	4	3.832	7.2	6	8	3		1.086	1.06		1.045	0.989		0.832	0.929	0.94781	0.211346	0.820596	0.0617985	0.865782	0.135049
CSA007159.1	catalase isozyme 1	3	3	39.623	78.08	37.8	11	36	1	51.596	32.3	9	29	1	36.231	39.9	12	39	1	0.857	0.845	0.876	0.912	0.942	0.951	1.286	1.277	1.224	1.08805	0.00700063	1.46897	4.63378e-05	1.35009	0.000133313
CSA007162.1	nuclear pore complex protein NUP1-like	1	1	11.986											2.0565	13.5	1	1	1			0.972			0.758			1.3	0.779835		1.33745		1.71504
CSA007166.1	lipase-related family protein	1	0	36.191	1.9379	2.7	1	1	1
CSA007168.1	E3 ubiquitin-protein ligase BRE1-like 1	3	0	121.83	2.2809	1.7	2	2	2	3.8643	1.7	2	2	2	4.5183	0.9	1	1	1
CSA007170.1	protein argonaute 1	3	3	128.59	146.4	32.5	32	45	27	197.18	32.7	32	47	32	159.27	29.2	30	42	30	1.186	1.169	1.172	1.03	1.046	0.995	0.709	0.72	0.741	0.870712	0.000676081	0.615254	1.90662e-06	0.70661	7.14515e-05
CSA007171.1	dolichyl-diphosphooligosaccharide--protein glycosyltransferase subunit STT3B	3	3	83.313	69.576	13.2	9	13	9	37.798	11.6	8	13	8	92.292	11.3	8	13	8	1.083	1.127	1.118	1.06	0.992	1.062	0.821	0.81	0.737	0.935697	0.0553354	0.711538	0.000414111	0.760437	0.0020705
CSA007173.1	E3 ubiquitin-protein ligase RING1-like	3	3	40.027	28.266	13.1	4	4	4	12.731	7.9	2	2	2	17.576	14.2	4	4	4	1.048	1.123	0.963	1.113	1.082	1.094	0.888	0.741	0.95	1.04946	0.334182	0.82291	0.0749271	0.784129	0.0194535
CSA007177.1	callose synthase 10-like	1	0	28.185											2.8241	27	5	7	1
CSA007180.1	ubiquitin domain-containing protein 1-like	2	2	12.656	2.5127	11.4	1	1	1						1.7337	11.4	1	1	1	0.834		0.844	1.046		1.026	1.18		1.187	1.2348	0.00320542	1.41061	0.000313721	1.14237	0.00511985
CSA007190.1	zinc finger CCHC domain-containing protein 8 isoform X2	3	3	62.653	4.127	3.1	2	2	2	6.3637	3.1	2	2	2	4.927	1.8	1	1	1	1.352	1.323	1.26	0.91	0.941	0.938	0.61	0.616	0.708	0.708767	0.000189134	0.491487	8.97621e-05	0.693439	0.00101336
CSA007191.1	zinc finger CCHC domain-containing protein 8 isoform X2	3	3	16.817	6.0886	19.5	2	2	2	6.1307	19.5	2	2	2	2.4712	7.1	1	2	1	1.108	1.172	1.141	1.062	1.031	1.009	0.783	0.728	0.795	0.906752	0.0114776	0.674072	0.000178277	0.743391	0.000498507
CSA007193.1	dCTP pyrophosphatase 1	3	3	17.422	51.393	23.4	4	4	4	80.409	31.2	6	9	6	94.828	40.3	6	6	6	1.513	1.743	1.498	0.716	0.643	0.761	0.597	0.368	0.57	0.44594	0.000528526	0.322886	0.000561399	0.724057	0.071443
CSA007195.1	splicing factor U2af small subunit B-like	3	2	42.142	1.8411	5.5	2	3	1	1.4181	1.9	1	2	1	6.4134	6.4	2	5	2		1.894	1.859		0.496	0.426		0.308	0.432	0.24567	0.000763359	0.197176	0.00182367	0.802603	0.329485
CSA007196.1	histone deacetylase HDT1-like	1	1	14.062											4.2266	9.9	1	1	1			1.104			0.961			0.898	0.870471		0.813406		0.934443
CSA007200.1	proline--tRNA ligase isoform X1	3	3	22.618	22.861	33	6	7	6	24.32	30	5	7	5	19.237	37.4	7	9	7	0.752	0.734	0.817	1.07	1.083	1.084	1.194	1.202	1.083	1.40556	0.000262678	1.51064	0.00103494	1.07476	0.105281
CSA007201.1	proline--tRNA ligase, chloroplastic/mitochondrial-like	3	3	40.668	77.514	29.9	8	11	8	106.99	39.3	10	13	10	121.75	33.8	8	10	8	0.804	0.78	0.829	1.125	1.147	1.065	1.145	1.082	1.118	1.38293	0.000404282	1.38624	0.000176515	1.0024	0.934642
CSA007207.1	photosystem II 22 kDa protein, chloroplastic	3	3	12.387	43.929	20.7	2	5	1	50.592	20.7	2	4	1	45.836	13.8	1	3	1	0.515	0.43	0.423	0.948	0.963	0.935	1.729	1.829	1.867	2.08041	8.7672e-05	3.96564	1.17217e-05	1.90618	3.34666e-05
CSA007208.1	photosystem II 22 kDa protein, chloroplastic	3	3	10.14	3.5221	18.1	2	8	1	3.0591	18.1	2	5	1	3.7474	18.1	2	7	1	0.573	0.48	0.577	0.936	0.988	0.953	1.654	1.732	1.611	1.76503	0.00029407	3.06564	1.90557e-05	1.73688	5.22609e-05
CSA007210.1	protein EARLY RESPONSIVE TO DEHYDRATION 15-like	3	3	18.655	3.8608	14.6	2	3	2	5.5948	19	3	4	3	4.2442	10.1	2	3	2	1.121	1.078	1.09	1.075	1.075	1.064	0.752	0.811	0.806	0.977197	0.133872	0.72028	0.000177463	0.737088	0.00012669
CSA007214.1	serine/threonine-protein phosphatase PP2A catalytic subunit	3	3	35.819	200.08	47	9	18	7	235.06	50.2	11	20	3	166.44	35.1	7	16	6	1.104	1.074	1.072	0.985	0.918	0.96	0.861	0.956	0.909	0.880923	0.00430669	0.838769	0.00398183	0.952148	0.246605
CSA007219.1	nuclear cap-binding protein subunit 2-like	3	3	21.491	2.4323	6	1	2	1	5.9056	12	2	5	2	4.6049	12	2	6	2	1.8	1.859	1.884	0.571	0.53	0.491	0.355	0.348	0.326	0.287209	2.64218e-06	0.18564	5.66595e-07	0.646357	0.00160845
CSA007224.1	probable inactive receptor kinase At5g58300 isoform X2	3	1	70.31	4.2328	3.1	2	2	1	8.3081	4.2	3	3	2	25.632	10.1	6	6	4			1.392			1.039			0.416	0.746408		0.298851		0.400385
CSA007227.1	armadillo repeat-containing kinesin-like protein 3	1	1	91.371						5.1542	4.1	3	3	3							1.099			0.93			0.938		0.846224		0.853503		1.0086
CSA007228.1	ribosomal protein S12 (chloroplast)	3	3	12.003	2.4185	20.2	2	2	2	3.3236	15.6	2	3	2	3.4939	14.7	2	3	2	1.117	1.162	1.211	1.115	1.161	1.173	0.713	0.603	0.521	0.988252	0.694773	0.526361	0.000879819	0.532618	0.00077324
CSA007231.1	HD domain-containing protein 2 homolog	3	2	16.072	13.12	21	2	3	2	37.23	17.5	2	3	1	15.09	17.5	2	3	0	1.022	1.007		0.967	1.025		0.95	0.963		0.981764	0.599784	0.942829	0.0280543	0.960341	0.315163
CSA007232.1	ER membrane protein complex subunit 3-like	3	3	9.6344	4.0254	27.9	3	4	3	1.6174	19.8	2	2	2	3.0851	19.8	2	2	2	1.174	1.177	1.147	0.945	0.917	0.923	0.816	0.845	0.881	0.796169	4.92818e-05	0.726701	0.000111654	0.912747	0.0171755
CSA007233.1	ER membrane protein complex subunit 3	3	3	19.555	90.028	26.2	3	5	3	141.49	26.2	3	6	3	131.63	26.2	3	7	3	0.971	1.166	1.155	0.939	0.978	0.959	1.106	0.794	0.805	0.873633	0.0970474	0.821689	0.178891	0.940542	0.608909
CSA007242.1	TBC domain-containing protein C215.01 isoform X5	1	1	28.237	2.0305	8.7	2	4	2											1.248			0.956			0.696			0.766026		0.557692		0.728033
CSA007243.1	glutathione S-transferase L3-like	3	3	25.873	106.88	58.1	13	33	10	142.18	58.1	13	29	10	131.72	54.5	12	27	10	0.557	0.55	0.569	0.347	0.38	0.363	2.327	2.294	2.292	0.650358	5.96249e-05	4.1247	1.64429e-08	6.3422	2.0369e-08
CSA007246.1	cytochrome c oxidase subunit 6a, mitochondrial	1	1	8.1111						1.413	14.7	1	1	1							0.502			0.644			2.074		1.28287		4.13147		3.2205
CSA007261.1	nodulin homeobox isoform X2	2	0	42.386	2.2752	2.9	1	1	1	2.4709	2.9	1	1	1
CSA007263.1	gamma carbonic anhydrase-like 2, mitochondrial	2	2	15.256	11.712	25.4	3	5	3	43.373	25.4	3	5	3						1.043	1.066		1.013	0.988		0.932	0.895		0.948791	0.0863193	0.866287	0.0230452	0.913043	0.0599949
CSA007270.1		3	3	6.9647	9.8313	55.7	3	4	3	9.4772	55.7	3	4	3	8.7205	55.7	3	4	3	1.198	1.148	1.107	0.943	1.013	0.917	0.676	0.664	0.788	0.83203	0.00765949	0.616276	0.000741304	0.740689	0.00703447
CSA007271.1	FKBP12-interacting protein of 37 kDa isoform X2	3	2	40.473	26.078	17.6	6	7	4	57.787	17.6	6	7	4	42.852	17.6	6	7	4	1.281		1.076	0.953		0.932	0.661		0.968	0.799745	0.149123	0.691133	0.187356	0.864191	0.492961
CSA007277.1	probable pectate lyase 1	2	0	41.048						2.9599	6.9	2	2	2	3.4206	6.9	2	2	2
CSA007279.1	polygalacturonase inhibitor-like	1	1	36.365	2.6929	2.7	1	1	1											1.082			1.301			0.561			1.2024		0.518484		0.431207
CSA007281.1	FAD-dependent oxidoreductase family protein	3	3	44.27	46.2	18.7	6	7	6	16.887	11.4	4	5	4	17.435	14.5	5	6	5	1.032	1.095	1.089	0.901	0.881	0.864	1.043	1.031	0.929	0.822761	0.00112276	0.933769	0.161217	1.13492	0.0343373
CSA007284.1	DUF538 family protein	2	0	13.656	3.1908	10.7	1	1	1	5.5719	10.7	1	1	1
CSA007286.1	DNA topoisomerase 1-like	1	1	54.795	9.5102	7.7	3	3	3											1.8			0.659			0.26			0.366111		0.144444		0.394537
CSA007287.1	NO EXINE FORMATION 1 family protein	2	2	125						50.662	2.1	1	1	1	30.405	2.1	1	1	1		1.038	1.015		0.967	1.017		0.983	0.962	0.966391	0.33663	0.947394	0.0740438	0.980343	0.546726
CSA007289.1	sterol 14-demethylase-like	3	3	55.52	43.098	29.4	12	15	12	59.815	21.1	9	13	9	57.158	24.9	10	13	10	1.249	1.224	1.389	0.909	0.902	0.869	0.729	0.867	0.597	0.693941	0.00172397	0.56784	0.00397794	0.818284	0.108825
CSA007291.1	protein NRT1/ PTR FAMILY 6.1 isoform X1	3	2	72.738	5.4033	5	3	4	3	2.3942	3.2	2	2	2	7.0287	5.3	3	4	3	0.864		0.685	1.063		1.203	1.121		1.216	1.46288	0.0874723	1.50872	0.0602224	1.03133	0.715524
CSA007292.1	transaldolase family protein	3	3	72.022	239.43	40.5	22	40	15	285.6	37.3	21	39	15	306.39	39.1	22	44	15	1.055	1.141	1.079	0.884	0.863	0.863	0.899	0.89	0.935	0.796947	0.00112671	0.831756	0.00321299	1.04368	0.0694541
CSA007294.1	ubiquinol-cytochrome C reductase iron-sulfur subunit family protein	3	3	32.264	8.8813	12.2	4	7	2	25.166	19	5	8	3	7.8396	12.2	4	6	2	1.182	1.323	1.213	0.832	0.8	0.75	0.929	0.738	0.976	0.640667	0.000811689	0.710866	0.0132135	1.10957	0.319419
CSA007309.1	probable phospholipid hydroperoxide glutathione peroxidase	3	3	13.861	71.683	30.9	4	8	2	60.38	30.9	4	8	2	43.554	30.9	4	8	2	0.44	0.52	0.508	0.979	0.969	1.041	1.769	1.64	1.639	2.0361	0.00011215	3.43869	1.80441e-05	1.68886	0.000146987
CSA007312.1	alpha-1,4-glucan-protein synthase	3	3	41.056	207.28	69.3	19	40	8	259.94	71.5	21	41	8	286.51	65.9	21	45	8	1.162	1.349	1.318	1.021	1.071	1.055	0.724	0.536	0.502	0.821886	0.0189857	0.460172	0.00156963	0.559898	0.00282492
CSA007313.1	exosome complex exonuclease RRP46 homolog	2	0	11.682	2.2856	9.4	1	1	1						3.3587	12.3	1	1	1
CSA007316.1	vacuolar H+-pumping ATPase 16 kDa proteolipid subunit 4	3	3	23.399	7.7912	12.6	2	5	1	13.247	12.6	2	5	1	14.296	12.6	2	4	1	0.997	1.037	1.026	1.144	1.101	1.133	0.849	0.839	0.82	1.10392	0.00380434	0.819608	0.000231351	0.742451	4.7421e-05
CSA007322.1	aconitate hydratase, cytoplasmic	3	2	58.074	2.7587	6.1	3	7	1	3.2106	9.5	6	9	1	3.749	6.1	3	6	1	1.152		1.148	0.992		1.036	0.797		0.755	0.881739	0.0253838	0.674783	0.00316629	0.765286	0.0159406
CSA007323.1	multicopper oxidase LPR1	3	3	65.509	10.218	7.9	3	4	3	20.977	6.5	3	4	3	19.345	6.5	3	5	3	0.505	0.61	0.741	1.059	0.952	1.027	1.622	1.591	1.329	1.63685	0.00636411	2.4472	0.00148294	1.49506	0.00695536
CSA007324.1	uncharacterized lipoprotein syc1174_c isoform X1	1	1	47.672	3.4273	3.2	1	2	1											0.815			1.051			1.201			1.28957		1.47362		1.14272
CSA007327.1	phosphoinositide phosphatase SAC7-like, partial	2	0	22.461						4.4754	9.1	2	3	2	2.0036	4.6	1	1	1
CSA007328.1	2-C-methyl-D-erythritol 2,4-cyclodiphosphate synthase, chloroplastic	3	3	9.0675	10.096	24.4	2	4	2	29.239	51.2	3	5	3	19.939	24.4	2	4	2	0.628	0.704	0.673	1.193	1.125	1.154	1.393	1.303	1.286	1.73167	7.83975e-05	1.98603	7.8393e-05	1.14689	0.0116571
CSA007329.1	2-C-methyl-D-erythritol 2,4-cyclodiphosphate synthase, chloroplastic	3	3	17.265	4.5247	16.5	2	2	2	25.961	16.5	2	2	2	7.5167	16.5	2	3	2	0.652	0.773	0.777	1.16	1.022	1.036	1.31	1.289	1.269	1.4614	0.00486448	1.75658	0.000201524	1.20199	0.00884002
CSA007345.1	serotonin N-acetyltransferase 1, chloroplastic	3	2	29.794	2.8569	4.2	1	1	1	2.8878	4.5	1	1	1	7.2186	11.3	4	4	4	0.775		0.729	0.944		0.852	1.372		1.433	1.19415	0.104918	1.86503	0.0034308	1.5618	0.0117579
CSA007346.1	eukaryotic translation initiation factor 4B3	3	3	42.533	9.2105	12.6	5	5	4	4.4987	7.7	3	4	2	9.8181	12.6	5	6	4	1.423	1.66	1.38	0.717	0.573	0.665	0.685	0.547	0.837	0.438046	0.000984654	0.46359	0.00272149	1.05831	0.705931
CSA007349.1	putative amidase C869.01	1	0	74.136	3.9629	3.6	2	2	1
CSA007350.1	cinnamoyl-CoA reductase 1	3	2	35.986	1.6748	8.3	3	5	1	2.248	13.8	4	4	2	2.2626	8.3	3	4	1	0.861	0.877		1.113	1.119		1.071	1.041		1.28423	0.0011944	1.21519	0.0081634	0.946237	0.0592791
CSA007351.1	protein FLX-like 1	3	3	26.976	14.396	22.3	5	5	5	13.979	13	3	3	3	7.0798	12.1	3	3	3	1.068	1.133	1.066	0.942	0.987	1.049	0.969	0.829	0.857	0.91154	0.0644624	0.812672	0.0132518	0.891538	0.111218
CSA007356.1	SEC12-like protein 2	1	0	70.133											1.4984	2.7	2	3	1
CSA007363.1	DNA-directed RNA polymerase subunit alpha	3	1	11.963	9.1672	24.5	2	3	2	12.67	12.3	1	2	1	6.2084	24.5	2	2	2			1.081			1.015			0.871	0.938945		0.805735		0.858128
CSA007364.1		3	3	11.963	11.773	15	1	1	1	4.314	15	1	1	1	12.106	15	1	1	1	0.988	0.902	1.032	1.029	1.007	1.009	0.985	1.127	0.946	1.04209	0.350417	1.04654	0.535459	1.00427	0.941457
CSA007367.1	alpha,alpha-trehalose-phosphate synthase	3	3	97.428	62.571	17.9	9	11	4	59.899	12.7	7	8	4	54.281	15.8	9	10	6	1.12	1.208	1.123	0.879	0.756	0.851	0.989	0.912	0.99	0.720371	0.00240236	0.837728	0.00852038	1.16291	0.0407569
CSA007370.1	probable fructokinase-4 isoform X2	3	3	35.08	317.5	67.6	18	51	18	323.31	63	17	54	17	323.31	63	17	64	17	1.582	1.673	1.626	0.783	0.75	0.766	0.387	0.35	0.393	0.47101	6.62506e-06	0.23151	1.85602e-06	0.491518	1.89642e-05
CSA007377.1	charged multivesicular body protein 5-like	2	2	18.705	2.1589	6.7	1	2	1						4.7495	11.5	2	3	2	1.299		1.095	1.003		0.959	0.583		0.845	0.819549	0.174296	0.596491	0.100637	0.727829	0.182147
CSA007378.1	SNF7 family protein	1	1	28.75						1.7101	9.9	3	3	3							1.12			0.996			0.838		0.889286		0.748214		0.841365
CSA007383.1	probable glutathione S-transferase parC	3	3	13.18	4.0221	23.9	4	9	2	3.8026	23.9	4	8	2	3.8211	23.9	4	8	2	0.817	0.775	0.938	1.207	1.22	1.183	1.03	1.074	0.889	1.42688	0.00197939	1.183	0.10592	0.829086	0.0223912
CSA007385.1	probable serine/threonine-protein kinase DDB_G0280133	3	3	20.653	32.469	19.7	3	4	3	43.412	19.1	3	4	3	16.382	15.2	2	3	2	1.051	1.101	1.066	1.018	1.054	1.016	0.919	0.801	0.891	0.959602	0.0879307	0.811374	0.00630666	0.845531	0.0134767
CSA007390.1	germin-like protein subfamily T member 2	3	3	21.929	22.687	23.2	4	9	2	26.165	23.2	4	7	2	20.379	23.2	4	7	2	0.778	0.654	0.827	1.35	1.437	1.247	1.043	1.007	1.015	1.78575	0.00141546	1.3568	0.0069571	0.759792	0.00448076
CSA007402.1	photosynthetic NDH subunit of lumenal location 4, chloroplastic	3	2	18.555	6.3867	17.4	2	2	2	4.8559	17.4	2	2	2	6.1272	17.4	2	2	2	0.504	0.418		0.747	0.662		1.959	2.17		1.5282	0.0564761	4.47831	0.00501001	2.93045	0.00692168
CSA007405.1	ubiquitin-conjugating enzyme E2 variant 1D	1	1	30.797											5.8042	43.1	11	24	1			1.167			0.911			0.865	0.780634		0.741217		0.949506
CSA007410.1	armadillo repeat-containing protein 6	3	2	51.119	13.79	7.9	3	6	3	26.218	10.4	5	6	5	16.473	13.2	5	6	5		1.368	1.67		0.782	0.644		0.727	0.458	0.469388	0.0399045	0.390059	0.0444821	0.830996	0.508971
CSA007422.1	D-glycerate 3-kinase, chloroplastic-like	3	3	43.109	149.3	24	7	12	7	147.19	29	9	18	9	184.96	30.8	9	17	9	0.521	0.541	0.497	0.911	0.953	0.922	1.704	1.679	1.783	1.78704	2.16641e-05	3.31366	3.73852e-06	1.85427	1.94647e-05
CSA007431.1	SH3 domain-containing protein 2-like	3	3	38.63	13.467	17.5	5	5	5	12.886	16.3	5	5	5	30.687	26.6	7	7	7	1.317	1.333	1.263	0.887	0.83	0.911	0.742	0.722	0.78	0.671607	0.000180649	0.573473	3.35577e-05	0.853881	0.0121687
CSA007436.1	BSD domain containing protein	3	2	35.04	1.5976	6	1	1	1	6.6779	11.7	3	3	2	2.6014	6	1	1	1	1.15	1.214		1.079	1.017		0.707	0.686		0.886633	0.0950489	0.589255	0.00477759	0.664599	0.00855926
CSA007438.1	aspartate carbamoyltransferase, chloroplastic	3	3	40.567	16.228	21.1	8	9	3	21.874	24.4	9	14	3	19.079	24.7	9	11	4	0.915	0.936	0.991	1.076	1.042	0.99	1.036	1.043	0.996	1.0936	0.0583395	1.08198	0.0450603	0.989382	0.723528
CSA007439.1	adenylyltransferase and sulfurtransferase MOCS3	3	3	23.637	11.111	29.2	6	7	6	5.1838	28.8	5	5	5	11.794	20.3	4	7	4	1.288	1.157	1.16	0.847	0.918	0.964	0.72	0.871	0.817	0.757004	0.00603996	0.667961	0.00295791	0.882374	0.127444
CSA007444.1	ATP-dependent Clp protease proteolytic subunit 6, chloroplastic-like	3	3	23.659	21.987	29.6	5	6	5	22.507	21.8	5	8	5	27.989	13.9	2	3	2	0.733	0.776	0.647	1.143	1.175	1.181	1.121	1.063	1.161	1.62291	0.000352914	1.55148	0.00111933	0.955987	0.170874
CSA007449.1	alpha/beta fold hydrolase	3	3	45.302	81.307	17	6	8	6	88.301	19	7	10	7	90.267	29.8	9	11	9	0.894	0.909	0.903	0.98	1.012	1.007	1.13	1.176	1.169	1.10828	0.00084404	1.28418	6.80406e-05	1.15872	0.000806411
CSA007452.1	altered inheritance of mitochondria protein 32-like	3	3	39.531	10.291	12.5	5	10	4	12.371	15.6	6	11	5	27.141	17.5	5	7	5	1.069	1.075	1.088	1.013	0.983	1.052	0.907	0.937	0.877	0.943069	0.0417104	0.841894	0.000726778	0.892717	0.0145796
CSA007453.1	probable enoyl-CoA hydratase 1, peroxisomal	3	3	14.357	27.771	39.7	4	4	4	18.347	33.8	3	3	3	28.088	33.8	3	3	3	1.017	0.989	0.948	0.929	0.847	0.882	1.044	1.18	1.2	0.899797	0.0336988	1.15911	0.0415949	1.28819	0.00938971
CSA007456.1	GEM-like protein 1	2	1	36.124	1.9695	8.2	3	4	2	2.6868	8.8	3	4	2							1.012			0.87			1.124		0.859684		1.11067		1.29195
CSA007460.1	CDPK-related kinase 4-like isoform X1	1	0	67.471						2.0459	2.5	1	1	1
CSA007465.1	subtilisin-like protease SBT3.11	3	3	12.649	2.4543	7.9	1	2	1	5.1299	19.3	2	3	2	5.9399	19.3	2	3	2	0.963	0.953	0.907	0.984	1.023	1.042	1.068	1.041	1.083	1.08006	0.0360585	1.13071	0.00436978	1.0469	0.0860947
CSA007470.1	vacuolar-processing enzyme-like	2	1	68.634	10.659	10.6	5	6	2						9.0745	7.3	4	7	1	0.537			0.976			1.666			1.8175		3.10242		1.70697
CSA007473.1	apoptosis inhibitor 5-like	3	2	60.337	5.8642	12.4	7	7	3	5.9925	12.4	7	10	4	4.1002	11.1	6	8	3	1.383	1.246		0.928	1.004		0.546	0.655		0.73488	0.0469913	0.456828	0.0146999	0.621636	0.0314907
CSA007481.1	oxidoreductase/ transcriptional repressor	3	3	95.506	7.9678	5.2	4	4	4	12.174	7.8	6	6	6	9.4032	5.1	4	4	4	0.751	0.702	0.714	1.171	1.247	1.277	1.16	1.146	1.096	1.70512	0.000127096	1.56991	7.22078e-05	0.920704	0.0578022
CSA007487.1	AP-4 complex subunit mu isoform X1	3	3	31.177	39.602	14.9	3	4	3	38.926	33	7	7	7	51.242	25.4	5	6	5	1.153	1.099	1.016	1.01	1.005	1.024	0.81	0.857	0.944	0.929927	0.130744	0.79896	0.0173122	0.859164	0.0228186
CSA007488.1	AP-4 complex subunit mu-like	3	3	27.046	3.8477	10	2	3	2	12.249	20.7	4	5	4	9.1236	15.8	3	4	3	1.088	1.039	1.137	0.974	0.979	1	0.905	0.963	0.81	0.904718	0.0242904	0.820466	0.02086	0.906874	0.113049
CSA007496.1	heterogeneous nuclear ribonucleoprotein 1-like	3	3	39.775	153.78	36.6	13	26	7	47.87	29.7	11	25	6	77.459	27.6	11	21	6	1.153	1.17	1.203	0.932	0.941	0.953	0.803	0.752	0.767	0.801475	0.000125103	0.658537	4.48557e-05	0.821656	0.000501039
CSA007507.1	protein PHLOEM PROTEIN 2-LIKE A1-like	2	1	28.915						52.937	7.9	1	1	1	10.999	7.9	1	1	1		0.924			0.965			1.142		1.04437		1.23593		1.18342
CSA007511.1	LOW QUALITY PROTEIN: uncharacter...	1	0	87.389											1.4699	5.4	4	4	1
CSA007512.1	SNARE-interacting protein KEULE isoform X3	2	1	40.609						7.7447	9.6	3	3	2	2.5847	3.1	1	1	1		0.855			1.096			1.098		1.28187		1.28421		1.00182
CSA007514.1	SNARE-interacting protein KEULE	1	1	6.953	1.4671	11.1	1	1	1											1.159			0.992			0.789			0.85591		0.680759		0.795363
CSA007515.1	IRK-interacting protein	2	0	54.696	1.9831	1.8	1	1	1						2.4957	1.8	1	1	1
CSA007518.1	30S ribosomal protein S10, chloroplastic	3	2	21.693	2.6433	8.5	2	4	2	2.2273	5	1	2	1	4.5052	12.1	3	4	3		0.782	0.75		1.226	1.242		1.058	1.085	1.61097	0.00145783	1.39883	0.00466287	0.868314	0.00919699
CSA007520.1	E3 ubiquitin-protein ligase UPL1 isoform X1	3	2	400.57	4.5169	2.4	7	8	1	5.3562	3	10	10	1	6.7941	1.9	7	7	2		0.786	0.719		1.102	1.08		1.186	1.303	1.44983	0.0106768	1.65382	0.0182613	1.1407	0.123197
CSA007523.1	transmembrane emp24 domain-containing protein p24beta2-like	3	3	24.746	10.408	20.6	5	6	5	7.6081	15.4	3	4	3	7.6182	15.4	3	4	3	1.195	1.177	1.185	1.041	1.006	0.999	0.691	0.748	0.745	0.85634	0.000261621	0.614001	1.85148e-05	0.717006	0.000221326
CSA007526.1	sulfhydryl oxidase 2-like isoform X1	3	1	15.555	11.393	22.5	2	2	2	2.894	8	1	1	1	3.7642	8	1	1	1	1.198			0.962			0.766			0.803005		0.639399		0.796258
CSA007539.1	fiber protein Fb34	1	1	18.854											-2	5.7	1	1	1			0.881			1.038			1.123	1.17821		1.27469		1.08189
CSA007543.1	cell division cycle protein 48 homolog	3	2	8.9955	3.9936	45.1	5	8	1	3.8771	45.1	4	9	1	19.391	43.9	4	10	1		0.899	0.867		1.157	1.172		0.97	0.998	1.3188	0.00391731	1.11438	0.0415663	0.844998	0.00765365
CSA007544.1	cell division cycle protein 48 homolog	3	3	79.315	124.2	64.9	40	96	5	178.05	68.1	39	98	6	223.17	67.7	42	98	6	0.968	0.966	0.928	1.126	1.166	1.198	0.854	0.858	0.898	1.21943	0.00103934	0.91195	0.0118125	0.747851	0.000307591
CSA007557.1		3	3	11.038	27.416	23.1	2	2	2	32.396	23.1	2	3	2	1.5232	7.7	1	1	1	0.645	0.524	0.482	0.707	0.57	0.605	1.808	2.141	2.143	1.13992	0.294258	3.68988	0.000261185	3.23698	0.000292783
CSA007562.1	structural constituent of ribosome protein	3	1	8.9804	3.0147	17.3	1	1	1	3.5207	17.3	1	1	1	2.6307	17.3	1	1	1		0.732			0.767			1.622		1.04781		2.21585		2.11473
CSA007565.1	60S ribosomal protein L22-2	3	3	21.558	28.837	25.4	4	8	4	43.057	29.6	5	7	5	27.597	25.4	4	7	4	1.72	1.624	1.716	0.734	0.777	0.821	0.295	0.361	0.389	0.46087	2.25619e-05	0.206522	5.75256e-06	0.448113	0.000333601
CSA007577.1	universal stress protein A-like protein	2	2	17.689						3.1001	7.9	1	1	1	27.361	15.9	2	2	2		0.799	0.738		1.053	0.938		1.22	1.428	1.29538	0.0732918	1.72284	0.0360213	1.32998	0.109742
CSA007583.1	tetratricopeptide repeat protein 38-like isoform X3	3	3	56.886	48.516	22.4	8	8	8	48.539	22	8	8	8	28.504	12.8	5	5	5	1.167	1.256	1.252	1.032	1.011	1.057	0.735	0.653	0.643	0.843537	0.00387322	0.552653	0.000183452	0.655161	0.000371596
CSA007585.1	50S ribosomal protein L29, chloroplastic	3	3	20.321	19.56	17.4	3	4	3	17.197	23	6	9	6	35.073	23	6	8	6	1.194	1.283	1.181	1.309	1.136	1.181	0.398	0.529	0.501	0.991252	0.869541	0.390377	0.000130131	0.393822	0.000360617
CSA007586.1	tubulin-folding cofactor C-like	3	3	38.672	10.663	21.1	6	7	6	20.396	21.1	6	6	6	39.945	28.7	7	7	7	1.316	1.217	1.134	0.8	0.912	0.92	0.779	0.795	0.927	0.717753	0.00616614	0.682029	0.00527582	0.950228	0.512504
CSA007589.1	methylthioribose-1-phosphate isomerase	3	3	40.311	97.923	42.6	12	16	12	198.35	30.5	10	15	10	108.39	32.9	11	15	11	1.115	1.129	1.144	0.994	0.991	0.984	0.817	0.799	0.785	0.876328	9.55416e-05	0.708678	1.23265e-05	0.80869	4.10221e-05
CSA007590.1	inter alpha-trypsin inhibitor, heavy chain 4	2	2	81.902	11.088	2.3	1	1	1						6.4399	2.3	1	1	1	0.896		0.952	0.91		0.977	1.241		1.091	1.0211	0.698848	1.2619	0.0942236	1.23582	0.113544
CSA007591.1	protein DJ-1 homolog D-like isoform X1	3	3	17.996	56.354	32.9	5	8	5	135.57	32.9	5	12	5	84.599	32.9	5	12	5	0.732	0.772	0.723	1.111	1.111	1.131	1.213	1.184	1.243	1.50561	2.19573e-05	1.63449	3.20735e-05	1.08559	0.00638238
CSA007592.1	protein DJ-1 homolog D	3	3	19.311	37.678	17.1	2	5	2	41.392	17.1	2	5	2	43.523	17.1	2	5	2	0.753	0.74	0.728	1.086	1.088	1.138	1.229	1.253	1.224	1.49122	3.93133e-05	1.66862	1.74092e-06	1.11896	0.00239965
CSA007602.1	monothiol glutaredoxin-S7, chloroplastic	3	3	19.982	52.134	19.9	3	4	3	81.473	28.7	4	6	4	31.303	19.9	3	4	3	0.609	0.613	0.627	1.001	1.064	1.009	1.54	1.466	1.477	1.66252	3.77744e-05	2.42455	3.16474e-06	1.45836	0.000102304
CSA007603.1	WD repeat-containing protein LWD1	2	1	47.451	5.3331	3.3	1	1	1						3.7603	5.3	2	2	2	1.037			1.053			0.892			1.01543		0.860174		0.847104
CSA007605.1	acetyl-coenzyme A synthetase, chloroplastic/glyoxysomal isoform X1	3	3	93.26	138.72	21.9	15	20	15	157.47	24	17	25	17	74.122	19.3	14	20	14	0.871	0.845	0.819	0.875	0.913	0.876	1.278	1.333	1.374	1.05089	0.0925461	1.57199	0.000106616	1.49587	0.000133667
CSA007621.1	GTPase LSG1-2	3	1	69.16	1.8637	1.6	1	1	1	1.1223	1.5	1	1	1	3.1435	3.1	2	2	2			1.189			0.979			0.762	0.823381		0.640875		0.778345
CSA007624.1	outer envelope protein 80, chloroplastic isoform X3	2	1	38.892	2.1576	5.8	2	2	2						2.0718	3.1	1	1	1			0.994			1.017			0.99	1.02314		0.995976		0.973451
CSA007625.1	non-specific phospholipase C4-like	1	1	24.509						1.4975	3.7	1	1	1							0.878			0.843			1.338		0.960137		1.52392		1.58719
CSA007629.1	protein cornichon homolog 1 isoform X1	2	1	19.494						2.3556	6.6	1	1	1	2.8188	6.6	1	1	1		0.883			1.236			0.908		1.39977		1.02831		0.734628
CSA007638.1	UPF0301 protein MAB_4928c	3	2	40.345	68.546	13.4	3	3	3	3.8114	7.9	2	2	2	98.421	13.4	3	3	3	0.967		0.921	1.236		1.099	0.791		1.002	1.23676	0.0905519	0.949682	0.702978	0.76788	0.164018
CSA007658.1	copper ion-binding protein	3	3	43.801	139.88	7.2	3	5	3	45.317	13.8	5	9	5	90.027	13.8	5	8	5	0.571	0.772	0.736	0.929	0.938	0.977	1.671	1.382	1.403	1.36797	0.016011	2.14334	0.00208797	1.56681	0.00466752
CSA007660.1	pentatricopeptide repeat-containing protein At3g02490, mitochondrial	3	3	73.538	36.447	12.4	6	8	6	43.227	12.7	7	8	7	45.09	14.9	8	8	8	1.14	1.133	1.18	1.029	1.038	1.034	0.79	0.784	0.724	0.89806	0.00139495	0.665508	0.000114934	0.741051	0.000227876
CSA007666.1	pyruvate dehydrogenase E1 component subunit beta, mitochondrial	3	3	37.374	25.698	26.6	8	11	3	17.526	22.1	7	11	2	15.025	24.4	8	13	2	1.204	1.155	1.101	0.998	1.066	1.075	0.72	0.714	0.779	0.907225	0.0495383	0.639595	0.000330544	0.705002	0.000642311
CSA007672.1	mitochondrial import inner membrane translocase subunit Tim9	3	3	10.869	35.525	65.6	6	10	6	100.2	74.2	7	15	7	49.624	73.1	7	15	7	1.008	1.015	0.967	1.05	1.084	1.051	0.966	0.923	0.953	1.06522	0.0253537	0.950502	0.0660378	0.892308	0.00251116
CSA007673.1	RNA-binding protein 1 isoform X1	3	3	24.796	137.3	42	7	13	4	63.4	39.4	7	12	4	117.48	42	7	9	4	1.121	1.083	1.099	1.028	0.961	1.03	0.803	0.926	0.832	0.914018	0.0198536	0.775356	0.00308353	0.848294	0.0246807
CSA007680.1	L-ascorbate peroxidase 3, peroxisomal	3	3	9.9832	6.5037	31.1	2	7	1	1.3292	41.1	3	8	1	5.0343	41.1	3	8	1	0.676	0.897	0.728	1.222	1.082	1.216	1.209	1.055	1.143	1.52977	0.00735948	1.48066	0.0100767	0.967898	0.587016
CSA007682.1	L-ascorbate peroxidase 3, peroxisomal	3	3	10.572	7.459	56.4	6	11	2	6.212	56.4	5	9	2	5.8232	46.8	5	8	1	0.605	0.611	0.621	1.078	1.116	1.011	1.463	1.413	1.513	1.74469	0.000125038	2.38922	8.31276e-06	1.36942	0.000723672
CSA007684.1	plasminogen activator inhibitor 1 RNA-binding protein	3	3	50.219	48.366	18.1	8	11	6	76.4	18.3	9	11	8	153.75	22.2	8	10	7	1.314	1.289	1.375	0.866	0.893	0.865	0.746	0.733	0.62	0.659628	7.65678e-05	0.527652	0.000190566	0.799924	0.0130187
CSA007686.1	ELMO domain-containing protein A-like isoform X1	2	0	24.268						1.4841	4.4	1	1	1	2.5285	7.8	2	2	2
CSA007687.1	nucleoside diphosphate kinase B	3	3	16.372	56.46	42.6	7	18	3	11.191	42.6	7	16	3	46.017	58.8	8	17	4	1.12	1.024	1.123	0.939	0.917	0.974	0.85	0.943	0.877	0.866238	0.0162571	0.817264	0.00955648	0.943463	0.17326
CSA007688.1	importin-5	3	3	123.54	187.71	29.7	24	33	12	206.31	28.9	23	38	13	157.95	28.7	22	32	12	1.102	1.207	1.119	0.981	0.906	0.937	0.885	0.831	0.84	0.823804	0.00677507	0.745624	0.00135778	0.905099	0.0311781
CSA007689.1	tubulin alpha-3 chain	3	3	49.628	139.65	42.6	15	39	5	86.557	47.5	17	43	5	56.497	46.2	17	36	5	1.249	1.125	1.205	0.956	0.988	0.955	0.757	0.856	0.78	0.810003	0.00392059	0.668623	0.00109649	0.825457	0.00608138
CSA007697.1		2	0	10.499						2.7545	18.9	1	1	1	3.3554	18.9	1	1	1
CSA007703.1	uridine-cytidine kinase C	1	0	74.648						5.4232	5.7	4	4	2
CSA007707.1	probable inactive receptor kinase At1g48480	2	0	69.482	7.1238	6.5	3	3	2						6.4333	5	2	2	1
CSA007708.1	ADP-ribosylation factor-like protein 8B	1	0	13.767											3.9991	11.8	1	1	1
CSA007711.1	60S ribosomal protein L38 isoform X1	3	3	9.7273	28.744	44.6	3	8	3	39.128	44.6	3	7	3	22.483	44.6	3	7	3	1.46	1.599	1.566	0.836	0.769	0.831	0.581	0.408	0.43	0.526703	0.000101701	0.306811	9.94912e-05	0.582512	0.00440513
CSA007712.1	U-box domain-containing protein 13-like	2	1	71.365						1.8624	1.5	1	1	1	3.6646	1.5	1	1	1			1.253			0.922			0.734	0.735834		0.585794		0.796095
CSA007715.1	subtilisin-like protease SBT1.7	3	3	81.217	35.521	10.6	7	9	7	49.578	18.4	9	11	9	40.064	12.3	7	10	7	0.488	0.545	0.44	1.611	1.536	1.793	0.862	0.86	0.836	3.3537	0.000147932	1.73659	0.00032753	0.517814	0.000492939
CSA007720.1	protein REDUCED WALL ACETYLATION 3-like, partial	2	0	69.171	9.8526	2.2	1	1	1	8.0748	3.6	3	4	1
CSA007722.1	30S ribosomal protein S1-like, partial	3	3	79.869	155.64	27.6	17	20	17	155.56	34.4	21	24	21	65.135	22.6	15	21	15	0.507	0.58	0.552	1.203	1.169	1.146	1.363	1.334	1.366	2.14643	2.03108e-05	2.47895	4.33052e-06	1.15492	0.000731259
CSA007723.1		2	2	21.872						1.2781	9.9	1	1	1	12.09	20.2	3	3	3		0.323	0.534		0.978	0.853		1.961	1.803	2.13652	0.0579443	4.39207	0.0081224	2.05571	0.010689
CSA007724.1	titin-like isoform X1	3	3	52.251	87.954	39.9	19	36	19	172.82	54.6	26	40	26	100.35	43.1	22	37	22	0.386	0.553	0.487	1.2	1.149	1.154	1.649	1.406	1.534	2.45652	0.000173116	3.21809	0.000246712	1.31002	0.00735725
CSA007726.1	DNA-directed RNA polymerases II and IV subunit 5A	2	1	14.569						1.8213	15.3	2	2	1	3.4553	18.5	2	2	1		1.4			0.797			0.666		0.569286		0.475714		0.835634
CSA007727.1	DNA-directed RNA polymerases II and IV subunit 5A	3	3	9.7721	4.6057	22	1	1	1	23.662	22	1	1	1	16.617	22	1	1	1	1.226	1.343	1.332	0.885	0.821	0.797	0.81	0.719	0.76	0.64163	0.000517599	0.586773	0.000298035	0.914503	0.127453
CSA007730.1	probable leucine-rich repeat receptor-like protein kinase At1g35710	3	3	66.18	2.5784	4.7	2	2	2	7.1182	4.7	2	2	2	8.8231	6.9	3	3	3	0.902	1	0.858	1.032	1.01	1.065	1.101	0.989	1.126	1.12572	0.0616128	1.16522	0.0628856	1.03508	0.465195
CSA007736.1	GDP-mannose transporter GONST1 isoform X1	1	1	51.171											5.827	3.4	1	1	1			1.246			0.847			0.825	0.679775		0.662119		0.974026
CSA007743.1	protein NUCLEAR FUSION DEFECTIVE 5, mitochondrial	1	1	43.502	8.7578	12.4	5	5	5											1.147			1.061			0.73			0.925022		0.636443		0.68803
CSA007747.1	T-complex protein 1 subunit eta	3	3	88.052	258.66	52	25	45	25	268.38	44	23	45	23	274.13	40.4	21	41	21	1.366	1.388	1.377	0.829	0.827	0.852	0.643	0.661	0.626	0.607117	7.65498e-07	0.467199	4.19451e-07	0.769537	0.000117109
CSA007750.1	uncharacterized acetyltransferase At3g50280-like	3	3	51.141	6.8515	5.7	2	2	2	60.264	4.2	2	2	2	25.381	8.8	4	4	4	0.562	0.273	0.449	0.963	0.978	1.006	1.647	2.03	1.718	2.29517	0.00285771	4.20171	0.000691662	1.83068	0.00231675
CSA007753.1	4-coumarate--CoA ligase 2-like	3	3	59.532	84.3	17.7	7	8	6	112.44	20.8	7	10	5	40.698	12.9	6	8	5	1.338	1.288	1.389	0.83	0.86	0.822	0.716	0.756	0.66	0.625654	8.98313e-05	0.531009	9.93596e-05	0.848726	0.013679
CSA007758.1	acetolactate synthase 1, chloroplastic	3	3	71.131	178.28	39.3	20	31	20	213.34	37.2	20	31	20	207.15	37.9	19	35	19	1.204	1.265	1.19	0.95	0.954	1.02	0.725	0.692	0.738	0.799125	0.00162591	0.588959	4.79882e-05	0.737004	0.000639664
CSA007759.1	histone deacetylase 6-like	3	3	43.774	20.413	19.7	6	6	6	10.621	10.8	4	5	4	10.984	10.8	4	5	4	1.315	1.355	1.237	0.833	0.873	0.87	0.756	0.64	0.781	0.659329	0.000276011	0.557205	0.000486604	0.845109	0.0425632
CSA007766.1	ubiquitin carboxyl-terminal hydrolase 9	3	1	135.55	8.0704	2.6	3	3	2	13.561	3.1	3	3	2	5.3602	3.3	3	3	2	1.054			1.053			0.868			0.999051		0.823529		0.824311
CSA007767.1	splicing factor 3B subunit 1	3	3	102.26	184.82	26.5	18	21	15	178.23	23.5	17	23	10	269.13	26.7	19	24	13	1.099	1.085	1.118	1.106	1.131	1.125	0.645	0.653	0.693	1.01817	0.175778	0.602968	1.58311e-05	0.592207	1.04787e-05
CSA007773.1	probable plastid-lipid-associated protein 8, chloroplastic	1	0	28.634	4.1183	8.4	2	2	2
CSA007777.1	ATPase ASNA1 homolog 2	3	3	21.892	8.6597	24.2	4	4	3	3.1133	11.3	2	2	1	2.6987	11.3	2	2	1	1.023	1.094	1.002	1.032	0.852	0.982	0.934	1.029	1.016	0.918884	0.235375	0.955114	0.315806	1.03943	0.572355
CSA007781.1	beta-glucosidase BoGH3B-like	3	3	54.187	119.27	18.5	8	16	5	177.94	16.8	7	14	4	135.53	18.3	8	15	5	0.843	0.809	0.8	1.302	1.39	1.467	1.021	0.887	0.839	1.69617	0.000325241	1.12031	0.154004	0.660495	0.00288453
CSA007783.1	beta-1,3-galactosyltransferase 7	2	2	31.883	6.1457	10.4	2	2	1	8.9596	10.4	2	2	1						0.974	1.053		1.072	1.03		0.957	0.894		1.037	0.490103	0.913172	0.223667	0.88059	0.0802034
CSA007784.1	probable sarcosine oxidase	3	3	45.103	10.448	10.2	3	4	3	8.1681	6.6	2	4	2	10.089	11.9	4	4	4	0.812	0.89	0.907	1.01	1.374	1.014	1.25	0.749	1.114	1.30241	0.101556	1.19318	0.332198	0.916127	0.647001
CSA007785.1	rhomboid-like protein 20	3	3	32.382	6.2251	9.2	3	4	3	1.6992	2.4	1	2	1	5.2724	7.9	2	3	2	1.064	1.011	0.988	0.935	0.999	0.967	0.981	0.985	1.051	0.947111	0.137235	0.984982	0.656448	1.03999	0.256926
CSA007793.1	J domain-containing protein DDB_G0295729-like	3	3	35.031	20.659	18.7	6	8	6	23.786	15.9	5	6	5	26.262	11.4	4	7	4	1.222	1.321	1.206	0.882	0.898	0.909	0.804	0.703	0.809	0.717258	0.000658316	0.617765	0.000663244	0.861287	0.0246412
CSA007794.1	kinesin-like protein FRA1	2	1	146.37	7.8122	1.8	2	2	2						6.567	1.8	2	2	2			1.564			0.798			0.438	0.51023		0.280051		0.548872
CSA007795.1	Argininosuccinate lyase	3	3	63.766	101.26	22.4	10	14	10	134.9	28.4	13	20	13	58.617	19.3	10	15	10	1.125	1.135	1.175	0.995	0.996	0.98	0.825	0.805	0.803	0.86492	0.000660752	0.708297	3.78803e-05	0.818916	3.30813e-05
CSA007800.1	ribosome maturation protein SBDS	3	2	51.189	14.031	9	4	5	3	3.8479	5.7	3	4	2	13.054	8.4	4	5	3	1.093		1.111	1.046		1.105	0.822		0.733	0.975953	0.480766	0.705535	0.0190183	0.72292	0.0306316
CSA007802.1		2	2	22.962						3.9514	5.8	1	1	1	2.5956	5.8	1	1	1		1.09	1.138		1.03	1.007		0.844	0.801	0.914273	0.0696421	0.73833	0.0119992	0.80756	0.0151251
CSA007810.1	transcriptional corepressor SEUSS	3	1	57.484	3.4046	3.7	2	2	2	1.9679	2.1	1	2	1	3.9518	4.9	2	2	2			0.963			1.031			1.018	1.07061		1.05711		0.987391
CSA007811.1	mitochondrial outer membrane protein porin of 34 kDa	3	3	25.121	64.295	41.8	8	22	4	76.971	41.8	8	21	4	68.629	41.8	7	21	4	1.01	1.018	1.018	1.031	1.025	1.045	0.985	0.984	0.969	1.01806	0.0477582	0.964544	0.00347457	0.947436	0.00230529
CSA007814.1	hypersensitive-induced response protein 1	1	0	19.087						3.9767	7.1	1	1	1
CSA007815.1	hypersensitive-induced response protein 2	3	3	31.467	153.03	51.4	13	41	5	210.6	53.8	14	42	6	158.61	47.9	14	41	6	0.864	0.816	0.821	1.12	1.093	1.095	1.064	1.147	1.108	1.32267	0.000105386	1.32707	0.00065836	1.00333	0.892617
CSA007827.1	beta-galactosidase 10	3	3	27.503	39.984	23	4	6	4	98.727	23	4	7	4	56.894	23	4	5	4	1.035	1.233	1.062	1.172	1.132	1.165	0.616	0.545	0.679	1.04174	0.504176	0.552553	0.00244866	0.530412	0.000181136
CSA007828.1	beta-galactosidase 3 isoform X2	2	0	15.718	1.8024	14.6	1	1	1	1.3627	14.6	1	2	1
CSA007829.1	beta-galactosidase 10	3	3	17.255	7.7705	13.5	2	3	2	5.6478	7.1	1	2	1	6.4506	13.5	2	3	2	1.076	1.178	1.116	1.141	1.172	1.091	0.743	0.567	0.742	1.01009	0.779868	0.608902	0.00258545	0.60282	0.00203051
CSA007831.1	beta-galactosidase 10	3	3	24.789	58.181	37.4	8	15	8	61.489	41.1	9	17	9	58.126	37.4	7	14	7	1.129	1.176	1.143	1.158	1.057	1.117	0.634	0.672	0.67	0.966357	0.299536	0.573086	1.23139e-05	0.593037	0.000142633
CSA007833.1	BTB/POZ domain protein TNFAIP protein	3	2	29.665	4.2038	11.8	2	2	2	4.1775	5.1	1	1	1	21.03	6.6	1	1	1	1.205	1.181		0.702	0.788		1.039	0.979		0.624476	0.00978454	0.845767	0.0294797	1.35436	0.0372526
CSA007834.1	probable glucan 1,3-alpha-glucosidase	3	3	91.628	82.673	22.3	16	29	16	102.89	23.4	15	27	15	100.84	23.4	17	25	17	1.127	1.139	1.114	1.031	1.066	1.044	0.759	0.715	0.781	0.92929	0.00311578	0.66716	5.46095e-05	0.717924	0.000175791
CSA007836.1	probable E3 ubiquitin-protein ligase HERC1-like	3	3	48.025	305.77	44.2	13	27	13	323.31	44.6	14	28	14	323.31	49.8	16	32	16	1.242	1.22	1.246	0.988	1.001	1.008	0.603	0.648	0.711	0.808252	1.86697e-05	0.529126	5.60929e-05	0.654655	0.000412847
CSA007839.1	structural maintenance of chromosomes protein 2-1-like	3	3	54.315	29.343	19.7	9	10	9	23.555	14.5	7	7	7	61.953	23.5	11	13	11	1.372	1.394	1.323	0.933	0.895	0.947	0.577	0.568	0.649	0.67865	7.39913e-05	0.438738	2.0834e-05	0.646486	0.000400769
CSA007840.1	plant/T7H20-70 protein	1	0	18.214	2.0846	6	1	1	1
CSA007842.1	probable glutathione S-transferase	3	3	26.093	14.272	23.6	5	5	5	10.513	18.2	4	4	4	46.726	14.2	3	4	3	0.572	0.5	0.438	1.748	1.743	1.863	0.785	0.89	0.953	3.5457	2.02558e-05	1.7404	0.00396091	0.490848	0.000132193
CSA007843.1	rop guanine nucleotide exchange factor 7-like isoform X2	2	1	64.689	3.6164	2.8	2	2	2	8.8779	2.8	2	2	2						0.96			0.992			1.065			1.03333		1.10938		1.07359
CSA007846.1	chaperone protein DnaJ-like	3	3	12.971	4.4051	9	1	2	1	3.1497	9	1	2	1	3.7599	9	1	3	1	1.256	1.145	1.143	0.862	0.924	1.033	0.794	0.881	0.767	0.795429	0.0179381	0.689052	0.00193556	0.866265	0.10708
CSA007847.1	probable transcription factor PosF21	3	2	60.498	7.7722	9.9	5	5	5	6.9103	3.8	2	3	2	10.355	10.1	5	6	5	1.249		1.2	0.795		0.919	0.876		0.811	0.699878	0.0313666	0.688853	0.0112198	0.984247	0.864883
CSA007849.1	subtilisin-like protease SBT1.5	3	1	82.486	10.023	4.5	2	2	2	24.087	10.1	4	4	4	3.1117	1.6	1	1	1	0.701			0.892			1.53			1.27247		2.1826		1.71525
CSA007851.1	ATP-dependent zinc metalloprotease FTSH, chloroplastic	3	3	75.17	101.99	46.2	28	55	7	85.782	45.6	25	54	7	31.961	42.4	26	53	6	0.75	0.628	0.572	1.104	1.143	1.112	1.297	1.275	1.324	1.72256	0.000953781	1.99795	0.000283894	1.15987	0.000638333
CSA007860.1	Kinesin-related protein 11	3	2	34.481	1.8264	3	1	2	1	2.4853	3	1	3	1	1.6859	3	1	3	1	1.27	1.316		1.068	1.072		0.553	0.486		0.827533	0.0105488	0.401779	0.00274852	0.485514	0.00369579
CSA007863.1	membrane-associated progesterone-binding protein 4-like	1	1	13.181	1.9266	8.5	1	1	1											1.072			1.168			0.718			1.08955		0.669776		0.614726
CSA007867.1	probable gamma-secretase subunit PEN-2	1	0	17.537											5.1949	10.3	1	1	1
CSA007873.1	probable plastid-lipid-associated protein 7, chloroplastic	3	1	22.417	7.9205	26	4	4	4	5.2601	20.5	3	3	3	8.1634	16	2	2	2	0.46			0.851			1.909			1.85		4.15		2.24324
CSA007874.1	protein BOLA2-like	3	2	10.394	5.9883	28.7	3	5	3	3.0576	17	2	4	2	4.1823	17	2	4	2	0.992		1.026	1.004		0.931	1.007		1.039	0.95887	0.411022	1.01388	0.609602	1.05736	0.298353
CSA007878.1	coatomer subunit alpha-1	3	3	136.72	323.31	53.2	58	93	6	38.633	52.8	54	93	6	22.553	45.4	45	73	5	1.196	1.168	1.236	0.991	0.994	0.991	0.626	0.705	0.695	0.826667	0.000460351	0.562778	7.82349e-05	0.68078	0.000218664
CSA007884.1	11-oxo-beta-amyrin 30-oxidase isoform X2	3	3	60.309	9.6067	7.6	4	4	4	6.1663	3.2	2	2	2	10.138	7.4	4	5	4	0.979	0.873	0.695	0.977	1.096	1.108	1.054	1.073	1.306	1.24892	0.0850595	1.34786	0.0634067	1.07922	0.409012
CSA007886.1	protein YLS3	2	0	13.945	25.428	15.8	2	3	2						1.5776	10.5	1	1	1
CSA007887.1	LOW QUALITY PROTEIN: putative vesicle-associated membrane protein 726	3	3	26.529	39.855	33.5	6	13	1	59.442	34.3	7	16	1	58.376	41.1	9	17	1	1.091	1.138	1.18	1.063	0.993	0.981	0.806	0.816	0.771	0.890877	0.026779	0.701965	0.000311625	0.787949	0.00177226
CSA007889.1	vesicle-associated membrane protein 721-like	3	3	21.575	6.4589	31.6	6	11	1	5.7278	29	6	13	1	7.4601	36.3	8	14	1	1.222	1.17	1.115	0.958	0.97	1.032	0.739	0.797	0.807	0.844026	0.00904152	0.668092	0.000490713	0.791554	0.00275195
CSA007894.1	shikimate O-hydroxycinnamoyltransferase	3	3	48.521	12.285	9.4	4	4	2	2.0118	4.6	2	3	1	7.5652	7.3	3	4	1	0.975	1.077	1.02	1.267	1.199	1.389	0.746	0.678	0.552	1.25488	0.0142905	0.643229	0.00466683	0.512581	0.00140277
CSA007896.1	probable receptor-like protein kinase At1g80640 isoform X1	1	0	49.431						1.2533	2.2	1	1	1
CSA007903.1	tRNA(Ile)-lysidine synthase	3	3	84.737	70.663	12.7	6	10	6	61.657	12.6	6	10	6	123.75	15.8	8	14	8	0.846	0.842	0.839	1.127	1.115	1.164	1.054	1.042	1.053	1.34784	3.92835e-05	1.24614	1.15509e-06	0.924545	0.00492301
CSA007904.1	ras-related protein Rab7-like	3	3	23.156	11.693	52.4	7	11	2	40.791	66.5	10	14	3	10.821	55.8	9	13	2	0.717	0.765	0.847	0.967	1.035	0.999	1.428	1.287	1.213	1.28854	0.00633297	1.68656	0.00192978	1.3089	0.00945968
CSA007906.1	Vacuolar protein 8	2	0	69.823	2.7097	1.9	1	1	1	2.0416	1.9	1	1	1
CSA007916.1	granule-bound starch synthase 2, chloroplastic/amyloplastic isoform X1	1	0	75.523											6.0879	4.9	2	4	0
CSA007920.1	26S proteasome non-ATPase regulatory subunit 4 homolog	3	3	42.932	217.42	48.8	12	21	7	319.14	57.4	15	26	10	204.97	34	11	17	7	1.132	1.169	1.178	0.978	0.989	0.977	0.852	0.805	0.806	0.84622	0.000257271	0.707962	8.54876e-05	0.836617	0.000553751
CSA007921.1	scopoletin glucosyltransferase-like	3	3	50.825	37.018	17.1	6	9	6	34.656	13.5	5	8	5	32.942	26.5	8	12	8	1.044	1.057	1.052	1.038	1.054	1.055	0.887	0.863	0.848	0.998097	0.779652	0.823977	0.00010236	0.825548	0.000131616
CSA007922.1	protein LOW PSII ACCUMULATION 3, chloroplastic	3	3	36.735	24.73	20.7	7	8	7	17.055	17.3	5	6	5	13.657	13	5	6	5	0.63	0.488	0.442	1.12	1.141	1.125	1.338	1.534	1.573	2.17051	0.000433704	2.84936	0.000475946	1.31276	0.00842098
CSA007924.1	protein transport protein SEC13 homolog B	2	2	32.803	5.6876	12	3	6	1	16.952	12	3	6	1						1.183	1.138		1.032	0.981		0.712	0.829		0.867299	0.0454647	0.663938	0.024869	0.765524	0.0659671
CSA007929.1	OPA3-like protein	2	0	11.494						2.7069	10.8	1	1	1	3.4972	10.8	1	1	1
CSA007932.1	tryptophan synthase beta chain 1-like	3	3	32.704	3.0069	15.7	5	11	1	1.3237	18.3	6	12	1	3.0298	18.7	6	11	2	1.19	1.212	1.24	0.892	0.841	0.896	0.853	0.879	0.779	0.721856	0.000122369	0.689456	0.000345625	0.955116	0.321499
CSA007940.1	biotin carboxylase 1, chloroplastic-like	3	3	36.52	132.4	53.4	13	31	13	124.01	42.1	11	25	11	159.9	46.6	11	27	11	0.959	0.942	0.928	1.193	1.22	1.223	0.816	0.81	0.841	1.28526	3.31132e-05	0.87204	0.000761751	0.678493	8.46882e-06
CSA007941.1	biotin carboxylase 1, chloroplastic	3	3	40.382	140.87	52.1	14	31	14	90.657	44.3	13	32	13	117.02	41.7	12	32	12	0.949	0.931	0.973	1.197	1.188	1.165	0.822	0.849	0.841	1.2443	0.000114023	0.880477	0.00145428	0.707606	9.95751e-06
CSA007944.1	iron-sulfur cluster co-chaperone protein HscB, mitochondrial isoform X1	3	3	35.421	30.598	20.7	5	8	5	39.982	24.6	6	9	6	27.778	18.4	5	9	5	1.106	1.149	1.155	1.034	1.019	0.999	0.817	0.812	0.813	0.895015	0.00295132	0.716129	3.15143e-05	0.800131	3.8132e-05
CSA007948.1	NAD(P)H dehydrogenase (quinone) FQR1	3	3	21.733	21.487	40.9	7	9	3	2.0842	21.2	5	7	1	42.518	39.4	7	8	3	1.298	1.116	0.826	1.061	1.089	1.018	0.521	0.744	1.222	0.977778	0.871284	0.767593	0.369233	0.785038	0.33605
CSA007956.1	harpin-induced family protein	3	1	9.9554	1.545	11.8	1	1	1	1.657	11.8	1	1	1	2.5056	11.8	1	2	1			0.764			1.497			0.791	1.95942		1.03534		0.52839
CSA007961.1	geranylgeranyl diphosphate reductase, chloroplastic	3	3	51.778	176.86	45.3	16	30	16	134.16	42.9	17	35	17	202.49	49.1	18	36	18	1.153	1.232	1.27	0.88	0.88	0.832	0.845	0.794	0.806	0.709166	0.000735748	0.668947	0.00043436	0.943287	0.0919482
CSA007965.1	thioredoxin X, chloroplastic-like	3	3	11.757	17.238	49.5	6	11	6	11.249	41.6	5	11	5	23.174	49.5	5	12	5	0.462	0.403	0.372	0.938	0.953	0.875	1.782	1.823	1.976	2.23605	0.000138386	4.51172	2.35505e-05	2.01772	0.000123495
CSA007966.1	E3 ubiquitin-protein ligase RING1-like	3	2	35.454	20.649	8.2	1	1	1	7.4118	3.9	1	1	1	6.2035	3.9	1	1	1		0.991	1.098		1.087	1.09		0.919	0.767	1.04213	0.49743	0.807085	0.162441	0.77446	0.0839728
CSA007969.1	peroxisomal nicotinamide adenine dinucleotide carrier-like isoform X3	3	1	13.104	3.3787	9	2	2	2	3.1801	9	1	1	1	2.9996	9	1	2	1			0.963			0.742			1.329	0.770509		1.38006		1.79111
CSA007970.1	peroxisomal nicotinamide adenine dinucleotide carrier-like, partial	2	1	26.072						1.5946	3.8	1	1	1	1.7765	3.8	1	1	1			1.206			0.967			0.751	0.801824		0.62272		0.776629
CSA007971.1	probable signal peptidase complex subunit 2	3	3	13.922	22.972	28.9	3	6	3	58.313	37.2	4	4	4	46.387	37.2	4	6	4	1.108	1.199	1.102	0.995	1.005	1.098	0.891	0.716	0.785	0.908771	0.0844202	0.701672	0.0047729	0.772111	0.0177358
CSA007972.1	probable signal peptidase complex subunit 2	3	3	10.303	5.1152	28.7	2	2	2	28.679	28.7	2	3	2	6.3446	28.7	2	2	2	1.138	1.18	1.305	1.065	1.025	1.025	0.738	0.725	0.552	0.859785	0.0309953	0.556169	0.00236766	0.64687	0.00395391
CSA007977.1	probable auxin efflux carrier component 1b	3	2	68.031	3.6511	4.3	2	2	1	7.9458	4.3	2	2	1	2.958	4.3	2	2	1	1.232		1.234	0.851		0.889	0.839		0.796	0.705596	0.00273596	0.663017	0.00267257	0.939655	0.20878
CSA007981.1	general transcription factor IIH subunit 2 isoform X2	2	0	58.816						4.2982	3.2	1	1	1	1.7749	3.6	1	1	1
CSA007986.1	N6-adenosine-methyltransferase MT-A70-like	3	3	85.677	17.219	7.2	4	4	4	9.8498	6.6	5	5	5	45.835	8.3	5	5	5	1.314	1.137	1.283	0.949	0.941	0.976	0.603	0.875	0.702	0.767542	0.00649475	0.583824	0.00579687	0.760642	0.0463135
CSA007988.1	stellacyanin	1	0	22.42	1.7216	3.4	1	1	1
CSA007989.1	COP9 signalosome complex subunit 1	1	1	51.545											7.3986	11	4	7	1			1.115			1.018			0.822	0.913004		0.73722		0.807466
CSA007990.1	probable glutathione S-transferase	2	0	12.288	1.3582	29	4	8	0						1.5265	22.4	3	6	0
CSA007991.1	probable glutathione S-transferase	3	1	25.021	1.6801	11.8	3	3	2	1.4662	8.6	2	3	2	5.1271	14	2	2	2		0.559			0.924			1.693		1.65295		3.02862		1.83225
CSA007996.1	protein transport protein Sec61 subunit alpha-like	3	3	52.002	-2	18.5	9	18	1	6.8538	23.8	11	20	1	2.0645	23.2	10	22	1	1.098	1.195	1.158	1.006	0.977	1.039	0.859	0.755	0.74	0.875688	0.0129112	0.682121	0.00145896	0.778954	0.00581671
CSA007997.1	probable alpha,alpha-trehalose-phosphate synthase	3	3	96.273	40.68	12.5	7	9	6	70.822	21.3	10	11	9	78.555	19.5	10	12	8	0.881	0.921	0.882	1.329	1.206	1.342	0.81	0.867	0.786	1.44449	0.000927498	0.91766	0.0547074	0.635285	0.000681421
CSA008008.1	anthranilate phosphoribosyltransferase	1	0	25.423	3.0659	5.3	1	1	1
CSA008015.1	mediator of RNA polymerase II transcription subunit 12	3	3	173.42	196.34	16	19	26	19	177.47	16.1	18	24	18	152.72	17.5	18	23	18	1.383	1.368	1.376	0.741	0.697	0.77	0.804	0.823	0.791	0.535013	7.82665e-06	0.585898	6.28099e-07	1.09511	0.0390994
CSA008016.1	tubulin beta-2 chain-like	3	3	37.152	3.5642	54.3	15	45	1	28.12	54	14	53	1	23.933	54	14	51	1	1.302	1.843	1.878	0.784	0.428	0.459	0.815	0.452	0.369	0.33267	0.00691147	0.325702	0.008158	0.979054	0.950912
CSA008023.1	3-oxoacyl-[acyl-carrier-protein] synthase 3 A, chloroplastic	3	3	42.379	105.48	30.2	8	12	6	71.614	30.2	8	10	6	97.083	28.5	7	10	7	1.15	1.065	1.04	1.031	1.005	1.012	0.77	0.937	0.957	0.936406	0.113707	0.818433	0.0442297	0.874016	0.09899
CSA008024.1	probable methyltransferase PMT15	1	0	72.434	1.4453	1.9	1	1	1
CSA008025.1	COP9 signalosome complex subunit 1	3	2	50.276	16.88	12.9	5	6	1	53.554	10	4	6	4	44.028	14.1	5	9	2		1.104	1.083		0.999	0.862		0.862	1.034	0.850937	0.142983	0.866941	0.235087	1.01881	0.888157
[truncated: 7,099 more rows]
