# Supplementary material for: Proteome and Acetyl-Proteome Profiling of Camellia sinensis cv. ‘Anji Baicha’ during Periodic Albinism Reveals Alterations in Photosynthetic and Secondary Metabolite Biosynthetic Pathways
Source: Front Plant Sci. 2017 Dec 11;8:2104. doi: 10.3389/fpls.2017.02104 (PMC5732353; doi:10.3389/fpls.2017.02104)
Supplement: Table S2 — DAPs in photosynthesis and carbon fixation pathways. [file Table2.XLSX]

## Sheet: Sheet1
Protein accession	Gene name	S2/S1 Ratio	S2/S1 P value	S3/S1 Ratio	S3/S1 P value	S3/S2 Ratio	S3/S2 P value
Photosynthesis
CSA027312.1	psaE; photosystem I subunit IV	1.34194	0.0362869	3.2915	0.000143869	2.4528	8.55921e-05
CSA000107.1	psaF; photosystem I subunit III	1.23833	1.30972e-05	2.48219	1.18234e-05	2.00446	2.34356e-05
CSA016522.1	psaG; photosystem I subunit V	1.60643	0.0130286	4.29571	0.000288511	2.67408	0.000660182
CSA006075.1	psaL; photosystem I subunit XI	1.26358	0.0149765	3.25202	5.34688e-05	2.57365	7.73333e-05
CSA033864.1	psaN; photosystem I subunit PsaN	1.241	0.12867	6.05188	1.30699e-05	4.8766	1.82844e-05
CSA005888.1	psb27; photosystem II Psb27 protein	1.43033	0.000156199	3.11944	5.53724e-07	2.18093	1.40001e-06
CSA006922.1	psbC; photosystem II CP43 chlorophyll apoprotein	1.27827	0.00237054	2.63158	5.47971e-05	2.0587	7.39458e-05
CSA006934.1	psbC; photosystem II CP43 chlorophyll apoprotein	1.22793	0.0593684	3.51451	3.03922e-05	2.86214	2.17059e-05
CSA006923.1	psbD; photosystem II P680 reaction center D2 protein [EC:1.10.3.9]	1.34099	0.0371396	2.4732	0.00166809	1.84431	0.00300472
CSA015352.1	psbD; photosystem II P680 reaction center D2 protein [EC:1.10.3.9]	1.49678	0.185839	3.69201	0.0118971	2.46664	0.0209057
CSA000627.1	psbO; photosystem II oxygen-evolving enhancer protein 1	1.322	0.000141947	3.59951	4.21151e-07	2.72277	4.95742e-07
CSA035603.1	psbO; photosystem II oxygen-evolving enhancer protein 1	1.40568	1.3063e-05	2.32911	1.02437e-07	1.65693	6.59972e-07
CSA011430.1	psbP; photosystem II oxygen-evolving enhancer protein 2	1.48669	0.0051181	2.58935	0.000427212	1.74169	0.000888229
CSA033259.1	psbP; photosystem II oxygen-evolving enhancer protein 2	1.43923	0.00124852	3.28761	8.46901e-06	2.28428	3.50488e-05
CSA026004.1	psbQ; photosystem II oxygen-evolving enhancer protein 3	1.38378	0.000608168	4.63939	2.31086e-08	3.35269	2.9428e-07
CSA004909.1	psbR; photosystem II 10kDa protein	1.57613	0.000149133	4.47511	2.73921e-06	2.83929	3.91291e-06
CSA013374.1	psbS; photosystem II 22kDa protein	1.93407	4.91229e-05	3.20362	1.29482e-06	1.65642	6.90555e-06
CSA020312.1	ATPF0A; F-type H+-transporting ATPase subunit a	1.24177	0.0915159	1.65949	0.0412957	1.33639	0.0671115
CSA002065.1	ATPF1A; F-type H+-transporting ATPase subunit alpha [EC:3.6.3.14]	1.48873	0.0119832	2.32992	0.00097773	1.56504	0.00200496
CSA009759.1	ATPF0B; F-type H+-transporting ATPase subunit b	2.31041	7.31434e-07	6.0086	1.39019e-07	2.60066	6.14736e-07
CSA035765.1	ATPF0B; F-type H+-transporting ATPase subunit b	2.09572	1.34303e-06	5.07557	5.69556e-09	2.42188	2.462e-08
CSA036932.1	ATPF1B; F-type H+-transporting ATPase subunit beta [EC:3.6.3.14]	1.64185	4.36275e-05	3.27508	7.11185e-07	1.99475	7.23634e-07
CSA015733.1	ATPF1D; F-type H+-transporting ATPase subunit delta	2.08696	7.32652e-06	5.31969	2.07106e-07	2.54902	7.14565e-07
CSA036933.1	ATPF1E; F-type H+-transporting ATPase subunit epsilon	1.84183	0.000631477	3.41895	0.000107045	1.85628	0.000297548
CSA001404.1	ATPF1G; F-type H+-transporting ATPase subunit gamma	1.95789	0.000248255	4.90283	8.93129e-07	2.50414	7.83302e-09
CSA029276.1	ATPF1G; F-type H+-transporting ATPase subunit gamma	2.30787	0.000102857	3.92985	3.91441e-05	1.7028	0.000539616
CSA013672.1	petA; apocytochrome f	1.3416	0.0302958	3.04735	0.000233875	2.27143	0.000199651
CSA035815.1	petC; cytochrome b6-f complex iron-sulfur subunit [EC:1.10.9.1]	1.57357	0.0652916	3.399	0.00370753	2.16006	0.0050307
CSA022661.1	petE; plastocyanin	1.47821	0.000225152	2.82683	1.04316e-05	1.91233	4.36582e-05
CSA004618.1	petF; ferredoxin	0.891141	0.00782165	0.535129	0.000341606	0.600499	0.00117234
CSA010664.1	petF; ferredoxin	2.24062	8.09185e-05	3.55131	1.20192e-05	1.58497	6.06107e-05
CSA025110.1	petH; ferredoxin--NADP+ reductase [EC:1.18.1.2]	2.88539	3.26836e-06	4.37445	1.81934e-05	1.51607	0.000357747
CSA024064.1	LHCA1; light-harvesting complex I chlorophyll a/b binding protein 1	1.33777	0.0206753	3.94614	5.99975e-05	2.9498	0.000144026
CSA011328.1	LHCA2; light-harvesting complex I chlorophyll a/b binding protein 2	1.47508	0.000148455	3.75469	1.28666e-06	2.54541	1.93185e-06
CSA020482.1	LHCA2; light-harvesting complex I chlorophyll a/b binding protein 2	1.13785	0.3771	1.99291	0.0209483	1.75146	0.0283018
CSA016587.1	LHCA3; light-harvesting complex I chlorophyll a/b binding protein 3	1.31911	0.000361306	3.43089	2.19287e-07	2.60091	5.78435e-07
CSA032834.1	LHCA4; light-harvesting complex I chlorophyll a/b binding protein 4	1.37574	0.00512956	3.8518	1.66008e-05	2.79981	1.84506e-05
CSA008917.1	LHCB1; light-harvesting complex II chlorophyll a/b binding protein 1	1.44382	0.00630834	5.49798	4.43678e-06	3.80795	4.37039e-06
CSA030474.1	LHCB1; light-harvesting complex II chlorophyll a/b binding protein 1	1.17823	0.0519831	2.50624	1.40132e-06	2.12712	2.25752e-05
CSA030476.1	LHCB1; light-harvesting complex II chlorophyll a/b binding protein 1	1.63112	0.000378748	4.48649	2.29153e-06	2.75056	1.93856e-06
CSA035910.1	LHCB1; light-harvesting complex II chlorophyll a/b binding protein 1	1.15813	0.0094183	3.09807	4.71667e-06	2.67507	3.75005e-06
CSA019572.1	LHCB2; light-harvesting complex II chlorophyll a/b binding protein 2	1.2144	0.00332844	2.83718	1.05157e-05	2.33628	1.21585e-05
CSA002361.1	LHCB3; light-harvesting complex II chlorophyll a/b binding protein 3	1.31971	0.00158432	2.56389	2.55725e-05	1.94277	7.30478e-05
CSA016997.1	LHCB3; light-harvesting complex II chlorophyll a/b binding protein 3	1.1188	0.0499816	1.66817	0.000861617	1.49103	0.00100102
CSA010862.1	LHCB4; light-harvesting complex II chlorophyll a/b binding protein 4	1.5573	0.000108777	4.43132	5.9228e-07	2.84552	1.37566e-06
CSA014653.1	LHCB4; light-harvesting complex II chlorophyll a/b binding protein 4	0.9176	0.036248	1.8052	2.43138e-06	1.96731	1.22145e-06
CSA004532.1	LHCB5; light-harvesting complex II chlorophyll a/b binding protein 5	1.48173	0.000108125	4.52339	8.77158e-06	3.05279	1.62515e-05
CSA003567.1	LHCB7; light-harvesting complex II chlorophyll a/b binding protein 7	0.856793	0.0712238	1.93023	0.00236348	2.25286	0.00318058
Carbon fixation in photosynthetic organisms
CSA005116.1	ALDO; fructose-bisphosphate aldolase, class I [EC:4.1.2.13]	2.64119	0.000140704	6.73567	1.01749e-05	2.55024	2.28e-05
CSA009966.1	ALDO; fructose-bisphosphate aldolase, class I [EC:4.1.2.13]	1.74752	1.86479e-06	3.13337	2.73752e-07	1.79304	7.74e-07
CSA011908.1	ALDO; fructose-bisphosphate aldolase, class I [EC:4.1.2.13]	0.755688	0.000265062	0.582611	8.06593e-06	0.770968	0.00103
CSA035207.1	ALDO; fructose-bisphosphate aldolase, class I [EC:4.1.2.13]	0.65933	1.31133e-05	0.487244	6.64743e-06	0.738998	0.000513
CSA001133.1	E1.1.1.40; malate dehydrogenase (oxaloacetate-decarboxylating)(NADP+) [EC:1.1.1.40]	0.363043	0.000151501	0.429625	0.000284406	1.1834	0.123
CSA004180.1	E1.1.1.40; malate dehydrogenase (oxaloacetate-decarboxylating)(NADP+) [EC:1.1.1.40]	0.716061	1.45698e-05	0.384109	1.84229e-06	0.536419	4.92e-06
CSA009025.1	E1.1.1.40; malate dehydrogenase (oxaloacetate-decarboxylating)(NADP+) [EC:1.1.1.40]	2.07185	2.88448e-06	2.43227	2.21832e-07	1.17396	0.000234
CSA018763.1	E1.1.1.40; malate dehydrogenase (oxaloacetate-decarboxylating)(NADP+) [EC:1.1.1.40]	0.637658	0.000236698	0.284584	5.31194e-05	0.446296	0.000458
CSA024830.1	E1.1.1.40; malate dehydrogenase (oxaloacetate-decarboxylating)(NADP+) [EC:1.1.1.40]	2.03929	0.0153444	2.89336	0.0126472	1.41881	0.038
CSA017616.1	E1.1.1.82; malate dehydrogenase (NADP+) [EC:1.1.1.82]	2.12005	1.96749e-05	2.36247	1.68252e-05	1.11435	0.00192
CSA001665.1	E2.2.1.1; transketolase [EC:2.2.1.1]	1.11699	0.045713	2.23584	1.65995e-05	2.00168	5.41e-05
CSA005629.1	E2.2.1.1; transketolase [EC:2.2.1.1]	0.591941	0.040579	0.514042	0.0364015	0.868399	0.552
CSA012532.1	E2.2.1.1; transketolase [EC:2.2.1.1]	1.58806	3.10584e-06	2.89745	1.13515e-06	1.82452	3.99e-06
CSA028009.1	E3.1.3.37; sedoheptulose-bisphosphatase [EC:3.1.3.37]	1.60254	0.0601606	7.03223	5.1264e-05	4.38818	0.000159
CSA034492.1	E3.1.3.37; sedoheptulose-bisphosphatase [EC:3.1.3.37]	2.28664	2.23074e-05	3.54526	4.1539e-05	1.55042	0.000451
CSA028217.1	E4.1.1.49; phosphoenolpyruvate carboxykinase (ATP) [EC:4.1.1.49]	1.38092	0.000768969	0.792809	0.00200916	0.574117	0.000158
CSA028219.1	E4.1.1.49; phosphoenolpyruvate carboxykinase (ATP) [EC:4.1.1.49]	1.41021	3.49184e-05	0.709274	0.000852664	0.502956	3.47e-05
CSA028330.1	E4.1.1.49; phosphoenolpyruvate carboxykinase (ATP) [EC:4.1.1.49]	0.492152	0.0032127	0.419283	0.00330142	0.851936	0.344
CSA017654.1	FBP; fructose-1,6-bisphosphatase I [EC:3.1.3.11]	2.12339	5.13683e-06	4.1673	3.2223e-07	1.96257	9.46e-07
CSA030111.1	FBP; fructose-1,6-bisphosphatase I [EC:3.1.3.11]	2.35631	1.59478e-06	3.20751	4.8851e-08	1.36124	6.36e-06
CSA030555.1	FBP; fructose-1,6-bisphosphatase I [EC:3.1.3.11]	1.62361	0.000150803	2.1307	1.07813e-05	1.31232	0.000202
CSA018950.1	GAPA; glyceraldehyde-3-phosphate dehydrogenase (NADP+) (phosphorylating) [EC:1.2.1.13]	1.99357	0.000183088	4.76145	7.73021e-06	2.3884	2.38e-05
CSA026796.1	GAPA; glyceraldehyde-3-phosphate dehydrogenase (NADP+) (phosphorylating) [EC:1.2.1.13]	2.23594	1.47377e-05	4.35234	1.80481e-06	1.94654	6.18e-06
CSA016761.1	GAPDH; glyceraldehyde 3-phosphate dehydrogenase [EC:1.2.1.12]	0.509977	0.0021459	0.167867	7.69321e-05	0.329165	0.003
CSA023938.1	GAPDH; glyceraldehyde 3-phosphate dehydrogenase [EC:1.2.1.12]	0.392895	4.63138e-05	0.379231	4.47335e-05	0.965222	0.602
CSA000918.1	GGAT; glutamate--glyoxylate aminotransferase [EC:2.6.1.4 2.6.1.2 2.6.1.44]	1.86101	8.19084e-06	2.95264	9.35953e-06	1.58658	6.82e-05
CSA024921.1	GGAT; glutamate--glyoxylate aminotransferase [EC:2.6.1.4 2.6.1.2 2.6.1.44]	1.70896	2.87359e-05	3.21269	5.43776e-06	1.87991	2.03e-05
CSA021592.1	MDH1; malate dehydrogenase [EC:1.1.1.37]	0.964418	0.233372	0.53914	0.000131016	0.559032	0.000254
CSA009850.1	MDH2; malate dehydrogenase [EC:1.1.1.37]	1.77478	0.000234615	2.66041	3.02956e-05	1.49901	9.22e-05
CSA028965.1	MDH2; malate dehydrogenase [EC:1.1.1.37]	1.32403	0.0405825	1.58351	0.00968369	1.19597	0.0654
CSA014917.1	PGK; phosphoglycerate kinase [EC:2.7.2.3]	0.612012	5.34466e-05	0.601368	6.56844e-05	0.982609	0.542
CSA005645.1	ppc; phosphoenolpyruvate carboxylase [EC:4.1.1.31]	1.47341	0.000184758	2.95655	4.42655e-06	2.0066	1.67e-05
CSA011564.1	ppc; phosphoenolpyruvate carboxylase [EC:4.1.1.31]	0.849367	0.081807	0.621519	0.0306882	0.731744	0.0486
CSA030673.1	ppdK; pyruvate, orthophosphate dikinase [EC:2.7.9.1]	1.62737	0.00113671	5.46908	6.26218e-06	3.36069	1.05e-05
CSA000795.1	PRK; phosphoribulokinase [EC:2.7.1.19]	1.84322	1.05652e-06	3.64622	1.62053e-07	1.97818	7.16e-07
CSA020605.1	rbcL; ribulose-bisphosphate carboxylase large chain [EC:4.1.1.39]	2.68603	2.06517e-05	6.19572	5.25794e-06	2.30664	1.95e-05
CSA036938.1	rbcL; ribulose-bisphosphate carboxylase large chain [EC:4.1.1.39]	1.98031	1.2935e-06	3.97447	6.76415e-07	2.007	2.77e-06
CSA004763.1	rbcS; ribulose-bisphosphate carboxylase small chain [EC:4.1.1.39]	2.05188	0.000156082	4.58101	4.09664e-06	2.23259	3.5e-06
CSA020587.1	rbcS; ribulose-bisphosphate carboxylase small chain [EC:4.1.1.39]	2.28127	1.41501e-05	2.46667	1.20817e-05	1.08127	0.017
CSA022807.1	rpe; ribulose-phosphate 3-epimerase [EC:5.1.3.1]	1.75309	0.00015544	2.58436	3.54127e-05	1.47417	0.000133
CSA001723.1	rpiA; ribose 5-phosphate isomerase A [EC:5.3.1.6]	2.04274	1.29501e-05	4.07222	1.32356e-06	1.99351	5.14e-06
CSA003118.1	TPI; triosephosphate isomerase (TIM) [EC:5.3.1.1]	1.45047	0.000194257	1.53922	0.00161733	1.06119	0.318
CSA015603.1	TPI; triosephosphate isomerase (TIM) [EC:5.3.1.1]	1.49782	2.29657e-05	1.99321	1.7825e-05	1.33074	0.000207
