# Supplementary material for: Proteome and Acetyl-Proteome Profiling of Camellia sinensis cv. ‘Anji Baicha’ during Periodic Albinism Reveals Alterations in Photosynthetic and Secondary Metabolite Biosynthetic Pathways
Source: Front Plant Sci. 2017 Dec 11;8:2104. doi: 10.3389/fpls.2017.02104 (PMC5732353; doi:10.3389/fpls.2017.02104)
Supplement: Table S3 — DAPs in theanine and flavonoid biosynthetic pathways. [file Table3.XLSX]

## Sheet: Sheet1
Protein accession	Gene name	S2/S1 Ratio	S2/S1 P value	S3/S1 Ratio	S3/S1 P value	S3/S2 Ratio	S3/S2 P value
Theanine biosynthesis pathway
CSA001114.1	GS; glutamine synthetase [EC:6.3.1.2]	2.048	2.87e-05	3.070	1.04e-05	1.499	6.71e-05
CSA006044.1	GS; glutamine synthetase [EC:6.3.1.2]	0.647	8.45e-05	0.396	1.75e-05	0.612	5.53e-05
CSA010785.1	GS; glutamine synthetase [EC:6.3.1.2]	1.311	0.000132	2.411	1.7e-06	1.839	3.08e-06
CSA003654.1	E1.4.7.1; glutamate synthase (ferredoxin) [EC:1.4.7.1]	2.000	4.56e-06	3.784	8e-08	1.892	3e-07
CSA009695.1	GDH; glutamate dehydrogenase (NAD(P)+) [EC:1.4.1.3]	1.268	0.00145	2.790	1.12e-05	2.200	2.21e-05
CSA011735.1	GDH; glutamate dehydrogenase (NAD(P)+) [EC:1.4.1.3]	0.962	0.648	0.643	0.0145	0.669	0.0316
CSA019055.1	GDH; glutamate dehydrogenase (NAD(P)+) [EC:1.4.1.3]	0.579	0.000153	0.562	0.000108	0.970	0.578
CSA032992.1	GDH; glutamate dehydrogenase (NAD(P)+) [EC:1.4.1.3]	0.624	0.0149	0.436	0.0106	0.698	0.0501
CSA000918.1	ALT; GGAT; glutamate--glyoxylate aminotransferase [EC:2.6.1.4 2.6.1.2 2.6.1.44]	1.861	8.19e-06	2.953	9.36e-06	1.587	6.82e-05
CSA024921.1	ALT; GGAT; glutamate--glyoxylate aminotransferase [EC:2.6.1.4 2.6.1.2 2.6.1.44]	1.709	2.87e-05	3.213	5.44e-06	1.880	2.03e-05
Flavonoid biosynthesis pathway
CSA016076.1	PAL; phenylalanine ammonia-lyase [EC:4.3.1.24]	0.266	4.68e-06	0.296	6.71e-06	1.112	0.341
CSA023534.1	PAL; phenylalanine ammonia-lyase [EC:4.3.1.24]	0.368	1.17e-05	0.354	2.58e-05	0.961	0.521
CSA028450.1	PAL; phenylalanine ammonia-lyase [EC:4.3.1.24]	0.507	0.000714	0.518	0.000823	1.022	0.818
CSA032883.1	PAL; phenylalanine ammonia-lyase [EC:4.3.1.24]	0.642	0.000187	0.556	8.65e-05	0.865	0.0205
CSA022101.1	C4H; CYP73A; trans-cinnamate 4-monooxygenase [EC:1.14.13.11]	0.578	2.71e-05	0.506	2.69e-05	0.876	0.00947
CSA003473.1	4CL; 4-coumarate--CoA ligase [EC:6.2.1.12]	1.319	1.79e-05	1.634	4.8e-07	1.239	9.74e-06
CSA007753.1	4CL; 4-coumarate--CoA ligase [EC:6.2.1.12]	0.626	8.98e-05	0.531	9.94e-05	0.849	0.0137
CSA036366.1	4CL; 4-coumarate--CoA ligase [EC:6.2.1.12]	0.632	0.0299	0.575	0.0345	0.910	0.602
CSA024718.1	CHS; chalcone synthase [EC:2.3.1.74]	0.300	0.00073	0.371	0.00162	1.236	0.368
CSA008261.1	E5.5.1.6; chalcone isomerase [EC:5.5.1.6]	0.601	0.00212	0.646	0.0141	1.076	0.537
CSA008262.1	E5.5.1.6; chalcone isomerase [EC:5.5.1.6]	0.586	0.0022	0.648	0.00337	1.107	0.249
CSA023536.1	E5.5.1.6; chalcone isomerase [EC:5.5.1.6]	0.598	4.12e-05	0.606	0.000142	1.014	0.816
CSA004930.1	F3H; E1.14.11.9; naringenin 3-dioxygenase [EC:1.14.11.9]	0.417	2.18e-07	0.574	1.37e-07	1.375	6.09e-05
CSA003707.1	FLS; flavonol synthase [EC:1.14.11.23]	0.348	2.09e-06	0.373	1.73e-06	1.070	0.11
CSA006950.1	FLS; flavonol synthase [EC:1.14.11.23]	0.975	0.275	0.456	5.31e-05	0.468	5.26e-05
CSA011508.1	ANS; leucoanthocyanidin dioxygenase [EC:1.14.11.19]	0.292	7.44e-07	0.342	1.45e-05	1.171	0.0913
CSA035767.1	ANS; leucoanthocyanidin dioxygenase [EC:1.14.11.19]	0.416	1.94e-05	0.483	9.94e-06	1.161	0.0592
CSA011986.1	ANR; anthocyanidin reductase [EC:1.3.1.77]	0.460	0.000105	0.547	0.000179	1.188	0.0124
