# Supplementary material for: Proteome and Acetyl-Proteome Profiling of Camellia sinensis cv. ‘Anji Baicha’ during Periodic Albinism Reveals Alterations in Photosynthetic and Secondary Metabolite Biosynthetic Pathways
Source: Front Plant Sci. 2017 Dec 11;8:2104. doi: 10.3389/fpls.2017.02104 (PMC5732353; doi:10.3389/fpls.2017.02104)
Supplement: Table S4 — Identified lysine-acetylated proteins at three stages of ‘Anji Baicha’ leaf development. [file Table4.XLSX]

## Sheet: Summary
Header line description of table 1			Table 1. MS/MS spetrum database search analysis summary
Total spectrums	Number of spectrums produced by mass spectrometer
Matched spetrums	Number of spectrums matched with alignment protein		Exp.	Total spectrums	Matched spetrums	Peptides	Modified peptides	Identified modified proteins	Quantifiable modified proteins	Identified modification sites	Quantifiable modification sites
Peptides	Number of peptides whitch spetrums hit		Exp.1	70965	6838	4081	3147	1768	1611	3214	2886
Modified peptides	Total number of modified peptides identified		Exp.2	71995	6995	4343	2971	1705	1551	3025	2717
Identified modified proteins	Number of proteins detected by spetrum search analysis		Exp.3	66618	7781	4677	3777	2108	1935	3858	3513
Quantifiable modified proteins	Number of proteins quantifiable		Total	209578	21614	13101	9895	2649	2408	5300	4788
Identified modification sites	Number of modification sites detected by spetrum search analysis		At least in two Exp.					1752	1612	3161	2869
Quantifiable modification sites	Number of modification sites quantifiable
Header line description of worksheet "Quant"
Protein accession	Protein accession number of database used for search
Position	Modification site localization in protein
Amino acid	The amino acid that modification site modified
Protein description	Protein functional description
Gene name	Indicates the name of the gene that code for the protein sequence
Localization probability	Probability of a certain amino acid containing this modification in this peptide
PEP	The maximal posterior error probability for peptides, which is the probability of each peptide to be a false hit considering identification score and peptide length
Score	A simple rule to be used to judge whether a result is significant or not
Modified sequence	Identified peptide sequence marked with modification sites localization probabilities
Charge	Carried charge of peptide
Mass error [ppm]	Parts per million ratio of peptide mass error between the theory and practice
MS/MS Count	Number of spectrum matched with peptide
Header line description of worksheet "pep_quant"
ID	Identified peptide index number
Sequence	Identified peptide amino acid sequence
Length	Identified peptide amino acid length
Modifications	identified peptide with modification markers
Modified sequence	Identified peptide sequence marked with modification sites localization probabilities
Protein accession	Protein accession number of database used for search
Protein description	Protein functional description
Charge	Carried charge of peptide
m/z	Mass-to-charge ratio of peptide
Mass error [ppm]	Parts per million ratio of peptide mass error between the theory and practice
PEP	The maximal posterior error probability for peptides, which is the probability of each peptide to be a false hit considering identification score and peptide length
Score	A simple rule to be used to judge whether a result is significant or not
MS/MS Count	Number of spectrum matched with peptide

## Sheet: Qaunt
Identified acetylation sites information						Replicate 1							Replicate 2							Replicate 3							Acetylation quantitation of S1			Acetylation quantitation of S2			Acetylation quantitation of S3			Protein quantitation of S1			Protein quantitation of S2			Protein quantitation of S3			Normalized acetyl of S1			Normalized acetyl of S2
Protein accession	Position	Amino acid	Protein description	Times of identified	Times of quant	Localization probability	PEP	Score	Modified sequence	Charge	Mass error [ppm]	MS/MS Count	Localization probability	PEP	Score	Modified sequence	Charge	Mass error [ppm]	MS/MS Count	Localization probability	PEP	Score	Modified sequence	Charge	Mass error [ppm]	MS/MS Count	Rep.1	Rep.2	Rep.3	Rep.1	Rep.2	Rep.3	Rep.1	Rep.2	Rep.3	Rep.1	Rep.2	Rep.3	Rep.1	Rep.2	Rep.3	Rep.1	Rep.2	Rep.3	Rep.1	Rep.2	Rep.3	Rep.1	Rep.2
CSA000011.1	61	K	sucrose synthase	3	3	1	0.000114584	75.376	HAQQK(1)LHDGPFGEVLK	4	0.55022	1	1	8.07083e-23	153.22	HAQQK(1)LHDGPFGEVLK	3	0.2918	3	1	3.35947e-13	125.98	HAQQK(1)LHDGPFGEVLK	4	0.23735	2	1.442	1.239	1.215	0.749	0.843	0.786	0.539	0.835	0.907	1.501	1.587	1.588	0.777	0.754	0.751	0.495	0.443	0.478	0.960693	0.780718	0.765113	0.963964	1.11804
CSA000011.1	451	K	sucrose synthase	3	3	1	5.85784e-05	96.866	TKYPDSDIYWK(1)K	3	-1.3324	1	1	2.18551e-05	114.7	YPDSDIYWK(1)K	2	-1.1684	3	1	0.00139724	79.639	TKYPDSDIYWK(1)K	3	0.96699	1	1.712	1.659	1.499	0.572	0.652	0.688	0.235	0.293	0.447	1.501	1.587	1.588	0.777	0.754	0.751	0.495	0.443	0.478	1.14057	1.04537	0.943955	0.736165	0.864721
CSA000011.1	625	K	sucrose synthase	3	3	1	2.95299e-10	151.26	ESKDLEEQAEMK(1)K	3	0.29449	6	1	0.00010864	128.85	DLEEQAEMK(1)K	3	-0.89394	5	1	1.67232e-11	174.42	ESKDLEEQAEMK(1)K	3	0.12595	5	1.596	1.469	1.517	0.646	0.738	0.7	0.365	0.539	0.394	1.501	1.587	1.588	0.777	0.754	0.751	0.495	0.443	0.478	1.06329	0.925646	0.95529	0.831403	0.97878
CSA000036.1	364	K	pyrophosphate-energized vacuolar membrane proton pump-like	3	3	1	0.00636836	88.495	DIEPTLK(1)K	2	-0.94427	3	1	0.00270984	100.02	DIEPTLK(1)K	2	-0.63758	3	1	0.003168	98.044	DIEPTLK(1)K	2	-0.31274	3	0.864	0.848	0.787	1.165	1.207	1.361	1.15	1.123	1.052	0.706	0.72	0.727	1.234	1.242	1.261	1.175	1.108	1.07	1.2238	1.17778	1.08253	0.944084	0.97182
CSA000072.1	90	K	SWR1-complex protein 4	3	3	1	5.17677e-16	157.09	LSDAPSSPAQSNK(1)R	2	0.76422	2	1	6.19071e-59	222.75	LSDAPSSPAQSNK(1)R	3	1.9215	2	1	3.08358e-18	180.95	LSDAPSSPAQSNK(1)R	3	0.66316	2	1.375	1.466	1.33	0.642	0.641	0.674	0.8	0.658	0.813
CSA000076.1	52	K	uncharacterized protein LOC105159847	3	3	1	0.000239065	123.51	LEAAISTK(1)K	2	0.92524	2	1	0.000879525	119.53	LEAAISTK(1)K	3	0.85692	2	1	0.000595303	120.06	LEAAISTK(1)K	2	0.43537	2	1.14	1.2	1.204	0.922	0.9	0.878	0.915	0.839	0.813	1.205	1.186	1.183	0.882	0.883	0.883	0.893	0.911	0.873	0.946058	1.0118	1.01775	1.04535	1.01925
CSA000076.1	91	K	uncharacterized protein LOC105159847	3	3	1	0.0118924	82.417	AIEEIEK(1)LR	2	-2.0958	1	1	0.00536156	80.102	AIEEIEK(1)LR	2	-1.5448	1	1	0.00808845	77.744	AIEEIEK(1)LR	2	-1.0159	1	0.925	0.97	1.004	1.02	0.988	0.963	1.212	1.156	1.116	1.205	1.186	1.183	0.882	0.883	0.883	0.893	0.911	0.873	0.767635	0.817875	0.84869	1.15646	1.11891
CSA000101.1	217	K	signal recognition particle 54 kDa protein, chloroplastic	3	3	1	0.00332824	108.24	LAFYLK(1)K	2	0.80475	2	1	0.00321874	110.61	LAFYLK(1)K	2	0.53941	1	1	0.00351249	110.61	LAFYLK(1)K	2	1.4442	2	0.921	0.887	0.893	1.399	1.452	1.404	0.755	0.764	0.78	0.77	0.775	0.776	1.288	1.301	1.291	0.945	0.965	0.937	1.1961	1.14452	1.15077	1.08618	1.11606
CSA000107.1	124	K	photosystem I reaction center subunit III, chloroplastic-like	3	3	1	0.0330356	58.23	ATMEK(1)TSR	2	0.96939	1	1	0.006043	93.556	ATMEK(1)TSR	2	0.45896	2	1	0.000563506	125.71	ATMEK(1)TSR	2	-0.33171	1	0.513	0.565	0.584	0.965	0.969	1.003	2.073	1.91	1.93	0.671	0.667	0.655	0.823	0.816	0.829	1.585	1.65	1.712	0.764531	0.847076	0.891603	1.17254	1.1875
CSA000223.1	48	K	lysine--tRNA ligase-like	3	3	1	0.00425571	92.051	FELFVNK(1)R	2	-0.90224	2	1	0.0013467	107.69	FELFVNK(1)R	2	-0.51264	2	1	9.87112e-05	137.84	FELFVNK(1)R	2	-0.57422	2	1.104	1.132	1.193	1.063	1.033	1.131	0.81	0.809	0.509
CSA000231.1	154	K	haloacid dehalogenase-like hydrolase domain-containing protein At3g48420	3	3	1	0.00596988	103.88	APK(1)SEEERK	3	0.45792	2	1	0.0301287	74.841	APK(1)SEEER	2	-1.7291	1	1	0.0419779	67.113	APK(1)SEEER	2	-0.98794	1	0.573	0.303	0.271	0.963	0.869	0.949	1.96	2.505	2.642	0.37	0.428	0.407	0.786	0.829	0.837	2.116	1.958	1.972	1.54865	0.707944	0.665848	1.22519	1.04825
CSA000231.1	168	K	haloacid dehalogenase-like hydrolase domain-containing protein At3g48420	3	3	1	0.000428115	106.18	QFIASLHK(1)R	3	-1.3543	3	1	0.00066464	95.483	QFIASLHK(1)R	3	-1.1932	2	1	0.000227448	112.11	QFIASLHK(1)R	3	-1.8118	2	0.93	0.808	0.761	0.981	1.089	1.097	1.249	1.332	1.446	0.37	0.428	0.407	0.786	0.829	0.837	2.116	1.958	1.972	2.51351	1.88785	1.86978	1.24809	1.31363
CSA000238.1	287	K	uncharacterized protein LOC104598575	3	3	1	0.0104097	84.198	SK(1)LMAAAVR	2	-1.2949	1	1	0.00374657	102.53	SK(1)LMAAAVR	2	-2.4544	1	1	0.00710217	79.659	SK(1)LMAAAVR	2	-1.5308	2	0.87	0.847	0.682	1.379	1.408	1.605	0.878	0.889	0.957	0.981	0.961	0.985	1.096	1.041	1.15	0.9	0.953	0.923	0.88685	0.881374	0.692386	1.25821	1.35255
CSA000260.1	96	K	60S ribosomal protein L13a-4	3	3	1	0.00964818	69.598	GMIPHK(1)TK	3	-1.0287	2	1	0.0293337	51.193	GMIPHK(1)TK	3	0.1141	2	1	0.00728556	71.379	GMIPHK(1)TK	3	-0.45528	2	1.287	1.331	1.254	0.799	0.868	0.869	0.778	0.641	0.72	1.33	1.432	1.501	0.933	0.893	0.882	0.599	0.466	0.464	0.967669	0.929469	0.835443	0.856377	0.972004
CSA000260.1	119	K	60S ribosomal protein L13a-4	3	3	1	0.00193727	65.043	AYEGIPPPYDK(1)MK	3	-1.1523	1	1	0.000678884	73.927	AYEGIPPPYDK(1)MK	3	-1.9481	2	1	0.000262732	73.927	AYEGIPPPYDK(1)MK	2	-1.4981	3	1.203	1.252	1.114	0.947	0.928	0.885	0.761	0.711	0.988	1.33	1.432	1.501	0.933	0.893	0.882	0.599	0.466	0.464	0.904511	0.874302	0.742172	1.01501	1.03919
CSA000306.1	74	K	heat shock cognate 70 kDa protein 2-like	3	3	1	3.03567e-134	274.02	NQVAMNPINTVFDAK(1)R	2	-0.63203	6	1	3.48678e-173	297.45	NQVAMNPINTVFDAK(1)R	2	-0.5684	7	1	4.37191e-72	257.16	NQVAMNPINTVFDAK(1)R	2	-0.84471	7	1.276	1.19	1.299	0.912	0.958	0.88	0.662	0.79	0.614	1.591	1.677	1.52	0.766	0.702	0.772	0.41	0.399	0.544	0.802011	0.7096	0.854605	1.1906	1.36467
CSA000306.1	252	K	heat shock cognate 70 kDa protein 2-like	3	3	1	5.77503e-56	226.04	MVNHFVQEFK(1)R	3	-0.2925	10	1	1.95687e-14	165.58	MVNHFVQEFK(1)R	3	0.56662	9	1	1.85541e-21	194.52	MVNHFVQEFK(1)R	3	-1.3717	8	1.103	1.082	1.086	0.998	1	0.961	0.892	0.936	0.949	1.591	1.677	1.52	0.766	0.702	0.772	0.41	0.399	0.544	0.693275	0.6452	0.714474	1.30287	1.4245
CSA000306.1	429	K	heat shock cognate 70 kDa protein 2-like	3	3	1	1.96518e-09	147.75	NTTIPTK(1)K	2	1.3852	8	1	0.0020863	96.342	NTTIPTK(1)K	3	-0.93411	4	1	0.00188961	104.22	NTTIPTK(1)K	2	0.91824	8	1.043	1.105	1.003	0.981	0.956	0.965	1.028	0.946	1.114	1.591	1.677	1.52	0.766	0.702	0.772	0.41	0.399	0.544	0.655563	0.658915	0.659868	1.28068	1.36182
CSA000306.1	504	K	heat shock cognate 70 kDa protein 2-like	3	3	1	0.0224579	91.069	TTGQK(1)NK	2	2.1197	1	1	0.0154898	91.069	TTGQK(1)NK	2	2.5267	2	1	0.016722	91.069	TTGQK(1)NK	2	2.5299	2	0.888	0.893	0.835	0.607	0.634	0.581	1.783	1.707	1.953	1.591	1.677	1.52	0.766	0.702	0.772	0.41	0.399	0.544	0.55814	0.532499	0.549342	0.792428	0.903134
CSA000306.1	506	K	heat shock cognate 70 kDa protein 2-like	3	3	1	3.8358e-06	138.99	NK(1)ITITNDK	2	0.42999	3	1	1.85415e-05	141.71	NK(1)ITITNDK	2	-0.49457	3	1	4.63347e-42	220.82	NK(1)ITITNDK	3	1.3079	2	1.232	1.251	1.293	0.89	0.872	0.892	0.774	0.779	0.611	1.591	1.677	1.52	0.766	0.702	0.772	0.41	0.399	0.544	0.774356	0.745975	0.850658	1.16188	1.24217
CSA000306.1	530	K	heat shock cognate 70 kDa protein 2-like	3	3	1	3.43699e-06	139.86	MVQEAEK(1)YK	2	0.72968	4	1	2.64295e-05	139.86	MVQEAEK(1)YK	2	0.63157	4	1	9.96323e-05	139.86	MVQEAEK(1)YK	2	1.8328	3	1.276	1.326	1.307	0.892	0.886	0.852	0.686	0.626	0.633	1.591	1.677	1.52	0.766	0.702	0.772	0.41	0.399	0.544	0.802011	0.790698	0.859868	1.16449	1.26211
CSA000306.1	532	K	heat shock cognate 70 kDa protein 2-like	3	3	1	0.00392211	73.841	YK(1)SEDEEHK	3	-0.091403	2	1	0.000165809	124.67	YK(1)SEDEEHK	3	0.070968	4	1	0.000251863	110.08	YK(1)SEDEEHKK	4	0.43934	4	1.282	1.317	1.279	0.973	0.936	0.86	0.576	0.585	0.682	1.591	1.677	1.52	0.766	0.702	0.772	0.41	0.399	0.544	0.805783	0.785331	0.841447	1.27023	1.33333
CSA000306.1	539	K	heat shock cognate 70 kDa protein 2-like	3	3	1	0.000117544	117.86	YKSEDEEHK(1)K	3	0.25175	2	1	0.00941644	68.536	SEDEEHK(1)K	3	-2.2232	3	1	0.0013095	89.301	YKSEDEEHK(1)K	3	0.58564	4	1.495	1.423	1.429	0.842	0.879	0.863	0.322	0.459	0.368	1.591	1.677	1.52	0.766	0.702	0.772	0.41	0.399	0.544	0.939661	0.848539	0.940132	1.09922	1.25214
CSA000306.1	540	K	heat shock cognate 70 kDa protein 2-like	3	3	0.975635	9.01658e-05	107.65	YKSEDEEHK(0.024)K(0.976)K	3	-0.90374	2	0.888819	0.00224987	83.948	SEDEEHK(0.111)K(0.889)K	3	-1.3624	1	0.964766	0.000407958	86.772	YKSEDEEHK(0.035)K(0.965)K	4	-1.6909	2	1.442	1.329	1.371	0.877	0.797	0.893	0.383	0.726	0.45	1.591	1.677	1.52	0.766	0.702	0.772	0.41	0.399	0.544	0.906348	0.792487	0.901974	1.14491	1.13533
CSA000306.1	545	K	heat shock cognate 70 kDa protein 2-like	3	3	1	9.15826e-36	178.51	IEAK(1)NALENYAYNMR	3	1.0652	3	1	2.49996e-14	144.38	IEAK(1)NALENYAYNMR	3	2.8662	2	1	3.33083e-15	152.34	IEAK(1)NALENYAYNMR	3	4.2834	1	1.08	1.149	0.829	0.878	0.94	0.96	1.081	0.886	1.481	1.591	1.677	1.52	0.766	0.702	0.772	0.41	0.399	0.544	0.678818	0.685152	0.545395	1.14621	1.33903
CSA000407.1	214	K	elongation factor 1-delta-like	3	3	1	1.39347e-10	156.35	LVPVGYGIK(1)K	3	-0.02157	4	1	3.37842e-07	145.72	LVPVGYGIK(1)K	3	0.59467	4	1	1.32128e-09	163.32	LVPVGYGIK(1)K	2	0.57252	3	1.094	1.079	1.159	0.928	0.919	0.911	0.996	1.039	0.861	1.197	1.188	1.195	0.944	0.939	0.962	0.779	0.785	0.768	0.913952	0.908249	0.969874	0.983051	0.978701
CSA000480.1	156	K	50S ribosomal protein L12, chloroplastic	3	3	1	0.000140906	127.76	ELIEGLPK(1)K	2	-1.1547	2	1	0.00130479	115.78	ELIEGLPK(1)K	2	-0.13286	2	1	0.000297539	127.76	ELIEGLPK(1)K	2	0.40245	2	0.706	0.681	0.617	1.333	1.333	1.374	1.25	1.276	1.387	0.569	0.568	0.607	1.132	1.166	1.151	1.406	1.394	1.379	1.24077	1.19894	1.01647	1.17756	1.14322
CSA000531.1	109	K	20 kDa chaperonin, chloroplastic-like	3	3	1	6.54567e-06	140.16	NK(1)VDISVK	2	1.2104	4	1	0.000817162	123.75	NK(1)VDISVK	2	-1.0684	3	1	0.00116736	115.78	NK(1)VDISVK	2	-1.3743	2	0.918	0.922	0.904	1.128	1.254	1.217	1.09	0.932	0.995	0.849	0.849	0.85	1.095	1.074	1.087	1.113	1.08	1.099	1.08127	1.08598	1.06353	1.03014	1.1676
CSA000531.1	167	K	20 kDa chaperonin, chloroplastic-like	3	2	1	0.00117614	105.65	VLIK(1)VAEAEEK	2	-0.52935	1	1	0.000156917	113.22	VLIK(1)VAEAEEK	3	-0.28542	1	1	0.000122682	113.22	VLIK(1)VAEAEEK	2	-0.24475	2	0.85		0.746	1.053		1.12	1.314		1.446	0.849	0.849	0.85	1.095	1.074	1.087	1.113	1.08	1.099	1.00118		0.877647	0.961644
CSA000602.1	98	K	probable pyridoxal 5'-phosphate synthase subunit PDX1	3	3	1	0.000208017	112.08	QAVTIPVMAK(1)AR	2	-0.40068	2	1	0.000171165	103.35	QAVTIPVMAK(1)AR	2	0.53931	2	1	3.57872e-05	111.72	QAVTIPVMAK(1)AR	2	0.5532	1	0.739	0.796	0.739	1.225	1.127	1.181	1.32	1.307	1.382	0.764	0.881	0.892	1.2	1.076	1.09	1.129	1.083	1.053	0.967277	0.903519	0.828475	1.02083	1.0474
CSA000616.1	326	K	protein QUIRKY	3	2	1	0.0131468	64.654	GVTK(1)HLEK	3	1.6478	1	1	0.0259261	53.751	GVTK(1)HLEK	3	1.7518	1	1	0.0124912	65.224	GVTK(1)HLEK	3	2.1052	1	1.073		0.999	1		1.085	0.948		0.972	1.098	1.05	1.041	0.945	1.014	0.966	0.919	0.975	1.038	0.977231		0.959654	1.0582
CSA000627.1	274	K	oxygen-evolving enhancer protein 1, chloroplastic	3	3	1	0.000297305	86.944	ENIK(1)NTASSTGK	3	-0.42117	2	1	0.000168805	89.231	ENIK(1)NTASSTGK	3	0.24765	2	1	5.23807e-05	107.74	ENIK(1)NTASSTGK	3	0.62776	3	0.743	0.817	0.679	0.869	0.924	0.906	1.747	1.508	1.856	0.53	0.527	0.561	0.72	0.717	0.702	1.954	1.968	1.902	1.40189	1.55028	1.21034	1.20694	1.2887
CSA000657.1	164	K	thioredoxin H-type	3	3	1	0.00731378	60.657	HAAK(1)HAAAPVAVTATA	2	-1.085	1	1	2.67439e-06	84.753	HAAK(1)HAAAPVAVTATA	2	-0.71895	2	1	1.72389e-05	83.633	HAAK(1)HAAAPVAVTATA	2	-0.28883	1	1.069	1.142	0.939	0.878	0.901	0.992	1.103	0.943	1.213	0.998	1.027	1.014	0.993	1.01	1.023	0.966	0.936	0.935	1.07114	1.11198	0.926036	0.884189	0.892079
CSA000683.1	163	K	tubulin alpha-3 chain	3	3	1	0.00604047	89.047	LSLDYGK(1)K	2	1.0204	1	1	0.00584353	90.15	LSLDYGK(1)K	2	0.090093	1	1	0.00257546	100.02	LSLDYGK(1)K	2	-0.2971	1	0.945	0.983	1.021	1.036	1.013	1.078	1.151	1.103	0.935	1.075		0.98	0.921		1.011	0.982		1.015	0.87907		1.04184	1.12486
CSA000793.1	104	K	U1 small nuclear ribonucleoprotein A isoform X2	3	2	1	0.0260271	80.706	TK(1)SDIIAK	2	-0.23136	1	1	0.00775035	90.827	TK(1)SDIIAK	2	0.82404	1	1	0.00660768	93.096	TK(1)SDIIAK	2	1.0992	1		1.292	1.287		0.912	0.915		0.657	0.595	0.974	1.023	1.102	1.02	0.99	1.024	1.087	0.979	0.737		1.26295	1.16788		0.921212
CSA000795.1	207	K	phosphoribulokinase, chloroplastic-like	3	3	1	0.00570717	113.1	FAWK(1)IQR	2	0.79146	2	1	0.0281753	85.265	FAWK(1)IQR	2	0.79758	1	1	0.0319306	81.613	FAWK(1)IQR	2	-0.52327	1	0.332	0.383	0.299	0.949	1.021	0.947	2.444	2.181	2.589	0.492	0.498	0.477	0.89	0.908	0.906	1.758	1.78	1.811	0.674797	0.769076	0.626834	1.06629	1.12445
CSA000797.1	256	K	plastidal glycolate/glycerate translocator 1, chloroplastic-like	3	3	1	0.0363466	73.975	LPAGVK(1)K	2	0.18198	1	1	0.0267175	80.462	LPAGVK(1)K	2	0.95772	1	1	0.0311352	76.035	LPAGVK(1)K	2	0.67434	1	0.526	0.674	0.579	0.956	0.942	0.923	2.059	1.744	2.04	0.528	0.521	0.465	0.888	1.006	0.917	1.775	1.656	1.829	0.996212	1.29367	1.24516	1.07658	0.936382
CSA000838.1	21	K	protein mago nashi homolog	3	3	1	0.00258959	87.323	YYVGHK(1)GK	3	0.7965	1	1	0.00340765	82.671	YYVGHK(1)GK	3	1.2399	1	1	0.00520152	77.058	YYVGHK(1)GK	3	0.60073	1	1.11	1.162	1.157	1.005	1.016	0.978	0.873	0.774	0.779	1.133	1.139	1.157	0.957	0.984	0.998	0.851	0.813	0.785	0.9797	1.02019	1	1.05016	1.03252
CSA000931.1	323	K	cinnamoyl-CoA reductase 1	3	3	1	0.00323219	108.7	ETVESLK(1)SK	3	-0.35556	2	1	0.00336837	72.928	ETVESLK(1)SK	3	-2.6967	1	1	0.00369322	70.908	ETVESLK(1)SK	3	-1.6412	1	0.994	1.051	0.937	1.034	1.106	1.044	1.059	0.87	1.151	0.979	0.944	0.898	0.989	0.949	0.951	1.075	1.145	1.179	1.01532	1.11335	1.04343	1.0455	1.16544
CSA000963.1	74	K	heat shock cognate 70 kDa protein 2-like	3	3	1	1.17746e-96	248.97	NQVAMNPTNTVFDAK(1)R	3	-1.7178	7	1	9.67432e-79	233.12	NQVAMNPTNTVFDAK(1)R	2	-0.67598	6	1	7.27627e-87	263.45	NQVAMNPTNTVFDAK(1)R	2	0.64195	9	1.276	1.238	1.229	0.984	0.995	0.987	0.574	0.66	0.621	0.688	0.703	0.665	0.871	0.879	0.838	1.51	1.507	1.621	1.85465	1.76102	1.84812	1.12974	1.13197
CSA000963.1	334	K	heat shock cognate 70 kDa protein 2-like	3	3	1	7.29186e-28	167.97	MDK(1)SNVDDVVLVGGSTR	2	0.60617	1	1	2.47192e-10	100.97	MDK(1)SNVDDVVLVGGSTR	3	2.587	1	1	2.36256e-09	97.384	MDK(1)SNVDDVVLVGGSTR	2	1.3652	2	0.811	0.912	0.881	1.037	1.119	1.063	1.41	1.107	1.241	0.688	0.703	0.665	0.871	0.879	0.838	1.51	1.507	1.621	1.17878	1.2973	1.32481	1.19059	1.27304
CSA000963.1	539	K	heat shock cognate 70 kDa protein 2-like	3	3	1	0.00203624	76.326	AEDEEHK(1)K	3	0.60352	3	1	0.0109154	49.423	AEDEEHK(1)K	3	-0.78304	2	1	0.000902768	94.122	YKAEDEEHK(1)K	3	2.0436	2	0.825	0.892	0.731	0.901	0.834	0.91	1.547	1.475	1.746	0.688	0.703	0.665	0.871	0.879	0.838	1.51	1.507	1.621	1.19913	1.26885	1.09925	1.03444	0.948805
CSA000992.1	186	K	PI-PLC X-box domain-containing protein DDB_G0293730	3	3	1	0.00148962	103.26	TIAELLPK(1)R	2	-0.60983	1	1	0.002496	105.98	TIAELLPK(1)R	2	-1.2072	1	1	0.00137605	96.143	TIAELLPK(1)R	2	0.54162	1	0.695	0.65	0.609	1.321	1.495	1.42	1.287	1.145	1.344	0.639	0.664	0.701	1.2	1.211	1.165	1.317	1.241	1.235	1.08764	0.978916	0.868759	1.10083	1.23452
CSA001004.1	141	K	uncharacterized protein LOC109182857	3	3	1	0.00715009	82.241	FPNITK(1)R	2	0.35257	2	0.999997	0.00174221	81.565	FLDKFPNITK(1)R	3	-0.95945	1	0.999926	0.0102705	66.004	FLDKFPNITK(1)R	3	-0.33808	1	0.882	0.849	0.828	1.303	1.392	1.314	0.949	0.904	1.029	0.866	0.813	0.836	1.212	1.208	1.223	0.976	0.932	0.967	1.01848	1.04428	0.990431	1.07508	1.15232
CSA001026.1	356	K	uncharacterized protein LOC100261574	3	3	1	0.000412426	92.538	TK(1)TEEDRNK	3	2.8304	1	1	0.00555789	123.35	TK(1)TEEDRNK	3	1.3903	2	1	0.019025	63.073	TK(1)TEEDRNK	3	1.6157	1	0.771	0.866	0.804	1.173	1.053	1.194	1.321	1.268	1.231		1.334	1.343		0.97	0.931		0.571	0.6		0.649175	0.59866		1.08557
CSA001060.1	243	K	replication factor C subunit 2	3	3	1	1.31743e-13	138.01	VCDQPHPLHVK(1)NMVR	3	1.9713	2	1	2.34565e-08	104.94	VCDQPHPLHVK(1)NMVR	3	0.85837	2	1	3.42415e-10	102.64	VCDQPHPLHVK(1)NMVR	3	0.70141	2	1.188	1.232	1.14	0.871	0.896	0.899	0.881	0.787	0.917	1.171	1.143	1.344	0.913	0.899	0.868	0.869	0.853	0.662	1.01452	1.07787	0.848214	0.953998	0.996663
CSA001061.1	39	K	60S ribosomal protein L24-like	3	3	1	0.000343777	116.37	CK(1)HYFHNR	2	-0.16889	3	1	0.000242543	117.4	CK(1)HYFHNR	3	-1.0175	2	1	0.000272871	117.4	CK(1)HYFHNR	3	-0.55655	2	1.668	1.692	1.51	0.425	0.398	0.419	0.499	0.53	0.77	1.959	1.998	1.957	0.402	0.385	0.415	0.289	0.279	0.307	0.851455	0.846847	0.771589	1.05721	1.03377
CSA001061.1	71	K	60S ribosomal protein L24-like	3	3	1	0.00105193	112.13	DVSAEAVK(1)K	2	1.0465	1	1	0.00532342	74.392	KDVSAEAVK(1)K	3	0.66015	1	1	0.000902768	94.122	KDVSAEAVK(1)K	3	-0.73928	1	1.837	1.558	1.74	0.34	0.538	0.323	0.273	0.611	0.417	1.959	1.998	1.957	0.402	0.385	0.415	0.289	0.279	0.307	0.937723	0.77978	0.889116	0.845771	1.3974
CSA001069.1	224	K	3-ketoacyl-CoA thiolase 2, peroxisomal	3	3	1	6.08971e-08	129.29	QEQDQAAVVSHK(1)R	3	-0.38027	1	1	6.54426e-07	118.51	QEQDQAAVVSHK(1)R	3	-0.40415	1	1	1.20506e-06	129.17	QEQDQAAVVSHK(1)R	3	0.15381	1	1.187	1.194	1.227	0.952	0.931	0.868	0.785	0.814	0.777	1.085	1.087	1.184	0.924	0.929	0.909	0.962	0.938	0.89	1.09401	1.09844	1.03632	1.0303	1.00215
CSA001071.1	218	K	sterol 3-beta-glucosyltransferase UGT80A2-like	3	2	1	0.00513841	77.923	AFFK(1)HLPR	3	-0.031157	2	1	0.0010629	96.492	AFFK(1)HLPR	3	0.43139	1	1	0.00112142	98.458	AFFK(1)HLPR	3	0.032594	2	1.105		1.044	0.979		1.033	0.911		0.944	1.138	1.121	1.1	0.984	0.947	0.942	0.836	0.89	0.866	0.971002		0.949091	0.994919
CSA001114.1	169	K	glutamine synthetase leaf isozyme, chloroplastic	3	3	0.999996	0.00241207	71.879	YK(1)AAEIFSNKK	3	1.9413	1	1	0.00162518	83.204	YK(1)AAEIFSNK	3	-3.8617	2	1	0.00101718	98.105	YK(1)AAEIFSNK	2	0.84841	1	0.501	0.489	0.59	1.138	1.179	1.106	1.885	1.806	1.786	0.532	0.462	0.538	1.053	1.051	1.034	1.516	1.619	1.568	0.941729	1.05844	1.09665	1.08072	1.12179
CSA001114.1	177	K	glutamine synthetase leaf isozyme, chloroplastic	3	3	1	2.66891e-06	133.75	AAEIFSNK(1)K	2	-0.8602	4	1	0.00262381	99.283	AAEIFSNK(1)K	2	-0.85593	1	1	0.000765909	110.39	AAEIFSNK(1)K	2	-1.0971	3	0.582	0.499	0.54	0.994	1.029	1.02	1.904	1.962	1.998	0.532	0.462	0.538	1.053	1.051	1.034	1.516	1.619	1.568	1.09398	1.08009	1.00372	0.94397	0.979068
CSA001114.1	327	K	glutamine synthetase leaf isozyme, chloroplastic	3	3	1	0.000994865	100.93	SMREDGGFEVIK(1)K	3	-1.0653	3	1	0.0012545	111.63	SMREDGGFEVIK(1)K	3	-0.070746	3	1	0.000506412	122.7	SMREDGGFEVIK(1)K	3	0.20951	5	0.584	0.517	0.481	1.109	1.149	1.189	1.761	1.79	1.905	0.532	0.462	0.538	1.053	1.051	1.034	1.516	1.619	1.568	1.09774	1.11905	0.894052	1.05318	1.09324
CSA001130.1	35	K	cell division control protein 2 homolog	3	3	1	3.65153e-05	114.72	VTNETIALK(1)K	2	0.66739	3	1	0.000146055	104.24	VTNETIALK(1)K	3	-0.0033661	3	1	0.000223464	129.34	VTNETIALK(1)K	2	0.78402	3	1.245	1.302	1.209	0.935	0.886	0.886	0.694	0.669	0.79
CSA001152.1	190	K	Naringenin,2-oxoglutarate 3-dioxygenase	3	2	1	0.00384925	77.732	ALSNFK(1)K	2	0.22299	1	1	0.0296565	78.516	ALSNFK(1)K	2	0.89388	1	1	0.0128424	89.355	ALSNFK(1)K	2	1.2094	2		0.898	0.969		0.882	0.886		1.41	1.287	1.05	1.097	1.095	0.843	0.734	0.759	1.1	1.154	1.102		0.818596	0.884932		1.20163
CSA001234.1	159	K	diphosphomevalonate decarboxylase MVD2-like	3	3	1	2.74654e-05	113.61	ETVETSMLIK(1)HR	3	0.87885	1	1	3.09065e-05	105.03	ETVETSMLIK(1)HR	3	1.8381	1	1	1.29308e-05	108.35	ETVETSMLIK(1)HR	3	1.1751	1	0.927	0.981	0.821	1.266	1.216	1.375	0.907	0.868	0.964	1.143	1.245	1.181	1.017	0.995	0.956	0.768	0.772	0.778	0.811024	0.787952	0.695174	1.24484	1.22211
CSA001274.1	265	K	1,4-alpha-glucan-branching enzyme 1, chloroplastic/amyloplastic isoform X1	3	3	1	0.000198272	99.732	FK(1)HGDGVWVDR	3	-1.5955	1	1	0.000728799	83.53	FK(1)HGDGVWVDR	3	-0.49162	1	1	0.001938	74.15	FK(1)HGDGVWVDR	3	-1.1131	1	0.847	0.856	0.774	0.99	0.912	0.959	1.396	1.45	1.593	0.842	0.845	0.857	0.925	0.915	0.911	1.309	1.276	1.275	1.00594	1.01302	0.903151	1.07027	0.996721
CSA001302.1	170	K	non-functional NADPH-dependent codeinone reductase 2-like	3	3	1	1.97521e-07	135.02	SIGVSNFTPK(1)K	3	0.38399	2	1	0.000654017	111.31	SIGVSNFTPK(1)K	2	-1.6634	2	1	0.000326423	130.15	SIGVSNFTPK(1)K	2	0.20492	2	0.514	0.567	0.421	0.849	0.83	0.873	2.213	2.07	2.43	0.459	0.4	0.531	0.69	0.655	0.734	1.945	2.202	1.936	1.11983	1.4175	0.792844	1.23043	1.26718
CSA001325.1	253	K	argininosuccinate synthase, chloroplastic isoform X1	3	3	1	1.65044e-05	122.33	GREDAIEYAK(1)K	3	1.3684	3	1	0.00140487	86.288	GREDAIEYAK(1)K	3	-1.4122	2	1	0.000125523	105.03	GREDAIEYAK(1)K	3	-0.83332	2	1.167	1.093	1.134	0.969	1.146	0.891	0.803	0.748	0.939	1.028	1.075	1.041	1.059	1.059	1.066	0.843	0.774	0.977	1.13521	1.01674	1.08934	0.915014	1.08215
CSA001352.1	99	K	aspartate aminotransferase, cytoplasmic	3	3	1	1.45624e-13	152.88	TEEGK(1)PLVLNVVR	3	1.0922	2	1	6.54794e-07	126.71	TEEGK(1)PLVLNVVR	3	0.5633	2	1	2.80615e-11	168	TEEGK(1)PLVLNVVR	2	1.2129	1	1.034	1.047	1.142	1.039	1.174	1.062	0.974	0.798	0.705	1.129	1.048	1.104	1.039	1.017	1.074	0.746	0.915	0.798	0.915855	0.999046	1.03442	1	1.15438
CSA001357.1	109	K	60S acidic ribosomal protein P0	3	2	1	0.00892099	89.698	YK(1)VGAPAR	2	0.80165	1	1	0.0166954	82.279	YK(1)VGAPAR	2	0.6486	1	1	0.00365648	100.02	YK(1)VGAPAR	2	0.59872	1		1.306	1.187		1.028	0.969		0.497	0.732
CSA001379.1	20	K	short-chain dehydrogenase TIC 32, chloroplastic-like isoform X1	3	3	1	0.00672003	100.88	EVK(1)NAISK	2	-0.27245	2	1	0.00363974	100.88	EVK(1)NAISK	2	-0.088512	2	1	0.00328928	100.88	EVK(1)NAISK	2	-0.77285	2	0.558	0.676	0.617	1.135	1.146	1.092	1.779	1.505	1.747	0.832	0.705	0.788	1.073	1.028	1.062	1.154	1.397	1.206	0.670673	0.958865	0.782995	1.05778	1.11479
CSA001404.1	66	K	ATP synthase gamma chain, chloroplastic	3	3	1	3.94109e-06	138.76	RIDSVK(1)NTQK	3	-1.3895	5	1	0.000649738	126.19	RIDSVK(1)NTQK	3	-1.0673	4	1	3.98609e-05	143.24	RIDSVK(1)NTQK	3	-1.0258	5	0.515	0.617	0.425	0.818	0.866	0.831	2.252	1.938	2.477	0.441	0.349	0.445	0.794	0.815	0.809	2.012	2.025	2.018	1.1678	1.76791	0.955056	1.03023	1.06258
CSA001404.1	345	K	ATP synthase gamma chain, chloroplastic	3	3	1	9.28191e-29	171.56	MSAMSNATDNAVELK(1)K	3	0.50653	1	1	1.73941e-10	102.3	MSAMSNATDNAVELK(1)K	3	-0.24421	2	1	1.58279e-15	149	MSAMSNATDNAVELK(1)K	3	-1.2059	4	0.492	0.586	0.611	0.811	0.88	0.893	2.302	1.978	2.014	0.441	0.349	0.445	0.794	0.815	0.809	2.012	2.025	2.018	1.11565	1.67908	1.37303	1.02141	1.07975
CSA001408.1	386	K	starch synthase 3, chloroplastic/amyloplastic	3	3	1	0.00275812	101.65	DFLLEEK(1)R	2	-0.51368	1	1	0.000407381	128.86	DFLLEEK(1)R	2	1.4922	1	1	0.00316671	98.048	DFLLEEK(1)R	2	-0.45446	1	0.735	0.77	0.678	1.167	1.166	1.108	1.399	1.312	1.602	0.723	0.764	0.835	1.022	1.043	1.094	1.348	1.124	1.116	1.0166	1.00785	0.811976	1.14188	1.11793
CSA001445.1	141	K	GDSL esterase/lipase 1-like	3	3	1	0.0141528	97.431	NVEK(1)WLK	2	-0.86374	1	1	0.0101682	96.948	NVEK(1)WLK	2	0.9258	1	1	0.00523995	109.71	NVEK(1)WLK	2	-0.91426	1	1.218	1.097	1.349	0.971	0.898	0.923	0.703	1.028	0.456	1.38	1.46	1.479	1.023	0.994	1.014	0.466	0.419	0.38	0.882609	0.75137	0.912103	0.949169	0.903421
CSA001445.1	153	K	GDSL esterase/lipase 1-like	3	3	1	0.00320009	89.047	QK(1)LGDVEAK(1)K	3	2.3201	3	1	0.00238069	105.65	QK(1)LGDVEAK(1)K	2	2.1594	1	1	0.00553859	90.15	LGDVEAK(1)K	3	-0.95664	2	1.244	1.251	1.306	0.977	0.974	0.994	0.645	0.661	0.453	1.38	1.46	1.479	1.023	0.994	1.014	0.466	0.419	0.38	0.901449	0.856849	0.883029	0.955034	0.979879
CSA001503.1	121	K	NADH dehydrogenase	3	3	1	9.58022e-07	111.83	AFAEK(1)HGWEYTVK	3	0.83345	1	1	1.82878e-05	100.11	AFAEK(1)HGWEYTVK	3	0.42796	1	1	3.67153e-05	94.717	AFAEK(1)HGWEYTVK	3	0.010172	1	1.023	1.054	0.964	1.053	1.043	1.023	0.98	0.938	1.122	1.043	1.054	0.978	0.992	0.936	1.003	0.949	0.995	1.028	0.980825	1	0.985685	1.06149	1.11432
CSA001515.1	77	K	transcriptional adapter ADA2b isoform X2	3	3	1	5.13183e-34	145.49	ASTIAQVK(1)NSPNPIKVEDHDNR	4	0.56989	2	1	4.15789e-17	148.85	ASTIAQVK(1)NSPNPIK	4	-0.95701	2	1	1.65035e-10	109.64	ASTIAQVK(1)NSPNPIK	3	-0.33751	1	1.083	1.014	1.172	0.948	0.979	0.84	0.994	1.085	0.926
CSA001515.1	117	K	transcriptional adapter ADA2b isoform X2	3	3	1	2.6546e-55	204.07	DEGPSLIELSGYNSK(1)R	2	0.01525	2	1	0.000601182	69.485	DEGPSLIELSGYNSK(1)R	3	-0.48895	1	1	6.53797e-09	90.498	DEGPSLIELSGYNSK(1)R	3	-0.2884	1	0.843	0.79	0.879	1.046	0.995	1.077	1.336	1.474	1.228
CSA001546.1	307	K	histone H1	3	3	1	0.011479	86.086	AGGAVK(1)K(1)PR	2	-0.03432	3	1	0.00423417	97.071	AGGAVK(1)K(1)PR	2	0.68808	2	1	0.00970471	94.407	AGGAVK(1)K(1)PR	2	-0.03069	2	0.867	0.949	0.907	1.085	0.969	0.952	1.243	1.214	1.328			1.253			0.906			0.753			0.723863
CSA001546.1	308	K	histone H1	3	3	1	0.011479	83.647	AGGAVK(1)K(1)PR	2	-0.03432	1	1	0.00423417	84.522	AGGAVK(1)K(1)PR	2	0.68808	1	1	0.0117198	78.516	AGGAVK(1)K(1)PR	2	-0.03069	1	0.777	0.861	0.714	1.1	1.075	1.155	1.399	1.252	1.466			1.253			0.906			0.753			0.569832
CSA001590.1	34	K	phosphopantothenate--cysteine ligase 2-like isoform X3	3	3	1	8.48324e-113	266.28	VVCVTSGGTTVPLEK(1)R	2	-0.5654	2	1	7.14726e-65	220.6	VVCVTSGGTTVPLEK(1)R	3	0.50404	2	1	7.82078e-37	205.68	VVCVTSGGTTVPLEK(1)R	3	-0.67375	2	0.844	0.771	0.769	1.074	1.377	1.299	1.301	1.062	1.172
CSA001605.1	12	K	probable histone H2B.1	3	1	0.95552	0.000765256	65.043	K(0.999)PAEK(0.956)K(0.045)PAAEK	3	0.011351	1	0.923807	0.0179717	63.727	K(1)PAEK(0.924)K(0.076)PAAEK	3	-0.28298	1	0.999868	0.0125599	69.275	ADK(0.971)K(0.029)PAEK(1)K	3	0.6127	1			1.321			0.959			0.468
CSA001605.1	23	K	probable histone H2B.1	3	2	1	0.0137932	90.15	APAEK(1)K(1)PK	2	1.1593	2	1	0.0394946	68.557	APAEK(1)K(1)PK	2	-2.5164	1	1	1.28286e-18	112.42	APAEK(1)K(1)PK	2	0.4277	2	0.968		0.978	1.259		1.266	0.834		0.782
CSA001605.1	24	K	probable histone H2B.1	3	2	1	0.0137932	90.15	APAEK(1)K(1)PK	2	1.1593	1	1	0.0394946	68.557	APAEK(1)K(1)PK	2	-2.5164	1	1	0.0174049	86.898	APAEK(1)K(1)PK	2	0.4277	1	0.968		0.978	1.259		1.266	0.834		0.782
CSA001606.1	8	K	core histone H2A/H2B/H3/H4	3	3	0.971918	0.000289146	117.79	TAEK(0.972)K(0.028)PAEK(1)K	3	0.46521	2	0.953272	0.00504782	72.34	APK(1)TAEK(0.953)K(0.047)PAEK	3	-1.7182	3	0.980159	0.00143115	94.122	TAEK(0.98)K(0.02)PAEK(1)K	3	0.046248	2	1.147	1.166	1.142	1.143	1.141	1.163	0.631	0.621	0.576
CSA001606.1	13	K	core histone H2A/H2B/H3/H4	3	3	1	0.000289146	117.79	TAEK(0.971)K(0.029)PAEK(1)K	4	0.87675	4	0.999654	0.00905084	72.34	TAEK(0.942)K(0.059)PAEK(1)K	3	-0.73537	2	0.999959	0.00143115	94.122	TAEK(0.98)K(0.02)PAEK(1)K	3	0.046248	5	1.069	1.166	1.032	1.287	1.141	1.301	0.607	0.621	0.626
CSA001606.1	26	K	core histone H2A/H2B/H3/H4	3	3	1	0.00723951	63.181	TTAAEK(1)APAEK(1)K	3	1.0764	2	1	0.00908609	71.558	TTAAEK(1)APAEK(1)K	3	1.5001	2	1	0.0026282	74.987	TTAAEK(1)APAEK(1)K	3	0.4562	2	1.152	1.068	1.095	0.934	1.031	0.931	0.875	0.927	0.969
CSA001606.1	31	K	core histone H2A/H2B/H3/H4	3	3	1	0.00723951	90.15	TTAAEK(1)APAEK(1)K	3	1.0764	4	1	0.00908609	71.558	TTAAEK(1)APAEK(1)K	3	1.5001	3	1	0.0026282	86.898	TTAAEK(1)APAEK(1)K	3	0.4562	3	1.054	1.068	1.024	1.107	1.031	1.136	0.853	0.927	0.854
CSA001606.1	32	K	core histone H2A/H2B/H3/H4	3	2	1	0.0137932	90.15	APAEK(1)K(1)PK	2	1.1593	1	1	0.0394946	68.557	APAEK(1)K(1)PK	2	-2.5164	1	1	0.0174049	86.898	APAEK(1)K(1)PK	2	0.4277	1	0.968		0.978	1.259		1.266	0.834		0.782
CSA001619.1	670	K	trifunctional UDP-glucose 4,6-dehydratase/UDP-4-keto-6-deoxy-D-glucose 3,5-epimerase/UDP-4-keto-L-rhamnose-reductase RHM1	3	3	1	0.000736321	117.89	YVFEPNK(1)K	2	1.0946	2	1	0.000861937	97.798	YVFEPNK(1)K	3	0.53554	1	1	0.000355206	111.82	YVFEPNK(1)K	2	1.8542	2	1.276	1.345	1.307	0.937	0.844	0.83	0.632	0.64	0.661	1.41	1.371	1.39	0.936	0.961	0.945	0.462	0.481	0.543	0.904965	0.981036	0.940288	1.00107	0.878252
CSA001625.1	80	K	ABC transporter C family member 10-like	3	3	1	0.00890447	78.964	GVNLSGGQK(1)QR	2	-0.19534	1	1	1.0917e-06	142.47	GVNLSGGQK(1)QR	2	-0.5819	2	1	0.000403923	132.5	GVNLSGGQK(1)QR	2	0.011571	2	0.907	0.873	0.875	1.295	1.289	1.155	0.909	0.978	1.135
CSA001667.1	232	K	elongation factor 1-alpha	3	3	1	0.000142805	119.62	RPSDK(1)PLR	3	0.69538	1	1	0.002773	93.598	RPSDK(1)PLR	3	-0.69174	2	1	0.00889749	80.755	RPSDK(1)PLR	3	0.58606	2	1.445	1.49	1.376	0.879	0.91	1.002	0.373	0.302	0.297	1.19	1.203	1.207	0.891	0.916	0.894	0.856	0.86	0.83	1.21429	1.23857	1.14002	0.986532	0.99345
CSA001777.1	135	K	phosphoglycolate phosphatase 1B, chloroplastic-like	3	3	1	6.80947e-33	190.37	LVFVTNNSTK(1)SR	3	0.20775	3	1	1.14642e-97	255.16	LVFVTNNSTK(1)SR	3	0.10644	3	1	1.1616e-53	243.4	LVFVTNNSTK(1)SR	3	0.16068	4	0.358	0.408	0.311	0.726	0.724	0.679	2.665	2.484	2.906	0.505	0.473	0.443	0.922	0.885	0.923	1.844	1.805	1.874	0.708911	0.862579	0.702032	0.787419	0.818079
CSA001818.1	139	K	indole-3-glycerol phosphate synthase, chloroplastic	3	3	1	0.00597964	97.431	K(1)PLFSLK	2	0.52736	1	1	0.00702479	96.948	K(1)PLFSLK	2	0.16438	1	1	0.0146531	86.67	K(1)PLFSLK	2	0.42541	2	0.52	0.694	0.584	1.1	1.106	1.09	1.895	1.517	1.818	0.788	0.845	0.788	1.066	1.089	1.077	1.195	1.169	1.185	0.659898	0.821302	0.741117	1.03189	1.01561
CSA001818.1	328	K	indole-3-glycerol phosphate synthase, chloroplastic	3	3	1	0.000249972	125.97	VDISNTK(1)K	3	0.5866	2	1	0.00197562	103.26	VDISNTK(1)K	3	0.33254	2	1	0.000728219	117.7	VDISNTK(1)K	3	1.1909	2	0.905	1.029	0.924	1.057	1.012	1.117	1.205	1.02	1.082	0.788	0.845	0.788	1.066	1.089	1.077	1.195	1.169	1.185	1.14848	1.21775	1.17259	0.991557	0.929293
CSA001820.1	97	K	mitochondrial outer membrane protein porin of 34 kDa	3	3	1	0.000159817	108.35	TILSFK(1)VPDQR	2	-2.1043	2	1	3.87682e-06	133.32	TILSFK(1)VPDQR	3	0.83076	2	1	0.000510111	123.26	TILSFK(1)VPDQR	2	-1.059	2	0.803	0.778	0.762	1.037	1.055	1.07	1.427	1.425	1.476	0.894	0.9	0.923	0.962	0.981	0.954	1.171	1.146	1.138	0.89821	0.864444	0.825569	1.07796	1.07543
CSA001820.1	228	K	mitochondrial outer membrane protein porin of 34 kDa	3	3	1	1.57537e-28	147.28	NTFTVGTQHSLDPLTTVK(1)AR	3	-1.2502	1	1	4.60755e-30	152.64	NTFTVGTQHSLDPLTTVK(1)AR	3	-0.124	1	1	1.10534e-29	153.36	NTFTVGTQHSLDPLTTVK(1)AR	3	-0.74652	1	0.934	1.002	0.906	1.017	1.043	1.046	1.195	1.031	1.21	0.894	0.9	0.923	0.962	0.981	0.954	1.171	1.146	1.138	1.04474	1.11333	0.981582	1.05717	1.0632
CSA001859.1	295	K	trafficking protein particle complex II-specific subunit 120 homolog isoform X2	3	3	1	1.46082e-06	137.4	K(1)SFIQDNAQR	2	-0.45723	1	1	0.000281241	122.18	K(1)SFIQDNAQR	2	0.25815	1	1	0.00238124	85.522	K(1)SFIQDNAQR	2	0.51993	1	1.236	1.223	1.085	0.925	0.97	0.942	0.724	0.715	0.974	1.175	1.198	1.206	0.999	1.01	1.029	0.76	0.721	0.676	1.05191	1.02087	0.899668	0.925926	0.960396
CSA001864.1	524	K	heat shock protein 90-5, chloroplastic	3	3	1	6.61146e-05	97.163	LGCIEDSGNHK(1)R	3	1.0212	1	1	2.98609e-05	104.07	LGCIEDSGNHK(1)R	3	0.16529	1	1	4.61022e-06	121.68	LGCIEDSGNHK(1)R	3	0.61419	1	1.096	1.013	1.054	0.977	1.142	1.06	0.932	0.896	0.889	0.77	0.763	0.761	1.432	1.434	1.444	0.877	0.844	0.871	1.42338	1.32765	1.38502	0.682263	0.796374
CSA001864.1	570	K	heat shock protein 90-5, chloroplastic	3	3	1	0.00249836	102.73	SAK(1)TAPFLEK	3	-1.495	2	1	0.00286166	105.65	SAK(1)TAPFLEK	2	-0.75696	2	1	0.000514447	101.53	SAK(1)TAPFLEK	3	-0.86456	2	0.811	0.784	0.786	1.653	1.719	1.733	0.658	0.642	0.578	0.77	0.763	0.761	1.432	1.434	1.444	0.877	0.844	0.871	1.05325	1.02752	1.03285	1.15433	1.19874
CSA001864.1	725	K	heat shock protein 90-5, chloroplastic	3	3	1	0.00270561	86.923	NAPDSTDAK(1)R	2	0.21184	1	1	1.0738e-08	150.46	NAPDSTDAK(1)R	3	-0.8488	2	1	0.00111555	94.363	NAPDSTDAK(1)R	3	0.035452	2	0.735	0.82	0.736	1.595	1.585	1.612	0.875	0.73	0.838	0.77	0.763	0.761	1.432	1.434	1.444	0.877	0.844	0.871	0.954545	1.07471	0.967148	1.11383	1.1053
CSA001999.1	391	K	SEC1 family transport protein SLY1-like	3	3	1	0.00293024	100.02	SLDSFAK(1)K	2	-0.23153	1	1	0.00234044	101.65	SLDSFAK(1)K	2	-0.25511	1	1	0.00122168	111.46	SLDSFAK(1)K	2	-0.9207	1	1.194	1.118	1.275	0.952	0.984	0.96	0.771	0.89	0.561	1.168	1.112	1.076	1.009	1.012	1.04	0.773	0.792	0.815	1.02226	1.0054	1.18494	0.943508	0.972332
CSA002026.1	47	K	nucleoside diphosphate kinase 1	3	3	1	0.00146161	67.102	AFAEK(1)HYADLSAK	3	-0.1241	1	1	2.68513e-05	92.939	AFAEK(1)HYADLSAK	3	0.26681	2	1	0.000163051	80.746	AFAEK(1)HYADLSAK	3	0.38081	1	1.211	1.193	1.33	0.935	0.795	0.847	0.762	0.976	0.593	1.194	1.158	1.191	0.951	0.936	0.931	0.61	0.853	0.77	1.01424	1.03022	1.11671	0.983176	0.849359
CSA002052.1	38	K	guanine nucleotide-binding protein subunit beta-like protein	3	3	1	0.000161002	108.24	DK(1)SLIVWHLTK	3	2.1102	1	1	0.00346311	66.393	DK(1)SLIVWHLTK	3	-0.39117	1	1	0.0216262	48.467	DK(1)SLIVWHLTK	3	1.2297	1	1.252	1.149	1.121	1.006	1	1.043	0.594	0.814	0.773	1.112	1.221	1.133	0.97	0.959	0.986	0.859	0.746	0.755	1.1259	0.941032	0.989409	1.03711	1.04275
CSA002052.1	47	K	guanine nucleotide-binding protein subunit beta-like protein	3	2	1	0.000719194	78.287	SLIVWHLTK(1)EDR	3	-0.7954	1	1	0.000353935	84.169	SLIVWHLTK(1)EDR	3	0.069895	1	1	0.011953	52.576	SLIVWHLTK(1)EDR	3	-0.36189	1	0.82	0.84		1.05	1.053		1.378	1.314		1.112	1.221	1.133	0.97	0.959	0.986	0.859	0.746	0.755	0.73741	0.687961		1.08247	1.09802
CSA002064.1	380	K	aspartic proteinase Asp1 isoform X1	3	3	1	0.000499809	89.805	RIESINEVK(1)K	3	1.2994	1	1	0.018911	61.233	RIESINEVK(1)K	3	1.6077	1	1	0.003838	78.548	RIESINEVK(1)K	3	0.78395	1	1.108	1.113	1.136	0.963	0.984	0.914	0.924	0.9	0.907
CSA002108.1	127	K	carbonic anhydrase 2 isoform X1	3	3	1	0.00950141	62.463	MK(1)NGFIHFK	3	0.19001	3	1	0.0141774	57.55	MK(1)NGFIHFK	3	-1.1216	2	1	0.00837161	63.816	MK(1)NGFIHFK	3	-0.9801	1	0.45	0.208	0.199	1.017	1.196	1.098	2.133	2.297	2.601	0.361	0.343	0.371	0.992	1.031	1.047	1.815	1.829	1.782	1.24654	0.606414	0.536388	1.0252	1.16004
CSA002108.1	134	K	carbonic anhydrase 2 isoform X1	3	3	1	0.000662946	107.9	NGFIHFK(1)R	3	-0.32771	2	1	0.000976825	106.91	NGFIHFK(1)R	2	2.1669	2	1	0.000413376	125.31	NGFIHFK(1)R	2	3.4215	2	0.695	0.45	0.586	0.916	1.14	1.049	1.781	1.921	1.865	0.361	0.343	0.371	0.992	1.031	1.047	1.815	1.829	1.782	1.92521	1.31195	1.57951	0.923387	1.10572
CSA002108.1	155	K	carbonic anhydrase 2 isoform X1	3	3	1	2.66841e-39	188.27	GQSPK(1)FMVFACSDSR	3	0.11336	2	1	2.04923e-16	148.52	GQSPK(1)FMVFACSDSR	2	-0.80542	3	1	1.65944e-15	158.98	GQSPK(1)FMVFACSDSR	2	-0.52958	2	0.624	0.793	0.161	1.242	1.156	1.336	1.522	1.28	2.376	0.361	0.343	0.371	0.992	1.031	1.047	1.815	1.829	1.782	1.72853	2.31195	0.433962	1.25202	1.12124
CSA002108.1	194	K	carbonic anhydrase 2 isoform X1	3	3	1	3.85444e-09	134.88	NVANMVPPFDK(1)TK	2	-0.70964	10	1	9.02879e-09	133.48	NVANMVPPFDK(1)TK	2	-0.0088931	7	1	4.04615e-06	127.36	NVANMVPPFDK(1)TK	2	0.46504	9	0.493	0.474	0.395	1.104	1.126	1.151	1.942	1.894	2.13	0.361	0.343	0.371	0.992	1.031	1.047	1.815	1.829	1.782	1.36565	1.38192	1.06469	1.1129	1.09214
CSA002108.1	255	K	carbonic anhydrase 2 isoform X1	3	3	1	0.000100708	132.57	VCLPAK(1)NK	2	0.69427	2	1	0.000861984	122.74	VCLPAK(1)NK	2	-0.00025474	2	1	0.000226774	133.12	VCLPAK(1)NK	2	0.6741	2	0.262	0.355	0.261	1.833	1.658	1.832	1.503	1.489	1.535	0.361	0.343	0.371	0.992	1.031	1.047	1.815	1.829	1.782	0.725762	1.03499	0.703504	1.84778	1.60815
CSA002130.1	111	K	calcyclin-binding protein	3	1	1	0.00962001	60.102	FHDVQGK(1)NYR	3	-0.02436	1	1	0.0159279	52.725	FHDVQGK(1)NYR	3	-1.2395	1	1	0.00464151	68.557	FHDVQGK(1)NYR	3	-2.0409	1	1.281			0.911			0.653			1.341	1.357	1.341	0.792	0.768	0.826	0.755	0.741	0.695	0.955257			1.15025
CSA002130.1	128	K	calcyclin-binding protein	3	3	1	0.0103929	68.224	EIVPDK(1)CK	3	-0.063663	1	1	0.00410775	79.474	EIVPDK(1)CK	3	0.96342	1	1	0.00451059	87.258	EIVPDK(1)CK	3	1.1472	2	1.286	1.267	1.444	0.762	0.917	0.781	0.827	0.7	0.439	1.341	1.357	1.341	0.792	0.768	0.826	0.755	0.741	0.695	0.958986	0.933677	1.07681	0.962121	1.19401
CSA002135.1	46	K	30S ribosomal protein S6 alpha, chloroplastic	3	0	1	6.2092e-21	143.97	GVIPLAYSIK(1)K	2	-1.1289	1	1	2.3506e-13	121.02	GVIPLAYSIK(1)K	2	-0.086603	1	1	5.39179e-06	145.91	GVIPLAYSIK(1)K	2	-1.7888	1										0.889	0.792	0.848	1.101	1.204	1.154	1.044	1.067	1.044
CSA002145.1	253	K	glucan endo-1,3-beta-glucosidase 6	3	3	1	6.00474e-05	132.01	NVQYLEK(1)K	2	0.9232	1	1	0.000850321	116.52	NVQYLEK(1)K	2	0.40434	1	1	0.000174003	132.01	NVQYLEK(1)K	3	0.4049	2	1.173	1.261	1.282	0.87	0.876	0.906	0.912	0.756	0.615	1.161	1.149	1.141	1	1.046	1.009	0.821	0.772	0.792	1.01034	1.09748	1.12358	0.87	0.837476
CSA002220.1	50	K	60S ribosomal protein L14-1	3	3	1	0.000972421	121.52	CQMNFK(1)R	2	-0.47696	1	1	8.44121e-06	157.9	CQMNFK(1)R	2	-0.40176	2	1	0.00330662	111.65	CQMNFK(1)R	2	-0.88152	2	1.45	1.482	1.453	0.867	0.821	0.818	0.382	0.419	0.375	1.345	1.43	1.303	1.017	1.005	1.051	0.554	0.432	0.527	1.07807	1.03636	1.11512	0.852507	0.816915
CSA002220.1	96	K	60S ribosomal protein L14-1	3	0	0.999987	0.00655925	62.659	KLIVQK(1)R	2	0.038483	1	1	0.00350826	89.142	KLIVQK(1)R	2	-0.0443	1	0.999936	0.0318663	52.403	KLIVQK(1)R	2	0.14272	1										1.345	1.43	1.303	1.017	1.005	1.051	0.554	0.432	0.527
CSA002220.1	113	K	60S ribosomal protein L14-1	3	3	1	0.00787741	108.24	LMLAK(1)IK	3	-1.4099	4	1	0.00449287	107.43	LMLAK(1)IK	3	-0.84139	3	1	0.0114328	97.068	LMLAK(1)IK	3	-0.35839	3	1.347	1.316	1.357	1.001	1.019	1.025	0.416	0.49	0.308	1.345	1.43	1.303	1.017	1.005	1.051	0.554	0.432	0.527	1.00149	0.92028	1.04144	0.984267	1.01393
CSA002220.1	126	K	60S ribosomal protein L14-1	3	3	1	0.0141528	97.431	QELAK(1)LK	2	-0.18338	1	1	0.0272774	85.676	QELAK(1)LK	2	0.035909	1	1	0.0229919	85.676	QELAK(1)LK	3	1.4146	2	1.322	1.264	1.319	0.962	0.981	0.91	0.513	0.627	0.533	1.345	1.43	1.303	1.017	1.005	1.051	0.554	0.432	0.527	0.9829	0.883916	1.01228	0.945919	0.976119
CSA002248.1	431	K	anaphase-promoting complex subunit 8	3	3	1	4.47735e-05	125.03	K(1)SVFLQPNDSR	2	1.4499	1	1	0.000654017	111.31	K(1)SVFLQPNDSR	2	1.0635	1	1	5.423e-06	145.83	K(1)SVFLQPNDSR	2	0.55858	1	0.908	0.998	0.959	1.238	1.346	1.296	0.977	0.687	0.782		1.124			0.864			0.976			0.8879			1.55787
CSA002293.1	232	K	uncharacterized protein LOC104586196	3	2	1	6.80137e-20	167.89	IAGIDPLEQITK(1)R	2	0.9128	1	1	4.77363e-06	113.07	IAGIDPLEQITK(1)R	3	-3.8268	1	1	1.67234e-06	111.79	IAGIDPLEQITK(1)R	3	0.18887	1	0.808		0.799	1.304		0.976	1.088		1.524
CSA002313.1	579	K	bifunctional fucokinase/fucose pyrophosphorylase	3	3	1	0.000955096	99.752	NESFLPLWK(1)R	2	-1.4723	1	1	0.00292216	87.667	NESFLPLWK(1)R	2	-0.91744	1	1	0.0143659	67.385	NESFLPLWK(1)R	2	-0.80374	1	1.219	1.282	1.173	1.053	1.074	1.062	0.602	0.489	0.64	1.142	1.153	1.101	1.047	1.075	1.075	0.737	0.758	0.802	1.06743	1.11188	1.0654	1.00573	0.99907
CSA002335.1	97	K	uncharacterized protein LOC102623101	3	3	1	0.000525634	92.051	FADENFVK(1)K	3	-2.4853	3	1	0.000980412	99.283	FADENFVK(1)K	2	0.41232	5	1	0.000583748	110.39	FADENFVK(1)K	2	-1.8668	6	1.314	1.366	1.2	0.874	0.894	0.93	0.636	0.545	0.754	1.293	1.345	1.332	0.861	0.846	0.86	0.734	0.651	0.648	1.01624	1.01561	0.900901	1.0151	1.05674
CSA002354.1	337	K	uncharacterized protein LOC109244961	3	3	1	5.88277e-05	94.781	K(1)TSGSVLLIPDGN	2	2.2346	1	1	0.00300695	71.529	K(1)TSGSVLLIPDGN	2	-1.3476	1	1	6.67021e-05	97.273	K(1)TSGSVLLIPDGN	2	1.7669	1	1.053	1.026	0.901	1.056	0.963	1.182	0.918	1.081	1.048	0.957	0.916	0.93	1.023	0.995	1	1.026	1.096	1.086	1.10031	1.12009	0.968817	1.03226	0.967839
CSA002375.1	32	K	acyl-CoA-binding domain-containing protein 4	3	3	1	0.000790854	85.522	YK(1)HATAVVDEK	3	0.92805	1	1	0.0007509	82.85	YK(1)HATAVVDEK	3	0.84512	1	1	0.000528168	87.216	YK(1)HATAVVDEK	3	1.1517	1	0.989	1.03	1.034	1.276	1.188	1.141	0.774	0.813	0.826	1.079	0.993	1.031	1.144	1.15	1.178	0.776	0.808	0.75	0.916589	1.03726	1.00291	1.11538	1.03304
CSA002400.1	49	K	3-oxoacyl-[acyl-carrier-protein] synthase I, chloroplastic-like	3	3	1	6.18186e-06	133.89	VFK(1)NTSEIK	2	0.66365	2	1	5.68267e-05	116.55	VFK(1)NTSEIK	3	0.55332	3	1	5.43053e-07	157.38	VFK(1)NTSEIK	2	0.49906	3	1.082	1.22	1.124	1.037	1.056	1.04	0.885	0.621	0.77
CSA002439.1	272	K	heat stress transcription factor B-2a-like	3	3	1	0.00113551	107.1	LFGVPIGAK(1)R	2	-1.0204	2	1	0.00244248	94.309	LFGVPIGAK(1)R	2	-1.3967	3	1	0.000305973	134.26	LFGVPIGAK(1)R	2	-1.8591	2	0.74	0.817	0.719	1.274	1.13	1.313	1.257	1.27	1.256
CSA002466.1	364	K	2-hydroxyacyl-CoA lyase	3	3	1	5.8536e-05	116.55	THPWVEAICK(1)K	3	-1.0064	1	1	0.000343301	98.898	THPWVEAICK(1)K	3	-1.5331	1	1	0.000268149	92.866	THPWVEAICK(1)K	3	-1.816	1	0.887	0.93	0.927	1.333	1.135	1.191	0.901	1.054	0.982	0.806	0.841	0.837	1.114	1.089	1.106	1.126	1.102	1.133	1.1005	1.10583	1.10753	1.19659	1.04224
CSA002530.1	284	K	U3 small nucleolar RNA-associated protein 25	3	3	1	0.00133561	95.477	K(1)SDDEIFLK	2	-0.4787	1	1	0.00220771	108.35	K(1)SDDEIFLK	2	-0.41289	1	1	0.00144939	95.477	K(1)SDDEIFLK	2	0.65473	1	1.403	1.548	1.514	0.838	0.722	0.721	0.506	0.415	0.372	1.518	1.539	1.646	0.745	0.686	0.706	0.538	0.542	0.462	0.924242	1.00585	0.919806	1.12483	1.05248
CSA002530.1	312	K	U3 small nucleolar RNA-associated protein 25	3	3	1	1.73873e-08	109.36	K(1)SVSINEFLKPAER	3	1.4089	1	1	2.52085e-05	86.005	K(1)SVSINEFLKPAER	3	1.5938	1	1	7.33605e-09	127.88	K(1)SVSINEFLKPAER	3	1.528	1	1.263	1.182	1.199	0.907	0.965	0.896	0.693	0.797	0.799	1.518	1.539	1.646	0.745	0.686	0.706	0.538	0.542	0.462	0.832016	0.768031	0.728433	1.21745	1.40671
CSA002537.1	218	K	chaperonin CPN60-2, mitochondrial-like	3	3	1	0.00147731	125.98	SIEFK(1)DR	2	1.0164	1	1	0.00906159	98.582	SIEFK(1)DR	2	0.97769	1	1	0.0427867	76.679	SIEFK(1)DR	2	1.432	1	1.086	1.187	1.097	1.063	1.124	1.061	0.846	0.603	0.799	1.106	1.101	1.114	1.054	1.062	1.071	0.779	0.763	0.755	0.981917	1.07811	0.98474	1.00854	1.05838
CSA002537.1	222	K	chaperonin CPN60-2, mitochondrial-like	3	3	1	0.000224218	128.85	VK(1)NIGASLVK	3	1.5018	3	1	0.000401559	122.33	VK(1)NIGASLVK	3	1.1491	4	1	0.000204138	140.24	VK(1)NIGASLVK	3	0.29678	3	1.191	1.067	1.162	1.103	1.033	1.099	0.594	0.927	0.617	1.106	1.101	1.114	1.054	1.062	1.071	0.779	0.763	0.755	1.07685	0.969119	1.04309	1.04649	0.972693
CSA002537.1	364	K	chaperonin CPN60-2, mitochondrial-like	3	3	1	2.13678e-14	145.81	GYISPYFITNPK(1)NQK	3	0.84146	1	1	1.45606e-13	136.3	GYISPYFITNPK(1)NQK	3	0.45137	1	1	2.6882e-15	153.81	GYISPYFITNPK(1)NQK	3	-0.51073	1	1.161	1.159	1.149	1.053	1.083	1.015	0.713	0.7	0.751	1.106	1.101	1.114	1.054	1.062	1.071	0.779	0.763	0.755	1.04973	1.05268	1.03142	0.999051	1.01977
CSA002537.1	397	K	chaperonin CPN60-2, mitochondrial-like	3	3	1	0.000736321	117.89	VLELALK(1)K	3	-1.0937	2	1	0.000876591	116.05	VLELALK(1)K	2	-0.45536	1	1	1.80842e-05	144.09	VLELALK(1)K	2	0.091062	3	1.126	1.172	1.17	1.216	1.2	1.143	0.581	0.542	0.543	1.106	1.101	1.114	1.054	1.062	1.071	0.779	0.763	0.755	1.01808	1.06449	1.05027	1.1537	1.12994
CSA002537.1	474	K	chaperonin CPN60-2, mitochondrial-like	3	2	1	0.00247084	108.7	VGIEMLGK(1)CK	2	-0.1802	1	1	6.39525e-07	100.88	VGIEMLGK(1)CK	2	2.0624	1	1	0.00156828	94.465	VGIEMLGK(1)CK	2	-1.7388	1	1.277		1.177	1.088		1.071	0.444		0.621	1.106	1.101	1.114	1.054	1.062	1.071	0.779	0.763	0.755	1.15461		1.05655	1.03226
CSA002537.1	494	K	chaperonin CPN60-2, mitochondrial-like	3	3	1	9.15824e-08	127.02	DDTVILDGAGDK(1)K	3	-0.71045	1	1	4.7403e-10	145.1	DDTVILDGAGDK(1)K	2	-1.2576	2	1	8.3277e-07	117.93	DDTVILDGAGDK(1)K	3	-0.30651	2	1.137	1.076	0.992	0.998	1.055	1.102	0.827	0.885	0.961	1.106	1.101	1.114	1.054	1.062	1.071	0.779	0.763	0.755	1.02803	0.977293	0.890485	0.946869	0.993409
CSA002537.1	547	K	chaperonin CPN60-2, mitochondrial-like	3	3	1	1.58609e-05	96.82	IGGASEAEVSEK(1)K	3	-1.9354	1	1	1.84832e-07	130.2	IGGASEAEVSEK(1)K	2	-0.60265	2	1	2.17966e-11	167.32	IGGASEAEVSEK(1)K	2	-0.4606	2	1.151	1.078	1.148	1.019	1.031	1.053	0.775	0.908	0.704	1.106	1.101	1.114	1.054	1.062	1.071	0.779	0.763	0.755	1.04069	0.97911	1.03052	0.966793	0.97081
CSA002568.1	226	K	uncharacterized protein At5g02240-like	3	3	1	4.96286e-06	121.24	FK(1)AFDLASKPER	3	0.63573	1	0.999968	0.0118392	60.55	FK(1)AFDLASKPER	3	0.60106	1	1	2.32005e-07	150.22	FK(1)AFDLASKPER	3	1.2785	1	1.051	1.055	1.027	1.245	1.158	1.154	0.69	0.802	0.823	1.024	1.054	1.027	1.122	1.13	1.142	0.819	0.801	0.789	1.02637	1.00095	1	1.10963	1.02478
CSA002568.1	233	K	uncharacterized protein At5g02240-like	3	3	1	2.98189e-06	138.76	AFDLASK(1)PER	2	-2.6489	2	1	0.00602834	78.043	AFDLASK(1)PER	2	-1.012	2	1	0.000725538	117.09	AFDLASK(1)PER	2	0.97039	3	0.988	0.867	0.964	1.309	1.021	1.184	0.735	1.302	0.916	1.024	1.054	1.027	1.122	1.13	1.142	0.819	0.801	0.789	0.964844	0.822581	0.938656	1.16667	0.90354
CSA002579.1	206	K	30S ribosomal protein 2, chloroplastic	3	3	1	0.00118009	119.68	NFFAEK(1)GK	3	-1.6749	2	1	0.00512859	96.342	NFFAEK(1)GK	3	-0.27	2	1	0.00233662	87.476	NFFAEK(1)GK	3	-1.7195	2	0.787	0.815	0.751	1.371	1.264	1.494	1.049	1.115	0.955	0.669	0.684	0.634	1.243	1.2	1.246	1.185	1.206	1.19	1.17638	1.19152	1.18454	1.10298	1.05333
CSA002602.1	132	K	peptidyl-prolyl cis-trans isomerase	3	3	1	1.23613e-35	194.59	TEWLDGK(1)HVVFGR	3	-1.7535	5	1	1.7582e-07	125.03	TEWLDGK(1)HVVFGR	3	-0.41713	3	1	4.14393e-12	173.59	TEWLDGK(1)HVVFGR	3	1.4221	4	1.182	1.062	1.139	0.887	0.954	0.919	0.874	1.027	0.894	1.112	1.163	1.193	0.888	0.883	0.871	0.961	0.9	0.91	1.06295	0.913156	0.954736	0.998874	1.08041
CSA002602.1	147	K	peptidyl-prolyl cis-trans isomerase	3	2	1	3.25675e-09	136.81	IVEGMDVVK(1)AIEK	2	-1.3338	5	1	1.23057e-06	117.93	IVEGMDVVK(1)AIEK	3	0.3566	3	1	0.00313133	56.569	IVEGMDVVK(1)AIEK	3	0.53153	1	1.075	0.965		0.905	0.986		1.059	1.165		1.112	1.163	1.193	0.888	0.883	0.871	0.961	0.9	0.91	0.966727	0.829751		1.01914	1.11665
CSA002629.1	195	K	branched-chain-amino-acid aminotransferase 3, chloroplastic	3	3	1	0.00102511	115.71	TTVLANK(1)R	2	-0.60078	2	1	0.0013467	107.69	TTVLANK(1)R	2	2.473	1	1	0.00168632	106.42	TTVLANK(1)R	2	1.6924	2	1.023	0.949	1.015	1.013	1.155	1.02	1.028	0.999	1.02	0.96	1.032	0.936	1.042	1.029	1.065	0.944	0.867	0.959	1.06563	0.919574	1.0844	0.972169	1.12245
CSA002692.1	633	K	alpha-glucan phosphorylase, H isozyme	3	3	1	1.26415e-22	180.19	AFATYTNAK(1)R	2	-0.12181	1	1	1.51518e-08	146.71	AFATYTNAK(1)R	2	-0.22049	1	1	2.83713e-06	153.33	AFATYTNAK(1)R	2	1.4398	1	0.849	0.936	0.89	1.302	1.22	1.158	1.014	0.946	1.103	0.783	0.787	0.793	1.22	1.209	1.156	1.094	1.095	1.107	1.08429	1.18933	1.12232	1.06721	1.0091
CSA002703.1	84	K	ribulose-phosphate 3-epimerase, chloroplastic	3	3	1	8.83816e-08	145	TVNQIK(1)SLGAK	3	0.61833	3	1	2.49572e-14	166.48	TVNQIK(1)SLGAK	3	0.43738	4	1	1.01367e-09	168.43	TVNQIK(1)SLGAK	3	0.34118	4	0.606	0.483	0.426	1.121	1.21	1.26	1.704	1.782	1.925
CSA002712.1	301	K	enolase	3	3	1	1.39468e-07	93.424	IQIVGDDLLVTNPK(1)R	3	-1.1157	1	1	6.31304e-37	192.96	IQIVGDDLLVTNPK(1)R	2	-1.2083	1	1	1.00117e-36	211.78	IQIVGDDLLVTNPK(1)R	3	-2.3795	3	1.066	1.313	1.078	0.883	0.88	0.839	1.103	0.657	1.123	1.282	1.247	1.268	0.899	0.913	0.909	0.721	0.753	0.712	0.831513	1.05293	0.850158	0.982202	0.963855
CSA002837.1	258	K	ATP-dependent Clp protease ATP-binding subunit CLPT2, chloroplastic	3	3	1	0.000182371	125.97	ELETLISK(1)R	2	0.21836	1	1	4.84808e-05	132.39	ELETLISK(1)R	2	-0.26135	1	1	0.000195202	130.41	ELETLISK(1)R	2	-1.7099	1	0.781	0.773	0.776	1.144	1.248	1.171	1.338	1.21	1.319	0.681	0.707	0.736	1.157	1.123	1.135	1.26	1.305	1.227	1.14684	1.09335	1.05435	0.988764	1.11131
CSA002923.1	236	K	pentatricopeptide repeat-containing protein At1g61870, mitochondrial	3	2	1	0.00842598	62.546	VLDLMK(1)K	2	-0.17863	1	1	0.0344557	76.478	VLDLMK(1)K	2	0.24082	1	1	0.00988651	94.114	VLDLMK(1)K	2	0.99906	1		1.197	1.264		0.897	0.954		0.851	0.59	1.064	1.165	1.151	0.943	0.945	0.94	0.973	0.815	0.856		1.02747	1.09818		0.949206
CSA002938.1	171	K	sulfite reductase	3	3	1	0.00314181	70.089	QTFQLHGVLK(1)K	3	-0.90835	1	1	0.00285443	67.519	QTFQLHGVLK(1)K	3	0.49106	1	1	0.00335907	67.519	QTFQLHGVLK(1)K	3	-0.82564	1	1.039	1.002	1.038	1.152	1.148	1.117	0.829	0.91	0.849	1.013	1.006	1.013	0.993	0.962	0.994	1	1.063	1.081	1.02567	0.996024	1.02468	1.16012	1.19335
CSA002938.1	252	K	sulfite reductase	3	3	1	0.000671287	75.088	IMSAEPPHVVK(1)AR	3	-1.9802	1	1	0.0097541	52.463	IMSAEPPHVVK(1)AR	3	-0.42864	2	1	0.00900091	53.448	IMSAEPPHVVK(1)AR	3	-1.1591	1	1.193	1.154	0.985	0.885	0.885	0.947	0.856	0.94	1.175	1.013	1.006	1.013	0.993	0.962	0.994	1	1.063	1.081	1.17769	1.14712	0.972359	0.891239	0.919958
CSA002938.1	519	K	sulfite reductase	3	3	1	0.0036544	93.162	GIPDILK(1)R	2	-1.614	1	1	0.000936398	114.99	GIPDILK(1)R	2	-0.70678	1	1	0.00917295	83.429	GIPDILK(1)R	2	-1.2024	1	1.026	0.949	0.924	1.08	1.074	0.987	0.942	1.093	1.25	1.013	1.006	1.013	0.993	0.962	0.994	1	1.063	1.081	1.01283	0.94334	0.912142	1.08761	1.11642
CSA003060.1	211	K	linoleate 13S-lipoxygenase 2-1, chloroplastic-like	3	3	1	0.000137897	122.39	FETPALVEK(1)DK	2	-1.8577	2	1	0.00118714	77.062	FETPALVEK(1)DK	3	0.066012	1	1	0.000160289	133.32	FETPALVEK(1)DK	2	-0.78032	2	0.749	0.76	0.671	1.189	1.161	1.375	1.345	1.335	1.275	0.615	0.619	0.599	1.045	1.045	1.06	1.483	1.458	1.483	1.21789	1.22779	1.1202	1.1378	1.111
CSA003060.1	538	K	linoleate 13S-lipoxygenase 2-1, chloroplastic-like	3	3	1	0.00316334	82.645	TVGHQDK(1)K	3	-0.53708	1	1	0.00399605	78.113	TVGHQDK(1)K	3	-0.47299	1	1	0.00629665	70.816	TVGHQDK(1)K	3	-0.44292	1	0.512	0.534	0.469	0.725	0.756	0.771	2.368	2.214	2.464	0.615	0.619	0.599	1.045	1.045	1.06	1.483	1.458	1.483	0.83252	0.862682	0.782972	0.69378	0.723445
CSA003072.1	60	K	3-ketoacyl-CoA synthase 19	3	3	1	3.61823e-15	164.9	NK(1)NLGLEEYK	2	-0.040016	1	1	0.00204751	110.31	NK(1)NLGLEEYK	2	0.47306	2	1	0.000814462	124.12	NK(1)NLGLEEYK	2	-0.3768	1	1.106	0.883	1.002	1.568	1.289	1.437	0.191	0.962	0.512	1.038	1.004	1.054	1.459	1.5	1.488	0.452	0.498	0.409	1.06551	0.879482	0.950664	1.07471	0.859333
CSA003072.1	239	K	3-ketoacyl-CoA synthase 19	3	3	1	0.00861723	71.501	HQAILK(1)LK	3	0.18942	2	1	0.00370873	81.296	HQAILK(1)LK	3	0.017323	2	1	0.00718262	71.501	HQAILK(1)LK	3	0.10301	2	0.983	0.926	1.043	1.292	1.24	1.26	0.767	0.943	0.655	1.038	1.004	1.054	1.459	1.5	1.488	0.452	0.498	0.409	0.947013	0.922311	0.989564	0.885538	0.826667
CSA003073.1	319	K	dihydrolipoyl dehydrogenase 2, chloroplastic	3	3	1	0.000958161	75.589	K(1)IDYHTGVFASK	3	0.032371	1	1	0.000779208	75.589	K(1)IDYHTGVFASK	3	0.12991	1	1	0.000198665	90.759	K(1)IDYHTGVFASK	3	0.84953	1	0.873	0.916	0.903	1.176	1.201	1.185	1.119	1.005	1.039	0.818	0.849	0.864	1.046	1.051	1.037	1.17	1.106	1.227	1.06724	1.07892	1.04514	1.12428	1.14272
CSA003078.1	53	K	14-3-3-like protein B	3	3	1	2.96289e-06	98.676	NLLSVGYK(1)NVIGAR	2	-0.94112	1	1	3.12499e-07	97.631	NLLSVGYK(1)NVIGAR	2	1.6407	2	1	1.30648e-08	127.57	NLLSVGYK(1)NVIGAR	3	-1.7487	3	0.702	1.033	0.964	1.138	1.083	1.102	1.498	0.929	1.017	1.106	1.113	1.096	1.074	1.029	1.071	0.736	0.733	0.795	0.63472	0.928122	0.879562	1.05959	1.05248
CSA003078.1	139	K	14-3-3-like protein B	3	3	1	2.18191e-07	141.58	YLAEFK(1)SGNER	2	-1.2177	1	1	0.00194864	96.82	YLAEFK(1)SGNER	2	-0.14598	1	1	0.000498089	125.03	YLAEFK(1)SGNER	3	-1.286	2	1.1	1.158	1.075	1.126	1.091	1.095	0.741	0.694	0.798	1.106	1.113	1.096	1.074	1.029	1.071	0.736	0.733	0.795	0.994575	1.04043	0.980839	1.04842	1.06025
CSA003086.1	151	K	ketol-acid reductoisomerase, chloroplastic	3	3	1	9.08082e-27	179.56	DSLAEAK(1)SDIVVK	2	1.0606	3	1	6.30793e-13	157.68	DSLAEAK(1)SDIVVK	2	0.25478	2	1	8.5918e-23	190.86	DSLAEAK(1)SDIVVK	2	0.83055	2	1.145	1.198	1.199	1.171	1.105	1.151	0.601	0.604	0.473	1.09	1.064	1.076	1.094	1.09	1.088	0.761	0.78	0.798	1.05046	1.12594	1.11431	1.07038	1.01376
CSA003088.1	306	K	3-oxoacyl-[acyl-carrier-protein] reductase 4 isoform X1	3	3	1	0.000734337	113.22	K(1)ILETIPLGR	2	-1.7233	1	1	0.000242603	123.67	K(1)ILETIPLGR	2	0.93758	1	1	0.000573663	124.12	K(1)ILETIPLGR	2	0.49121	1	0.961	0.985	0.987	1.354	1.391	1.331	0.733	0.661	0.677	1.033	1.151	1.141	0.999	1.178	1.212	0.956	0.599	0.563	0.9303	0.855778	0.865031	1.35536	1.18081
CSA003118.1	182	K	triosephosphate isomerase, chloroplastic	3	3	1	7.19329e-36	191.95	HVIGEDDQFIGK(1)K	3	-0.7761	5	1	4.17125e-24	178.67	RHVIGEDDQFIGK(1)K	3	0.20659	7	1	6.32592e-23	190.27	RHVIGEDDQFIGK(1)K	4	-0.74577	5	0.652	0.635	0.574	0.966	0.989	1.03	1.805	1.761	1.917	0.755	0.744	0.732	1.125	1.07	1.041	1.127	1.064	1.243	0.863576	0.853495	0.784153	0.858667	0.924299
CSA003118.1	261	K	triosephosphate isomerase, chloroplastic	3	3	1	2.0263e-10	154.28	K(1)NVSAEVASK	3	0.62524	2	1	7.47008e-07	145.31	K(1)NVSAEVASK	3	1.0576	2	1	0.00037559	131.69	K(1)NVSAEVASK	3	0.96833	2	0.592	0.564	0.594	0.904	0.906	0.873	1.996	1.989	2.076	0.755	0.744	0.732	1.125	1.07	1.041	1.127	1.064	1.243	0.784106	0.758065	0.811475	0.803556	0.846729
CSA003118.1	270	K	triosephosphate isomerase, chloroplastic	3	3	1	8.59734e-08	145.06	NVSAEVASK(1)TR	3	3.0902	3	1	4.71723e-07	144.51	NVSAEVASK(1)TR	3	2.589	2	1	2.13971e-06	156.02	NVSAEVASK(1)TR	2	1.635	1	0.825	0.812	0.767	0.978	1.062	1.062	1.455	1.354	1.475	0.755	0.744	0.732	1.125	1.07	1.041	1.127	1.064	1.243	1.09272	1.0914	1.04781	0.869333	0.992523
CSA003213.1	334	K	thylakoid lumenal 29 kDa protein, chloroplastic	3	3	1	0.0129372	99.442	VDFSK(1)LK	2	2.0403	1	1	0.0392053	80.219	VDFSK(1)LK	2	1.7403	1	1	0.0395524	78.149	VDFSK(1)LK	2	0.46098	1	0.73	0.827	0.779	1.013	0.982	0.944	1.594	1.421	1.603	0.608	0.584	0.562	1.001	0.984	0.97	1.55	1.555	1.567	1.20066	1.4161	1.38612	1.01199	0.997967
CSA003232.1	292	K	elongation factor 1-gamma	3	3	1	0.0028281	100.98	MILDDWK(1)R	2	-0.24753	3	1	0.0206721	74.92	MILDDWK(1)R	2	-0.15548	1	1	0.0035812	96.668	MILDDWK(1)R	2	-0.388	1	1.175	1.215	1.159	0.988	0.985	1.028	0.764	0.713	0.715	1.284	1.259	1.296	0.95	0.952	0.956	0.645	0.659	0.628	0.915109	0.965052	0.89429	1.04	1.03466
CSA003232.1	299	K	elongation factor 1-gamma	3	3	1	1.78755e-06	142.19	LYSNTK(1)TNFR	3	0.33985	3	1	2.37466e-34	208.56	LYSNTK(1)TNFR	2	0.7594	2	1	0.000880919	122.33	LYSNTK(1)TNFR	2	0.39626	2	1.162	1.238	1.239	0.941	0.931	0.975	0.847	0.736	0.614	1.284	1.259	1.296	0.95	0.952	0.956	0.645	0.659	0.628	0.904984	0.98332	0.956019	0.990526	0.977941
CSA003232.1	372	K	elongation factor 1-gamma	3	3	1	0.00597143	103.87	VK(1)GLWLFR	2	0.34085	1	1	0.00160296	111.95	VK(1)GLWLFR	2	-1.306	1	1	0.000800704	121.67	VK(1)GLWLFR	2	-1.2831	1	1.343	1.41	1.342	0.999	0.963	0.919	0.427	0.385	0.474	1.284	1.259	1.296	0.95	0.952	0.956	0.645	0.659	0.628	1.04595	1.11994	1.03549	1.05158	1.01155
CSA003232.1	400	K	elongation factor 1-gamma	3	3	1	1.01707e-05	133.32	K(1)VDLTDEAQK	3	0.36638	3	1	0.000108712	120.53	K(1)VDLTDEAQKER	3	0.77504	3	1	2.64637e-05	144.57	K(1)VDLTDEAQKER	3	-0.022516	5	1.367	1.309	1.208	0.906	0.937	0.925	0.495	0.598	0.743	1.284	1.259	1.296	0.95	0.952	0.956	0.645	0.659	0.628	1.06464	1.03971	0.932099	0.953684	0.984244
CSA003234.1	37	K	transcription factor BTF3 homolog 4	3	3	1	1.03225e-06	144.66	TTTTDDK(1)R	2	-0.9567	1	1	0.00109842	112.11	TTTTDDK(1)R	2	1.7012	2	1	0.000138435	134.77	TTTTDDK(1)R	2	0.79689	1	1.279	1.317	1.288	0.843	0.889	0.86	0.738	0.642	0.664	1.428		1.365	0.899		0.896	0.517		0.607	0.895658		0.94359	0.937709
CSA003339.1	200	K	subtilisin-like protease SBT2.5 isoform X3	3	2	1	0.00288646	88.495	CEVDPDTK(1)R	2	-1.4306	1	1	1.33961e-07	110.53	CEVDPDTK(1)R	2	0.80797	1	1	0.000448344	123.86	CEVDPDTK(1)R	2	-1.4569	1	0.952		0.991	1.088		1.139	1.076		0.917	1.171	0.833	1.023	1.223	1.131	1.251	0.522	1.089	0.697	0.81298		0.968719	0.889616
CSA003360.1	358	K	protein TIC 55, chloroplastic	3	3	1	0.00127171	100.22	FGGTK(1)SSPLAK	2	0.48331	2	1	0.00160777	104.17	FGGTK(1)SSPLAK	2	0.8809	2	1	0.000551076	117.2	FGGTK(1)SSPLAK	2	0.64127	1	0.559	0.622	0.416	1.177	1.104	1.358	1.727	1.652	1.821	0.527	0.546	0.597	1.172	1.14	1.089	1.323	1.433	1.367	1.06072	1.13919	0.696817	1.00427	0.968421
CSA003368.1	205	K	agmatine deiminase	3	3	1	0.000873084	122.79	AYLGVK(1)K	2	1.2126	1	1	0.00556595	100.07	AYLGVK(1)K	2	0.47427	2	1	0.00351249	110.61	AYLGVK(1)K	2	1.7886	2	0.919	0.957	0.889	0.947	0.935	0.933	1.311	1.24	1.39	0.684	0.72	0.655	1.005	1.012	0.981	1.454	1.335	1.534	1.34357	1.32917	1.35725	0.942289	0.923913
CSA003431.1	46	K	fatty-acid-binding protein 1	3	3	1	0.0160151	85.676	K(1)SVLGLK	2	-0.68169	1	1	0.0392661	74.464	K(1)SVLGLK	2	-0.4158	1	1	0.0161943	85.676	K(1)SVLGLK	2	-0.30651	1	0.69	0.792	0.649	1.129	1.055	1.109	1.532	1.4	1.66	0.88	0.894	0.883	1.058	1.036	1.054	1.127	1.118	1.149	0.784091	0.885906	0.734994	1.06711	1.01834
CSA003432.1	107	K	mediator of RNA polymerase II transcription subunit 36a-like	3	3	1	4.69527e-07	122.63	NMVPGEAVYNEK(1)R	2	-1.2033	3	1	4.5237e-07	126.71	NMVPGEAVYNEK(1)R	2	-0.94642	2	1	3.32607e-08	154.65	NMVPGEAVYNEK(1)R	3	-1.8334	4	1.238	1.441	1.318	0.797	0.756	0.794	0.877	0.57	0.684	1.488	1.387	1.389	0.813	0.82	0.806	0.498	0.617	0.645	0.831989	1.03893	0.948884	0.98032	0.921951
CSA003432.1	203	K	mediator of RNA polymerase II transcription subunit 36a-like	3	3	1	2.9062e-14	138.98	DLVNMAK(1)K	2	-0.35469	2	1	0.0020863	87.476	DLVNMAK(1)K	3	1.9759	1	1	0.00430745	83.783	DLVNMAK(1)K	3	-0.3575	3	1.231	1.388	1.188	0.952	0.865	0.919	0.7	0.538	0.792	1.488	1.387	1.389	0.813	0.82	0.806	0.498	0.617	0.645	0.827285	1.00072	0.855292	1.17097	1.05488
CSA003434.1	193	K	mediator of RNA polymerase II transcription subunit 15a-like isoform X1	3	3	1	0.0029881	113.93	NEQLEK(1)LK	2	1.3813	1	1	0.00144181	113.93	NEQLEK(1)LK	2	0.80057	1	1	0.00141054	113.93	NEQLEK(1)LK	2	0.10698	1	1.074	1.178	1.118	0.901	0.868	0.891	1.066	0.916	0.973	1.285			0.924			0.686			0.835798			0.975108
CSA003436.1	82	K	NADP-dependent D-sorbitol-6-phosphate dehydrogenase	3	3	1	0.000550571	123.79	DSLVK(1)FCQK	3	1.4954	2	1	0.000874312	123.79	DSLVK(1)FCQK	2	1.785	2	1	0.00111259	104.22	DSLVK(1)FCQK	3	1.8463	2	1.154	1.172	0.997	1.096	1.118	1.166	0.673	0.638	0.871	1.031	1.013	1.012	1.014	1.008	1.017	0.915	0.951	0.965	1.1193	1.15696	0.985178	1.08087	1.10913
CSA003436.1	124	K	NADP-dependent D-sorbitol-6-phosphate dehydrogenase	3	3	1	0.00409045	116.73	GLAEK(1)YK	2	0.78463	1	1	0.00556975	103.74	GLAEK(1)YK	2	0.044052	1	1	0.00692474	103.74	GLAEK(1)YK	2	-0.092317	1	1.115	1.115	1.087	1.138	1.126	1.076	0.697	0.73	0.801	1.031	1.013	1.012	1.014	1.008	1.017	0.915	0.951	0.965	1.08147	1.10069	1.07411	1.12229	1.11706
CSA003436.1	147	K	NADP-dependent D-sorbitol-6-phosphate dehydrogenase	3	3	1	0.00694844	69.815	GTVVIPK(1)SSK	2	-1.1077	2	1	0.0105182	75.088	GTVVIPK(1)SSK	3	-0.69271	2	1	0.0160139	68.676	GTVVIPK(1)SSK	2	-0.37185	2	0.918	1.023	1.048	1.049	1.017	0.987	1.188	1.024	0.994	1.031	1.013	1.012	1.014	1.008	1.017	0.915	0.951	0.965	0.890398	1.00987	1.03557	1.03452	1.00893
CSA003471.1	30	K	glutathione S-transferase F9	3	3	1	0.0103396	103.74	YYAEK(1)YK	3	0.9198	2	1	0.00497829	116.73	YYAEK(1)YK	3	2.0358	3	1	0.0033459	116.73	YYAEK(1)YK	2	0.44039	1	0.958	0.951	0.901	0.87	0.876	0.894	1.329	1.318	1.415	0.835	0.806	0.9	0.831	0.876	0.912	1.373	1.429	1.232	1.14731	1.1799	1.00111	1.04693	1
CSA003473.1	512	K	4-coumarate--CoA ligase-like 7	3	3	1	7.17577e-12	156.58	FIADQVAPFK(1)R	2	-1.608	1	1	1.37041e-05	131.12	FIADQVAPFK(1)R	2	-0.35714	1	1	0.000336301	128.08	FIADQVAPFK(1)R	2	-1.3082	1	0.91	0.908	0.843	1.276	1.267	1.311	0.926	0.94	1.002	0.762	0.771	0.786	1.021	1.006	1.032	1.264	1.255	1.27	1.19423	1.17769	1.07252	1.24976	1.25944
CSA003479.1	16	K	26S protease regulatory subunit S10B homolog B	3	1	1	0.00181112	94.122	EYAK(1)TEDDLK	2	1.7773	1	1	0.00485718	82.85	EYAK(1)TEDDLK	2	1.6826	1	1	0.000683806	105.65	EYAK(1)TEDDLK	2	1.4323	1		1.106			0.948			0.954		1.18	1.169		0.997	0.995		0.788	0.781			0.946108			0.952764
CSA003481.1	67	K	SUMO-activating enzyme subunit 2	3	1	1	0.0175624	53.751	SHVGQSK(1)AK	3	2.4894	1	1	0.0100373	61.56	SHVGQSK(1)AK	3	2.6633	1	1	0.00170552	80.688	SHVGQSK(1)AK	3	1.8479	2			0.899			1.084			1.178	1.027	1.101	1.111	1.103	1.074	1.098	0.885	0.774	0.779			0.809181
CSA003523.1	320	K	transcription initiation factor TFIID subunit 5	3	3	1	1.91312e-10	142.1	AVEGGK(1)QGASLK(1)K	3	-0.39297	1	1	2.3702e-17	163.8	AVEGGK(1)QGASLK(1)K	2	-1.6917	2	1	7.24735e-11	163.8	AVEGGK(1)QGASLK(1)K	2	-0.4668	2	0.996	1.028	0.963	0.944	0.939	0.925	1.164	1.107	1.248	1.087	1.021	1.042	1.005	0.975	1.007	0.874	0.998	0.935	0.916283	1.00686	0.924184	0.939303	0.963077
CSA003523.1	326	K	transcription initiation factor TFIID subunit 5	3	3	1	1.91312e-10	142.1	AVEGGK(1)QGASLK(1)K	3	-0.39297	1	1	2.3702e-17	163.8	QGASLK(1)K	3	0.87185	3	1	7.24735e-11	163.8	QGASLK(1)K	2	0.94404	3	0.996	1.049	0.938	0.944	0.925	0.956	1.164	1.085	1.26	1.087	1.021	1.042	1.005	0.975	1.007	0.874	0.998	0.935	0.916283	1.02742	0.900192	0.939303	0.948718
CSA003523.1	339	K	transcription initiation factor TFIID subunit 5	3	3	1	0.000107404	131.46	VVGATGK(1)AVR	2	1.8207	2	1	0.00327104	98.898	VVGATGK(1)AVR	2	0.93336	1	1	0.00073293	126.33	VVGATGK(1)AVR	2	1.1869	1	1.041	1.126	1.064	1.096	1.064	0.998	0.892	0.782	0.948	1.087	1.021	1.042	1.005	0.975	1.007	0.874	0.998	0.935	0.957682	1.10284	1.02111	1.09055	1.09128
CSA003557.1	55	K	60S ribosomal protein L21-1	3	3	1	0.000371178	101.46	GMPHK(1)FYHGR	3	2.2088	3	1	0.00100039	79.986	GMPHK(1)FYHGR	4	-0.10476	5	1	0.000501856	92.051	GMPHK(1)FYHGR	3	0.82112	3	1.271	1.32	1.381	0.876	0.812	0.825	0.716	0.724	0.515	1.518	1.576	1.482	0.875	0.879	0.89	0.445	0.332	0.412	0.837286	0.837563	0.931849	1.00114	0.923777
CSA003557.1	69	K	60S ribosomal protein L21-1	3	3	1	0.00026871	120.03	TGQVWNVTK(1)R	3	-1.3617	3	1	0.000723219	116.03	TGQVWNVTK(1)R	3	-1.5981	3	1	0.00068577	112.7	TGQVWNVTK(1)R	2	-0.6722	2	1.363	1.312	1.377	0.872	0.9	0.881	0.543	0.637	0.452	1.518	1.576	1.482	0.875	0.879	0.89	0.445	0.332	0.412	0.897892	0.832487	0.92915	0.996571	1.02389
CSA003557.1	106	K	60S ribosomal protein L21-1	3	3	1	0.0218911	83.647	CTEDFK(1)LR	2	0.73011	1	1	0.000754293	125.16	CTEDFK(1)LR	2	-0.46924	1	1	0.0104722	85.744	CTEDFK(1)LR	2	0.41605	1	1.323	1.585	1.342	0.796	0.764	0.779	0.713	0.298	0.654	1.518	1.576	1.482	0.875	0.879	0.89	0.445	0.332	0.412	0.871542	1.00571	0.905533	0.909714	0.86917
CSA003557.1	129	K	60S ribosomal protein L21-1	3	3	1	0.00222407	106.68	GEVISTK(1)R	2	-0.48458	2	1	0.00126702	109.11	GEVISTK(1)R	3	-0.29819	2	1	0.00829937	83.998	GEVISTK(1)R	3	0.50657	2	1.392	1.235	1.292	0.883	0.984	0.961	0.474	0.677	0.524	1.518	1.576	1.482	0.875	0.879	0.89	0.445	0.332	0.412	0.916996	0.783629	0.871795	1.00914	1.11945
CSA003654.1	262	K	ferredoxin-dependent glutamate synthase, chloroplastic	3	3	1	0.0347023	86.794	NFCK(1)AVK	2	0.25164	1	1	0.00467971	111.01	NFCK(1)AVK	2	-0.20336	1	1	0.0107887	97.798	NFCK(1)AVK	2	-1.0527	1	0.605	0.469	0.463	1.051	1.05	1.09	1.792	1.99	2.068	0.493	0.46	0.461	0.959	0.929	0.94	1.781	1.769	1.8	1.22718	1.01957	1.00434	1.09593	1.13025
CSA003654.1	265	K	ferredoxin-dependent glutamate synthase, chloroplastic	3	3	1	0.00432747	109.66	AVK(1)SGLQK	2	1.3514	1	1	0.00338772	101.65	AVK(1)SGLQK	2	0.26972	2	1	0.0030204	101.65	AVK(1)SGLQK	2	0.52711	2	0.494	0.528	0.451	0.834	0.885	0.825	2.27	2.076	2.43	0.493	0.46	0.461	0.959	0.929	0.94	1.781	1.769	1.8	1.00203	1.14783	0.978308	0.869656	0.952637
CSA003654.1	336	K	ferredoxin-dependent glutamate synthase, chloroplastic	3	2	1	0.00522891	67.081	AFSEDTAK(1)R	3	-0.66246	1	1	0.0193726	66.683	AFSEDTAK(1)R	2	-0.088484	1	1	0.0045208	80.986	AFSEDTAK(1)R	2	-0.96934	1		0.951	0.923		0.993	0.927		1.184	1.328	0.493	0.46	0.461	0.959	0.929	0.94	1.781	1.769	1.8		2.06739	2.00217		1.06889
CSA003654.1	397	K	ferredoxin-dependent glutamate synthase, chloroplastic	3	3	1	5.5661e-05	132.85	DLLEFK(1)SDR	2	0.27387	1	1	1.20392e-05	143.24	DLLEFK(1)SDR	2	0.11205	1	1	0.000418816	127.83	DLLEFK(1)SDR	2	0.017332	1	0.436	0.249	0.321	1.264	1.352	1.324	1.857	2.042	2.059	0.493	0.46	0.461	0.959	0.929	0.94	1.781	1.769	1.8	0.884381	0.541304	0.696312	1.31804	1.45533
CSA003654.1	837	K	ferredoxin-dependent glutamate synthase, chloroplastic	3	3	1	0.00037509	121.99	IAGVVAK(1)K	3	0.92392	3	1	0.0012725	109.01	IAGVVAK(1)K	2	1.7797	2	1	0.00055084	121.99	IAGVVAK(1)K	2	1.3169	2	0.542	0.731	0.541	1.142	1.126	1.109	1.802	1.428	1.881	0.493	0.46	0.461	0.959	0.929	0.94	1.781	1.769	1.8	1.09939	1.58913	1.17354	1.19082	1.21206
CSA003658.1	326	K	ribulose bisphosphate carboxylase/oxygenase activase, chloroplastic isoform X1	3	3	1	0.000522396	98.105	MEK(1)FYWAPTR	2	-2.3072	3	1	0.00127512	114.72	MEK(1)FYWAPTR	2	-0.056086	2	1	0.00130371	107.09	MEK(1)FYWAPTR	2	0.37018	2	0.534	0.414	0.441	1.297	1.438	1.311	1.628	1.639	1.831	0.464	0.519	0.46	1.089	1.097	1.103	1.618	1.574	1.644	1.15086	0.797688	0.958696	1.191	1.31085
CSA003658.1	395	K	ribulose bisphosphate carboxylase/oxygenase activase, chloroplastic isoform X1	3	3	1	6.80137e-20	167.89	WVSGVGVDTIGK(1)K	2	-0.84395	1	1	2.09056e-32	192.4	WVSGVGVDTIGK(1)K	2	-0.51713	1	1	1.89197e-28	167.89	WVSGVGVDTIGK(1)K	2	-0.62909	3	0.286	0.329	0.319	1.462	1.435	1.408	1.908	1.798	1.958	0.464	0.519	0.46	1.089	1.097	1.103	1.618	1.574	1.644	0.616379	0.633911	0.693478	1.34252	1.30811
CSA003662.1	171	K	ribulose bisphosphate carboxylase/oxygenase activase, chloroplastic isoform X2	3	3	1	2.99571e-06	92.265	GQGK(1)SFQCELVFAK	3	1.2757	2	1	1.31667e-46	207.85	GQGK(1)SFQCELVFAK	3	-1.0894	2	1	7.73909e-09	137.61	GQGK(1)SFQCELVFAK	3	-1.7334	2	0.65	0.467	0.517	1.487	2.062	1.883	1.174	0.817	0.942	0.47	0.438	0.418	0.929	0.93	0.922	1.786	1.82	1.856	1.38298	1.06621	1.23684	1.60065	2.2172
CSA003662.1	302	K	ribulose bisphosphate carboxylase/oxygenase activase, chloroplastic isoform X2	3	3	1	4.49326e-10	135.14	MEK(1)FYWAPNREDR	3	1.7043	4	1	6.50582e-06	115.91	MEK(1)FYWAPNREDR	3	-0.9345	5	1	5.88794e-05	103.91	MEK(1)FYWAPNREDR	3	0.5708	5	0.577	0.521	0.478	1.082	1.162	1.123	1.809	1.767	1.995	0.47	0.438	0.418	0.929	0.93	0.922	1.786	1.82	1.856	1.22766	1.1895	1.14354	1.16469	1.24946
CSA003662.1	371	K	ribulose bisphosphate carboxylase/oxygenase activase, chloroplastic isoform X2	3	3	1	5.61198e-20	169.04	WISGAGVDTIGK(1)K	2	0.94576	2	1	4.7403e-10	145.1	WISGAGVDTIGK(1)K	2	-0.20487	2	1	2.17966e-11	167.32	WISGAGVDTIGK(1)K	2	0.66875	3	0.217	0.301	0.309	1.187	1.233	1.151	2.376	2.084	2.308	0.47	0.438	0.418	0.929	0.93	0.922	1.786	1.82	1.856	0.461702	0.687215	0.739234	1.27772	1.32581
CSA003663.1	305	K	D-xylose-proton symporter-like 3, chloroplastic	3	3	1	0.000610309	122.7	GSIQELK(1)EK	3	-2.3983	2	1	0.00261858	111.63	GSIQELK(1)EK	3	-1.032	2	1	0.00108233	111.63	GSIQELK(1)EK	2	0.50112	2	0.575	0.587	0.614	1.102	1.095	1.059	1.788	1.725	1.797	0.522	0.597	0.494	0.875	0.84	0.846	1.794	1.703	1.853	1.10153	0.98325	1.24291	1.25943	1.30357
CSA003688.1	350	K	ferredoxin--NADP reductase, root isozyme, chloroplastic isoform X2	3	3	1	1.72715e-44	213.59	GMMPGIQDTLK(1)R	3	-0.75899	2	1	2.17512e-18	172.76	GMMPGIQDTLK(1)R	2	0.92933	1	1	3.00796e-41	224.25	GMMPGIQDTLK(1)R	3	-1.0401	2	0.765	0.756	0.744	1.023	0.964	1.107	1.515	1.57	1.466	0.878	0.899	0.859	1.057	1	1.093	1.088	1.103	1.096	0.871298	0.840934	0.866123	0.967833	0.964
CSA003707.1	117	K	flavonol synthase/flavanone 3-hydroxylase-like	3	3	1	0.000753584	123.79	MTK(1)NFDEK	3	0.72399	2	1	0.000322912	135.86	MTK(1)NFDEK	2	-1.8616	1	1	0.00164611	112.13	MTK(1)NFDEK	2	-1.2712	1	1.376	1.594	1.622	0.631	0.461	0.463	0.81	0.635	0.481	1.626	1.657	1.586	0.549	0.55	0.596	0.583	0.608	0.623	0.846248	0.961979	1.0227	1.14936	0.838182
CSA003707.1	269	K	flavonol synthase/flavanone 3-hydroxylase-like	3	2	1	0.00250209	94.114	YK(1)SVLHR	3	0.81834	1	1	0.0137332	71.922	YK(1)SVLHR	3	-0.73649	1	1	0.00264882	98.458	YK(1)SVLHR	3	0.68416	1	0.999		0.958	0.919		0.909	1.191		1.279	1.626	1.657	1.586	0.549	0.55	0.596	0.583	0.608	0.623	0.614391		0.604035	1.67395
CSA003724.1	94	K	U1 small nuclear ribonucleoprotein A-like	3	3	1	0.0086661	93.096	TK(1)SDVIAK	2	0.54322	1	1	0.00254252	104.22	TK(1)SDVIAK	2	0.18723	1	1	0.00268279	104.22	TK(1)SDVIAK	2	0.28288	2	1.249	1.318	1.197	0.915	0.886	1.06	0.711	0.641	0.593	1.005	1.105	1.071	0.994	1.044	0.993	1	0.809	0.908	1.24279	1.19276	1.11765	0.920523	0.848659
CSA003732.1	96	K	thylakoid lumenal 15 kDa protein 1, chloroplastic-like isoform X2	3	3	1	0.00323219	108.7	DFSGK(1)SLIK	2	1.7677	1	1	0.000479427	128.01	DFSGK(1)SLIK	2	2.4048	1	1	0.00907987	75.819	DFSGK(1)SLIK	2	2.253	1	0.686	0.632	0.727	1.208	1.151	1.171	1.443	1.58	1.419	0.674	0.661	0.68	1.014	0.901	0.919	1.437	1.576	1.53	1.0178	0.956127	1.06912	1.19132	1.27747
CSA003769.1	105	K	UPF0496 protein At4g34320-like	3	2	1	0.0334586	75.213	VILECK(1)K	2	-1.134	1	1	0.0206236	84.498	VILECK(1)K	2	-1.3514	1	1	0.0211894	82.452	VILECK(1)K	2	-1.2978	1		1.023	0.971		1.336	1.291		0.654	0.764	0.953	0.931	0.939	1.34	1.298	1.233	0.732	0.774	0.833		1.09882	1.03408		1.02928
CSA003801.1	72	K	nucleoside diphosphate kinase 3-like	3	3	1	0.000299032	91.961	QFAQK(1)HYHDLK	4	-0.2867	3	1	0.000637956	84.479	QFAQK(1)HYHDLK	3	-2.5261	2	1	0.000914986	81.92	QFAQK(1)HYHDLK	4	-0.70492	1	0.778	1.048	0.628	1.044	0.875	1.021	1.464	1.145	1.816	0.72	0.735	0.744	1.056	1.135	1.119	1.301	1.22	1.225	1.08056	1.42585	0.844086	0.988636	0.770925
CSA003801.1	78	K	nucleoside diphosphate kinase 3-like	3	3	1	0.0262213	53.751	HYHDLK(1)ER	3	0.48311	1	1	0.00114075	95.358	HYHDLK(1)ER	3	0.24047	1	1	0.0123393	65.404	HYHDLK(1)ER	3	-0.3495	1	0.634	0.55	0.678	1.002	0.797	0.863	1.795	2.139	1.917	0.72	0.735	0.744	1.056	1.135	1.119	1.301	1.22	1.225	0.880556	0.748299	0.91129	0.948864	0.702203
CSA003954.1	69	K	proteasome subunit alpha type-1-B-like	3	3	1	0.000394844	125.03	SQAAK(1)TYLER	2	-2.1059	2	1	0.0019396	110.92	SQAAK(1)TYLER	2	-0.84813	1	1	0.000557559	131.06	SQAAK(1)TYLER	2	-0.90604	3	1.118	1.121	1.017	1.009	1.018	1.047	0.849	0.847	0.98	1.09			1.111			0.755			1.02569			0.908191
CSA003954.1	103	K	proteasome subunit alpha type-1-B-like	3	3	1	0.000715713	120.77	ETLQGEK(1)LK	3	-2.8075	2	1	3.47871e-05	137.89	ETLQGEK(1)LK	3	-2.0582	3	1	3.76374e-13	143.24	ETLQGEK(1)LK	2	-0.91826	2	1.188	1.213	1.153	1.027	1.084	0.875	0.693	0.602	0.921	1.09			1.111			0.755			1.08991			0.924392
CSA003983.1	57	K	probable mitochondrial-processing peptidase subunit beta, mitochondrial	3	3	1	0.00767077	73.248	LAESVK(1)HK	3	0.6982	1	1	0.00410775	79.474	LAESVK(1)HK	3	-1.5541	1	1	0.0152501	61.962	LAESVK(1)HK	3	-0.58944	1	0.989	1.073	1.117	1.119	1.042	0.994	0.965	0.905	0.843	0.991	1.048	1.033	0.949	0.963	0.983	1.039	1.017	1.008	0.997982	1.02385	1.08132	1.17914	1.08204
CSA003983.1	368	K	probable mitochondrial-processing peptidase subunit beta, mitochondrial	3	3	1	3.67753e-06	90.853	NAGGGK(1)HMGSELAQR	3	-0.48372	2	1	4.79084e-08	103.32	NAGGGK(1)HMGSELAQR	3	0.49434	1	1	1.21652e-08	93.243	NAGGGK(1)HMGSELAQR	3	-0.031914	3	0.988	1.069	0.969	1.111	1.088	0.952	0.976	0.859	1.203	0.991	1.048	1.033	0.949	0.963	0.983	1.039	1.017	1.008	0.996973	1.02004	0.938045	1.17071	1.1298
CSA003983.1	572	K	probable mitochondrial-processing peptidase subunit beta, mitochondrial	3	3	1	0.000954251	81.625	IDAVDASTVK(1)R	3	-1.2132	2	1	0.000700348	86.911	IDAVDASTVK(1)R	2	0.76367	2	1	2.02625e-06	154.67	IDAVDASTVK(1)R	2	-0.019078	2	0.994	1.058	1.227	1.143	0.986	0.903	0.926	0.996	0.732	0.991	1.048	1.033	0.949	0.963	0.983	1.039	1.017	1.008	1.00303	1.00954	1.1878	1.20443	1.02388
CSA004015.1	573	K	brefeldin A-inhibited guanine nucleotide-exchange protein 2	3	1	1	0.0135618	56.013	IPDPHSLK(1)K	3	-0.7568	1	1	0.0248901	48.091	IPDPHSLK(1)K	3	-1.0407	1	1	0.00225991	72.607	IPDPHSLK(1)K	3	-1.6681	1			0.988			1.02			1.076	1.001	1.111	1.047	1.016	1.006	1.017	1.004	0.79	0.957			0.943649
CSA004129.1	487	K	UDP-glycosyltransferase 73C2	3	3	1	0.0029345	73.499	LMADEEVHK(1)R	3	-0.71496	2	1	2.09054e-06	138.22	LMADEEVHK(1)R	3	-1.5625	1	1	0.00020722	119.53	LMADEEVHK(1)R	3	-1.676	2	0.834	1.055	1.102	1.084	1.033	0.978	1.307	0.947	0.895	0.875	0.881	0.854	1.029	1.022	1.043	1.05	1.079	1.092	0.953143	1.1975	1.2904	1.05345	1.01076
CSA004159.1	82	K	fumarate hydratase 1, mitochondrial-like, partial	3	3	1	0.000873084	122.79	AFGILK(1)K	3	-2.0793	3	1	0.00696871	97.068	AFGILK(1)K	2	-0.98149	1	1	0.00169329	122.79	AFGILK(1)K	2	-0.57577	2	1.229	1.27	1.295	0.903	0.969	0.941	0.765	0.633	0.543	1.079	1.115	1.083	0.981	1.007	0.981	0.944	0.869	0.881	1.13902	1.13901	1.19575	0.920489	0.962264
CSA004159.1	150	K	fumarate hydratase 1, mitochondrial-like, partial	3	3	1	0.000436467	96.624	AAEILGHK(1)R	3	0.96302	2	1	0.00043495	113.18	AAEILGHK(1)R	3	0.31842	1	1	0.000673596	88.177	AAEILGHK(1)R	3	0.27066	1	1.02	1.16	0.889	0.956	0.964	0.964	1.105	0.839	1.351	1.079	1.115	1.083	0.981	1.007	0.981	0.944	0.869	0.881	0.94532	1.04036	0.820868	0.974516	0.957299
CSA004187.1	58	K	LL-diaminopimelate aminotransferase, chloroplastic-like	3	3	1	0.0334606	69.672	TAYMTK(1)VSR	2	-0.43083	1	1	0.00762366	77.358	TAYMTK(1)VSR	2	-1.7294	1	1	0.00110887	105.13	TAYMTK(1)VSR	2	-0.87267	1	1.003	0.966	0.964	1.052	1.174	1.204	1.02	0.944	0.891	0.947	0.956	0.969	1.239	1.184	1.234	0.771	0.865	0.785	1.05913	1.01046	0.99484	0.849072	0.991554
CSA004269.1	32	K	10 kDa chaperonin-like	3	3	1	5.29007e-05	102.64	TTAGILLPEK(1)SSK	3	0.91572	2	1	9.40622e-05	98.943	TTAGILLPEK(1)SSK	2	1.4789	2	1	3.82161e-06	117.08	TTAGILLPEK(1)SSK	2	0.37704	2	1.268	1.425	1.302	0.831	0.827	0.87	0.779	0.516	0.623	1.204	1.164	1.158	0.921	0.947	0.943	0.795	0.819	0.778	1.05316	1.22423	1.12435	0.90228	0.873284
CSA004322.1	177	K	Dihydrolipoyllysine-residue acetyltransferase component of pyruvate dehydrogenase complex	3	2	1	3.78645e-08	116.52	KIVVTPFAK(1)K	3	-0.12787	3	1	7.16512e-05	90.05	KIVVTPFAK(1)K	3	-0.073172	2	1	3.98839e-06	107.79	KIVVTPFAK(1)K	3	1.3676	2	0.991		0.96	1.326		1.174	0.709		0.936	0.978	1.013	1.075	1.128	1.142	1.074	0.881	0.858	0.889	1.01329		0.893023	1.17553
CSA004322.1	366	K	Dihydrolipoyllysine-residue acetyltransferase component of pyruvate dehydrogenase complex	3	3	0.999739	0.022661	47.991	WKELVEK(1)AR	3	0.31711	1	0.999634	0.0274193	59.198	WKELVEK(1)AR	3	0.64676	1	1	0.0123503	96.027	ELVEK(1)AR	2	-1.1473	1	0.947	0.889	0.929	1.151	1.166	1.154	1.007	1.096	1.025	0.978	1.013	1.075	1.128	1.142	1.074	0.881	0.858	0.889	0.968303	0.877591	0.864186	1.02039	1.02102
CSA004395.1	86	K	succinate dehydrogenase	3	3	1	2.6637e-17	167.89	IK(1)NEIDPTLTFR	2	1.8976	2	1	0.00123923	86.756	IK(1)NEIDPTLTFR	2	1.776	2	1	1.80718e-05	116.63	IK(1)NEIDPTLTFR	2	0.80522	1	0.977	0.868	0.991	0.972	0.894	1.12	1.167	1.448	0.942	1.011	1.023	1.005	0.937	0.946	0.925	1.033	1.026	1.074	0.96637	0.848485	0.98607	1.03735	0.945032
CSA004413.1	298	K	O-acyltransferase WSD1-like	3	3	1	3.06739e-09	122.33	ETGHENELNK(1)SNSK	3	-0.07658	1	1	1.04658e-13	143.05	ETGHENELNK(1)SNSK	3	0.56594	1	1	3.06078e-09	123.72	ETGHENELNK(1)SNSK	3	0.87205	1	1.042	1.02	1.037	1.465	1.551	1.472	0.441	0.409	0.396	0.969	0.983	0.972	1.693	1.596	1.633	0.338	0.357	0.313	1.07534	1.03764	1.06687	0.865328	0.971805
CSA004426.1	237	K	adenosylhomocysteinase	3	3	1	0.000224218	128.85	SK(1)FDNLYGCR	2	0.79218	1	1	1.01839e-12	163.46	SK(1)FDNLYGCR	2	0.77289	1	1	0.000639896	128.85	SK(1)FDNLYGCR	2	-0.77756	2	1.576	1.546	1.303	0.719	0.786	0.929	0.315	0.344	0.543	1.482	1.435	1.527	0.858	0.863	0.826	0.451	0.559	0.434	1.06343	1.07735	0.853307	0.837995	0.910776
CSA004488.1	418	K	stem-specific protein TSJT1	3	3	1	0.00432747	109.66	SYENPK(1)NK	3	-0.27415	2	1	0.0011904	117.01	SYENPK(1)NK	2	-0.67041	2	1	0.000206053	134.25	SYENPK(1)NK	2	0.66581	2	0.905	0.915	0.822	1.159	1.205	1.245	1.079	1.001	1.128	0.855	0.907	0.921	1.119	1.123	1.094	1.034	1.018	0.995	1.05848	1.00882	0.892508	1.03575	1.07302
CSA004504.1	294	K	beta-glucosidase 44-like	3	3	1	0.00273116	107.09	SK(1)ADNYAAQR	2	-3.3485	2	1	0.00352225	94.538	SK(1)ADNYAAQR	2	-1.0314	1	1	5.37077e-06	151.13	SK(1)ADNYAAQR	2	-2.009	3	1.034	1.017	1.009	1.367	1.354	1.328	0.576	0.644	0.637	0.986	1.002	1.017	1.238	1.334	1.294	0.744	0.67	0.718	1.04868	1.01497	0.992134	1.1042	1.01499
CSA004504.1	458	K	beta-glucosidase 44-like	3	3	1	0.00130288	113.62	AYLTQLK(1)K	2	0.2099	1	1	0.0010132	113.62	AYLTQLK(1)K	2	1.2441	2	1	0.00102161	113.62	AYLTQLK(1)K	2	1.227	1	1.045	0.93	0.979	1.345	1.208	1.235	0.581	0.971	0.82	0.986	1.002	1.017	1.238	1.334	1.294	0.744	0.67	0.718	1.05984	0.928144	0.962635	1.08643	0.905547
CSA004532.1	113	K	chlorophyll a-b binding protein CP26, chloroplastic	3	3	1	0.0154585	86.136	K(1)PDDFAK	2	0.61465	1	1	0.0188449	85.676	K(1)PDDFAK	2	0.50911	1	1	0.0279146	78.113	K(1)PDDFAK	3	1.9384	2	0.3	0.296	0.589	0.58	0.494	0.742	2.956	2.954	2.254	0.469	0.439	0.46	0.668	0.661	0.698	1.977	2.166	2.045	0.639659	0.67426	1.28043	0.868263	0.747352
CSA004532.1	215	K	chlorophyll a-b binding protein CP26, chloroplastic	3	3	1	4.4714e-05	130.1	DPDQAAILK(1)VK	2	-2.1077	2	1	0.00118511	109	DPDQAAILK(1)VK	2	-0.7131	2	1	0.00053629	119.39	DPDQAAILK(1)VK	3	-3.9053	3	0.45	0.531	0.571	0.882	0.912	0.881	2.3	2.04	2.109	0.469	0.439	0.46	0.668	0.661	0.698	1.977	2.166	2.045	0.959488	1.20957	1.2413	1.32036	1.37973
CSA004619.1	46	K	60S ribosomal protein L10a	3	3	1	3.8528e-10	139.3	EAITQIANDAK(1)EK	3	-0.32081	1	1	5.34593e-54	221.59	EAITQIANDAK(1)EK	2	2.9856	2	1	1.55147e-06	113.76	EAITQIANDAK(1)EK	3	0.19213	1	1.14	1.324	1.18	1.066	0.995	1.089	0.738	0.503	0.592	1.275	1.305	1.22	0.993	0.943	0.967	0.631	0.652	0.686	0.894118	1.01456	0.967213	1.07351	1.05514
CSA004619.1	215	K	60S ribosomal protein L10a	3	3	1	0.0205964	81.89	K(1)NWQNVR	2	0.74514	2	1	0.0133784	89.296	K(1)NWQNVR	3	-1.6218	2	1	0.000124201	143.23	K(1)NWQNVR	2	1.6328	1	1.395	1.437	1.297	0.908	0.893	0.886	0.434	0.419	0.609	1.275	1.305	1.22	0.993	0.943	0.967	0.631	0.652	0.686	1.09412	1.10115	1.06311	0.914401	0.946978
CSA004763.1	63	K	ribulose bisphosphate carboxylase small chain, chloroplastic-like	3	3	1	2.61779e-06	133.86	VWPPLGLK(1)K	2	-3.2363	10	1	0.000319263	122.52	VWPPLGLK(1)K	3	-0.42713	8	1	0.000225578	122.52	VWPPLGLK(1)K	2	1.0433	15	0.341	0.403	0.268	0.893	0.899	0.887	2.495	2.287	2.729	0.36	0.469	0.424	0.857	0.859	0.855	1.861	1.917	1.962	0.947222	0.859275	0.632075	1.04201	1.04657
CSA004763.1	110	K	ribulose bisphosphate carboxylase small chain, chloroplastic-like	3	3	1	1.59355e-24	183.81	EHNK(1)SPGYYDGR	3	0.79149	6	1	3.45032e-12	155.43	EHNK(1)SPGYYDGR	2	0.44745	6	1	1.02556e-05	140.31	EHNK(1)SPGYYDGR	3	0.10257	7	0.412	0.365	0.419	1.057	0.944	0.964	2.157	2.303	2.32	0.36	0.469	0.424	0.857	0.859	0.855	1.861	1.917	1.962	1.14444	0.778252	0.988208	1.23337	1.09895
CSA004763.1	144	K	ribulose bisphosphate carboxylase small chain, chloroplastic-like	3	3	1	2.10244e-11	124.5	EVEECK(1)K	2	-2.376	11	1	0.00335112	114.28	EVEECK(1)K	2	-2.1009	10	1	0.00435763	106.36	EVEECK(1)K	2	-0.73342	10	0.323	0.307	0.321	0.718	0.727	0.732	2.744	2.662	2.817	0.36	0.469	0.424	0.857	0.859	0.855	1.861	1.917	1.962	0.897222	0.654584	0.757075	0.837806	0.846333
CSA004763.1	160	K	ribulose bisphosphate carboxylase small chain, chloroplastic-like	3	3	1	3.71529e-15	170.3	IIGFDNK(1)R	2	-1.1784	30	1	2.24438e-06	153.04	IIGFDNK(1)R	2	-0.25638	12	1	1.62554e-10	169.12	IIGFDNK(1)R	2	-0.36143	29	0.368	0.508	0.431	1.104	1.084	1.109	2.185	1.882	2.108	0.36	0.469	0.424	0.857	0.859	0.855	1.861	1.917	1.962	1.02222	1.08316	1.01651	1.28821	1.26193
CSA004796.1	59	K	uncharacterized protein LOC102631030	3	3	1	0.000631429	120.06	ETGFVWLK(1)QK	3	-0.55576	2	1	0.000188422	128.01	ETGFVWLK(1)QK	2	1.2664	2	1	0.00070435	122.69	ETGFVWLK(1)QK	2	0.42238	2	0.991	0.966	0.903	1.69	1.529	1.469	0.264	0.531	0.677	0.866	0.86	0.901	1.51	1.546	1.488	0.602	0.551	0.494	1.14434	1.12326	1.00222	1.11921	0.989004
CSA004796.1	63	K	uncharacterized protein LOC102631030	3	3	0.947356	0.0324723	50.108	K(0.947)TEHK(0.053)FEK	4	-0.32603	1	0.831493	0.0206584	56.404	K(0.831)TEHK(0.169)FEK	4	-0.45598	1	0.992989	0.0198414	59.067	K(0.993)TEHK(0.007)FEK	4	0.077756	1	0.912	0.977	0.875	1.677	1.614	1.779	0.431	0.415	0.337	0.866	0.86	0.901	1.51	1.546	1.488	0.602	0.551	0.494	1.05312	1.13605	0.971143	1.1106	1.04398
CSA004796.1	67	K	uncharacterized protein LOC102631030	3	3	1	9.70432e-05	74.611	TEHK(1)FEK(1)IGK	3	0.0028766	2	1	0.00918524	79.148	TEHK(1)FEK(1)IGK	3	1.385	3	1	0.00136422	91.961	TEHK(1)FEK(1)IGK	3	1.5591	1	0.983	1.028	0.903	1.622	1.463	1.449	0.363	0.497	0.702	0.866	0.86	0.901	1.51	1.546	1.488	0.602	0.551	0.494	1.1351	1.19535	1.00222	1.07417	0.946313
CSA004796.1	70	K	uncharacterized protein LOC102631030	3	2	1	9.70432e-05	74.611	TEHK(1)FEK(1)IGK	3	0.0028766	1	1	0.0133652	74.611	TEHK(1)FEK(1)IGK	3	1.385	1	1	0.00136422	91.961	TEHK(1)FEK(1)IGK	3	1.5591	1		1.073	0.903		1.231	1.449		0.686	0.702	0.866	0.86	0.901	1.51	1.546	1.488	0.602	0.551	0.494		1.24767	1.00222		0.796248
CSA004830.1	96	K	dolichyl-diphosphooligosaccharide--protein glycosyltransferase subunit 1B	3	3	1	0.00166746	91.961	K(1)SYLPLDVK	2	0.62451	1	1	0.00266954	95.094	K(1)SYLPLDVK	2	2.0806	1	1	0.000751697	115.33	K(1)SYLPLDVK	3	0.0081599	2	1.034	1.044	1.212	1.1	1.013	1.115	0.902	0.989	0.492	1.11	1.117	1.105	1.073	1.097	1.06	0.745	0.742	0.777	0.931532	0.934646	1.09683	1.02516	0.923428
CSA004830.1	317	K	dolichyl-diphosphooligosaccharide--protein glycosyltransferase subunit 1B	3	3	1	0.00130317	93.839	K(1)SELEIEPR	2	-1.5939	1	1	0.00357556	81.625	K(1)SELEIEPR	2	-1.2179	1	1	0.00592217	77.124	K(1)SELEIEPR	2	-1.3068	1	1.126	1.115	1.102	1.066	0.993	1.025	0.767	0.885	0.836	1.11	1.117	1.105	1.073	1.097	1.06	0.745	0.742	0.777	1.01441	0.998209	0.997285	0.993476	0.905196
CSA004830.1	418	K	dolichyl-diphosphooligosaccharide--protein glycosyltransferase subunit 1B	3	3	1	0.00258471	86.898	TVVVLEK(1)K	3	0.61391	2	1	0.00137416	107.21	TVVVLEK(1)K	3	-1.1733	2	1	0.00316671	98.048	TVVVLEK(1)K	3	-0.67509	2	1.124	1.097	1.126	1.169	1.11	1.059	0.643	0.782	0.742	1.11	1.117	1.105	1.073	1.097	1.06	0.745	0.742	0.777	1.01261	0.982095	1.019	1.08947	1.01185
CSA004843.1	361	K	pyruvate dehydrogenase E1 component subunit alpha-3, chloroplastic	3	3	1	0.00617625	88.819	DPISALK(1)R	2	0.51241	1	1	0.000876591	116.05	DPISALK(1)R	2	0.34217	1	1	0.0333298	65.474	DPISALK(1)R	2	0.37227	1	0.977	0.979	0.945	1.189	1.441	1.42	0.902	0.612	0.652	1.089	1.055	1.12	1.237	1.156	1.307	0.662	0.447	0.411	0.897153	0.927962	0.84375	0.961196	1.24654
CSA004843.1	422	K	pyruvate dehydrogenase E1 component subunit alpha-3, chloroplastic	3	3	1	0.00770943	80.245	GFGIGPDGK(1)YR	2	2.9246	1	1	0.00357241	82.954	GFGIGPDGK(1)YR	2	3.1441	3	1	0.000285524	107.03	GFGIGPDGK(1)YR	2	1.0431	3	1.001	1.029	0.967	1.01	1.141	1.11	1.075	0.87	1.005	1.089	1.055	1.12	1.237	1.156	1.307	0.662	0.447	0.411	0.919192	0.975355	0.863393	0.816492	0.987024
CSA004910.1	61	K	peroxisomal and mitochondrial division factor 2	3	3	1	4.73134e-05	131.82	IEALEVEK(1)R	2	1.0301	1	1	0.000879525	119.53	IEALEVEK(1)R	2	-0.66454	1	1	0.000180722	130.98	IEALEVEK(1)R	3	1.1003	2	1.175	1.205	1.211	0.959	0.928	0.937	0.802	0.798	0.724	1.103	1.116	1.086	0.95	0.945	0.984	0.896	0.871	0.887	1.06528	1.07975	1.1151	1.00947	0.982011
CSA004911.1	694	K	serine/threonine-protein phosphatase 7 long form homolog	3	3	1	0.00218903	114.28	DFQQVK(1)K	2	1.1403	1	1	0.0034393	116.73	DFQQVK(1)K	2	0.78249	2	1	0.0285046	77.732	DFQQVK(1)K	2	-0.67087	1	1.319	1.372	1.23	0.726	0.706	0.963	0.806	0.753	0.649	1.335	1.232	1.286	0.95	0.957	0.905	0.588	0.687	0.658	0.988015	1.11364	0.956454	0.764211	0.737722
CSA004930.1	110	K	naringenin,2-oxoglutarate 3-dioxygenase	3	3	1	0.0100573	82.287	FDMSGGK(1)K	2	-0.49238	3	1	0.00234044	101.65	FDMSGGK(1)K	2	-0.52661	1	1	0.00553859	90.15	FDMSGGK(1)K	2	-0.63596	1	1.564	1.706	1.642	0.44	0.359	0.394	0.683	0.551	0.528	1.448	1.441	1.435	0.582	0.602	0.62	0.83	0.814	0.836	1.08011	1.1839	1.14425	0.756014	0.596346
CSA004930.1	216	K	naringenin,2-oxoglutarate 3-dioxygenase	3	3	1	3.08433e-08	140.33	CPQPDLTLGLK(1)R	2	-1.6188	1	1	1.59278e-23	174.46	CPQPDLTLGLK(1)R	3	-0.60407	2	1	6.56393e-23	200.82	CPQPDLTLGLK(1)R	2	-0.010846	2	1.287	1.37	1.248	0.655	0.621	0.7	0.955	0.855	0.949	1.448	1.441	1.435	0.582	0.602	0.62	0.83	0.814	0.836	0.888812	0.950729	0.869686	1.12543	1.03156
CSA004930.1	272	K	naringenin,2-oxoglutarate 3-dioxygenase	3	3	1	3.54449e-16	123.08	FK(1)NADHQAVVNSNCSR	3	-0.97445	2	1	4.46824e-06	79.92	FK(1)NADHQAVVNSNCSR	3	-0.92231	2	1	1.17448e-10	104.78	FK(1)NADHQAVVNSNCSR	3	-0.51236	1	1.2	1.202	1.547	0.782	0.79	0.489	0.967	0.963	0.605	1.448	1.441	1.435	0.582	0.602	0.62	0.83	0.814	0.836	0.828729	0.834143	1.07805	1.34364	1.31229
CSA004930.1	336	K	naringenin,2-oxoglutarate 3-dioxygenase	3	3	1	0.00652802	101.65	DIELAK(1)LK	3	-0.11792	2	1	0.00146659	113.62	DIELAK(1)LK	2	-1.6184	1	1	0.0030204	101.65	DIELAK(1)LK	3	2.0714	3	1.722	1.809	1.553	0.377	0.333	0.486	0.453	0.393	0.593	1.448	1.441	1.435	0.582	0.602	0.62	0.83	0.814	0.836	1.18923	1.25538	1.08223	0.647766	0.553156
CSA004935.1	275	K	26S protease regulatory subunit 8 homolog A	3	3	1	0.000175227	101.2	K(1)IEFPNPNEESR	2	0.84077	1	1	9.7002e-05	105.58	K(1)IEFPNPNEESR	2	-0.049193	1	1	0.00173751	79.875	K(1)IEFPNPNEESR	2	1.2579	1	1.039	1.099	1.12	1.035	1.039	0.926	0.97	0.859	0.923	0.977	0.983	1.035	1.088	1.065	1.058	0.977	0.94	0.935	1.06346	1.11801	1.08213	0.951287	0.975587
CSA004935.1	291	K	26S protease regulatory subunit 8 homolog A	3	2	1	0.000368454	75.652	LDILK(1)IHSR	3	1.6567	1	1	0.000931128	87.568	LDILK(1)IHSR	3	0.2616	2	1	0.000289299	103.69	LDILK(1)IHSR	3	1.5739	2		0.847	1.024		1.05	0.956		1.305	1.085	0.977	0.983	1.035	1.088	1.065	1.058	0.977	0.94	0.935		0.861648	0.989372		0.985915
CSA004982.1	31	K	peptidyl-prolyl cis-trans isomerase CYP40	3	3	1	0.00137414	94.402	DVVPK(1)TAENFR	2	0.68153	1	1	0.00891604	73.881	DVVPK(1)TAENFR	2	0.81503	1	1	0.000143729	102.33	DVVPK(1)TAENFR	2	-0.2537	1	1.147	1.169	1.264	0.921	0.929	0.817	0.901	0.862	0.767		1.239			0.953			0.721			0.943503			0.974816
CSA004989.1	161	K	hydroxyphenylpyruvate reductase-like	3	3	1	0.0203843	73.616	IGLAIAK(1)R	2	2.0376	1	1	0.0135657	79.469	IGLAIAK(1)R	2	-0.15903	2	1	0.00681097	86.472	IGLAIAK(1)R	2	1.8769	1	0.946	0.977	0.959	1.07	1.036	1.007	1.109	1.087	1.153	0.872	0.886	0.889	1.044	0.976	0.956	1.093	1.037	1.144	1.08486	1.10271	1.07874	1.0249	1.06148
CSA005033.1	67	K	S-adenosylmethionine synthase 2	3	3	1	0.000499213	122.7	AAVDYEK(1)IVR	2	-0.97834	2	1	4.56434e-05	131.83	AAVDYEK(1)IVR	2	0.36199	1	1	0.00106849	117.25	AAVDYEK(1)IVR	2	-0.66621	2	1.409	1.394	1.299	0.81	0.828	0.839	0.529	0.572	0.665	1.481	1.509	1.523	0.908	0.898	0.896	0.424	0.399	0.39	0.951384	0.923791	0.852922	0.89207	0.922049
CSA005033.1	157	K	S-adenosylmethionine synthase 2	3	3	1	1.7e-05	94.45	K(1)NGTCPWLRPDGK	3	-0.60196	1	1	1.12812e-05	113.37	K(1)NGTCPWLRPDGK	3	-0.54836	1	1	2.25562e-06	118.52	K(1)NGTCPWLRPDGK	3	-1.3221	1	1.751	1.688	1.551	0.618	0.651	0.728	0.102	0.244	0.289	1.481	1.509	1.523	0.908	0.898	0.896	0.424	0.399	0.39	1.18231	1.11862	1.01838	0.680617	0.724944
CSA005033.1	227	K	S-adenosylmethionine synthase 2	3	3	1	4.8058e-08	102.72	YLDEK(1)TIFHLNPSGR	3	-0.89805	1	1	8.70891e-14	140.22	YLDEK(1)TIFHLNPSGR	3	-1.5471	1	1	1.27478e-12	123.02	YLDEK(1)TIFHLNPSGR	3	-1.0083	1	1.137	1.25	1.374	0.981	1.061	0.862	0.847	0.561	0.484	1.481	1.509	1.523	0.908	0.898	0.896	0.424	0.399	0.39	0.767725	0.828363	0.902167	1.0804	1.18151
CSA005033.1	291	K	S-adenosylmethionine synthase 2	3	3	1	4.01264e-09	134.37	QAAK(1)SIVASGLAR	3	0.31561	2	1	1.97362e-24	184.02	QAAK(1)SIVASGLAR	3	1.2912	2	1	8.57012e-08	150.34	QAAK(1)SIVASGLAR	3	0.99232	2	1.325	1.291	1.257	0.86	0.872	0.822	0.631	0.706	0.774	1.481	1.509	1.523	0.908	0.898	0.896	0.424	0.399	0.39	0.894666	0.855533	0.825345	0.947137	0.971047
CSA005033.1	335	K	S-adenosylmethionine synthase 2	3	3	1	0.0202099	91.853	EILK(1)IVK	2	-0.7423	1	1	2.3273e-05	103.74	EILK(1)IVK	2	-0.84831	2	1	7.32278e-11	107.65	EILK(1)IVK	2	-0.69052	2	1.252	1.159	1.049	1.031	1.103	1.055	0.563	0.679	0.905	1.481	1.509	1.523	0.908	0.898	0.896	0.424	0.399	0.39	0.845375	0.768058	0.688772	1.13546	1.22829
CSA005033.1	364	K	S-adenosylmethionine synthase 2	3	3	1	2.04108e-31	158.11	FLK(1)TAAYGHFGR	2	0.085018	5	1	5.63796e-50	179.67	FLK(1)TAAYGHFGR	2	-1.0749	4	1	2.10112e-27	158.11	FLK(1)TAAYGHFGR	2	-1.2683	4	0.934	0.979	1.132	1.115	0.983	0.979	1.076	1.144	0.832	1.481	1.509	1.523	0.908	0.898	0.896	0.424	0.399	0.39	0.630655	0.648774	0.74327	1.22797	1.09465
CSA005059.1	111	K	putative lactoylglutathione lyase isoform X2	3	3	1	0.00652802	101.65	LVEDIK(1)AK	2	0.125	1	1	0.00164301	111.46	LVEDIK(1)AK	2	-0.85428	1	1	0.00786346	90.15	LVEDIK(1)AK	2	-0.74045	2	1.037	1.086	0.944	1.15	1.177	1.15	0.836	0.725	0.999	0.923	1.035	0.966	1.056	1.063	1.054	1.14	0.894	0.983	1.12351	1.04928	0.977226	1.08902	1.10724
CSA005059.1	178	K	putative lactoylglutathione lyase isoform X2	3	3	1	0.00535028	106.36	ALGMK(1)LLK	2	0.1938	1	1	0.00193286	107.9	ALGMK(1)LLK	2	0.9904	1	1	0.000295966	130.27	ALGMK(1)LLK	2	0.98444	2	1.079	0.996	0.987	1.14	1.134	1.13	0.765	0.936	0.938	0.923	1.035	0.966	1.056	1.063	1.054	1.14	0.894	0.983	1.16901	0.962319	1.02174	1.07955	1.06679
CSA005059.1	182	K	putative lactoylglutathione lyase isoform X2	3	3	1	0.00309992	80.688	K(1)TDRPEQK	3	-1.6433	1	1	0.000749983	111.61	K(1)TDRPEQK	3	-1.2116	1	1	0.00497768	87.639	K(1)TDRPEQK	3	-1.1607	1	0.925	0.95	0.906	1.079	1.046	1.051	1.138	1.123	1.206	0.923	1.035	0.966	1.056	1.063	1.054	1.14	0.894	0.983	1.00217	0.917874	0.937888	1.02178	0.984008
CSA005097.1	7	K	probable histone H2A variant 3	3	3	1	4.95163e-06	136.57	SGK(1)GAK(1)GLIMGK	2	-0.78525	8	1	4.92162e-05	133.13	SGK(1)GAK(1)GLIMGK	2	0.047097	12	1	6.4538e-06	123.86	SGK(1)GAK(1)GLIMGK	2	0.53925	9	0.938	0.961	0.957	1.307	1.254	1.35	0.834	0.86	0.718
CSA005097.1	13	K	probable histone H2A variant 3	3	2	1	0.000271997	84.753	GAK(1)GLIMGK(1)TPSK	3	-2.0798	1	1	0.00127304	81.904	GAK(1)GLIMGK(1)TPSK	3	-0.95527	3	1	1.07847e-05	120.92	GAK(1)GLIMGK(1)TPSK	3	-1.0119	2		0.83	0.813		1.005	1.611		1.389	0.68
CSA005116.1	38	K	fructose-bisphosphate aldolase, cytoplasmic isozyme 1	3	3	1	3.5764e-91	246.96	GILAADESTGTIGK(1)R	2	0.49583	2	1	2.76025e-28	174.24	GILAADESTGTIGK(1)R	2	0.18684	2	1	5.99267e-37	214.45	GILAADESTGTIGK(1)R	2	-0.19258	2	0.316	0.205	0.339	0.823	0.918	0.852	2.629	2.624	2.629	0.252	0.369	0.321	0.824	0.853	0.811	2.197	2.009	2.139	1.25397	0.555556	1.05607	0.998786	1.0762
CSA005116.1	103	K	fructose-bisphosphate aldolase, cytoplasmic isozyme 1	3	3	1	8.50471e-05	118.2	ENNVIPGIK(1)VDK	2	1.478	1	1	1.1503e-16	160.78	ENNVIPGIK(1)VDK	2	-1.1404	1	1	0.00112149	88.561	ENNVIPGIK(1)VDK	2	-0.45295	1	0.225	0.152	0.143	0.747	0.685	0.65	2.896	2.992	3.29	0.252	0.369	0.321	0.824	0.853	0.811	2.197	2.009	2.139	0.892857	0.411924	0.445483	0.906553	0.803048
CSA005116.1	306	K	fructose-bisphosphate aldolase, cytoplasmic isozyme 1	3	2	1	9.98119e-09	133.15	ALQQSTLK(1)TWGGK	3	0.95191	2	1	1.93955e-09	133.15	ALQQSTLK(1)TWGGK	3	0.89284	1	1	1.4936e-06	129.37	ALQQSTLK(1)TWGGK	3	-0.43156	1	0.664	0.764		0.981	1.01		1.762	1.503		0.252	0.369	0.321	0.824	0.853	0.811	2.197	2.009	2.139	2.63492	2.07046		1.19053	1.18406
CSA005189.1	221	K	protein argonaute 4-like isoform X2	3	3	1	0.000423392	92.428	RPYQSK(1)TFK	3	-0.39765	1	1	0.00249077	79.659	RPYQSK(1)TFK	3	1.1752	1	1	0.000142956	130.98	RPYQSK(1)TFK	3	0.99178	1	1.433	1.475	1.439	0.914	0.898	0.913	0.355	0.341	0.284	1.332	1.354	1.407	0.946	0.926	0.935	0.582	0.562	0.518	1.07583	1.08936	1.02274	0.966173	0.969762
CSA005189.1	383	K	protein argonaute 4-like isoform X2	3	3	1	0.00225293	113.22	EQMFSLK(1)QK	2	3.3367	1	1	0.000815375	124.42	EQMFSLK(1)QK	2	2.5491	2	1	0.00770943	64.82	EQMFSLK(1)QK	3	0.74502	1	1.263	1.459	1.15	0.897	0.887	0.969	0.706	0.383	0.807	1.332	1.354	1.407	0.946	0.926	0.935	0.582	0.562	0.518	0.948198	1.07755	0.817342	0.948203	0.957883
CSA005189.1	626	K	protein argonaute 4-like isoform X2	3	3	1	0.0179292	64.121	K(1)NSDLYGPWK	2	2.5834	1	1	0.0128014	69.815	K(1)NSDLYGPWK	2	1.7537	1	1	0.00584714	75.739	K(1)NSDLYGPWK	2	1.1121	1	1.43	1.538	1.445	0.956	0.857	0.907	0.311	0.276	0.278	1.332	1.354	1.407	0.946	0.926	0.935	0.582	0.562	0.518	1.07357	1.13589	1.02701	1.01057	0.925486
CSA005189.1	747	K	protein argonaute 4-like isoform X2	3	2	1	1.25986e-06	138.76	VEMIDSLYK(1)R	2	3.2172	1	1	9.97434e-06	136.02	VEMIDSLYK(1)R	3	0.26648	2	1	0.00108165	82.029	VEMIDSLYK(1)R	3	0.41861	1	1.164	1.07		1.03	1		0.734	0.957		1.332	1.354	1.407	0.946	0.926	0.935	0.582	0.562	0.518	0.873874	0.790251		1.08879	1.07991
CSA005189.1	822	K	protein argonaute 4-like isoform X2	3	3	1	7.711e-07	113.24	FVVIVAQK(1)NHHTK	4	-0.20187	2	1	0.000176667	81.565	FVVIVAQK(1)NHHTK	4	-0.83928	2	1	2.75902e-06	107.17	FVVIVAQK(1)NHHTK	4	0.11129	1	1.077	1.037	1.097	0.878	0.999	1.109	1.089	1.02	0.736	1.332	1.354	1.407	0.946	0.926	0.935	0.582	0.562	0.518	0.808559	0.765879	0.779673	0.928118	1.07883
CSA005224.1	362	K	preprotein translocase subunit SCY1, chloroplastic-like isoform X1	3	3	1	0.00154347	105.98	FTGLAALK(1)K	3	-1.6594	2	1	0.00263729	98.048	FTGLAALK(1)K	3	-0.77907	2	1	0.000686666	117.7	FTGLAALK(1)K	2	0.68213	2	0.691	0.77	0.714	1.484	1.357	1.387	1.097	1.089	1.172	0.74	0.763	0.717	1.048	1.048	1.006	1.329	1.244	1.385	0.933784	1.00917	0.995816	1.41603	1.29485
CSA005242.1	235	K	aldehyde dehydrogenase family 3 member F1-like	3	3	1	0.000408139	111.46	IINK(1)HHFLR	3	0.68346	3	1	0.000895276	85.676	IINK(1)HHFLR	4	-0.71376	2	1	0.000280376	112.11	IINK(1)HHFLR	3	-0.67178	2	0.814	0.873	0.826	1.331	1.135	1.24	1.044	1.16	1.128	0.633	0.605	0.587	1.43	1.388	1.435	1.125	1.131	1.131	1.28594	1.44298	1.40716	0.930769	0.817723
CSA005272.1	37	K	ATP synthase subunit epsilon, mitochondrial	3	3	0.999999	4.44849e-12	140.46	NCLKEPYK(1)SEALAR	3	-0.55081	1	0.994953	0.00864759	60.196	NCLK(0.005)EPYK(0.995)SEALAR	3	0.25926	1	0.999985	5.24792e-06	93.909	NCLKEPYK(1)SEALAR	3	0.92934	1	1.05	1.083	1.027	0.988	0.975	1.056	1.008	0.965	0.949
CSA005296.1	638	K	ubiquitin carboxyl-terminal hydrolase 12 isoform X1	3	3	1	9.04237e-09	141.73	EVSNK(1)THNAELK	3	2.2933	1	1	1.47747e-05	112.44	EVSNK(1)THNAELK	3	0.31336	1	1	8.32233e-16	175.74	EVSNK(1)THNAELK	3	1.5172	1	1.004	1.043	1.024	1.159	1.111	1.117	0.887	0.879	0.877	1.079	1.073	1.061	1.058	1.104	1.066	0.81	0.776	0.821	0.930491	0.972041	0.965127	1.09546	1.00634
CSA005356.1	882	K	ubiquitin-activating enzyme E1 1-like	3	3	1	0.0136876	71.296	LEICHK(1)K	3	0.16371	1	1	0.00627262	82.671	LEICHK(1)K	3	-1.0719	1	1	0.0152983	67.032	LEICHK(1)K	3	-0.75964	1	1.418	1.496	1.307	0.878	0.827	0.927	0.429	0.388	0.536	1.13	1.177	1.148	0.92	0.884	0.912	0.923	0.867	0.863	1.25487	1.27103	1.1385	0.954348	0.93552
CSA005372.1	63	K	U1 small nuclear ribonucleoprotein A isoform X1	3	3	0.999825	0.00396587	60.55	SRFDDEKPGLEK(1)R	4	1.0153	1	0.999887	0.0014388	85.813	FDDEKPGLEK(1)R	3	0.82143	1	0.99999	0.00146384	85.554	FDDEKPGLEK(1)R	3	1.9011	1	0.705	0.896	0.99	1.224	1.108	0.962	1.387	1.152	1.145	1.223	1.167		0.934	0.881		0.762	0.897		0.576451	0.767781		1.31049	1.25766
CSA005373.1	221	K	CBS domain-containing protein CBSX1, chloroplastic-like	3	3	1	0.00526401	106.68	LLLETK(1)YR	2	0.7019	1	1	0.021561	78.113	LLLETK(1)YR	2	0.37085	1	1	0.00564301	95.358	LLLETK(1)YR	2	0.43907	1	0.787	0.781	0.792	1.186	1.085	1.175	1.274	1.383	1.281	0.814	0.906	0.872	1.115	1.073	1.05	1.144	1.053	1.095	0.96683	0.862031	0.908257	1.06368	1.01118
CSA005378.1	308	K	dolichyl-diphosphooligosaccharide--protein glycosyltransferase subunit 1A	3	3	1	0.00138866	98.156	K(1)TQLEIEPR	2	-0.058747	1	1	0.00300918	88.338	K(1)TQLEIEPR	2	0.77879	1	1	0.00144939	95.477	K(1)TQLEIEPR	2	1.3842	1	1.02	1.093	1.065	1.087	1.082	1.055	0.943	0.82	0.873	1.138	1.164	1.135	1.069	1.053	1.076	0.703	0.721	0.693	0.896309	0.939003	0.938326	1.01684	1.02754
CSA005378.1	345	K	dolichyl-diphosphooligosaccharide--protein glycosyltransferase subunit 1A	3	3	1	0.00070803	113.61	DFLFQTEGK(1)R	2	2.8108	1	1	0.00218864	100.69	DFLFQTEGK(1)R	2	-1.3848	1	1	9.72166e-10	166.29	DFLFQTEGK(1)R	2	1.0709	1	0.967	0.904	1.093	0.865	0.927	1.031	1.317	1.347	0.843	1.138	1.164	1.135	1.069	1.053	1.076	0.703	0.721	0.693	0.849736	0.776632	0.962996	0.809167	0.880342
CSA005379.1	104	K	dolichyl-diphosphooligosaccharide--protein glycosyltransferase subunit 1A	3	3	1	0.00349174	102.53	VEELVVK(1)ER	2	-1.8654	1	1	0.00541562	79.659	VEELVVK(1)ER	2	0.45922	1	1	0.00327209	87.713	VEELVVK(1)ER	2	-1.5134	1	1.209	1.283	1.194	1.016	0.981	1.055	0.665	0.595	0.606	1.046	1.085	1.061	0.959	1.059	1.012	0.916	0.874	0.892	1.15583	1.18249	1.12535	1.05944	0.926346
CSA005405.1	61	K	very-long-chain enoyl-CoA reductase isoform X1	3	0	0.999999	0.000504858	70.195	EKPIALNYK(1)K	3	0.2304	2	1	3.74033e-12	114.86	EKPIALNYK(1)K	3	-0.45734	3	1	9.38997e-07	96.229	EKPIALNYK(1)K	3	-0.65625	1										0.95	0.948	0.953	1.216	1.255	1.291	0.794	0.828	0.766
CSA005422.1	190	K	DEAD-box ATP-dependent RNA helicase 56 isoform X1	3	3	0.99999	0.00443272	65.179	DKDLSLK(1)NVR	3	-1.246	1	0.999984	0.00848842	69.864	DKDLSLK(1)NVR	3	-1.3732	1	0.999731	0.0139329	65.232	DKDLSLK(1)NVR	3	-1.0499	1	1.062	1.085	1.041	1.053	1.102	1.101	0.904	0.813	0.863	1.044	1.004		1.021	1.044		0.917	0.924		1.01724	1.08068		1.03134	1.05556
CSA005446.1	486	K	glutamate--tRNA ligase, chloroplastic/mitochondrial	3	3	1	0.0017889	70.563	VNK(1)SGAIFDSTK	3	-0.34858	1	1	6.45991e-09	142.45	VNK(1)SGAIFDSTK	3	-1.0438	2	1	0.000104086	97.463	VNK(1)SGAIFDSTK	3	-2.0165	1	0.807	0.914	0.869	1.253	1.325	1.26	1.154	0.863	1.014	0.795	0.797	0.828	1.322	1.266	1.24	0.979	1.026	0.979	1.01509	1.1468	1.04952	0.947806	1.0466
CSA005446.1	495	K	glutamate--tRNA ligase, chloroplastic/mitochondrial	3	3	1	0.000138478	122.34	SGAIFDSTK(1)LR	2	2.3627	1	1	0.0112847	71.558	SGAIFDSTK(1)LR	2	1.0113	1	1	0.000503389	114.24	SGAIFDSTK(1)LR	2	1.6179	1	0.727	0.781	0.7	1.27	1.268	1.437	1.287	1.172	1.135	0.795	0.797	0.828	1.322	1.266	1.24	0.979	1.026	0.979	0.914465	0.979925	0.845411	0.960666	1.00158
CSA005470.1	200	K	proteasome subunit beta type-6	3	3	1	1.97521e-07	135.02	TVIINSEGVK(1)R	2	0.49484	2	1	8.28596e-07	142.12	TVIINSEGVK(1)R	3	-0.75011	2	1	0.000252505	109.44	TVIINSEGVK(1)R	3	-1.4765	2	1.184	1.294	1.066	1.015	1.05	1.115	0.714	0.492	0.793	1.116	1.139	1.1	1.006	1.014	1.021	0.817	0.808	0.834	1.06093	1.13608	0.969091	1.00895	1.0355
CSA005513.1	351	K	anthocyanin 3'-O-beta-glucosyltransferase-like	3	3	1	0.00141096	99.283	SGQGLILK(1)K	2	-0.3957	1	1	0.00286468	90.05	SGQGLILK(1)K	2	0.1826	1	1	0.00103018	99.283	SGQGLILK(1)K	2	0.42811	1	1.292	1.31	1.437	0.719	0.736	0.697	0.866	0.831	0.565	1.229	1.187	1.231	0.867	0.867	0.833	0.867	0.88	0.86	1.05126	1.10362	1.16734	0.829296	0.848904
CSA005523.1	107	K	lactoylglutathione lyase isoform X1	3	3	1	0.00142229	104.39	VLGMSLLK(1)R	2	1.495	1	1	0.00261756	99.855	VLGMSLLK(1)R	2	-0.52828	1	1	0.0048839	79.986	VLGMSLLK(1)R	2	-0.14672	1	0.909	0.906	0.852	1.153	1.18	1.201	1.079	1.047	1.123	0.806	0.791	0.767	1.055	1.052	1.034	1.24	1.253	1.28	1.12779	1.14539	1.11082	1.09289	1.12167
CSA005554.1	79	K	oligouridylate-binding protein 1-like	3	3	1	0.00130251	119.29	ILFGK(1)PIK	3	-0.053035	3	1	0.00121388	116.73	ILFGK(1)PIK	3	0.83603	2	1	0.00240294	106.36	ILFGK(1)PIK	3	0.63675	2	1.226	1.176	1.302	0.877	0.893	0.829	0.802	0.892	0.673	1.197	1.009	1.154	1.002	1.062	0.996	0.743	0.921	0.919	1.02423	1.16551	1.12825	0.87525	0.840866
CSA005568.1	214	K	uncharacterized protein ycf39	3	3	1	0.000748561	123.86	YCTEK(1)FLK	2	0.69012	1	1	0.00163067	111.61	YCTEK(1)FLK	2	-1.7323	1	1	0.00171462	111.61	YCTEK(1)FLK	2	0.16602	2	0.567	0.584	0.568	1.278	1.28	1.209	1.588	1.516	1.7	0.566	0.626	0.613	1.052	1.011	1.033	1.545	1.424	1.461	1.00177	0.932907	0.926591	1.21483	1.26607
CSA005599.1	121	K	stress-response A/B barrel domain-containing protein UP3-like	3	3	1	0.0103396	103.74	VTFLK(1)LK	2	1.6109	2	1	0.00556975	103.74	VTFLK(1)LK	2	-0.35098	2	1	0.00689823	103.83	VTFLK(1)LK	2	0.60889	2	0.844	0.847	0.828	1.115	1.07	1.097	1.252	1.282	1.307	0.89	0.832	0.848	0.986	1.006	1.023	1.173	1.222	1.132	0.948315	1.01803	0.976415	1.13083	1.06362
CSA005626.1	20	K	aldehyde dehydrogenase family 2 member C4	3	2	1	0.000298432	110.38	ILSYIEHGK(1)R	3	-0.44521	1	1	0.00963403	58.592	ILSYIEHGK(1)R	3	-0.084412	1	1	0.00377981	68.525	ILSYIEHGK(1)R	3	0.60547	1	0.929		0.896	0.977		1.033	1.254		1.247
CSA005665.1	39	K	pyruvate kinase 1, cytosolic-like	3	3	1	0.000364077	125.72	IVGTLGPK(1)SR	2	0.18432	1	1	0.0040215	89.266	IVGTLGPK(1)SR	2	0.33073	1	1	0.00156828	94.465	IVGTLGPK(1)SR	2	-0.034881	1	1.039	1.035	1.023	1.202	1.113	1.127	0.767	0.892	0.867	0.918	0.895	0.919	1.089	1.073	1.072	1.015	0.986	1.035	1.13181	1.15642	1.11317	1.10376	1.03728
CSA005731.1	305	K	glutamine--tRNA ligase, cytoplasmic	3	3	1	0.0112227	66.692	EMLEK(1)HLK	3	2.1718	1	1	0.00274977	85.676	EMLEK(1)HLK	3	0.26856	2	1	0.00398953	81.296	EMLEK(1)HLK	3	0.92514	2	1.262	1.073	0.963	0.934	0.946	0.954	0.663	1.019	1.211	1.124	1.104	1.078	0.946	0.952	0.954	0.904	0.931	0.986	1.12278	0.97192	0.893321	0.987315	0.993697
CSA005732.1	80	K	universal stress protein A-like protein	3	3	1	3.57019e-06	138.08	NFQENQK(1)K	2	-0.49257	2	1	0.000310393	132.01	NFQENQK(1)K	2	-0.17252	1	1	9.28564e-06	144.77	NFQENQK(1)K	2	-0.14984	1	0.83	0.831	0.77	1.092	1.081	1.109	1.308	1.298	1.41	0.854	0.789	0.792	1.071	1.059	0.973	1.125	1.342	1.317	0.971897	1.05323	0.972222	1.01961	1.02077
CSA005815.1	546	K	phospholipase D alpha 1	3	3	1	0.00192428	92.781	IVSK(1)IEAGER	2	0.071995	1	1	0.00403159	89.189	IVSK(1)IEAGER	2	0.45897	1	1	0.00266592	87.216	IVSK(1)IEAGER	2	0.26211	1	1.243	1.177	1.207	1.057	1.169	1.105	0.55	0.568	0.515		0.887	0.915		0.877	0.849		1.252	1.281		1.32694	1.31913		1.33295
CSA005888.1	116	K	photosystem II Pbs27 protein	3	3	1	1.94097e-17	173.19	ETSNTWVSK(1)YR	2	1.1477	1	1	4.03938e-14	162.38	ETSNTWVSK(1)YR	2	-0.28063	1	1	6.82015e-83	264.96	ETSNTWVSK(1)YR	2	0.84446	1	0.625	0.643	0.522	0.95	0.951	0.991	1.875	1.791	2.071	0.594	0.555	0.559	0.832	0.821	0.79	1.744	1.782	1.802	1.05219	1.15856	0.93381	1.14183	1.15834
CSA005976.1	131	K	UDP-D-apiose/UDP-D-xylose synthase 2	3	3	1	0.0137381	78.113	YCSENNK(1)R	2	0.61481	1	1	0.0316608	68.846	YCSENNK(1)R	2	1.8668	1	1	1.54264e-06	149.82	YCSENNK(1)R	2	1.0528	1	1.615	1.524	1.557	0.645	0.721	0.656	0.33	0.459	0.368	1.166	1.143	1.174	0.766	0.717	0.684	1.035	1.071	1.098	1.38508	1.33333	1.32624	0.842037	1.00558
CSA006044.1	48	K	glutamine synthetase nodule isozyme	3	3	1	0.00133705	89.46	TLSGPVNDPK(1)K	3	1.3966	2	1	8.68311e-10	153.75	TLSGPVNDPK(1)K	2	0.28258	2	1	0.000347085	125.82	TLSGPVNDPK(1)K	2	0.12451	2	1.355	1.394	1.304	0.894	0.893	0.894	0.53	0.495	0.583	1.431	1.436	1.344	0.904	0.901	0.921	0.555	0.525	0.589	0.94689	0.970752	0.970238	0.988938	0.991121
CSA006044.1	267	K	glutamine synthetase nodule isozyme	3	3	1	0.00147513	102.52	DGGYQVIK(1)K	2	-0.99439	1	1	0.00258843	102.52	DGGYQVIK(1)K	3	-0.064326	2	1	0.000998728	99.568	DGGYQVIK(1)K	3	0.46279	3	1.367	1.37	1.232	0.864	0.901	0.925	0.544	0.528	0.693	1.431	1.436	1.344	0.904	0.901	0.921	0.555	0.525	0.589	0.955276	0.954039	0.916667	0.955752	1
CSA006145.1	225	K	uncharacterized protein LOC107434073	3	3	1	0.00172824	116.73	VVEDVK(1)K	2	1.3344	1	1	0.0103245	91.318	VVEDVK(1)K	2	2.7049	1	1	0.0116231	91.318	VVEDVK(1)K	2	0.618	1	1.409	1.55	1.437	0.638	0.635	0.624	0.738	0.514	0.658	1.466	1.742		0.633	0.475		0.75	0.54		0.961119	0.889782		1.0079	1.33684
CSA006152.1	377	K	hexokinase-1 isoform X1	3	3	1	0.0369453	53.554	VVGSK(1)LK	3	0.36437	1	1	0.0359386	53.554	VVGSK(1)LK	3	-0.16515	1	1	0.01603	91.853	VVGSK(1)LK	2	0.19952	2	0.374	0.431	0.385	0.852	1.027	0.9	2.481	2.088	2.471	0.804	0.827	0.771	1.072	1.038	1.069	1.198	1.188	1.225	0.465174	0.521161	0.499351	0.794776	0.989403
CSA006179.1	5	K	probable cyclic nucleotide-gated ion channel 14	3	3	0.996294	0.0315047	46.426	MEFK(0.004)K(0.996)EK	3	-0.37682	1	0.996294	0.0241081	46.426	MEFK(0.004)K(0.996)EK	3	-0.9165	1	0.996294	0.0320517	46.426	MEFK(0.004)K(0.996)EK	3	-0.25277	1	0.951	0.948	0.986	1.121	0.982	1.03	1.037	1.202	1.067
CSA006256.1	302	K	translation initiation factor IF-2, chloroplastic isoform X2	3	3	1	0.0175575	53.756	EHK(1)PILVDK	3	2.384	1	1	0.0109078	60.717	EHK(1)PILVDK	3	2.2053	1	1	0.0330809	46.001	EHK(1)PILVDK	3	2.5351	1	0.941	0.914	0.873	1.068	1.097	1.002	1.12	1.13	1.335	0.805	0.781	0.747	1.344	1.435	1.391	0.924	0.834	0.846	1.16894	1.17029	1.16867	0.794643	0.76446
CSA006267.1	120	K	protein TRI1-like	3	3	1	6.85479e-08	137.98	KIIVCDEK(1)LK	3	-3.1541	3	1	5.24769e-08	150.61	IIVCDEK(1)LK	2	1.3837	2	1	0.00107295	113.93	IIVCDEK(1)LK	3	0.68315	2	1.145	1.258	1.189	1.157	1.182	1.194	0.617	0.405	0.439	1.057	0.968	0.93	1.159	1.167	1.166	0.924	0.89	0.897	1.08325	1.29959	1.27849	0.998274	1.01285
CSA006267.1	122	K	protein TRI1-like	3	3	1	0.000848534	122.52	LK(1)NIFGGK	2	-0.28787	1	1	0.0186042	80.455	LK(1)NIFGGK	2	0.58332	1	1	0.000837256	121.05	LK(1)NIFGGK	2	0.82886	2	1.172	1.131	1.08	1.227	1.096	1.141	0.479	0.737	0.73	1.057	0.968	0.93	1.159	1.167	1.166	0.924	0.89	0.897	1.1088	1.16839	1.16129	1.05867	0.93916
CSA006340.1	459	K	glucose-6-phosphate 1-dehydrogenase 1, chloroplastic	3	2	1	0.00157682	82.75	HVPGNLYK(1)R	3	-0.75955	1	1	0.000638148	106.94	HVPGNLYK(1)R	3	-1.1369	1	1	0.000229073	110.22	HVPGNLYK(1)R	3	-0.88519	1		1.079	0.984		0.903	1.008		1.057	1.1	0.745	0.741	0.782	1.26	1.257	1.202	1.074	1.092	1.098		1.45614	1.25831		0.718377
CSA006423.1	52	K	probable glutathione S-transferase	3	3	1	0.000466623	73.386	SQLLLEMNPIHK(1)K	3	0.24836	1	1	2.05653e-05	95.981	SQLLLEMNPIHK(1)K	3	0.7477	3	1	7.89783e-07	116.63	SQLLLEMNPIHK(1)K	3	0.17465	3	0.864	0.638	0.715	0.891	1.042	1.063	1.485	1.695	1.582	0.686	0.654	0.681	0.904	0.873	0.91	1.543	1.614	1.587	1.25948	0.975535	1.04993	0.985619	1.19359
CSA006423.1	104	K	probable glutathione S-transferase	3	3	1	0.00150875	104.22	FWADYVDK(1)K	2	0.19119	1	1	0.000990762	96.342	FWADYVDK(1)K	2	0.35285	2	1	1.83102e-06	119.68	FWADYVDK(1)K	2	-1.1621	3	0.691	0.699	0.624	1.164	1.149	1.175	1.488	1.458	1.628	0.686	0.654	0.681	0.904	0.873	0.91	1.543	1.614	1.587	1.00729	1.06881	0.9163	1.28761	1.31615
CSA006423.1	125	K	probable glutathione S-transferase	3	3	1	8.91642e-05	130.01	GEDQEVAK(1)K	3	0.24493	2	1	0.00121186	116.55	GEDQEVAK(1)K	3	-0.0064094	2	1	0.000144472	133.89	GEDQEVAK(1)K	2	-0.52562	2	0.847	0.885	0.957	0.842	0.873	0.853	1.577	1.442	1.354	0.686	0.654	0.681	0.904	0.873	0.91	1.543	1.614	1.587	1.23469	1.35321	1.40529	0.931416	1
CSA006483.1	35	K	V-type proton ATPase subunit D	3	3	1	0.0039567	88.734	GHALLK(1)K	3	0.06736	2	1	0.00429808	79.454	GHALLK(1)K	3	0.83751	2	1	0.00395368	88.734	GHALLK(1)K	3	0.29755	2	1.029	1.057	1.048	1.109	1.286	1.107	0.898	0.65	0.841	0.644	1.151	0.935	0.823	1.01	1.015	1.684	0.78	1.074	1.59783	0.918332	1.12086	1.34751	1.27327
CSA006518.1	98	K	chaperonin CPN60-2, mitochondrial	3	3	1	0.000224218	128.85	VK(1)NVGASLVK	2	0.70592	2	1	0.000157253	128.85	VK(1)NVGASLVK	3	0.69694	3	1	1.23201e-09	167.18	VK(1)NVGASLVK	3	0.557	4	1.23	1.217	1.16	0.921	0.919	0.923	0.74	0.786	0.845	1.043	1.034	1.045	0.913	0.911	0.915	1.056	1.051	1.042	1.17929	1.17698	1.11005	1.00876	1.00878
CSA006518.1	370	K	chaperonin CPN60-2, mitochondrial	3	3	1	4.7661e-06	106.42	DDTLILDGAGDK(1)K	2	-0.50396	2	1	2.47343e-05	92.039	DDTLILDGAGDK(1)K	3	-0.67154	1	1	1.00978e-06	123.28	DDTLILDGAGDK(1)K	3	0.059091	1	1.05	1.088	0.997	0.988	0.999	0.902	1.007	0.928	1.21	1.043	1.034	1.045	0.913	0.911	0.915	1.056	1.051	1.042	1.00671	1.05222	0.954067	1.08215	1.0966
CSA006609.1	64	K	calcium-transporting ATPase 3, endoplasmic reticulum-type-like	3	2	1	0.0173356	66.429	VEPSHK(1)R	3	-0.96974	1	1	0.000973323	104.21	VEPSHK(1)R	3	-1.4151	1	1	0.000698578	116.9	VEPSHK(1)R	3	-0.91483	1		0.865	0.849		1.078	0.931		1.241	1.475
CSA006637.1	15	K	cytochrome b5-like isoform X1	3	2	1	1.69849e-05	116.55	VHLFEEVAK(1)HNK	3	0.75295	2	1	0.000282785	86.114	VHLFEEVAK(1)HNK	3	2.2799	1	1	4.23895e-06	118.28	VHLFEEVAK(1)HNK	4	0.30506	1	1.161		1.079	0.852		1.025	0.959		0.883	1.252	1.176	1.183	0.992	0.982	0.963	0.74	0.775	0.787	0.927316		0.912088	0.858871
CSA006652.1	644	K	UBIQUITIN-SPECIFIC PROTEASE 12 family protein	3	0	1	0.0274625	52.716	HAYEK(1)PVK	3	-1.3964	1	1	0.027241	52.716	HAYEK(1)PVK	3	-2.3399	1	1	0.0408171	45.68	HAYEK(1)PVK	3	-1.8614	1										1.128	1.143	1.067	0.994	1.015	0.976	0.828	0.805	0.921
CSA006668.1	73	K	Glucose-6-phosphate 1-dehydrogenase, cytoplasmic isoform 2	3	3	1	0.00619032	89.266	TK(1)ISDDELR	2	1.8148	1	1	0.00385803	95.477	TK(1)ISDDELR	2	2.066	1	1	0.0011195	102.53	TK(1)ISDDELR	2	0.66002	1	0.84	0.897	0.914	1.027	1.027	1.112	1.366	1.241	1.11	0.383	0.489	0.346	1.095	0.898	1.224	1.753	1.55	1.664	2.19321	1.83436	2.64162	0.9379	1.14365
CSA006671.1	80	K	cyclase-associated protein 1-like	3	2	1	0.016605	93.374	ELLVK(1)VK	2	-1.406	1	1	0.0298521	84.498	ELLVK(1)VK	2	0.67954	1	1	0.0062754	106.04	ELLVK(1)VK	2	0.10688	1	1.148	1.211		0.923	0.873		0.894	0.851		1.227	1.223	1.255	0.938	0.929	0.998	0.711	0.683	0.65	0.935615	0.990188		0.984009	0.93972
CSA006712.1	51	K	probable glutathione S-transferase	3	3	1	0.00280616	111.01	YNPVHK(1)K	2	-0.56626	5	1	0.00662697	97.798	YNPVHK(1)K	3	-0.57745	5	1	0.00327338	111.82	YNPVHK(1)K	3	-0.4571	6	0.311	0.324	0.309	0.899	0.917	0.903	2.546	2.409	2.623
CSA006731.1	35	K	stress-response A/B barrel domain-containing protein At5g22580	3	3	1	0.000124366	85.287	TK(1)EDFTAFLGHPK	3	-1.147	1	1	0.000595532	74.789	TK(1)EDFTAFLGHPK	3	2.6905	1	1	4.46959e-06	102.52	TK(1)EDFTAFLGHPK	3	0.16476	1	1.545	1.305	1.452	0.507	0.85	0.659	0.636	0.707	0.581	2	1.794	1.809	0.477	0.576	0.568	0.18	0.359	0.346	0.7725	0.727425	0.802653	1.06289	1.47569
CSA006794.1	74	K	adenylate kinase 4	3	3	1	0.000299032	91.961	LDEMLEK(1)HGAK	3	0.54409	2	1	0.00171008	74.611	LDEMLEK(1)HGAK	3	-2.2066	1	1	0.000239219	95.477	LDEMLEK(1)HGAK	3	-0.11036	2	0.866	0.883	0.868	1.175	1.151	1.115	1.134	1.123	1.201	1.017	1.008	0.957	1.039	1.009	1.051	0.967	0.959	0.999	0.851524	0.875992	0.907001	1.1309	1.14073
CSA006867.1	44	K	GRIP and coiled-coil domain-containing protein 2	3	3	1	2.16166e-162	290.94	FQIQGDDLNGVSEDPSSK(1)R	2	-0.26835	2	1	7.88493e-30	153.23	FQIQGDDLNGVSEDPSSK(1)R	3	-2.5846	2	1	2.80855e-132	301.59	FQIQGDDLNGVSEDPSSK(1)R	3	0.074152	6	1.08	1.011	0.943	1.32	1.212	1.166	0.543	0.82	0.98	1.228		1.162	0.904		0.945	0.788		0.775	0.879479		0.811532	1.46018
CSA006867.1	168	K	GRIP and coiled-coil domain-containing protein 2	3	3	1	5.90113e-15	161.79	NNVPVK(1)VPR	3	0.87532	3	1	0.00120038	120.31	NNVPVK(1)VPR	2	-1.0883	1	1	7.614e-07	156.35	NNVPVK(1)VPR	3	0.79892	5	1.178	1.233	1.009	1.277	1.342	1.254	0.407	0.264	0.733	1.228		1.162	0.904		0.945	0.788		0.775	0.959283		0.86833	1.41261
CSA006867.1	232	K	GRIP and coiled-coil domain-containing protein 2	3	3	1	0.00563048	108.47	LELK(1)MSK(1)K	2	-0.055851	2	1	0.0137959	82.645	LELK(1)MSK(1)K	2	0.093811	2	1	0.014447	93.649	LELK(1)MSK(1)K	2	1.3178	2	0.835	0.893	1.047	1.277	1.149	1.171	1.071	1.107	0.76	1.228		1.162	0.904		0.945	0.788		0.775	0.679967		0.901033	1.41261
CSA006867.1	235	K	GRIP and coiled-coil domain-containing protein 2	3	2	1	0.00563048	108.47	LELK(1)MSK(1)K	2	-0.055851	2	1	0.0137959	82.417	LELK(1)MSK(1)K	2	0.093811	1	1	0.0146254	90.05	LELK(1)MSK(1)K	2	1.3178	1	0.835	0.773		1.277	1.315		1.071	1.133		1.228		1.162	0.904		0.945	0.788		0.775	0.679967			1.41261
CSA006867.1	564	K	GRIP and coiled-coil domain-containing protein 2	3	3	1	7.69255e-20	167.03	VSGVDPIEQITK(1)R	2	-0.14809	3	1	9.54701e-13	155.43	VSGVDPIEQITK(1)R	2	-0.31788	3	1	1.1517e-06	127.56	VSGVDPIEQITK(1)R	3	0.0046696	3	1.253	1.27	1.211	1.002	0.965	0.988	0.598	0.634	0.657	1.228		1.162	0.904		0.945	0.788		0.775	1.02036		1.04217	1.10841
CSA006880.1	34	K	uncharacterized protein At2g27730, mitochondrial	3	3	1	0.00147513	102.52	AAENIYIK(1)K	2	0.05175	2	1	3.60553e-05	133.81	AAENIYIK(1)K	3	1.3687	3	1	0.000524296	121.9	AAENIYIK(1)K	3	0.37224	4	1.063	1.058	1.022	1.104	1.118	1.092	0.84	0.843	0.913	0.959	0.876	0.891	1.073	1.07	1.157	0.934	1.111	0.993	1.10845	1.20776	1.14703	1.02889	1.04486
CSA006881.1	172	K	lysine--tRNA ligase, cytoplasmic isoform X2	3	3	1	0.00370981	89.369	FHSGVK(1)R	3	0.47966	3	1	0.00303578	90.661	FHSGVK(1)R	3	-0.22593	2	1	0.00230772	97.602	FHSGVK(1)R	3	0.05257	2	1.051	0.984	0.899	1.019	1.026	1.139	0.966	1.085	1.105		1.008			1.003			0.987			0.97619			1.02293
CSA006911.1	8	K	60S ribosomal protein L32-1-like	3	3	1	0.00128747	92.47	AVPLITK(1)K	3	0.42589	1	1	0.00439903	77.282	AVPLITK(1)K	3	-0.60163	1	1	0.00174596	89.142	AVPLITK(1)K	3	-0.51353	2	1.696	1.686	1.387	0.531	0.5	0.617	0.314	0.423	0.77	1.725	1.654	1.59	0.615	0.607	0.77	0.388	0.345	0.473	0.983188	1.01935	0.872327	0.863415	0.823723
CSA006911.1	62	K	60S ribosomal protein L32-1-like	3	3	1	3.32924e-10	117.08	GCVLMPNIGYGSDK(1)K	3	-0.45066	1	1	8.55457e-09	110.55	GCVLMPNIGYGSDK(1)K	3	-0.67359	1	1	2.67504e-10	103.14	GCVLMPNIGYGSDK(1)K	3	-0.25573	1	1.504	1.41	1.282	0.644	0.665	0.755	0.547	0.73	0.808	1.725	1.654	1.59	0.615	0.607	0.77	0.388	0.345	0.473	0.871884	0.852479	0.806289	1.04715	1.09555
CSA006911.1	74	K	60S ribosomal protein L32-1-like	3	3	1	0.00152524	111.95	K(1)FLVHNVK	2	0.36593	3	1	0.00261633	84.743	K(1)FLVHNVK	3	0.84488	1	1	0.00187574	87.696	K(1)FLVHNVK	2	-0.63919	3	1.355	1.554	1.414	0.716	0.637	0.67	0.75	0.503	0.646	1.725	1.654	1.59	0.615	0.607	0.77	0.388	0.345	0.473	0.785507	0.939541	0.889308	1.16423	1.04942
CSA006911.1	105	K	60S ribosomal protein L32-1-like	3	3	1	1.28335e-07	94.487	TYCAEIAHNVSTQK(1)R	3	-1.8673	2	1	1.26082e-10	125.5	TYCAEIAHNVSTQK(1)R	3	-2.0137	2	1	5.05727e-15	145.69	TYCAEIAHNVSTQK(1)R	3	-0.65475	1	1.198	1.388	1.532	0.889	0.737	0.652	0.841	0.688	0.424	1.725	1.654	1.59	0.615	0.607	0.77	0.388	0.345	0.473	0.694493	0.839178	0.963522	1.44553	1.21417
CSA007200.1	42	K	proline--tRNA ligase isoform X1	3	3	1	0.00225293	113.22	VK(1)IDDTDQR	2	1.0123	1	1	0.00133944	118.9	VK(1)IDDTDQR	2	0.69575	1	1	0.000309722	129.82	VK(1)IDDTDQR	2	1.1138	1	0.689	0.623	0.67	1.084	1.202	1.075	1.588	1.535	1.662	0.752	0.734	0.817	1.07	1.083	1.084	1.194	1.202	1.083	0.916223	0.848774	0.820073	1.01308	1.10988
CSA007243.1	202	K	glutathione S-transferase L3-like	3	3	1	0.00131248	100.58	VLVEFYTK(1)R	2	-0.26658	2	1	0.000748837	114.39	VLVEFYTK(1)R	3	-2.5944	2	1	0.000799031	101.38	VLVEFYTK(1)R	2	0.68282	2	0.579	0.669	0.534	0.749	0.686	0.854	2.209	2.053	2.226	0.557	0.55	0.569	0.347	0.38	0.363	2.327	2.294	2.292	1.0395	1.21636	0.938489	2.1585	1.80526
CSA007370.1	60	K	probable fructokinase-4 isoform X2	3	3	1	0.000682946	119.74	LGGK(1)SSFVGK	2	-0.12977	3	1	9.29813e-05	130.56	LGGK(1)SSFVGK	2	0.073397	3	1	0.000803488	109.72	LGGK(1)SSFVGK	2	0.365	3	1.412	1.439	1.484	0.769	0.755	0.716	0.573	0.574	0.442	1.582	1.673	1.626	0.783	0.75	0.766	0.387	0.35	0.393	0.892541	0.860132	0.912669	0.98212	1.00667
CSA007370.1	246	K	probable fructokinase-4 isoform X2	3	3	1	0.00430252	116.25	YYTK(1)NFR	2	-0.18088	1	1	0.00480524	113.41	YYTK(1)NFR	2	0.016873	2	1	0.00512555	110.12	YYTK(1)NFR	2	-0.9081	2	1.611	1.442	1.466	0.593	0.766	0.682	0.403	0.556	0.521	1.582	1.673	1.626	0.783	0.75	0.766	0.387	0.35	0.393	1.01833	0.861925	0.901599	0.757344	1.02133
CSA007370.1	289	K	probable fructokinase-4 isoform X2	3	3	1	2.33279e-10	157.68	SVLEDEEK(1)LK	2	0.15097	2	1	1.9255e-08	148.28	SVLEDEEK(1)LK	2	1.209	1	1	1.3803e-06	157.68	SVLEDEEK(1)LK	2	-0.43567	2	1.671	1.678	1.5	0.665	0.679	0.725	0.199	0.229	0.397	1.582	1.673	1.626	0.783	0.75	0.766	0.387	0.35	0.393	1.05626	1.00299	0.922509	0.849298	0.905333
CSA007394.1	399	K	beta-D-glucosyl crocetin beta-1,6-glucosyltransferase-like	3	3	0.999994	3.19529e-05	109.07	KVVVEK(1)SGEDIR	3	0.41455	1	1	0.00204747	94.688	VVVEK(1)SGEDIR	2	0.2142	1	1	1.96753e-05	111.83	KVVVEK(1)SGEDIR	3	1.3625	1	1.14	1.106	1.145	0.977	0.931	0.956	0.847	0.974	0.833
CSA007422.1	232	K	D-glycerate 3-kinase, chloroplastic-like	3	3	1	0.00340531	100.69	YDK(1)SANSGR	2	1.1156	1	1	0.00372918	103.63	YDK(1)SANSGR	2	1.2287	1	1	0.00107393	113.69	YDK(1)SANSGR	2	-0.067816	1	0.208	0.219	0.216	0.491	0.525	0.44	3.243	3.057	3.408	0.521	0.541	0.497	0.911	0.953	0.922	1.704	1.679	1.783	0.399232	0.404806	0.434608	0.538968	0.550892
CSA007496.1	5	K	heterogeneous nuclear ribonucleoprotein 1-like	3	3	1	1.01019e-07	97.095	K(1)SDNPHFGDGASPGK	3	-0.63203	1	1	0.000799921	64.565	K(1)SDNPHFGDGASPGK	4	-1.4688	1	1	2.08718e-05	75.548	K(1)SDNPHFGDGASPGK	3	-0.23243	1	0.991	0.955	0.977	1.154	1.085	1.074	0.918	1.069	1.029	1.153	1.17	1.203	0.932	0.941	0.953	0.803	0.752	0.767	0.859497	0.816239	0.812136	1.2382	1.15303
CSA007518.1	142	K	30S ribosomal protein S10, chloroplastic	3	3	1	0.000424637	108.72	TMGPVPLPTK(1)K	2	0.020375	2	1	0.00195644	89.663	TMGPVPLPTK(1)K	2	1.4245	1	1	0.000333294	113.24	TMGPVPLPTK(1)K	2	-0.010596	2	0.762	0.66	0.776	1.347	1.514	1.376	1.127	1.106	1.057		0.782	0.75		1.226	1.242		1.058	1.085		0.84399	1.03467		1.23491
CSA007520.1	3285	K	E3 ubiquitin-protein ligase UPL1 isoform X1	3	2	1	0.0106653	81.263	LIDFDNK(1)R	2	-0.39334	1	1	0.00224498	102.07	LIDFDNK(1)R	2	0.36577	1	1	0.011248	80.755	LIDFDNK(1)R	2	-0.9356	1	1.075	0.866		1.106	1.442		0.813	0.814			0.786	0.719		1.102	1.08		1.186	1.303		1.10178			1.30853
CSA007544.1	662	K	cell division cycle protein 48 homolog	3	2	1	0.0158826	78.683	YQIFK(1)SCLR	2	-0.58645	1	1	0.00353824	106.4	YQIFK(1)SCLR	2	-1.3075	1	1	0.00740553	79.07	YQIFK(1)SCLR	2	-0.24642	1		0.987	0.924		1.211	1.161		0.864	1.025	0.968	0.966	0.928	1.126	1.166	1.198	0.854	0.858	0.898		1.02174	0.99569		1.03859
CSA007591.1	151	K	protein DJ-1 homolog D-like isoform X1	3	3	1	7.82864e-18	169.89	ALGGTITGSDK(1)R	2	-0.015311	1	1	4.84631e-17	165.58	ALGGTITGSDK(1)R	2	-0.065421	1	1	2.53195e-07	151.55	ALGGTITGSDK(1)R	2	0.70137	1	0.814	0.949	0.874	1.302	1.134	1.193	1.082	1.022	1.088	0.732	0.772	0.723	1.111	1.111	1.131	1.213	1.184	1.243	1.11202	1.22927	1.20885	1.17192	1.0207
CSA007672.1	73	K	mitochondrial import inner membrane translocase subunit Tim9	3	3	1	0.00147937	105.04	FLK(1)HSMR	3	-0.70162	2	1	0.0133207	72.492	FLK(1)HSMR	3	-2.8401	3	1	0.000998745	114.65	FLK(1)HSMR	3	2.0051	3	0.9	0.892	0.904	1.196	1.007	1.117	1.044	1.274	1.122	1.008	1.015	0.967	1.05	1.084	1.051	0.966	0.923	0.953	0.892857	0.878818	0.93485	1.13905	0.928967
CSA007724.1	43	K	titin-like isoform X1	3	1	1	0.00150504	71.085	EETGAGMMDCK(1)K	3	1.0179	1	1	0.000426181	80.69	EETGAGMMDCK(1)K	3	1.2114	1	1	9.90689e-05	96.604	EETGAGMMDCK(1)K	3	-0.0011818	1			0.736			1.309			1.225	0.386	0.553	0.487	1.2	1.149	1.154	1.649	1.406	1.534			1.51129
CSA007724.1	396	K	titin-like isoform X1	3	3	1	8.82353e-05	126.5	EDLLSK(1)PENIR	2	0.018387	1	1	0.00165594	103.14	EDLLSK(1)PENIR	2	1.2968	1	1	0.000540541	118.76	EDLLSK(1)PENIR	2	0.028227	1	0.461	0.435	0.405	1.27	1.346	1.3	1.802	1.709	1.918	0.386	0.553	0.487	1.2	1.149	1.154	1.649	1.406	1.534	1.1943	0.786618	0.831622	1.05833	1.17145
CSA007747.1	273	K	T-complex protein 1 subunit eta	3	3	1	0.00325451	96.948	LNMIGIK(1)K	2	-1.1237	1	1	0.00123303	109.71	LNMIGIK(1)K	2	-1.8811	1	1	0.000529038	122.52	LNMIGIK(1)K	2	-1.4658	2	1.433	1.279	1.182	0.824	0.908	0.992	0.467	0.687	0.714	1.366	1.388	1.377	0.829	0.827	0.852	0.643	0.661	0.626	1.04905	0.92147	0.858388	0.993969	1.09794
CSA007758.1	413	K	acetolactate synthase 1, chloroplastic	3	3	1	0.00114059	105.25	GLNEILEAK(1)R	3	2.0346	2	1	0.000196365	125.46	GLNEILEAK(1)R	3	3.0064	2	1	0.000409358	130.44	GLNEILEAK(1)R	2	-0.89516	1	1.086	1.22	1.264	0.93	0.936	0.9	1.008	0.761	0.661	1.204	1.265	1.19	0.95	0.954	1.02	0.725	0.692	0.738	0.901993	0.964427	1.06218	0.978947	0.981132
CSA007767.1	94	K	splicing factor 3B subunit 1	3	3	1	7.12335e-19	174.05	GVDEDESMGFK(1)K	3	-0.71113	3	1	8.30784e-17	160.22	GVDEDESMGFK(1)K	3	-0.36287	2	1	5.36254e-14	173.19	GVDEDESMGFK(1)K	3	0.43681	3	1.265	1.194	1.302	0.928	1.016	0.852	0.663	0.715	0.643	1.099	1.085	1.118	1.106	1.131	1.125	0.645	0.653	0.693	1.15105	1.10046	1.16458	0.83906	0.89832
CSA007767.1	527	K	splicing factor 3B subunit 1	3	2	1	0.00290994	77.192	HLLVK(1)VIDR	3	0.52589	1	1	0.00362986	72.275	HLLVK(1)VIDR	3	0.74209	1	1	0.0117474	58.699	HLLVK(1)VIDR	3	-0.1	1		0.995	0.891		0.96	1.144		1.142	1.116	1.099	1.085	1.118	1.106	1.131	1.125	0.645	0.653	0.693		0.917051	0.796959		0.848806
CSA007781.1	73	K	beta-glucosidase BoGH3B-like	3	3	1	0.00323219	108.7	SIASTK(1)VMK	2	-0.2111	1	1	0.000601706	126.71	SIASTK(1)VMK	2	-1.0599	1	1	0.000845186	120.06	SIASTK(1)VMK	2	-2.2183	1	0.894	0.93	0.883	1.353	1.485	1.513	0.863	0.649	0.659	0.843	0.809	0.8	1.302	1.39	1.467	1.021	0.887	0.839	1.0605	1.14957	1.10375	1.03917	1.06835
CSA007790.1	209	K	probable ubiquitin-like-specific protease 2B isoform X1	3	3	1	4.68753e-45	189.81	TGNDSVLESDEQQAGK(1)R	3	-0.54659	1	1	6.63148e-24	158.45	TGNDSVLESDEQQAGK(1)R	3	0.14523	1	1	1.40342e-20	138.66	TGNDSVLESDEQQAGK(1)R	3	-0.62652	1	0.983	1.018	1.138	0.939	0.944	0.873	1.198	1.119	0.954
CSA007811.1	58	K	mitochondrial outer membrane protein porin of 34 kDa	3	3	1	1.87244e-11	156.14	TIFSFK(1)IPDQR	2	-0.80744	4	1	2.8234e-09	146.5	TIFSFK(1)IPDQR	2	-0.90451	4	1	3.09943e-05	144.57	TIFSFK(1)IPDQR	2	-1.3463	4	0.584	0.638	0.585	0.77	0.769	0.751	2.174	2.012	2.249	1.01	1.018	1.018	1.031	1.025	1.045	0.985	0.984	0.969	0.578218	0.626719	0.574656	0.746848	0.750244
CSA007815.1	82	K	hypersensitive-induced response protein 2	3	3	1	2.59776e-05	125.97	AMSDK(1)ASDAFYK	2	-1.5986	3	1	1.69449e-08	136.6	AMSDK(1)ASDAFYK	3	0.32551	2	1	5.55821e-07	146.96	AMSDK(1)ASDAFYK	2	-1.8339	4	0.98	0.996	0.926	1.215	1.26	1.234	0.864	0.791	0.929	0.864	0.816	0.821	1.12	1.093	1.095	1.064	1.147	1.108	1.13426	1.22059	1.12789	1.08482	1.15279
CSA007815.1	254	K	hypersensitive-induced response protein 2	3	3	1	2.20901e-34	145.52	EIGASSK(1)SSAVFIPHGPGAVR	3	0.47271	1	1	7.7289e-33	142.97	EIGASSK(1)SSAVFIPHGPGAVR	3	0.40537	1	1	9.65287e-31	151.63	EIGASSK(1)SSAVFIPHGPGAVR	3	0.50917	1	0.738	0.73	0.826	1.013	1.127	1.015	1.581	1.428	1.415	0.864	0.816	0.821	1.12	1.093	1.095	1.064	1.147	1.108	0.854167	0.894608	1.00609	0.904464	1.03111
CSA007827.1	156	K	beta-galactosidase 10	3	3	1	4.04362e-05	109.44	TDNEPFK(1)HYMQK	3	-1.5325	2	1	7.71753e-06	115.75	TDNEPFK(1)HYMQK	3	-1.3942	2	1	0.00303239	60.345	TDNEPFK(1)HYMQK	3	-1.1014	1	1.148	1.242	1.17	1.052	1.071	0.969	0.738	0.564	0.767	1.035	1.233	1.062	1.172	1.132	1.165	0.616	0.545	0.679	1.10918	1.0073	1.10169	0.897611	0.946113
CSA007878.1	439	K	coatomer subunit alpha-1	3	3	1	0.000779546	111.79	SNNQILIK(1)NLK	2	0.55256	2	1	0.000353642	102.4	SNNQILIK(1)NLK	2	0.90694	2	1	0.00108217	81.92	SNNQILIK(1)NLK	3	0.75413	1	1.143	1.288	1.019	1.051	0.984	1.223	0.751	0.583	0.752	1.196	1.168	1.236	0.991	0.994	0.991	0.626	0.705	0.695	0.955686	1.10274	0.824434	1.06054	0.98994
CSA007941.1	235	K	biotin carboxylase 1, chloroplastic	3	3	1	2.16837e-09	95.662	INAEDAFK(1)NFRPGPGR	3	1.427	1	1	0.0331662	47.942	INAEDAFK(1)NFRPGPGR	3	0.70294	1	1	3.01912e-09	99.711	INAEDAFK(1)NFRPGPGR	3	0.76482	1	1.045	0.921	0.959	1.376	1.156	1.353	0.546	1.047	0.708	0.949	0.931	0.973	1.197	1.188	1.165	0.822	0.849	0.841	1.10116	0.989259	0.985612	1.14954	0.973064
CSA007965.1	84	K	thioredoxin X, chloroplastic-like	3	3	1	0.00482082	76.228	REGAITK(1)AK	3	-0.77599	2	1	0.00450082	76.228	REGAITK(1)AK	3	0.44077	1	1	0.00786346	90.15	REGAITK(1)AK	3	0.7042	2	0.693	0.535	0.664	1.024	1.13	1.015	1.652	1.779	1.75	0.462	0.403	0.372	0.938	0.953	0.875	1.782	1.823	1.976	1.5	1.32754	1.78495	1.09168	1.18573
CSA008160.1	86	K	uncharacterized protein OsI_027940 isoform X2	3	2	1	0.0273672	89.355	AEMK(1)WWK	2	-0.96479	1	1	0.0198998	80.165	AEMK(1)WWK	2	-0.67892	2	1	0.0182331	89.355	AEMK(1)WWK	2	-1.021	1	1.471		1.334	0.834		0.876	0.38		0.548	1.005	1.093	1.078	1.081	1.139	1.157	0.905	0.698	0.723	1.46368		1.23748	0.771508
CSA008160.1	97	K	uncharacterized protein OsI_027940 isoform X2	3	3	1	0.0013542	83.862	GDDK(1)VPHYVK	3	-1.7154	1	1	0.0141558	54.784	GDDK(1)VPHYVK	3	-2.8829	1	1	0.0353478	42.336	GDDK(1)VPHYVK	3	-2.5191	1	1.238	1.015	1.073	0.998	1.109	1.095	0.632	0.932	0.804	1.005	1.093	1.078	1.081	1.139	1.157	0.905	0.698	0.723	1.23184	0.928637	0.995362	0.923219	0.973661
CSA008213.1	141	K	translin-associated protein X	3	3	1	0.00102244	97.635	DITINSK(1)K	3	-1.2808	1	1	0.000783922	117.7	DITINSK(1)K	2	-0.53471	2	1	0.00222054	94.692	DITINSK(1)K	2	-1.0121	2	0.817	0.688	0.899	1.13	1.188	0.945	1.286	1.435	1.357	1.022		1.063	1.046		1.045	0.919		0.865	0.799413		0.84572	1.08031
CSA008273.1	230	K	glutamate--cysteine ligase, chloroplastic	3	3	1	0.00567439	89.886	DIPIMPK(1)GR	2	-1.1866	2	1	0.00437534	88.177	DIPIMPK(1)GR	2	-1.6562	2	1	0.0167487	74.92	DIPIMPK(1)GR	2	0.32488	2	0.772	0.834	0.741	0.927	0.935	0.887	1.619	1.462	1.756	0.891	0.88	0.889	1.087	1.09	1.068	1.089	1.075	1.044	0.866442	0.947727	0.833521	0.852806	0.857798
CSA008273.1	447	K	glutamate--cysteine ligase, chloroplastic	3	3	1	0.00328146	98.044	NK(1)VPICGLK	3	2.0209	2	1	0.00303	109.29	NK(1)VPICGLK	2	0.083706	1	1	0.00137933	99.815	NK(1)VPICGLK	3	2.0247	2	0.789	0.68	0.709	1.087	1.102	1.061	1.392	1.549	1.599	0.891	0.88	0.889	1.087	1.09	1.068	1.089	1.075	1.044	0.885522	0.772727	0.797525	1	1.01101
CSA008400.1	350	K	uncharacterized protein LOC100245074 isoform X1	3	3	1	0.00134918	92.866	K(1)SYELGPGK	3	-0.89212	2	1	0.000210136	129.89	K(1)SYELGPGK	3	1.833	2	1	0.000545095	121.36	K(1)SYELGPGK	3	0.48932	3	1.005	1.049	0.971	1.205	1.24	1.219	0.829	0.719	0.857	0.911	0.942	0.982	1.144	1.137	1.134	0.938	0.927	0.85	1.10318	1.11359	0.988798	1.05332	1.09059
CSA008400.1	365	K	uncharacterized protein LOC100245074 isoform X1	3	3	1	0.00246215	104.45	VIAGIVK(1)R	3	1.5676	3	1	0.00111481	111.82	VIAGIVK(1)R	2	1.1313	2	1	0.00110482	96.285	VIAGIVK(1)R	3	-0.6319	4	0.835	0.802	0.824	1.282	1.319	1.231	1.065	1.074	1.142	0.911	0.942	0.982	1.144	1.137	1.134	0.938	0.927	0.85	0.916575	0.85138	0.839104	1.12063	1.16007
CSA008432.1	129	K	uncharacterized protein LOC100252802	3	3	1	0.0154056	95.358	LEFFK(1)SK	2	1.021	1	1	0.0310545	83.948	LEFFK(1)SK	2	0.30712	1	1	0.00584329	107.57	LEFFK(1)SK	2	1.3711	1	1.143	1.215	1.151	1.099	1.118	1.165	0.693	0.56	0.555			0.973			1.006			1.03			1.18294
CSA008456.1	395	K	3-isopropylmalate dehydratase large subunit-like isoform X1	3	3	1	0.00544358	66.27	VFLASGGK(1)K	3	0.13361	1	1	0.00750415	64.374	VFLASGGK(1)K	3	-0.031341	2	1	0.00117139	82.645	VFLASGGK(1)K	3	-0.045184	2	1.033	0.924	1.022	1.079	0.942	1.001	0.929	1.291	1.03	1.067	1.099	1.057	1.028	1.026	1.014	0.876	0.852	0.843	0.968135	0.840764	0.966887	1.04961	0.918129
CSA008464.1	254	K	GDSL esterase/lipase APG	3	3	1	1.18797e-11	153.75	INTDAQGFNK(1)K	2	-0.35171	1	1	4.5288e-05	127.02	INTDAQGFNK(1)K	2	1.2807	1	1	4.6052e-06	147.96	INTDAQGFNK(1)K	2	0.30771	1	0.795	0.892	0.81	1.912	1.502	1.667	0.373	0.698	0.612	0.783	0.79	0.783	1.543	1.447	1.46	0.688	0.608	0.655	1.01533	1.12911	1.03448	1.23914	1.03801
CSA008470.1	50	K	leucine aminopeptidase 2, chloroplastic-like	3	3	1	0.000498595	119.68	FQNSILK(1)K	3	0.097537	3	1	0.000689692	119.68	FQNSILK(1)K	3	1.29	3	1	0.000777014	116.52	FQNSILK(1)K	3	0.95217	3	0.754	0.758	0.729	1.03	1.042	1.051	1.53	1.477	1.569	1.258	1.32	1.277	0.919	0.938	0.939	0.739	0.634	0.682	0.599364	0.574242	0.570869	1.12078	1.11087
CSA008504.1	202	K	40S ribosomal protein S5	3	3	1	0.000973883	109.72	GSSNSYAIK(1)K	2	0.69339	3	1	0.0016251	108.56	GSSNSYAIK(1)K	2	-0.25658	2	1	0.000499161	106.26	GSSNSYAIK(1)K	2	0.18646	3	1.314	1.329	1.293	0.892	0.957	0.895	0.612	0.538	0.606	1.235	1.198	1.225	0.965	0.967	0.981	0.721	0.727	0.714	1.06397	1.10935	1.05551	0.924352	0.989659
CSA008510.1	158	K	calnexin homolog 1-like	3	3	1	1.02462e-05	136.11	VHFILK(1)HK	2	-0.32717	5	1	0.000739489	107.9	VHFILK(1)HK	2	0.097055	5	1	0.000662832	122.13	VHFILK(1)HK	2	-0.10451	6	1.46	1.322	1.278	0.883	0.904	0.834	0.342	0.612	0.715	1.385	1.423	1.376	1.042	1.042	1.057	0.451	0.385	0.412	1.05415	0.929023	0.928779	0.847409	0.867562
CSA008579.1	76	K	zinc finger BED domain-containing protein RICESLEEPER 1-like	3	3	1	2.09272e-27	183.41	SNYDVSQILAAK(1)R	2	-0.46199	2	1	2.22671e-24	182.37	SNYDVSQILAAK(1)R	2	1.214	2	1	0.000142604	79.875	SNYDVSQILAAK(1)R	3	-0.33799	1	0.637	0.653	1.009	1.087	1.019	1.03	1.687	1.695	1.02
CSA008594.1	241	K	serine/threonine-protein kinase STY46-like	3	3	1	0.00410349	67.997	GGDLHQYLK(1)EK	3	-0.80731	1	1	0.0007509	82.85	GGDLHQYLK(1)EK	3	0.48515	1	1	0.0060207	63.091	GGDLHQYLK(1)EK	3	0.42786	1	0.93	0.935	0.924	1.126	1.172	1.185	1.071	1.003	0.997	1.18	1.16	1.123	1.019	0.998	1.002	0.726	0.864	0.809	0.788136	0.806034	0.822796	1.105	1.17435
CSA008684.1	232	K	aldose 1-epimerase	3	2	1	0.000586107	63.473	GTPFDFTAEK(1)K	3	1.2744	1	1	0.00194364	72.34	GTPFDFTAEK(1)K	3	2.452	1	1	1.12141e-06	157.03	GTPFDFTAEK(1)K	2	-0.46473	2		0.964	1.036		0.992	1.148		1.16	0.813	1	1.027	1.037	1.075	1.077	1.087	0.916	0.863	0.855		0.938656	0.999036		0.921077
CSA008731.1	582	K	uncharacterized protein LOC100853644 isoform X3	3	2	1	5.18993e-06	89.911	SSDCEQGDSANK(1)LPR	3	1.224	1	1	0.018656	47.345	SSDCEQGDSANK(1)LPR	3	0.84327	1	1	3.79169e-09	99.069	SSDCEQGDSANK(1)LPR	3	1.1647	1	1.116		1.017	0.943		0.865	0.933		1.214
CSA008732.1	46	K	40S ribosomal protein S18-like	3	3	1	4.18843e-07	136.3	VQNTNVDGK(1)QK	3	0.058324	2	1	8.09085e-15	170.95	VQNTNVDGK(1)QK	2	0.29659	2	1	7.17888e-06	146.79	VQNTNVDGK(1)QK	3	-0.35291	2	1.674	1.729	1.649	0.616	0.611	0.609	0.253	0.215	0.238	1.409	1.438	1.554	0.755	0.715	0.736	0.698	0.701	0.519	1.18808	1.20236	1.06113	0.815894	0.854545
CSA008732.1	69	K	40S ribosomal protein S18-like	3	3	1	0.00152524	111.95	FANIVCK(1)K	2	-0.18615	2	1	0.00110742	111.95	FANIVCK(1)K	2	0.64956	1	1	0.00213703	101.54	FANIVCK(1)K	2	-0.32116	2	1.232	1.593	1.446	0.725	0.628	0.658	0.974	0.443	0.595	1.409	1.438	1.554	0.755	0.715	0.736	0.698	0.701	0.519	0.874379	1.10779	0.930502	0.960265	0.878322
CSA008732.1	70	K	40S ribosomal protein S18-like	3	2	1	0.00176652	115.57	K(1)ADVDMNKR	2	-0.39958	2	1	3.13095e-10	117.25	K(1)ADVDMNKR	2	-1.2035	1	0.999921	0.0285028	46.819	K(1)ADVDMNKR	3	-0.29873	1	1.776		1.727	0.456		0.472	0.25		0.252	1.409	1.438	1.554	0.755	0.715	0.736	0.698	0.701	0.519	1.26047		1.11133	0.603974
CSA008732.1	77	K	40S ribosomal protein S18-like	3	3	1	0.00038002	118.28	KADVDMNK(1)R	2	2.2788	3	1	0.00427859	93.098	ADVDMNK(1)R	2	0.73319	1	1	0.0129854	78.516	ADVDMNK(1)R	2	0.05184	1	1.543	1.517	1.507	0.628	0.631	0.627	0.492	0.576	0.509	1.409	1.438	1.554	0.755	0.715	0.736	0.698	0.701	0.519	1.0951	1.05494	0.969755	0.831788	0.882517
CSA008732.1	160	K	40S ribosomal protein S18-like	3	3	1	0.00056006	110.88	GQHTK(1)TTGR	2	-0.15952	4	1	0.000148185	125.57	GQHTK(1)TTGR	2	-0.35981	3	1	0.00052733	95.642	GQHTK(1)TTGR	2	0.20127	5	1.908	1.894	1.817	0.434	0.469	0.446	0.023	0.08	0.1	1.409	1.438	1.554	0.755	0.715	0.736	0.698	0.701	0.519	1.35415	1.31711	1.16924	0.574834	0.655944
CSA008740.1	147	K	universal stress protein PHOS32	3	3	1	0.0139432	73.248	DHDMK(1)ER	3	0.7191	3	1	0.00416633	107.57	DHDMK(1)ER	2	-0.81441	3	1	0.0331511	47.082	DHDMK(1)ER	3	1.2515	1	1.38	1.323	1.307	0.854	0.887	0.862	0.532	0.631	0.621	1.002	1.065	1.054	0.988	1	0.996	0.953	0.88	0.92	1.37725	1.24225	1.24004	0.864372	0.887
CSA008836.1	231	K	L-ascorbate oxidase homolog	3	3	1	0.0106858	77.058	IQGHK(1)MK	3	-0.66389	1	1	0.0172724	67.032	IQGHK(1)MK	3	0.098582	1	1	0.0179043	67.981	IQGHK(1)MK	3	-0.78599	2	0.925	0.981	0.923	1.503	1.522	1.308	0.619	0.514	0.841	0.893	0.907	0.902	1.22	1.257	1.243	0.864	0.863	0.859	1.03583	1.08159	1.02328	1.23197	1.21082
CSA008855.1	196	K	chlorophyll a-b binding protein CP24 10A, chloroplastic	3	3	1	0.00034965	116.25	LAEIK(1)HAR	3	-0.9861	3	1	0.000144231	126.62	LAEIK(1)HAR	3	0.78297	3	1	5.6636e-05	133.58	LAEIK(1)HAR	2	1.2793	2	0.74	0.572	0.616	0.923	0.971	0.888	1.684	1.897	2.009	0.377	0.642	0.575	0.695	0.794	0.797	2.177	1.681	1.797	1.96286	0.890966	1.0713	1.32806	1.22292
CSA008885.1	6	K	histone H2A.1-like	3	3	1	8.96544e-06	126.21	MDSTAK(1)TATAR	2	1.5254	4	1	0.000252909	94.402	MDSTAK(1)TATAR	2	-0.28607	4	1	8.7859e-05	110.31	MDSTAK(1)TATAR	2	1.2457	8	0.922	1.058	1.167	0.952	0.963	1.037	1.297	1.023	0.686	1.716	1.639	1.879	0.575	0.695	0.529	0.467	0.446	0.293	0.537296	0.645516	0.621075	1.65565	1.38561
CSA008885.1	27	K	histone H2A.1-like	3	2	1	0.0260382	95.358	SVTK(1)SIK	2	2.1428	1	1	0.0109715	95.358	SVTK(1)SIK	3	1.3934	2	1	0.00611824	106.6	SVTK(1)SIK	2	2.6689	2		1.712	1.704		0.642	0.603		0.211	0.132	1.716	1.639	1.879	0.575	0.695	0.529	0.467	0.446	0.293		1.04454	0.906865		0.923741
CSA008885.1	129	K	histone H2A.1-like	3	3	1	0.00129889	93.623	K(1)SAAADSEK	3	1.5104	2	1	0.000888719	119.39	K(1)SAAADSEK	3	1.1151	2	1	0.000338354	126.71	K(1)SAAADSEK	3	1.2999	2	1.538	1.591	1.524	0.774	0.755	0.766	0.325	0.298	0.294	1.716	1.639	1.879	0.575	0.695	0.529	0.467	0.446	0.293	0.89627	0.970714	0.81107	1.34609	1.08633
CSA008885.1	137	K	histone H2A.1-like	3	3	1	4.9541e-12	111.12	SAAADSEK(1)ASK(1)SPK	3	1.1104	7	1	1.00627e-06	107.65	SAAADSEK(1)ASK(1)SPK	3	1.8233	2	1	5.97581e-15	127.71	SAAADSEK(1)ASK(1)SPK	3	0.61429	7	1.083	1.155	1.111	1.168	1.11	1.128	0.726	0.677	0.684	1.716	1.639	1.879	0.575	0.695	0.529	0.467	0.446	0.293	0.631119	0.704698	0.591272	2.0313	1.59712
CSA008885.1	140	K	histone H2A.1-like	3	3	1	4.9541e-12	111.12	SAAADSEK(1)ASK(1)SPK	3	1.1104	5	1	1.00627e-06	100.11	SAAADSEK(1)ASK(1)SPK	3	1.8233	2	1	5.97581e-15	127.32	SAAADSEK(1)ASK(1)SPK	3	0.61429	6	1.022	1.081	1.004	1.29	1.282	1.27	0.693	0.61	0.724	1.716	1.639	1.879	0.575	0.695	0.529	0.467	0.446	0.293	0.595571	0.659549	0.534327	2.24348	1.8446
CSA008885.1	143	K	histone H2A.1-like	3	3	1	4.9541e-12	99.092	K(0.001)SAAADSEK(0.999)ASK(1)SPK(1)SPK	4	-0.93688	3	1	0.00413689	87.667	ASK(1)SPK(1)SPK	2	0.61965	1	1	5.97581e-15	110.93	KSAAADSEK(1)ASK(1)SPK(1)SPK	4	0.3328	3	0.922	1.082	0.937	1.447	1.434	1.298	0.694	0.432	0.824	1.716	1.639	1.879	0.575	0.695	0.529	0.467	0.446	0.293	0.537296	0.660159	0.49867	2.51652	2.06331
CSA008945.1	406	K	ruBisCO large subunit-binding protein subunit beta, chloroplastic	3	3	1	3.28464e-141	274.45	DATTIVGDGSTQEAVNK(1)R	2	-0.69459	5	1	1.21421e-112	265.93	DATTIVGDGSTQEAVNK(1)R	2	-0.60351	4	1	7.04633e-92	272.8	DATTIVGDGSTQEAVNK(1)R	2	-0.46204	3	0.824	0.774	0.806	1.125	1.145	1.196	1.277	1.328	1.226	0.764	0.755	0.767	1.172	1.153	1.165	1.124	1.167	1.123	1.07853	1.02517	1.05085	0.959898	0.993062
CSA008945.1	510	K	ruBisCO large subunit-binding protein subunit beta, chloroplastic	3	3	1	3.52392e-42	177.6	LASK(1)VDSIKESLDNDEEK	4	-0.46266	5	1	2.77219e-66	215.75	LASK(1)VDSIKESLDNDEEK	4	2.3337	5	1	2.11387e-06	149.96	LASK(1)VDSIK	2	-0.83141	4	0.773	0.626	0.806	1.288	1.144	1.286	1.177	1.597	1.11	0.764	0.755	0.767	1.172	1.153	1.165	1.124	1.167	1.123	1.01178	0.829139	1.05085	1.09898	0.992194
CSA008978.1	608	K	N-alpha-acetyltransferase 15, NatA auxiliary subunit-like	3	3	1	0.00177494	91.656	YVNSECVK(1)R	2	-1.3107	1	1	0.00526688	77.358	YVNSECVK(1)R	2	-1.0851	1	1	0.000783038	104.43	YVNSECVK(1)R	3	2.4848	3	1.244	1.202	1.001	1.051	1.101	0.969	0.554	0.603	1.114	1.14	1.173	1.118	1.162	1.1	1.124	0.639	0.638	0.777	1.09123	1.02472	0.895349	0.904475	1.00091
CSA009025.1	19	K	NADP-dependent malic enzyme	3	3	1	0.00215441	64.104	DPHHNK(1)GLAFTEK	4	-1.1694	1	1	0.000175824	82.663	DPHHNK(1)GLAFTEK	3	-0.88388	2	1	1.64537e-06	113.4	DPHHNK(1)GLAFTEK	3	-0.45614	2	0.449	0.623	0.553	1.32	1.071	1.059	1.764	1.688	1.922	0.556	0.561	0.581	1.151	1.168	1.199	1.389	1.38	1.361	0.807554	1.11052	0.951807	1.14683	0.916952
CSA009025.1	26	K	NADP-dependent malic enzyme	3	3	1	0.00674803	88.596	GLAFTEK(1)ER	2	-0.68529	1	1	0.00229944	113.44	GLAFTEK(1)ER	2	0.40651	1	1	0.00141795	99.568	GLAFTEK(1)ER	2	0.59108	1	0.971	0.811	0.964	1.055	1.158	1.057	1.079	1.247	1.076	0.556	0.561	0.581	1.151	1.168	1.199	1.389	1.38	1.361	1.7464	1.44563	1.65921	0.916594	0.991438
CSA009116.1	3254	K	transcription-associated protein 1 isoform X1	3	3	1	0.000184182	129.74	DVANK(1)SELGR	2	0.53895	1	1	0.00379005	91.043	DVANK(1)SELGR	2	0.25903	1	1	0.000402156	135.1	DVANK(1)SELGR	2	-0.66711	1	1.137	1.325	1.099	0.905	0.751	0.879	0.939	0.786	1.025	1.223	1.263	1.146	0.906	0.904	0.932	0.791	0.745	0.881	0.929681	1.04909	0.958988	0.998896	0.830752
CSA009154.1	758	K	probable alpha-mannosidase At5g13980	3	3	1	0.00100505	108.72	IDPLGEGAK(1)WR	2	0.19368	1	1	0.00398169	80.318	IDPLGEGAK(1)WR	2	-0.51538	1	1	0.000543714	115.57	IDPLGEGAK(1)WR	2	0.99914	1	0.779	0.907	0.801	1.342	1.304	1.232	1.1	0.901	1.188	0.757	0.735	0.722	1.213	1.211	1.274	1.105	1.092	1.103	1.02906	1.23401	1.10942	1.10635	1.0768
CSA009157.1	177	K	phosphomethylethanolamine N-methyltransferase	3	3	1	0.000812351	103.82	K(1)NNPTHYR	3	0.93739	1	1	0.0229608	53.753	K(1)NNPTHYREPR	4	0.53815	2	1	0.0130931	60.91	K(1)NNPTHYR	3	0.52397	1	1.266	0.822	0.875	0.648	0.793	0.759	1.001	1.65	1.643	1.842	1.7	1.76	0.552	0.592	0.583	0.343	0.493	0.399	0.687296	0.483529	0.497159	1.17391	1.33953
CSA009175.1	40	K	uncharacterized protein LOC109232145	3	3	1	1.40758e-06	131.06	SHSLQETK(1)TDGR	3	2.0485	1	1	0.000303278	85.554	SHSLQETK(1)TDGR	3	2.0838	1	1	1.88528e-05	102.87	SHSLQETK(1)TDGR	3	0.87309	1	1.123	1.074	0.919	1.042	1.026	1.064	0.8	0.92	1.16	1.079	1.057	1.157	0.985	0.986	0.994	0.907	0.937	0.756	1.04078	1.01608	0.794296	1.05787	1.04057
CSA009186.1	67	K	S-adenosylmethionine synthase 2	3	2	1	3.21785e-10	108.98	ANVNYEK(1)IVR	2	0.71965	1	1	0.000156005	128.88	ANVNYEK(1)IVR	2	1.0517	2	1	0.000880919	122.33	ANVNYEK(1)IVR	2	-1.1259	1		1.32	1.369		0.735	0.684		0.814	0.72	1.64	1.642	1.659	0.575	0.56	0.563	0.572	0.588	0.56		0.803898	0.825196		1.3125
CSA009205.1	518	K	succinate dehydrogenase	3	3	1	5.4246e-05	98.902	VAEIHRPGEK(1)QK	4	0.67587	3	1	5.04678e-05	96.745	VAEIHRPGEK(1)QK	3	0.55228	2	1	6.87313e-05	99.5	VAEIHRPGEK(1)QK	3	0.28117	2	1.018	0.996	1.002	1.028	1.104	1.077	1.02	0.974	0.974	0.976	0.955	0.95	1.033	0.991	1.031	0.987	1.08	1.011	1.04303	1.04293	1.05474	0.99516	1.11403
CSA009227.1	532	K	heat shock cognate 70 kDa protein 2-like	3	3	1	0.000635825	89.805	YK(1)AEDEDHK	3	-0.083096	3	1	0.000656398	96.229	YK(1)AEDEDHKK	4	1.396	2	1	0.0183441	54.286	YK(1)AEDEDHK	3	-1.4217	3	1.033	0.943	0.953	0.983	1.066	0.915	1.048	1.114	1.281	0.935	0.966	0.959	0.956	0.937	0.9	1.107	1.103	1.226	1.10481	0.97619	0.993743	1.02824	1.13767
CSA009227.1	539	K	heat shock cognate 70 kDa protein 2-like	3	3	1	0.000282771	92.19	YKAEDEDHK(1)K	3	-0.58232	2	1	0.0015615	96.745	YKAEDEDHK(1)K	3	-1.6417	2	1	0.00180203	85.813	YKAEDEDHK(1)K	3	-0.15091	6	1.091	1.025	1.029	0.872	0.925	0.887	1.069	1.13	1.161	0.935	0.966	0.959	0.956	0.937	0.9	1.107	1.103	1.226	1.16684	1.06108	1.07299	0.912134	0.987193
CSA009375.1	32	K	cysteine proteinase inhibitor-like	3	3	1	0.000438529	96.948	FAVDEHNK(1)K	3	0.65715	1	1	0.000867653	85.67	FAVDEHNK(1)K	3	-0.32144	1	1	0.000312759	109.66	FAVDEHNK(1)K	2	1.0792	2	0.833	0.895	0.902	1.253	1.224	1.066	1.105	1.016	1.194	0.676	0.672	0.68	1.069	1.061	1.07	1.307	1.329	1.316	1.23225	1.33185	1.32647	1.17212	1.15363
CSA009387.1	80	K	NADH dehydrogenase	3	3	1	0.000312394	123.98	FFYDGLK(1)R	2	-0.90174	1	1	1.87276e-06	154.12	FFYDGLK(1)R	2	-1.2202	1	1	0.000186249	131.06	FFYDGLK(1)R	2	-1.3677	1	1.141	1.151	1.087	1.118	1.132	1.063	0.672	0.66	0.815	1.038	1.029	1.054	1.022	0.982	1.005	0.92	0.98	0.861	1.09923	1.11856	1.03131	1.09393	1.15275
CSA009388.1	19	K	NADH dehydrogenase	3	3	1	0.00189862	114.86	IK(1)TDTPIAK	2	0.26355	1	1	0.000649738	126.19	IK(1)TDTPIAK	2	0.43995	1	1	0.00239124	93.345	IK(1)TDTPIAK	2	0.39832	1	1.172	1.178	1.134	1.044	1.064	1.007	0.704	0.688	0.79	0.996	1.021	1.073	1.025	1.021	0.991	0.944	0.981	0.876	1.17671	1.15377	1.05685	1.01854	1.04212
CSA009402.1	390	K	probable 26S proteasome non-ATPase regulatory subunit 3	3	3	1	0.00105193	112.13	ISLADVAK(1)K	3	1.7786	2	1	0.00260639	100.88	ISLADVAK(1)K	2	-2.9934	1	1	0.000771426	108.47	ISLADVAK(1)K	3	-0.17291	2	0.905	0.955	0.921	1.119	1.052	1.192	1.126	1.107	0.992	1.021	1.069	1.055	1.131	1.168	1.11	0.847	0.756	0.749	0.886386	0.893358	0.872986	0.98939	0.900685
CSA009423.1	12	K	40S ribosomal protein S9-2	3	3	1	0.0141528	97.431	NYGK(1)TFK	3	-0.8735	3	1	0.00970278	97.635	NYGK(1)TFK	2	-0.96654	3	1	0.00523995	109.71	NYGK(1)TFK	2	-0.31721	3	1.564	1.638	1.579	0.619	0.6	0.608	0.461	0.394	0.383
CSA009423.1	23	K	40S ribosomal protein S9-2	3	3	1	0.00725258	78.516	RPYEK(1)ER	3	-1.1009	2	1	0.0261404	74.464	RPYEK(1)ER	3	1.2109	1	1	0.00952709	90.64	RPYEK(1)ER	3	0.79915	2	1.922	1.847	1.567	0.288	0.306	0.472	0.171	0.355	0.583
CSA009444.1	15	K	abscisic stress-ripening protein 2	3	3	1	0.000105772	100.93	KHHHLFHHEK(1)K	5	-0.082741	2	1	0.000884556	83.499	HHHLFHHEK(1)K	3	1.9424	1	1	0.00194387	73.887	HHHLFHHEK(1)K	3	1.8558	1	0.606	0.613	0.564	1.483	1.467	1.465	1.263	1.245	1.381	0.829	0.859	0.85	1.33	1.284	1.349	0.849	0.898	0.796	0.731001	0.71362	0.663529	1.11504	1.14252
CSA009444.1	61	K	abscisic stress-ripening protein 2	3	3	0.999976	0.00848298	61.344	KDPENAHK(1)HK	4	-0.098789	1	1	0.00221406	83.182	KDPENAHK(1)HK	3	0.36794	2	1	0.00197897	74.962	DPENAHK(1)HK	4	0.84392	5	0.578	0.64	0.71	1.22	1.142	1.147	1.636	1.574	1.487	0.829	0.859	0.85	1.33	1.284	1.349	0.849	0.898	0.796	0.697226	0.745052	0.835294	0.917293	0.889408
CSA009444.1	100	K	abscisic stress-ripening protein 2	3	3	1	0.00315281	74.92	EGEEEHGK(1)K	3	0.86935	1	1	0.000688834	104.42	KEGEEEHGK(1)K	3	0.47398	3	1	0.00188363	85.522	KEGEEEHGK(1)K	3	-0.12983	1	0.512	0.519	0.517	1.175	1.222	1.227	1.819	1.702	1.781	0.829	0.859	0.85	1.33	1.284	1.349	0.849	0.898	0.796	0.617612	0.604191	0.608235	0.883459	0.951713
CSA009446.1	259	K	clathrin light chain 2-like	3	3	1	0.0122578	55.353	LK(1)HNTPPHLK	4	-0.18027	1	1	0.0050416	64.82	LK(1)HNTPPHLK	4	-0.1891	1	1	0.00914637	57.532	LK(1)HNTPPHLK	4	-0.78832	1	1.159	1.082	1.236	1.036	1.083	0.941	0.737	0.84	0.665	1.222	1.227	1.151	0.935	0.937	0.961	0.741	0.686	0.74	0.948445	0.881826	1.07385	1.10802	1.15582
CSA009462.1	225	K	nudix hydrolase 23, chloroplastic	3	3	1	0.00179869	80.787	FHYGTINK(1)R	3	0.50425	1	1	0.000857116	86.136	FHYGTINK(1)R	3	0.88234	1	1	0.000792867	86.136	FHYGTINK(1)R	3	0.67304	1	0.953	0.822	0.692	0.942	1.17	1.115	1.25	1.211	1.563	0.602	0.673	0.636	1.049	1.078	1.058	1.499	1.362	1.441	1.58306	1.2214	1.08805	0.897998	1.08534
CSA009469.1	376	K	squalene synthase	3	3	1	0.00355634	103.91	SYVIK(1)SEPR	2	-0.56021	1	1	0.00524982	81.017	SYVIK(1)SEPR	2	0.018986	1	1	0.0014626	99.283	SYVIK(1)SEPR	2	-0.86492	1	0.879	0.827	0.844	0.918	0.928	0.979	1.423	1.484	1.423	1.03	1.048	1.034	1.009	1.015	0.998	0.964	0.921	0.937	0.853398	0.789122	0.816248	0.909812	0.914286
CSA009564.1	68	K	zinc finger BED domain-containing protein DAYSLEEPER-like	3	3	1	0.00132435	94.909	VAGTSHLK(1)R	2	-0.098748	2	1	4.30822e-05	130.66	VAGTSHLK(1)R	2	-0.17326	2	1	5.55342e-05	130.66	VAGTSHLK(1)R	2	-0.014295	2	1.19	1.261	1.158	1.015	1.002	0.931	0.703	0.611	0.839	1.107	1.019	0.936	0.96	0.965	1.002	0.952	1.08	1.081	1.07498	1.23749	1.23718	1.05729	1.03834
CSA009577.1	46	K	uncharacterized protein At1g32220, chloroplastic	3	3	1	0.0042085	104.37	GYYEGK(1)R	2	4.0872	1	1	0.037534	75.189	GYYEGK(1)R	2	2.2747	1	1	0.0109075	92.47	GYYEGK(1)R	2	3.1493	1	0.652	0.766	0.785	1.183	1.251	1.204	1.539	1.219	1.259	0.778	0.803	0.755	1.075	1.107	1.071	1.208	1.241	1.323	0.838046	0.953923	1.03974	1.10047	1.13008
CSA009600.1	347	K	citrate synthase, glyoxysomal	3	3	1	0.00841133	94.114	VYK(1)NYDPR	2	1.1534	1	1	0.0165136	82.452	VYK(1)NYDPR	2	1.5566	1	1	0.0171179	79.713	VYK(1)NYDPR	2	0.62446	1	0.936	0.949	0.834	1.244	1.155	1.091	0.916	0.999	1.303	0.936	0.94	0.917	1.086	1.078	1.107	0.975	0.966	0.994	1	1.00957	0.909487	1.14549	1.07143
CSA009600.1	391	K	citrate synthase, glyoxysomal	3	3	1	2.09837e-11	148.28	AALSDEYFVK(1)R	2	-1.8544	1	1	0.00120121	101.35	AALSDEYFVK(1)R	2	-0.97713	1	1	0.000186498	137.01	AALSDEYFVK(1)R	2	0.65562	3	0.763	0.861	0.896	1.234	1.217	1.206	1.262	1.087	1.027	0.936	0.94	0.917	1.086	1.078	1.107	0.975	0.966	0.994	0.815171	0.915957	0.977099	1.13628	1.12894
CSA009660.1	768	K	sister chromatid cohesion 1 protein 4	3	3	0.999979	0.00462692	52.372	MKPTPPPAMTCMK(1)R	3	-1.8093	2	1	7.32069e-08	106.42	MKPTPPPAMTCMK(1)R	3	-0.79192	2	0.999998	0.0013464	63.29	MKPTPPPAMTCMK(1)R	3	-0.88359	3	1.026	1.019	1.028	1.077	1.027	1.007	0.945	1.02	1.01	0.846	0.987	1.017	0.924	0.977	0.946	1.296	0.979	1.035	1.21277	1.03242	1.01082	1.16558	1.05118
CSA009727.1	863	K	ATPase 10, plasma membrane-type-like	3	3	1	0.012088	88.921	TAFTSK(1)K	2	-1.192	1	1	0.00479172	101.72	TAFTSK(1)K	2	0.071377	1	1	0.00156275	123.98	TAFTSK(1)K	2	-0.17019	1	1.116	1.153	1.121	0.97	0.975	0.924	0.901	0.837	0.924	1.087	1.087	1.072	0.925	0.923	0.887	0.979	0.966	0.98	1.02668	1.06072	1.04571	1.04865	1.05634
CSA009750.1	319	K	coatomer subunit epsilon-1	3	3	1	7.62432e-05	113.69	LSHPDHMLVK(1)R	4	-1.0883	1	1	3.98979e-07	136.02	LSHPDHMLVK(1)R	4	0.99976	2	1	9.23534e-05	113.69	LSHPDHMLVK(1)R	3	0.89069	4	1.176	1.055	1.117	0.93	0.933	0.994	0.833	1.062	0.843	1.347	1.341	1.366	0.967	0.968	0.98	0.596	0.521	0.501	0.873051	0.786726	0.817716	0.961737	0.963843
CSA009759.1	121	K	ATP synthase subunit b', chloroplastic	3	3	1	0.0153188	95.502	DAAIK(1)EK	2	-0.72147	1	1	0.0111473	95.502	DAAIK(1)EK	2	0.63452	1	1	0.0128134	95.502	DAAIK(1)EK	2	-0.29449	1	0.49	0.492	0.479	0.876	0.842	0.843	2.229	2.192	2.349	0.346	0.351	0.35	0.808	0.82	0.791	2.054	2.12	2.117	1.41618	1.40171	1.36857	1.08416	1.02683
CSA009759.1	158	K	ATP synthase subunit b', chloroplastic	3	3	1	1.12351e-11	158.04	AEISAALNK(1)MK	3	0.18562	3	1	9.40229e-07	142.97	AEISAALNK(1)MK	3	0.22996	3	1	5.8486e-06	149.23	AEISAALNK(1)MK	3	-0.06659	3	0.503	0.618	0.488	0.878	0.947	0.914	2.198	1.841	2.24	0.346	0.351	0.35	0.808	0.82	0.791	2.054	2.12	2.117	1.45376	1.76068	1.39429	1.08663	1.15488
CSA009793.1	492	K	ATP-dependent zinc metalloprotease FTSH 4, mitochondrial	3	3	1	1.93358e-06	134.18	K(1)SAVISDESR	2	-1.6418	1	1	1.76989e-06	144.28	K(1)SAVISDESR	2	-1.1051	1	1	0.000180361	138.89	K(1)SAVISDESR	2	-0.025823	1	1.156	1.197	1.09	1.137	1.159	1.133	0.619	0.543	0.72	0.978	1.003	0.967	1.116	1.193	1.133	0.838	0.756	0.84	1.182	1.19342	1.1272	1.01882	0.9715
CSA009826.1	15	K	PHD finger protein ALFIN-LIKE 1	3	3	1	5.65963e-05	97.797	DKPSMDSGSK(1)SK	3	0.58014	1	1	6.8426e-05	104.95	DKPSMDSGSK(1)SK	3	1.3281	1	0.999993	0.00451156	68.044	DKPSMDSGSK(1)SK	3	1.6339	1	1.145	1.188	1.117	1.138	1.156	1.141	0.639	0.562	0.655
CSA009890.1	379	K	4-hydroxy-3-methylbut-2-en-1-yl diphosphate synthase	3	3	1	2.04473e-07	120.53	LQQGVAPFEEK(1)HR	3	-1.1167	1	1	5.66686e-05	90.156	LQQGVAPFEEK(1)HR	3	-0.28737	1	1	3.65617e-06	105.65	LQQGVAPFEEK(1)HR	3	0.11369	1	0.912	0.974	0.894	1.03	0.963	1.108	1.223	1.176	1.157	0.66	0.664	0.581	1.166	1.174	1.195	1.336	1.311	1.345	1.38182	1.46687	1.53873	0.883362	0.820273
CSA009913.1	293	K	probable mitochondrial-processing peptidase subunit beta, mitochondrial	3	3	1	0.000751747	88.056	HEDLVEQVK(1)K	3	-0.74154	1	1	0.000747621	89.171	HEDLVEQVK(1)K	3	-1.1416	3	1	0.00118882	81.017	HEDLVEQVK(1)K	3	-0.19957	2	1.108	1.065	1.044	0.802	0.944	0.917	1.122	1.032	1.091	1.171	1.161	1.158	0.856	0.928	0.882	0.849	0.879	0.884	0.9462	0.917313	0.901554	0.936916	1.01724
CSA009927.1	25	K	glycerol kinase-like	3	3	1	0.0220736	75.509	FILYDK(1)NAR	2	-1.135	1	1	0.00704211	77.662	FILYDK(1)NAR	2	-1.0026	1	1	0.00111654	103.26	FILYDK(1)NAR	2	-1.6506	1	0.768	0.784	0.726	1.203	1.233	1.304	1.291	1.206	1.251	0.7	0.73	0.733	1.185	1.208	1.246	1.221	1.2	1.189	1.09714	1.07397	0.99045	1.01519	1.0207
CSA009927.1	447	K	glycerol kinase-like	3	3	1	1.53808e-10	150.66	FTNK(1)SHIAR	3	0.52302	2	1	0.000252794	120.22	FTNK(1)SHIAR	3	0.94467	2	1	9.47339e-05	128.81	FTNK(1)SHIAR	3	1.3555	2	0.917	0.937	0.909	1.285	1.247	1.191	0.902	0.913	1.02	0.7	0.73	0.733	1.185	1.208	1.246	1.221	1.2	1.189	1.31	1.28356	1.24011	1.08439	1.03228
CSA009966.1	59	K	fructose-bisphosphate aldolase 1, chloroplastic	3	3	1	0.00255439	103.43	TAK(1)TVASPGR	2	0.65157	1	1	0.00357498	93.623	TAK(1)TVASPGR	2	0.11055	1	1	0.000880919	122.33	TAK(1)TVASPGR	2	0.43994	1	0.482	0.46	0.562	0.925	1.033	0.922	2.184	2.028	2.078	0.522	0.536	0.554	0.935	0.94	0.942	1.711	1.675	1.665	0.923372	0.858209	1.01444	0.989305	1.09894
CSA009966.1	80	K	fructose-bisphosphate aldolase 1, chloroplastic	3	3	1	3.9533e-51	211.7	GILAMDESNATCGK(1)R	2	-0.17797	10	1	1.11888e-59	225.31	GILAMDESNATCGK(1)R	3	-0.80165	12	1	1.39044e-46	225.29	GILAMDESNATCGK(1)R	2	-1.069	20	0.489	0.464	0.585	0.993	1.038	1.006	2.085	2.016	1.922	0.522	0.536	0.554	0.935	0.94	0.942	1.711	1.675	1.665	0.936782	0.865672	1.05596	1.06203	1.10426
CSA009966.1	348	K	fructose-bisphosphate aldolase 1, chloroplastic	3	3	1	1.99902e-62	211.16	ALQNTCLK(1)TWGGRPENVK	5	0.57559	4	1	8.84825e-29	167.99	ALQNTCLK(1)TWGGRPENVK	4	0.26465	2	1	2.77334e-21	145.88	ALQNTCLK(1)TWGGRPENVK	4	-0.060723	4	0.684	0.698	0.679	1.193	1.215	1.198	1.465	1.385	1.482	0.522	0.536	0.554	0.935	0.94	0.942	1.711	1.675	1.665	1.31034	1.30224	1.22563	1.27594	1.29255
CSA009966.1	389	K	fructose-bisphosphate aldolase 1, chloroplastic	3	3	1	1.79651e-08	143.25	YTGEGESEEAK(1)K	2	-0.24985	6	1	1.15929e-12	157.56	YTGEGESEEAK(1)K	2	1.0466	4	1	5.00054e-06	124.12	YTGEGESEEAK(1)K	2	1.1701	6	0.508	0.525	0.595	1.097	1.108	1.075	1.922	1.824	1.815	0.522	0.536	0.554	0.935	0.94	0.942	1.711	1.675	1.665	0.97318	0.979478	1.07401	1.17326	1.17872
CSA009990.1	57	K	prohibitin-1, mitochondrial-like	3	3	1	0.0202099	91.853	IVGVK(1)DK	2	-1.4544	1	1	0.00556975	103.74	IVGVK(1)DK	2	-2.1305	1	1	0.01603	91.853	IVGVK(1)DK	2	-1.9764	1	1.045	1.117	1.139	1.138	1.158	1.131	0.833	0.69	0.624	0.999	1.005	1.004	1.046	1.077	1.041	0.956	0.884	0.93	1.04605	1.11144	1.13446	1.08795	1.07521
CSA009990.1	222	K	prohibitin-1, mitochondrial-like	3	3	1	0.00721877	109.71	AK(1)FVVEK	2	-0.96755	1	1	0.00984123	97.431	AK(1)FVVEK	2	-0.21049	1	1	0.0111128	97.431	AK(1)FVVEK	2	-0.48634	1	0.87	0.856	0.799	1.122	1.197	1.197	1.192	1.119	1.239	0.999	1.005	1.004	1.046	1.077	1.041	0.956	0.884	0.93	0.870871	0.851741	0.795817	1.07266	1.11142
CSA010005.1	68	K	heat shock 70 kDa protein 14-like	3	3	1	0.0137037	62.582	NTISQIK(1)R	3	-0.66414	1	1	0.000729284	118.67	NTISQIK(1)R	3	-0.3162	2	1	0.00280235	83.168	NTISQIK(1)R	3	0.23572	2	0.739	1.005	1.083	0.93	0.997	0.963	1.679	1.08	0.954	1.124	1.098	1.131	0.925	0.947	0.936	0.908	0.893	0.888	0.657473	0.915301	0.95756	1.00541	1.0528
CSA010005.1	270	K	heat shock 70 kDa protein 14-like	3	3	1	0.00255452	93.374	AACEK(1)LK	3	0.49622	3	1	0.0055651	86.67	AACEK(1)LK	3	0.60679	3	1	0.0102719	93.374	AACEK(1)LK	3	0.52667	3	1.195	1.22	1.171	1.034	1.067	1.018	0.67	0.608	0.699	1.124	1.098	1.131	0.925	0.947	0.936	0.908	0.893	0.888	1.06317	1.11111	1.03537	1.11784	1.12672
CSA010080.1	720	K	lon protease homolog, mitochondrial-like	3	3	1	0.00375949	81.95	NLQK(1)HIEK	3	-0.25964	1	1	0.0259193	53.756	NLQK(1)HIEK	3	0.70937	1	1	0.0210611	56.434	NLQK(1)HIEK	3	1.3407	1	1.055	1.132	1.063	1.197	1.172	1.129	0.742	0.648	0.782	0.879	0.898	0.869	1.139	1.146	1.166	0.964	0.974	0.981	1.20023	1.26058	1.22325	1.05092	1.02269
CSA010083.1	126	K	eukaryotic initiation factor 4A-2	3	2	1	1.03989e-11	158.25	ELAQQIEK(1)VMR	2	-3.0576	1	1	2.29285e-09	148.96	ELAQQIEK(1)VMR	2	-0.25528	1	1	0.000554369	116.71	ELAQQIEK(1)VMR	2	-1.3636	1	1.145		1.149	1.038		1.054	0.764		0.699	1.074	0.972	0.962	0.97	1.021	0.944	0.984	1.009	1.037	1.06611		1.19439	1.0701
CSA010083.1	237	K	eukaryotic initiation factor 4A-2	3	3	0.999956	0.00485757	75.738	KFMNK(1)PVR	3	0.35786	2	0.999992	0.00759498	82.452	KFMNK(1)PVR	3	0.6014	2	0.999999	0.00508656	87.181	KFMNK(1)PVR	3	0.44022	2	1.205	1.236	1.249	1.051	1.028	1.018	0.629	0.625	0.54	1.074	0.972	0.962	0.97	1.021	0.944	0.984	1.009	1.037	1.12197	1.2716	1.29834	1.08351	1.00686
CSA010083.1	291	K	eukaryotic initiation factor 4A-2	3	3	1	0.000851474	117.02	K(1)VDWLTDK	3	0.81769	2	1	0.00591588	90.05	K(1)VDWLTDK	3	0.43996	3	1	0.000397515	125.7	K(1)VDWLTDK	2	-0.43237	1	1.367	1.273	1.319	0.935	0.976	0.946	0.458	0.618	0.487	1.074	0.972	0.962	0.97	1.021	0.944	0.984	1.009	1.037	1.27281	1.30967	1.3711	0.963918	0.955926
CSA010083.1	298	K	eukaryotic initiation factor 4A-2	3	3	1	0.0112707	63.076	VDWLTDK(1)MR	2	-0.55709	2	1	4.33271e-08	152.17	VDWLTDK(1)MR	2	0.54514	3	1	5.71159e-05	151.13	VDWLTDK(1)MR	2	-0.71316	4	0.995	1.191	1.042	1.119	1.031	0.983	0.953	0.705	1.011	1.074	0.972	0.962	0.97	1.021	0.944	0.984	1.009	1.037	0.926443	1.22531	1.08316	1.15361	1.00979
CSA010150.1	337	K	uncharacterized protein LOC100246491 isoform X3	3	3	1	4.65871e-12	156.52	ECFDPIVAK(1)SGR	2	0.95793	1	1	1.46596e-08	137.88	ECFDPIVAK(1)SGR	2	0.044727	1	1	5.68069e-07	146.67	ECFDPIVAK(1)SGR	2	-0.098402	1	0.721	0.751	0.772	1.503	1.287	1.328	1.014	1.203	1.126
CSA010160.1	70	K	dihydrolipoyl dehydrogenase 1, mitochondrial	3	3	1	1.85106e-19	166.9	AAQLGLK(1)TTCIEK	2	-0.66976	2	1	3.67395e-12	148.57	AAQLGLK(1)TTCIEK	3	-0.23063	2	1	6.51198e-09	159.22	AAQLGLK(1)TTCIEK	2	-0.022069	2	1.157	1.138	1.125	1.093	1.108	1.1	0.672	0.711	0.69	0.808	0.773	0.783	0.925	0.943	0.938	1.316	1.338	1.34	1.43193	1.47219	1.43678	1.18162	1.17497
CSA010160.1	146	K	dihydrolipoyl dehydrogenase 1, mitochondrial	3	3	1	0.0023488	105.52	GIEGLFK(1)K	2	-1.303	1	1	0.00415375	93.649	GIEGLFK(1)K	3	0.83206	2	1	0.00176966	105.52	GIEGLFK(1)K	3	-0.99292	2	0.882	0.92	0.852	1.128	1.105	1.1	1.164	1.108	1.253	0.808	0.773	0.783	0.925	0.943	0.938	1.316	1.338	1.34	1.09158	1.19017	1.08812	1.21946	1.17179
CSA010160.1	149	K	dihydrolipoyl dehydrogenase 1, mitochondrial	3	3	1	0.00168893	124.83	NK(1)VNYVK	2	0.23576	2	1	0.00467971	111.01	NK(1)VNYVK	2	2.4938	1	1	0.00208653	124.83	NK(1)VNYVK	2	1.2265	2	0.95	0.979	0.927	1.065	1.011	1.046	1.107	1.112	1.167	0.808	0.773	0.783	0.925	0.943	0.938	1.316	1.338	1.34	1.17574	1.26649	1.18391	1.15135	1.07211
CSA010160.1	154	K	dihydrolipoyl dehydrogenase 1, mitochondrial	3	3	1	0.000663123	121.73	VNYVK(1)GYGK	2	0.8422	1	1	0.00137341	118.71	VNYVK(1)GYGK	2	1.3113	1	1	0.00099611	117.31	VNYVK(1)GYGK	2	-0.34347	1	0.882	0.893	0.901	1.012	1.04	1.139	1.303	1.234	1.103	0.808	0.773	0.783	0.925	0.943	0.938	1.316	1.338	1.34	1.09158	1.15524	1.1507	1.09405	1.10286
CSA010160.1	201	K	dihydrolipoyl dehydrogenase 1, mitochondrial	3	3	1	7.21472e-08	142.83	SLPGITIDEK(1)R	3	-0.23509	2	1	5.36287e-21	178.95	SLPGITIDEK(1)R	3	-1.3895	2	1	1.99869e-30	207.95	SLPGITIDEK(1)R	3	0.23084	2	0.868	0.889	0.858	1.053	1.071	1.086	1.279	1.205	1.259	0.808	0.773	0.783	0.925	0.943	0.938	1.316	1.338	1.34	1.07426	1.15006	1.09579	1.13838	1.13574
CSA010160.1	334	K	dihydrolipoyl dehydrogenase 1, mitochondrial	3	3	1	0.0316266	67.214	IGVETDK(1)VGR	2	1.4534	1	1	0.00445689	85.924	IGVETDK(1)VGR	2	-1.0467	1	1	0.00674673	78.83	IGVETDK(1)VGR	2	-0.98021	1	1.075	1.026	1.042	0.869	0.934	0.898	1.105	1.116	1.122	0.808	0.773	0.783	0.925	0.943	0.938	1.316	1.338	1.34	1.33045	1.3273	1.33078	0.939459	0.990456
CSA010224.1	95	K	probable glutathione S-transferase	3	3	1	0.00284386	110.81	LISWAK(1)R	2	1.4755	1	1	0.00312768	108.09	LISWAK(1)R	2	-2.0992	1	1	2.05706e-06	155.51	LISWAK(1)R	2	-0.5025	2	1.028	0.988	0.992	1.312	1.255	1.28	0.655	0.81	0.736
CSA010320.1	471	K	AAA-ATPase ASD, mitochondrial-like	3	2	1	0.00918661	91.318	VLEDAK(1)K	2	-0.037065	1	1	0.0103245	91.318	VLEDAK(1)K	2	-0.49345	1	1	0.0116231	91.318	VLEDAK(1)K	2	-0.36665	1		1.008	0.999		1.012	0.975		1.057	1.111
CSA010324.1	201	K	chaperone protein ClpB1	3	3	1	2.05184e-40	200.58	TK(1)NNPVLIGEPGVGK	2	1.5085	2	1	2.88153e-06	88.427	TK(1)NNPVLIGEPGVGK	3	1.0608	2	1	3.50976e-17	160.64	TK(1)NNPVLIGEPGVGK	2	1.2585	2	0.918	0.963	0.83	1.106	1.084	1.033	1.119	1.055	1.384	0.969	0.986	0.976	0.859	0.856	0.84	1.187	1.156	1.162	0.947368	0.976673	0.85041	1.28754	1.26636
CSA010324.1	463	K	chaperone protein ClpB1	3	3	1	0.000663123	121.73	LQPLVMK(1)YK	2	-0.66915	1	1	7.24365e-08	147.2	LQPLVMK(1)YK	2	0.31554	1	1	6.06682e-10	160.59	LQPLVMK(1)YK	2	-0.74445	3	1.111	1.11	1.088	1.001	1.033	1.039	0.873	0.848	0.845	0.969	0.986	0.976	0.859	0.856	0.84	1.187	1.156	1.162	1.14654	1.12576	1.11475	1.16531	1.20678
CSA010324.1	749	K	chaperone protein ClpB1	3	3	0.970001	0.000775707	88.596	K(0.97)HFK(0.03)PELLNR	4	1.0642	1	0.944802	0.000677012	94.363	K(0.945)HFK(0.055)PELLNR	4	-0.090722	2	0.974073	0.000714828	88.596	K(0.974)HFK(0.026)PELLNR	4	0.53048	1	1.021	1.004	0.934	0.865	0.96	0.829	1.212	1.125	1.432	0.969	0.986	0.976	0.859	0.856	0.84	1.187	1.156	1.162	1.05366	1.01826	0.956967	1.00698	1.1215
CSA010324.1	752	K	chaperone protein ClpB1	3	3	1	0.000421359	111.06	HFK(1)PELLNR	3	1.7418	1	1	0.000791548	100.25	HFK(1)PELLNR	3	1.2577	1	1	0.00230956	76.17	HFK(1)PELLNR	3	2.1526	1	0.933	0.991	1.034	0.905	0.862	0.825	1.334	1.264	1.231	0.969	0.986	0.976	0.859	0.856	0.84	1.187	1.156	1.162	0.962848	1.00507	1.05943	1.05355	1.00701
CSA010324.1	895	K	chaperone protein ClpB1	3	3	1	0.00105193	112.13	SDAAQAVK(1)K	2	0.65243	1	1	0.00286468	90.05	SDAAQAVK(1)K	2	-2.3264	2	1	0.00204724	90.05	SDAAQAVK(1)K	2	-0.073549	1	0.884	1.014	1.072	0.725	0.658	0.588	1.648	1.459	1.456	0.969	0.986	0.976	0.859	0.856	0.84	1.187	1.156	1.162	0.912281	1.0284	1.09836	0.844005	0.768692
CSA010340.1	21	K	copper transport protein CCH-like	3	3	1	1.38682e-21	166.9	VGMSCQGCVGAVK(1)R	2	0.054204	4	1	2.95725e-28	180.95	VGMSCQGCVGAVK(1)R	3	-1.5991	4	1	2.10777e-09	139.46	VGMSCQGCVGAVK(1)R	2	0.24312	4	1.095	1.055	1.013	1.07	1.043	1.039	0.82	0.935	0.999	1.071	1.049	1.13	0.997	0.949	0.982	0.9	0.931	0.779	1.02241	1.00572	0.89646	1.07322	1.09905
CSA010369.1	367	K	protein disulfide-isomerase	3	3	1	1.72058e-08	111.07	K(1)SEPIPEVNDESVK	3	0.42907	1	1	9.90993e-08	103.32	K(1)SEPIPEVNDESVK	3	0.23298	1	1	2.83096e-09	128.73	K(1)SEPIPEVNDESVK	3	-0.47746	1	1.081	1.025	1.145	0.956	0.982	1.016	0.986	1.062	0.757	1.21	1.2	1.198	1	1.002	0.991	0.713	0.724	0.76	0.893388	0.854167	0.95576	0.956	0.98004
CSA010386.1	51	K	protein translation factor SUI1 homolog 2	3	3	1	2.90379e-05	132.32	SLTTVQGLK(1)K	2	-0.11172	1	1	4.24364e-09	155.97	SLTTVQGLK(1)K	2	0.8163	2	1	7.35799e-10	168.3	SLTTVQGLK(1)K	2	-0.50668	1	1.187	1.234	1.178	0.911	0.927	0.919	0.836	0.747	0.813	1.163	0.964		0.912	0.929		0.869	1.126		1.02064	1.28008		0.998904	0.997847
CSA010446.1	200	K	ruBisCO large subunit-binding protein subunit alpha	3	3	1	2.98488e-50	175.65	EVASK(1)TNDSAGDGTTTAAVLAR	3	0.45882	1	1	1.14067e-17	114.37	EVASK(1)TNDSAGDGTTTAAVLAR	3	-1.6321	1	1	1.20378e-41	170.32	EVASK(1)TNDSAGDGTTTAAVLAR	3	-0.69538	1	0.712	0.753	0.799	0.945	0.918	0.837	1.713	1.63	1.7	0.839	0.844	0.84	1.126	1.123	1.118	1.081	1.065	1.073	0.848629	0.89218	0.95119	0.839254	0.817453
CSA010446.1	552	K	ruBisCO large subunit-binding protein subunit alpha	3	3	1	0.000842924	119.74	DK(1)LEDADER	2	1.7792	1	1	0.0012864	119.39	DK(1)LEDADER	2	2.3569	1	1	0.000862654	119.74	DK(1)LEDADER	2	2.0964	1	0.86	0.901	0.885	1.119	1.159	1.115	1.212	1.081	1.167	0.839	0.844	0.84	1.126	1.123	1.118	1.081	1.065	1.073	1.02503	1.06754	1.05357	0.993783	1.03206
CSA010476.1	110	K	primary amine oxidase-like	3	3	1	0.00791876	101.54	DAQVK(1)FK	2	0.23753	2	1	0.00159667	101.43	DAQVK(1)FK	2	0.47021	3	1	0.00754424	101.54	DAQVK(1)FK	2	-0.2583	3	1.346	1.396	1.269	0.929	0.958	1.026	0.506	0.416	0.489	1.248	1.35	1.308	1.026	0.998	0.969	0.629	0.514	0.547	1.07853	1.03407	0.970183	0.905458	0.95992
CSA010476.1	126	K	primary amine oxidase-like	3	3	1	2.95732e-08	103.92	LYDPSEFHVINPSK(1)K	3	-0.66934	1	1	8.55457e-09	110.55	LYDPSEFHVINPSK(1)K	3	-1.2178	1	1	1.46326e-14	143.58	LYDPSEFHVINPSK(1)K	3	1.4368	1	1.301	1.408	1.329	1.053	0.96	0.992	0.441	0.394	0.409	1.248	1.35	1.308	1.026	0.998	0.969	0.629	0.514	0.547	1.04247	1.04296	1.01606	1.02632	0.961924
CSA010519.1	94	K	peroxiredoxin Q, chloroplastic-like	3	3	1	0.000538584	112.36	NVSLSK(1)FK	2	-0.36122	2	1	0.00129077	115.78	NVSLSK(1)FK	2	2.0283	1	1	0.000503585	123.75	NVSLSK(1)FK	2	0.59257	2	0.745	0.729	0.824	0.935	1.016	0.963	1.662	1.562	1.487	0.612	0.637	0.672	0.733	0.772	0.748	1.782	1.782	1.726	1.21732	1.14443	1.22619	1.27558	1.31606
CSA010528.1	27	K	60S ribosomal protein L27-3	3	3	1	7.54083e-12	153.81	AVIAK(1)NFDDGTR	2	-0.33274	2	1	3.98928e-17	168.82	AVIAK(1)NFDDGTR	2	-1.2575	1	1	2.93924e-10	160.18	AVIAK(1)NFDDGTR	3	0.11469	3	1.71	1.584	1.452	0.469	0.586	0.681	0.363	0.508	0.553	1.546	1.999	1.935	0.651	0.429	0.492	0.66	0.235	0.255	1.10608	0.792396	0.750388	0.72043	1.36597
CSA010780.1	710	K	protein TSS	3	3	1	3.45277e-07	138.24	DYDMNSPK(1)PFR	2	1.6117	1	1	1.25997e-09	153.74	DYDMNSPK(1)PFR	2	-0.23356	1	1	8.05559e-05	142.97	DYDMNSPK(1)PFR	2	0.58112	1	0.71	0.712	0.707	1.063	1.117	1.175	1.574	1.473	1.456	0.975	1.015	1.02	1.161	1.155	1.176	0.86	0.812	0.782	0.728205	0.701478	0.693137	0.91559	0.9671
CSA010785.1	48	K	glutamine synthetase cytosolic isozyme 1	3	3	1	0.000191721	116.24	TLSGPVSDPK(1)K	3	0.54108	3	1	3.41455e-14	159.99	TLSGPVSDPK(1)K	2	-0.021351	4	1	3.15267e-05	126.34	TLSGPVSDPK(1)K	3	-0.94406	2	0.992	0.752	0.549	0.905	0.866	0.8	1.222	1.692	2.262	0.675	0.645	0.636	0.859	0.84	0.865	1.537	1.595	1.583	1.46963	1.16589	0.863208	1.05355	1.03095
CSA010785.1	267	K	glutamine synthetase cytosolic isozyme 1	3	3	1	0.000622319	114.86	SDGGFEVIK(1)K	3	0.080804	6	1	0.000863811	114.86	SDGGFEVIK(1)K	3	0.03468	8	1	0.000431173	114.86	SDGGFEVIK(1)K	3	0.20332	7	0.819	0.813	0.778	0.869	0.862	0.881	1.598	1.587	1.685	0.675	0.645	0.636	0.859	0.84	0.865	1.537	1.595	1.583	1.21333	1.26047	1.22327	1.01164	1.02619
CSA010797.1	118	K	UDP-glucose 6-dehydrogenase 1	3	3	1	2.46615e-06	140.24	MIADVSK(1)SDK	3	-0.80304	3	1	1.61621e-08	150.09	MIADVSK(1)SDK	3	-1.2467	4	1	1.13562e-06	158.08	MIADVSK(1)SDK	3	-1.3846	5	1.32	1.289	1.28	0.818	0.836	0.787	0.692	0.751	0.77	1.257	1.168	1.289	0.939	0.961	0.956	0.665	0.827	0.69	1.05012	1.1036	0.993018	0.87114	0.869927
CSA010797.1	132	K	UDP-glucose 6-dehydrogenase 1	3	3	1	2.2338e-19	165.34	STVPVK(1)TAEAIEK	2	0.29119	1	1	5.18621e-24	179.79	STVPVK(1)TAEAIEK	2	-0.75882	1	1	7.26478e-08	151.8	STVPVK(1)TAEAIEK	2	0.7054	1	1.15	1.176	1.465	0.782	0.779	0.779	1.065	1.024	0.4	1.257	1.168	1.289	0.939	0.961	0.956	0.665	0.827	0.69	0.914877	1.00685	1.13654	0.832801	0.810614
CSA010797.1	307	K	UDP-glucose 6-dehydrogenase 1	3	3	1	0.00405413	110.53	INDYQK(1)SR	2	1.1578	1	1	0.00156956	112.36	INDYQK(1)SR	2	0.47477	2	1	0.00186313	110.47	INDYQK(1)SR	2	1.2972	2	1.184	1.326	1.246	1.1	0.981	0.984	0.611	0.516	0.59	1.257	1.168	1.289	0.939	0.961	0.956	0.665	0.827	0.69	0.941925	1.13527	0.966641	1.17146	1.02081
CSA010797.1	357	K	UDP-glucose 6-dehydrogenase 1	3	3	1	0.00642275	102.07	GLLGDK(1)AR	2	-0.22254	1	1	0.0143733	84.498	GLLGDK(1)AR	2	-0.86156	1	1	0.0163003	80.455	GLLGDK(1)AR	2	-1.2262	1	1.373	1.568	1.414	0.79	0.743	0.743	0.624	0.355	0.551	1.257	1.168	1.289	0.939	0.961	0.956	0.665	0.827	0.69	1.09228	1.34247	1.09697	0.841321	0.773153
CSA010813.1	476	K	uncharacterized protein LOC8266439	3	3	1	0.00698591	99.815	IYDQEK(1)LK	2	0.20591	1	1	0.00194162	107.79	IYDQEK(1)LK	2	0.15128	1	1	0.00221527	107.79	IYDQEK(1)LK	2	0.66236	1	0.71	0.714	0.699	1.479	1.437	1.67	1.066	1.096	0.841	0.709	0.763	0.736	1.281	1.358	1.237	1.037	0.938	1.09	1.00141	0.93578	0.949728	1.15457	1.05817
CSA010842.1	50	K	acyl carrier protein 2, mitochondrial	3	3	1	1.1055e-05	130.47	GSFLDK(1)SEVADR	2	-0.4605	1	1	4.91423e-32	195.1	GSFLDK(1)SEVADR	2	0.93423	2	1	2.0777e-07	155.09	GSFLDK(1)SEVADR	2	-1.7468	2	1.122	1.258	1.256	1.02	0.944	0.934	0.829	0.683	0.633	1.07	0.988	1.054	0.962	0.971	0.964	0.944	1.048	0.964	1.0486	1.27328	1.19165	1.06029	0.972194
CSA010842.1	306	K	acyl carrier protein 2, mitochondrial	3	2	1	3.38333e-18	135.99	VISVVK(1)NFQK	2	-0.78321	1	1	0.000228001	115.78	VISVVK(1)NFQK	3	1.5363	1	1	5.79925e-10	127.76	VISVVK(1)NFQK	2	-1.2149	2		0.98	0.94		1.119	1.087		0.985	1.089	1.07	0.988	1.054	0.962	0.971	0.964	0.944	1.048	0.964		0.991903	0.891841		1.15242
CSA010862.1	212	K	chlorophyll a-b binding protein CP29.1, chloroplastic	3	3	1	0.00143876	100.69	NAELDPEK(1)R	2	-1.4924	2	1	0.00179453	103.18	NAELDPEK(1)R	2	0.06204	3	1	0.00385174	82.831	NAELDPEK(1)R	2	0.027023	2	0.507	0.57	0.49	0.826	0.889	0.87	2.254	1.997	2.295	0.489	0.464	0.452	0.745	0.703	0.74	2.028	2.119	2.079	1.03681	1.22845	1.08407	1.10872	1.26458
CSA010982.1	40	K	protein BUD31 homolog 2	3	3	1	0.00373081	67.385	EAENDPHDGK(1)R	3	2.1766	2	1	0.000512371	88.155	EAENDPHDGK(1)R	3	0.46598	1	1	0.00657837	58.172	EAENDPHDGK(1)R	3	0.53874	2	1.588	1.646	1.532	0.648	0.666	0.717	0.379	0.302	0.342	1.291	1.406	1.311	0.974	0.934	0.97	0.625	0.591	0.602	1.23005	1.1707	1.16857	0.665298	0.713062
CSA011006.1	340	K	Serine/threonine-protein kinase SAPK2	3	3	1	1.01514e-06	109.6	FNIANPTTGCQK(1)K	3	-0.28318	2	1	1.28737e-09	143.46	FNIANPTTGCQK(1)K	2	-0.9132	4	1	2.73465e-06	135.91	FNIANPTTGCQK(1)K	3	-1.0121	3	1.251	1.44	1.589	0.753	0.58	0.52	0.904	0.776	0.477	2.005	1.901	1.73	0.452	0.462	0.455	0.221	0.328	0.476	0.62394	0.757496	0.918497	1.66593	1.25541
CSA011006.1	349	K	Serine/threonine-protein kinase SAPK2	3	2	1	2.84577e-10	110.08	LEIDDDQK(1)LR	2	2.3771	1	1	0.000166995	116.98	KLEIDDDQK(1)LR	3	-1.3708	1	1	0.000982658	89.231	KLEIDDDQK(1)LR	3	-0.69806	1		1.828	1.759		0.381	0.389		0.305	0.296	2.005	1.901	1.73	0.452	0.462	0.455	0.221	0.328	0.476		0.961599	1.01676		0.824675
CSA011006.1	533	K	Serine/threonine-protein kinase SAPK2	3	3	1	0.00149585	114.72	AK(1)SEAADYQK	2	0.86067	1	1	0.00178734	111.79	AK(1)SEAADYQK	2	0.28034	1	1	0.00100879	118.87	AK(1)SEAADYQK	2	0.16052	2	1.624	1.608	1.619	0.396	0.438	0.371	0.619	0.635	0.606	2.005	1.901	1.73	0.452	0.462	0.455	0.221	0.328	0.476	0.809975	0.845871	0.935838	0.876106	0.948052
CSA011007.1	93	K	phospho-2-dehydro-3-deoxyheptonate aldolase 1, chloroplastic-like	3	2	0.999999	0.00205249	76.24	KWTVDSWK(1)AK	3	-4.4879	1	0.999845	0.0264932	57.225	KWTVDSWK(1)AK	3	-2.3716	1	0.999864	0.0164006	63.164	KWTVDSWK(1)AK	3	-2.3771	1	1.14	1.046		0.733	0.917		1.143	1.102		1.697	1.504	1.553	0.634	0.712	0.704	0.446	0.609	0.579	0.671774	0.695479		1.15615	1.28792
CSA011007.1	197	K	phospho-2-dehydro-3-deoxyheptonate aldolase 1, chloroplastic-like	3	3	1	0.00356984	104.2	MAGQFAK(1)PR	2	-1.414	1	1	0.0317812	64.841	MAGQFAK(1)PR	2	-1.3504	1	1	0.0282224	65.404	MAGQFAK(1)PR	2	-1.6304	2	1.173	1.072	1.116	0.91	0.882	0.861	0.864	1.093	1.016	1.697	1.504	1.553	0.634	0.712	0.704	0.446	0.609	0.579	0.69122	0.712766	0.718609	1.43533	1.23876
CSA011007.1	412	K	phospho-2-dehydro-3-deoxyheptonate aldolase 1, chloroplastic-like	3	3	1	0.00851384	71.692	VK(1)LPHLIR	3	-0.29633	2	1	0.0358636	48.036	VK(1)LPHLIR	3	-0.36335	1	1	0.00300395	84.743	VK(1)LPHLIR	3	0.28461	1	1.278	0.92	1.167	0.769	0.812	0.788	0.832	1.45	1.004	1.697	1.504	1.553	0.634	0.712	0.704	0.446	0.609	0.579	0.753094	0.611702	0.751449	1.21293	1.14045
CSA011021.1	238	K	ATP-dependent Clp protease proteolytic subunit-related protein 4, chloroplastic	3	3	1	0.00491689	107.79	NVK(1)AELVK	2	-0.92501	1	1	0.00194162	107.79	NVK(1)AELVK	2	-0.15186	1	1	0.000917549	119.68	NVK(1)AELVK	2	0.51222	1	0.95	0.958	0.932	1.204	1.145	1.144	0.936	0.994	1.032	0.707	0.683	0.773	1.149	1.137	1.058	1.254	1.259	1.231	1.34371	1.40264	1.20569	1.04787	1.00704
CSA011032.1	65	K	60S ribosomal protein L18a-like	3	3	1	3.52876e-29	175.88	ALPTETDEHPK(1)IYR	3	0.86966	1	1	2.46207e-22	170.26	ALPTETDEHPK(1)IYR	3	-0.372	1	1	2.59867e-09	135.14	ALPTETDEHPK(1)IYR	3	0.55586	1	1.162	1.269	1.239	0.887	0.795	0.898	0.914	0.835	0.715	1.579	1.58	1.644	0.786	0.759	0.735	0.43	0.47	0.421	0.735909	0.803165	0.75365	1.1285	1.04743
CSA011032.1	190	K	60S ribosomal protein L18a-like	3	3	1	0.00707926	99.442	IK(1)FPLVFK	2	-0.10682	3	1	0.00178477	109.71	IK(1)FPLVFK	2	0.109	2	1	0.00196273	109.71	IK(1)FPLVFK	3	0.47967	2	1.77	1.63	1.831	0.524	0.667	0.432	0.178	0.329	0.091	1.579	1.58	1.644	0.786	0.759	0.735	0.43	0.47	0.421	1.12096	1.03165	1.11375	0.666667	0.878788
CSA011032.1	196	K	60S ribosomal protein L18a-like	3	3	1	0.0145744	86.866	FPLVFK(1)K	2	0.6763	2	1	0.0219578	83.614	FPLVFK(1)K	2	0.94705	2	1	0.0143877	86.866	FPLVFK(1)K	2	-1.098	2	1.538	1.5	1.677	0.599	0.667	0.544	0.537	0.565	0.265	1.579	1.58	1.644	0.786	0.759	0.735	0.43	0.47	0.421	0.974034	0.949367	1.02007	0.762087	0.878788
CSA011032.1	206	K	60S ribosomal protein L18a-like	3	0	0.997504	0.00626035	69.825	K(0.002)LK(0.998)TTYK	3	-1.0749	1	0.980885	0.0144417	60.91	K(0.019)LK(0.981)TTYK	3	-1.1095	1	0.999269	0.0190834	73.233	K(0.001)LK(0.999)TTYK	3	-0.88343	1										1.579	1.58	1.644	0.786	0.759	0.735	0.43	0.47	0.421
CSA011064.1	290	K	eukaryotic initiation factor 4A-3	3	3	1	1.44746e-09	151.22	K(1)VDWLTEK	2	1.1463	1	1	0.000342011	130.98	K(1)VDWLTEK	2	1.3418	1	1	1.77037e-06	148.32	K(1)VDWLTEK	2	0.37484	1	1.373	1.403	1.344	0.952	0.931	0.921	0.426	0.435	0.468	1.15	1.143	1.179	0.987	0.977	0.973	0.8	0.855	0.79	1.19391	1.22747	1.13995	0.964539	0.952917
CSA011124.1	723	K	DNA replication licensing factor MCM5	3	3	1	0.0166382	85.161	DEVEYK(1)R	2	0.3917	1	1	0.0170975	86.833	DEVEYK(1)R	2	-0.85641	1	1	0.0291469	77.318	DEVEYK(1)R	2	-0.61004	1	1.404	1.703	1.541	0.677	0.544	0.575	0.7	0.34	0.505	1.833	1.79	1.85	0.516	0.509	0.491	0.369	0.409	0.379	0.765957	0.951397	0.832973	1.31202	1.06876
CSA011152.1	145	K	nuclear transcription factor Y subunit C-9-like, partial	3	3	1	2.06777e-07	131.72	TLQK(1)NDIAAAITR	2	-1.1712	1	1	4.59697e-17	160.81	TLQK(1)NDIAAAITR	2	-0.52779	1	1	6.48344e-16	176.25	TLQK(1)NDIAAAITR	2	-0.77482	1	1.082	1.203	1.119	1.128	1.061	1.081	0.775	0.646	0.727
CSA011175.1	88	K	isocitrate dehydrogenase	3	3	1	0.000861503	89.08	YEVHGDMK(1)K	3	1.1832	2	1	0.000629509	107.21	YEVHGDMK(1)K	3	0.71426	2	1	0.000226929	112.71	YEVHGDMK(1)K	3	0.54746	2	0.945	0.964	0.929	1.056	1.028	1.014	1.127	1.116	1.204	0.855	0.917	0.912	1.057	1.014	1.001	1.146	1.06	1.096	1.10526	1.05125	1.01864	0.999054	1.01381
CSA011175.1	352	K	isocitrate dehydrogenase	3	3	1	0.000113385	124.08	VISEGK(1)HR	3	-0.4182	3	1	0.000517243	104.44	VISEGK(1)HR	3	-0.16747	2	1	0.00209076	89.698	VISEGK(1)HR	3	0.40488	2	0.933	0.99	0.907	1.05	0.965	0.97	1.158	1.144	1.304	0.855	0.917	0.912	1.057	1.014	1.001	1.146	1.06	1.096	1.09123	1.07961	0.994518	0.993377	0.951677
CSA011222.1	118	K	probable aldo-keto reductase 2	3	3	1	0.00091407	71.879	MFEQVNEIAEK(1)K	3	-1.307	1	1	0.000140564	89.507	MFEQVNEIAEK(1)K	3	-0.16605	2	1	8.05784e-05	97.69	MFEQVNEIAEK(1)K	3	-0.83301	1	0.989	1.087	1.128	0.905	0.905	0.807	1.226	1.039	1.06	1.081	0.978	1.073	0.746	0.763	0.695	1.233	1.278	1.27	0.914894	1.11145	1.05126	1.21314	1.18611
CSA011243.1	428	K	putative 3,4-dihydroxy-2-butanone kinase	3	3	1	0.000630319	86.463	GATAIHEDMK(1)K	3	0.43406	1	1	0.000579799	85.813	GATAIHEDMK(1)K	3	-0.57006	1	1	0.000268149	92.866	GATAIHEDMK(1)K	3	-0.73299	1	0.942	0.893	0.898	1.006	1.145	1.082	1.195	1.112	1.183	0.995	0.99	0.913	1.014	1.04	1.02	0.979	0.971	1.092	0.946734	0.90202	0.983571	0.99211	1.10096
CSA011382.1	138	K	superoxide dismutase	3	3	1	0.0102304	71.379	K(1)THGAPK	3	0.15523	2	1	0.00324776	71.379	K(1)THGAPK	3	0.9957	3	1	0.0182454	63.419	K(1)THGAPK	3	0.50501	2	0.56	0.747	0.365	0.771	0.812	0.611	2.219	1.764	2.882	0.458	0.529	0.512	0.893	0.867	0.881	1.877	1.724	1.788	1.22271	1.4121	0.712891	0.863382	0.936563
CSA011441.1	60	K	40S ribosomal protein S25-like, partial	3	3	1	0.00357097	104.22	LLSEAPK(1)YK	2	1.0553	1	1	0.00371986	104.22	LLSEAPK(1)YK	2	-0.18294	1	1	0.000766127	121.5	LLSEAPK(1)YK	2	1.9688	1	1.311	1.456	1.432	0.805	0.771	0.693	0.724	0.526	0.581		1.284	1.354		0.837	0.835		0.784	0.688		1.13396	1.05761		0.921147
CSA011523.1	18	K	cyanate hydratase 2 isoform X1	3	3	1	1.15282e-17	167.73	AATVNSLQAVK(1)R	2	1.3185	3	1	9.09847e-24	179.67	AATVNSLQAVK(1)R	2	0.80866	1	1	3.52662e-41	222.73	AATVNSLQAVK(1)R	2	2.0426	2	0.918	0.929	0.93	0.907	0.857	0.885	1.361	1.381	1.367	0.61	0.613	0.616	0.739	0.699	0.705	1.822	1.867	1.85	1.50492	1.5155	1.50974	1.22733	1.22604
CSA011564.1	616	K	phosphoenolpyruvate carboxylase, housekeeping isozyme	3	3	1	0.000299055	127.17	AQEELIK(1)VAK	2	-0.63501	1	1	0.000219928	127.17	AQEELIK(1)VAK	2	0.49856	1	1	0.000989557	119.39	AQEELIK(1)VAK	2	-0.67813	1	0.825	0.755	0.815	1.204	1.174	1.186	1.18	1.329	1.22	1.238		1.132	0.994		1.019	0.676		0.797	0.666397		0.719965	1.21127
CSA011607.1	150	K	ADP,ATP carrier protein, mitochondrial-like	3	3	1	0.00172959	110.41	GIGECFK(1)R	2	-0.52792	2	1	0.00128768	108.74	GIGECFK(1)R	2	-0.58614	1	1	0.00284018	99.136	GIGECFK(1)R	2	-0.66979	1	1.132	1.196	1.208	0.984	1.034	0.954	0.854	0.691	0.707	1.032	1.029	1.042	0.985	0.986	1.001	0.938	0.964	0.955	1.0969	1.16229	1.15931	0.998985	1.04868
CSA011607.1	258	K	ADP,ATP carrier protein, mitochondrial-like	3	3	1	5.31067e-05	119.79	TMK(1)TDGIAGLYR	2	-1.1152	1	1	5.89179e-05	113.59	TMK(1)TDGIAGLYR	2	-1.4327	1	1	1.71618e-05	136.72	TMK(1)TDGIAGLYR	2	-0.30901	1	1.094	1.178	1.129	1.064	1.007	1.047	0.83	0.755	0.751	1.032	1.029	1.042	0.985	0.986	1.001	0.938	0.964	0.955	1.06008	1.1448	1.08349	1.0802	1.0213
CSA011607.1	391	K	ADP,ATP carrier protein, mitochondrial-like	3	0	1	0.00283777	64.711	LQLIVFGK(1)K	3	-0.25152	2	1	0.00199739	79.148	LQLIVFGK(1)K	2	1.6327	2	1	0.00352176	63.816	LQLIVFGK(1)K	3	-0.83604	2										1.032	1.029	1.042	0.985	0.986	1.001	0.938	0.964	0.955
CSA011619.1	32	K	heat shock 70 kDa protein 14-like	3	3	1	1.08193e-05	126.09	GIDVVLNDESK(1)R	2	0.67676	2	1	5.76303e-12	149.57	GIDVVLNDESK(1)R	3	1.5175	4	1	4.50185e-16	186.51	GIDVVLNDESK(1)R	3	-0.073844	4	1.034	1.146	1.11	1.068	1.05	1.078	0.94	0.763	0.749	1.262	1.24	1.255	0.962	0.967	0.968	0.657	0.703	0.733	0.819334	0.924194	0.884462	1.11019	1.08583
CSA011619.1	44	K	heat shock 70 kDa protein 14-like	3	3	1	1.40876e-13	153.14	ETPAIVCFGDK(1)QR	2	0.56267	1	1	1.64191e-32	195.94	ETPAIVCFGDK(1)QR	2	0.20158	2	1	1.46432e-41	219.35	ETPAIVCFGDK(1)QR	3	0.21231	2	1.563	1.623	1.582	0.7	0.733	0.738	0.366	0.266	0.213	1.262	1.24	1.255	0.962	0.967	0.968	0.657	0.703	0.733	1.23851	1.30887	1.26056	0.727651	0.758014
CSA011619.1	68	K	heat shock 70 kDa protein 14-like	3	3	1	0.00892074	83.456	NTISQVK(1)R	3	1.0294	2	1	0.0010132	113.62	NTISQVK(1)R	2	0.66952	1	1	0.00435415	76.478	NTISQVK(1)R	3	1.8172	2	1.336	1.419	1.175	0.925	0.96	0.965	0.53	0.373	0.76	1.262	1.24	1.255	0.962	0.967	0.968	0.657	0.703	0.733	1.05864	1.14435	0.936255	0.961538	0.992761
CSA011619.1	219	K	heat shock 70 kDa protein 14-like	3	2	1	0.000443645	82.705	GQLK(1)ILAHSFDR	3	-1.1481	1	1	0.000327498	84.892	GQLK(1)ILAHSFDR	3	1.683	1	1	0.000756992	77.279	GQLK(1)ILAHSFDR	3	-2.5219	1		1.036	1.106		1.032	0.927		0.984	0.951	1.262	1.24	1.255	0.962	0.967	0.968	0.657	0.703	0.733		0.835484	0.881275		1.06722
CSA011636.1	703	K	uncharacterized protein LOC107862820	3	1	1	0.0190462	85.67	DLLLQK(1)LR	2	1.0556	1	1	0.021561	78.113	DLLLQK(1)LR	2	-2.4564	1	1	0.00945185	86.67	DLLLQK(1)LR	2	0.26648	1			1.148			1.112			0.63	1.118	1.134	1.059	0.985	1.043	1.058	0.853	0.768	0.856			1.08404
CSA011668.1	131	K	glyceraldehyde-3-phosphate dehydrogenase, cytosolic-like	3	3	1	1.56845e-23	176.97	TVDGPSSK(1)DWR	2	-0.68168	1	1	9.87421e-21	176.87	TVDGPSSK(1)DWR	2	-0.41612	4	1	4.48379e-10	171.85	TVDGPSSK(1)DWR	2	-0.3741	2	0.941	0.876	0.981	1.086	1.095	1.054	1.1	1.2	1.045	1.122	1.096	1.078	0.986	0.999	0.996	0.881	0.874	0.886	0.838681	0.79927	0.910019	1.10142	1.0961
CSA011668.1	189	K	glyceraldehyde-3-phosphate dehydrogenase, cytosolic-like	3	3	1	0.00731747	86.898	K(1)ATYDEIK	2	-0.58873	2	1	0.00358824	96.143	K(1)ATYDEIK	2	-0.81016	2	1	0.00316671	98.048	K(1)ATYDEIK	2	0.60074	2	1.02	1.138	1.084	0.944	0.996	1.066	1.119	0.841	0.817	1.122	1.096	1.078	0.986	0.999	0.996	0.881	0.874	0.886	0.909091	1.03832	1.00557	0.957404	0.996997
CSA011729.1	155	K	allene oxide cyclase	3	3	1	0.000285497	121.5	IYSGDLQK(1)R	2	0.67939	5	1	0.00245007	106.35	IYSGDLQK(1)R	2	-0.33137	2	1	7.59583e-07	154.85	IYSGDLQK(1)R	2	-0.013727	5	0.839	0.779	0.786	0.963	0.993	0.944	1.445	1.496	1.588	0.959	1	0.925	1.01	1.039	1.005	1.053	0.954	1.106	0.87487	0.779	0.84973	0.953465	0.955727
CSA011778.1	161	K	CBS domain-containing protein CBSX3, mitochondrial	3	3	1	0.000654063	121.9	LITVK(1)PDTK	2	-0.010092	1	1	0.00384798	96.113	LITVK(1)PDTK	2	-0.10074	1	1	0.00108741	110.39	LITVK(1)PDTK	3	-0.17495	2	0.813	0.855	0.871	0.969	1.027	1.091	1.489	1.318	1.226	0.896	0.847	0.881	1.047	1.036	1.064	1.092	1.131	1.096	0.907366	1.00945	0.988649	0.925501	0.991313
CSA011809.1	719	K	DNA replication licensing factor MCM4	3	3	1	0.00459529	90.15	FSELVEK(1)K	3	0.51139	2	1	0.00358824	96.143	FSELVEK(1)K	2	0.55379	1	1	0.00406317	78.939	FSELVEK(1)K	3	0.59319	2	1.738	1.913	1.728	0.476	0.39	0.49	0.303	0.138	0.228	1.559	1.712	1.702	0.612	0.542	0.571	0.569	0.49	0.512	1.11482	1.11741	1.01528	0.777778	0.719557
CSA011817.1	78	K	small heat shock protein, chloroplastic-like	3	3	0.861131	0.00060768	85.522	SQQQSQPPK(0.139)K(0.861)R	3	1.0297	1	0.876507	0.000655381	106.67	SQQQSQPPK(0.123)K(0.877)R	3	2.3398	1	0.848526	0.00277388	80.014	SQQQSQPPK(0.151)K(0.849)R	3	1.9207	1	0.47	0.437	0.421	0.829	0.752	0.769	2.322	2.397	2.566	0.564	0.629	0.576	0.826	0.854	0.855	1.77	1.697	1.725	0.833333	0.694754	0.730903	1.00363	0.880562
CSA011817.1	172	K	small heat shock protein, chloroplastic-like	3	3	1	0.00308372	113.62	MLVVK(1)AEK	3	-0.66909	2	1	0.00392242	100.02	MLVVK(1)AEK	2	-1.0146	1	1	0.00145043	113.62	MLVVK(1)AEK	2	-0.40954	1	0.742	0.658	0.636	0.935	0.951	0.948	1.666	1.761	1.893	0.564	0.629	0.576	0.826	0.854	0.855	1.77	1.697	1.725	1.3156	1.0461	1.10417	1.13196	1.11358
CSA011851.1	380	K	uncharacterized protein LOC100261386 isoform X2	3	3	1	0.00467291	80.834	ESFTCSVAK(1)R	2	1.3392	1	1	0.00234512	96.756	ESFTCSVAK(1)R	2	2.4098	1	1	0.0203748	63.401	ESFTCSVAK(1)R	2	2.1764	1	1.199	1.302	1.244	0.922	0.999	0.892	0.799	0.539	0.712	1.269	1.257	1.258	0.946	1.081	1.019	0.697	0.552	0.585	0.944838	1.0358	0.988871	0.97463	0.924144
CSA011908.1	75	K	probable fructose-bisphosphate aldolase 3, chloroplastic	3	2	1	1.5764e-13	134.61	GILAIDESNATCGK(1)R	3	-1.5559	1	1	5.61984e-60	226.24	GILAIDESNATCGK(1)R	2	-1.4447	2	1	2.00249e-18	170.79	GILAIDESNATCGK(1)R	2	-0.16882	2		1.355	1.279		1.085	1.14		0.341	0.321	1.221	1.216	1.255	0.973	0.911	0.906	0.692	0.728	0.731		1.11431	1.01912		1.191
CSA011908.1	289	K	probable fructose-bisphosphate aldolase 3, chloroplastic	3	2	1	0.00109134	95.605	HTLTMLK(1)R	3	-0.018796	1	1	0.00345124	80.438	HTLTMLK(1)R	2	-3.3124	2	1	0.00086706	98.933	HTLTMLK(1)R	3	0.14228	1	1.036	1.161		1.022	1.087		0.993	0.692		1.221	1.216	1.255	0.973	0.911	0.906	0.692	0.728	0.731	0.848485	0.95477		1.05036	1.19319
CSA011908.1	348	K	probable fructose-bisphosphate aldolase 3, chloroplastic	3	3	1	3.60178e-12	143.05	TWQGHPK(1)NVEAAQK	3	1.715	2	1	1.22627e-13	142.54	TWQGHPK(1)NVEAAQK	3	0.90797	2	1	2.70321e-09	119.54	TWQGHPK(1)NVEAAQK	3	-0.70527	1	1.372	1.414	1.455	0.843	0.858	0.785	0.56	0.5	0.412	1.221	1.216	1.255	0.973	0.911	0.906	0.692	0.728	0.731	1.12367	1.16283	1.15936	0.866393	0.941822
CSA011916.1	4	K	probable histone H2A variant 3	3	3	1	1.65891e-11	147.24	AGK(1)GGK(1)GLLAGK	3	-1.3839	4	1	1.39589e-08	134.99	AGK(1)GGK(1)GLLAGK	3	-1.499	6	1	2.34072e-05	136.38	AGK(1)GGK(1)GLLAGK	2	-4.1768	5	1.353	1.449	1.389	0.803	0.783	0.802	0.646	0.526	0.528	1.399	1.311	1.633	0.838	0.887	0.683	0.614	0.692	0.48	0.967119	1.10526	0.850582	0.958234	0.882751
CSA011916.1	7	K	probable histone H2A variant 3	3	3	1	2.88125e-28	147.24	GGK(1)GLLAGK(1)TTAAAVAAK	3	0.62118	9	1	1.39589e-08	134.99	GGK(1)GLLAGK	2	0.72557	10	1	2.34072e-05	136.38	GGK(1)GLLAGK	3	-0.63325	9	1.431	1.474	1.377	0.778	0.765	0.779	0.526	0.499	0.583	1.399	1.311	1.633	0.838	0.887	0.683	0.614	0.692	0.48	1.02287	1.12433	0.843233	0.928401	0.862458
CSA011916.1	13	K	probable histone H2A variant 3	3	2	1	1.53332e-30	182.57	GLLAGK(1)TTAAAVAAK	2	-0.61322	2	1	9.1189e-121	224.33	GLLAGK(1)TTAAAVAAK	2	1.0852	1	1	1.98604e-36	209.13	GLLAGK(1)TTAAAVAAK	2	0.25901	1	1.59		1.516	0.609		0.652	0.424		0.458	1.399	1.311	1.633	0.838	0.887	0.683	0.614	0.692	0.48	1.13653		0.928353	0.72673
CSA011916.1	22	K	probable histone H2A variant 3	3	3	1	5.35447e-05	129.37	TTAAAVAAK(1)EK	2	-0.80291	2	1	0.000411508	116.51	TTAAAVAAK(1)EK	2	3.2363	1	1	0.000358496	116.51	TTAAAVAAK(1)EK	3	-0.20911	4	1.588	1.595	1.359	0.775	0.869	0.83	0.225	0.159	0.555	1.399	1.311	1.633	0.838	0.887	0.683	0.614	0.692	0.48	1.1351	1.21663	0.832211	0.924821	0.979707
CSA011916.1	133	K	probable histone H2A variant 3	3	3	1	5.28353e-06	135.99	SLINK(1)TTK	2	0.52077	4	1	0.00119003	129.82	SLINK(1)TTK	2	0.68295	3	1	0.00141054	124.42	SLINK(1)TTK	2	0.84522	3	1.669	1.733	1.573	0.515	0.497	0.587	0.385	0.34	0.424	1.399	1.311	1.633	0.838	0.887	0.683	0.614	0.692	0.48	1.19299	1.32189	0.963258	0.614558	0.560316
CSA011928.1	117	K	elongation factor 2	3	3	1	0.000534139	110.53	IMDMK(1)HNIR	2	0.24864	7	1	0.00282185	110.47	IMDMK(1)HNIR	2	0.50674	3	1	0.00205688	95.483	IMDMK(1)HNIR	2	0.49231	8	1.12	1.049	1.076	1.052	1.052	1.031	0.795	0.936	0.879	1.19	1.204	1.163	0.991	0.987	0.998	0.723	0.683	0.736	0.941176	0.871262	0.925193	1.06155	1.06586
CSA011928.1	333	K	elongation factor 2	3	3	1	5.81193e-12	155.43	MYASK(1)FGVDEAK	3	-0.65502	3	1	5.3883e-17	167.32	MYASK(1)FGVDEAK	3	0.17156	2	1	6.21342e-07	145.43	MYASK(1)FGVDEAK	2	-0.35661	3	1.227	1.315	1.239	1.085	1.043	1.047	0.547	0.465	0.524	1.19	1.204	1.163	0.991	0.987	0.998	0.723	0.683	0.736	1.03109	1.09219	1.06535	1.09485	1.05674
CSA011928.1	361	K	elongation factor 2	3	3	1	1.3186e-17	171.21	WTTK(1)NTGSATCK	2	0.53673	3	1	4.10257e-12	154.65	WTTK(1)NTGSATCK	2	1.551	3	1	2.32926e-22	196.33	WTTK(1)NTGSATCK	2	0.91039	3	1.371	1.394	1.389	1.009	0.992	0.987	0.359	0.379	0.29	1.19	1.204	1.163	0.991	0.987	0.998	0.723	0.683	0.736	1.1521	1.15781	1.19433	1.01816	1.00507
CSA011928.1	369	K	elongation factor 2	3	3	1	0.00334765	87.184	NTGSATCK(1)R	2	-0.77398	2	1	0.000973668	101.39	NTGSATCK(1)R	3	-0.42691	3	1	0.00162985	93.839	NTGSATCK(1)R	2	-2.4064	5	1.381	1.365	1.287	0.988	1.056	1	0.366	0.358	0.484	1.19	1.204	1.163	0.991	0.987	0.998	0.723	0.683	0.736	1.1605	1.13372	1.10662	0.996973	1.06991
CSA011928.1	407	K	elongation factor 2	3	3	0.999999	4.4967e-18	155.1	LGVTMK(1)SDEKDLMGK	3	-1.4314	2	1	1.95859e-08	112.84	LGVTMK(1)SDEK	2	-0.52461	2	1	0.000945672	120.57	LGVTMK(1)SDEK	2	1.0994	1	1.146	1.152	1.19	1.015	1.047	1.024	0.786	0.755	0.652	1.19	1.204	1.163	0.991	0.987	0.998	0.723	0.683	0.736	0.963025	0.956811	1.02322	1.02422	1.06079
CSA011928.1	411	K	elongation factor 2	3	3	1	0.00153441	116.55	SDEK(1)DLMGK	2	-0.073719	1	1	0.00380397	98.898	SDEK(1)DLMGK	2	0.30372	1	1	0.000408714	128.01	SDEK(1)DLMGK	2	1.3879	1	1.299	1.254	1.202	0.992	0.977	0.999	0.52	0.652	0.662	1.19	1.204	1.163	0.991	0.987	0.998	0.723	0.683	0.736	1.0916	1.04153	1.03353	1.00101	0.989868
CSA011928.1	490	K	elongation factor 2	3	3	1	0.0013689	117.31	MIPASDK(1)GR	2	-0.74083	2	1	1.00166e-12	170.69	MIPASDK(1)GR	2	-0.13947	2	1	2.07901e-10	169.77	MIPASDK(1)GR	2	0.18797	1	1.231	1.198	1.207	0.956	0.989	0.968	0.696	0.74	0.69	1.19	1.204	1.163	0.991	0.987	0.998	0.723	0.683	0.736	1.03445	0.995017	1.03783	0.964682	1.00203
CSA011928.1	528	K	elongation factor 2	3	3	1	6.51347e-07	145.91	DLYVK(1)SVQR	3	1.224	3	1	0.000900423	123.51	DLYVK(1)SVQR	2	0.70228	1	1	0.000205115	133.89	DLYVK(1)SVQR	2	0.53524	1	1.14	1.099	1.202	1.026	1.076	0.97	0.788	0.818	0.698	1.19	1.204	1.163	0.991	0.987	0.998	0.723	0.683	0.736	0.957983	0.912791	1.03353	1.03532	1.09017
CSA011928.1	539	K	elongation factor 2	3	3	1	0.00065595	118.5	TVIWMGK(1)K	2	0.24972	6	1	0.00135339	107.57	TVIWMGK(1)K	3	2.7948	5	1	0.000695269	118.5	TVIWMGK(1)K	3	2.0571	5	1.077	1.202	1.117	1.007	0.969	1.038	0.931	0.757	0.788	1.19	1.204	1.163	0.991	0.987	0.998	0.723	0.683	0.736	0.905042	0.998339	0.960447	1.01615	0.981763
CSA011928.1	583	K	elongation factor 2	3	3	1	0.000259985	118.88	AMK(1)FSVSPVVR	2	-0.52624	3	1	0.00123675	108.5	AMK(1)FSVSPVVR	2	-1.965	3	1	0.000284222	136.38	AMK(1)FSVSPVVR	2	1.5858	3	1.201	1.096	1.053	0.965	1.026	1	0.742	0.881	0.967	1.19	1.204	1.163	0.991	0.987	0.998	0.723	0.683	0.736	1.00924	0.910299	0.905417	0.973764	1.03951
CSA011928.1	684	K	elongation factor 2	3	3	1	0.00238622	95.352	SPNK(1)HNR	3	2.0219	3	1	0.0026594	93.195	SPNK(1)HNR	3	0.87019	2	1	0.0119544	75.189	SPNK(1)HNR	3	1.3489	3	0.989	1.032	0.934	0.956	0.844	1.069	1.164	1.21	1.125	1.19	1.204	1.163	0.991	0.987	0.998	0.723	0.683	0.736	0.831092	0.857143	0.803095	0.964682	0.855117
CSA011933.1	324	K	5-methyltetrahydropteroyltriglutamate--homocysteine methyltransferase	3	3	1	0.00328673	98.156	GTK(1)TLDLIK	3	-0.79347	2	1	0.0038157	98.156	GTK(1)TLDLIK	2	-1.0517	1	1	0.00112003	102.4	GTK(1)TLDLIK	3	-0.21806	2	1.124	1.178	1.137	1.078	1.068	1.043	0.754	0.684	0.739	1.126	1.108	1.105	1.049	1.05	1.071	0.804	0.783	0.764	0.998224	1.06318	1.02896	1.02765	1.01714
CSA011948.1	86	K	proteasome subunit beta type-5	3	2	1	2.46041e-07	99.161	ASMGGYISSQSVK(1)K	3	0.61386	2	1	0.00387665	58.885	ASMGGYISSQSVK(1)K	3	0.16618	1	1	3.48527e-09	118.24	ASMGGYISSQSVK(1)K	3	0.6536	2	0.999		1.009	0.99		1.052	1.106		0.992	1.031	1.013	1.079	1.061	1.002	1.07	0.861	0.98	0.859	0.968962		0.935125	0.933082
CSA011948.1	116	K	proteasome subunit beta type-5	3	3	1	0.0152948	95.541	NLGIK(1)CR	2	-1.3686	1	1	0.00508989	104.45	NLGIK(1)CR	2	-1.3638	1	1	0.0135534	94.662	NLGIK(1)CR	2	-1.5536	1	1.181	1.188	1.141	1.042	1.108	1.086	0.689	0.621	0.676	1.031	1.013	1.079	1.061	1.002	1.07	0.861	0.98	0.859	1.14549	1.17275	1.05746	0.982092	1.10579
CSA011948.1	125	K	proteasome subunit beta type-5	3	3	1	0.00172959	110.41	LHELANK(1)R	2	-0.54609	2	1	2.79177e-06	151.44	LHELANK(1)R	2	-0.76844	2	1	0.000183574	123.72	LHELANK(1)R	2	-0.54087	3	1.257	1.274	1.126	0.914	0.934	0.906	0.696	0.667	0.938	1.031	1.013	1.079	1.061	1.002	1.07	0.861	0.98	0.859	1.2192	1.25765	1.04356	0.861451	0.932136
CSA011978.1	23	K	60S ribosomal protein L44-like	3	3	1	0.000915329	87.568	HTLHK(1)VTQYK	3	0.68439	2	1	0.000820145	90.05	HTLHK(1)VTQYK	3	-0.01866	2	1	0.00395891	69.786	HTLHK(1)VTQYK	2	1.3537	3	1.6	1.73	1.568	0.567	0.526	0.533	0.455	0.312	0.502	1.864	1.947	1.918	0.43	0.382	0.438	0.425	0.362	0.345	0.858369	0.888546	0.817518	1.3186	1.37696
CSA011978.1	39	K	60S ribosomal protein L44-like	3	3	1	0.00226493	90.263	DSLAAQGK(1)R	2	-0.70307	2	1	0.00787142	75.387	DSLAAQGK(1)R	3	-0.52364	2	1	0.00405848	82.261	DSLAAQGK(1)R	3	-0.64868	3	1.868	1.847	1.634	0.284	0.299	0.351	0.281	0.364	0.599	1.864	1.947	1.918	0.43	0.382	0.438	0.425	0.362	0.345	1.00215	0.948639	0.851929	0.660465	0.782723
CSA011978.1	85	K	60S ribosomal protein L44-like	3	3	1	0.000445504	98.044	HVSQHPIK(1)R	3	0.027732	1	1	0.000197743	121.73	HVSQHPIK(1)R	3	-0.55752	1	1	0.000236445	101.65	HVSQHPIK(1)R	3	-0.2358	1	1.705	1.91	1.692	0.42	0.25	0.451	0.431	0.306	0.353	1.864	1.947	1.918	0.43	0.382	0.438	0.425	0.362	0.345	0.9147	0.980996	0.882169	0.976744	0.65445
CSA011986.1	14	K	anthocyanidin reductase	3	3	1	0.00126232	101.39	K(1)TSHLLALK	3	-0.085556	2	1	0.000944824	116.55	K(1)TSHLLALK	2	0.6961	2	1	0.000715706	86.898	K(1)TSHLLALK	3	-0.38196	1	1.223	1.249	1.431	0.703	0.882	0.583	1.02	0.772	0.723	1.351	1.408	1.504	0.699	0.634	0.63	0.777	0.808	0.747	0.905255	0.887074	0.951463	1.00572	1.39117
CSA012029.1	67	K	PHD finger protein ALFIN-LIKE 2	3	3	1	0.000529415	78.505	DKPSMDSGNK(1)SR	3	-0.91202	1	1	0.000100276	99.991	DKPSMDSGNK(1)SR	3	0.02255	1	0.999998	0.00437732	68.277	DKPSMDSGNK(1)SR	3	-0.065809	1	1.183	1.211	1.166	1.136	1.077	1.077	0.57	0.612	0.636	1.158	1.306	1.247	1.119	1.12	1.117	0.653	0.447	0.532	1.02159	0.927259	0.935044	1.01519	0.961607
CSA012037.1	185	K	aldehyde dehydrogenase family 3 member H1 isoform X2	3	0	1	0.0028823	64.485	IVNLHHFK(1)R	3	-1.2638	1	1	0.0131365	56.916	IVNLHHFK(1)R	3	-0.31314	1	1	0.00248141	66.299	IVNLHHFK(1)R	3	-1.3978	1										0.61	0.638	0.536	1.232	1.166	1.274	1.29	1.322	1.256
CSA012042.1	42	K	V-type proton ATPase subunit G 1	3	3	1	2.32837e-11	137.21	VAESSGDSGANVK(1)R	2	0.10305	2	1	2.26773e-16	152	VAESSGDSGANVK(1)R	2	-0.40854	2	1	8.25157e-18	168.69	KVAESSGDSGANVK(1)R	3	0.56421	1	0.769	0.789	0.77	1.038	1.092	1.063	1.489	1.362	1.469	0.674	0.683	0.683	0.967	0.892	0.974	1.487	1.574	1.519	1.14095	1.1552	1.12738	1.07342	1.22422
CSA012062.1	313	K	dihydroxy-acid dehydratase-like	3	3	1	0.00334222	99.34	DIITPK(1)SLR	2	0.57774	1	1	0.000692505	125.74	DIITPK(1)SLR	2	0.42799	1	1	0.00174586	97.472	DIITPK(1)SLR	2	-0.52724	1	0.913	1.06	0.883	1.101	1.059	1.101	1.134	0.909	1.188	1.06	1.11	1.12	1.033	1.034	1.007	0.887	0.818	0.808	0.861321	0.954955	0.788393	1.06583	1.02418
CSA012117.1	128	K	ADP,ATP carrier protein 1, mitochondrial	3	3	1	3.20116e-60	223.7	LLIQNQDEMIK(1)SGR	2	0.94451	1	1	1.79987e-58	218.28	LLIQNQDEMIK(1)SGR	2	-1.3123	1	1	3.82876e-33	210.34	LLIQNQDEMIK(1)SGR	2	0.90953	1	1.029	0.998	1.109	1.026	0.971	1.15	1.001	1.125	0.661	1.069	1.032	1.03	1.045	1.038	1.023	0.856	0.847	0.925	0.962582	0.967054	1.0767	0.981818	0.935453
CSA012117.1	241	K	ADP,ATP carrier protein 1, mitochondrial	3	3	1	5.34729e-20	169.3	K(1)TLASDGLAGLYR	2	-0.30598	1	1	5.28018e-24	176.56	K(1)TLASDGLAGLYR	3	0.31486	2	1	1.07576e-06	141.82	K(1)TLASDGLAGLYR	3	0.87351	2	1.019	1.047	1.118	1.07	0.982	1.135	0.969	1.022	0.661	1.069	1.032	1.03	1.045	1.038	1.023	0.856	0.847	0.925	0.953227	1.01453	1.08544	1.02392	0.94605
CSA012117.1	344	K	ADP,ATP carrier protein 1, mitochondrial	3	3	1	0.00259776	111.63	NEGPK(1)SLFK	2	0.12242	2	1	0.000649738	126.19	NEGPK(1)SLFK	3	-1.6237	3	1	0.000305869	129.89	NEGPK(1)SLFK	2	0.2825	3	1.024	1.011	1.014	1.143	1.19	1.136	0.868	0.845	0.874	1.069	1.032	1.03	1.045	1.038	1.023	0.856	0.847	0.925	0.957905	0.979651	0.984466	1.09378	1.14644
CSA012117.1	377	K	ADP,ATP carrier protein 1, mitochondrial	3	3	1	0.0126204	57.174	LQEIVLGK(1)K	3	0.45537	1	1	0.000761159	121.36	LQEIVLGK(1)K	2	1.7754	1	1	4.50087e-05	141.88	LQEIVLGK(1)K	3	0.3028	2	1.01	1.102	1.023	1.162	1.088	1.11	0.871	0.798	0.886	1.069	1.032	1.03	1.045	1.038	1.023	0.856	0.847	0.925	0.944808	1.06783	0.993204	1.11196	1.04817
CSA012133.1	123	K	protein DOWNY MILDEW RESISTANCE 6	3	3	1	0.000261545	124.83	YK(1)SVVHR	3	-0.099938	1	1	0.000988087	111.82	YK(1)SVVHR	3	0.34056	1	1	0.000524651	125.25	YK(1)SVVHR	3	0.025191	1	1.037	1.016	1.079	1.03	1.017	1.067	0.982	1.038	0.826	1.289	1.388	1.441	0.933	1.016	0.995	0.598	0.396	0.396	0.8045	0.731988	0.748786	1.10397	1.00098
CSA012137.1	127	K	replication factor C subunit 1	3	3	1	0.000737165	115.57	VVNVTPSK(1)K	2	-0.46475	1	1	0.00565798	77.062	VVNVTPSK(1)K	2	2.3979	1	1	0.000854387	100.88	VVNVTPSK(1)K	2	1.5303	1	1.221	1.252	1.175	1.108	1.127	1.139	0.529	0.48	0.537		0.888			1.002			1.153			1.40991			1.12475
CSA012185.1	89	K	adenosine kinase 2	3	3	1	0.0198892	77.744	DK(1)FGEEMK	2	-0.27176	2	1	0.00856307	90.05	DK(1)FGEEMK	2	-0.94232	2	1	0.00189412	100.88	DK(1)FGEEMK	2	-0.22744	2	1.591	1.567	1.541	0.751	0.752	0.712	0.249	0.346	0.33	1.445	1.447	1.432	0.87	0.864	0.866	0.544	0.528	0.528	1.10104	1.08293	1.07612	0.863218	0.87037
CSA012185.1	95	K	adenosine kinase 2	3	3	1	0.00107867	85.813	FGEEMK(1)K	3	-0.57565	4	1	0.00171312	103.91	FGEEMK(1)K	2	-0.060854	3	1	0.00174615	88.596	FGEEMK(1)K	3	-0.37205	4	1.52	1.392	1.437	0.77	0.809	0.792	0.363	0.596	0.443	1.445	1.447	1.432	0.87	0.864	0.866	0.544	0.528	0.528	1.0519	0.96199	1.00349	0.885057	0.936343
CSA012185.1	155	K	adenosine kinase 2	3	3	1	0.000330751	83.087	RPENWALVEK(1)AK	3	2.3457	2	1	8.23764e-08	134.06	RPENWALVEK(1)AK	3	0.74147	3	1	0.000528935	90.689	RPENWALVEK(1)AK	3	-0.08765	2	1.16	1.504	1.295	0.898	0.751	0.84	0.904	0.462	0.671	1.445	1.447	1.432	0.87	0.864	0.866	0.544	0.528	0.528	0.802768	1.03939	0.90433	1.03218	0.869213
CSA012185.1	335	K	adenosine kinase 2	3	3	1	0.000255505	109.72	SGCTYPEK(1)PDFH	2	-1.5494	3	1	7.99e-05	111.52	SGCTYPEK(1)PDFH	2	-0.65034	3	1	5.03421e-07	148.18	SGCTYPEK(1)PDFH	2	0.20253	3	1.236	1.272	1.327	0.862	0.892	0.812	0.8	0.718	0.645	1.445	1.447	1.432	0.87	0.864	0.866	0.544	0.528	0.528	0.855363	0.87906	0.926676	0.990805	1.03241
CSA012313.1	8	K	phospholipase D delta isoform X1	3	3	0.999755	0.000565413	85.533	NK(0.5)QK(0.5)GNK(1)APR	4	-0.77194	4	0.999223	0.00490777	57.785	NK(0.5)QK(0.5)GNK(0.999)APR	4	-1.1184	2	0.999755	0.000372489	86.898	NK(0.893)QK(0.107)GNK(1)APR	4	-0.64484	4	0.868	1.125	0.981	1.39	0.767	1.305	0.87	1.13	0.724
CSA012350.1	578	K	protein EXPORTIN 1A	3	3	1	0.0129453	74.415	AHWK(1)FLK	3	-1.0782	1	1	0.0129251	73.039	AHWK(1)FLK	3	-0.27232	1	1	0.0131823	73.039	AHWK(1)FLK	3	-0.46227	1	1.129	1.178	1.113	0.986	1.047	0.961	0.857	0.709	0.892	1.125	1.125	1.119	0.967	0.968	0.983	0.826	0.864	0.847	1.00356	1.04711	0.994638	1.01965	1.08161
CSA012350.1	1064	K	protein EXPORTIN 1A	3	3	1	0.000214332	98	NDLSTFK(1)NHIR	2	1.9997	2	1	0.00045212	106.58	NDLSTFK(1)NHIR	2	0.25605	2	1	0.000122566	128.85	NDLSTFK(1)NHIR	2	1.1581	2	1.031	1.164	1.142	1.044	0.96	1.033	0.974	0.836	0.74	1.125	1.125	1.119	0.967	0.968	0.983	0.826	0.864	0.847	0.916444	1.03467	1.02055	1.07963	0.991736
CSA012353.1	194	K	ATP sulfurylase 1, chloroplastic	3	3	1	0.000579866	78.705	DPAGMSHPVEK(1)R	3	-1.778	1	1	0.00121336	71.176	DPAGMSHPVEK(1)R	3	0.34191	1	1	0.0002213	89.43	DPAGMSHPVEK(1)R	3	0.43779	1	0.942	1.074	0.977	0.825	0.673	0.869	1.413	1.333	1.291
CSA012375.1	120	K	methyl-CpG-binding domain-containing protein 11-like	3	3	1	1.28963e-24	179.93	AIDTPESEPTK(1)K	3	-0.46425	2	1	5.92096e-24	182.1	AIDTPESEPTK(1)K	3	0.56922	3	1	1.56124e-22	196.7	AIDTPESEPTK(1)K	2	-0.4827	1	1.428	1.4	1.378	0.922	0.873	0.899	0.356	0.508	0.427	1.586	1.568	1.625	0.693	0.659	0.664	0.545	0.529	0.507	0.900378	0.892857	0.848	1.33045	1.32473
CSA012416.1	356	K	dynamin-related protein 4C	3	3	1	0.00760325	85.355	AAQNLIAK(1)MK	2	1.1363	1	1	0.0108929	74.841	AAQNLIAK(1)MK	2	-0.50339	1	1	0.000795633	99.568	AAQNLIAK(1)MK	2	-0.35894	1	0.874	0.973	0.952	1.328	1.149	1.192	0.932	0.961	0.929	0.733	0.721	0.7	1.589	1.666	1.631	0.703	0.656	0.722	1.19236	1.34951	1.36	0.835746	0.689676
CSA012423.1	46	K	glycylpeptide N-tetradecanoyltransferase 1-like	3	3	1	0.00131151	77.644	KVQESLSLAK(1)R	3	-1.3477	1	1	0.000851849	98.902	KVQESLSLAK(1)R	3	-0.3314	1	1	0.00299283	79.089	KVQESLSLAK(1)R	3	0.043087	1	1.118	1.188	1.103	1.048	1.115	1.074	0.802	0.612	0.768	1.145	0.922	1.106	1.077	1.019	1.014	0.753	1.087	0.826	0.976419	1.2885	0.997288	0.973073	1.09421
CSA012433.1	235	K	uncharacterized protein LOC100248360	3	3	1	0.00255452	103.74	RDFDILK(1)K	3	-0.12525	2	1	0.00248559	95.502	RDFDILK(1)K	3	-0.91375	2	1	0.00397346	103.74	RDFDILK(1)K	3	-0.98477	2	1.709	1.725	1.599	0.524	0.565	0.6	0.297	0.275	0.353	1.648	1.566	1.484	0.736	0.737	0.703	0.405	0.46	0.524	1.03701	1.10153	1.07749	0.711957	0.766621
CSA012486.1	50	K	proteasome subunit alpha type-2-B	3	3	1	0.00235388	65.408	AANGVVIATEK(1)K	3	0.67463	1	1	0.00770062	56.205	AANGVVIATEK(1)K	3	1.3415	1	1	0.00022351	89.301	AANGVVIATEK(1)K	3	0.19977	1	0.997	0.966	1.057	1.113	1.089	1.086	0.957	1.045	0.849	1.094	1.107	1.135	1.023	0.996	1.001	0.842	0.845	0.8	0.911335	0.872629	0.931278	1.08798	1.09337
CSA012503.1	129	K	protochlorophyllide reductase, chloroplastic	3	3	1	0.00323219	108.7	AAK(1)SAGIAK	3	0.91444	3	1	0.0193399	52.549	AAK(1)SAGIAK	3	1.7463	1	1	0.00170484	97.734	AAK(1)SAGIAK	3	1.7636	3	1.363	1.09	1.12	0.776	1.014	0.847	0.66	0.906	1.025	1.773	1.746	1.869	0.46	0.559	0.484	0.512	0.402	0.376	0.768754	0.624284	0.599251	1.68696	1.81395
CSA012503.1	344	K	protochlorophyllide reductase, chloroplastic	3	3	1	1.07484e-07	140.63	GFVSEEESGK(1)R	3	0.86326	2	1	2.15504e-05	130.1	GFVSEEESGK(1)R	2	-1.2922	2	1	3.80031e-06	150.06	GFVSEEESGK(1)R	3	0.14052	2	1.49	1.475	1.532	0.556	0.66	0.565	0.682	0.619	0.536	1.773	1.746	1.869	0.46	0.559	0.484	0.512	0.402	0.376	0.840384	0.844788	0.81969	1.2087	1.18068
CSA012506.1	22	K	stem-specific protein TSJT1-like	3	3	1	2.21973e-23	159.34	AFAHPPEELNSPASK(1)K	3	-0.016069	1	1	1.27929e-11	105.28	AFAHPPEELNSPASK(1)K	4	-0.055422	2	1	3.64792e-20	174.39	AFAHPPEELNSPASK(1)K	3	2.4641	1	0.952	0.96	1.01	1.197	1.181	1.236	0.94	0.948	0.754	1.04	0.998	0.924	1.238	1.202	1.113	0.688	0.784	0.812	0.915385	0.961924	1.09307	0.966882	0.982529
CSA012532.1	480	K	transketolase, chloroplastic	3	3	1	5.80271e-20	172.1	MFGDFQK(1)NTPEER	2	-0.10794	2	1	9.18738e-54	217.57	MFGDFQK(1)NTPEER	2	0.2094	3	1	5.32578e-23	195.78	MFGDFQK(1)NTPEER	2	0.98251	3	0.597	0.623	0.54	1.001	0.962	1.092	1.865	1.814	1.906	0.581	0.559	0.586	0.921	0.909	0.911	1.662	1.706	1.633	1.02754	1.11449	0.921502	1.08686	1.05831
CSA012532.1	710	K	transketolase, chloroplastic	3	3	1	0.0194575	66.799	HIGSK(1)GK	3	0.64039	2	1	0.0095222	77.741	HIGSK(1)GK	3	-0.43713	2	1	0.0179043	67.981	HIGSK(1)GK	3	0.071606	2	0.568	0.597	0.491	0.625	0.735	0.647	2.382	2.127	2.575	0.581	0.559	0.586	0.921	0.909	0.911	1.662	1.706	1.633	0.977625	1.06798	0.837884	0.67861	0.808581
CSA012532.1	727	K	transketolase, chloroplastic	3	3	1	5.99108e-08	141.58	FGASAPAGK(1)IYK	3	0.40429	6	1	1.33092e-09	145.31	FGASAPAGK(1)IYK	3	-0.93978	4	1	3.96022e-07	150.69	FGASAPAGK(1)IYK	3	-0.32225	5	0.583	0.584	0.553	1.048	1.043	1.067	1.837	1.791	1.911	0.581	0.559	0.586	0.921	0.909	0.911	1.662	1.706	1.633	1.00344	1.04472	0.943686	1.13789	1.14741
CSA012537.1	108	K	heat shock 70 kDa protein, mitochondrial-like	3	3	1	5.86028e-05	122.33	AELLVGTPAK(1)R	3	0.80561	2	1	0.000849573	108.56	AELLVGTPAK(1)R	3	0.0056344	2	1	3.50386e-05	134.49	AELLVGTPAK(1)R	3	-0.64915	2	1.102	0.961	0.924	1.171	1.029	1.066	0.685	1.122	1.15	1.115	1.112	1.106	1.095	1.105	1.09	0.701	0.734	0.75	0.988341	0.864209	0.835443	1.06941	0.931222
CSA012537.1	123	K	heat shock 70 kDa protein, mitochondrial-like	3	3	1	4.13004e-18	159.4	QAVTNPTNTLFGTK(1)R	2	0.36572	4	1	1.45489e-21	161.24	QAVTNPTNTLFGTK(1)R	3	1.3894	2	1	2.16128e-36	204.07	QAVTNPTNTLFGTK(1)R	2	0.38701	6	1.05	1.082	1.041	1.063	1.054	1.04	0.915	0.875	0.941	1.115	1.112	1.106	1.095	1.105	1.09	0.701	0.734	0.75	0.941704	0.973022	0.94123	0.970776	0.953846
CSA012537.1	469	K	heat shock 70 kDa protein, mitochondrial-like	3	3	1	3.46014e-29	148.26	K(1)SQAFSTAADNQTQVGIK	4	1.799	2	1	1.82584e-19	139.81	K(1)SQAFSTAADNQTQVGIK	3	0.2206	1	1	9.72459e-07	82.765	K(1)SQAFSTAADNQTQVGIK	3	-0.094076	1	1.017	1.07	1.255	0.981	0.976	0.929	1.079	0.988	0.643	1.115	1.112	1.106	1.095	1.105	1.09	0.701	0.734	0.75	0.912108	0.96223	1.13472	0.89589	0.883258
CSA012537.1	577	K	heat shock 70 kDa protein, mitochondrial-like	3	3	1	0.00852261	91.867	K(1)TLIDLK	2	-0.78146	1	1	0.00949597	91.867	K(1)TLIDLK	2	-1.178	1	1	0.0111678	92.051	K(1)TLIDLK	2	0.73703	1	0.97	0.996	1.022	1.095	1.092	1.123	1.031	0.985	0.874	1.115	1.112	1.106	1.095	1.105	1.09	0.701	0.734	0.75	0.869955	0.895683	0.924051	1	0.988235
CSA012572.1	109	K	60S ribosomal protein L4	3	3	1	0.000659631	121.8	MFAPTK(1)IWR	2	2.0438	1	1	3.86434e-05	136.99	MFAPTK(1)IWR	2	-0.10217	2	1	0.0262247	66.19	MFAPTK(1)IWR	2	-0.91159	2	1.575	1.566	1.537	0.527	0.558	0.574	0.553	0.573	0.515	1.8	1.819	1.842	0.545	0.561	0.533	0.364	0.303	0.38	0.875	0.860913	0.834419	0.966972	0.994652
CSA012572.1	123	K	60S ribosomal protein L4	3	3	1	1.73529e-05	134.06	INVNQK(1)R	2	0.080094	2	1	5.67278e-05	148.33	INVNQK(1)R	2	-0.47207	2	1	7.35547e-07	158.36	INVNQK(1)R	2	-0.9139	2	1.531	1.743	1.592	0.603	0.46	0.522	0.546	0.364	0.468	1.8	1.819	1.842	0.545	0.561	0.533	0.364	0.303	0.38	0.850556	0.958219	0.864278	1.10642	0.819964
CSA012572.1	196	K	60S ribosomal protein L4	3	3	1	0.00393567	65.179	DSQAIRPGK(1)GK	3	0.86672	1	1	0.0200212	58.172	DSQAIRPGK(1)GK	3	-0.56582	1	1	0.00376592	75.819	DSQAIRPGK(1)GK	3	-0.09071	1	1.767	1.83	1.716	0.445	0.45	0.488	0.28	0.219	0.256	1.8	1.819	1.842	0.545	0.561	0.533	0.364	0.303	0.38	0.981667	1.00605	0.931596	0.816514	0.802139
CSA012572.1	337	K	60S ribosomal protein L4	3	3	1	8.59574e-10	152.04	LNPYAK(1)TAK	3	1.7875	4	1	6.92495e-08	147.74	LNPYAK(1)TAK	3	0.50335	4	1	2.58285e-06	147.74	LNPYAK(1)TAK	3	1.3146	4	1.574	1.52	1.518	0.561	0.62	0.608	0.513	0.583	0.511	1.8	1.819	1.842	0.545	0.561	0.533	0.364	0.303	0.38	0.874444	0.835624	0.824104	1.02936	1.10517
CSA012646.1	265	K	elongation factor G-2, mitochondrial	3	3	1	0.00304956	93.096	VAFINK(1)LDR	2	0.69407	1	1	0.000399501	128.87	VAFINK(1)LDR	2	-0.090715	1	1	0.00251742	92.538	VAFINK(1)LDR	2	-0.38759	1	1.13	1.177	1.082	1.05	1.096	1.116	0.776	0.653	0.757	1.235	1.181	1.136	0.911	0.887	0.925	0.796	0.816	0.861	0.91498	0.996613	0.952465	1.15258	1.23563
CSA012646.1	623	K	elongation factor G-2, mitochondrial	3	3	1	0.0102449	60.102	AEFDYLHK(1)K	3	-0.93356	1	1	0.0144662	55.461	AEFDYLHK(1)K	3	-0.95367	1	1	0.034572	40.994	AEFDYLHK(1)K	3	-0.96041	1	1.098	1.117	1.094	0.985	0.996	1.03	0.918	0.879	0.843	1.235	1.181	1.136	0.911	0.887	0.925	0.796	0.816	0.861	0.889069	0.945809	0.963028	1.08123	1.12289
CSA012667.1	105	K	linoleate 13S-lipoxygenase 2-1, chloroplastic-like	3	3	1	1.05217e-46	211.82	SYLPSQTPDGLK(1)R	2	0.23429	1	1	1.48821e-13	158.93	SYLPSQTPDGLK(1)R	2	-0.42836	1	1	1.55626e-11	169.4	SYLPSQTPDGLK(1)R	2	-0.67078	1	1.001	0.999	0.93	0.877	0.845	0.849	1.236	1.268	1.413	0.982	1.017	0.978	0.681	0.656	0.659	1.364	1.379	1.399	1.01935	0.982301	0.95092	1.28781	1.28811
CSA012667.1	171	K	linoleate 13S-lipoxygenase 2-1, chloroplastic-like	3	3	1	0.000141982	130.69	SK(1)TDPMSESR	2	0.9982	1	1	0.000480201	120.23	SK(1)TDPMSESR	2	2.4426	1	1	0.000872733	122.55	SK(1)TDPMSESR	2	1.3206	1	1.13	1.126	1.133	0.693	0.731	0.624	1.212	1.171	1.284	0.982	1.017	0.978	0.681	0.656	0.659	1.364	1.379	1.399	1.15071	1.10718	1.15849	1.01762	1.11433
CSA012667.1	313	K	linoleate 13S-lipoxygenase 2-1, chloroplastic-like	3	3	1	0.0350565	86.67	EWPLK(1)SK	2	-0.49957	1	1	0.0310545	83.948	EWPLK(1)SK	2	-0.39771	1	1	0.0271567	83.783	EWPLK(1)SK	2	-0.2996	1	0.981	1.026	0.995	0.818	0.855	0.826	1.348	1.206	1.309	0.982	1.017	0.978	0.681	0.656	0.659	1.364	1.379	1.399	0.998982	1.00885	1.01738	1.20117	1.30335
CSA012702.1	302	K	nicalin-1	3	2	1	2.86465e-08	98.105	NDPLIMALK(1)K	2	0.54369	2	1	0.00180343	107.09	NDPLIMALK(1)K	3	-2.2212	2	1	0.00179194	88.021	NDPLIMALK(1)K	2	-1.2217	2		1.088	0.871		1.088	1.036		0.825	1.295	1.193	1.178	1.16	1.103	1.08	1.067	0.736	0.668	0.699		0.923599	0.750862		1.00741
CSA012745.1	404	K	homeobox-DDT domain protein RLT2 isoform X2	3	2	1	6.82568e-09	125.16	EVEAHEK(1)R	3	-1.132	2	1	0.00377688	95.311	EVEAHEK(1)R	2	0.66935	2	1	2.57094e-07	134.77	EVEAHEK(1)R	3	0.3499	1	1.11	1.182		1.182	1.311		0.653	0.393		1.298	1.033		1.193	0.815		0.38			0.855162	1.14424		0.99078	1.60859
CSA012749.1	184	K	aldehyde dehydrogenase family 3 member F1	3	3	1	0.00051715	99.283	IVNK(1)HHFDR	2	-0.76218	3	1	0.00102584	93.442	IVNK(1)HHFDR	2	-0.10835	3	1	1.07972e-06	154.84	IVNK(1)HHFDR	2	-0.51194	2	0.893	0.899	0.886	1.386	1.429	1.46	0.823	0.77	0.723	0.949	0.936	0.958	1.331	1.282	1.344	0.743	0.812	0.719	0.940991	0.96047	0.924843	1.04132	1.11466
CSA012800.1	7	K	probable histone H2A variant 3	3	3	1	4.95163e-06	136.57	SGK(1)GAK(1)GLIMGK	2	-0.78525	9	1	3.90222e-07	133.13	SGK(1)GAK(1)GLIMGK	2	0.047097	12	1	6.4538e-06	123.86	SGK(1)GAK(1)GLIMGK	2	0.53925	9	0.938	0.939	0.952	1.307	1.286	1.284	0.834	0.863	0.811
CSA012800.1	13	K	probable histone H2A variant 3	3	2	1	0.000396129	68.044	GAK(1)GLIMGK(1)TPTNK	2	0.93703	2	1	3.90222e-07	102.5	GAK(1)GLIMGK(1)TPTNK	3	0.88106	3	1	0.00300362	59.709	GAK(1)GLIMGK(1)TPTNK	3	0.3139	2		0.757	0.884		1.17	1.068		1.329	1.228
CSA012836.1	155	K	60S ribosomal protein L3	3	3	1	2.88117e-08	147.24	DIQAQLEK(1)MK	2	0.7359	4	1	2.14402e-06	144.57	DIQAQLEK(1)MK	3	1.2902	2	1	0.000751846	125.82	DIQAQLEK(1)MK	2	0.053953	2	1.743	1.802	1.64	0.401	0.375	0.433	0.382	0.358	0.483	1.875	1.876	1.929	0.435	0.499	0.413	0.398	0.382	0.318	0.9296	0.960554	0.850181	0.921839	0.751503
CSA012836.1	293	K	60S ribosomal protein L3	3	3	1	8.37223e-30	173.98	LGK(1)SGQESHTAVTEFDR	3	1.4667	1	1	1.54878e-53	205.88	LGK(1)SGQESHTAVTEFDR	3	2.2536	1	1	1.47313e-28	183.6	LGK(1)SGQESHTAVTEFDR	3	0.61134	1	1.333	1.623	1.57	0.642	0.476	0.491	0.881	0.564	0.552	1.875	1.876	1.929	0.435	0.499	0.413	0.398	0.382	0.318	0.710933	0.865139	0.813893	1.47586	0.953908
CSA012836.1	383	K	60S ribosomal protein L3	3	3	1	5.46812e-10	155.26	FQTVEEK(1)QK	2	-1.2191	2	1	4.02514e-08	152.7	FQTVEEK(1)QK	2	-0.69327	1	1	0.000700903	122.69	FQTVEEK(1)QK	2	0.15317	2	1.765	1.909	1.709	0.42	0.378	0.425	0.315	0.159	0.352	1.875	1.876	1.929	0.435	0.499	0.413	0.398	0.382	0.318	0.941333	1.01759	0.885951	0.965517	0.757515
CSA012849.1	166	K	bifunctional protein FolD 4, chloroplastic	3	2	1	0.00359951	73.233	HGVQIEGK(1)R	2	-0.33229	2	1	0.00682694	63.816	HGVQIEGK(1)R	3	0.71317	1	1	0.000765488	110.53	HGVQIEGK(1)R	2	0.98895	2	0.935		0.908	0.976		0.96	1.245		1.317	1.019	0.987	0.96	0.972	0.959	0.935	1.029	1.076	1.065	0.917566		0.945833	1.00412
CSA012863.1	12	K	thioredoxin-like 3-2, chloroplastic	3	3	1	0.000714504	103.74	KCVYLK(1)PK	3	-0.074411	2	1	0.010087	97.068	CVYLK(1)PK	2	-0.04189	1	1	0.0041038	97.068	CVYLK(1)PK	2	0.15125	2	0.632	0.628	0.577	1.183	1.18	1.274	1.578	1.55	1.597
CSA012922.1	12	K	40S ribosomal protein S29	3	3	1	5.97021e-22	121.01	GHSNVWNSHPK(1)SYGPGSR	3	0.42171	2	1	1.73881e-10	101.53	GHSNVWNSHPK(1)SYGPGSR	3	1.1522	2	1	1.88279e-18	128.79	GHSNVWNSHPK(1)SYGPGSR	3	0.14646	2	1.187	1.14	1.235	0.948	0.964	0.937	0.791	0.873	0.673	1.114	1.455	1.612	0.888	0.945	0.9	0.963	0.43	0.262	1.06553	0.783505	0.766129	1.06757	1.02011
CSA012942.1	163	K	60S ribosomal protein L18-2-like	3	3	1	1.4829e-07	104.17	APGVPHSHTK(1)PYVR	4	-0.053568	1	1	0.00106712	65.043	APGVPHSHTK(1)PYVR	4	0.86512	1	1	1.3778e-05	84.297	APGVPHSHTK(1)PYVR	4	1.1803	1	1.178	1.299	1.147	0.777	0.852	0.924	1.017	0.715	0.871		1.454	1.866		0.667	0.427		0.689	0.42		0.893398	0.614684		1.27736
CSA012999.1	149	K	40S ribosomal protein S7	3	3	1	0.00742769	98.048	IDGSK(1)IIK	2	1.223	1	1	0.0199712	79.148	IDGSK(1)IIK	2	0.81305	1	1	0.00449595	98.048	IDGSK(1)IIK	2	1.5502	1	1.424	1.388	1.382	0.912	0.932	0.899	0.378	0.461	0.418	1.203	1.097	1.243	0.91	0.928	0.924	0.826	0.944	0.689	1.18371	1.26527	1.11183	1.0022	1.00431
CSA012999.1	158	K	40S ribosomal protein S7	3	3	1	0.0292065	79.059	IFLDPK(1)AR	2	0.98627	1	1	0.00392239	100.02	IFLDPK(1)AR	2	2.5665	1	1	0.0297797	70.856	IFLDPK(1)AR	2	1.0951	1	0.981	1.197	0.999	1.071	1.031	1.03	1.039	0.694	1.039	1.203	1.097	1.243	0.91	0.928	0.924	0.826	0.944	0.689	0.815461	1.09116	0.803701	1.17692	1.11099
CSA013034.1	203	K	replication factor C subunit 3	3	3	1	0.0023488	105.52	VLEFVGK(1)K	2	0.3198	1	1	0.00146892	105.52	VLEFVGK(1)K	2	1.7155	1	1	0.00428954	94.309	VLEFVGK(1)K	2	0.42395	1	1.166	1.265	1.182	0.898	0.94	0.956	0.891	0.675	0.757	1.176	1.315	1.357	0.904	0.814	0.861	0.917	0.722	0.669	0.991497	0.961977	0.871039	0.993363	1.15479
CSA013061.1	288	K	DNA-directed RNA polymerases IV and V subunit 2	3	3	1	0.0197411	57.859	VHIK(1)HAEK	4	2.6944	1	1	0.00235555	87.476	VHIK(1)HAEK	3	1.0444	1	1	0.00176775	89.698	VHIK(1)HAEK	3	0.5827	2	1.343	1.311	1.272	1.058	0.872	0.962	0.355	0.671	0.565	1.293	1.322	1.296	0.886	0.857	0.923	0.671	0.703	0.66	1.03867	0.991679	0.981481	1.19413	1.0175
CSA013084.1	329	K	topless-related protein 4-like	3	3	1	8.17723e-34	139.7	TPTNNAAVDYQTADSEHVLK(1)R	3	1.1746	1	1	5.53809e-44	161.47	TPTNNAAVDYQTADSEHVLK(1)R	3	1.3243	1	1	2.29198e-37	180.86	TPTNNAAVDYQTADSEHVLK(1)R	3	-0.071929	1	1.186	1.459	1.341	0.633	0.544	0.613	1.177	0.783	0.867		1.071	1.134		1.027	1.022		0.873	0.79		1.36228	1.18254		0.529698
CSA013100.1	206	K	phosphomethylpyrimidine synthase, chloroplastic-like isoform X3	3	3	1	0.00365277	93.178	AIIPSNK(1)K	2	0.29427	2	1	0.00361303	96.034	AIIPSNK(1)K	2	0.7275	2	1	0.00502315	91.867	AIIPSNK(1)K	2	0.27609	1	1.159	1.227	1.222	0.944	0.92	0.988	0.85	0.767	0.636	1.258	1.218	1.214	0.974	0.975	0.954	0.641	0.728	0.723	0.921304	1.00739	1.00659	0.969199	0.94359
CSA013120.1	494	K	protein FRIGIDA	3	3	1	0.00731747	86.898	EIAALDK(1)K	2	0.43014	1	1	0.018208	76.282	EIAALDK(1)K	2	0.36588	1	1	0.0013871	109.66	EIAALDK(1)K	2	-0.71844	1	0.906	0.964	1.047	1.032	0.97	1.112	1.232	1.186	0.838	1.088	1.145	1.1	1.093	1.079	1.135	0.769	0.695	0.72	0.832721	0.841921	0.951818	0.94419	0.898981
CSA013144.1	189	K	putative quinone-oxidoreductase homolog, chloroplastic	3	3	1	0.0128864	90.05	LK(1)TVIDSK	2	1.4498	1	1	0.00205466	106.4	LK(1)TVIDSK	2	0.54664	1	1	0.00790614	90.05	LK(1)TVIDSK	2	2.0301	1	0.702	0.704	0.655	1.268	1.333	1.32	1.339	1.236	1.378
CSA013179.1	411	K	uncharacterized protein LOC105177775	3	3	1	0.00512201	65.179	LLMK(1)HLDAPGR	3	-0.070193	1	1	0.000843072	80.014	LLMK(1)HLDAPGR	3	-1.3172	1	1	0.000800226	84.479	LLMK(1)HLDAPGR	3	-0.233	1	0.929	0.962	0.83	1.002	1.057	1.283	1.223	1.088	1.064	0.87	0.896	0.965	1.236	1.23	1.055	0.909	0.896	0.99	1.06782	1.07366	0.860104	0.81068	0.85935
CSA013179.1	423	K	uncharacterized protein LOC105177775	3	3	1	0.00155719	104.21	WLQEK(1)HR	3	1.4745	1	1	0.00229867	95.741	WLQEK(1)HR	3	0.81208	1	1	0.00464082	89.752	WLQEK(1)HR	3	0.55054	1	0.887	1.079	1.031	1.461	1.081	1.176	0.745	0.848	0.788	0.87	0.896	0.965	1.236	1.23	1.055	0.909	0.896	0.99	1.01954	1.20424	1.06839	1.18204	0.878862
CSA013184.1	131	K	Chaperone protein	3	3	1	0.0126993	54.198	ALLEQK(1)DGLAR	3	-3.313	1	1	0.0120273	70.829	ALLEQK(1)DGLAR	2	-2.5771	1	1	0.000107327	132.14	ALLEQK(1)DGLAR	3	-3.5734	2	1.232	0.71	0.783	0.893	1.19	1.191	0.771	1.391	1.278	0.961	0.929	0.951	1.084	1.063	1.062	0.933	1.021	0.981	1.282	0.764263	0.823344	0.823801	1.11947
CSA013255.1	67	K	heterogeneous nuclear ribonucleoprotein 1-like	3	3	1	0.000230662	92.856	VLQDK(1)HLIDGR	3	0.52383	1	1	0.000867309	112.08	VLQDK(1)HLIDGR	2	1.9498	2	1	0.000109538	92.856	VLQDK(1)HLIDGR	2	2.2098	2	0.996	0.908	0.936	1.008	0.896	1.008	1.088	1.375	1.198	1.016	1.046	0.992	0.948	0.959	0.98	1.051	0.969	1.02	0.980315	0.868069	0.943548	1.06329	0.934307
CSA013271.1	157	K	peroxisomal nicotinamide adenine dinucleotide carrier isoform X1	3	2	1	0.00767421	61.48	NK(1)AEAIAIAHR	3	0.40008	1	1	0.0207943	49.28	NK(1)AEAIAIAHR	3	2.2867	1	1	0.000938302	83.226	NK(1)AEAIAIAHR	3	3.0674	1	1.136		1.07	0.881		0.906	0.972		1.051		0.594			1.138			1.413
CSA013301.1	96	K	UDP-glycosyltransferase 74E2	3	1	1	0.000939265	99.283	AESPAAYLK(1)K	2	1.0899	1	1	0.0174642	43.297	AESPAAYLK(1)K	2	1.5271	1	1	0.00110461	94.465	AESPAAYLK(1)K	2	3.0807	3			0.761			1.023			1.538	0.948		1.01	1.078		0.996	0.988		0.99			0.753465
CSA013361.1	115	K	probable aldo-keto reductase 2	3	3	1	1.59855e-15	166.34	AACEASLK(1)R	2	0.89444	2	1	4.78004e-08	147.75	AACEASLK(1)R	2	0.39767	3	1	1.43044e-06	150.35	AACEASLK(1)R	2	-0.17814	3	1.441	1.32	1.339	0.71	0.837	0.797	0.59	0.694	0.637	1.219	1.196		0.89	0.871		0.816	0.869		1.18212	1.10368		0.797753	0.960964
CSA013381.1	325	K	alpha-galactosidase 1-like	3	3	1	0.00418753	104.45	LGVQAK(1)K	2	0.27299	1	1	0.0035164	104.45	LGVQAK(1)K	2	0.06307	1	1	0.00508105	102.71	LGVQAK(1)K	2	0.99008	1	0.971	0.936	0.861	1.169	1.247	1.407	0.938	0.915	0.842	0.752	0.759	0.729	1.367	1.327	1.407	0.958	0.961	0.941	1.29122	1.2332	1.18107	0.855157	0.939714
CSA013417.1	96	K	probable protein disulfide-isomerase A6	3	2	1	0.00818245	80.462	FFPK(1)SNK	3	0.24181	1	1	0.0289406	58.194	FFPK(1)SNK	3	0.83554	1	1	0.00401973	92.467	FFPK(1)SNK	3	0.44195	1	1.025		1.022	0.93		1.021	1.127		1.002	1.303	1.245	1.232	1.035	1.011	1.017	0.555	0.633	0.622	0.786646		0.829545	0.898551
CSA013417.1	156	K	probable protein disulfide-isomerase A6	3	3	1	3.10709e-05	127.71	EFVSAGNDEK(1)K	2	0.91497	1	1	1.60535e-07	145.29	EFVSAGNDEK(1)K	2	0.1365	1	1	4.54388e-10	170.66	EFVSAGNDEK(1)K	2	0.3147	1	1.413	1.409	1.388	1.016	0.985	0.952	0.27	0.36	0.339	1.303	1.245	1.232	1.035	1.011	1.017	0.555	0.633	0.622	1.08442	1.13173	1.12662	0.981643	0.974283
CSA013417.1	222	K	probable protein disulfide-isomerase A6	3	3	1	0.0023488	105.52	ADEFALK(1)K	3	0.76786	2	1	0.00146892	105.52	ADEFALK(1)K	2	-0.069236	1	1	0.00195195	103.55	ADEFALK(1)K	2	0.51613	1	1.27	1.188	1.262	1.041	1.035	1.011	0.518	0.705	0.521	1.303	1.245	1.232	1.035	1.011	1.017	0.555	0.633	0.622	0.974674	0.954217	1.02435	1.0058	1.02374
CSA013419.1	24	K	uncharacterized protein LOC109136237	3	3	1	0.00742769	98.048	AK(1)SVLIGK	3	-0.7368	4	1	0.00194162	107.79	AK(1)SVLIGK	2	-0.0027416	2	1	0.00221527	107.79	AK(1)SVLIGK	3	-0.68235	4	1.211	1.271	1.192	0.99	1.043	0.97	0.693	0.543	0.718
CSA013466.1	143	K	triose phosphate/phosphate translocator, chloroplastic isoform X2	3	3	1	0.000112593	92.295	LMK(1)HGFSDAIAK	3	-0.26733	3	1	7.64993e-07	119.39	LMK(1)HGFSDAIAK	3	-0.93686	1	1	1.58465e-05	105.65	LMK(1)HGFSDAIAK	3	0.85525	3	0.632	0.502	0.544	1.113	1.257	1.15	1.663	1.691	1.824	0.528	0.483	0.524	1.002	1.006	0.886	1.651	1.756	1.781	1.19697	1.03934	1.03817	1.11078	1.2495
CSA013466.1	195	K	triose phosphate/phosphate translocator, chloroplastic isoform X2	3	3	1	2.32152e-08	107.17	VAPLTHAVGNVLK(1)R	3	-0.98662	1	1	5.08484e-11	131.32	VAPLTHAVGNVLK(1)R	3	-1.0353	1	1	2.49282e-09	133.15	VAPLTHAVGNVLK(1)R	3	-0.80325	1	0.972	1.038	1.039	1.074	1.023	0.904	1.054	0.992	1.119	0.528	0.483	0.524	1.002	1.006	0.886	1.651	1.756	1.781	1.84091	2.14907	1.98282	1.07186	1.0169
CSA013503.1	61	K	histone H1	3	3	1	0.00326692	97.734	QAIAK(1)YIEK	2	0.64438	1	1	0.00313432	108.7	QAIAK(1)YIEK	2	-1.2434	1	1	0.00109431	108.7	QAIAK(1)YIEK	3	-1.0461	2	1.173	1.199	1.127	1.212	1.147	1.159	0.495	0.551	0.611	1.081	1.066	1.071	1.058	1.085	1.084	0.832	0.856	0.763	1.08511	1.12477	1.05229	1.14556	1.05714
CSA013503.1	183	K	histone H1	3	3	1	0.00357462	107.11	SAK(1)TELGNR	2	-0.50372	2	1	0.0014736	82.494	SAK(1)TELGNR	3	0.81797	2	1	0.00108382	111.27	SAK(1)TELGNR	2	-0.6915	2	0.777	0.893	0.759	1.316	1.176	1.263	1.134	1.074	1.236	1.081	1.066	1.071	1.058	1.085	1.084	0.832	0.856	0.763	0.718779	0.837711	0.708683	1.24386	1.08387
CSA013503.1	210	K	histone H1	3	3	1	4.83364e-20	169.79	SLSLLMGQGGLK(1)R	2	-0.10048	2	1	3.34916e-32	187.74	SLSLLMGQGGLK(1)R	2	-0.55388	2	1	3.82325e-11	161.87	SLSLLMGQGGLK(1)R	3	-1.2685	3	0.644	0.717	0.659	1.263	1.261	1.291	1.457	1.297	1.406	1.081	1.066	1.071	1.058	1.085	1.084	0.832	0.856	0.763	0.595745	0.672608	0.615313	1.19376	1.16221
CSA013503.1	270	K	histone H1	3	3	1	0.00906918	81.625	K(1)VNVGVLPGK(1)R	2	-0.13299	1	1	0.0322922	59.198	K(1)VNVGVLPGK(1)R	2	-1.0445	1	1	0.0065035	73.887	K(1)VNVGVLPGK(1)R	2	0.85261	2	0.792	0.752	0.763	1.212	1.139	1.135	1.233	1.375	1.393	1.081	1.066	1.071	1.058	1.085	1.084	0.832	0.856	0.763	0.732655	0.705441	0.712418	1.14556	1.04977
CSA013503.1	279	K	histone H1	3	3	1	2.78857e-12	109.16	VNVGVLPGK(1)R	2	-0.49693	12	1	9.94596e-28	145.46	VNVGVLPGK(1)R	3	-1.4896	6	1	7.21533e-27	164.65	VNVGVLPGK(1)R	2	-2.238	5	0.715	0.656	0.721	1.131	1.208	1.152	1.481	1.469	1.456	1.081	1.066	1.071	1.058	1.085	1.084	0.832	0.856	0.763	0.661425	0.615385	0.673203	1.069	1.11336
CSA013503.1	291	K	histone H1	3	3	1	0.00013156	107.34	RPIADGVK(1)MPR	2	-0.16482	6	1	5.80925e-09	152.55	RPIADGVK(1)MPR	2	0.21929	8	1	0.000125523	134.49	RPIADGVK(1)MPR	2	-0.033031	7	0.71	0.649	0.686	1.231	1.149	1.276	1.369	1.55	1.37	1.081	1.066	1.071	1.058	1.085	1.084	0.832	0.856	0.763	0.656799	0.608818	0.640523	1.16352	1.05899
CSA013503.1	330	K	histone H1	3	3	1	0.0171493	54.198	NK(1)VEHFQSR	3	0.48008	1	1	5.33639e-08	150.46	NK(1)VEHFQSR	2	0.58921	2	1	0.000241663	131.83	NK(1)VEHFQSR	2	0.37837	2	1.034	1.158	1.052	1.277	1.145	1.179	0.685	0.63	0.74	1.081	1.066	1.071	1.058	1.085	1.084	0.832	0.856	0.763	0.956522	1.0863	0.98226	1.20699	1.0553
CSA013547.1	316	K	heat shock cognate protein 80	3	3	1	0.00154268	111.82	AVLFVPK(1)R	2	-0.62691	2	1	0.000814185	117.16	AVLFVPK(1)R	2	0.54835	2	1	0.00126302	111.01	AVLFVPK(1)R	2	0.23187	2	1.26	1.473	1.453	0.806	0.783	0.791	0.82	0.481	0.411	1.449	1.484	1.503	0.841	0.823	0.828	0.543	0.522	0.535	0.869565	0.992588	0.966733	0.958383	0.951397
CSA013547.1	326	K	heat shock cognate protein 80	3	3	1	2.07787e-07	145.91	RAPFDLFDTK(1)K	3	-0.93056	3	1	1.06513e-06	138.45	RAPFDLFDTK(1)K	3	1.8742	3	1	0.000216525	110.44	RAPFDLFDTK(1)K	3	-0.097167	4	1.609	1.714	1.447	0.61	0.644	0.816	0.386	0.205	0.392	1.449	1.484	1.503	0.841	0.823	0.828	0.543	0.522	0.535	1.11042	1.15499	0.962741	0.725327	0.782503
CSA013600.1	343	K	alanine--glyoxylate aminotransferase 2 homolog 1, mitochondrial	3	3	1	1.58802e-05	83.252	LSNLQQK(1)HEIIGDVR	3	0.50755	1	1	9.48355e-06	82.663	LSNLQQK(1)HEIIGDVR	3	0.84118	1	1	1.05521e-08	94.366	LSNLQQK(1)HEIIGDVR	3	0.6969	1	0.963	0.972	1.109	1.078	0.983	1.023	1.065	1.157	0.823	1.205	1.175	1.16	0.869	0.863	0.844	0.884	0.93	0.906	0.79917	0.827234	0.956034	1.24051	1.13905
CSA013701.1	210	K	glutathione S-transferase T1	3	3	1	0.00594779	97.068	ILGPHK(1)K	2	0.41943	3	1	0.00186949	97.068	ILGPHK(1)K	2	1.2589	3	1	0.00240627	97.071	ILGPHK(1)K	2	1.1575	3	1.015	0.956	0.948	0.897	0.851	0.883	1.185	1.34	1.335	0.934	0.91	0.934	0.975	0.947	0.904	1.126	1.174	1.183	1.08672	1.05055	1.01499	0.92	0.898627
CSA013740.1	25	K	30S ribosomal protein S2 (chloroplast)	3	3	1	0.0235645	63.397	MAPYISAK(1)R	2	0.28713	1	1	0.00376101	79.427	MAPYISAK(1)R	2	0.13273	1	1	0.000788471	102.55	MAPYISAK(1)R	2	1.2798	1	0.79	0.868	0.826	1.545	1.303	1.337	0.83	0.973	1.005	0.859	0.885	0.981	1.458	1.187	1.173	0.702	0.958	0.84	0.919674	0.980791	0.841998	1.05967	1.09773
CSA013744.1	128	K	serine hydroxymethyltransferase 3, chloroplastic-like	3	3	1	0.00138643	98.044	YSEGLPGK(1)R	2	0.68828	2	1	0.0012995	115.82	YSEGLPGK(1)R	3	-0.063549	4	1	0.000776	106.88	YSEGLPGK(1)R	2	0.72842	2	0.769	0.854	0.896	1.028	1.005	0.937	1.503	1.345	1.372	0.957	0.956	0.98	1.028	1.103	1.074	0.94	0.974	0.913	0.803553	0.893305	0.914286	1	0.911151
CSA013744.1	176	K	serine hydroxymethyltransferase 3, chloroplastic-like	3	2	1	0.00289527	71.221	ALAAFHLDGK(1)K	3	0.97565	1	1	2.33014e-06	134.98	ALAAFHLDGK(1)K	3	2.8369	4	1	0.00163028	73.499	ALAAFHLDGK(1)K	3	-1.0963	2		1.05	0.968		1.119	1.163		0.856	0.933	0.957	0.956	0.98	1.028	1.103	1.074	0.94	0.974	0.913		1.09833	0.987755		1.01451
CSA013747.1	387	K	TBCC domain-containing protein 1	3	3	1	0.00436785	70.332	VHVIVAAK(1)R	3	-0.78743	2	1	0.00100513	79.596	VHVIVAAK(1)R	3	-0.23215	2	1	0.000455315	94.806	VHVIVAAK(1)R	3	-1.0493	3	1.094	1.039	1.102	1.074	1.01	0.968	0.817	1.004	0.907	1.065	1.09	1.114	0.978	0.994	0.985	0.924	0.838	0.831	1.02723	0.953211	0.989228	1.09816	1.0161
CSA013803.1	52	K	40S ribosomal protein S12-like isoform X1	3	3	1	0.00147504	81.09	K(1)SLAHGGLSR	3	-1.0251	4	1	0.000236676	114.71	K(1)SLAHGGLSR	3	-0.78485	3	1	0.00158461	73.36	K(1)SLAHGGLSR	3	-0.92406	3	1.041	1.149	0.999	1.05	1.076	0.984	0.95	0.728	1.1	1.361	1.338	1.24	0.919	0.934	0.957	0.588	0.603	0.702	0.764879	0.858744	0.805645	1.14255	1.15203
CSA013811.1	54	K	heat shock cognate protein 80	3	3	1	2.00071e-05	131.5	FESLTDK(1)SK	3	-0.097379	2	1	0.000601706	126.71	FESLTDK(1)SK	3	-1.0619	3	1	9.96323e-05	139.86	FESLTDK(1)SK	2	-1.9037	2	1.624	1.598	1.538	0.664	0.724	0.774	0.294	0.321	0.258	1.533	1.472	1.505	0.915	0.923	0.915	0.349	0.397	0.393	1.05936	1.0856	1.02193	0.725683	0.784399
CSA013811.1	196	K	heat shock cognate protein 80	3	0	0.999997	0.00512338	76.064	LKDLVK(1)K	3	-0.37521	3	0.999997	0.0102299	76.064	LKDLVK(1)K	3	-0.77718	2	0.999997	0.0166178	76.064	LKDLVK(1)K	3	-0.67627	2										1.533	1.472	1.505	0.915	0.923	0.915	0.349	0.397	0.393
CSA013811.1	263	K	heat shock cognate protein 80	3	3	1	1.54985e-08	132.79	EVSHEWSLVNK(1)QK	3	1.8312	1	1	3.09869e-07	119.25	EVSHEWSLVNK(1)QK	3	0.74366	1	1	1.24477e-06	123.28	EVSHEWSLVNK(1)QK	3	0.58184	2	1.126	1.194	1.174	0.977	0.974	0.933	0.873	0.766	0.805	1.533	1.472	1.505	0.915	0.923	0.915	0.349	0.397	0.393	0.734508	0.811141	0.780066	1.06776	1.05525
CSA013811.1	271	K	heat shock cognate protein 80	3	3	1	0.0204978	81.972	K(1)PEEITK	2	0.85711	1	0.999985	9.42486e-17	148.52	K(1)PEEITKEEYSAFYK	3	-0.27987	1	1	5.57788e-14	142.39	K(1)PEEITK	2	0.087869	2	1.434	1.567	1.453	0.803	0.862	0.865	0.489	0.217	0.316	1.533	1.472	1.505	0.915	0.923	0.915	0.349	0.397	0.393	0.935421	1.06454	0.965449	0.877596	0.933911
CSA013811.1	316	K	heat shock cognate protein 80	3	3	1	0.00248739	104.21	AILFVPK(1)R	2	-1.03	1	1	0.00172385	104.37	AILFVPK(1)R	2	1.1752	1	1	0.000996963	113.89	AILFVPK(1)R	2	-1.0362	1	1.525	1.494	1.509	0.753	0.821	0.833	0.375	0.397	0.238	1.533	1.472	1.505	0.915	0.923	0.915	0.349	0.397	0.393	0.994781	1.01495	1.00266	0.822951	0.889491
CSA013811.1	378	K	heat shock cognate protein 80	3	3	1	4.59472e-06	134.13	EMLQQNK(1)ILK	3	-1.0232	6	1	2.71938e-13	170.52	EMLQQNK(1)ILK	3	-2.1479	7	1	4.41477e-06	152.7	EMLQQNK(1)ILK	3	-1.3805	5	1.343	1.474	1.517	0.81	0.798	0.766	0.658	0.461	0.312	1.533	1.472	1.505	0.915	0.923	0.915	0.349	0.397	0.393	0.87606	1.00136	1.00797	0.885246	0.864572
CSA013811.1	414	K	heat shock cognate protein 80	3	3	1	0.00195381	79.148	FYEAFSK(1)NLK	3	-2.2691	1	1	0.00125034	114.86	FYEAFSK(1)NLK	2	0.71935	2	1	0.000367961	135.99	FYEAFSK(1)NLK	2	0.14391	1	1.553	1.347	1.516	0.848	1.163	0.846	0.204	0.266	0.209	1.533	1.472	1.505	0.915	0.923	0.915	0.349	0.397	0.393	1.01305	0.915082	1.00731	0.926776	1.26002
CSA013811.1	440	K	heat shock cognate protein 80	3	3	1	8.55789e-11	133.48	YHSTK(1)SGDEMTSLK	3	0.17267	1	1	7.27367e-17	151.56	YHSTK(1)SGDEMTSLK	3	1.4329	3	1	8.73053e-10	141	YHSTK(1)SGDEMTSLK	3	1.0473	3	1.243	1.247	1.181	1.139	1.063	1.038	0.451	0.565	0.655	1.533	1.472	1.505	0.915	0.923	0.915	0.349	0.397	0.393	0.810828	0.847147	0.784718	1.24481	1.15168
CSA013811.1	481	K	heat shock cognate protein 80	3	3	1	4.05225e-12	157.09	AVENSPFLEK(1)LK	2	-1.6729	2	1	6.96024e-17	165.64	AVENSPFLEK(1)LK	2	4.4035	2	1	4.16408e-07	150.22	AVENSPFLEK(1)LK	2	1.1461	2	1.501	1.544	1.602	0.799	0.771	0.746	0.362	0.364	0.162	1.533	1.472	1.505	0.915	0.923	0.915	0.349	0.397	0.393	0.979126	1.04891	1.06445	0.873224	0.83532
CSA013811.1	538	K	heat shock cognate protein 80	3	3	1	0.00588407	104.22	EK(1)FEGLCK	2	-0.9285	1	1	0.00208923	105.98	EK(1)FEGLCK	2	-0.822	1	1	3.0968e-07	146.96	EK(1)FEGLCK	2	-1.1698	2	1.524	1.517	1.572	0.799	0.794	0.704	0.32	0.386	0.275	1.533	1.472	1.505	0.915	0.923	0.915	0.349	0.397	0.393	0.994129	1.03057	1.04452	0.873224	0.860238
CSA013811.1	602	K	heat shock cognate protein 80	3	3	1	1.52789e-12	157.5	DSSMAGYMSSK(1)K	2	-0.41387	3	1	6.82146e-12	147.73	DSSMAGYMSSK(1)K	3	0.83662	4	1	1.46595e-07	155.08	DSSMAGYMSSK(1)K	3	-1.1464	6	1.388	1.413	1.412	0.843	0.819	0.811	0.529	0.549	0.468	1.533	1.472	1.505	0.915	0.923	0.915	0.349	0.397	0.393	0.905414	0.959918	0.938206	0.921311	0.887324
CSA013844.1	418	K	glutathione reductase, chloroplastic	3	3	1	0.0202663	51.762	NEPTK(1)PDHR	3	0.16216	1	1	0.00272595	74.533	NEPTK(1)PDHR	3	1.5889	1	1	0.00972496	61.765	NEPTK(1)PDHR	3	0.8476	1	0.629	0.715	0.667	0.994	0.99	0.924	1.813	1.614	1.859	0.675	0.671	0.624	1.17	1.185	1.214	1.232	1.226	1.273	0.931852	1.06557	1.06891	0.849573	0.835443
CSA013852.1	426	K	UDP-sulfoquinovose synthase, chloroplastic	3	3	1	1.39457e-08	114.31	VEAEEHYYNAK(1)HTK	3	0.39001	3	1	1.14939e-13	142.45	VEAEEHYYNAK(1)HTK	4	-0.11306	2	1	3.53312e-07	101.75	VEAEEHYYNAK(1)HTK	3	1.2313	2	0.876	0.906	0.854	1.492	1.465	1.433	0.728	0.715	0.824	0.907	0.891	0.893	1.331	1.306	1.275	0.805	0.748	0.836	0.965821	1.01684	0.956327	1.12096	1.12175
CSA013997.1	28	K	galactinol synthase 1	3	3	1	1.24195e-08	144.51	LSTTLNPGYSK(1)R	2	-1.0314	2	1	7.09494e-09	140.33	LSTTLNPGYSK(1)R	2	-1.18	2	1	6.25192e-11	170.22	LSTTLNPGYSK(1)R	2	-1.3959	2	0.45	0.455	0.309	0.765	0.804	0.816	2.44	2.303	2.735	0.384	0.309	0.409	0.618	0.607	0.585	2.308	2.398	2.237	1.17188	1.47249	0.755501	1.23786	1.32455
CSA014024.1	321	K	probable ubiquitin conjugation factor E4	3	3	1	0.00362605	105.4	CLLK(1)NAETR	2	-1.0747	1	1	0.00376474	101.38	CLLK(1)NAETR	2	-0.65307	1	1	0.00329484	87.568	CLLK(1)NAETR	2	-0.80318	1	1.236	1.282	1.204	0.94	0.943	0.98	0.707	0.641	0.682	1.051	0.991	1.074	1.07	1.078	1.054	0.847	0.89	0.902	1.17602	1.29364	1.12104	0.878505	0.874768
CSA014050.1	686	K	protein transport protein Sec24-like At4g32640 isoform X1	3	2	1	0.00747558	85.522	LLQPADK(1)TLK	2	0.58014	1	1	0.00323638	99.5	LLQPADK(1)TLK	2	-0.13872	1	1	0.000592574	103.43	LLQPADK(1)TLK	2	0.44056	1		0.881	1.096		0.885	0.985		1.436	0.898	1.148	1.203	1.206	1.016	1.005	0.937	0.791	0.739	0.79		0.732336	0.908789		0.880597
CSA014168.1	385	K	probable methylenetetrahydrofolate reductase	3	2	1	0.000204455	97.463	NVEDIHEK(1)FWK	3	-0.031564	1	1	0.0188346	49.934	NVEDIHEK(1)FWK	3	1.0205	1	1	0.00726643	60.157	NVEDIHEK(1)FWK	3	0.001241	1	1.211		1.119	0.887		0.906	0.816		0.952	1.358	1.202	1.382	0.82	0.877	0.825	0.732	0.796	0.686	0.891753		0.809696	1.08171
CSA014302.1	313	K	magnesium-chelatase subunit ChlI, chloroplastic-like isoform X3	3	3	1	0.00293373	110.08	FDQNPK(1)EFR	2	0.85097	1	1	0.0100908	76.068	FDQNPK(1)EFR	2	-0.44376	1	1	0.000984673	117.52	FDQNPK(1)EFR	2	-0.21167	1	0.796	0.852	0.846	1.16	1.155	1.265	1.288	1.175	1.054	0.841	0.808	0.76	1.254	1.254	1.298	0.897	0.987	0.888	0.946492	1.05446	1.11316	0.92504	0.921053
CSA014373.1	80	K	60S ribosomal protein L19-1-like	3	3	1	0.00852819	78.178	HSGYGK(1)R	3	1.547	1	1	0.00157993	99.375	HSGYGK(1)R	3	1.4209	1	1	0.00142995	104.21	HSGYGK(1)R	3	1.7078	2	1.222	1.622	1.687	0.723	0.437	0.402	0.997	0.612	0.427	1.478	1.464	1.503	0.696	0.672	0.705	0.667	0.692	0.623	0.826793	1.10792	1.12242	1.03879	0.650298
CSA014373.1	162	K	60S ribosomal protein L19-1-like	3	3	1	5.55271e-13	160.88	TLSDQFEAK(1)R	2	1.0366	1	1	9.71902e-07	145.09	TLSDQFEAK(1)R	2	1.0513	1	1	0.000338774	133.05	TLSDQFEAK(1)R	2	0.19549	1	1.497	1.528	1.709	0.56	0.498	0.411	0.663	0.711	0.367	1.478	1.464	1.503	0.696	0.672	0.705	0.667	0.692	0.623	1.01286	1.04372	1.13706	0.804598	0.741071
CSA014385.1	107	K	glucose-1-phosphate adenylyltransferase large subunit 3, chloroplastic/amyloplastic	3	3	1	1.17175e-05	138.37	LFPLTK(1)R	2	1.931	3	1	0.00323923	133.81	LFPLTK(1)R	2	1.3222	2	1	0.000397405	138.37	LFPLTK(1)R	2	1.592	2	0.54	0.583	0.302	0.947	0.984	0.968	2.044	1.862	2.555	0.519	0.498	0.496	0.951	0.953	0.947	1.687	1.74	1.77	1.04046	1.17068	0.608871	0.995794	1.03253
CSA014385.1	488	K	glucose-1-phosphate adenylyltransferase large subunit 3, chloroplastic/amyloplastic	3	3	1	0.0194898	85.355	IK(1)NCIIDK	2	1.2918	1	1	0.00512859	96.342	IK(1)NCIIDK	2	-0.08237	1	1	0.0109014	85.355	IK(1)NCIIDK	2	0.30429	1	0.503	0.427	0.426	1.436	1.549	1.52	1.519	1.488	1.594	0.519	0.498	0.496	0.951	0.953	0.947	1.687	1.74	1.77	0.969171	0.85743	0.858871	1.50999	1.62539
CSA014398.1	468	K	uncharacterized protein LOC100852852	3	3	1	0.000237517	111.63	SDKEQYCNK(1)K	3	0.59623	1	1	0.00138409	103.44	SDKEQYCNK(1)K	3	-0.24463	1	0.999999	0.00257769	83.045	SDKEQYCNK(1)K	3	-0.20608	1	1.257	1.291	1.197	1.067	1.087	1.081	0.511	0.458	0.565	0.975	0.973	0.985	1.097	1.068	1.112	0.93	1.004	0.9	1.28923	1.32682	1.21523	0.972653	1.01779
CSA014503.1	40	K	4-hydroxy-tetrahydrodipicolinate synthase, chloroplastic isoform X1	3	3	1	9.14783e-10	148.28	TSTEDIK(1)SLR	2	-1.3869	1	1	0.00290776	105.2	TSTEDIK(1)SLR	2	-1.2498	1	1	0.000742983	107.09	TSTEDIK(1)SLR	2	-1.1297	1	1.045	1.072	1.012	1.157	1.165	1.24	0.81	0.766	0.745			0.87			1.113			1.058			1.16322
CSA014526.1	128	K	uncharacterized protein LOC107432052	3	3	1	2.90271e-05	101.2	VSGVDLIEQITK(1)R	2	1.032	2	1	0.00573784	57.434	VSGVDLIEQITK(1)R	3	1.1773	1	1	0.000237705	85.909	VSGVDLIEQITK(1)R	2	-0.24703	2	1.257	1.173	1.134	0.957	1.026	1.105	0.642	0.742	0.667
CSA014531.1	44	K	cinnamoyl-CoA reductase 1-like	3	3	1	0.010645	57.175	NPDDPK(1)NSHLR	3	-0.59277	1	1	0.00220504	72.29	NPDDPK(1)NSHLR	3	-0.42778	1	1	0.0109854	55.776	NPDDPK(1)NSHLR	3	0.028236	1	1.315	1.377	1.174	0.843	0.629	0.876	0.672	0.835	0.874	1.271	1.228	1.144	0.819	0.861	0.873	0.812	0.877	0.914	1.03462	1.12134	1.02622	1.0293	0.730546
CSA014547.1	321	K	enolase 1, chloroplastic	3	3	1	0.0115628	89.355	YDLNFK(1)K	2	-0.10938	1	1	0.0132894	89.355	YDLNFK(1)K	2	0.59703	1	1	0.00531375	101.54	YDLNFK(1)K	2	1.0041	1	1.234	1.403	1.291	1.01	0.897	0.906	0.622	0.474	0.596	1.346	1.32	1.321	0.975	0.993	0.985	0.578	0.591	0.56	0.91679	1.06288	0.97729	1.0359	0.903323
CSA014627.1	154	K	membrane steroid-binding protein 2-like	3	3	1	0.0263837	89.698	FMEK(1)YVK	2	3.0473	1	1	0.0393219	80.165	FMEK(1)YVK	2	-0.75959	1	1	0.00754424	101.54	FMEK(1)YVK	2	0.53395	1	0.834	0.82	0.789	1.302	1.201	1.483	1.044	1.179	0.892	0.959	0.978	1.018	1.291	1.232	1.226	0.67	0.78	0.731	0.869656	0.838446	0.775049	1.00852	0.974838
CSA014653.1	37	K	chlorophyll a-b binding protein CP29.1, chloroplastic	3	3	1	0.0131673	88.029	FGFGAK(1)K	2	-1.5757	1	1	0.00696871	97.068	FGFGAK(1)K	2	-0.65012	1	1	0.0143877	86.866	FGFGAK(1)K	2	-0.34575	1	1.014	1.064	1.003	0.875	0.834	0.835	1.216	1.164	1.281	0.846	0.801	0.853	0.739	0.764	0.791	1.503	1.513	1.497	1.19858	1.32834	1.17585	1.18403	1.09162
CSA014653.1	210	K	chlorophyll a-b binding protein CP29.1, chloroplastic	3	3	1	0.000751293	115.42	NSELDPEK(1)R	2	-1.6311	1	1	0.00318313	86.276	NSELDPEK(1)R	2	-1.1639	1	1	0.00324335	84.507	NSELDPEK(1)R	2	-1.8055	1	0.92	0.979	0.909	0.823	0.915	0.857	1.461	1.222	1.446	0.846	0.801	0.853	0.739	0.764	0.791	1.503	1.513	1.497	1.08747	1.22222	1.06565	1.11367	1.19764
CSA014673.1	194	K	tripeptidyl-peptidase 2-like, partial	3	3	1	0.000375822	107.79	AHEYIQK(1)LHK	4	1.2227	1	1	0.000556246	105.2	AHEYIQK(1)LHK	4	1.7951	1	1	0.00775855	60.398	AHEYIQK(1)LHK	4	-0.17501	1	1.099	1.072	1.032	1.119	1.089	1.196	0.751	0.852	0.76	1.091	1.076	1.07	1.14	1.154	1.162	0.723	0.748	0.713	1.00733	0.996283	0.964486	0.981579	0.943674
CSA014724.1	258	K	probable galactinol--sucrose galactosyltransferase 6 isoform X1	3	3	1	0.0161305	87.639	AVK(1)SHLK	2	-0.41848	2	1	0.0109715	87.639	AVK(1)SHLK	3	-0.64703	2	1	0.00335947	101.43	AVK(1)SHLK	2	-1.1953	2	1.092	1.155	1.203	0.968	0.958	0.808	0.949	0.852	0.904	1.174	1.18	1.123	0.744	0.725	0.766	1.035	1.034	1.056	0.930153	0.978814	1.07124	1.30108	1.32138
CSA014724.1	262	K	probable galactinol--sucrose galactosyltransferase 6 isoform X1	3	3	1	0.00207947	98.629	SHLK(1)TFR	3	1.9601	2	1	0.00384341	89.752	SHLK(1)TFR	3	1.6435	2	1	0.00509795	87.754	SHLK(1)TFR	3	1.6988	2	1.18	1.135	1.123	0.884	0.925	0.855	0.881	0.929	1.01	1.174	1.18	1.123	0.744	0.725	0.766	1.035	1.034	1.056	1.00511	0.961864	1	1.18817	1.27586
CSA014730.1	157	K	inactive protein RESTRICTED TEV MOVEMENT 2-like	3	3	1	2.81998e-08	107.9	IQEDTTDRFTSDPK(1)R	3	-0.89833	3	1	3.59626e-07	95.662	IQEDTTDRFTSDPK(1)R	3	0.3445	1	1	7.75366e-10	101.9	IQEDTTDRFTSDPK(1)R	3	0.4753	2	0.485	0.549	0.787	0.716	0.745	0.787	2.433	2.199	1.786	0.761	0.905	0.813	1.228	1.238	1.23	1.003	0.902	1	0.637319	0.60663	0.96802	0.583062	0.601777
CSA014730.1	216	K	inactive protein RESTRICTED TEV MOVEMENT 2-like	3	3	1	3.09554e-16	153.81	MIAHSESEYEYGK(1)K	3	0.56745	2	1	5.12931e-37	190.85	MIAHSESEYEYGK(1)K	3	-0.85301	1	1	5.40397e-14	166.62	MIAHSESEYEYGK(1)K	3	-0.15595	2	0.474	0.648	0.584	0.763	0.681	0.762	2.396	2.097	2.239	0.761	0.905	0.813	1.228	1.238	1.23	1.003	0.902	1	0.622865	0.716022	0.718327	0.621336	0.550081
CSA014748.1	30	K	polygalacturonate 4-alpha-galacturonosyltransferase	3	2	1	0.0137217	45.722	GGLPGPPPHPPK(1)NATR	3	-0.63104	1	1	2.7656e-06	84.508	GGLPGPPPHPPK(1)NATR	3	-0.4498	1	1	3.3177e-10	101.2	GGLPGPPPHPPK(1)NATR	3	-0.1282	1	1.044	1.075		0.898	0.926		1.127	1.037		1.211	1.101	1.147	0.978	0.956	1.031	0.702	0.738	0.702	0.862097	0.976385		0.9182	0.968619
CSA014825.1	29	K	eukaryotic translation initiation factor 5A4	3	3	1	0.00182167	109.71	K(1)NGYLVIK	2	-0.093119	1	1	0.000602449	122.52	K(1)NGYLVIK	2	-0.05469	1	1	0.000529038	122.52	K(1)NGYLVIK	2	0.62071	1	1.271	1.43	1.347	0.89	0.776	0.803	0.699	0.566	0.612	1.505	1.512	1.447	0.817	0.763	0.817	0.499	0.548	0.594	0.844518	0.945767	0.930891	1.08935	1.01704
CSA014857.1	338	K	probable alkaline/neutral invertase D	3	3	1	1.41154e-20	170.74	YK(1)TEEYSHTAVNK	3	0.32476	1	1	9.87553e-18	160.48	YK(1)TEEYSHTAVNK	3	-3.5281	1	1	5.02368e-17	185.32	YK(1)TEEYSHTAVNK	3	-1.9476	2	1.375	1.433	1.333	0.894	0.979	0.898	0.494	0.322	0.523	1.041	1.124	1.052	0.956	0.921	0.987	0.99	0.914	0.942	1.32085	1.27491	1.26711	0.935146	1.06298
CSA014857.1	445	K	probable alkaline/neutral invertase D	3	3	1	0.0202562	71.888	IVTGCDPK(1)NTR	2	0.15264	1	1	0.00179794	100.07	IVTGCDPK(1)NTR	2	1.1637	1	1	0.00658062	76.24	IVTGCDPK(1)NTR	2	0.97711	1	1.23	1.353	1.267	0.918	0.908	0.96	0.744	0.554	0.577	1.041	1.124	1.052	0.956	0.921	0.987	0.99	0.914	0.942	1.18156	1.20374	1.20437	0.960251	0.985885
CSA014858.1	142	K	peptide-N4-(N-acetyl-beta-glucosaminyl)asparagine amidase A-like	3	2	1	0.00515283	63.944	RTGIDWTVK(1)K	3	-1.7211	1	1	0.0137457	70.942	TGIDWTVK(1)K	2	-0.22097	1	1	0.000788535	102.52	TGIDWTVK(1)K	2	-1.4129	1		0.832	0.794		1.358	1.336		0.977	1.07	0.785	0.747	0.534	1.095	1.09	1.239	1.181	1.253	1.386		1.11379	1.48689		1.24587
CSA014918.1	243	K	thiosulfate/3-mercaptopyruvate sulfurtransferase 1, mitochondrial isoform X1	3	3	1	1.02034e-07	127.18	NIEDK(1)THQHLDAR	3	0.069883	2	1	4.67925e-13	152.88	NIEDK(1)THQHLDAR	4	0.61044	2	1	8.12463e-07	137.8	NIEDK(1)THQHLDAR	4	-0.31363	2	1.051	1.07	1.004	0.943	1.04	1.034	1.059	0.912	1.023	0.926	0.934	0.914	0.941	1.004	1.002	1.104	1.102	1.117	1.13499	1.14561	1.09847	1.00213	1.03586
CSA014983.1	130	K	uncharacterized protein LOC107420052	3	3	1	0.00579189	75.213	IAAHEAK(1)K	3	0.47059	1	1	0.00252546	85.212	IAAHEAK(1)K	3	1.4107	1	1	0.00247755	84.568	IAAHEAK(1)K	3	1.1838	1	0.881	0.926	0.802	0.992	0.784	0.971	1.329	1.473	1.521	1.179			1.034			0.716			0.747243			0.959381
CSA015145.1	23	K	T-complex protein 1 subunit delta	3	3	1	5.13763e-16	171.85	TESYVDNK(1)R	2	-0.33121	1	1	0.000176312	130.41	TESYVDNK(1)R	2	0.37759	2	1	4.3559e-05	142	TESYVDNK(1)R	2	0.10458	1	1.489	1.415	1.438	0.696	0.826	0.781	0.513	0.535	0.453	1.229	1.325	1.249	0.885	0.869	0.858	0.765	0.713	0.71	1.21155	1.06792	1.15132	0.786441	0.950518
CSA015145.1	226	K	T-complex protein 1 subunit delta	3	3	1	0.00106947	108.24	GLVFDK(1)K	3	-2.3497	2	1	0.00410225	88.029	GLVFDK(1)K	3	0.42891	2	1	0.00686878	81.297	GLVFDK(1)K	3	-2.2377	1	1.34	1.367	1.264	0.824	0.833	0.849	0.646	0.614	0.726	1.229	1.325	1.249	0.885	0.869	0.858	0.765	0.713	0.71	1.09032	1.0317	1.01201	0.931073	0.958573
CSA015145.1	285	K	T-complex protein 1 subunit delta	3	3	1	0.000915528	113.62	NYILGMIK(1)K	2	-0.15938	1	1	0.00259801	101.65	NYILGMIK(1)K	2	0.44186	1	1	0.000756601	113.62	NYILGMIK(1)K	2	-1.1431	2	1.33	1.336	1.279	0.833	0.852	0.852	0.653	0.648	0.692	1.229	1.325	1.249	0.885	0.869	0.858	0.765	0.713	0.71	1.08218	1.0083	1.02402	0.941243	0.980437
CSA015292.1	48	K	putative clathrin assembly protein At2g01600	3	3	1	7.84699e-05	96.059	ATNHVECPPK(1)ER	3	0.69347	1	1	0.00183159	67.019	ATNHVECPPK(1)ER	3	1.439	1	1	0.00478698	58.04	ATNHVECPPK(1)ER	3	1.2463	1	0.932	0.973	0.935	0.861	1.007	0.801	1.39	1.127	1.465	0.93			1.02			1.075			1.00215			0.844118
CSA015316.1	138	K	activator of 90 kDa heat shock protein ATPase homolog	3	3	1	0.00041565	87.639	DEGPIGK(1)R	2	0.70554	2	1	0.000113053	123.98	VSVKDEGPIGK(1)R	3	1.9051	2	1	4.95354e-05	101.32	VSVKDEGPIGK(1)R	3	-0.22388	2	1.305	1.31	1.282	0.766	0.805	0.796	0.785	0.749	0.758	1.381	1.374	1.375	0.805	0.81	0.812	0.729	0.685	0.695	0.944967	0.953421	0.932364	0.951553	0.993827
CSA015316.1	338	K	activator of 90 kDa heat shock protein ATPase homolog	3	3	1	0.00513841	77.923	DLIFHK(1)IR	3	0.10616	1	1	0.00820157	76.605	DLIFHK(1)IR	2	-1.7419	2	1	0.000353985	114.28	DLIFHK(1)IR	3	-1.2629	1	1.098	1.065	1.2	0.847	0.886	0.804	1.088	1.102	0.913	1.381	1.374	1.375	0.805	0.81	0.812	0.729	0.685	0.695	0.795076	0.775109	0.872727	1.05217	1.09383
CSA015323.1	414	K	carbon catabolite repressor protein 4 homolog 1	3	2	1	0.00220529	77.644	FNNQGIDNPGK(1)R	2	-0.9006	1	1	0.000174991	97.463	FNNQGIDNPGK(1)R	2	-0.70502	1	1	0.000103673	96.334	FNNQGIDNPGK(1)R	3	-0.10362	1	1.025	1.115		0.927	0.988		1.129	0.893		1.208	1.073	1.094	0.969	0.904	0.952	0.745	1.003	0.921	0.84851	1.03914		0.956656	1.09292
CSA015357.1	634	K	proteasome activator subunit 4	3	2	1	0.00188579	69.864	FLFSNK(1)TATPAK	3	0.2229	1	1	0.00345196	63.091	FLFSNK(1)TATPAK	3	0.58954	1	1	0.00684489	56.205	FLFSNK(1)TATPAK	3	0.16799	1	0.9		0.861	1.213		1.206	1.023		1.098	1.091	1.079	1.086	1.174	1.169	1.159	0.673	0.712	0.686	0.824931		0.792818	1.03322
CSA015357.1	1976	K	proteasome activator subunit 4	3	3	1	0.00295158	99.815	DANAIQK(1)K	2	1.0349	1	1	0.00112656	111.61	DANAIQK(1)K	2	1.6865	1	1	0.0014216	109.29	DANAIQK(1)K	2	2.1726	1	1.038	1.087	1.031	1.275	1.252	1.305	0.68	0.635	0.623	1.091	1.079	1.086	1.174	1.169	1.159	0.673	0.712	0.686	0.951421	1.00741	0.949355	1.08603	1.071
CSA015390.1	81	K	glutathione S-transferase-like	3	3	1	0.0391101	76.228	QNEEK(1)LLK	2	2.7391	1	1	0.00456855	98.048	QNEEK(1)LLK	3	2.7976	3	1	0.00592695	94.692	QNEEK(1)LLK	3	2.421	3	0.279	0.369	0.294	0.588	0.716	0.655	2.986	2.562	2.973	0.524	0.575	0.479	0.958	0.886	0.914	1.759	1.711	1.814	0.532443	0.641739	0.613779	0.613779	0.808126
CSA015390.1	91	K	glutathione S-transferase-like	3	1	1	0.000520609	95.502	VLDVYEK(1)R	2	-1.4645	1	1	0.0357831	66.568	VLDVYEK(1)R	2	1.5677	1	1	0.000768246	116.73	VLDVYEK(1)R	2	-1.1253	1			0.559			0.945			2.058	0.524	0.575	0.479	0.958	0.886	0.914	1.759	1.711	1.814			1.16701
CSA015454.1	29	K	40S ribosomal protein S4-3 isoform X1	3	3	1	0.00303685	72.29	LNAPK(1)HWMLDK	3	1.5692	1	1	0.00107313	77.597	LNAPK(1)HWMLDK	3	1.1443	1	1	0.00258829	71.176	LNAPK(1)HWMLDK	3	-0.25395	1	1.685	1.414	1.412	0.602	0.687	0.611	0.249	0.698	0.724
CSA015454.1	119	K	40S ribosomal protein S4-3 isoform X1	3	3	1	0.00662644	101.25	LLYDTK(1)GR	2	-0.96839	1	1	0.000886683	122.19	LLYDTK(1)GR	2	0.41472	2	1	0.00767139	90.601	LLYDTK(1)GR	2	1.031	2	1.472	1.376	1.325	0.746	0.837	0.774	0.485	0.592	0.696
CSA015454.1	133	K	40S ribosomal protein S4-3 isoform X1	3	3	1	4.88642e-05	101.43	LHSIRDEEAK(1)FK	3	-0.31887	2	1	1.88711e-05	115.34	LHSIRDEEAK(1)FK	3	-0.98846	3	1	1.92284e-05	112.02	LHSIRDEEAK(1)FK	3	0.8421	3	1.52	1.569	1.662	0.626	0.652	0.552	0.54	0.459	0.284
CSA015502.1	215	K	26S proteasome non-ATPase regulatory subunit 14 homolog	3	3	1	0.000683467	121.36	GK(1)VVIDAFR	2	1.4693	1	1	0.00688585	77.744	GK(1)VVIDAFR	2	-0.037864	1	1	0.00053375	125.74	GK(1)VVIDAFR	2	-0.13777	1	1.088	1.032	1.113	1	1.066	1.068	0.918	0.952	0.757
CSA015502.1	270	K	26S proteasome non-ATPase regulatory subunit 14 homolog	3	3	1	0.00852261	91.867	K(1)NELEEK	2	-1.3264	1	1	0.0214543	83.948	K(1)NELEEK	2	-0.29546	2	1	0.00491566	103.55	K(1)NELEEK	2	0.05213	2	1.134	1.17	1.125	1	1.002	0.941	0.832	0.776	0.894
CSA015502.1	283	K	26S proteasome non-ATPase regulatory subunit 14 homolog	3	3	1	0.00236379	86.833	MLLNLHK(1)K	3	0.35549	2	1	0.00615496	73.665	MLLNLHK(1)K	3	-0.30699	2	1	0.0184314	55.531	MLLNLHK(1)K	3	0.71425	1	1.139	1.129	1.167	1.126	1.111	1.095	0.666	0.721	0.611
CSA015512.1	94	K	cytochrome c oxidase subunit 1 (mitochondrion)	3	3	1	0.0153188	95.502	ETK(1)SYVK	2	-0.32779	1	1	0.0314149	83.783	ETK(1)SYVK	2	2.6296	1	1	0.0271567	83.783	ETK(1)SYVK	2	2.2275	1	1.19	1.253	1.122	0.964	0.882	0.959	0.765	0.764	0.877
CSA015535.1	457	K	clathrin heavy chain 1	3	3	1	1.80213e-22	186.13	LVVNQNK(1)K	3	-0.24844	3	1	1.31134e-06	155.75	LVVNQNK(1)K	2	0.9916	2	1	5.29392e-05	141.39	LVVNQNK(1)K	3	0.019665	4	1.075	1.062	1.048	1.03	1.078	1.086	0.908	0.881	0.868	1.041	1.062	1.035	1.046	1.041	1.049	0.883	0.864	0.883	1.03266	1	1.01256	0.984704	1.03554
CSA015535.1	774	K	clathrin heavy chain 1	3	2	1	0.00293364	110.08	TK(1)NFLMEAK	2	0.3204	1	1	0.00370705	105.03	TK(1)NFLMEAK	2	-0.52491	1	1	0.00108867	110.08	TK(1)NFLMEAK	2	-0.82067	1	1.091		1.073	1.152		1.106	0.728		0.79	1.041	1.062	1.035	1.046	1.041	1.049	0.883	0.864	0.883	1.04803		1.03671	1.10134
CSA015535.1	865	K	clathrin heavy chain 1	3	3	1	2.29044e-10	118.16	SLLPVEPLVEECEK(1)R	3	-1.7205	1	1	1.5004e-10	124.16	SLLPVEPLVEECEK(1)R	3	-3.7758	1	1	2.67504e-10	103.14	SLLPVEPLVEECEK(1)R	3	-0.86298	1	0.86	0.906	0.987	0.987	0.962	1.101	1.376	1.301	0.976	1.041	1.062	1.035	1.046	1.041	1.049	0.883	0.864	0.883	0.826129	0.853107	0.953623	0.943595	0.924111
CSA015535.1	1247	K	clathrin heavy chain 1	3	2	1	0.0120222	82.261	LAVTLVK(1)LR	2	-0.64625	1	1	0.00118669	120.45	LAVTLVK(1)LR	2	-0.47378	2	1	5.66295e-05	103.88	LAVTLVK(1)LR	2	-1.6199	2	1.075	0.961		1.122	1.032		0.795	1.121		1.041	1.062	1.035	1.046	1.041	1.049	0.883	0.864	0.883	1.03266	0.904896		1.07266	0.991354
CSA015535.1	1530	K	clathrin heavy chain 1	3	3	1	4.32907e-06	136.11	VAAYIYK(1)K	3	1.8309	2	1	0.0012725	109.01	VAAYIYK(1)K	3	4.1568	2	1	0.00128149	110.81	VAAYIYK(1)K	3	2.9656	3	1.084	0.97	0.97	1.053	1.041	0.968	0.861	1.093	1.178	1.041	1.062	1.035	1.046	1.041	1.049	0.883	0.864	0.883	1.04131	0.913371	0.937198	1.00669	1
CSA015535.1	1543	K	clathrin heavy chain 1	3	3	1	0.00150104	112.13	QSIALSK(1)K	3	0.9764	2	1	0.00251455	100.88	QSIALSK(1)K	2	0.524	2	1	0.00188961	104.22	QSIALSK(1)K	3	0.94755	2	0.948	1.046	0.967	1.051	1.081	1.115	1.127	0.909	0.997	1.041	1.062	1.035	1.046	1.041	1.049	0.883	0.864	0.883	0.910663	0.984934	0.9343	1.00478	1.03842
CSA015562.1	202	K	2-C-methyl-D-erythritol 4-phosphate cytidylyltransferase, chloroplastic	3	3	1	1.6682e-06	135.99	PLVTTGDVK(1)K	2	-1.1192	1	1	0.000317672	120.77	PLVTTGDVK(1)K	3	-0.30518	2	1	0.000207449	137.89	PLVTTGDVK(1)K	2	-0.40337	1	0.674	0.658	0.684	1.281	1.336	1.25	1.378	1.316	1.409	0.527	0.6	0.595	1.104	1.069	1.058	1.553	1.474	1.506	1.27894	1.09667	1.14958	1.16033	1.24977
CSA015615.1	136	K	patatin-like protein 2	3	3	1	0.00595459	67.113	YLHDVVK(1)EK	3	1.3345	1	1	0.0319662	46.406	YLHDVVK(1)EK	3	-1.3085	1	1	0.00580698	67.704	YLHDVVK(1)EK	3	-2.8095	1	0.999	0.985	0.87	1.113	1.211	1.291	0.953	0.867	0.972	0.775	0.777	0.827	1.268	1.255	1.254	1.033	1.008	1	1.28903	1.2677	1.052	0.87776	0.96494
CSA015615.1	239	K	patatin-like protein 2	3	3	1	0.00150257	103.91	K(1)SADYFAIK	2	-0.23226	1	1	0.0025733	103.91	K(1)SADYFAIK	2	0.62582	2	1	0.0062095	76.332	K(1)SADYFAIK	2	-0.18176	1	0.7	0.746	0.701	1.483	1.411	1.433	1.081	1.069	1.141	0.775	0.777	0.827	1.268	1.255	1.254	1.033	1.008	1	0.903226	0.960103	0.847642	1.16956	1.1243
CSA015629.1	180	K	probable galactinol--sucrose galactosyltransferase 2	3	3	1	0.00180711	80.037	AVEK(1)HMQTFR	3	-0.7314	2	1	0.00017421	117.25	AVEK(1)HMQTFR	3	0.44239	2	1	4.24664e-10	119.74	AVEK(1)HMQTFR	3	0.42122	3	1.355	1.25	1.059	0.735	0.747	0.733	0.724	0.928	1.295	1.409	1.406	1.437	0.746	0.765	0.731	0.745	0.712	0.723	0.961675	0.889047	0.736952	0.985255	0.976471
CSA015683.1	236	K	dnaJ protein P58IPK homolog	3	2	1	0.00151486	80.706	LDPEHSELK(1)K	3	-0.23731	1	1	0.0138036	53.124	LDPEHSELK(1)K	3	-3.2672	1	1	0.000192535	111.27	LDPEHSELK(1)K	3	1.0155	2	1.009		1.103	1.007		1.038	1.062		0.817	1.207	1.166	1.147	0.974	1.023	0.997	0.709	0.847	0.793	0.835957		0.961639	1.03388
CSA015684.1	431	K	protein TRIGALACTOSYLDIACYLGLYCEROL 4, chloroplastic	3	3	1	6.82449e-33	194.52	FLLDSSSSGK(1)R	2	0.058311	1	1	5.33601e-05	125.97	FLLDSSSSGK(1)R	2	0.52226	1	1	2.46309e-06	153.54	FLLDSSSSGK(1)R	2	-1.2802	1	0.867	0.895	0.888	1.06	1.148	1.151	1.273	1.104	1.114	1.028	1.071	0.891	1.006	0.949	1.015	0.955	0.956	1.134	0.843385	0.835668	0.996633	1.05368	1.20969
CSA015706.1	68	K	cytochrome b5	3	3	1	0.00360999	111.95	AAK(1)NLILK	2	-0.1179	2	1	0.00160296	111.95	AAK(1)NLILK	2	-0.97309	2	1	0.00167001	111.95	AAK(1)NLILK	2	-1.0691	2	1.287	1.328	1.416	0.708	0.751	0.646	0.892	0.78	0.673	1.716	1.688	1.729	0.569	0.599	0.599	0.514	0.481	0.419	0.75	0.78673	0.818971	1.24429	1.25376
CSA015710.1	177	K	TATA BINDING protein ASSOCIATED FACTOR 21KDA SUBUNIT	3	3	1	2.55999e-10	152.54	VSFPLVGAK(1)R	3	-1.0256	4	1	1.29763e-08	148.56	VSFPLVGAK(1)R	3	-0.55197	3	1	5.85533e-15	180.09	VSFPLVGAK(1)R	3	-0.2303	7	0.988	0.986	0.934	0.933	0.903	0.944	1.195	1.225	1.284	1.232	1.228		0.862	0.884		0.828	0.809		0.801948	0.802932		1.08237	1.02149
CSA015733.1	231	K	ATP synthase delta chain, chloroplastic	3	3	1	0.000246873	126.07	LIDMSVK(1)K	3	-0.95779	2	1	0.000493209	126.07	LIDMSVK(1)K	3	-0.66678	2	1	0.000126226	135.71	LIDMSVK(1)K	2	0.14571	2	0.48	0.437	0.476	1.08	1.052	1.04	1.997	2.047	2.106	0.395	0.405	0.373	0.825	0.828	0.795	2.086	2.041	2.113	1.21519	1.07901	1.27614	1.30909	1.27053
CSA015743.1	268	K	elongation factor 2	3	3	1	0.00131248	94.309	STGSATCK(1)R	2	-0.0074266	1	1	3.81699e-06	144.77	STGSATCK(1)R	2	-0.55842	1	1	0.0187116	66.056	STGSATCK(1)R	2	-0.51401	1	1.542	1.54	1.525	0.684	0.68	0.673	0.426	0.478	0.412	1.337	1.353	1.362	0.84	0.791	0.808	0.678	0.711	0.667	1.15333	1.13821	1.11968	0.814286	0.859671
CSA015743.1	310	K	elongation factor 2	3	3	1	0.00153441	116.55	AEEK(1)DLMGK	2	0.54407	1	1	0.00386925	94.767	AEEK(1)DLMGK	2	1.231	1	1	0.00110753	105.46	AEEK(1)DLMGK	2	0.90664	1	1.209	1.085	1.16	0.79	0.887	0.777	0.94	1.064	1.032	1.337	1.353	1.362	0.84	0.791	0.808	0.678	0.711	0.667	0.904263	0.801922	0.851689	0.940476	1.12137
CSA015743.1	722	K	elongation factor 2	3	3	1	1.48874e-12	159.5	VIYASQLTAK(1)PR	2	-0.11718	1	1	5.9816e-12	152.4	VIYASQLTAK(1)PR	2	-1.2839	1	1	4.4866e-06	143.31	VIYASQLTAK(1)PR	2	-0.37843	1	1.072	1.002	0.962	0.827	0.943	0.803	1.16	1.149	1.406	1.337	1.353	1.362	0.84	0.791	0.808	0.678	0.711	0.667	0.801795	0.740576	0.706314	0.984524	1.19216
CSA015744.1	72	K	uncharacterized protein LOC107412951 isoform X1	3	2	1	0.0115776	101.69	LIAAK(1)LK	2	-0.77581	1	1	0.0346451	82.305	LIAAK(1)LK	2	-0.13134	1	1	0.0139066	94.262	LIAAK(1)LK	2	-0.0074628	1		1.01	0.941		1.147	1.16		0.896	0.995			0.938			1.019			1.064			1.0032
CSA015792.1	115	K	40S ribosomal protein S3-3	3	3	1	0.00231039	100.38	TQNVLGEK(1)GR	3	-0.038085	2	1	0.000340768	123.95	TQNVLGEK(1)GR	3	-2.0963	2	1	9.13021e-06	145.31	TQNVLGEK(1)GR	2	-1.1428	1	1.287	1.278	1.323	0.952	0.937	0.93	0.591	0.654	0.5	1.277	1.271	1.25	0.943	0.957	0.954	0.674	0.671	0.687	1.00783	1.00551	1.0584	1.00954	0.979101
CSA015866.1	143	K	ATP-dependent 6-phosphofructokinase 2	3	3	1	0.0238511	72.096	EIFGVK(1)SGYR	2	-0.91226	1	1	0.00335512	97.439	EIFGVK(1)SGYR	2	-0.056875	1	1	0.00101088	113.61	EIFGVK(1)SGYR	2	0.63288	1	0.862	0.852	0.871	1.077	1.063	1.013	1.262	1.28	1.326	0.934	0.932	0.927	1.005	1.019	1.051	1.105	1.079	1.077	0.922912	0.914163	0.93959	1.07164	1.04318
CSA015870.1	180	K	sucrose-phosphatase 2-like	3	3	1	0.000634588	115.57	ALSVQLEK(1)R	3	-2.0187	2	1	0.00036356	127.51	ALSVQLEK(1)R	2	-1.2925	1	1	3.22983e-07	157.78	ALSVQLEK(1)R	2	-0.28505	1	0.67	0.761	0.709	0.991	0.904	0.978	1.74	1.633	1.705	0.902	0.684	0.647	0.918	0.895	0.941	1.276	1.527	1.523	0.742794	1.11257	1.09583	1.07952	1.01006
CSA015870.1	213	K	sucrose-phosphatase 2-like	3	1	1	0.00577322	64.103	GQALAYLHK(1)K	3	0.7738	1	1	0.0107154	57.174	GQALAYLHK(1)K	3	0.40012	1	1	0.00483266	66.19	GQALAYLHK(1)K	3	0.28226	2			0.925			1.039			1.181	0.902	0.684	0.647	0.918	0.895	0.941	1.276	1.527	1.523			1.42968
CSA015978.1	312	K	uncharacterized protein LOC105647294	3	2	1	3.35455e-13	107.74	AANAQAALAYQLYQK(1)K	3	1.1106	1	1	1.29305e-14	119.62	AANAQAALAYQLYQK(1)K	3	-0.11388	1	1	8.14577e-06	79.652	AANAQAALAYQLYQK(1)K	3	-0.18205	1	0.927	0.993		1.171	1.135		1.021	0.942		1.019	1.033	0.995	1.145	1.081	1.108	0.813	0.843	0.857	0.909715	0.961278		1.02271	1.04995
CSA015978.1	324	K	uncharacterized protein LOC105647294	3	3	1	0.0190039	83.206	WEALVK(1)K	2	0.88642	1	1	0.00306522	106.36	WEALVK(1)K	3	0.4548	2	1	0.0087719	95.909	WEALVK(1)K	2	-0.91177	1	1.035	1.155	1.077	1.212	1.087	1.131	0.762	0.705	0.749	1.019	1.033	0.995	1.145	1.081	1.108	0.813	0.843	0.857	1.0157	1.1181	1.08241	1.05852	1.00555
CSA015998.1	435	K	Putative primary amine oxidase 2	3	2	1	0.0107513	75.213	NAHSLK(1)K	3	0.69083	1	1	0.01521	67.169	NAHSLK(1)K	3	0.80709	1	1	0.0175556	64.265	NAHSLK(1)K	3	1.0704	1	1.193	1.085		1.067	0.943		0.634	0.997
CSA016033.1	126	K	kinesin-like protein KIN-14B	3	3	1	0.000212392	124.67	ISPLINEK(1)K	3	1.1554	2	1	0.00255637	105.46	ISPLINEK(1)K	2	-0.063987	1	1	3.12716e-10	164.33	ISPLINEK(1)K	2	0.8849	1	0.938	0.892	1.037	1.085	0.978	1.252	1.106	1.307	0.677	0.906	0.951	0.89	1.071	1.071	1.084	1.028	1.005	1.077	1.03532	0.93796	1.16517	1.01307	0.913165
CSA016043.1	292	K	ATP-dependent Clp protease ATP-binding subunit ClpA homolog CD4B, chloroplastic-like	3	3	1	9.18077e-08	99.055	TK(1)NNPCLIGEPGVGK	3	-1.664	1	1	0.000869194	67.646	TK(1)NNPCLIGEPGVGK	3	-1.1888	1	1	3.73894e-15	157.74	TK(1)NNPCLIGEPGVGK	2	0.10381	2	1.008	1.021	1.001	1.222	1.255	1.281	0.802	0.749	0.715	0.648	0.577	0.649	1.146	1.178	1.15	1.289	1.333	1.313	1.55556	1.7695	1.54237	1.06632	1.06537
CSA016043.1	413	K	ATP-dependent Clp protease ATP-binding subunit ClpA homolog CD4B, chloroplastic-like	3	3	0.999999	2.24001e-05	121.56	K(1)HIEKDPALER	4	-1.91	2	0.999994	0.000181439	111.31	K(1)HIEKDPALER	4	0.15973	2	0.999999	0.000154188	115.12	K(1)HIEKDPALER	4	-0.047973	2	0.698	0.702	0.719	1.251	1.306	1.15	1.368	1.272	1.465	0.648	0.577	0.649	1.146	1.178	1.15	1.289	1.333	1.313	1.07716	1.21664	1.10786	1.09162	1.10866
CSA016043.1	454	K	ATP-dependent Clp protease ATP-binding subunit ClpA homolog CD4B, chloroplastic-like	3	3	1	0.000440881	128	YEIHHK(1)LR	3	0.28594	5	1	0.000223862	118.5	YEIHHK(1)LR	3	0.80913	7	1	0.000433394	111.95	YEIHHK(1)LR	3	1.4424	7	0.752	0.823	0.779	1.357	1.257	1.189	1.133	1.108	1.291	0.648	0.577	0.649	1.146	1.178	1.15	1.289	1.333	1.313	1.16049	1.42634	1.20031	1.18412	1.06706
CSA016043.1	605	K	ATP-dependent Clp protease ATP-binding subunit ClpA homolog CD4B, chloroplastic-like	3	3	1	2.88786e-05	131.06	MEETLHK(1)R	2	-1.4049	6	1	6.47939e-05	135	MEETLHK(1)R	3	0.16625	6	1	0.000187309	120.15	MEETLHK(1)R	3	0.30578	6	0.946	0.965	0.913	1.058	1.075	1.06	1.123	1.062	1.179	0.648	0.577	0.649	1.146	1.178	1.15	1.289	1.333	1.313	1.45988	1.67244	1.40678	0.923211	0.912564
CSA016043.1	816	K	ATP-dependent Clp protease ATP-binding subunit ClpA homolog CD4B, chloroplastic-like	3	3	1	0.0107784	91.549	QLTK(1)LEVK	2	0.94506	1	1	0.00309976	102.52	QLTK(1)LEVK	2	0.98036	3	1	0.00449938	98.04	QLTK(1)LEVK	2	-1.7513	1	0.832	0.938	0.886	1.188	1.163	1.222	1.184	1.009	1.027	0.648	0.577	0.649	1.146	1.178	1.15	1.289	1.333	1.313	1.28395	1.62565	1.36518	1.03665	0.987267
CSA016057.1	94	K	galactokinase	3	3	1	0.0037883	92.838	DAGEPEK(1)R	2	0.22431	1	1	0.00894385	85.862	DAGEPEK(1)R	2	-0.30271	1	1	0.0163562	74.173	DAGEPEK(1)R	2	0.83421	1	0.955	0.964	0.904	1.066	1.087	1.118	1.096	1.051	1.122	0.928	0.878	0.903	1.033	1.047	1.034	1.038	1.111	1.113	1.02909	1.09795	1.00111	1.03195	1.0382
CSA016057.1	406	K	galactokinase	3	3	1	5.71741e-16	170.89	ASHVYSEAK(1)R	2	1.4869	2	1	0.000707648	90.827	ASHVYSEAK(1)R	3	-0.13235	1	1	0.000180111	109.83	ASHVYSEAK(1)R	3	1.011	2	1.105	1.463	1.065	0.991	0.723	0.687	0.898	0.566	1.342	0.928	0.878	0.903	1.033	1.047	1.034	1.038	1.111	1.113	1.19073	1.66629	1.1794	0.959342	0.690544
CSA016076.1	40	K	phenylalanine ammonia-lyase	3	3	1	2.37343e-07	146.11	GSHLDEVK(1)R	2	0.38628	2	1	7.38402e-09	157.75	GSHLDEVK(1)R	3	0.090767	2	1	0.000145537	133.81	GSHLDEVK(1)R	2	-1.1273	3	1.858	1.877	1.694	0.392	0.328	0.471	0.17	0.275	0.324	1.784	1.736	1.802	0.424	0.536	0.455	0.497	0.595	0.481	1.04148	1.08122	0.940067	0.924528	0.61194
CSA016076.1	540	K	phenylalanine ammonia-lyase	3	3	1	0.00131354	94.363	NSVSQVAK(1)R	2	-0.84951	1	1	2.8809e-05	136.27	NSVSQVAK(1)R	2	0.45778	1	1	0.000543116	121.41	NSVSQVAK(1)R	2	0.17132	1	1.855	1.714	1.707	0.327	0.525	0.385	0.256	0.343	0.406	1.784	1.736	1.802	0.424	0.536	0.455	0.497	0.595	0.481	1.0398	0.987327	0.947281	0.771226	0.979478
CSA016128.1	362	K	pyrophosphate-energized vacuolar membrane proton pump	3	3	1	0.00102511	115.71	EIEPALK(1)K	2	-1.0769	1	1	0.000895503	115.71	EIEPALK(1)K	2	0.26695	1	1	0.000828403	115.71	EIEPALK(1)K	2	-0.39685	1	1.39	1.531	1.463	0.865	0.91	0.817	0.498	0.228	0.356	1.523	1.287	1.528	0.923	1.009	0.943	0.358	0.47	0.33	0.912672	1.18959	0.957461	0.937161	0.901883
CSA016157.1	131	K	biotin carboxyl carrier protein of acetyl-CoA carboxylase	3	3	1	0.000252067	94.692	VGDFEMHLK(1)R	2	0.089036	2	1	2.3415e-06	137.28	VGDFEMHLK(1)R	3	0.44676	1	1	0.000156299	107.08	VGDFEMHLK(1)R	3	-0.49228	1	0.839	0.917	0.916	1.01	1.229	1.206	1.387	0.97	0.985	1.002	0.948	0.98	1.117	1.21	1.218	0.804	0.772	0.785	0.837325	0.9673	0.934694	0.904208	1.0157
CSA016228.1	22	K	urease-like	3	3	1	1.11525e-07	125.54	LMLHDAGYLAQK(1)R	3	-1.5587	1	1	1.14588e-05	104.59	LMLHDAGYLAQK(1)R	3	-0.44832	1	1	3.39984e-05	93.623	LMLHDAGYLAQK(1)R	3	-0.49487	2	1.137	1.259	1.192	0.93	0.851	0.86	0.908	0.787	0.861		0.698			1			1.417			1.80372			0.851
CSA016237.1	150	K	reactive Intermediate Deaminase A, chloroplastic	3	3	1	0.00933704	83.499	K(1)VNEIYAK	2	0.10593	1	1	0.00134139	107.79	K(1)VNEIYAK	2	-1.2243	1	1	0.00156031	107.79	K(1)VNEIYAK	2	-1.0042	1	0.908	0.91	0.924	0.994	1.005	1.04	1.273	1.244	1.182	1.105	1.157	1.1	1.016	1.006	0.992	0.828	0.766	0.875	0.821719	0.786517	0.84	0.978346	0.999006
CSA016270.1	124	K	heat shock 70 kDa protein 6, chloroplastic-like	3	3	1	0.00779461	86.095	LVGQIAK(1)R	2	-0.97134	1	1	0.00793951	87.251	LVGQIAK(1)R	2	-0.7926	1	1	0.0145674	76.478	LVGQIAK(1)R	2	-0.67126	1	0.807	0.868	0.939	0.846	0.833	0.753	1.652	1.52	1.518	0.489	0.545	0.607	0.504	0.564	0.577	2.242	2.113	2	1.65031	1.59266	1.54695	1.67857	1.47695
CSA016270.1	139	K	heat shock 70 kDa protein 6, chloroplastic-like	3	3	1	2.17798e-11	125.36	QAVVNPENTFFSVK(1)R	3	-0.91735	1	1	9.02694e-11	131.18	QAVVNPENTFFSVK(1)R	2	2.875	2	1	5.92727e-10	101.2	QAVVNPENTFFSVK(1)R	2	1.3926	2	0.942	0.661	0.752	0.937	0.813	0.993	1.279	1.919	1.596	0.489	0.545	0.607	0.504	0.564	0.577	2.242	2.113	2	1.92638	1.21284	1.23888	1.85913	1.44149
CSA016290.1	15	K	60S ribosomal protein L30-like	3	3	1	0.00173675	81.335	K(1)THESINSR	3	-2.2272	1	1	0.000714622	95.618	K(1)THESINSR	3	-2.7193	2	1	0.00387749	69.261	K(1)THESINSR	3	-2.9502	2	1.204	1.243	1.252	1.012	0.986	0.909	0.68	0.661	0.674	1.401	1.403	1.47	0.949	0.96	0.953	0.457	0.418	0.443	0.859386	0.885959	0.851701	1.06639	1.02708
CSA016290.1	29	K	60S ribosomal protein L30-like	3	3	1	0.00325059	86.898	LALVMK(1)SGK	2	0.39257	4	1	0.00155164	117.7	LALVMK(1)SGK	3	-0.10158	3	1	0.00110543	105.98	LALVMK(1)SGK	2	0.0077331	5	1.083	1.149	1.134	1.024	0.97	0.936	0.899	0.851	0.883	1.401	1.403	1.47	0.949	0.96	0.953	0.457	0.418	0.443	0.773019	0.818959	0.771429	1.07903	1.01042
CSA016400.1	17	K	ferritin-1, chloroplastic-like	3	3	1	0.00417224	116.54	GLAK(1)FFK	2	0.45185	2	1	0.00496872	116.54	GLAK(1)FFK	2	-0.797	2	1	0.00337436	116.54	GLAK(1)FFK	2	-0.032324	2	0.523	0.581	0.348	2.123	2.099	2.345	0.642	0.569	0.698	0.394	0.453	0.474	1.301	1.318	1.286	1.441	1.374	1.49	1.32741	1.28256	0.734177	1.63182	1.59256
CSA016400.1	32	K	ferritin-1, chloroplastic-like	3	3	1	0.000554155	71.08	ESSEEEREHAEK(1)FMK	4	2.5205	2	1	0.00162929	63.682	ESSEEEREHAEK(1)FMK	4	2.196	1	1	6.97965e-10	103.32	ESSEEEREHAEK(1)FMK	4	0.96059	3	0.528	0.67	0.578	1.839	1.699	1.736	0.982	0.87	1.004	0.394	0.453	0.474	1.301	1.318	1.286	1.441	1.374	1.49	1.3401	1.47903	1.21941	1.41353	1.28907
CSA016462.1	334	K	heat shock cognate 70 kDa protein 2	3	3	1	2.01642e-16	121.01	MDK(1)STVHDVVLVGGSTR	3	-2.0845	2	1	2.02283e-18	136.7	MDK(1)STVHDVVLVGGSTR	3	-0.74559	2	1	2.46913e-20	135.18	MDK(1)STVHDVVLVGGSTR	3	-1.6106	2	0.993	1.034	1.019	0.84	0.85	0.976	1.298	1.198	1.069	1.333	1.257	1.325	1.012	1.038	1.024	0.519	0.596	0.554	0.744936	0.822593	0.769057	0.83004	0.818882
CSA016545.1	23	K	ras-related protein Rab7	3	3	1	0.00304996	109.71	K(1)FSQQYK	2	0.26464	1	1	0.00702479	96.948	K(1)FSQQYK	2	-0.37422	1	1	0.00388369	108.74	K(1)FSQQYK	2	1.5539	1	0.989	1.032	1.011	1.067	1.097	1.07	1.028	0.917	0.964	1.173	1.275	1.305	0.912	0.887	0.867	0.856	0.742	0.722	0.843137	0.809412	0.774713	1.16996	1.23675
CSA016596.1	11	K	stress-response A/B barrel domain-containing protein HS1	3	0	1	0.000289003	68.657	GVVK(1)HILLAK	3	-1.5893	2	1	0.00111801	76.943	GVVK(1)HILLAK	3	-1.071	1	1	0.00248022	68.657	GVVK(1)HILLAK	3	-0.69631	2										1.01	0.987	0.965	0.972	0.944	0.958	1.015	1.142	1.065
CSA016604.1	10	K	nucleoside diphosphate kinase B-like	3	3	1	4.68632e-05	91.307	AFAEK(1)HYEDLSAK	3	0.29745	1	1	0.000142489	84.759	AFAEK(1)HYEDLSAK	3	0.90106	1	1	4.51566e-05	92.939	AFAEK(1)HYEDLSAK	3	1.111	1	1.052	1.054	0.973	1.133	1.141	1.152	0.826	0.824	0.938
CSA016615.1	19	K	probable bifunctional TENA-E protein	3	1	1	3.58706e-09	98.337	K(1)HSVAYSGATR	2	3.0346	1	1	0.00144349	74.987	K(1)HSVAYSGATR	3	0.90756	1	1	0.000631563	70.54	K(1)HSVAYSGATR	2	1.4507	2		1.103			1.066			0.822		0.887	0.818	0.809	1.149	1.148	1.155	0.996	1.001	1.097		1.34841			0.928571
CSA016656.1	6	K	probable histone H2A.3	3	3	1	0.000339513	113.61	GK(1)SLGSAAPK	2	3.695	10	1	9.29813e-05	130.56	GK(1)SLGSAAPK	3	0.035748	4	1	0.000865694	110.08	GK(1)SLGSAAPK	3	-0.35236	11	1.257	1.302	1.29	1.013	1.011	0.978	0.576	0.526	0.506	1.488		1.89	0.761		0.614	0.583		0.185	0.844758		0.68254	1.33114
CSA016656.1	14	K	probable histone H2A.3	3	3	1	0.000233633	123.75	SLGSAAPK(1)K	2	-0.03347	1	1	0.000867525	104.22	SLGSAAPK(1)K	3	-0.058424	2	1	0.000773388	107.79	SLGSAAPK(1)K	3	0.14387	3	1.24	1.276	1.252	1.186	1.141	1.108	0.397	0.42	0.42	1.488		1.89	0.761		0.614	0.583		0.185	0.833333		0.662434	1.55848
CSA016678.1	292	K	pyridoxal kinase-like isoform X1	3	3	1	0.000844613	90.15	LIGSHQK(1)EK	3	1.1698	1	1	0.000781803	103.19	LIGSHQK(1)EK	3	2.2621	1	1	0.00950094	62.104	LIGSHQK(1)EK	3	1.1394	1	0.778	0.909	0.879	1.009	0.94	0.971	1.506	1.321	1.363	0.864	0.884	0.987	1.092	1.025	1.037	1.025	1.084	0.921	0.900463	1.02828	0.890578	0.923993	0.917073
CSA016705.1	308	K	peptidyl-prolyl cis-trans isomerase FKBP62	3	3	1	2.95299e-10	151.26	LQDGTIFLK(1)K	3	0.85233	2	1	0.00159906	86.772	LQDGTIFLK(1)K	2	0.27063	2	1	0.000517258	125.54	LQDGTIFLK(1)K	3	-2.1819	2	1.376	1.252	1.206	1.012	0.986	0.995	0.348	0.644	0.658	1.342	1.357	1.371	0.894	0.927	0.914	0.587	0.593	0.532	1.02534	0.922623	0.87965	1.13199	1.06365
CSA016705.1	401	K	peptidyl-prolyl cis-trans isomerase FKBP62	3	3	1	0.0370701	73.665	IEAAGK(1)K	2	-2.1367	1	1	0.00869659	93.374	IEAAGK(1)K	2	-1.9343	1	1	0.00435763	106.36	IEAAGK(1)K	2	-1.8065	1	1.208	1.238	1.274	0.926	0.931	0.876	0.776	0.736	0.67	1.342	1.357	1.371	0.894	0.927	0.914	0.587	0.593	0.532	0.900149	0.912307	0.929249	1.03579	1.00431
CSA016705.1	523	K	peptidyl-prolyl cis-trans isomerase FKBP62	3	3	1	0.00256052	120.15	LEYK(1)TLK	2	-0.74288	1	1	0.0103575	96.668	LEYK(1)TLK	2	-0.23324	1	1	0.00281335	120.15	LEYK(1)TLK	2	0.84314	2	1.428	1.536	1.282	0.913	0.85	0.931	0.368	0.287	0.584	1.342	1.357	1.371	0.894	0.927	0.914	0.587	0.593	0.532	1.06408	1.13191	0.935084	1.02125	0.916936
CSA016736.1	158	K	ferredoxin--NADP reductase, leaf isozyme, chloroplastic	3	3	1	0.0110071	58.274	MFFEK(1)HVDYK	3	0.41042	2	1	0.00567069	64.64	MFFEK(1)HVDYK	3	0.20826	3	1	0.00906516	60.598	MFFEK(1)HVDYK	3	1.1167	2	0.659	0.631	0.634	1.158	1.141	1.117	1.556	1.592	1.68	0.422	0.505	0.522	0.802	0.866	0.827	1.989	1.81	1.821	1.56161	1.2495	1.21456	1.44389	1.31755
CSA016761.1	93	K	glyceraldehyde-3-phosphate dehydrogenase, cytosolic	3	3	1	0.00213319	98.156	TLLFGDK(1)PVR	2	0.88292	1	1	0.000860427	117.09	TLLFGDK(1)PVR	2	-0.17903	1	1	0.00156828	94.465	TLLFGDK(1)PVR	2	1.3123	1	1.406	1.497	1.379	0.742	0.682	0.734	0.617	0.553	0.636	1.508	1.768	1.585	0.985	0.709	0.785	0.312	0.225	0.279	0.932361	0.846719	0.870032	0.753299	0.961918
CSA016772.1	148	K	omega-amidase, chloroplastic	3	3	1	0.0097773	74.962	QAIEDAAK(1)R	2	0.20876	2	1	0.0226398	64.64	QAIEDAAK(1)R	2	0.5347	1	1	0.0168786	67.08	QAIEDAAK(1)R	2	0.35932	1	0.756	0.811	0.852	0.972	1.026	1.009	1.595	1.397	1.369	0.914	0.844	0.879	1.039	1.082	1.085	1.022	1.051	1.082	0.827133	0.9609	0.969283	0.935515	0.948244
CSA016812.1	180	K	ribonucleoside-diphosphate reductase large subunit	3	3	1	4.35056e-10	116.58	VAVGIHK(1)NDIDSVIK	3	-0.09227	1	1	1.1796e-10	126.71	VAVGIHK(1)NDIDSVIK	3	-1.0705	1	1	2.93999e-10	104.55	VAVGIHK(1)NDIDSVIK	3	-0.58393	1	0.948	0.993	0.735	0.817	0.797	0.768	1.413	1.336	1.921	1.665	1.762	1.78	0.575	0.549	0.478	0.514	0.433	0.513	0.569369	0.563564	0.412921	1.42087	1.45173
CSA016812.1	292	K	ribonucleoside-diphosphate reductase large subunit	3	3	1	0.00873374	76.228	YVDQGGGK(1)R	2	-0.18215	1	1	0.00859308	74.841	YVDQGGGK(1)R	2	0.61505	1	1	0.000297539	127.76	YVDQGGGK(1)R	2	0.32504	1	1.693	1.697	1.699	0.471	0.597	0.441	0.392	0.29	0.352	1.665	1.762	1.78	0.575	0.549	0.478	0.514	0.433	0.513	1.01682	0.96311	0.954494	0.81913	1.08743
CSA016812.1	414	K	ribonucleoside-diphosphate reductase large subunit	3	3	1	5.53489e-25	187.11	K(1)SNQQNLGTIK	2	-0.00099082	2	1	0.000361802	111.12	K(1)SNQQNLGTIK	2	-0.92959	2	1	0.000115172	135.81	K(1)SNQQNLGTIK	2	-0.61175	2	1.486	1.377	1.501	0.587	0.638	0.544	0.652	0.821	0.627	1.665	1.762	1.78	0.575	0.549	0.478	0.514	0.433	0.513	0.892492	0.781498	0.843258	1.02087	1.16211
CSA016812.1	706	K	ribonucleoside-diphosphate reductase large subunit	3	3	1	0.000748561	123.86	TVWEIK(1)QK	3	0.1372	2	1	0.0101901	88.495	TVWEIK(1)QK	2	1.192	2	1	0.0124727	65.246	TVWEIK(1)QK	3	0.68106	1	1.45	1.077	1.387	0.592	0.747	0.624	0.717	1.241	0.76	1.665	1.762	1.78	0.575	0.549	0.478	0.514	0.433	0.513	0.870871	0.611237	0.779213	1.02957	1.36066
CSA016826.1	20	K	probable pyridoxal 5'-phosphate synthase subunit PDX1	3	2	1	0.0359027	74.165	K(1)STFSVK	2	-3.2076	1	1	0.00333039	113.71	K(1)STFSVK	2	-0.53682	1	1	0.0239231	80.688	K(1)STFSVK	2	-0.56373	1		0.847	0.861		1.253	1.19		1.069	1.12
CSA016826.1	84	K	probable pyridoxal 5'-phosphate synthase subunit PDX1	3	3	1	0.000619304	90.759	MSDPQLIK(1)EIK	2	-0.87196	4	1	0.00180848	99.844	MSDPQLIK(1)EIK	2	-2.025	1	1	0.000843384	96.059	MSDPQLIK(1)EIK	2	-0.39182	1	0.553	0.525	0.494	1.176	1.147	1.231	1.738	1.776	1.822
CSA016853.1	44	K	cinnamoyl-CoA reductase 1	3	3	1	0.000448211	80.746	K(1)TEHLLALDGAK	3	-0.36518	1	1	0.000871712	74.649	K(1)TEHLLALDGAK	3	-0.084353	1	1	0.00382241	58.32	K(1)TEHLLALDGAK	3	-0.22866	1	0.9	0.962	0.894	0.962	0.936	1.048	1.328	1.229	1.234	0.81	0.835	0.885	1.183	1.149	1.12	1.066	1.067	1.029	1.11111	1.1521	1.01017	0.813187	0.814621
CSA016882.1	18	K	basic leucine zipper and W2 domain-containing protein 2-like	3	3	1	2.60684e-10	141.13	AGLVPLVEYHEK(1)K	3	0.50993	1	1	2.41199e-07	120.87	AGLVPLVEYHEK(1)K	3	-1.2712	1	1	0.0182105	44.511	AGLVPLVEYHEK(1)K	3	-2.3821	1	1.231	1.197	0.804	1.008	1.04	1.1	0.632	0.68	1.351	1.307	1.287	1.251	1.012	1.028	1.018	0.678	0.558	0.637	0.941852	0.93007	0.642686	0.996047	1.01167
CSA016907.1	197	K	protein FLX-like 2	3	3	1	0.0122076	79.148	VTYDYEK(1)K	2	-0.32513	1	1	0.00234044	101.65	VTYDYEK(1)K	2	-0.92143	1	1	0.00553859	90.15	VTYDYEK(1)K	2	-0.36907	1	1.192	1.237	1.164	0.933	0.957	1.011	0.799	0.706	0.723	1.126	1.133	1.152	0.97	0.959	0.981	0.815	0.833	0.835	1.05861	1.09179	1.01042	0.961856	0.997914
CSA016957.1	89	K	ATP synthase F1 subunit 1 (mitochondrion)	3	3	1	5.60205e-05	101.32	K(1)SVHEPMQTGLK	3	-0.51925	1	1	0.000888761	74.475	K(1)SVHEPMQTGLK	3	0.02622	1	1	4.54951e-06	115.12	K(1)SVHEPMQTGLK	3	-0.59783	1	0.936	0.963	0.962	1.189	1.237	1.146	0.982	0.878	0.966	0.329	0.302	0.366	0.741	0.744	0.782	2.147	2.242	2.182	2.84498	3.18874	2.62842	1.60459	1.66263
CSA016957.1	124	K	ATP synthase F1 subunit 1 (mitochondrion)	3	3	1	2.12485e-18	133.96	QTGK(1)TAIAIDTILNQK	3	-1.3758	1	1	2.77363e-18	139.29	QTGK(1)TAIAIDTILNQK	3	0.8212	1	1	1.46569e-15	151.73	QTGK(1)TAIAIDTILNQK	3	2.5011	1	1.02	1.103	1.088	0.97	1.106	1.054	1.088	0.776	0.826	0.329	0.302	0.366	0.741	0.744	0.782	2.147	2.242	2.182	3.1003	3.65232	2.97268	1.30904	1.48656
CSA016957.1	331	K	ATP synthase F1 subunit 1 (mitochondrion)	3	3	1	7.5425e-05	127.56	VGSAAQLK(1)AMK	2	-1.1998	5	1	2.85516e-09	146.36	VGSAAQLK(1)AMK	2	-1.174	7	1	0.00032707	134.99	VGSAAQLK(1)AMK	2	-1.3286	5	0.67	0.55	0.489	0.875	0.834	0.8	1.88	2.095	2.385	0.329	0.302	0.366	0.741	0.744	0.782	2.147	2.242	2.182	2.03647	1.82119	1.33607	1.18084	1.12097
CSA017090.1	126	K	probable zinc metallopeptidase EGY3, chloroplastic isoform X1	3	3	1	0.0115628	89.355	TDEEFK(1)K	2	-0.79798	1	1	0.0132894	89.355	TDEEFK(1)K	2	-0.20509	1	1	0.0128424	89.355	TDEEFK(1)K	2	-0.0018751	1	0.649	0.658	0.636	1.145	1.095	1.075	1.59	1.599	1.733	0.592	0.557	0.553	0.954	0.964	0.977	1.661	1.712	1.653	1.09628	1.18133	1.15009	1.20021	1.13589
CSA017092.1	180	K	bifunctional dTDP-4-dehydrorhamnose 3,5-epimerase/dTDP-4-dehydrorhamnose reductase	3	3	1	0.0288934	79.148	NFITK(1)ITR	2	0.27425	1	1	0.0174841	81.525	NFITK(1)ITR	2	1.2098	1	1	0.00530836	96.143	NFITK(1)ITR	2	0.82106	1	1.422	1.262	1.24	0.858	0.87	0.916	0.445	0.761	0.689	1.683	1.538	1.732	0.669	0.765	0.687	0.411	0.51	0.345	0.84492	0.820546	0.715935	1.28251	1.13725
CSA017131.1	284	K	uncharacterized protein LOC109001851 isoform X1	3	3	1	0.00560694	77.058	GIFVK(1)HFK	3	0.37664	1	1	0.0378368	47.082	GIFVK(1)HFK	3	-0.01387	1	1	0.01016	67.981	GIFVK(1)HFK	3	-0.42083	2	1.071	0.811	0.921	1.172	0.962	1.068	0.744	1.473	1.153	1.103	1.07	1.107	1.024	1.093	1.034	0.716	0.748	0.772	0.970988	0.757944	0.831978	1.14453	0.880146
CSA017190.1	77	K	acyl carrier protein 1, chloroplastic-like	3	3	1	0.00010511	117.2	VETVDK(1)VCEIVR	3	-1.4137	2	1	3.40673e-06	120.29	VETVDK(1)VCEIVR	3	-0.27778	2	1	0.00208653	82.069	VETVDK(1)VCEIVR	2	-0.63033	1	1.138	1.072	0.982	0.974	0.948	0.985	0.853	1.016	1.132	1.043	1.069	1.102	1.021	1.116	1.024	0.918	0.78	0.833	1.09108	1.00281	0.891107	0.953967	0.849462
CSA017233.1	398	K	mitochondrial import inner membrane translocase subunit TIM44-2	3	3	1	0.00275812	101.65	GDVEVLK(1)K	2	0.055144	1	1	0.00234044	101.65	GDVEVLK(1)K	2	-0.032688	1	1	0.0021274	101.65	GDVEVLK(1)K	2	0.47028	1	1.238	1.229	1.235	0.913	0.933	0.901	0.734	0.748	0.718	1.117	1.153	1.124	0.994	0.987	0.976	0.825	0.822	0.851	1.10833	1.06592	1.09875	0.918511	0.945289
CSA017234.1	225	K	transmembrane 9 superfamily member 10-like	3	3	1	0.000161819	125.3	LTTCDPHAK(1)R	2	0.57486	2	1	8.1034e-09	152.69	LTTCDPHAK(1)R	2	0.34633	2	1	1.20542e-09	164.31	LTTCDPHAK(1)R	2	0.48085	2	1.238	1.301	1.263	0.905	0.933	0.925	0.744	0.618	0.63	1.209	1.159	1.156	0.943	1.121	0.996	0.771	0.732	0.722	1.02399	1.12252	1.09256	0.959703	0.832293
CSA017237.1	23	K	60S ribosomal protein L31	3	3	1	0.000187737	125.74	EYTLNLHK(1)R	3	0.015081	4	1	0.000469767	112.11	EYTLNLHK(1)R	3	-0.090816	2	1	4.2021e-07	128.81	EYTLNLHK(1)R	3	0.34736	6	1.62	1.009	1.279	0.507	0.905	0.689	0.491	1.179	0.898	1.907	1.917	2.09	0.442	0.447	0.315	0.347	0.328	0.232	0.849502	0.526343	0.611962	1.14706	2.02461
CSA017401.1	108	K	tyrosine--tRNA ligase 1, cytoplasmic	3	3	1	4.10078e-06	135.55	ALNK(1)ILQPVR	2	-1.0128	2	1	0.00133105	114.4	ALNK(1)ILQPVR	2	0.96207	2	1	0.000828326	123.75	ALNK(1)ILQPVR	2	0.50658	2	1.001	1.116	1.137	0.877	0.942	0.978	1.236	0.944	0.821
CSA017430.1	242	K	chloroplast stem-loop binding protein of 41 kDa a, chloroplastic-like	3	3	1	9.97402e-05	130.75	AVGIDAK(1)K	2	0.59692	9	1	0.000349234	130.75	AVGIDAK(1)K	2	0.65906	8	1	0.00118852	105.52	AVGIDAK(1)K	2	-1.496	7	0.434	0.393	0.294	0.71	0.714	0.717	2.537	2.52	2.892	0.448	0.488	0.432	0.984	0.959	0.961	1.746	1.718	1.791	0.96875	0.805328	0.680556	0.721545	0.744526
CSA017430.1	293	K	chloroplast stem-loop binding protein of 41 kDa a, chloroplastic-like	3	3	0.934492	0.00249961	73.881	K(0.066)PMK(0.934)FEIDDK	3	-0.36286	1	0.968126	0.0015615	96.745	K(0.032)PMK(0.968)FEIDDK	3	0.15656	1	0.991535	0.000902768	94.122	K(0.008)PMK(0.992)FEIDDK	3	-1.2162	2	0.454	0.369	0.262	0.828	0.776	0.763	2.355	2.493	2.9	0.448	0.488	0.432	0.984	0.959	0.961	1.746	1.718	1.791	1.01339	0.756148	0.606481	0.841463	0.809176
CSA017432.1	514	K	vesicle-fusing ATPase-like	3	3	1	0.00283207	91.626	HDHIYK(1)R	3	-1.5597	1	1	0.000973323	104.21	HDHIYK(1)R	3	-0.32688	1	1	0.000539298	135.84	HDHIYK(1)R	2	0.13569	2	1.274	1.24	1.212	1.049	1.054	1.053	0.501	0.588	0.57	1.13	1.075	1.097	1.009	1.003	1.029	0.8	0.851	0.813	1.12743	1.15349	1.10483	1.03964	1.05085
CSA017471.1	120	K	allene oxide cyclase 4, chloroplastic	3	3	1	0.00134879	96.143	VYTGDLQK(1)R	2	-0.7619	2	1	2.92071e-09	158.85	VYTGDLQK(1)R	2	-0.20155	1	1	0.031223	59.067	VYTGDLQK(1)R	2	-1.0403	1	1.012	1.196	1.208	1	0.919	0.83	1.066	0.825	0.866	1.294	1.231	1.319	0.914	0.906	0.927	0.686	0.783	0.638	0.782071	0.971568	0.915845	1.09409	1.01435
CSA017473.1	36	K	putative phosphatidylglycerol/phosphatidylinositol transfer protein DDB_G0282179	3	3	1	0.00597964	97.431	K(1)TNYVVK	2	0.78105	2	1	0.0188449	85.676	K(1)TNYVVK	2	0.7834	1	1	0.00782723	97.431	K(1)TNYVVK	2	1.528	3	0.939	0.961	0.924	1.29	1.182	1.228	0.854	0.944	0.942	0.892	0.897	0.845	1.286	1.263	1.262	0.891	0.938	0.923	1.05269	1.07135	1.09349	1.00311	0.935867
CSA017504.1	30	K	citrate synthase, mitochondrial	3	1	1	0.0301177	58.596	LK(1)SEHGK	3	-1.1048	1	1	0.0368701	52.937	LK(1)SEHGK	3	-1.5634	1	1	0.00990976	78.77	LK(1)SEHGK	3	-1.0299	1			0.734			0.971			1.662	0.892	0.939	0.955	1.03	1.04	1.026	1.09	1.033	1.045			0.768586
CSA017504.1	81	K	citrate synthase, mitochondrial	3	3	1	0.000779527	89.44	NLSIPECQK(1)K	3	-0.67292	2	1	0.000376842	110.39	NLSIPECQK(1)K	3	-2.1534	1	1	0.00119445	93.623	NLSIPECQK(1)K	2	-0.46437	2	1.117	1.105	1.049	0.961	0.981	0.975	0.912	0.917	1.007	0.892	0.939	0.955	1.03	1.04	1.026	1.09	1.033	1.045	1.25224	1.17678	1.09843	0.93301	0.943269
CSA017522.1	856	K	alpha-xylosidase 1-like	3	3	1	9.52645e-07	142.43	GLELPVGK(1)K	2	-0.43899	1	1	0.00259443	101.97	GLELPVGK(1)K	2	-0.072281	2	1	0.000686666	117.7	GLELPVGK(1)K	2	-0.52522	1	1.043	1.113	1.03	1.444	1.377	1.426	0.464	0.444	0.471	0.995	1.017	1.002	1.368	1.359	1.357	0.624	0.575	0.642	1.04824	1.0944	1.02794	1.05556	1.01325
CSA017525.1	24	K	glucose-6-phosphate isomerase, cytosolic	3	3	1	0.000174768	128.36	AHVDDIK(1)K	2	0.62565	2	1	0.000422652	128.36	AHVDDIK(1)K	2	-0.5665	2	1	0.000287433	128.36	AHVDDIK(1)K	3	-0.058861	2	0.899	0.954	0.894	1.262	1.227	1.227	0.966	0.906	1.005	0.878	0.861	0.868	1.143	1.189	1.155	1.044	1.024	1.04	1.02392	1.10801	1.02995	1.10411	1.03196
CSA017546.1	96	K	alcohol dehydrogenase-like	3	3	1	0.0058625	65.056	GVMIHDQK(1)SR	3	0.30271	1	1	0.013349	55.721	GVMIHDQK(1)SR	3	0.014623	2	1	0.00044853	133.89	GVMIHDQK(1)SR	2	1.1305	3	1.091	1.012	1.17	0.802	0.82	0.679	1.154	1.274	1.136	1.305	1.306	1.31	0.698	0.663	0.672	0.904	0.916	0.905	0.836015	0.774885	0.89313	1.149	1.2368
CSA017558.1	156	K	thioredoxin family protein	3	2	1	0.00682653	94.114	LAPEWK(1)K	2	0.57779	1	1	0.00305389	106.04	LAPEWK(1)K	2	-0.69724	1	1	0.00442005	106.04	LAPEWK(1)K	2	0.8529	1	1.288		1.319	0.995		1.003	0.539		0.414	1.339	1.323	1.388	0.914	0.921	0.907	0.551	0.616	0.55	0.961912		0.950288	1.08862
CSA017603.1	293	K	beta-galactosidase-like	3	0	1	1.99023e-18	107.99	SCSELNK(1)SNVLFK	3	0.66827	1	1	2.70943e-10	101.32	SCSELNK(1)SNVLFK	3	-0.25062	1	1	0.000958107	68.277	SCSELNK(1)SNVLFK	3	0.65919	1										0.844	0.826	0.82	1.04	1.023	1.05	1.125	1.169	1.127
CSA017616.1	161	K	malate dehydrogenase	3	3	1	0.00230419	60.246	NAPNIPAK(1)NFHALTR	3	-0.78069	2	1	1.30465e-08	107.5	NAPNIPAK(1)NFHALTR	3	0.26163	2	1	3.54634e-10	102.15	NAPNIPAK(1)NFHALTR	3	-0.25423	2	0.825	0.851	0.829	1.116	1.124	1.167	1.286	1.213	1.214	0.61	0.521	0.585	1.2	1.215	1.223	1.316	1.374	1.364	1.35246	1.6334	1.41709	0.93	0.925103
CSA017616.1	323	K	malate dehydrogenase	3	3	1	8.25488e-12	153.14	VTK(1)SEAELLAEK	2	1.6406	2	1	5.23786e-07	130.72	VTK(1)SEAELLAEK	2	-0.83968	2	1	0.00489031	60.549	RVTK(1)SEAELLAEK	3	-0.92223	1	0.507	0.578	0.711	1.154	1.097	1.138	1.856	1.738	1.496	0.61	0.521	0.585	1.2	1.215	1.223	1.316	1.374	1.364	0.831148	1.1094	1.21538	0.961667	0.902881
CSA017664.1	165	K	peptidyl-prolyl cis-trans isomerase CYP19-4	3	3	1	0.00343784	101.38	FADENFK(1)LK	2	-0.7393	1	1	0.000878418	123.75	FADENFK(1)LK	2	1.0662	2	1	0.00107936	112.36	FADENFK(1)LK	3	-0.19428	3	1.154	1.313	1.266	1.184	0.996	0.97	0.566	0.523	0.567	1.152	1.18	1.185	1.063	1.076	1.072	0.694	0.656	0.639	1.00174	1.11271	1.06835	1.11383	0.925651
CSA017698.1	206	K	guanosine nucleotide diphosphate dissociation inhibitor 2 isoform X2	3	3	1	3.00079e-08	103.88	DDHYLDEPALDTVK(1)R	3	0.10314	1	1	5.65712e-11	129.38	DDHYLDEPALDTVK(1)R	3	1.3556	1	1	1.46473e-12	119.54	DDHYLDEPALDTVK(1)R	3	1.1408	1	1.016	0.93	0.876	1.087	1.033	0.964	0.952	1.175	1.376	1.204	1.234	1.203	0.977	0.972	0.968	0.747	0.713	0.731	0.843854	0.753647	0.72818	1.11259	1.06276
CSA017698.1	291	K	guanosine nucleotide diphosphate dissociation inhibitor 2 isoform X2	3	2	1	2.44494e-19	164.48	VVCDPSYLPNK(1)AR	2	0.56178	3	0.999997	0.00544484	62.69	KVVCDPSYLPNK(1)AR	3	0.23235	1	1	6.46992e-23	194.06	VVCDPSYLPNK(1)AR	2	0.60001	3	1.278		1.214	0.957		0.895	0.604		0.77	1.204	1.234	1.203	0.977	0.972	0.968	0.747	0.713	0.731	1.06146		1.00914	0.979529
CSA017753.1	287	K	Cytosolic enolase 3	3	3	1	0.00239457	101.43	TPNK(1)SEQNFR	2	-1.1305	1	1	0.0245675	65.842	TPNK(1)SEQNFR	2	-0.3069	1	1	0.000880919	122.33	TPNK(1)SEQNFR	2	-0.86712	1	1.091	1.113	1.044	1.044	1.04	1.12	0.86	0.833	0.833	1.072	1.075	1.106	1.053	1.067	1.072	0.801	0.841	0.767	1.01772	1.03535	0.943942	0.991453	0.974695
CSA017761.1	13	K	sugar transport protein 14-like	3	3	1	6.4084e-05	93.649	AGAVIGDAGAGK(1)R	3	1.5321	2	1	0.00351947	61.235	AGAVIGDAGAGK(1)R	3	1.1143	1	1	0.000199372	75.088	AGAVIGDAGAGK(1)R	3	-0.18312	1	0.791	0.99	0.814	1.176	0.991	1.237	1.279	1.116	1.156	0.545			1.336			1.267			1.45138			0.88024
CSA017776.1	107	K	glucose-1-phosphate adenylyltransferase small subunit, chloroplastic/amyloplastic	3	3	1	0.00339283	107.9	LYPLTK(1)K	2	0.56069	1	1	0.00312075	107.9	LYPLTK(1)K	2	1.3853	1	1	0.00207606	119.29	LYPLTK(1)K	2	0.49663	2	0.625	0.72	0.605	1.119	1.028	1.084	1.669	1.561	1.783	0.573	0.596	0.613	0.905	0.894	0.903	1.645	1.681	1.594	1.09075	1.20805	0.986949	1.23646	1.14989
CSA017776.1	461	K	glucose-1-phosphate adenylyltransferase small subunit, chloroplastic/amyloplastic	3	1	1	2.38643e-08	108.66	GSIPIGIGK(1)NSHIK	3	-0.19112	1	1	0.0129196	50.102	GSIPIGIGK(1)NSHIK	3	0.57942	1	1	2.75238e-07	104.94	GSIPIGIGK(1)NSHIK	3	1.4425	1	0.696			0.957			1.73			0.573	0.596	0.613	0.905	0.894	0.903	1.645	1.681	1.594	1.21466			1.05746
CSA017787.1	83	K	protein THYLAKOID FORMATION1, chloroplastic	3	3	1	0.0016358	92.051	LNFLNAYK(1)R	2	-0.83397	1	1	0.00209331	109.29	LNFLNAYK(1)R	2	-2.4542	1	1	1.96212e-06	146.79	LNFLNAYK(1)R	2	-2.0924	1	0.684	0.791	0.731	1.152	1.187	1.369	1.515	1.248	1.156	0.658	0.553	0.566	1.061	1.111	1.085	1.445	1.499	1.505	1.03951	1.43038	1.29152	1.08577	1.06841
CSA017796.1	54	K	uncharacterized protein LOC109279843 precursor	3	3	1	0.0405765	84.743	LCCSK(1)IK	2	-2.755	1	1	0.0347026	82.279	LCCSK(1)IK	2	-2.6878	1	1	0.036637	79.474	LCCSK(1)IK	2	-2.1457	1	0.254	0.237	0.317	0.387	0.321	0.364	3.278	3.261	3.296	0.166	0.225	0.207	0.218	0.243	0.267	2.999	2.89	2.887	1.53012	1.05333	1.5314	1.77523	1.32099
CSA017796.1	93	K	uncharacterized protein LOC109279843 precursor	3	3	1	0.000481135	89.231	KVATTCGVPIPK(1)C	2	0.76716	2	1	0.00274231	84.297	VATTCGVPIPK(1)C	2	-1.4288	2	1	0.000655866	90.913	VATTCGVPIPK(1)C	2	-2.5196	3	0.404	0.419	0.449	0.563	0.608	0.619	2.775	2.596	2.7	0.166	0.225	0.207	0.218	0.243	0.267	2.999	2.89	2.887	2.43373	1.86222	2.16908	2.58257	2.50206
CSA017800.1	693	K	pentatricopeptide repeat-containing protein At4g16390, chloroplastic	3	3	1	0.00205653	111.26	VAAK(1)SWLESR	2	-0.99326	1	1	0.00863691	76.326	VAAK(1)SWLESR	2	0.51554	1	1	0.0047244	82.85	VAAK(1)SWLESR	2	0.22544	1	0.848	0.861	0.849	1.502	1.409	1.404	0.772	0.86	0.87	0.811	0.833	0.856	1.475	1.481	1.465	0.585	0.644	0.675	1.04562	1.03361	0.991822	1.01831	0.951384
CSA017806.1	43	K	dnaJ protein ERDJ3B-like	3	3	1	6.66192e-05	130.98	GAADEQIK(1)R	2	1.6567	2	1	9.13571e-23	142.83	GAADEQIK(1)R	2	0.37597	2	1	0.000451088	123.79	GAADEQIK(1)R	2	1.4855	2	1.253	1.324	1.237	0.971	1.005	0.939	0.635	0.49	0.665	1.231	1.31	1.234	0.952	0.92	0.929	0.741	0.705	0.743	1.01787	1.01069	1.00243	1.01996	1.09239
CSA017891.1	279	K	glyoxysomal fatty acid beta-oxidation multifunctional protein MFP-a	3	3	1	0.0170653	73.877	GTTK(1)VPGITDR	2	0.61994	1	1	0.00202074	95.264	GTTK(1)VPGITDR	2	0.54014	1	1	0.0276924	60.345	GTTK(1)VPGITDR	2	1.4598	1	0.997	1.086	1.012	0.954	0.904	0.916	1.151	1.041	1.16	1.049	1.045	1.031	0.96	0.953	0.96	0.983	1.008	0.985	0.950429	1.03923	0.981571	0.99375	0.948583
CSA017933.1	120	K	proteasome subunit alpha type-2-A	3	2	1	0.00115986	106.58	NVSNAK(1)TFLEK	2	2.9985	1	1	8.68269e-27	139.86	NVSNAK(1)TFLEK	2	2.5659	1	1	0.00038959	132.97	NVSNAK(1)TFLEK	2	0.93365	2	1.33		1.225	0.998		1.003	0.453		0.608	1.102	1.072	1.113	1.043	1.036	1.054	0.828	0.853	0.79	1.2069		1.10063	0.956855
CSA017990.1	169	K	40S ribosomal protein S6	3	3	1	0.00355969	112.11	TFTTK(1)SGK	2	-1.4197	1	1	0.0148376	84.054	TFTTK(1)SGK	2	-0.79168	1	1	0.00592695	94.692	TFTTK(1)SGK	2	-0.055327	1	1.803	1.857	1.84	0.372	0.355	0.319	0.3	0.279	0.216
CSA018004.1	476	K	cellulose synthase A catalytic subunit 1	3	1	1	0.0259475	58.981	K(1)HSIEPR	3	1.4278	1	1	0.00686269	81.215	K(1)HSIEPR	3	2.1081	1	1	0.0267353	54.776	K(1)HSIEPR	3	0.93947	1		1.147			0.771			1.085		1.408	1.258	1.278	0.903	0.896	0.944	0.54	0.755	0.675		0.911765			0.860491
CSA018005.1	13	K	uncharacterized protein At2g34160-like	3	3	1	0.000373366	91.701	SINISESHK(1)R	3	1.7789	1	1	0.000686544	91.701	SINISESHK(1)R	3	0.88156	1	1	0.00013679	104.82	SINISESHK(1)R	3	1.9696	1	0.93	0.968	0.878	0.915	0.95	1.015	1.328	1.202	1.309	0.856	0.818	0.856	1.119	1.132	1.032	1.044	1.108	1.129	1.08645	1.18337	1.0257	0.817694	0.839223
CSA018092.1	55	K	glutamate-1-semialdehyde 2,1-aminomutase 2, chloroplastic	3	3	1	7.6943e-07	142.1	K(1)SEQAFNIAK	2	0.69376	4	1	9.46982e-06	136.53	K(1)SEQAFNIAK	2	1.2259	1	1	1.1843e-09	164.48	K(1)SEQAFNIAK	3	0.92876	2	0.915	0.914	0.888	1.252	1.483	1.349	0.946	0.68	0.861	0.835	0.812	0.822	1.279	1.282	1.269	0.913	0.946	0.967	1.09581	1.12562	1.08029	0.97889	1.15679
CSA018092.1	79	K	glutamate-1-semialdehyde 2,1-aminomutase 2, chloroplastic	3	3	1	8.97367e-10	103.13	AFK(1)SVGGQPIIMDSVK	3	-1.7043	1	1	5.38182e-13	112.34	AFK(1)SVGGQPIIMDSVK	3	-1.4202	1	1	1.3446e-10	103.13	AFK(1)SVGGQPIIMDSVK	3	-1.7379	1	0.905	0.92	0.94	1.325	1.278	1.125	0.878	0.909	1.039	0.835	0.812	0.822	1.279	1.282	1.269	0.913	0.946	0.967	1.08383	1.133	1.14355	1.03597	0.99688
CSA018101.1	494	K	probable nucleoredoxin 1	3	3	1	0.0192584	67.032	GWPEK(1)LK	3	0.92666	1	1	0.00556975	103.74	GWPEK(1)LK	2	-1.8099	1	1	0.016502	91.318	GWPEK(1)LK	2	-0.21896	1	0.747	0.599	0.571	1.719	1.972	1.753	0.701	0.684	0.997	0.664	0.649	0.674	1.714	1.738	1.723	0.648	0.655	0.669	1.125	0.922958	0.847181	1.00292	1.13464
CSA018101.1	496	K	probable nucleoredoxin 1	3	3	1	9.63247e-08	122.33	LK(1)HELHVEHELTR	5	-0.39713	2	1	1.6169e-10	144.88	LK(1)HELHVEHELTR	4	0.43492	2	1	3.31995e-07	141.85	LK(1)HELHVEHELTR	3	1.8055	3	0.625	0.685	0.764	1.343	1.776	1.617	1.396	0.755	0.773	0.664	0.649	0.674	1.714	1.738	1.723	0.648	0.655	0.669	0.941265	1.05547	1.13353	0.783547	1.02186
CSA018101.1	539	K	probable nucleoredoxin 1	3	3	1	0.000172279	81.565	VCDFDLHPK(1)CALK	3	-0.92884	1	1	0.000363941	77.185	VCDFDLHPK(1)CALK	3	-1.512	1	1	0.000245767	75.088	VCDFDLHPK(1)CALK	3	0.13891	1	0.758	0.796	0.799	1.899	1.623	1.526	0.461	0.732	0.818	0.664	0.649	0.674	1.714	1.738	1.723	0.648	0.655	0.669	1.14157	1.2265	1.18546	1.10793	0.933832
CSA018167.1	119	K	presequence protease 1, chloroplastic/mitochondrial-like isoform X1	3	3	1	3.08271e-05	124.51	VSEEFIEECK(1)SR	2	-0.58802	1	1	7.75795e-09	141.73	VSEEFIEECK(1)SR	2	0.42836	1	1	2.33375e-05	114.7	VSEEFIEECK(1)SR	2	0.039706	1	0.602	0.687	0.613	1.911	1.795	1.763	0.748	0.729	0.898	0.605	0.589	0.601	1.406	1.476	1.46	1.039	1.033	1.014	0.995041	1.16638	1.01997	1.35917	1.21612
CSA018167.1	126	K	presequence protease 1, chloroplastic/mitochondrial-like isoform X1	3	3	1	0.0277313	60.358	AVLYK(1)HK	3	-1.7159	1	1	0.0250277	60.788	AVLYK(1)HK	3	-1.3347	1	1	0.0131823	73.039	AVLYK(1)HK	3	-1.9864	2	0.776	0.823	0.728	1.58	1.437	1.59	0.815	0.898	0.88	0.605	0.589	0.601	1.406	1.476	1.46	1.039	1.033	1.014	1.28264	1.39728	1.21131	1.12376	0.973577
CSA018167.1	383	K	presequence protease 1, chloroplastic/mitochondrial-like isoform X1	3	3	1	8.31667e-05	119.74	YPAAEGGDLK(1)K	3	-0.98805	3	1	4.40842e-05	127.17	YPAAEGGDLK(1)K	2	-1.7517	2	1	0.000340623	127.17	YPAAEGGDLK(1)K	2	-1.3264	3	0.61	0.628	0.589	1.697	1.696	1.757	0.993	0.95	0.955	0.605	0.589	0.601	1.406	1.476	1.46	1.039	1.033	1.014	1.00826	1.06621	0.980033	1.20697	1.14905
CSA018167.1	538	K	presequence protease 1, chloroplastic/mitochondrial-like isoform X1	3	3	0.999985	0.00315306	67.997	YQKPLMELK(1)AR	3	-0.4813	2	0.999997	0.00503516	71.888	YQKPLMELK(1)AR	3	0.99554	2	0.999996	0.00378491	75.739	YQKPLMELK(1)AR	3	-0.98334	2	0.673	0.687	0.616	1.599	1.542	1.662	0.993	1.024	1.02	0.605	0.589	0.601	1.406	1.476	1.46	1.039	1.033	1.014	1.1124	1.16638	1.02496	1.13727	1.04472
CSA018167.1	763	K	presequence protease 1, chloroplastic/mitochondrial-like isoform X1	3	3	1	6.79981e-06	128.95	ILQDVQFTDQK(1)R	2	0.11867	2	1	9.29687e-09	138.55	ILQDVQFTDQK(1)R	2	-0.24012	1	1	1.61113e-05	122.97	ILQDVQFTDQK(1)R	2	-0.28739	1	0.694	0.496	0.534	1.581	1.918	1.801	0.973	0.934	1.011	0.605	0.589	0.601	1.406	1.476	1.46	1.039	1.033	1.014	1.14711	0.842105	0.888519	1.12447	1.29946
CSA018167.1	773	K	presequence protease 1, chloroplastic/mitochondrial-like isoform X1	3	3	1	8.11178e-10	152.54	QFVSQSK(1)AR	2	2.3203	2	1	3.40762e-13	172.27	QFVSQSK(1)AR	2	-0.3706	2	1	3.24474e-10	167.09	QFVSQSK(1)AR	2	0.70544	2	0.73	0.776	0.704	1.513	1.472	1.537	0.987	0.943	0.999	0.605	0.589	0.601	1.406	1.476	1.46	1.039	1.033	1.014	1.20661	1.31749	1.17138	1.0761	0.99729
CSA018265.1	86	K	60S ribosomal export protein NMD3	3	2	1	0.00121166	110.38	ELLTFCVK(1)R	2	-2.6516	1	1	0.000249067	85.622	ELLTFCVK(1)R	2	-3.4379	1	1	0.000627695	119.22	ELLTFCVK(1)R	2	-1.9677	1	1.181		1.329	1.001		0.88	0.737		0.552	1.269	1.349	1.404	0.942	0.912	0.941	0.656	0.63	0.589	0.930654		0.946581	1.06263
CSA018282.1	13	K	L-ascorbate peroxidase 1, cytosolic isoform X2	3	3	1	2.84043e-17	170.04	CYPTVSEEYK(1)K	2	-2.1197	2	1	1.69977e-09	148.18	CYPTVSEEYK(1)K	2	-0.5482	2	1	1.63339e-09	160.52	CYPTVSEEYK(1)K	2	-1.046	2	1.338	1.41	1.349	0.835	0.816	0.825	0.636	0.556	0.58	1.377	1.378	1.399	0.919	0.905	0.908	0.552	0.583	0.552	0.971678	1.02322	0.96426	0.908596	0.901657
CSA018288.1	101	K	2-Cys peroxiredoxin BAS1, chloroplastic	3	3	1	0.00362902	105.46	VK(1)LSEYIGK	2	-2.4115	1	1	0.00175414	116.55	VK(1)LSEYIGK	2	-1.7346	1	1	0.0010381	116.55	VK(1)LSEYIGK	2	-1.805	1	0.716	0.714	0.676	1.103	1.094	1.115	1.512	1.497	1.596	0.542	0.592	0.607	0.994	0.995	0.988	1.647	1.575	1.521	1.32103	1.20608	1.11367	1.10966	1.0995
CSA018288.1	108	K	2-Cys peroxiredoxin BAS1, chloroplastic	3	3	1	0.00136215	113.18	LSEYIGK(1)K	2	0.16172	8	1	0.000895503	115.71	LSEYIGK(1)K	2	0.26946	7	1	0.00195195	103.55	LSEYIGK(1)K	3	-0.76827	7	0.564	0.571	0.535	1.093	1.098	1.097	1.819	1.751	1.911	0.542	0.592	0.607	0.994	0.995	0.988	1.647	1.575	1.521	1.04059	0.964527	0.881384	1.0996	1.10352
CSA018288.1	165	K	2-Cys peroxiredoxin BAS1, chloroplastic	3	3	1	0.000296602	121.02	K(1)SGGLGDLK	2	0.7378	1	1	0.00292794	89.301	K(1)SGGLGDLK	2	0.88515	1	1	0.00527676	78.903	K(1)SGGLGDLK	2	0.23298	2	0.554	0.597	0.638	1.23	1.196	1.124	1.672	1.589	1.663	0.542	0.592	0.607	0.994	0.995	0.988	1.647	1.575	1.521	1.02214	1.00845	1.05107	1.23742	1.20201
CSA018358.1	76	K	26S protease regulatory subunit 6B homolog	3	3	1	0.00647227	95.502	AQEEVK(1)R	2	3.8451	1	1	0.0353586	76.1	AQEEVK(1)R	2	2.09	1	1	0.00181566	121.67	AQEEVK(1)R	2	1.262	1	1.214	1.179	1.134	0.995	0.951	1.025	0.68	0.817	0.765	1.261	1.323	1.138	0.772	0.931	0.929	0.884	0.627	0.886	0.962728	0.891156	0.996485	1.28886	1.02148
CSA018428.1	138	K	histone H2A	3	3	1	0.00399133	105.65	SPTK(1)AAK(1)SPK	2	0.92144	1	1	0.0026584	104.17	SPTK(1)AAK(1)SPK	2	1.026	1	1	0.0014902	97.463	SPTK(1)AAK(1)SPK	2	0.72042	2	0.707	0.758	0.726	1.276	1.237	1.298	1.32	1.251	1.259	1.532		1.448	0.546		0.707	0.753		0.697	0.461488		0.501381	2.337
CSA018428.1	141	K	histone H2A	3	3	1	0.00399133	105.65	SPTK(1)AAK(1)SPK	2	0.92144	1	1	0.0026584	104.17	SPTK(1)AAK(1)SPK	2	1.026	1	1	0.0014902	97.463	SPTK(1)AAK(1)SPK	2	0.72042	2	0.707	0.758	0.726	1.276	1.237	1.298	1.32	1.251	1.259	1.532		1.448	0.546		0.707	0.753		0.697	0.461488		0.501381	2.337
CSA018562.1	299	K	3-isopropylmalate dehydrogenase, chloroplastic-like	3	3	1	2.89525e-07	145.84	IAFETAQK(1)R	2	-1.3219	1	1	0.000160593	130.66	IAFETAQK(1)R	2	-2.0882	1	1	0.000768638	109.44	IAFETAQK(1)R	2	-1.5969	1	1.08	1.109	1.094	1.167	1.124	1.112	0.73	0.742	0.74	0.927	0.952	0.952	1.079	1.065	1.061	0.971	0.976	0.98	1.16505	1.16492	1.14916	1.08156	1.0554
CSA018611.1	13	K	mitochondrial outer membrane protein porin 2-like	3	3	1	0.000238697	114.72	GPGLFSDISK(1)K	2	-0.54224	1	1	3.11908e-05	128.85	GPGLFSDISK(1)K	2	0.85014	1	1	0.000364803	114.72	GPGLFSDISK(1)K	3	-0.40297	2	0.734	0.758	0.695	1.111	0.998	1.175	1.468	1.528	1.481	0.993	1.037	0.995	1.041	1.058	1.077	0.958	0.897	0.917	0.739174	0.730955	0.698492	1.06724	0.943289
CSA018687.1	705	K	cell division cycle protein 48 homolog	3	3	1	3.05774e-10	157.75	FQIFK(1)SCLR	2	-1.7968	2	1	1.18496e-24	192.12	FQIFK(1)SCLR	2	-2.6094	1	1	2.65363e-06	147.41	FQIFK(1)SCLR	2	-0.36286	1	1.303	1.282	1.364	0.994	1.004	1.02	0.509	0.569	0.303	1.151	1.066	1.109	1.094	1.079	1.046	0.713	0.797	0.743	1.13206	1.20263	1.22994	0.908592	0.930491
CSA018701.1	95	K	profilin-1	3	2	0.999996	0.00143682	63.32	KGPGGVTIK(1)K	3	-0.10157	1	1	0.00267393	94.692	GPGGVTIK(1)K	2	-1.159	2	1	0.00103926	83.862	GPGGVTIK(1)K	2	-1.5481	2		1.305	1.365		1.005	0.906		0.524	0.443		0.89			1.004			1.147			1.46629			1.001
CSA018705.1	607	K	pentatricopeptide repeat-containing protein At1g09900	3	3	1	0.00013575	128.57	FFHDLK(1)R	3	-0.76811	1	1	0.000973323	110.31	FFHDLK(1)R	2	0.83953	2	1	0.000577035	120.62	FFHDLK(1)R	3	-0.53736	1	1.005	0.97	0.971	1.447	1.322	1.323	0.535	0.766	0.723	0.933	1.026		1.138	1.046		0.994	0.914		1.07717	0.945419		1.27153	1.26386
CSA018716.1	260	K	U3 small nucleolar RNA-associated protein 4	3	3	1	7.78873e-08	139.86	SGVGK(1)SAWTVNKR	3	1.279	3	1	1.14435e-16	160.84	SGVGK(1)SAWTVNK	2	0.86063	1	1	2.7305e-10	161.21	SGVGK(1)SAWTVNK	3	-1.0832	2	1.466	1.602	1.533	0.73	0.651	0.669	0.518	0.4	0.402
CSA018830.1	40	K	60S ribosomal protein L14-2	3	3	1	0.00700172	93.429	TQMNFK(1)R	2	-1.8979	1	1	0.00342651	116.37	TQMNFK(1)R	2	-1.2338	1	1	0.00460004	105.14	TQMNFK(1)R	2	-1.1536	1	1.093	1.077	1.132	1.074	1.128	1.109	0.819	0.797	0.665	0.763	1.528		1.512	1.029		0.776	0.239		1.4325	0.704843		0.710317	1.09621
CSA018901.1	96	K	40S ribosomal protein S14-3	3	2	1	8.30576e-05	94.402	ELGINALHIK(1)LR	3	0.63398	2	1	0.0012001	72.705	ELGINALHIK(1)LR	3	-1.5148	1	1	0.000736217	77.74	ELGINALHIK(1)LR	3	0.10204	1	1.187		1.417	1.045		1.025	0.672		0.184	1.313	1.212	1.5	1.013	0.949	0.995	0.552	0.733	0.315	0.904037		0.944667	1.03159
CSA018927.1	270	K	uncharacterized protein LOC100263834	3	3	1	3.04751e-06	105.66	AVAHFPTAVK(1)EFK	3	-0.38021	1	1	6.82099e-05	89.43	AVAHFPTAVK(1)EFK	3	-1.1629	1	1	3.93128e-06	104.59	AVAHFPTAVK(1)EFK	3	-0.73332	1	0.459	0.419	0.486	0.882	0.926	0.952	2.278	2.227	2.199	0.622	0.643	0.631	0.927	0.898	0.918	1.584	1.502	1.55	0.737942	0.651633	0.770206	0.951456	1.03118
CSA018930.1	96	K	nudix hydrolase 3-like	3	3	1	0.00166322	113.69	LLPEATK(1)PVK	2	1.4375	1	1	1.17453e-05	137.89	LLPEATK(1)PVK	2	-0.17098	1	1	0.000737953	126.19	LLPEATK(1)PVK	2	1.2602	2	0.825	0.748	0.779	0.998	1.306	1.269	1.431	1.188	1.189
CSA018939.1	21	K	importin subunit beta-1	3	3	1	0.00291462	83.948	K(1)HAEESLK	3	1.8987	1	1	0.000350118	108.43	K(1)HAEESLK	3	1.5803	1	1	0.0015014	91.867	K(1)HAEESLK	2	0.8379	2	0.947	1.01	0.926	0.965	0.976	0.969	1.233	1.097	1.269	1.037	0.991	0.962	0.929	1.051	0.974	1.025	0.957	1.082	0.913211	1.01917	0.962578	1.03875	0.928639
CSA018950.1	111	K	glyceraldehyde-3-phosphate dehydrogenase B, chloroplastic	3	3	1	2.0817e-06	84.375	K(1)NSPVDVIVVNDSGGVK	4	0.60602	1	1	8.33765e-43	191.07	K(1)NSPVDVIVVNDSGGVK	2	-0.45869	2	1	1.40348e-10	100.58	K(1)NSPVDVIVVNDSGGVK	3	0.065408	1	0.503	0.394	0.521	1.196	1.104	0.938	1.813	2.065	2.143	0.448	0.37	0.427	0.808	0.806	0.868	1.956	2.066	1.906	1.12277	1.06486	1.22014	1.4802	1.36973
CSA018950.1	159	K	glyceraldehyde-3-phosphate dehydrogenase B, chloroplastic	3	3	1	1.12778e-40	201.04	IVDNETISVDGK(1)PIK	2	-2.1535	2	1	1.17118e-46	201.57	IVDNETISVDGK(1)PIK	3	-1.5183	3	1	8.5548e-09	95.755	IVDNETISVDGK(1)PIK	3	-3.1436	1	0.643	0.542	0.921	0.862	0.88	0.794	1.95	2.057	1.501	0.448	0.37	0.427	0.808	0.806	0.868	1.956	2.066	1.906	1.43527	1.46486	2.15691	1.06683	1.09181
CSA018950.1	314	K	glyceraldehyde-3-phosphate dehydrogenase B, chloroplastic	3	0	1	2.75209e-25	145.31	AVSLVLPQLK(1)GK	2	0.083855	2	1	4.28902e-28	142.83	AVSLVLPQLK(1)GK	2	0.24106	2	1	7.57002e-22	150.49	AVSLVLPQLK(1)GK	2	-0.47233	2										0.448	0.37	0.427	0.808	0.806	0.868	1.956	2.066	1.906
CSA018973.1	247	K	ADP,ATP carrier protein, mitochondrial-like	3	3	1	4.24057e-46	201.65	K(1)TLQSDGIAGLYR	2	2.1804	2	1	5.668e-54	218.6	K(1)TLQSDGIAGLYR	2	0.0502	2	1	2.06834e-23	199.38	K(1)TLQSDGIAGLYR	2	1.3147	2	1.404	1.377	1.231	0.79	0.903	0.993	0.563	0.515	0.609	1.376	1.256	1.277	0.886	0.886	0.919	0.651	0.71	0.688	1.02035	1.09634	0.963978	0.891648	1.01919
CSA018973.1	383	K	ADP,ATP carrier protein, mitochondrial-like	3	3	1	2.54306e-06	134.25	LQMIVLGK(1)K	2	1.0739	1	1	3.4763e-05	134.25	LQMIVLGK(1)K	2	0.13329	2	1	0.000140064	134.25	LQMIVLGK(1)K	2	-0.42339	4	1.491	1.475	1.366	0.777	0.766	0.794	0.41	0.496	0.586	1.376	1.256	1.277	0.886	0.886	0.919	0.651	0.71	0.688	1.08358	1.17436	1.06969	0.876975	0.86456
CSA018977.1	34	K	uncharacterized protein LOC103503388	3	3	1	0.000495362	113.26	NAYHTK(1)YR	2	1.4767	2	1	3.24406e-06	153.05	NAYHTK(1)YR	2	0.96435	2	1	0.000256327	131.5	NAYHTK(1)YR	2	0.24306	2	1.409	1.394	1.393	0.824	0.791	0.807	0.512	0.614	0.514
CSA019040.1	114	K	chorismate mutase 1, chloroplastic-like	3	3	1	0.00729423	98.582	FVAEAK(1)FR	2	-0.87799	1	1	0.00502153	96.668	FVAEAK(1)FR	2	0.11067	1	1	0.00564301	95.358	FVAEAK(1)FR	2	0.19295	1	0.74	0.82	0.733	1.143	1.152	1.115	1.417	1.236	1.479
CSA019131.1	324	K	RAB GTPase-like protein G3A, partial	3	3	1	0.0188132	83.364	FLSTIK(1)R	2	1.2691	1	1	0.0325326	77.282	FLSTIK(1)R	2	-0.6356	1	1	0.0141043	87.323	FLSTIK(1)R	2	0.50897	2	1.349	1.223	1.529	0.785	0.781	0.611	0.676	0.936	0.481
CSA019160.1	278	K	staphylococcal nuclease domain-containing protein 1	3	3	1	0.011626	60.167	EAK(1)HFTEIR	3	0.88931	1	1	0.0114753	60.167	EAK(1)HFTEIR	3	1.0031	1	1	0.0118956	58.474	EAK(1)HFTEIR	3	0.78712	1	0.901	0.986	0.918	1.023	1.012	0.979	1.252	1.097	1.27	1.153	1.222	1.228	1.075	1.05	1.066	0.712	0.598	0.641	0.78144	0.806874	0.747557	0.951628	0.96381
CSA019160.1	634	K	staphylococcal nuclease domain-containing protein 1	3	2	1	7.35369e-29	169.64	DSAPTHIADLTTGSAK(1)K	3	2.3192	1	1	0.000251584	73.296	DSAPTHIADLTTGSAK(1)K	4	1.0724	1	1	2.57635e-17	116.96	DSAPTHIADLTTGSAK(1)K	3	1.4698	1		1.142	1.146		0.995	1.029		0.835	0.739	1.153	1.222	1.228	1.075	1.05	1.066	0.712	0.598	0.641		0.934534	0.933225		0.947619
CSA019160.1	789	K	staphylococcal nuclease domain-containing protein 1	3	3	0.998628	0.00155653	103.83	K(0.999)HK(0.001)EELK	4	-0.32327	1	0.999969	0.00120554	130.27	K(1)HKEELK	4	0.2704	1	0.999998	5.38007e-05	143.12	K(1)HKEELK	4	-0.13305	1	1.322	1.34	1.222	1.051	1.031	1.171	0.404	0.434	0.399	1.153	1.222	1.228	1.075	1.05	1.066	0.712	0.598	0.641	1.14657	1.09656	0.995114	0.977674	0.981905
CSA019161.1	59	K	calnexin homolog 1-like	3	3	1	0.00678431	83.614	GVWK(1)HAK	3	0.58378	2	1	0.038604	51.787	GVWK(1)HAK	3	-3.6177	1	1	0.0231996	62.714	GVWK(1)HAK	3	-2.4929	1	1.558	1.607	1.524	0.731	0.65	0.736	0.338	0.392	0.334	1.652	1.632	1.485	0.769	0.803	0.816	0.314	0.329	0.448	0.943099	0.984681	1.02626	0.950585	0.809465
CSA019161.1	62	K	calnexin homolog 1-like	3	3	1	0.00682026	42.58	HAK(1)SEGHDDHGLLVSEK	5	-0.17238	1	1	1.61524e-05	78.078	HAK(1)SEGHDDHGLLVSEK	5	0.96355	1	1	0.00232093	48.907	HAK(1)SEGHDDHGLLVSEK	5	0.021716	1	1.247	1.238	1.155	1.066	1.127	1.028	0.53	0.507	0.721	1.652	1.632	1.485	0.769	0.803	0.816	0.314	0.329	0.448	0.754843	0.758578	0.777778	1.38622	1.40349
CSA019161.1	91	K	calnexin homolog 1-like	3	3	1	0.0034914	102.52	VLDEPVK(1)LK	3	2.6385	2	1	0.0028381	110.38	VLDEPVK(1)LK	3	-0.47999	2	1	0.00107295	113.93	VLDEPVK(1)LK	3	2.2418	2	1.353	1.492	1.508	0.858	0.843	0.795	0.578	0.375	0.29	1.652	1.632	1.485	0.769	0.803	0.816	0.314	0.329	0.448	0.819007	0.914216	1.01549	1.11573	1.04981
CSA019161.1	151	K	calnexin homolog 1-like	3	3	1	0.00628347	58.32	CGATNK(1)VHFILK	3	-0.95357	1	1	0.00874438	56.139	CGATNK(1)VHFILK	3	-0.42722	1	1	0.0163066	49.483	CGATNK(1)VHFILK	3	-0.78878	1	1.103	1.09	1.069	0.98	0.962	0.915	0.914	0.969	1.044	1.652	1.632	1.485	0.769	0.803	0.816	0.314	0.329	0.448	0.667676	0.667892	0.719865	1.27438	1.19801
CSA019161.1	157	K	calnexin homolog 1-like	3	3	1	1.02462e-05	136.11	VHFILK(1)HK	2	-0.32717	5	1	0.000739489	107.9	VHFILK(1)HK	2	0.097055	5	1	0.000662832	122.13	VHFILK(1)HK	2	-0.10451	6	1.46	1.322	1.278	0.883	0.904	0.834	0.342	0.612	0.715	1.652	1.632	1.485	0.769	0.803	0.816	0.314	0.329	0.448	0.883777	0.810049	0.860606	1.14824	1.12578
CSA019161.1	205	K	calnexin homolog 1-like	3	3	1	0.00132006	94.692	ILIDGEEK(1)K	2	-0.46013	1	1	0.00317736	86.344	ILIDGEEK(1)K	2	1.3581	1	1	0.000854387	100.88	ILIDGEEK(1)K	3	2.9501	3	1.355	1.379	1.306	0.877	0.892	0.876	0.553	0.523	0.605	1.652	1.632	1.485	0.769	0.803	0.816	0.314	0.329	0.448	0.820218	0.844975	0.879461	1.14044	1.11083
CSA019168.1	234	K	tetraspanin-8	3	3	1	0.000702008	121.02	IK(1)SCLQDSK	2	0.22731	1	1	0.00113349	121.02	IK(1)SCLQDSK	2	0.022636	1	1	0.00108867	110.08	IK(1)SCLQDSK	2	0.56592	1	1.086	1.086	1.023	1.012	1.007	1.032	0.909	0.921	0.988
CSA019196.1	111	K	DNA-directed RNA polymerases II, IV and V subunit 11 isoform X1	3	3	1	0.00353832	63.727	NAFEAEVAK(1)HSR	3	1.0039	2	1	0.000436648	81.908	NAFEAEVAK(1)HSR	3	0.46331	2	1	0.00236049	67.079	NAFEAEVAK(1)HSR	3	1.7194	3	1.083	1.017	1.046	0.984	1.005	0.999	0.949	1.047	0.983	1.269	1.277	1.265	0.899	0.915	0.916	0.742	0.708	0.724	0.853428	0.796398	0.826877	1.09455	1.09836
CSA019238.1	133	K	aminopeptidase M1	3	3	1	0.00348769	70.942	STYAHCGEK(1)K	3	-0.0033186	1	1	0.00060214	99.283	STYAHCGEK(1)K	3	0.23065	1	1	0.000133416	104.43	STYAHCGEK(1)K	3	0.15562	1	1.181	1.242	1.25	0.916	1.019	0.964	0.84	0.626	0.606	1.009	0.969	1.01	0.966	0.958	0.934	1.038	1.058	1.089	1.17047	1.28173	1.23762	0.94824	1.06367
CSA019238.1	295	K	aminopeptidase M1	3	3	1	2.50426e-56	212.32	ETALLYDDK(1)HSAAANK	3	2.5359	1	1	6.92892e-43	187.04	ETALLYDDK(1)HSAAANK	4	0.89483	2	1	2.13649e-29	197.88	ETALLYDDK(1)HSAAANK	4	1.7447	2	0.958	0.996	0.897	0.966	0.935	0.927	1.211	1.168	1.381	1.009	0.969	1.01	0.966	0.958	0.934	1.038	1.058	1.089	0.949455	1.02786	0.888119	1	0.975992
CSA019238.1	302	K	aminopeptidase M1	3	2	1	3.05942e-07	143.03	HSAAANK(1)QR	3	-0.11634	1	1	0.000733049	106.6	HSAAANK(1)QR	3	0.82199	1	1	7.40154e-07	122.44	HSAAANK(1)QR	3	-0.98621	1	0.822	0.981		0.892	0.45		1.564	1.761		1.009	0.969	1.01	0.966	0.958	0.934	1.038	1.058	1.089	0.814668	1.01238		0.923395	0.469729
CSA019238.1	434	K	aminopeptidase M1	3	3	1	1.25082e-06	144.09	ALASYIK(1)K	2	0.12565	1	1	0.000675104	120.15	ALASYIK(1)K	3	-1.9245	2	1	0.000190302	130.75	ALASYIK(1)K	2	0.058262	2	1.226	1.183	1.187	0.935	1.021	0.914	0.733	0.729	0.802	1.009	0.969	1.01	0.966	0.958	0.934	1.038	1.058	1.089	1.21506	1.22085	1.17525	0.967909	1.06576
CSA019241.1	79	K	ran-binding protein 1 homolog c-like	3	3	1	0.000443785	125.75	GVGTVK(1)LLK	2	-0.31613	1	1	0.00490234	83.862	GVGTVK(1)LLK	2	-0.17714	1	1	0.00111953	102.52	GVGTVK(1)LLK	2	-0.048871	1	1.111	1.076	1.046	1.024	1.041	0.985	0.844	0.901	1.001	1.315	1.364	1.36	0.899	0.876	0.867	0.633	0.621	0.608	0.844867	0.788856	0.769118	1.13904	1.18836
CSA019241.1	88	K	ran-binding protein 1 homolog c-like	3	3	1	0.00100801	101.72	HTQTTK(1)VR	3	-1.6079	1	1	0.000545421	129.85	HTQTTK(1)VR	2	-0.72381	3	1	0.000437708	111.82	HTQTTK(1)VR	3	-0.52548	2	1.398	1.418	1.419	0.814	0.861	0.745	0.544	0.489	0.54	1.315	1.364	1.36	0.899	0.876	0.867	0.633	0.621	0.608	1.06312	1.03959	1.04338	0.905451	0.982877
CSA019255.1	1660	K	acetyl-CoA carboxylase 1	3	3	1	0.0029339	72.705	IK(1)SSVIAHELK	3	-0.18856	1	1	0.00333596	66.989	IK(1)SSVIAHELK	3	1.122	1	1	0.00228586	71.888	IK(1)SSVIAHELK	3	0.44889	1	0.956	0.961	1.086	0.904	0.893	0.903	1.291	1.28	1.023	1.229	1.232	1.259	0.792	0.727	0.781	0.93	0.988	0.877	0.777868	0.780032	0.862589	1.14141	1.22834
CSA019255.1	2042	K	acetyl-CoA carboxylase 1	3	2	1	0.00084336	111.63	LDQQLINLK(1)K	2	2.0352	1	1	3.95223e-06	142.08	LDQQLINLK(1)K	3	0.26086	2	1	0.000562262	124.12	LDQQLINLK(1)K	2	1.2389	2		1.367	1.356		0.786	0.755		0.668	0.657	1.229	1.232	1.259	0.792	0.727	0.781	0.93	0.988	0.877		1.10958	1.07705		1.08116
CSA019351.1	155	K	uncharacterized protein LOC100243326 isoform X2	3	3	1	0.00804374	85.676	TTGLGLK(1)K	2	0.83193	1	1	0.00373365	95.502	TTGLGLK(1)K	2	0.97632	2	1	0.00665737	86.67	TTGLGLK(1)K	2	0.10992	2	1.628	1.355	1.533	0.592	0.74	0.626	0.372	0.744	0.456
CSA019410.1	65	K	nodal modulator 1	3	2	1	0.00260516	87.251	GK(1)HLLQLR	3	0.50165	1	1	0.021738	57.047	GK(1)HLLQLR	3	1.2707	1	1	0.0331873	49.833	GK(1)HLLQLR	3	0.23731	1	0.948		0.982	1.085		1.054	1.086		1.044	1.093	1.112	1.062	1.036	0.981	1.038	0.765	0.865	0.834	0.867338		0.92467	1.0473
CSA019423.1	33	K	proteasome subunit alpha type-6	3	2	1	0.000201097	92.528	AVK(1)SSGITSIGVR	2	1.8521	1	1	0.000123884	93.716	AVK(1)SSGITSIGVR	2	-2.6484	1	1	4.49593e-06	134.37	AVK(1)SSGITSIGVR	2	0.46396	2	0.996		1.112	0.945		1.043	1.163		0.79	1.087	1.141	1.136	1.037	1.053	1.054	0.783	0.742	0.752	0.916283		0.978873	0.911283
CSA019423.1	54	K	proteasome subunit alpha type-6	3	3	1	4.65786e-05	102.5	GKDSVCVVTQK(1)K	3	-0.11973	1	1	4.46606e-05	109.83	GKDSVCVVTQK(1)K	3	-0.46434	1	1	0.000691515	87.083	GKDSVCVVTQK(1)K	3	-0.98773	3	1.459	1.445	1.279	0.933	0.983	0.992	0.284	0.298	0.511	1.087	1.141	1.136	1.037	1.053	1.054	0.783	0.742	0.752	1.34223	1.26643	1.12588	0.899711	0.933523
CSA019423.1	181	K	proteasome subunit alpha type-6	3	3	1	1.83175e-07	135.91	EQEAINFLEK(1)K	3	-0.076453	2	1	0.000141226	118.52	EQEAINFLEK(1)K	2	-1.7318	2	1	0.000780959	94.09	EQEAINFLEK(1)K	2	-0.89796	2	0.956	0.906	0.882	1.116	0.991	1.112	1.031	1.267	1.176	1.087	1.141	1.136	1.037	1.053	1.054	0.783	0.742	0.752	0.879485	0.79404	0.776408	1.07618	0.941121
CSA019424.1	141	K	2-methyl-6-phytyl-1,4-hydroquinone methyltransferase, chloroplastic-like	3	3	1	1.57233e-42	179.87	HVDAK(1)NVTILDQSPHQLAK	3	1.2393	2	1	1.33446e-16	116.6	HVDAK(1)NVTILDQSPHQLAK	4	1.0085	1	1	1.77198e-22	116.6	HVDAK(1)NVTILDQSPHQLAK	4	0.19426	1	0.697	0.726	0.707	0.914	0.965	1.056	1.779	1.626	1.607	0.89	0.761	0.785	0.884	0.827	0.881	1.27	1.47	1.426	0.783146	0.954008	0.900637	1.03394	1.16687
CSA019424.1	155	K	2-methyl-6-phytyl-1,4-hydroquinone methyltransferase, chloroplastic-like	3	3	1	1.44414e-35	176.49	NVTILDQSPHQLAK(1)AK	3	0.54757	1	1	1.52327e-34	177.04	NVTILDQSPHQLAK(1)AK	3	-1.8233	1	1	1.11048e-15	153.72	NVTILDQSPHQLAK(1)AK	3	-1.1219	1	0.607	0.565	0.588	0.891	0.826	0.876	1.981	2.08	2.086	0.89	0.761	0.785	0.884	0.827	0.881	1.27	1.47	1.426	0.682022	0.742444	0.749045	1.00792	0.998791
CSA019476.1	56	K	protein SGT1 homolog	3	3	0.752828	0.0123545	47.621	AAQPVVSSTK(0.247)PK(0.753)YR	3	-2.3941	1	0.976391	6.73936e-07	97.797	AAQPVVSSTK(0.024)PK(0.976)YR	3	-1.5222	1	0.962366	4.01838e-06	95.981	AAQPVVSSTK(0.038)PK(0.962)YR	3	-1.8351	1	1.048	1.073	0.99	1.064	1.097	1.082	0.918	0.84	0.992	1.024	1.205	1.016	0.932	0.961	0.91	1.04	0.759	1.074	1.02344	0.890456	0.974409	1.14163	1.14152
CSA019497.1	72	K	uncharacterized protein LOC109001808	3	3	1	0.00179948	112.84	LGNEASIK(1)QR	2	0.25382	1	1	0.00408185	88.803	LGNEASIK(1)QR	2	-0.021337	2	1	0.00108748	116.74	LGNEASIK(1)QR	2	-0.56725	2	1.257	1.175	1.192	1.055	1.103	1.158	0.526	0.649	0.478	0.986	0.991	1.007	1.412	1.496	1.493	0.561	0.481	0.365	1.27485	1.18567	1.18371	0.747167	0.737299
CSA019497.1	169	K	uncharacterized protein LOC109001808	3	0	1	0.00989006	86.898	LTK(1)LNILK	2	0.19717	1	1	0.000418593	98.048	LTK(1)LNILK	2	-1.3316	1	1	0.0104908	98.048	LTK(1)LNILK	2	0.03737	1										0.986	0.991	1.007	1.412	1.496	1.493	0.561	0.481	0.365
CSA019497.1	227	K	uncharacterized protein LOC109001808	3	2	1	0.000740874	71.933	YLDSDHFSVPQGK(1)R	3	1.0113	1	1	0.0101523	57.034	YLDSDHFSVPQGK(1)R	3	0.94607	1	1	1.79514e-06	94.747	YLDSDHFSVPQGK(1)R	3	0.55322	1	0.901		0.945	1.103		1.166	1.154		0.977	0.986	0.991	1.007	1.412	1.496	1.493	0.561	0.481	0.365	0.913793		0.938431	0.781161
CSA019497.1	287	K	uncharacterized protein LOC109001808	3	3	1	0.0379059	76.572	VPYESK(1)GK	2	2.1083	1	1	0.00845835	90.15	VPYESK(1)GK	2	0.57793	1	1	0.00251248	105.52	VPYESK(1)GK	2	0.12738	1	1.203	1.205	1.137	1.079	1.183	1.232	0.6	0.5	0.496	0.986	0.991	1.007	1.412	1.496	1.493	0.561	0.481	0.365	1.22008	1.21594	1.1291	0.764164	0.790775
CSA019545.1	537	K	uncharacterized protein LOC104610239	3	3	1	0.00134821	96.113	QYSAGPSK(1)R	2	0.99431	1	1	0.0165943	68.786	QYSAGPSK(1)R	2	-0.48477	1	1	0.0145942	68.355	QYSAGPSK(1)R	2	0.426	1	1.189	1.238	1.062	0.868	0.901	0.968	0.885	0.768	0.991
CSA019612.1	168	K	delta-aminolevulinic acid dehydratase, chloroplastic	3	3	1	0.000891968	100.93	HGLVEEVSK(1)AR	2	-0.33574	2	1	2.74498e-10	158.3	HGLVEEVSK(1)AR	2	1.1234	2	1	0.000129901	127.78	HGLVEEVSK(1)AR	2	0.82766	2	1.083	0.893	0.865	1.23	1.368	1.349	0.648	0.854	0.91	0.758	0.79	0.776	1.425	1.39	1.328	0.893	0.845	0.926	1.42876	1.13038	1.11469	0.863158	0.984173
CSA019612.1	322	K	delta-aminolevulinic acid dehydratase, chloroplastic	3	3	1	2.01748e-17	171.32	K(1)TYQMNPANYR	2	-1.1374	3	1	1.08338e-06	140.91	K(1)TYQMNPANYR	2	-0.47612	4	1	1.66867e-09	160.22	K(1)TYQMNPANYR	2	-0.64444	3	0.785	0.757	0.685	1.379	1.445	1.597	1.042	1.009	0.961	0.758	0.79	0.776	1.425	1.39	1.328	0.893	0.845	0.926	1.03562	0.958228	0.882732	0.967719	1.03957
CSA019638.1	601	K	protein TONSOKU	3	3	1	1.2355e-14	155.88	STDSQQTFVGHK(1)R	3	0.96733	1	1	6.78237e-13	148.62	STDSQQTFVGHK(1)R	3	0.72899	1	1	1.97801e-08	149.41	STDSQQTFVGHK(1)R	3	1.3973	2	1.232	1.406	1.399	0.811	0.767	0.728	0.868	0.621	0.601
CSA019642.1	558	K	pyruvate kinase 1, cytosolic isoform X2	3	3	1	0.000277021	93.843	ASGVIK(1)SHDR	2	-0.093599	2	1	0.000237345	126.71	ASGVIK(1)SHDR	3	0.47455	2	1	0.0040223	74.537	ASGVIK(1)SHDR	2	0.29381	2	1.143	1.173	1.149	0.94	1.005	0.942	0.885	0.766	0.843	1.332	1.292	1.213	0.892	0.838	0.879	0.658	0.744	0.802	0.858108	0.907895	0.947238	1.05381	1.19928
CSA019726.1	428	K	valine--tRNA ligase, mitochondrial 1 isoform X2	3	3	1	9.75248e-06	86.214	ITPAHDPNDFEVGK(1)R	3	0.38511	1	1	2.10265e-10	120.8	ITPAHDPNDFEVGK(1)R	3	-0.84722	1	1	1.32833e-05	79.652	ITPAHDPNDFEVGK(1)R	3	-1.6941	1	0.843	1.111	0.977	1.516	1.02	1.194	0.764	0.862	0.874	1.288	1.243	1.274	1.005	1.004	0.996	0.614	0.602	0.599	0.654503	0.893805	0.766876	1.50846	1.01594
CSA019726.1	478	K	valine--tRNA ligase, mitochondrial 1 isoform X2	3	2	1	0.00526401	106.68	GAK(1)NNEMR	2	1.0633	1	1	0.00522977	96.034	GAK(1)NNEMR	2	0.13808	1	1	0.00915188	91.265	GAK(1)NNEMR	2	0.43836	1	1.412	1.414		0.955	0.989		0.346	0.348		1.288	1.243	1.274	1.005	1.004	0.996	0.614	0.602	0.599	1.09627	1.13757		0.950249	0.98506
CSA019750.1	4	K	triosephosphate isomerase, cytosolic	3	3	1	0.000280172	121.73	K(1)FFVGGNWK	3	-0.60367	3	1	0.000599665	123.86	K(1)FFVGGNWK	3	1.4209	3	1	0.000559471	120.99	K(1)FFVGGNWK	3	0.55186	3	1.145	1.119	1.198	1.016	0.971	1.023	0.788	0.902	0.639	1.02	1.018	0.989	1.035	1.01	1.037	0.949	0.968	0.972	1.12255	1.09921	1.21132	0.981643	0.961386
CSA019797.1	321	K	serine/threonine-protein phosphatase 2A 65 kDa regulatory subunit A beta isoform	3	3	1	0.00428955	91.549	IAAAGK(1)VTK	2	-0.56374	1	1	0.00221482	113.93	IAAAGK(1)VTK	2	0.3532	1	1	0.00107295	113.93	IAAAGK(1)VTK	2	0.31521	1	1.102	1.182	1.169	0.994	0.953	0.944	0.898	0.813	0.801	0.999	0.942	0.99	1.021	1.013	1.026	0.981	1.007	0.966	1.1031	1.25478	1.18081	0.973555	0.94077
CSA019797.1	479	K	serine/threonine-protein phosphatase 2A 65 kDa regulatory subunit A beta isoform	3	3	1	0.00312881	87.806	DAAANNVK(1)R	2	2.0358	1	1	0.00548714	77.192	DAAANNVK(1)R	2	1.4035	1	1	0.00164884	93.667	DAAANNVK(1)R	2	1.8278	1	0.951	1.009	0.978	1.042	1.032	1.06	1.133	1.031	1.045	0.999	0.942	0.99	1.021	1.013	1.026	0.981	1.007	0.966	0.951952	1.07113	0.987879	1.02057	1.01876
CSA019899.1	62	K	14-3-3 protein 7	3	3	1	6.50283e-10	147.36	GHEQNVK(1)R	3	1.4883	5	1	1.23214e-05	144.12	GHEQNVK(1)R	2	0.068465	3	1	1.33992e-05	124.51	GHEQNVK(1)R	2	-0.12886	4	0.827	0.811	0.792	1.155	1.097	1.192	1.235	1.316	1.259	0.875	0.886	0.835	1.07	1.066	1.05	1.059	1.101	1.113	0.945143	0.91535	0.948503	1.07944	1.02908
CSA019956.1	16	K	60S ribosomal protein L34-like	3	3	1	0.000197365	94.363	HSYATK(1)SNQHR	4	1.7281	1	1	0.00030918	106.16	HSYATK(1)SNQHR	3	0.93157	3	1	5.70026e-05	123.96	HSYATK(1)SNQHR	4	2.9123	2	1.82	1.738	1.913	0.103	0.48	0.177	0.595	0.352	0.247	2.053	2.004	1.89	0.31	0.328	0.425	0.286	0.337	0.39	0.886508	0.867265	1.01217	0.332258	1.46341
CSA019956.1	36	K	60S ribosomal protein L34-like	3	3	1	0.00102511	115.71	LVYQSTK(1)K	2	0.3402	2	1	0.000493209	126.07	LVYQSTK(1)K	2	0.15035	2	1	0.00106283	113.18	LVYQSTK(1)K	2	-0.017313	2	1.716	1.764	1.757	0.411	0.365	0.32	0.423	0.439	0.389	2.053	2.004	1.89	0.31	0.328	0.425	0.286	0.337	0.39	0.83585	0.88024	0.92963	1.32581	1.1128
CSA019956.1	49	K	60S ribosomal protein L34-like	3	3	1	0.000732321	124.59	CPVTGK(1)R	2	1.5876	1	1	0.00331975	116.9	CPVTGK(1)R	2	0.72883	2	1	0.00233719	116.9	CPVTGK(1)R	2	0.82699	2	1.65	1.773	1.773	0.39	0.346	0.283	0.576	0.444	0.4	2.053	2.004	1.89	0.31	0.328	0.425	0.286	0.337	0.39	0.803702	0.884731	0.938095	1.25806	1.05488
CSA019956.1	63	K	60S ribosomal protein L34-like	3	3	1	0.00131679	67.234	IQGIPHLRPAEYK(1)R	3	-0.97123	2	1	0.00341435	60.55	IQGIPHLRPAEYK(1)R	4	-0.67028	1	1	0.0032545	57.212	IQGIPHLRPAEYK(1)R	4	-0.91821	1	1.333	1.197	1.108	0.698	0.904	0.833	0.813	0.841	1.067	2.053	2.004	1.89	0.31	0.328	0.425	0.286	0.337	0.39	0.649294	0.597305	0.586243	2.25161	2.7561
CSA019996.1	252	K	aminomethyltransferase, mitochondrial	3	3	1	1.27677e-09	147.74	AIIEK(1)SEGK	2	0.7571	2	1	1.78271e-05	141.88	AIIEK(1)SEGK	3	1.4637	2	1	0.000234174	132.25	AIIEK(1)SEGK	2	1.192	1	0.632	0.611	0.499	0.981	0.967	1.005	1.824	1.832	2.103	0.52	0.526	0.515	0.889	0.856	0.866	1.773	1.783	1.803	1.21538	1.1616	0.968932	1.10349	1.12967
CSA019996.1	362	K	aminomethyltransferase, mitochondrial	3	3	1	2.54306e-06	134.25	K(1)NIAMGYVK	2	-0.46277	3	1	3.4763e-05	134.25	K(1)NIAMGYVK	3	-0.44804	4	1	0.000140064	134.25	K(1)NIAMGYVK	2	-0.0034132	4	0.662	0.665	0.592	1.168	1.169	1.228	1.537	1.497	1.625	0.52	0.526	0.515	0.889	0.856	0.866	1.773	1.783	1.803	1.27308	1.26426	1.14951	1.31384	1.36565
CSA019996.1	370	K	aminomethyltransferase, mitochondrial	3	3	1	3.54632e-11	146.59	NIAMGYVK(1)TGSHK	3	0.4419	2	1	1.00268e-05	107.65	NIAMGYVK(1)TGSHK	3	1.1109	2	1	1.02656e-06	117.93	NIAMGYVK(1)TGSHK	3	0.49608	3	0.731	0.769	0.784	1.059	1.007	1.074	1.537	1.497	1.428	0.52	0.526	0.515	0.889	0.856	0.866	1.773	1.783	1.803	1.40577	1.46198	1.52233	1.19123	1.1764
CSA019997.1	369	K	dihydrolipoyllysine-residue succinyltransferase component of 2-oxoglutarate dehydrogenase complex 2, mitochondrial-like	3	3	1	0.00130288	113.62	AINTLAK(1)K	2	-0.31888	3	1	0.00584353	90.15	AINTLAK(1)K	2	-2.0272	1	1	0.00102161	113.62	AINTLAK(1)K	2	-0.38708	2	0.784	0.837	0.755	0.99	1.067	1.023	1.519	1.303	1.553	0.742	0.78	0.752	1.005	0.977	1.003	1.319	1.325	1.362	1.0566	1.07308	1.00399	0.985075	1.09212
CSA020068.1	137	K	ACT domain-containing protein ACR11-like	3	2	1	1.93e-27	176.4	ANVYLDSSGK(1)HTK	3	0.21908	2	1	0.000954163	71.08	ANVYLDSSGK(1)HTK	3	0.98965	1	1	6.73235e-12	168.5	ANVYLDSSGK(1)HTK	3	0.57884	1	0.624		0.404	1.094		1.214	1.703		2.028	0.457	0.487	0.559	1.027	0.962	0.954	1.774	1.764	1.64	1.36543		0.722719	1.06524
CSA020068.1	255	K	ACT domain-containing protein ACR11-like	3	3	1	0.00127578	94.806	AK(1)FHVNYR	3	0.99138	1	1	0.00110936	95.815	AK(1)FHVNYR	3	0.78173	2	1	0.000622742	106.38	AK(1)FHVNYR	2	2.853	3	0.792	0.885	0.809	1.015	0.921	1.011	1.474	1.386	1.456	0.457	0.487	0.559	1.027	0.962	0.954	1.774	1.764	1.64	1.73304	1.81725	1.44723	0.988315	0.95738
CSA020092.1	204	K	ruvB-like 2	3	3	1	0.000139046	105.99	FVQCPDGELQK(1)R	2	-0.29983	1	1	0.0017202	66.023	FVQCPDGELQK(1)R	3	-1.3755	1	1	1.63124e-05	101.71	FVQCPDGELQK(1)R	3	-0.4351	1	1.02	0.908	1.06	0.85	0.932	0.968	1.23	1.333	0.995
CSA020117.1	155	K	glycine dehydrogenase (decarboxylating), mitochondrial	3	3	1	0.0141528	97.431	NLASK(1)NK	2	0.13712	1	1	0.00984123	97.431	NLASK(1)NK	2	0.37811	1	1	0.00523995	109.71	NLASK(1)NK	3	1.4769	4	0.518	0.471	0.519	1.009	0.996	0.937	2.01	2.051	2.148	0.573	0.57	0.566	0.866	0.859	0.846	1.77	1.754	1.783	0.904014	0.826316	0.916961	1.16513	1.15949
CSA020117.1	804	K	glycine dehydrogenase (decarboxylating), mitochondrial	3	3	1	3.86066e-30	150.7	TFCIPHGGGGPGMGPIGVK(1)K	3	0.33305	3	1	3.8074e-26	145.48	TFCIPHGGGGPGMGPIGVK(1)K	4	0.10358	2	1	6.91478e-32	162.77	TFCIPHGGGGPGMGPIGVK(1)K	3	0.92939	2	0.747	0.714	0.682	1.206	1.196	1.182	1.327	1.377	1.5	0.573	0.57	0.566	0.866	0.859	0.846	1.77	1.754	1.783	1.30366	1.25263	1.20495	1.39261	1.39232
CSA020117.1	876	K	glycine dehydrogenase (decarboxylating), mitochondrial	3	3	1	5.11727e-70	233.84	IAILNANYMAK(1)R	3	0.36685	5	1	1.45815e-23	175.49	IAILNANYMAK(1)R	3	0.25765	3	1	1.98729e-05	130.01	IAILNANYMAK(1)R	3	-0.43453	4	0.547	0.625	0.567	1.084	1.01	1.03	1.864	1.755	1.93	0.573	0.57	0.566	0.866	0.859	0.846	1.77	1.754	1.783	0.954625	1.09649	1.00177	1.25173	1.17579
CSA020117.1	905	K	glycine dehydrogenase (decarboxylating), mitochondrial	3	3	1	8.937e-40	197.14	GFK(1)NTAGIEAEDVAKR	3	-0.41688	5	1	1.40986e-94	250.27	GFK(1)NTAGIEAEDVAKR	3	-0.54486	3	1	4.82142e-37	208.49	GFK(1)NTAGIEAEDVAKR	3	-0.59193	3	0.561	0.477	0.516	1.151	1.162	1.144	1.754	1.847	1.892	0.573	0.57	0.566	0.866	0.859	0.846	1.77	1.754	1.783	0.979058	0.836842	0.911661	1.3291	1.35274
CSA020117.1	917	K	glycine dehydrogenase (decarboxylating), mitochondrial	3	3	1	2.46545e-14	157.68	NTAGIEAEDVAK(1)R	3	0.11446	5	1	6.49673e-24	174.24	NTAGIEAEDVAK(1)R	2	-1.1654	3	1	3.34901e-06	132.81	NTAGIEAEDVAK(1)R	2	-1.4755	4	0.476	0.561	0.507	0.999	1.039	0.967	2.104	1.839	2.133	0.573	0.57	0.566	0.866	0.859	0.846	1.77	1.754	1.783	0.830716	0.984211	0.89576	1.15358	1.20955
CSA020117.1	971	K	glycine dehydrogenase (decarboxylating), mitochondrial	3	3	1	2.21265e-43	212.9	GK(1)ADINNNVLK	2	0.54152	2	1	2.1952e-09	149.41	GK(1)ADINNNVLK	2	0.453	2	1	3.50404e-30	205.49	GK(1)ADINNNVLK	3	-0.42888	2	0.516	0.532	0.53	1.101	1.126	1.107	1.902	1.788	1.908	0.573	0.57	0.566	0.866	0.859	0.846	1.77	1.754	1.783	0.900524	0.933333	0.936396	1.27136	1.31083
CSA020192.1	148	K	cellular nucleic acid-binding protein	3	3	1	0.00220367	93.992	K(1)TGHLAR	3	-0.14523	1	1	0.00225552	93.992	K(1)TGHLAR	3	-0.10871	3	1	0.00422899	87.251	K(1)TGHLAR	3	-0.50474	1	1.607	1.668	1.513	0.636	0.66	0.697	0.359	0.267	0.408	1.065	0.828	1.435	0.904	1.039	0.511	1.014	1.195	0.926	1.50892	2.01449	1.05436	0.70354	0.635226
CSA020255.1	106	K	uncharacterized protein LOC100245365 isoform X3	3	3	1	3.17334e-49	214.58	SDDITVDSTVSGK(1)R	2	-0.25452	2	1	3.27796e-72	227.47	SDDITVDSTVSGK(1)R	2	-0.40541	1	1	4.09904e-18	178.23	SDDITVDSTVSGK(1)R	2	-0.45707	2	1.27	1.24	1.327	0.965	1.031	0.938	0.608	0.615	0.483
CSA020316.1	20	K	pectinesterase-like	3	3	1	2.492e-51	207.39	NQNTGIVIQK(1)CR	2	-0.28538	2	1	1.74966e-37	197.15	NQNTGIVIQK(1)CR	2	-0.80894	3	1	3.82678e-22	191.53	NQNTGIVIQK(1)CR	2	-0.12461	2	1.447	1.496	1.354	0.915	0.92	0.898	0.328	0.279	0.477	1.288	1.25	1.295	1.055	1.03	1.051	0.531	0.621	0.535	1.12345	1.1968	1.04556	0.867299	0.893204
CSA020450.1	67	K	heterogeneous nuclear ribonucleoprotein 1 isoform X3	3	3	1	0.01129	66.568	EK(1)HNIDGR	3	0.53063	1	1	0.00220125	88.181	EK(1)HNIDGR	3	1.0573	1	1	0.0251818	54.191	EK(1)HNIDGR	3	-0.18472	1	1.035	1.055	1.059	0.991	0.965	0.994	1.032	1.026	0.963
CSA020501.1	44	K	proteasome subunit beta type-3-A	3	3	1	0.0184169	68.016	IYK(1)IHDK	3	0.085486	1	1	0.0277536	58.981	IYK(1)IHDK	3	0.96798	1	1	0.0239556	61.962	IYK(1)IHDK	3	0.68124	1	1.173	1.188	1.181	1.077	1.042	1.091	0.66	0.695	0.589	1.022	1.091	1.063	1.037	1.04	1.042	0.904	0.822	0.874	1.14775	1.08891	1.11101	1.03857	1.00192
CSA020573.1	39	K	aspartate carbamoyltransferase 3, chloroplastic-like isoform X2	3	2	1	0.0150821	68.525	LSFESAMK(1)R	2	0.84086	1	1	0.00354322	82.008	LSFESAMK(1)R	2	2.0221	1	1	0.00789814	72.096	LSFESAMK(1)R	2	1.5116	1	0.969	0.933		1.255	1.175		0.837	1.004
CSA020576.1	166	K	peroxisomal membrane protein 11C	3	3	1	0.00209549	98.458	HK(1)NEQYR	3	0.98044	1	1	0.00191374	98.458	HK(1)NEQYR	3	2.7447	1	1	0.00376938	93.561	HK(1)NEQYR	3	1.2523	2	0.854	0.926	0.769	1.075	1.057	1.135	1.28	1.154	1.382		0.601	0.676		1.076	0.918		1.47	1.536		1.54077	1.13757		0.982342
CSA020587.1	152	K	ribulose bisphosphate carboxylase small chain, chloroplastic isoform X1	3	3	1	0.00857313	93.467	EYPK(1)AFVR	2	0.55062	1	1	0.00146364	113.66	EYPK(1)AFVR	2	1.5572	1	1	0.00168663	111.82	EYPK(1)AFVR	2	0.92107	1	0.572	0.556	0.469	1.101	1.078	1.143	1.795	1.801	1.987	0.507	0.568	0.5	1.228	1.18	1.185	1.287	1.266	1.332	1.12821	0.978873	0.938	0.89658	0.913559
CSA020590.1	125	K	17.3 kDa class I heat shock protein-like	3	3	1	7.34754e-05	113.76	LPENAK(1)VDQVK	2	-0.051919	3	1	2.76198e-09	146.79	LPENAK(1)VDQVK	2	-0.94369	2	1	5.99423e-06	148.96	LPENAK(1)VDQVK	2	0.76522	2	1.05	1.138	1.161	0.704	0.611	0.487	1.351	1.287	1.401
CSA020605.1	60	K	ribulose bisphosphate carboxylase large chain (chloroplast)	3	3	1	0.000450312	123.79	YGRPLLGCTIK(1)PK	2	-0.37773	8	1	0.000968307	115.57	YGRPLLGCTIK(1)PK	3	-1.359	7	1	0.000218016	131.82	YGRPLLGCTIK(1)PK	3	-1.7549	7	0.616	0.602	0.571	1.367	1.416	1.442	1.383	1.324	1.397	0.291	0.364	0.326	0.861	0.875	0.899	2.103	1.939	2.036	2.11684	1.65385	1.75153	1.58769	1.61829
CSA020605.1	300	K	ribulose bisphosphate carboxylase large chain (chloroplast)	3	3	1	0.00136488	77.26	EIK(1)FEFPAMDTL	2	-0.97271	2	1	0.00113066	81.239	EIK(1)FEFPAMDTL	2	-0.99316	3	1	6.54763e-05	104.59	EIK(1)FEFPAMDTL	2	0.074456	3	0.444	0.465	0.504	0.959	1.045	1.101	2.212	2.005	1.968	0.291	0.364	0.326	0.861	0.875	0.899	2.103	1.939	2.036	1.52577	1.27747	1.54601	1.11382	1.19429
CSA020638.1	513	K	uncharacterized protein LOC100252823 isoform X1	3	2	1	0.00728227	69.65	GVANGAQK(1)FK	3	-2.1562	2	1	0.000695571	118.03	GVANGAQK(1)FK	3	-0.60926	2	1	1.38944e-06	157.66	GVANGAQK(1)FK	2	-1.827	3		1.464	1.503		0.873	0.717		0.39	0.402
CSA020638.1	635	K	uncharacterized protein LOC100252823 isoform X1	3	2	1	0.0140212	68.214	TGRPLK(1)K	3	1.799	1	1	0.0377445	67.169	TGRPLK(1)K	3	0.62534	1	1	0.0384389	67.981	TGRPLK(1)K	3	1.5947	1	1.33		1.235	0.973		0.978	0.484		0.621
CSA020775.1	248	K	uncharacterized oxidoreductase At4g09670-like	3	3	1	1.87777e-06	134.56	K(1)TQLVLDAVK	3	1.0612	3	1	0.00204981	104.17	K(1)TQLVLDAVK	2	1.8467	1	1	0.000713359	118.76	K(1)TQLVLDAVK	2	2.0711	1	0.745	0.865	0.729	1.122	1.002	1.084	1.434	1.329	1.528	0.828	0.825	0.849	0.969	1.077	1.049	1.271	1.159	1.105	0.899758	1.04848	0.858657	1.15789	0.930362
CSA020777.1	97	K	uncharacterized oxidoreductase At4g09670	3	3	1	0.00124621	85.676	WAVLAAEK(1)K	3	1.443	1	1	0.000845015	94.692	WAVLAAEK(1)K	2	-0.92477	2	1	0.000686666	117.7	WAVLAAEK(1)K	2	-0.9773	2	0.812	0.807	0.801	1.223	1.233	1.283	1.181	1.165	1.125	0.818	0.808	0.824	1.053	1.069	1.096	1.131	1.181	1.139	0.992665	0.998762	0.972087	1.16144	1.15341
CSA020793.1	110	K	uncharacterized protein LOC100245365 isoform X1	3	3	1	8.61062e-27	178.68	LHSGVETK(1)AK(1)SSR	3	0.91447	7	1	1.14067e-17	166.9	LHSGVETK(1)AK(1)SSR	3	1.4885	9	1	9.85949e-16	175.6	LHSGVETK(1)AK(1)SSR	2	0.54817	8	1.173	1.178	1.137	0.988	0.997	0.993	0.768	0.767	0.804
CSA020793.1	112	K	uncharacterized protein LOC100245365 isoform X1	3	3	1	8.61062e-27	178.68	LHSGVETK(1)AK(1)SSR	3	0.91447	6	1	1.14067e-17	166.9	LHSGVETK(1)AK(1)SSR	3	1.4885	7	1	9.85949e-16	175.6	LHSGVETK(1)AK(1)SSR	2	0.54817	5	1.171	1.203	1.159	0.99	0.998	1.001	0.771	0.719	0.746
CSA020793.1	1404	K	uncharacterized protein LOC100245365 isoform X1	3	3	1	8.06116e-120	259.49	SDDITVDSTVSGERPVSGK(1)R	3	1.0983	1	1	3.76973e-26	145.82	SDDITVDSTVSGERPVSGK(1)R	3	1.473	1	1	3.27316e-58	221.85	SDDITVDSTVSGERPVSGK(1)R	3	1.0284	1	1.439	1.458	1.389	0.829	0.865	0.845	0.447	0.412	0.474
CSA020890.1	60	K	histone H1.1-like	3	2	1	0.00409045	116.73	FIEEK(1)QK	2	0.87671	1	1	0.00705742	101.54	FIEEK(1)QK	2	0.14633	1	1	0.016722	91.069	FIEEK(1)QK	2	1.0026	1	0.935	0.863		1.492	1.55		0.615	0.695
CSA020900.1	15	K	uncharacterized protein LOC105645584	3	3	1	0.0161725	67.981	PLDIHK(1)K	3	0.51502	1	1	0.0222042	60.76	PLDIHK(1)K	3	0.74815	1	1	0.0171536	64.757	PLDIHK(1)K	3	0.1389	1	1.041	1.096	1.039	0.948	0.976	0.96	1.073	0.939	1.048
CSA020900.1	243	K	uncharacterized protein LOC105645584	3	2	1	0.0176669	73.502	ENNVQSFEK(1)LR	2	0.74354	1	1	3.97843e-06	132.99	ENNVQSFEK(1)LR	2	0.80137	1	1	2.60782e-05	111.31	RENNVQSFEK(1)LR	3	0.7778	2		1.296	1.019		0.816	0.908		0.763	1.156
CSA020950.1	181	K	uncharacterized protein LOC100249654	3	3	1	7.69092e-10	152.97	AVEYFLK(1)QK	2	-1.6843	2	1	0.000502806	127.76	AVEYFLK(1)QK	3	0.65331	2	1	0.00106537	115.78	AVEYFLK(1)QK	2	2.9204	2	1.213	1.167	1.107	1.03	0.998	1.045	0.639	0.786	0.799	1.039	1.062	1.044	0.971	1.014	1.029	1.003	0.939	0.961	1.16747	1.09887	1.06034	1.06076	0.984221
CSA020960.1	225	K	30S ribosomal protein S3 (chloroplast)	3	3	1	2.57618e-14	162.25	NYVQK(1)NLR	2	0.22597	1	1	0.00131416	115.49	NYVQK(1)NLR	3	1.5149	2	1	0.00365648	100.02	NYVQK(1)NLR	2	0.4452	1	0.795	0.88	0.784	1.459	1.399	1.514	0.925	0.84	0.861	0.618	0.643	0.686	1.266	1.327	1.259	1.205	1.113	1.132	1.28641	1.36858	1.14286	1.15245	1.05426
CSA020996.1	87	K	far upstream element-binding protein 1	3	3	1	0.0115196	72.848	LFNNAEAK(1)R	2	4.1384	1	1	0.00651203	76.416	LFNNAEAK(1)R	2	1.708	1	1	0.00317819	84.687	LFNNAEAK(1)R	2	2.1109	1	1.036	1.102	1.075	1.026	1.035	0.978	0.989	0.86	0.949	1.155	1.117	1.158	0.962	0.987	0.964	0.832	0.837	0.82	0.89697	0.986571	0.928325	1.06653	1.04863
CSA021019.1	337	K	methylmalonate-semialdehyde dehydrogenase	3	2	1	0.0204686	76.332	SWEDK(1)LVER	2	2.4163	1	1	0.00155955	86.114	SWEDK(1)LVER	2	1.9466	1	1	0.00608955	81.625	SWEDK(1)LVER	2	1.4238	1	1.17		1.119	1.017		1.168	0.74		0.617	0.998	0.989	1.008	1.022	1.004	1.083	0.955	0.967	0.93	1.17234		1.11012	0.995108
CSA021029.1	451	K	1,4-alpha-glucan-branching enzyme 2-2, chloroplastic/amyloplastic isoform X2	3	3	1	0.00678431	83.614	YVFK(1)HPR	3	0.46791	1	1	0.0138834	71.715	YVFK(1)HPR	3	0.21797	1	1	0.00357571	94.407	YVFK(1)HPR	3	-0.50862	1	0.89	0.937	0.913	1.224	1.179	1.145	1.03	0.993	1.07	1.009			0.856			1.143			0.882061			1.42991
CSA021087.1	183	K	phospho-2-dehydro-3-deoxyheptonate aldolase 2, chloroplastic	3	2	1	0.00851961	60.255	SDPFEEK(1)DGVK	3	-1.9898	1	1	0.0324275	61.11	SDPFEEK(1)DGVK	2	1.5876	1	1	0.00045081	112.5	SDPFEEK(1)DGVK	2	1.0086	1		0.985	1.576		0.791	0.575		1.356	0.434	1.067	1.066	1.093	0.997	0.983	1.008	0.869	0.882	0.872		0.924015	1.4419		0.80468
CSA021114.1	165	K	ubiquitin-activating enzyme E1 1-like	3	3	1	0.000935628	121.35	VLNFK(1)SLR	2	1.1882	1	1	0.0114848	87.258	VLNFK(1)SLR	2	1.5407	1	1	0.0232219	74.173	VLNFK(1)SLR	2	0.88469	1	1.053	1.026	1.206	0.976	0.963	0.977	1.015	1.083	0.682	1.121	1.175	1.164	0.965	0.947	0.955	0.88	0.772	0.806	0.93934	0.873191	1.03608	1.0114	1.0169
CSA021114.1	242	K	ubiquitin-activating enzyme E1 1-like	3	2	1	0.0123968	79.286	VEDINPK(1)LLR	2	0.9492	1	1	0.0029688	104.14	VEDINPK(1)LLR	2	0.37466	1	1	5.94345e-06	92.611	VEDINPK(1)LLR	2	2.1973	1	0.91	1.004		1.063	1.02		1.187	1.055		1.121	1.175	1.164	0.965	0.947	0.955	0.88	0.772	0.806	0.811775	0.854468		1.10155	1.07709
CSA021126.1	43	K	6-phosphogluconate dehydrogenase, decarboxylating 1, chloroplastic	3	3	1	5.04527e-07	134.04	TTSK(1)VDDTLDR	2	-0.24061	1	1	1.77225e-30	199.96	TTSK(1)VDDTLDR	2	0.48306	1	1	0.000124819	141.54	TTSK(1)VDDTLDR	2	0.081102	1	1.031	0.95	0.954	1.222	1.324	1.327	0.758	0.798	0.754	0.924	0.92	0.933	1.132	1.101	1.118	0.971	1.013	0.942	1.1158	1.03261	1.02251	1.07951	1.20254
CSA021143.1	515	K	apoptotic chromatin condensation inducer in the nucleus-like isoform X1	3	3	1	1.18483e-17	147.51	IHDQEVVGNNETSK(1)R	3	-0.45536	1	1	1.82246e-22	167.56	IHDQEVVGNNETSK(1)R	3	0.022488	1	1	1.27252e-14	143.93	IHDQEVVGNNETSK(1)R	3	-0.0088892	1	1.174	1.114	1.058	0.871	0.947	0.918	0.909	0.942	1.061	1.066	1.064	1.096	1.108	1.103	1.104	0.824	0.823	0.819	1.10131	1.04699	0.965328	0.786101	0.858568
CSA021155.1	47	K	60S ribosomal protein L15-like	3	3	1	0.00211497	73.435	VNHPTRPDK(1)AR	3	1.2723	2	1	0.0125311	52.391	VNHPTRPDK(1)AR	4	-1.0602	2	1	0.000931898	84.198	VNHPTRPDK(1)AR	4	-0.80925	2	1.877	1.793	1.791	0.298	0.41	0.307	0.247	0.333	0.333	1.997	2.046	2.136	0.35	0.278	0.283	0.291	0.333	0.189	0.93991	0.876344	0.838483	0.851429	1.47482
CSA021155.1	236	K	60S ribosomal protein L15-like	3	3	1	0.000427165	83.182	INWICNPVHK(1)HR	3	1.1435	1	1	4.70569e-05	99.5	INWICNPVHK(1)HR	3	0.20599	2	1	0.000763957	77.124	INWICNPVHK(1)HR	4	0.60235	2	1.151	1.019	1.108	0.751	0.786	0.761	1.103	1.302	1.16	1.997	2.046	2.136	0.35	0.278	0.283	0.291	0.333	0.189	0.576365	0.498045	0.518727	2.14571	2.82734
CSA021155.1	262	K	60S ribosomal protein L15-like	3	3	1	2.08792e-09	155	GHLNHK(1)AR	2	-0.75799	4	1	2.65741e-07	159.04	GHLNHK(1)AR	2	-0.56883	5	1	3.30109e-05	140.09	GHLNHK(1)AR	2	0.21989	4	2.102	2.1	2.013	0.137	0.148	0.163	0.01	0.081	0.059	1.997	2.046	2.136	0.35	0.278	0.283	0.291	0.333	0.189	1.05258	1.02639	0.942416	0.391429	0.532374
CSA021191.1	156	K	annexin D1	3	3	1	1.97521e-07	135.02	DAVLANEATK(1)R	2	-1.627	2	1	0.00288275	79.089	DAVLANEATK(1)R	2	-0.65257	1	1	0.000140443	104.17	DAVLANEATK(1)R	2	-0.68491	5	1.517	1.148	1.198	0.724	0.941	0.849	0.426	0.886	0.861	1.617	1.562	1.578	0.739	0.771	0.75	0.46	0.493	0.471	0.938157	0.734955	0.759189	0.979702	1.22049
CSA021191.1	190	K	annexin D1	3	3	1	0.000206033	71.402	K(1)SLEEDVAHHTTGDFR	3	-2.0891	2	1	3.69333e-13	113.88	K(1)SLEEDVAHHTTGDFR	3	-0.58243	1	1	1.05805e-05	77.505	K(1)SLEEDVAHHTTGDFR	3	-0.36652	2	1.153	1.311	1.102	0.833	0.894	0.95	0.996	0.645	0.929	1.617	1.562	1.578	0.739	0.771	0.75	0.46	0.493	0.471	0.713049	0.839309	0.698352	1.1272	1.15953
CSA021191.1	240	K	annexin D1	3	3	1	1.27303e-06	140.78	ILHENISK(1)K	2	-0.16357	3	1	1.26642e-18	185.08	ILHENISK(1)K	4	-1.1525	4	1	2.47914e-05	143.5	ILHENISK(1)K	4	-0.54028	4	1.373	1.499	1.429	0.753	0.771	0.77	0.669	0.447	0.487	1.617	1.562	1.578	0.739	0.771	0.75	0.46	0.493	0.471	0.849103	0.959667	0.905577	1.01894	1
CSA021191.1	241	K	annexin D1	3	3	1	1.02016e-10	128.01	K(1)HYSNEDLIR	3	1.6318	2	1	3.83973e-05	127.51	K(1)HYSNEDLIR	3	0.61111	2	1	0.000125735	100.88	K(1)HYSNEDLIR	3	1.6356	2	1.075	1.046	1.005	0.94	1.018	0.972	1.018	0.981	1.101	1.617	1.562	1.578	0.739	0.771	0.75	0.46	0.493	0.471	0.664811	0.669654	0.636882	1.27199	1.32036
CSA021191.1	315	K	annexin D1	3	3	1	0.00111354	111.46	VLQLAINK(1)R	2	-1.0813	3	1	0.000785188	120.99	VLQLAINK(1)R	3	0.41785	4	1	2.12051e-06	145.72	VLQLAINK(1)R	3	-0.20753	3	1.24	1.169	1.189	0.796	0.804	0.856	0.874	1.008	0.871	1.617	1.562	1.578	0.739	0.771	0.75	0.46	0.493	0.471	0.766852	0.748399	0.753485	1.07713	1.0428
CSA021195.1	302	K	alpha-mannosidase 2	3	3	1	0.00631451	82.671	THYELK(1)K	3	-1.4088	2	1	0.00460253	86.794	THYELK(1)K	3	-0.062945	2	1	0.0104263	73.616	THYELK(1)K	3	-0.67654	1	1.073	1.058	1.141	0.997	1.081	0.984	0.952	0.889	0.807	1.287	1.197	1.139	0.971	0.989	0.967	0.634	0.748	0.777	0.833722	0.883876	1.00176	1.02678	1.09302
CSA021325.1	647	K	increased DNA methylation 1-like	3	3	1	0.00296504	99.688	TFGSTTK(1)R	2	-1.2429	1	1	0.0130619	80.165	TFGSTTK(1)R	2	-1.1763	1	1	0.00128621	110.76	TFGSTTK(1)R	2	-0.60032	2	1.514	1.4	1.426	0.683	0.75	0.735	0.479	0.649	0.536
CSA021329.1	106	K	aspartic proteinase nepenthesin-1-like	3	3	1	0.0012894	93.143	LGPIGQPK(1)R	3	0.31865	2	1	0.00265936	96.027	LGPIGQPK(1)R	2	-1.2228	1	1	0.000346851	101.72	LGPIGQPK(1)R	3	0.9135	2	1.239	1.232	1.187	0.977	0.929	0.96	0.655	0.748	0.743	1.231	1.416	1.54	0.924	0.95	0.911	0.762	0.478	0.35	1.0065	0.870056	0.770779	1.05736	0.977895
CSA021373.1	518	K	ABC transporter E family member 2	3	3	1	0.0068162	81.381	FILHAK(1)K	3	0.77803	2	1	0.0168024	64.803	FILHAK(1)K	3	0.84975	2	1	0.00377937	89.673	FILHAK(1)K	3	0.49603	2	1.219	1.138	1.088	1.005	1.013	0.945	0.66	0.82	0.966	1.137	1.124	1.152	1.006	1.007	1.009	0.775	0.828	0.741	1.07212	1.01246	0.944444	0.999006	1.00596
CSA021392.1	473	K	pyrophosphate--fructose 6-phosphate 1-phosphotransferase subunit alpha	3	3	1	0.00805911	95.523	GK(1)SYELLR	2	0.48799	1	1	0.00957893	89.08	GK(1)SYELLR	2	0.6575	1	1	0.00272778	103.88	GK(1)SYELLR	2	1.2469	2	1.346	1.325	1.202	0.738	0.767	0.778	0.738	0.767	0.945	1.444	1.7	1.669	0.757	0.667	0.685	0.591	0.379	0.416	0.932133	0.779412	0.720192	0.974901	1.14993
CSA021446.1	17	K	60S ribosomal protein L8-like	3	2	1	1.88129e-06	106.26	GAGSVFK(1)SHTHHR	4	-3.4903	2	1	0.000214478	78.964	GAGSVFK(1)SHTHHR	4	-1.8542	2	1	8.31812e-06	100.38	GAGSVFK(1)SHTHHR	4	0.79958	2		1.102	1.195		0.91	1.002		1.007	0.671	1.649	1.583	1.602	0.666	0.668	0.684	0.545	0.545	0.52		0.696147	0.745943		1.36228
CSA021446.1	155	K	60S ribosomal protein L8-like	3	1	1	0.028837	75.738	LPSGAK(1)K	3	0.43312	2	1	0.000130596	93.096	IKLPSGAK(1)K	3	-0.71005	1	0.999994	0.00308578	68.847	IKLPSGAK(1)K	3	-0.0011009	1	1.651			0.578			0.345			1.649	1.583	1.602	0.666	0.668	0.684	0.545	0.545	0.52	1.00121			0.867868
CSA021446.1	188	K	60S ribosomal protein L8-like	3	3	1	0.000443221	120.99	AGNAYHK(1)YR	2	-1.3584	3	1	4.77273e-09	158.76	AGNAYHK(1)YR	2	-1.3853	3	1	0.000218535	133.13	AGNAYHK(1)YR	2	-1.1443	3	1.822	1.904	1.744	0.387	0.372	0.412	0.245	0.176	0.294	1.649	1.583	1.602	0.666	0.668	0.684	0.545	0.545	0.52	1.10491	1.20278	1.08864	0.581081	0.556886
CSA021472.1	47	K	multiprotein-bridging factor 1b	3	3	1	0.00106777	108.35	AGAEIETIK(1)K	2	0.26699	1	1	0.000660283	116.55	AGAEIETIK(1)K	2	-0.65251	1	1	0.000770919	116.55	AGAEIETIK(1)K	2	0.67932	1	1.267	1.372	1.34	0.78	0.741	0.742	0.841	0.713	0.705	1.554	1.45	1.505	0.736	0.801	0.721	0.518	0.592	0.602	0.815315	0.946207	0.890365	1.05978	0.925094
CSA021499.1	215	K	tryptophan synthase beta chain 1	3	3	1	0.0391448	66.758	ASFDQK(1)PYR	2	0.12197	1	1	0.00395016	91.658	ASFDQK(1)PYR	2	-0.63811	1	1	0.00546853	82.831	ASFDQK(1)PYR	2	-0.27359	1	1.044	1.095	1.052	1.006	1.047	1.032	0.997	0.859	0.929	0.968	0.966	1.04	1.049	1.004	0.999	1.001	1.002	0.946	1.07851	1.13354	1.01154	0.959009	1.04283
CSA021564.1	53	K	acetyl-CoA acetyltransferase, cytosolic 1 isoform X1	3	3	1	6.0211e-18	170.95	LGSIAIGSALK(1)R	2	1.198	3	1	9.35256e-07	127.71	LGSIAIGSALK(1)R	3	-0.38467	4	1	1.50227e-10	164.13	LGSIAIGSALK(1)R	3	-0.22624	3	1.086	1.086	1.134	0.829	0.825	0.799	1.131	1.134	1.057	1.256	1.274	1.29	0.797	0.795	0.784	0.805	0.852	0.778	0.86465	0.852433	0.87907	1.04015	1.03774
CSA021635.1	393	K	asparagine--tRNA ligase, cytoplasmic 1	3	3	1	0.00352372	103.21	NFDK(1)SAIDR	2	-0.16981	1	1	0.00379447	99.5	NFDK(1)SAIDR	2	-1.2153	1	1	0.00441057	84.884	NFDK(1)SAIDR	2	-0.64495	1	1.048	1.08	1.052	1.007	0.996	1.033	0.987	0.944	0.927	1.134	1.122	1.115	0.961	0.943	0.985	0.824	0.881	0.877	0.924162	0.962567	0.943498	1.04787	1.0562
CSA021635.1	450	K	asparagine--tRNA ligase, cytoplasmic 1	3	3	1	0.00086605	122.28	YLTEVK(1)FK	2	3.0198	1	1	0.00169992	110.76	YLTEVK(1)FK	3	-1.0943	2	1	0.000542695	126.07	YLTEVK(1)FK	2	1.9493	1	1.122	1.096	1.042	1.195	1.304	1.263	0.614	0.556	0.654	1.134	1.122	1.115	0.961	0.943	0.985	0.824	0.881	0.877	0.989418	0.976827	0.934529	1.2435	1.38282
CSA021639.1	182	K	endo-1,3;1,4-beta-D-glucanase	3	3	1	0.00135273	96.342	MSPPELVK(1)K	2	-0.39042	3	1	0.00359998	81.335	MSPPELVK(1)K	3	-0.50838	2	1	0.000998728	99.568	MSPPELVK(1)K	2	0.72211	3	0.808	0.79	0.77	0.97	1.04	1.053	1.496	1.419	1.482	0.705	0.665	0.723	0.923	0.929	0.933	1.488	1.513	1.448	1.1461	1.18797	1.06501	1.05092	1.11948
CSA021672.1	140	K	villin-4	3	3	1	0.0225077	55.37	GK(1)HVVHVK	4	2.3386	1	1	0.0073399	71.692	GK(1)HVVHVK	3	1.0444	2	1	0.00616001	71.379	GK(1)HVVHVK	4	0.64046	2	1.364	1.453	1.458	0.99	0.977	0.945	0.397	0.291	0.203	1.137	1.135	1.115	1.024	1.017	1.028	0.779	0.785	0.798	1.19965	1.28018	1.30762	0.966797	0.960669
CSA021703.1	168	K	protein BOBBER 1	3	3	1	0.00255737	103.55	EIACEMK(1)K	3	-4.1078	2	1	0.00275564	99.815	EIACEMK(1)K	3	-2.0716	2	1	0.00120768	111.61	EIACEMK(1)K	3	-2.6284	3	1.561	1.573	1.568	0.686	0.702	0.642	0.386	0.393	0.362	1.406	1.432	1.432	0.762	0.813	0.786	0.603	0.577	0.57	1.11024	1.09846	1.09497	0.900262	0.863469
CSA021707.1	177	K	50S ribosomal protein L13, chloroplastic-like	3	3	1	2.58082e-08	84.249	HSGRPGGMTVETFDQLQK(1)R	4	0.79108	1	1	1.76319e-10	99.044	HSGRPGGMTVETFDQLQK(1)R	3	-1.0699	2	1	2.63592e-22	122.44	HSGRPGGMTVETFDQLQK(1)R	3	1.3804	2	0.963	0.891	0.823	0.951	1.098	1.043	1.221	1.168	1.387	0.633	0.712	0.658	1.214	1.238	1.256	1.171	1.165	1.12	1.52133	1.2514	1.25076	0.783361	0.886914
CSA021713.1	347	K	uncharacterized protein LOC108994897 isoform X3	3	3	1	0.00355271	112.13	QVEELK(1)SK	2	-1.8834	1	1	0.00363974	100.88	QVEELK(1)SK	2	-0.31386	1	1	0.00328928	100.88	QVEELK(1)SK	2	-0.63564	1	1.242	1.221	1.231	0.935	0.998	0.957	0.7	0.687	0.655	1.112	1.11	1.122	1.044	1.035	1.041	0.777	0.793	0.782	1.11691	1.1	1.09715	0.895594	0.964251
CSA021722.1	56	K	vesicle-associated membrane protein 711	3	3	1	0.00399227	88.643	YIFHVK(1)R	3	0.19506	2	1	0.00457325	86.866	YIFHVK(1)R	3	-1.074	2	1	0.00445297	86.512	YIFHVK(1)R	3	0.084727	2	0.7	0.811	0.873	0.947	0.863	0.913	1.734	1.588	1.45	1.337		1.083	0.888		0.993	0.655		0.893	0.52356		0.806094	1.06644
CSA021733.1	255	K	ribose-phosphate pyrophosphokinase 1-like isoform X2	3	3	1	5.60126e-08	134.61	LSDAPLAIVDK(1)R	2	-1.3425	4	1	0.000120574	103.11	LSDAPLAIVDK(1)R	2	-0.82386	2	1	1.86486e-05	127.71	LSDAPLAIVDK(1)R	3	-0.47963	3	0.936	0.929	1.011	0.995	1.035	1.038	1.219	1.175	1.007			0.953			1.034			1.029			1.06086
CSA021739.1	94	K	uncharacterized protein At5g02240	3	3	1	0.00355271	112.13	DFK(1)ALFSK	2	-0.023266	1	1	0.00464564	97.813	DFK(1)ALFSK	2	-2.0754	1	1	0.00328928	100.88	DFK(1)ALFSK	2	-1.0668	1	0.412	0.423	0.393	1.314	1.332	1.345	1.843	1.746	1.886	0.478	0.546	0.558	1.333	1.263	1.2	1.376	1.343	1.278	0.861925	0.774725	0.704301	0.985746	1.05463
CSA021739.1	99	K	uncharacterized protein At5g02240	3	3	1	0.0124301	81.771	ALFSK(1)ITTR	2	0.92526	2	1	0.0193615	71.221	ALFSK(1)ITTR	2	-2.9811	1	1	0.000265231	130.63	ALFSK(1)ITTR	2	-1.1034	1	0.68	0.719	0.576	1.291	1.142	1.398	1.352	1.431	1.44	0.478	0.546	0.558	1.333	1.263	1.2	1.376	1.343	1.278	1.42259	1.31685	1.03226	0.968492	0.904196
CSA021740.1	27	K	MLP-like protein 328	3	2	1	0.000444094	75.102	SDGDEILHMFGGK(1)K	3	0.16354	2	1	1.29422e-05	84.297	SDGDEILHMFGGK(1)K	4	1.7653	2	1	0.0410459	40.315	SDGDEILHMFGGK(1)K	3	-1.3979	1	0.778	0.561		0.951	1.098		1.577	1.768		0.447	0.427	0.454	1.075	1.068	1.101	1.722	1.657	1.66	1.74049	1.31382		0.884651	1.02809
CSA021766.1	260	K	50S ribosomal protein L15, chloroplastic	3	3	1	0.00102511	115.71	AEEYFAK(1)K	2	2.0601	1	1	0.000895503	115.71	AEEYFAK(1)K	2	3.2959	2	1	0.000828403	115.71	AEEYFAK(1)K	2	2.6014	2	1.154	1.098	1.08	1.167	1.151	1.108	0.588	0.732	0.773	1.101	0.988	1.253	1.083	1.054	1.005	0.792	1.034	0.793	1.04814	1.11134	0.861931	1.07756	1.09203
CSA021786.1	613	K	protein transport protein SEC31 homolog B isoform X2	3	3	1	0.0017225	65.565	DQYLK(1)TSHSPYLK	3	-1.4365	1	1	5.92709e-05	89.992	DQYLK(1)TSHSPYLK	3	-1.8042	1	1	7.89772e-05	86.498	DQYLK(1)TSHSPYLK	3	-1.8583	2	0.939	1.143	1.059	0.961	1.012	1.04	1.256	0.813	0.904	1.109	1.195	1.099	1.013	1.033	1.006	0.909	0.757	0.848	0.846709	0.956485	0.963603	0.948667	0.979671
CSA021791.1	385	K	alcohol dehydrogenase class-3	3	3	1	0.0104554	81.625	GTAFGGFK(1)SR	2	-0.20795	1	1	0.0193716	69.261	GTAFGGFK(1)SR	2	0.28657	1	1	0.00603513	80.245	GTAFGGFK(1)SR	2	0.63048	1	0.98	0.962	0.936	1.202	1.198	1.204	0.883	0.923	0.946	0.878	0.886	0.894	1.066	1.039	1.09	1.077	1.083	1.073	1.11617	1.08578	1.04698	1.12758	1.15303
CSA021804.1	14	K	60S ribosomal protein L35-like	3	3	1	0.00556461	88.021	SK(1)AELLAQLK	2	0.31651	1	1	0.00100971	116.24	SK(1)AELLAQLK	2	0.15032	2	1	0.00110592	116.24	SK(1)AELLAQLK	2	1.1742	2	1.708	1.832	1.8	0.384	0.344	0.293	0.471	0.34	0.33	1.998	1.886	1.958	0.365	0.457	0.411	0.304	0.361	0.311	0.854855	0.971368	0.919305	1.05205	0.752735
CSA021807.1	117	K	polyadenylate-binding protein 2-like	3	3	1	0.00261094	87.216	K(1)SGTANIFIK	3	-2.6626	2	1	0.00203316	104.59	K(1)SGTANIFIK	2	-2.6125	1	1	0.000437798	129.34	K(1)SGTANIFIK	3	-0.97912	2	1.226	1.382	1.366	0.803	0.701	0.776	0.892	0.741	0.609	1.335	1.283	1.317	0.838	0.83	0.812	0.674	0.79	0.725	0.918352	1.07716	1.03721	0.958234	0.844578
CSA021807.1	126	K	polyadenylate-binding protein 2-like	3	3	1	0.000117278	85.837	SGTANIFIK(1)NLDK	3	-0.73109	1	1	0.000125348	85.837	SGTANIFIK(1)NLDK	3	0.21545	1	1	0.000104476	84.753	SGTANIFIK(1)NLDK	3	0.84452	1	0.916	1.118	1.021	1.036	0.915	0.883	1.206	0.97	1.183	1.335	1.283	1.317	0.838	0.83	0.812	0.674	0.79	0.725	0.686142	0.871395	0.775247	1.23628	1.10241
CSA021873.1	172	K	glutamate--tRNA ligase, cytoplasmic isoform X1	3	3	1	0.0013415	95.775	VTSAYVGK(1)R	2	2.7218	2	1	0.00324581	85.533	VTSAYVGK(1)R	2	2.0875	2	1	0.00077543	107.08	VTSAYVGK(1)R	2	3.2732	2	1.196	1.176	1.139	1.064	1.034	0.972	0.632	0.728	0.824	1.231	1.168	1.203	0.942	0.922	0.918	0.84	0.868	0.851	0.971568	1.00685	0.9468	1.12951	1.12148
CSA021931.1	130	K	uncharacterized protein LOC100245159	3	2	1	0.00157378	114.24	IQVVK(1)IDTEK	2	1.3283	1	1	0.00296303	104.24	IQVVK(1)IDTEK	2	1.0372	1	1	0.0295911	63.091	IQVVK(1)IDTEK	2	-0.010638	1	0.594	0.594		1.232	1.286		1.59	1.489		0.706	0.704	0.715	1.148	1.191	1.217	1.232	1.173	1.181	0.84136	0.84375		1.07317	1.07976
CSA021951.1	328	K	30S ribosomal protein S1, chloroplastic	3	3	1	0.00992393	90.709	VSLSTK(1)K	2	1.2588	1	1	0.0161262	87.476	VSLSTK(1)K	2	0.13845	1	1	0.0206198	80.219	VSLSTK(1)K	3	0.037967	2	0.726	0.83	0.62	1.264	1.21	1.345	1.297	1.15	1.416	0.651	0.684	0.637	1.245	1.251	1.293	1.194	1.172	1.207	1.11521	1.21345	0.973312	1.01526	0.967226
CSA021954.1	247	K	thiamine thiazole synthase 2, chloroplastic-like	3	3	1	1.00552e-29	154.31	VVVSSCGHDGPFGATGVK(1)R	3	-0.44764	2	1	1.66957e-16	115.91	VVVSSCGHDGPFGATGVK(1)R	3	-0.98223	1	1	8.54306e-37	188.1	VVVSSCGHDGPFGATGVK(1)R	3	-1.6456	1	1.249	1.452	1.247	0.748	0.74	0.988	0.916	0.569	0.583
CSA021995.1	1998	K	uncharacterized protein LOC100266068 isoform X2	3	3	1	2.3508e-11	123.4	EKDPSSQGDTPQEK(1)R	3	-1.4208	3	1	5.60945e-10	119.92	EKDPSSQGDTPQEK(1)R	3	-1.6896	3	1	2.61441e-12	123.4	EKDPSSQGDTPQEK(1)R	3	-1.5516	1	1.192	1.263	1.069	1.222	1.153	1.512	0.448	0.431	0.281	1.174	1.277	1.318	1	1.041	1.057	0.73	0.54	0.488	1.01533	0.989037	0.811077	1.222	1.10759
CSA022024.1	429	K	phenylalanine ammonia-lyase G4	3	3	1	0.0108734	73.632	NTVSQVAK(1)R	2	-1.4735	1	1	0.00258835	102.53	NTVSQVAK(1)R	2	-1.2675	1	1	0.000535544	121.61	NTVSQVAK(1)R	2	-0.93176	2	0.944	0.962	0.926	1.29	1.304	1.28	0.843	0.801	0.871		0.914			1.242			0.857			1.05252			1.04992
CSA022065.1	128	K	probable Xaa-Pro aminopeptidase P isoform X1	3	3	1	0.0212861	55.37	WEHAFAK(1)K	3	-0.09056	1	1	0.00726409	71.379	WEHAFAK(1)K	3	-1.4671	1	1	0.0036591	79.474	WEHAFAK(1)K	3	-1.403	1	1.012	1.078	0.941	1.08	0.983	1.037	0.969	0.965	1.15	1.054	1.013	1.027	1.022	1.044	1.047	0.898	0.907	0.903	0.960152	1.06417	0.916261	1.05675	0.941571
CSA022079.1	85	K	alpha-xylosidase 1-like	3	3	1	0.00130256	94.114	VHITDK(1)QK	3	-0.78882	1	1	0.00984384	68.383	VHITDK(1)QK	3	0.78377	1	1	0.00307409	84.498	VHITDK(1)QK	3	1.239	1	1.044	1.11	0.982	1.165	1.006	1.159	0.803	0.879	0.91	1.165	1.171	1.206	1.212	1.212	1.141	0.543	0.491	0.565	0.896137	0.947908	0.814262	0.961221	0.830033
CSA022081.1	78	K	histone acetyltransferase of the MYST family 1-like	3	3	1	0.0185299	52.705	FHPVK(1)VIER	3	1.2058	1	1	0.00868627	62.869	FHPVK(1)VIER	3	0.43408	1	1	0.0019098	79.16	FHPVK(1)VIER	3	-0.20753	1	1.473	1.32	1.284	0.614	0.787	0.78	0.646	0.751	0.773
CSA022081.1	144	K	histone acetyltransferase of the MYST family 1-like	3	3	1	4.40964e-07	74.444	K(1)IDETHVEGHEELDAASLR	4	-0.71371	1	1	8.14132e-25	137.86	K(1)IDETHVEGHEELDAASLR	3	-0.50816	2	1	3.00802e-29	148.75	K(1)IDETHVEGHEELDAASLR	3	0.77414	2	0.827	0.948	0.933	0.86	0.934	0.893	1.594	1.257	1.351
CSA022118.1	150	K	ATPase family AAA domain-containing protein 3-B-like	3	3	1	0.00130288	113.62	VIYEEQK(1)K	2	-2.3479	1	1	0.000493209	126.07	VIYEEQK(1)K	2	-2.7036	1	1	0.000126226	135.71	VIYEEQK(1)K	2	-2.3934	1	0.792	0.828	0.811	1.085	1.12	1.066	1.389	1.257	1.382	1.141	1.165	1.097	1.088	1.076	1.06	0.71	0.689	0.8	0.694128	0.71073	0.739289	0.997243	1.04089
CSA022118.1	391	K	ATPase family AAA domain-containing protein 3-B-like	3	3	1	1.22622e-07	125.84	ATANTK(1)SHQAPFR	3	2.08	1	1	2.33717e-05	95.854	ATANTK(1)SHQAPFR	3	1.271	1	1	0.000263465	73.877	ATANTK(1)SHQAPFR	3	1.847	1	1.172	1.088	1.114	0.993	1.119	0.962	0.764	0.789	0.889	1.141	1.165	1.097	1.088	1.076	1.06	0.71	0.689	0.8	1.02717	0.933906	1.0155	0.912684	1.03996
CSA022118.1	474	K	ATPase family AAA domain-containing protein 3-B-like	3	3	1	0.00837012	84.352	NK(1)TYMSEAQR	2	-0.89279	1	1	0.00318589	100.38	NK(1)TYMSEAQR	2	-0.34735	1	1	0.000880232	122.34	NK(1)TYMSEAQR	2	-0.14521	1	1.166	1.263	1.227	1.019	0.982	0.914	0.745	0.63	0.72	1.141	1.165	1.097	1.088	1.076	1.06	0.71	0.689	0.8	1.02191	1.08412	1.11851	0.936581	0.912639
CSA022248.1	47	K	importin subunit alpha-4 isoform X2	3	3	1	0.0314724	76.064	EDNLLK(1)K	2	2.3665	1	1	0.0339747	76.679	EDNLLK(1)K	2	0.97201	1	1	0.014009	87.476	EDNLLK(1)K	2	1.301	1	1.232	1.336	1.352	0.906	0.89	0.829	0.755	0.604	0.57
CSA022255.1	289	K	ankyrin repeat domain-containing protein 2B-like	3	3	1	2.2375e-08	109.51	NK(1)NTALHYAAGYGR	3	-1.6865	1	1	1.48406e-05	84.173	NK(1)NTALHYAAGYGR	3	0.58584	1	1	4.21174e-05	78.809	NK(1)NTALHYAAGYGR	3	0.71868	2	0.934	1.017	0.927	1.116	1.122	0.995	1.075	0.915	1.232	0.917	0.899	0.937	0.967	0.977	0.965	1.162	1.127	1.092	1.01854	1.13126	0.989328	1.15408	1.14841
CSA022278.1	202	K	T-complex protein 1 subunit zeta-like isoform X2	3	3	1	0.017868	85.622	HK(1)FDVDTR	2	0.51607	2	1	0.00647517	92.239	HK(1)FDVDTR	2	0.80441	2	1	0.00379641	93.325	HK(1)FDVDTR	2	-0.12467	2	1.199	1.267	1.205	0.918	0.887	0.862	0.805	0.732	0.83	1.345	1.314	1.323	0.868	0.85	0.862	0.665	0.697	0.702	0.89145	0.964231	0.910809	1.0576	1.04353
CSA022278.1	430	K	T-complex protein 1 subunit zeta-like isoform X2	3	3	1	8.17164e-07	134.25	QYLINEVK(1)K	2	1.4143	2	1	0.000707505	107.06	QYLINEVK(1)K	3	0.93864	2	1	0.000664227	118.28	QYLINEVK(1)K	2	1.7778	2	1.447	1.439	1.322	0.749	0.791	0.785	0.53	0.532	0.689	1.345	1.314	1.323	0.868	0.85	0.862	0.665	0.697	0.702	1.07584	1.09513	0.999244	0.862903	0.930588
CSA022360.1	41	K	methyl-CpG-binding domain-containing protein 11 isoform X1	3	3	1	2.20094e-16	128.1	K(1)NEIVFTSPTGEEITNRK	3	-0.07662	3	1	4.29981e-06	79.565	K(1)NEIVFTSPTGEEITNRK	3	-0.5254	2	1	6.4476e-15	110.74	K(1)NEIVFTSPTGEEITNR	3	1.3405	1	1.047	1.045	0.94	1.174	1.205	1.154	0.785	0.767	1.002	1.242	1.232	1.199	1.125	1.135	1.185	0.498	0.535	0.515	0.842995	0.848214	0.783987	1.04356	1.06167
CSA022360.1	106	K	methyl-CpG-binding domain-containing protein 11 isoform X1	3	3	1	6.9438e-07	112.44	TTPPLEIEPPK(1)K	3	0.9756	6	1	0.00746745	56.551	TTPPLEIEPPK(1)K	3	-0.088372	2	1	2.05099e-06	116.19	TTPPLEIEPPK(1)K	3	-1.8968	6	0.882	0.588	0.888	1.434	1.297	1.315	0.788	1.488	0.904	1.242	1.232	1.199	1.125	1.135	1.185	0.498	0.535	0.515	0.710145	0.477273	0.740617	1.27467	1.14273
CSA022369.1	179	K	cystathionine gamma synthase	3	3	1	0.0015248	105.03	K(1)TSELIDFK	2	0.26654	2	1	0.000463318	125.97	K(1)TSELIDFK	2	0.63015	2	1	0.000781318	105.03	K(1)TSELIDFK	2	-0.0011161	2	1.018	1.088	1.037	1.233	1.324	1.323	0.769	0.549	0.586	0.972	1.013	1.007	1.27	1.205	1.271	0.748	0.757	0.679	1.04733	1.07404	1.02979	0.970866	1.09876
CSA022369.1	187	K	cystathionine gamma synthase	3	3	1	0.000594301	120.57	TSELIDFK(1)EK	2	0.24017	2	1	0.00331675	98.105	TSELIDFK(1)EK	3	-0.23918	2	1	0.000888706	110.64	TSELIDFK(1)EK	2	0.74672	2	1.186	1.115	1.146	1	0.983	1.046	0.728	0.897	0.717	0.972	1.013	1.007	1.27	1.205	1.271	0.748	0.757	0.679	1.22016	1.10069	1.13803	0.787402	0.815768
CSA022404.1	19	K	phosphoenolpyruvate/phosphate translocator 1, chloroplastic	3	3	1	7.56683e-12	137.09	VSPVTHSVGNCVK(1)R	3	-0.20101	2	1	1.22635e-07	102.57	VSPVTHSVGNCVK(1)R	3	-0.66646	2	1	2.00028e-07	106.11	VSPVTHSVGNCVK(1)R	3	-0.43846	1	0.98	0.958	0.95	1.211	1.255	1.321	0.87	0.866	0.768	0.916		0.912	1.329		1.174	0.761		0.935	1.06987		1.04167	0.911211
CSA022412.1	258	K	phosphoglucomutase, cytoplasmic	3	3	1	0.00418753	104.45	NMILGK(1)R	2	0.55037	1	1	0.0194652	85.265	NMILGK(1)R	2	-0.23241	1	1	0.00473666	104.45	NMILGK(1)R	2	0.13674	2	0.911	1.052	0.934	1.305	1.153	1.178	0.891	0.813	0.985	0.859	0.863	0.827	1.058	1.068	1.07	1.122	1.14	1.148	1.06054	1.219	1.12938	1.23346	1.07959
CSA022565.1	19	K	S-formylglutathione hydrolase-like isoform X2	3	3	1	0.0018691	109.36	MYGGYNK(1)R	2	-0.49186	1	1	0.00441618	92.491	MYGGYNK(1)R	2	-0.26684	1	1	0.00483553	92.491	MYGGYNK(1)R	2	-0.41436	1	1.186	1.142	1.157	1.136	1.12	1.081	0.563	0.687	0.648	0.912	0.898	1.053	1.095	1.019	1.059	1.005	1.031	0.971	1.30044	1.27171	1.09877	1.03744	1.09912
CSA022649.1	53	K	probable glutathione S-transferase	3	3	1	0.0142695	44.511	SSLLLEMNPVHK(1)K	3	1.0198	1	1	4.02674e-05	90.861	SSLLLEMNPVHK(1)K	3	-1.499	1	1	5.63143e-05	87.831	SSLLLEMNPVHK(1)K	3	-2.5439	3	0.903	0.8	0.864	1.2	1.338	1.154	1.034	1.055	1.16	0.83	0.796	0.873	1.277	1.182	1.153	0.951	1.094	1.011	1.08795	1.00503	0.989691	0.939702	1.13198
CSA022671.1	184	K	guanine deaminase isoform X1	3	3	1	0.00218149	94.262	AHLEIK(1)R	3	-0.62825	1	1	0.000822878	106.42	AHLEIK(1)R	3	0.22172	1	1	0.00123877	107.43	AHLEIK(1)R	3	0.26796	1	1.224	1.292	1.134	0.887	0.863	1.008	0.792	0.714	0.79	1.204	1.081	1.143	1.116	1.102	1.139	0.579	0.777	0.715	1.01661	1.19519	0.992126	0.794803	0.783122
CSA022721.1	430	K	ATP sulfurylase 2	3	3	1	0.000185413	89.43	DPAGMDHPIEK(1)R	3	0.61081	2	1	0.000397829	81.565	DPAGMDHPIEK(1)R	3	-0.025507	2	1	0.00118351	73.881	DPAGMDHPIEK(1)R	3	-0.77125	2	0.905	0.77	0.903	1.042	1.068	0.984	1.222	1.424	1.297	0.721	0.69	0.72	1.032	1.056	1.027	1.357	1.342	1.331	1.2552	1.11594	1.25417	1.00969	1.01136
CSA022721.1	440	K	ATP sulfurylase 2	3	3	1	0.000304909	99.568	DLYDPDHGK(1)K	3	-0.023849	1	1	0.00955226	58.699	DLYDPDHGK(1)K	3	-0.26891	1	1	0.00194401	73.885	DLYDPDHGK(1)K	3	-0.70171	1	0.365	0.346	0.365	0.806	0.84	0.809	2.553	2.459	2.629	0.721	0.69	0.72	1.032	1.056	1.027	1.357	1.342	1.331	0.506241	0.501449	0.506944	0.781008	0.795455
CSA022721.1	467	K	ATP sulfurylase 2	3	3	1	0.00348612	84.507	VAAYDTVEK(1)R	2	0.050152	1	1	9.0048e-13	160.77	VAAYDTVEK(1)R	2	-0.82661	1	1	0.000506404	126.71	VAAYDTVEK(1)R	3	0.93043	2	0.904	0.781	0.734	1.189	1.267	1.296	1.044	1.172	1.245	0.721	0.69	0.72	1.032	1.056	1.027	1.357	1.342	1.331	1.25381	1.13188	1.01944	1.15213	1.19981
CSA022723.1	602	K	protein MEI2-like 5	3	3	1	0.0029377	110.31	SDIAGK(1)R	2	0.54357	1	1	0.0217491	83.753	SDIAGK(1)R	2	0.79854	1	1	0.0246349	80.229	SDIAGK(1)R	2	0.78881	1	1.136	1.154	1.134	0.901	0.998	0.877	0.946	0.809	0.957	1.192		1.138	0.981		0.885	0.755		0.934	0.95302		0.996485	0.918451
CSA022762.1	98	K	ribulose-1,5 bisphosphate carboxylase/oxygenase large subunit N-methyltransferase, chloroplastic[Jatropha curcas]	3	3	1	0.0075444	87.639	GLVALK(1)NIR	2	-0.73637	1	1	0.0220574	69.812	GLVALK(1)NIR	2	-0.038129	1	1	0.00274732	91.069	GLVALK(1)NIR	2	0.33577	2	0.784	0.874	0.791	1.182	1.106	1.095	1.286	1.191	1.382	0.81	0.785	0.865	1.131	1.149	1.155	1.086	1.136	1.075	0.967901	1.11338	0.914451	1.04509	0.962576
CSA022781.1	245	K	DNA gyrase subunit A, chloroplastic/mitochondrial	3	3	1	0.000257858	122.7	LQELLSSK(1)K	2	-0.23137	2	1	0.000813637	100.93	LQELLSSK(1)K	2	2.2405	4	1	0.000293565	127.87	LQELLSSK(1)K	2	1.9139	2	0.773	0.855	0.826	1.422	1.408	1.307	1.014	0.875	1.039	0.896	0.926	0.888	1.251	1.222	1.261	0.836	0.77	0.918	0.862723	0.923326	0.93018	1.13669	1.15221
CSA022823.1	26	K	GTP-binding nuclear protein Ran-3-like	3	3	1	7.772e-14	117.67	LVIVGDGGTGK(1)TTFVK	3	-2.2077	1	1	6.21769e-27	159.81	LVIVGDGGTGK(1)TTFVK	2	0.72177	2	1	1.17072e-28	195.38	LVIVGDGGTGK(1)TTFVK	3	-1.1954	2	1.227	1.397	1.412	0.944	0.865	0.804	0.718	0.522	0.478	1.282	1.343	1.295	0.883	0.883	0.869	0.741	0.675	0.745	0.957098	1.04021	1.09035	1.06908	0.979615
CSA022823.1	102	K	GTP-binding nuclear protein Ran-3-like	3	3	1	2.78023e-07	140.01	LTYK(1)NVPTWHR	2	-0.84922	2	1	0.0110041	55.776	LTYK(1)NVPTWHR	3	-0.58785	1	1	0.00176296	75.739	LTYK(1)NVPTWHR	2	0.1377	2	1.093	0.699	0.863	0.921	0.839	0.839	1.007	1.82	1.565	1.282	1.343	1.295	0.883	0.883	0.869	0.741	0.675	0.745	0.852574	0.520477	0.666409	1.04304	0.95017
CSA022823.1	137	K	GTP-binding nuclear protein Ran-3-like	3	1	1	0.00313	65.156	AK(1)QVTFHR	3	0.32834	1	1	0.00993098	68.224	AK(1)QVTFHR	3	0.98213	1	1	0.00688753	79.474	AK(1)QVTFHR	3	1.1083	1		1.038			1.042			0.967		1.282	1.343	1.295	0.883	0.883	0.869	0.741	0.675	0.745		0.772897			1.18007
CSA022823.1	145	K	GTP-binding nuclear protein Ran-3-like	3	3	1	7.80431e-17	162.31	K(1)NLQYYEISAK	3	-0.011866	5	1	3.16241e-21	182.1	K(1)NLQYYEISAK	2	-1.7366	5	1	4.35379e-06	148.62	K(1)NLQYYEISAK	2	-0.45428	6	1.27	1.326	1.235	0.869	0.85	0.858	0.726	0.669	0.773	1.282	1.343	1.295	0.883	0.883	0.869	0.741	0.675	0.745	0.99064	0.987342	0.953668	0.984145	0.962627
CSA022844.1	7	K	probable histone H2B.1	3	3	0.997387	0.000602795	111.63	AEK(0.997)K(0.003)PAEK(1)K	2	-0.17412	2	0.997387	0.00047719	111.63	AEK(0.997)K(0.003)PAEK(1)K	2	0.28723	3	0.996927	0.000839897	100.93	AEK(0.997)K(0.003)PAEK(1)K	2	0.014498	2	0.94	0.977	0.956	1.217	1.218	1.179	0.94	0.874	0.938		1.59	1.609		0.827	0.813		0.389	0.362		0.614465	0.594158		1.47279
CSA022844.1	12	K	probable histone H2B.1	3	3	1	0.000602795	111.63	AEK(0.85)K(0.15)PAEK(1)K	4	-0.21674	4	1	0.00047719	111.63	AEK(0.854)K(0.146)PAEK(1)K	4	-0.26537	3	1	0.000839897	100.93	AEK(0.85)K(0.15)PAEK(1)K	4	-0.016252	5	0.986	0.977	0.963	1.296	1.218	1.286	0.755	0.874	0.786		1.59	1.609		0.827	0.813		0.389	0.362		0.614465	0.598508		1.47279
CSA022874.1	412	K	histone-lysine N-methyltransferase, H3 lysine-9 specific SUVH1	3	3	1	0.00171434	115.71	AGCNVFK(1)YK	2	1.8347	1	1	0.000447049	128.36	AGCNVFK(1)YK	2	0.56963	1	1	0.00106564	115.71	AGCNVFK(1)YK	3	-0.66753	2	1.49	1.617	1.547	0.818	0.805	0.795	0.362	0.192	0.213	1.275	1.323	1.336	0.993	1.01	1.021	0.581	0.61	0.548	1.16863	1.22222	1.15793	0.823766	0.79703
CSA022879.1	53	K	dnaJ homolog subfamily C member 2	3	3	1	0.00228816	77.062	ETALK(1)HHPDK	4	0.076537	1	1	0.00863361	60.255	ETALK(1)HHPDK	4	0.60368	1	1	0.000856861	84.479	ETALK(1)HHPDK	4	0.21996	1	1.269	1.19	1.287	0.826	0.884	0.819	0.781	0.875	0.715	1.333	1.145	1.341	0.913	0.956	0.912	0.634	0.847	0.623	0.951988	1.0393	0.959732	0.90471	0.924686
CSA022952.1	46	K	glycerate dehydrogenase	3	3	1	5.0246e-08	147.2	VEICTQK(1)K	3	-1.8691	2	1	4.24785e-06	147.2	VEICTQK(1)K	2	-0.60477	1	1	0.000494377	123.35	VEICTQK(1)K	3	-1.0665	2	0.648	0.57	0.564	1.318	1.42	1.422	1.382	1.378	1.434	0.472	0.457	0.452	0.951	0.942	0.935	1.76	1.777	1.836	1.37288	1.24726	1.24779	1.38591	1.50743
CSA022952.1	250	K	glycerate dehydrogenase	3	3	1	3.26123e-08	145.29	ANGEQPVTWK(1)R	2	-1.9727	1	1	9.48364e-05	120.59	ANGEQPVTWK(1)R	2	-1.5916	1	1	9.26154e-10	166.6	ANGEQPVTWK(1)R	2	-1.0134	1	0.488	0.608	0.509	1.129	1.074	1.152	1.923	1.714	1.894	0.472	0.457	0.452	0.951	0.942	0.935	1.76	1.777	1.836	1.0339	1.33042	1.12611	1.18717	1.14013
CSA022953.1	72	K	SKP1-like protein 1A isoform X1	3	1	1	1.26633e-15	131.66	SDDK(1)TAEDELK	2	-2.1279	1	1	0.00146044	106.32	SDDK(1)TAEDELK	2	-2.0093	1	1	0.000557922	116.19	SDDK(1)TAEDELK	2	-1.4452	1			1.177			0.923			0.811	1.298	1.313	1.261	0.834	0.819	0.848	0.767	0.762	0.803			0.933386
CSA022980.1	52	K	probable glutathione S-transferase	3	3	1	0.00588577	97.798	MNPVHK(1)K	3	-0.32378	3	1	0.0139098	86.794	MNPVHK(1)K	2	-0.14448	4	1	0.00685472	98.997	MNPVHK(1)K	2	-0.2258	4	0.612	0.652	0.621	1.312	1.226	1.274	1.46	1.452	1.507	0.573	0.54	0.538	1.175	1.158	1.057	1.386	1.453	1.532	1.06806	1.20741	1.15428	1.1166	1.05872
CSA022980.1	92	K	probable glutathione S-transferase	3	3	1	0.000105944	109.96	SPPLLPSDPYK(1)R	2	1.4512	2	1	2.24184e-06	120.87	SPPLLPSDPYK(1)R	2	0.47041	2	1	1.58049e-05	122.39	SPPLLPSDPYK(1)R	2	-0.39618	3	0.664	0.664	0.668	1.096	1.142	1.075	1.619	1.53	1.665	0.573	0.54	0.538	1.175	1.158	1.057	1.386	1.453	1.532	1.15881	1.22963	1.24164	0.932766	0.986183
CSA022992.1	10	K	kirola-like	3	3	1	7.78377e-45	193.41	QVEIK(1)SDGDAFHEIFR	3	0.57507	1	1	6.42057e-23	154.52	QVEIK(1)SDGDAFHEIFR	3	-0.090331	1	1	8.08145e-23	177.56	QVEIK(1)SDGDAFHEIFR	3	0.50655	1	0.925	0.946	0.897	1.03	1.017	1.036	1.198	1.163	1.242	1.06	1.131	1.127	0.985	0.97	0.935	0.9	0.878	0.883	0.872642	0.836428	0.795918	1.04569	1.04845
CSA023151.1	241	K	fatty acid amide hydrolase-like	3	3	1	1.87974e-12	157.38	HCADDACCVK(1)R	2	-0.67139	4	1	3.04527e-15	171.92	HCADDACCVK(1)R	2	-0.66662	4	1	7.65466e-05	133.81	HCADDACCVK(1)R	3	-0.85331	2	0.211	0.191	0.136	2.481	2.534	2.552	0.81	0.77	0.871	0.515	0.524	0.525	2.07	1.92	1.883	0.475	0.591	0.636	0.409709	0.364504	0.259048	1.19855	1.31979
CSA023151.1	500	K	fatty acid amide hydrolase-like	3	3	1	0.00169516	100.19	QMQFHK(1)K	3	0.85965	1	1	0.00946341	76.134	QMQFHK(1)K	3	1.1692	1	1	0.0152983	67.032	QMQFHK(1)K	3	0.69931	1	0.451	0.339	0.349	1.869	2.24	2.176	1.092	0.844	0.914	0.515	0.524	0.525	2.07	1.92	1.883	0.475	0.591	0.636	0.875728	0.646947	0.664762	0.902899	1.16667
CSA023182.1	135	K	ribosome-binding factor PSRP1, chloroplastic	3	3	1	3.53033e-07	146.16	AIQK(1)HSHLVR	4	0.42061	4	1	3.55196e-05	128.51	AIQK(1)HSHLVR	4	0.31832	3	1	2.7463e-10	168.22	AIQK(1)HSHLVR	4	0.36734	4	0.846	0.923	0.785	1.428	1.169	1.654	0.866	1.03	0.682	0.877	0.775	0.793	1.224	1.417	1.432	0.882	0.833	0.788	0.964652	1.19097	0.989912	1.16667	0.824982
CSA023225.1	299	K	zinc finger CCCH domain-containing protein 40-like	3	3	1	0.00180689	115.29	TK(1)ICDNFIK	2	-2.2862	1	1	0.000310732	129.82	TK(1)ICDNFIK	2	-0.90293	1	1	1.53429e-06	152.7	TK(1)ICDNFIK	2	0.50481	1	1.275	1.513	1.47	0.855	0.87	0.862	0.734	0.306	0.284	1.172	1.094	1.085	1.039	1.038	1.046	0.73	0.807	0.788	1.08788	1.383	1.35484	0.822907	0.83815
CSA023240.1	53	K	glutathione S-transferase U17	3	3	1	0.00265381	111.82	LNPVYK(1)K	2	0.33249	2	1	0.00326218	111.82	LNPVYK(1)K	3	0.064423	3	1	0.00327338	111.82	LNPVYK(1)K	3	-0.77104	4	0.865	0.904	0.833	1.572	1.498	1.495	0.655	0.68	0.788	0.799	0.823	0.854	1.538	1.477	1.485	0.699	0.712	0.674	1.0826	1.09842	0.97541	1.02211	1.01422
CSA023240.1	124	K	glutathione S-transferase U17	3	3	1	0.00012792	129.85	AQGEEAK(1)K	2	1.6778	1	1	0.00144336	105.98	AQGEEAK(1)K	3	0.4309	2	1	0.000728219	117.7	AQGEEAK(1)K	2	-0.023249	1	0.753	0.79	0.724	1.452	1.428	1.475	1.017	0.97	1.039	0.799	0.823	0.854	1.538	1.477	1.485	0.699	0.712	0.674	0.942428	0.959903	0.847775	0.944083	0.966825
CSA023250.1	210	K	monothiol glutaredoxin-S15, mitochondrial	3	3	1	4.97984e-08	130.56	NILENPELK(1)NAVK	3	0.24583	1	1	1.67738e-05	101.38	NILENPELK(1)NAVK	3	1.8588	1	1	1.39002e-06	126.83	NILENPELK(1)NAVK	3	0.079032	1	0.884	1.055	0.98	1	1.062	1.179	1.314	0.913	0.888	1.122	1.21	1.169	1.005	0.964	0.975	0.827	0.735	0.775	0.787879	0.871901	0.838323	0.995025	1.10166
CSA023347.1	214	K	uncharacterized protein LOC100248601	3	3	1	0.0327482	87.476	FDK(1)TGGK	2	-0.52845	1	1	0.0111473	95.502	FDK(1)TGGK	2	0.31222	1	1	0.0198894	87.476	FDK(1)TGGK	2	-0.85974	2	1.126	1.099	1.095	0.934	1.011	0.992	0.925	0.893	0.891	1.144	1.16	1.179	1.007	0.983	0.977	0.781	0.78	0.772	0.984266	0.947414	0.928753	0.927507	1.02848
CSA023347.1	240	K	uncharacterized protein LOC100248601	3	3	1	0.00781235	89.698	GLTEK(1)FK	3	2.2787	2	1	0.00211076	101.54	GLTEK(1)FK	2	0.055232	2	1	0.0211453	64.757	GLTEK(1)FK	3	2.3605	1	1.269	1.22	1.089	1.075	1.031	1.01	0.475	0.652	0.88	1.144	1.16	1.179	1.007	0.983	0.977	0.781	0.78	0.772	1.10927	1.05172	0.923664	1.06753	1.04883
CSA023396.1	12	K	MLP-like protein 423 isoform X2	3	3	1	8.39056e-06	102.52	VTHEK(1)IEAVDEAK	3	-0.55702	2	1	2.30357e-05	96.135	VTHEK(1)IEAVDEAK	3	0.56412	1	1	3.90458e-06	104.7	VTHEK(1)IEAVDEAK	3	0.53161	2	1.007	0.964	0.96	1.396	1.187	1.255	0.594	0.934	0.832	1.059	1.089	1.064	1.391	1.414	1.353	0.521	0.536	0.484	0.950897	0.885216	0.902256	1.00359	0.839463
CSA023396.1	79	K	MLP-like protein 423 isoform X2	3	3	1	0.000591644	125.97	DFAVK(1)SFK	3	1.6318	2	1	0.00140315	114.4	DFAVK(1)SFK	3	-1.8743	3	1	0.00156987	112.71	DFAVK(1)SFK	3	0.66356	3	1.121	1.09	1.039	1.495	1.435	1.381	0.25	0.416	0.508	1.059	1.089	1.064	1.391	1.414	1.353	0.521	0.536	0.484	1.05855	1.00092	0.976504	1.07477	1.01485
CSA023397.1	19	K	MLP-like protein 423	3	3	0.999554	0.00202982	73.881	SKPEK(1)FWHGIR	3	-1.2027	2	0.998041	0.000566898	86.911	SK(0.002)PEK(0.998)FWHGIR	4	-1.1656	2	0.985367	0.0019665	75.819	SK(0.015)PEK(0.985)FWHGIR	4	-0.97444	2	1.002	1.023	0.966	1.312	1.409	1.48	0.704	0.57	0.533	1.074	1.06	1.061	1.481	1.418	1.41	0.317	0.444	0.371	0.932961	0.965094	0.910462	0.885888	0.993653
CSA023397.1	40	K	MLP-like protein 423	3	3	1	3.57679e-06	138.06	AMPEEYK(1)R	2	0.93674	6	1	0.0142543	78.516	AMPEEYK(1)R	2	-0.072052	5	1	0.000665684	119.21	AMPEEYK(1)R	2	0.37412	6	0.83	0.864	0.79	1.543	1.358	1.452	0.754	0.916	0.93	1.074	1.06	1.061	1.481	1.418	1.41	0.317	0.444	0.371	0.772812	0.815094	0.744581	1.04186	0.957687
CSA023424.1	433	K	inosine-5'-monophosphate dehydrogenase 2-like isoform X1	3	3	1	0.00210109	113.93	YLGDTAK(1)LK	2	-2.58	2	1	0.00107905	121.6	YLGDTAK(1)LK	2	-0.59188	2	1	0.00107295	113.93	YLGDTAK(1)LK	2	0.24161	3	1.049	1.281	1.187	0.874	0.936	0.898	1.148	0.65	0.82	1.169	1.208	1.196	0.91	0.905	0.891	0.864	0.835	0.844	0.897348	1.06043	0.992475	0.96044	1.03425
CSA023469.1	45	K	isoflavone reductase-like protein	3	2	1	1.42194e-05	86.772	ESTLSDPVK(1)GK	2	-0.76525	1	1	4.51936e-07	144.57	ESTLSDPVK(1)GK	3	-0.74874	2	1	5.03007e-05	130.56	ESTLSDPVK(1)GK	2	-1.6282	2		1.181	1.096		0.734	0.743		1.068	1.206	1.037	1.085	1.054	0.841	0.86	0.859	1.095	1.125	1.078		1.08848	1.03985		0.853488
CSA023469.1	127	K	isoflavone reductase-like protein	3	3	1	5.12457e-07	97.69	LHVVEPAK(1)STFAVK	3	-3.9836	1	1	3.7065e-07	95.981	LHVVEPAK(1)STFAVK	3	0.071354	2	1	2.96133e-06	92.039	LHVVEPAK(1)STFAVK	3	-1.5169	2	0.933	0.984	0.896	0.717	0.673	0.799	1.561	1.497	1.547	1.037	1.085	1.054	0.841	0.86	0.859	1.095	1.125	1.078	0.899711	0.906912	0.850095	0.852556	0.782558
CSA023509.1	274	K	AAA-type ATPase family protein	3	2	1	0.00150207	64.82	FDILK(1)IHSR	3	0.60325	1	1	0.00227814	75.652	FDILK(1)IHSR	3	0.39586	2	1	0.000505854	96.171	FDILK(1)IHSR	3	0.22035	2		1.015	1.011		0.981	0.952		1.08	1.116
CSA023534.1	543	K	phenylalanine ammonia-lyase	3	3	1	0.0013649	96.957	STVSQVAK(1)R	2	-0.80625	1	1	0.00257983	103.31	STVSQVAK(1)R	2	-0.4579	1	1	2.60904e-05	143.4	STVSQVAK(1)R	2	0.20694	1	1.55	1.641	1.675	0.584	0.542	0.459	0.533	0.455	0.377	1.583	1.583	1.693	0.618	0.589	0.581	0.597	0.61	0.512	0.979154	1.03664	0.989368	0.944984	0.920204
CSA023536.1	123	K	chalcone--flavonone isomerase-like isoform X2	3	3	1	0.00124621	85.676	HGVSPAAK(1)K	3	1.6967	2	1	0.00165381	76.679	HGVSPAAK(1)K	2	-0.2543	2	1	0.000229506	109.71	HGVSPAAK(1)K	2	2.548	3	1.338	1.369	1.328	0.769	0.764	0.759	0.718	0.691	0.71	1.323	1.32	1.3	0.838	0.762	0.757	0.728	0.814	0.848	1.01134	1.03712	1.02154	0.917661	1.00262
CSA023546.1	166	K	ATP synthase subunit O, mitochondrial-like	3	3	1	0.000856819	102.51	HLEAIAK(1)R	2	-0.36334	3	1	0.000178615	120.46	HLEAIAK(1)R	3	0.54078	2	1	0.000357326	111.74	HLEAIAK(1)R	3	-0.35534	5	1.023	0.865	0.938	0.998	1.073	0.99	1.047	1.247	1.217	0.955	0.986	0.977	0.995	0.984	1.015	1.058	1.04	1.019	1.0712	0.877282	0.960082	1.00302	1.09045
CSA023546.1	290	K	ATP synthase subunit O, mitochondrial-like	3	3	1	0.00299565	63.966	ETLQDIIGQGK(1)K	3	-1.2419	1	1	0.00137056	69.578	ETLQDIIGQGK(1)K	3	0.54593	1	1	0.000267613	86.772	ETLQDIIGQGK(1)K	3	-0.4848	1	0.923	0.937	0.991	1.048	1.053	0.988	1.178	1.141	1.11	0.955	0.986	0.977	0.995	0.984	1.015	1.058	1.04	1.019	0.966492	0.950304	1.01433	1.05327	1.07012
CSA023549.1	248	K	PHD finger protein Alfin1-like	3	3	1	0.00687696	87.639	CPSCSTK(1)R	2	0.016244	1	1	0.00373365	95.502	CPSCSTK(1)R	2	-0.257	1	1	0.000768246	116.73	CPSCSTK(1)R	2	-1.3281	1	0.879	0.93	0.839	1.498	1.514	1.497	0.716	0.614	0.773	1.107	1.105	1.109	1.179	1.169	1.165	0.659	0.673	0.671	0.794038	0.841629	0.756537	1.27057	1.29512
CSA023554.1	276	K	MALE GAMETOPHYTE DEFECTIVE 1	3	3	1	0.000761771	117.7	AQLEELK(1)K	2	0.53009	1	1	0.000496242	125.97	AQLEELK(1)K	3	0.31457	2	1	0.000728219	117.7	AQLEELK(1)K	3	2.1276	3	1.069	1.102	1.126	1.022	1.027	1.022	0.928	0.868	0.789	1.006	1.002	1.026	0.967	0.989	0.971	1.015	0.999	0.992	1.06262	1.0998	1.09747	1.05688	1.03842
CSA023554.1	287	K	MALE GAMETOPHYTE DEFECTIVE 1	3	3	1	0.000160137	105.46	EAVEAMETQK(1)K	3	-0.75639	1	1	0.000378787	94.767	EAVEAMETQK(1)K	3	0.050942	1	1	0.0235644	51.286	EAVEAMETQK(1)K	3	-3.0857	1	0.974	1.011	0.915	1.065	0.991	0.898	1.061	1.077	1.382	1.006	1.002	1.026	0.967	0.989	0.971	1.015	0.999	0.992	0.968191	1.00898	0.891813	1.10134	1.00202
CSA023573.1	110	K	translationally-controlled tumor protein homolog	3	3	1	0.000105088	110.38	LEGEKQEEFK(1)K	3	0.29602	1	1	0.000453879	110.92	LEGEKQEEFK(1)K	3	0.2551	1	1	0.000309635	116.51	LEGEKQEEFK(1)K	3	-1.958	2	1.308	1.356	1.25	0.857	0.863	0.881	0.669	0.598	0.712	1.227	1.369	1.431	0.95	0.88	0.866	0.74	0.633	0.524	1.06601	0.990504	0.873515	0.902105	0.980682
CSA023573.1	111	K	translationally-controlled tumor protein homolog	3	3	1	0.0059669	89.171	K(1)NIEGATK	2	-0.86041	1	1	0.000503077	125.75	K(1)NIEGATK	2	-0.73844	1	1	0.00271028	99.568	K(1)NIEGATK	2	-0.82061	1	1.33	1.341	1.243	0.877	0.84	0.87	0.601	0.653	0.742	1.227	1.369	1.431	0.95	0.88	0.866	0.74	0.633	0.524	1.08394	0.979547	0.868623	0.923158	0.954545
CSA023676.1	390	K	DNA gyrase subunit B, chloroplastic/mitochondrial	3	3	1	0.000316271	123.86	TLNNLGK(1)K	2	1.1117	1	1	0.00315721	98.044	TLNNLGK(1)K	2	1.0498	1	1	0.00150074	108.43	TLNNLGK(1)K	2	1.0954	1	1.026	1.081	1.022	1.176	1.216	1.205	0.823	0.688	0.77	0.922	0.897	0.88	1.137	1.119	1.252	0.89	0.924	0.91	1.1128	1.20513	1.16136	1.0343	1.08668
CSA023774.1	124	K	aldo-keto reductase family 4 member C9	3	3	1	6.39008e-05	119.25	AMEALYDSGK(1)AR	2	0.5194	1	1	0.000132862	106.32	AMEALYDSGK(1)AR	2	-0.6402	1	1	0.000943659	90.759	AMEALYDSGK(1)AR	2	0.54678	1	1.191	1.158	1.033	0.959	0.962	0.947	0.768	0.844	1.076	1.342	1.284	1.336	0.888	0.932	0.939	0.632	0.664	0.609	0.887481	0.901869	0.773204	1.07995	1.03219
CSA023780.1	133	K	putidaredoxin-like	3	3	1	0.00171587	102.51	VLNK(1)HSR	3	0.59954	1	1	0.00356092	90.37	VLNK(1)HSR	3	1.2521	2	1	0.00132899	110.14	VLNK(1)HSR	3	0.18995	3	1.231	1.075	1.032	0.941	0.999	1.064	0.714	0.951	0.927		1.019			0.969			1.008			1.05496			1.03096
CSA023820.1	549	K	acetate/butyrate--CoA ligase AAE7, peroxisomal	3	3	1	0.000767662	114.78	VQK(1)HLLR	3	0.54383	1	1	0.0141528	71.342	VQK(1)HLLR	3	0.7853	1	1	0.00421201	91.626	VQK(1)HLLR	3	0.60338	1	1.171	1.017	0.967	1.031	1.074	1.12	0.72	0.97	0.992	1.061	1.241	1.068	0.952	0.924	0.932	0.966	0.791	0.978	1.10368	0.8195	0.905431	1.08298	1.16234
CSA023878.1	380	K	uncharacterized protein LOC100257683	3	3	1	0.000284156	101.35	DRPAASDK(1)ER	3	-0.016732	1	1	0.00257593	78.324	DRPAASDK(1)ER	3	1.0529	1	1	0.0117283	67.08	DRPAASDK(1)ER	3	0.511	1	1.17	1.177	1.135	1.247	1.241	1.374	0.46	0.485	0.319
CSA023907.1	78	K	vesicle transport v-SNARE 13-like	3	3	1	5.99591e-23	186.46	EYK(1)SDLNNLK	2	0.7769	2	1	1.42118e-25	196.16	EYK(1)SDLNNLK	3	0.77209	2	1	5.37077e-06	151.13	EYK(1)SDLNNLK	2	0.075271	2	0.966	0.963	0.988	0.934	0.934	1.028	1.236	1.23	1.066	1.083	1.059	1.047	1.038	1.007	0.994	0.844	0.869	0.941	0.891967	0.909348	0.943649	0.899807	0.927507
CSA023939.1	85	K	peroxisomal 2,4-dienoyl-CoA reductase	3	2	1	0.0231701	47.971	VVESTVK(1)HFGR	3	1.8662	1	1	0.000398901	97.734	VVESTVK(1)HFGR	3	1.1971	1	1	0.00159238	77.288	VVESTVK(1)HFGR	3	2.1974	1		1.113	1.049		1.026	1.014		0.851	0.957	1.014	1.022	1.034	1.003	1.036	1.01	0.969	0.898	0.896		1.08904	1.01451		0.990347
CSA024064.1	184	K	chlorophyll a-b binding protein 6A, chloroplastic	3	3	1	0.00102428	118.9	DPVK(1)FEENK	2	0.21538	1	1	0.00233825	113.22	DPVK(1)FEENK	2	-0.43954	1	1	0.00110858	105.2	DPVK(1)FEENK	2	0.10811	1	0.311	0.321	0.302	0.526	0.582	0.558	3.001	2.805	3.079	0.534	0.482	0.488	0.755	0.639	0.618	1.864	1.934	2.137	0.582397	0.665975	0.618852	0.696689	0.910798
CSA024149.1	13	K	mitochondrial outer membrane protein porin of 34 kDa	3	3	1	2.52862e-05	128.85	GPGLYTEIGK(1)K	2	-0.17796	2	1	8.72261e-16	138.63	GPGLYTEIGK(1)K	3	0.19861	5	1	0.000151228	138.63	GPGLYTEIGK(1)K	3	0.42119	4	0.767	0.782	0.759	1.014	1.014	1.018	1.525	1.465	1.549	1.064	1.005	1.044	1.032	1.024	0.996	0.877	0.991	0.943	0.720865	0.778109	0.727011	0.982558	0.990234
CSA024188.1	29	K	uncharacterized protein LOC8274802	3	3	1	0.0086661	93.096	TK(1)ATIINK	2	0.96213	1	1	0.00254252	104.22	TK(1)ATIINK	2	-0.046	1	1	0.00660768	93.096	TK(1)ATIINK	2	-1.6271	1	1.183	1.259	1.256	0.949	0.969	0.913	0.796	0.652	0.661
CSA024261.1	164	K	pectinesterase	3	1	1	0.00880887	58.04	K(1)SLSQHADDLK	3	0.41218	1	1	0.0025095	69.345	K(1)SLSQHADDLK	3	-0.99889	1	1	0.00168442	63.181	K(1)SLSQHADDLK	3	-1.095	1	1.062			1.026			0.938			1.267	1.199	1.282	1.062	1.037	1.011	0.511	0.579	0.559	0.8382			0.966102
CSA024261.1	317	K	pectinesterase	3	3	1	1.24863e-05	131.35	K(1)TNIMFLGDDR	2	-1.9058	2	1	0.00166089	90.476	K(1)TNIMFLGDDR	2	-1.2089	2	1	0.000105245	102.52	K(1)TNIMFLGDDR	2	-1.0527	2	1.056	0.993	1.371	1.055	1.255	1.044	0.914	0.801	0.256	1.267	1.199	1.282	1.062	1.037	1.011	0.511	0.579	0.559	0.833465	0.82819	1.06942	0.993409	1.21022
CSA024261.1	328	K	pectinesterase	3	3	1	0.00242602	89.805	K(1)TTIITGSR	2	0.15395	2	1	0.00279189	90.913	K(1)TTIITGSR	2	0.10365	2	1	0.000952783	99.985	K(1)TTIITGSR	2	-0.19192	2	1.197	1.257	1.202	1.099	1.09	1.067	0.588	0.515	0.574	1.267	1.199	1.282	1.062	1.037	1.011	0.511	0.579	0.559	0.944751	1.04837	0.937598	1.03484	1.05111
CSA024339.1	126	K	elongation factor Tu, mitochondrial	3	3	1	1.61895e-22	149.59	GITIATAHVEYETAK(1)R	3	0.43678	2	1	9.06569e-28	162.64	GITIATAHVEYETAK(1)R	3	1.3286	1	1	2.33572e-14	135.72	GITIATAHVEYETAK(1)R	3	0.75444	2	0.888	0.968	0.902	0.92	0.96	0.962	1.403	1.191	1.328	1.038	1.03	1.053	1.036	1.037	1.03	0.912	0.878	0.885	0.855491	0.939806	0.8566	0.888031	0.925747
CSA024339.1	319	K	elongation factor Tu, mitochondrial	3	3	1	0.00018247	108.72	TTVTGVEMFK(1)K	2	2.1377	2	1	0.0002924	104.82	TTVTGVEMFK(1)K	3	-0.79126	1	1	2.18307e-05	144.57	TTVTGVEMFK(1)K	2	-0.26083	2	0.922	1.088	1.074	1.056	0.988	1.145	1.172	0.942	0.739	1.038	1.03	1.053	1.036	1.037	1.03	0.912	0.878	0.885	0.888247	1.05631	1.01994	1.01931	0.952748
CSA024442.1	24	K	signal recognition particle 9 kDa protein	3	2	1	2.06941e-10	158.04	FK(1)TDQAQEAK	2	-1.3915	1	1	0.00259689	107.17	FK(1)TDQAQEAK	2	0.85877	1	1	3.5507e-12	131.69	FK(1)TDQAQEAK	2	1.1729	1	1.358	1.229		0.855	0.967		0.573	0.71		1.236	1.174	1.192	0.941	0.896	0.953	0.752	0.916	0.785	1.09871	1.04685		0.908608	1.07924
CSA024452.1	114	K	proteasome assembly chaperone 2	3	3	1	9.81522e-09	145.1	NVADFAADSGK(1)K	2	-0.52272	2	1	0.000186112	88.101	NVADFAADSGK(1)K	3	2.0185	1	1	1.2292e-10	166.03	NVADFAADSGK(1)K	2	-0.13127	1	0.855	0.873	0.816	1.035	1.094	1.079	1.329	1.209	1.353	1.136	1.171	1.18	1	0.983	0.97	0.811	0.782	0.784	0.752641	0.745517	0.691525	1.035	1.11292
CSA024497.1	288	K	aconitate hydratase, cytoplasmic	3	3	1	5.87231e-06	134.57	AVISK(1)SFER	2	0.62717	1	1	1.05014e-08	157.78	AVISK(1)SFER	2	0.52945	1	1	0.00019322	134.57	AVISK(1)SFER	2	0.3788	1	1.199	1.11	1.032	1.029	1.088	1.09	0.668	0.784	0.895	1.179	1.185	1.207	0.998	1.07	0.988	0.79	0.713	0.729	1.01696	0.936709	0.855012	1.03106	1.01682
CSA024499.1	433	K	putative aconitate hydratase, cytoplasmic	3	2	1	0.00784416	72.928	EQHDK(1)VAK	3	0.029867	1	1	0.0073529	72.928	EQHDK(1)VAK	3	-0.98261	1	1	0.00842836	70.028	EQHDK(1)VAK	3	-0.97384	1		1.141	1.127		0.871	0.953		0.981	0.874	1.162	1.14	1.1	1.039	1.037	1.026	0.71	0.734	0.725		1.00088	1.02455		0.839923
CSA024502.1	27	K	uncharacterized protein LOC109797113	3	3	1	0.000299055	127.17	ISSLDELK(1)TK	2	0.94472	1	1	0.00952835	75.739	ISSLDELK(1)TK	2	1.3788	1	1	0.00068367	105.65	ISSLDELK(1)TK	2	0.13868	1	0.662	0.873	0.783	0.987	1.126	1.008	1.758	1.171	1.513
CSA024512.1	32	K	40S ribosomal protein S17-4-like	3	3	1	0.000324555	101.38	MTLDFHTNK(1)K	3	-0.42887	3	1	0.000377027	110.38	MTLDFHTNK(1)K	3	-1.49	3	1	0.000116883	102.52	MTLDFHTNK(1)K	3	-1.9299	2	1.584	1.502	1.514	0.616	0.671	0.652	0.427	0.56	0.461	1.673	1.728	1.546	0.647	0.572	0.653	0.458	0.426	0.525	0.946802	0.869213	0.979301	0.952087	1.17308
CSA024512.1	44	K	40S ribosomal protein S17-4-like	3	3	1	2.69984e-05	119.25	ILEEVAIIPSK(1)R	2	-0.36393	2	1	1.64304e-08	132.79	ILEEVAIIPSK(1)R	2	-1.4342	2	1	1.50513e-10	164.11	ILEEVAIIPSK(1)R	2	0.71082	2	1.679	1.857	1.772	0.587	0.382	0.42	0.279	0.249	0.227	1.673	1.728	1.546	0.647	0.572	0.653	0.458	0.426	0.525	1.00359	1.07465	1.14618	0.907264	0.667832
CSA024512.1	59	K	40S ribosomal protein S17-4-like	3	3	1	0.00239908	73.499	IAGFSTHLMK(1)R	3	0.10965	2	1	0.000746051	80.037	IAGFSTHLMK(1)R	3	0.59481	2	1	0.000127771	97.813	IAGFSTHLMK(1)R	3	0.18776	2	1.264	1.216	1.222	0.852	0.912	0.833	0.761	0.798	0.833	1.673	1.728	1.546	0.647	0.572	0.653	0.458	0.426	0.525	0.755529	0.703704	0.790427	1.31685	1.59441
CSA024647.1	288	K	protein SIEVE ELEMENT OCCLUSION B-like	3	3	1	3.76181e-07	138.25	INNIHEHLK(1)K	3	-2.9425	2	1	0.000554176	101.39	INNIHEHLK(1)K	3	-0.79127	2	1	0.000186775	119.53	INNIHEHLK(1)K	4	-0.66348	1	0.698	0.823	0.654	1.244	1.182	1.199	1.376	1.196	1.535	0.755	0.75	0.758	1.097	1.061	1.084	1.243	1.28	1.295	0.924503	1.09733	0.862797	1.134	1.11404
CSA024647.1	662	K	protein SIEVE ELEMENT OCCLUSION B-like	3	3	1	0.0141528	97.431	GFEK(1)SFK	2	0.30285	1	1	0.00984123	97.431	GFEK(1)SFK	2	0.44709	1	1	0.0111128	97.431	GFEK(1)SFK	2	-0.043161	1	0.8	0.798	0.749	1.19	1.225	1.273	1.243	1.191	1.244	0.755	0.75	0.758	1.097	1.061	1.084	1.243	1.28	1.295	1.0596	1.064	0.988127	1.08478	1.15457
CSA024653.1	18	K	coatomer subunit zeta-1-like	3	3	1	1.30526e-09	147.24	NILLLDSEGK(1)R	3	-0.32423	2	1	2.78998e-06	132.79	NILLLDSEGK(1)R	3	-1.2115	2	1	0.000188091	136.93	NILLLDSEGK(1)R	3	0.41168	2	1.155	1.09	1.067	1.095	1.091	1.079	0.673	0.817	0.835	0.976	1.158	1.079	0.932	0.98	0.968	1.107	0.803	0.872	1.1834	0.941278	0.988879	1.17489	1.11327
CSA024718.1	62	K	chalcone synthase 1	3	3	1	0.00785437	96.342	MCDK(1)SMIK	2	-0.36475	1	1	0.0154185	83.499	MCDK(1)SMIK	2	-0.5139	1	1	0.0193767	77.662	MCDK(1)SMIK	2	-0.90536	1	1.827	1.887	1.769	0.336	0.314	0.364	0.297	0.274	0.305	1.755	1.472	1.803	0.477	0.638	0.395	0.557	0.806	0.504	1.04103	1.28193	0.981143	0.704403	0.492163
CSA024756.1	465	K	vacuolar fusion protein CCZ1 homolog isoform X2	3	2	1	0.00272121	105.52	AK(1)NNAWVIAR	2	-0.62498	1	1	0.000416391	121.93	AK(1)NNAWVIAR	2	1.3204	1	1	0.00011904	83.883	AK(1)NNAWVIAR	2	-2.6016	1	0.959	0.927		1.081	1.106		1.069	1.095		0.938	0.902	0.975	0.993	1.026	1.014	1.083	1.09	1.019	1.02239	1.02772		1.08862	1.07797
CSA024758.1	31	K	nuclear pore complex protein NUP88	3	1	1	0.0183742	55.676	HHGPQLK(1)K	4	2.0102	1	1	0.0106866	60.682	HHGPQLK(1)K	4	2.0479	1	1	0.0164174	55.676	HHGPQLK(1)K	4	1.1856	1			0.995			1			1.086	1.226	1.229		0.858	0.902		0.84	0.757
CSA024785.1	165	K	uncharacterized protein LOC109005947	3	3	1	1.23642e-15	151.8	FEGFAGTNDPLGK(1)K	2	-0.0046882	2	1	1.90469e-23	173.03	FEGFAGTNDPLGK(1)K	2	1.6195	2	1	2.32047e-09	142.45	FEGFAGTNDPLGK(1)K	2	0.5188	2	0.629	0.649	0.733	1.708	1.554	1.536	0.943	1.08	0.941	0.924	0.926	0.957	1.228	1.232	1.172	0.816	0.906	0.786	0.680736	0.700864	0.765935	1.39088	1.26136
CSA024857.1	54	K	inositol-3-phosphate synthase	3	3	1	0.000104474	113.22	YEFK(1)TDTHVPK	3	1.0884	1	1	0.000320058	105.65	YEFK(1)TDTHVPK	3	1.0913	1	1	0.00111464	81.625	YEFK(1)TDTHVPK	3	0.57619	1	0.863	0.881	0.841	1.05	1.098	1.099	1.293	1.188	1.278	0.769	0.793	0.781	0.905	0.907	0.906	1.421	1.367	1.396	1.12224	1.11097	1.07682	1.16022	1.21058
CSA024879.1	348	K	arogenate dehydratase 3, chloroplastic	3	3	1	0.00747558	85.522	NISLTK(1)IESR	2	1.005	1	1	0.00175803	111.96	NISLTK(1)IESR	2	0.064625	1	1	0.00233067	89.43	NISLTK(1)IESR	2	-1.5732	1	1.056	1.267	1.207	0.841	0.84	0.812	1.174	0.786	0.892	1.33	1.266	1.195	0.827	0.898	0.878	0.746	0.742	0.817	0.793985	1.00079	1.01004	1.01693	0.935412
CSA024905.1	53	K	probable carboxylesterase 5	3	3	1	4.04361e-58	217.91	DTLISPETGVK(1)AR	3	1.1062	2	1	2.06236e-32	194.86	DTLISPETGVK(1)AR	3	0.063439	2	1	6.41124e-54	237.41	DTLISPETGVK(1)AR	2	0.81367	2	0.818	0.854	0.813	1.108	1.059	1.153	1.31	1.283	1.266	0.845	0.853	0.874	1.087	1.104	1.127	1.091	1.078	1.051	0.968047	1.00117	0.930206	1.01932	0.959239
CSA024921.1	16	K	uncharacterized protein LOC100261274	3	3	1	1.8695e-58	216.88	ALDYESLNENVK(1)K	2	0.96057	2	1	6.64736e-18	163.51	ALDYESLNENVK(1)K	2	-0.47234	2	1	6.13562e-32	213.67	ALDYESLNENVK(1)K	2	0.093521	2	0.405	0.472	0.419	1.206	1.177	1.178	1.988	1.84	2.046	0.507	0.543	0.558	0.934	0.902	0.912	1.783	1.715	1.668	0.798817	0.869245	0.750896	1.29122	1.30488
CSA024921.1	406	K	uncharacterized protein LOC100261274	3	3	1	0.0298159	76.774	AIEAAK(1)R	2	-0.3027	1	1	0.0217491	83.753	AIEAAK(1)R	2	-0.723	1	1	0.0140347	87.435	AIEAAK(1)R	2	-0.18893	1	0.467	0.404	0.34	0.999	0.976	1.017	2.12	2.196	2.414	0.507	0.543	0.558	0.934	0.902	0.912	1.783	1.715	1.668	0.921105	0.744015	0.609319	1.06959	1.08204
CSA024930.1	182	K	mediator of RNA polymerase II transcription subunit 12 isoform X2	3	3	1	0.00014801	107.55	WIEGLSQPHK(1)R	3	-0.70322	1	1	0.00230796	70.412	WIEGLSQPHK(1)R	3	-1.737	1	1	0.000121335	98.04	WIEGLSQPHK(1)R	3	-2.3472	1	1.245	1.211	1.133	1.067	0.965	0.911	0.533	0.744	0.916
CSA024935.1	129	K	pyruvate kinase, cytosolic isozyme	3	2	1	7.47085e-05	93.623	GDAEMISMSYK(1)K	3	2.0446	1	1	0.000147246	89.301	GDAEMISMSYK(1)K	3	0.91824	1	1	8.34944e-06	139.48	GDAEMISMSYK(1)K	3	0.95842	6	1.025		1.151	1.056		0.881	0.973		0.917	1.196	1.22	1.205	0.908	0.905	0.915	0.79	0.788	0.784	0.857023		0.955187	1.163
CSA024935.1	233	K	pyruvate kinase, cytosolic isozyme	3	3	1	0.00130871	68.044	VLGIHAK(1)HIQLMSK	3	0.12339	2	1	2.55943e-05	79.614	VLGIHAK(1)HIQLMSK	3	0.25583	2	1	1.18548e-05	84.297	VLGIHAK(1)HIQLMSK	3	0.15756	2	0.781	0.781	0.722	0.825	0.858	0.909	1.727	1.648	1.765	1.196	1.22	1.205	0.908	0.905	0.915	0.79	0.788	0.784	0.65301	0.640164	0.59917	0.90859	0.948066
CSA025044.1	321	K	threonine--tRNA ligase, chloroplastic/mitochondrial 2	3	3	1	0.000493074	105.52	HIIEGFWK(1)K	3	-0.061677	1	1	0.000867525	85.676	HIIEGFWK(1)K	3	-0.65816	1	1	0.0350319	40.724	HIIEGFWK(1)K	3	-0.60709	1	0.558	0.637	0.657	1.382	1.306	1.322	1.479	1.39	1.37	0.707	0.733	0.748	1.32	1.249	1.258	1.06	1.082	1.055	0.78925	0.869031	0.878342	1.04697	1.04564
CSA025110.1	85	K	ferredoxin--NADP reductase, leaf isozyme, chloroplastic	3	2	1	0.000999723	84.31	FRPK(1)DPYVGR	3	0.53978	2	1	0.0118484	65.056	FRPK(1)DPYVGR	3	1.0528	1	1	0.0035743	79.489	FRPK(1)DPYVGR	3	-0.38449	2	0.821		0.744	1.051		1.099	1.373		1.478	0.348	0.381	0.414	1.107	1.099	1.092	1.679	1.747	1.574	2.3592		1.7971	0.949413
CSA025110.1	166	K	ferredoxin--NADP reductase, leaf isozyme, chloroplastic	3	3	1	0.000560937	119.21	TVSLCVK(1)R	2	1.0575	1	1	0.00249063	100.98	TVSLCVK(1)R	2	1.3341	1	1	0.0132985	78.113	TVSLCVK(1)R	2	-0.038883	1	0.637	0.534	0.761	1.067	1.163	1.061	1.708	1.742	1.49	0.348	0.381	0.414	1.107	1.099	1.092	1.679	1.747	1.574	1.83046	1.40157	1.83816	0.963866	1.05823
CSA025126.1	284	K	uncharacterized protein LOC105633544	3	3	1	0.000252772	110.84	INSIHDHLK(1)K	4	0.9011	3	1	6.00614e-05	120.77	INSIHDHLK(1)K	4	0.37894	3	1	0.000154548	124.12	INSIHDHLK(1)K	4	-0.41115	3	0.778	0.805	0.754	1.34	1.273	1.408	1.103	1.122	1.063	0.621	0.712	0.88	1.225	1.216	1.215	1.283	1.281	1.001	1.25282	1.13062	0.856818	1.09388	1.04688
CSA025126.1	340	K	uncharacterized protein LOC105633544	3	3	1	0.000395344	83.692	DDLLPLFDGSAK(1)R	2	-0.18288	1	1	2.14759e-12	150.26	DDLLPLFDGSAK(1)R	3	0.18694	2	1	1.53658e-06	112.44	DDLLPLFDGSAK(1)R	3	-0.26753	2	0.743	0.748	0.728	1.565	1.509	1.438	0.897	0.951	1.076	0.621	0.712	0.88	1.225	1.216	1.215	1.283	1.281	1.001	1.19646	1.05056	0.827273	1.27755	1.24095
CSA025139.1	180	K	ras-related protein RABA2a	3	2	1	2.42555e-21	161.24	K(1)SLSSDEPAPASIK	2	1.0059	1	1	1.17859e-05	85.006	K(1)SLSSDEPAPASIK	3	0.94914	1	1	2.16408e-14	102.08	K(1)SLSSDEPAPASIK	2	1.5522	2	1.148		1.151	0.976		1.031	0.83		0.727	1.208	1.185	1.227	0.985	1.011	0.99	0.778	0.756	0.771	0.950331		0.93806	0.990863
CSA025186.1	236	K	glyoxylate/succinic semialdehyde reductase 1	3	3	1	1.33752e-14	156.14	SYSPAFPLK(1)HQQK	3	-0.57306	2	1	5.01318e-13	152.4	SYSPAFPLK(1)HQQK	3	1.2894	1	1	1.28976e-06	127.17	SYSPAFPLK(1)HQQK	3	-0.24798	3	0.776	0.809	0.841	1.206	1.287	1.06	1.27	1.099	1.325	0.747	0.729	0.754	1.039	1.064	1.024	1.314	1.31	1.249	1.03882	1.10974	1.11538	1.16073	1.20959
CSA025224.1	40	K	chloroplast stem-loop binding protein of 41 kDa b, chloroplastic isoform X2	3	3	1	0.00734725	92.838	K(1)DFEFVK	2	0.74298	1	1	0.00856794	93.649	K(1)DFEFVK	2	-1.0756	2	1	0.021446	82.287	K(1)DFEFVK	2	-0.084743	3	0.298	0.285	0.414	0.886	0.971	0.995	2.585	2.417	2.289	0.368	0.352	0.374	0.994	1.006	0.991	1.85	1.845	1.857	0.809783	0.809659	1.10695	0.891348	0.965209
CSA025224.1	107	K	chloroplast stem-loop binding protein of 41 kDa b, chloroplastic isoform X2	3	3	1	4.97279e-23	154.51	SDLLPHFETDAVDPK(1)SR	3	-1.8334	1	1	6.40485e-10	93.768	SDLLPHFETDAVDPK(1)SR	3	0.48348	2	1	7.2213e-19	130.4	SDLLPHFETDAVDPK(1)SR	4	-2.2925	4	0.514	0.743	0.647	0.961	0.911	0.938	2.078	1.657	1.883	0.368	0.352	0.374	0.994	1.006	0.991	1.85	1.845	1.857	1.39674	2.1108	1.72995	0.966801	0.905567
CSA025224.1	121	K	chloroplast stem-loop binding protein of 41 kDa b, chloroplastic isoform X2	3	1	1	1.28948e-10	96.135	GKLETENLLK(1)LR	3	1.5581	1	1	2.33648e-07	98.592	LETENLLK(1)LR	3	1.398	2	1	8.188e-12	174.4	LETENLLK(1)LR	3	1.5596	3			0.414			1.153			2.087	0.368	0.352	0.374	0.994	1.006	0.991	1.85	1.845	1.857			1.10695
CSA025224.1	234	K	chloroplast stem-loop binding protein of 41 kDa b, chloroplastic isoform X2	3	3	1	0.00436853	103.74	EFDFGK(1)K	2	0.98666	5	1	0.00563565	91.853	EFDFGK(1)K	3	-0.049647	8	1	0.00460004	105.14	EFDFGK(1)K	3	-0.7619	9	0.192	0.209	0.26	0.972	0.996	0.988	2.687	2.527	2.616	0.368	0.352	0.374	0.994	1.006	0.991	1.85	1.845	1.857	0.521739	0.59375	0.695187	0.977867	0.99006
CSA025287.1	488	K	V-type proton ATPase catalytic subunit A	3	3	1	2.64045e-05	130.75	ITYSLIK(1)HR	3	0.4469	2	1	3.16771e-08	146.03	ITYSLIK(1)HR	3	0.80807	2	1	2.35828e-05	140.35	ITYSLIK(1)HR	3	1.237	2	1.088	1.101	1.044	1.023	0.971	0.94	0.891	0.936	1.061	1.001	1.018	1.005	1.091	1.08	1.084	0.889	0.889	0.892	1.08691	1.08153	1.03881	0.937672	0.899074
CSA025300.1	80	K	4-hydroxy-tetrahydrodipicolinate reductase 2, chloroplastic-like isoform X2	3	3	1	4.32907e-06	136.11	AIVACFK(1)K	2	-0.27875	1	1	0.000217629	136.11	AIVACFK(1)K	2	0.20563	1	1	0.000121038	136.11	AIVACFK(1)K	2	0.4066	1	1.029	1.02	0.934	1.084	1.052	1.059	0.931	0.99	1.136	0.98	1.198	0.803	1.054	0.933	1.056	0.95	0.799	1.177	1.05	0.851419	1.16314	1.02846	1.12755
CSA025304.1	101	K	Eukaryotic peptide chain release factor GTP-binding subunit	3	3	1	0.00271364	102.07	SSGYNVK(1)K	2	0.71691	1	1	0.0010132	113.62	SSGYNVK(1)K	2	0.66546	1	1	0.00102161	113.62	SSGYNVK(1)K	2	0.91583	1	1.105	1.114	1.083	0.958	0.95	0.963	0.938	0.939	0.952	1.169	1.185	1.177	0.941	0.914	0.941	0.918	0.839	0.849	0.945252	0.940084	0.920136	1.01807	1.03939
CSA025312.1	136	K	glutamate decarboxylase 1	3	3	1	0.0037883	92.838	EITDAWK(1)R	2	-0.22223	1	1	0.0331625	68.016	EITDAWK(1)R	2	-1.8749	1	1	0.00473148	92.838	EITDAWK(1)R	2	-1.5243	1	0.745	0.782	0.734	1.63	1.613	1.528	0.816	0.768	0.949	0.839	0.74	0.836	1.415	1.418	1.444	0.764	0.842	0.769	0.887962	1.05676	0.87799	1.15194	1.13752
CSA025321.1	253	K	uncharacterized protein LOC100259668	3	3	1	0.0070157	93.374	YIEVAK(1)K	2	1.2722	2	1	0.00306522	106.36	YIEVAK(1)K	2	0.81182	5	1	0.00442005	106.04	YIEVAK(1)K	3	1.3273	4	0.444	0.758	0.411	1.119	1.089	1.131	2.018	1.42	2.121	0.592	0.474	0.565	1.045	1.07	1.056	1.53	1.61	1.544	0.75	1.59916	0.727434	1.07081	1.01776
CSA025333.1	439	K	aldehyde dehydrogenase family 3 member H1 isoform X1	3	3	1	0.000252067	94.692	FSFDTFTHK(1)K	3	-1.5405	1	1	0.000599092	99.568	FSFDTFTHK(1)K	3	-2.1514	1	1	8.89775e-05	134.57	FSFDTFTHK(1)K	3	0.67759	1	0.7	0.72	0.708	1.501	1.349	1.338	1.058	1.188	1.245	0.649	0.678	0.702	1.023	1.04	1.065	1.453	1.42	1.311	1.07858	1.06195	1.00855	1.46725	1.29712
CSA025404.1	89	K	CDGSH iron-sulfur domain-containing protein NEET	3	3	1	2.13872e-14	119.45	SGTFPLCDGSHVK(1)HNK	4	-1.0158	1	1	1.34361e-22	149	SGTFPLCDGSHVK(1)HNK	3	-0.056632	2	1	4.25189e-13	123.29	SGTFPLCDGSHVK(1)HNK	4	0.34829	1	0.624	0.642	0.656	1.2	1.302	1.293	1.573	1.385	1.409	0.519	0.558	0.426	0.877	0.926	0.973	1.812	1.654	1.881	1.20231	1.15054	1.53991	1.3683	1.40605
CSA025474.1	43	K	isopentenyl-diphosphate Delta-isomerase II	3	3	1	0.000928886	110.38	K(1)TDAGEEGLK	2	-0.24304	1	1	0.00096957	113.99	K(1)TDAGEEGLK	2	0.52281	1	1	0.000618498	110.38	K(1)TDAGEEGLK	2	0.88481	1	0.721	0.745	0.726	1.304	1.354	1.333	1.259	1.137	1.216	0.692	0.709	0.736	1.16	1.197	1.157	1.176	1.184	1.114	1.04191	1.05078	0.986413	1.12414	1.13116
CSA025498.1	494	K	hsp70-Hsp90 organizing protein 3-like	3	3	1	2.26202e-104	268.56	LEPQNPELLDGIK(1)R	2	-0.40176	2	1	6.61606e-59	222.45	LEPQNPELLDGIK(1)R	2	1.4656	2	1	1.58112e-55	242.41	LEPQNPELLDGIK(1)R	2	-0.084694	2	1.252	1.276	1.346	0.826	0.734	0.789	0.813	0.896	0.633	1.226	1.234	1.222	0.845	0.846	0.845	0.843	0.867	0.846	1.02121	1.03404	1.10147	0.977515	0.867612
CSA025511.1	71	K	uncharacterized protein At2g34460, chloroplastic	3	3	1	3.63672e-20	170.95	IFVAGATGNTGK(1)R	2	-1.0415	2	1	1.70953e-12	152.16	IFVAGATGNTGK(1)R	2	-1.5749	1	1	3.51072e-06	124.47	KIFVAGATGNTGK(1)R	3	0.47481	3	0.633	0.643	0.731	1.245	1.204	1.22	1.501	1.497	1.348	0.589	0.6	0.608	1.175	1.182	1.17	1.333	1.217	1.241	1.0747	1.07167	1.2023	1.05957	1.01861
CSA025511.1	207	K	uncharacterized protein At2g34460, chloroplastic	3	3	1	6.8274e-05	128	LQAEK(1)HIR	3	-0.20804	2	1	0.000234256	117.89	LQAEK(1)HIR	3	0.18376	1	1	2.80296e-06	144.9	LQAEK(1)HIR	3	0.5562	1	0.743	0.687	0.876	1.073	1.202	0.91	1.496	1.421	1.446	0.589	0.6	0.608	1.175	1.182	1.17	1.333	1.217	1.241	1.26146	1.145	1.44079	0.913191	1.01692
CSA025511.1	211	K	uncharacterized protein At2g34460, chloroplastic	3	3	1	0.00665219	77.185	K(1)SGINYTIIR	2	1.7549	2	1	0.00311526	85.522	K(1)SGINYTIIR	2	1.2984	1	1	0.00533502	77.185	K(1)SGINYTIIR	2	2.4372	2	0.717	0.742	0.712	1.041	0.962	1.03	1.587	1.599	1.631	0.589	0.6	0.608	1.175	1.182	1.17	1.333	1.217	1.241	1.21732	1.23667	1.17105	0.885957	0.813875
CSA025556.1	36	K	2-alkenal reductase (NADP(+)-dependent)-like	3	3	1	3.03001e-18	173.72	ESDMVVK(1)TGTIR	2	2.416	1	1	2.44687e-23	173.72	ESDMVVK(1)TGTIR	2	0.97986	1	1	2.42046e-10	162.72	ESDMVVK(1)TGTIR	2	1.2274	1	0.794	0.808	0.728	1.186	1.214	1.237	1.262	1.186	1.334	0.526	0.709	0.516	1.228	1.148	1.249	1.41	1.242	1.4	1.50951	1.13963	1.41085	0.965798	1.05749
CSA025587.1	22	K	neutral ceramidase	3	3	1	0.00208994	107.69	GTILGYK(1)R	2	0.57036	1	1	0.00543984	90.709	GTILGYK(1)R	2	0.10184	2	1	0.0238623	69.598	GTILGYK(1)R	2	-0.0076079	2	1.637	1.419	1.487	0.635	0.731	0.73	0.301	0.638	0.42	1.911	1.609	1.711	0.505	0.652	0.609	0.272	0.533	0.439	0.85662	0.881914	0.869082	1.25743	1.12117
CSA025587.1	59	K	neutral ceramidase	3	3	1	5.98361e-05	133.12	MAYIYK(1)AK	3	1.3123	3	1	0.00101566	119.29	MAYIYK(1)AK	2	0.22015	3	1	0.000940414	119.29	MAYIYK(1)AK	2	1.0866	2	1.583	1.496	1.507	0.59	0.657	0.601	0.46	0.585	0.542	1.911	1.609	1.711	0.505	0.652	0.609	0.272	0.533	0.439	0.828362	0.92977	0.880771	1.16832	1.00767
CSA025612.1	210	K	probable cytosolic oligopeptidase A	3	3	1	0.00628113	111.82	VQFNK(1)FK	2	2.6772	1	1	0.00797415	100.19	VQFNK(1)FK	2	3.0097	1	1	0.00208653	124.83	VQFNK(1)FK	2	3.4824	2	1.132	1.035	0.992	1.084	1.144	1.068	0.733	0.856	1.005	1.066	1.098	1.092	1.037	1.034	1.054	0.848	0.805	0.807	1.06191	0.942623	0.908425	1.04532	1.10638
CSA025612.1	231	K	probable cytosolic oligopeptidase A	3	3	1	4.97031e-05	124.07	FEENVLDATK(1)K	2	-0.5215	2	1	0.000361802	96.745	FEENVLDATK(1)K	3	-2.1653	1	1	0.000444276	86.772	FEENVLDATK(1)K	3	-1.3276	1	1.061	1.054	1.012	1.11	1.082	1.193	0.837	0.893	0.804	1.066	1.098	1.092	1.037	1.034	1.054	0.848	0.805	0.807	0.99531	0.959927	0.92674	1.0704	1.04642
CSA025656.1	292	K	ATP-dependent Clp protease proteolytic subunit 3, chloroplastic	3	2	1	0.00964818	69.598	EMVYHK(1)VK	3	-1.7271	1	1	0.00472038	77.732	EMVYHK(1)VK	3	0.72568	1	1	0.00500868	77.732	EMVYHK(1)VK	3	-0.21709	1		1.014	1.018		1.09	1.139		0.955	0.86	0.681	0.698	0.738	1.079	1.083	1.086	1.341	1.312	1.225		1.45272	1.3794		1.00646
CSA025676.1	230	K	UPF0603 protein At1g54780, chloroplastic	3	3	1	4.85509e-24	179.93	YNEAVYSSAK(1)R	2	0.70753	1	1	0.000250847	116.98	YNEAVYSSAK(1)R	2	0.53008	1	1	9.97769e-15	174.72	YNEAVYSSAK(1)R	2	0.15522	3	0.493	0.573	0.503	1.08	1.052	1.072	1.973	1.802	2.008	0.623	0.493	0.55	0.868	0.85	0.807	1.644	1.83	1.794	0.791332	1.16227	0.914545	1.24424	1.23765
CSA025687.1	87	K	60S ribosomal protein L23a	3	3	1	1.60322e-11	151.26	YPLTTESAMK(1)K	2	-1.3568	2	1	2.71246e-14	162.68	YPLTTESAMK(1)K	2	0.88551	2	1	0.00011113	134.49	YPLTTESAMK(1)K	2	-0.32494	2	1.58	1.779	1.761	0.508	0.429	0.404	0.569	0.337	0.271
CSA025687.1	113	K	60S ribosomal protein L23a	3	0	0.999993	0.00690285	66.299	IKDAVK(1)K	3	-0.030686	1	1	0.00427154	85.676	IKDAVK(1)K	3	0.80639	1	0.999966	0.031457	65.224	IKDAVK(1)K	3	0.84629	1
CSA025687.1	121	K	60S ribosomal protein L23a	3	3	1	0.000498595	119.68	MYDIQTK(1)K	2	-0.31893	4	1	0.000850321	116.52	MYDIQTK(1)K	2	0.84126	5	1	0.000897295	114.97	MYDIQTK(1)K	2	-0.15241	4	1.677	1.604	1.597	0.5	0.56	0.504	0.39	0.503	0.478
CSA025687.1	133	K	60S ribosomal protein L23a	3	3	1	0.00123459	71.879	VNTLIRPDGTK(1)K	3	-0.67659	1	1	0.0192193	56.139	VNTLIRPDGTK(1)K	3	0.098079	1	1	0.00194889	73.927	VNTLIRPDGTK(1)K	3	-0.78761	1	1.723	1.659	1.663	0.478	0.594	0.536	0.328	0.362	0.305
CSA025704.1	185	K	aconitate hydratase, cytoplasmic	3	3	1	0.00936935	83.045	QVEIPFK(1)PAR	2	-0.323	1	1	0.00302993	103.08	QVEIPFK(1)PAR	3	-1.1733	2	1	0.000626252	100.69	QVEIPFK(1)PAR	2	-1.2495	1	0.961	0.991	1.11	1.01	1.061	1.028	1.15	1.031	0.814	0.93	0.961	0.949	1	1.004	0.997	1.08	1.066	1.069	1.03333	1.03122	1.16965	1.01	1.05677
CSA025704.1	912	K	aconitate hydratase, cytoplasmic	3	3	1	5.87509e-10	154.84	AVIAK(1)SFER	2	0.57103	2	1	4.89612e-05	134.57	AVIAK(1)SFER	2	-0.33796	2	1	0.00107936	112.36	AVIAK(1)SFER	2	0.13643	2	0.9	0.958	0.889	1.053	1.067	1.079	1.216	1.084	1.204	0.93	0.961	0.949	1	1.004	0.997	1.08	1.066	1.069	0.967742	0.996878	0.936776	1.053	1.06275
CSA025761.1	116	K	cytoplasmic tRNA 2-thiolation protein 1 isoform X2	3	3	1	0.00543019	81.263	DDSLETVK(1)R	2	-1.7944	1	1	0.0137626	70.929	DDSLETVK(1)R	2	-0.33194	1	1	0.00556878	78.098	DDSLETVK(1)R	2	-0.3679	1	1.158	1.204	1.151	0.983	0.951	0.986	0.805	0.772	0.783		1.365			0.838			0.671			0.882051			1.13484
CSA025784.1	24	K	plastidial pyruvate kinase 2	3	3	1	2.55711e-05	126.1	CEVVDGGELK(1)SR	2	0.05559	1	1	1.15266e-05	118.24	CEVVDGGELK(1)SR	2	-0.24532	1	1	2.18066e-05	121.56	CEVVDGGELK(1)SR	2	-0.71439	1	1.089	1.051	1.134	0.969	1.084	1.129	0.955	0.896	0.636	1.053	1.133	1.073	1	1.052	1.042	0.809	0.738	0.775	1.03419	0.927626	1.05685	0.969	1.03042
CSA025803.1	136	K	abscisic stress-ripening protein 2-like	3	3	1	0.000939127	87.184	DPEHAHK(1)HK	3	2.9112	3	1	0.000343125	102.4	KDPEHAHK(1)HK	3	-1.3354	5	1	0.000125243	102.4	KDPEHAHK(1)HK	5	-1.1191	9	1.052	1.081	1.029	1.485	1.45	1.458	0.397	0.416	0.43	1.142	1.22	1.23	1.173	1.112	1.209	0.63	0.504	0.522	0.921191	0.886066	0.836585	1.26598	1.30396
CSA025803.1	175	K	abscisic stress-ripening protein 2-like	3	3	1	3.80641e-07	117	EEDEESHGK(1)K	3	-1.5939	6	1	1.12316e-05	113.4	EEDEESHGK(1)K	3	-0.74654	2	1	1.92854e-09	136.3	KDAKEEDEESHGK(1)K	3	-0.96946	6	0.974	1.011	0.94	1.375	1.449	1.503	0.682	0.545	0.556	1.142	1.22	1.23	1.173	1.112	1.209	0.63	0.504	0.522	0.85289	0.828689	0.764228	1.17221	1.30306
CSA025833.1	216	K	metacaspase-5-like	3	3	1	0.000900043	110.8	QEVYAGASK(1)R	2	0.53912	1	1	9.4536e-09	151.55	QEVYAGASK(1)R	2	0.80872	1	1	0.00040599	130.56	QEVYAGASK(1)R	2	0.88267	1	1.277	1.265	1.272	0.929	0.957	0.826	0.638	0.654	0.737	1.201	1.182	1.174	0.924	0.93	0.994	0.835	0.852	0.811	1.06328	1.07022	1.08348	1.00541	1.02903
CSA025909.1	254	K	PHD finger protein ALFIN-LIKE 4	3	3	1	0.0053851	90.15	CPSCSNK(1)R	2	0.75087	1	1	0.000168694	138.4	CPSCSNK(1)R	2	1.5408	1	1	0.0175713	72.607	CPSCSNK(1)R	2	0.54856	1	1.426	1.429	1.447	0.979	1.032	0.945	0.29	0.27	0.225
CSA025920.1	133	K	aspartokinase 2, chloroplastic isoform X1	3	3	1	0.0010151	108.58	TTNK(1)LLLAGEK	2	-1.3564	1	1	1.32502e-14	169.58	TTNK(1)LLLAGEK	2	-1.0594	2	1	0.000532384	119.96	TTNK(1)LLLAGEK	2	0.63186	2	1.178	1.24	1.172	0.928	0.861	0.862	0.833	0.814	0.896	1.214	1.281	1.243	0.834	0.875	0.911	0.884	0.747	0.759	0.970346	0.967994	0.94288	1.11271	0.984
CSA025923.1	11	K	NADH dehydrogenase	3	3	1	0.00760327	53.751	SGK(1)AMGLQMK	2	-2.393	3	1	0.0110509	52.579	SGK(1)AMGLQMK	2	-2.1717	2	1	0.00587028	62.463	SGK(1)AMGLQMK	2	-1.9963	1	0.851	0.674	0.929	0.791	0.954	0.261	1.633	1.732	2.167
CSA025951.1	84	K	DNA replication licensing factor MCM6	3	3	1	4.6773e-06	133.89	FEPYLK(1)NACK	2	-0.17384	1	1	0.00011383	130.01	FEPYLK(1)NACK	2	0.36286	1	1	0.000141229	141.88	FEPYLK(1)NACK	2	-0.58471	1	1.59	1.347	1.914	0.391	0.498	0.252	0.69	1.039	0.15	1.754	1.739	1.632	0.551	0.526	0.647	0.421	0.428	0.512	0.906499	0.774583	1.17279	0.709619	0.946768
CSA026004.1	119	K	oxygen-evolving enhancer protein 3-2, chloroplastic	3	3	1	0.00285141	110.46	DTDLPLK(1)ER	2	-0.54129	1	1	0.00198523	115.23	DTDLPLK(1)ER	2	0.22386	1	1	0.0011195	102.53	DTDLPLK(1)ER	2	-0.15986	1	0.452	0.549	0.507	0.788	0.836	0.81	2.407	2.095	2.333	0.462	0.46	0.459	0.673	0.618	0.62	2.123	2.162	2.122	0.978355	1.19348	1.10458	1.17088	1.35275
CSA026073.1	125	K	stromal 70 kDa heat shock-related protein, chloroplastic	3	3	1	1.36664e-33	196.27	VGDLLVGQIAK(1)R	3	-1.4292	4	1	5.63444e-32	191.79	VGDLLVGQIAK(1)R	2	0.21822	4	1	5.83437e-08	158.01	VGDLLVGQIAK(1)R	2	-0.59271	4	0.711	0.734	0.674	1.476	1.484	1.451	1.069	1.007	1.172	0.69	0.695	0.658	1.31	1.321	1.329	1.057	1.063	1.096	1.03043	1.05612	1.02432	1.12672	1.12339
CSA026073.1	140	K	stromal 70 kDa heat shock-related protein, chloroplastic	3	3	1	8.64339e-64	226.74	QAVVNSENTFFSVK(1)R	2	1.2943	3	1	8.98406e-48	212.32	QAVVNSENTFFSVK(1)R	2	-2.7371	2	1	2.69783e-22	183.36	QAVVNSENTFFSVK(1)R	2	-1.0103	2	0.824	0.83	0.855	1.368	1.565	1.45	0.982	0.737	0.799	0.69	0.695	0.658	1.31	1.321	1.329	1.057	1.063	1.096	1.1942	1.19424	1.29939	1.04427	1.18471
CSA026073.1	204	K	stromal 70 kDa heat shock-related protein, chloroplastic	3	3	1	0.00491689	107.79	FLNDK(1)VTK	2	-1.0037	4	1	0.00222295	105.2	FLNDK(1)VTK	2	0.30514	4	1	0.000443076	127.76	FLNDK(1)VTK	2	-1.3445	4	0.758	0.752	0.707	1.269	1.253	1.337	1.229	1.241	1.248	0.69	0.695	0.658	1.31	1.321	1.329	1.057	1.063	1.096	1.09855	1.08201	1.07447	0.968702	0.948524
CSA026073.1	319	K	stromal 70 kDa heat shock-related protein, chloroplastic	3	3	1	0.000143045	116.24	RDEGIDLLK(1)DK	3	0.92828	3	1	0.00331675	98.105	RDEGIDLLK(1)DK	3	-1.913	2	1	0.000860261	116.24	RDEGIDLLK(1)DK	3	-0.56425	2	0.602	0.664	0.599	1.382	1.24	1.249	1.394	1.419	1.584	0.69	0.695	0.658	1.31	1.321	1.329	1.057	1.063	1.096	0.872464	0.955396	0.910334	1.05496	0.938683
CSA026073.1	333	K	stromal 70 kDa heat shock-related protein, chloroplastic	3	3	1	0.00325059	108.43	LTETAEK(1)AK	3	-1.8921	2	1	0.00110694	91.549	LTETAEK(1)AK	3	-1.3115	2	1	0.00267213	91.549	LTETAEK(1)AK	3	-0.39626	4	0.58	0.608	0.676	1.203	1.227	1.318	1.655	1.532	1.337	0.69	0.695	0.658	1.31	1.321	1.329	1.057	1.063	1.096	0.84058	0.87482	1.02736	0.918321	0.928842
CSA026073.1	419	K	stromal 70 kDa heat shock-related protein, chloroplastic	3	3	1	0.000113937	127.83	IPAVQELVK(1)R	2	-0.87575	3	1	1.24561e-05	110.08	IPAVQELVK(1)R	3	0.13318	4	1	0.000710961	98.156	IPAVQELVK(1)R	2	-0.95514	3	0.713	0.703	0.741	1.324	1.493	1.305	1.249	1.051	1.22	0.69	0.695	0.658	1.31	1.321	1.329	1.057	1.063	1.096	1.03333	1.01151	1.12614	1.01069	1.1302
CSA026073.1	517	K	stromal 70 kDa heat shock-related protein, chloroplastic	3	3	1	2.14837e-08	147.28	DNK(1)SLGSFR	2	1.1816	2	1	2.12095e-05	141.08	DNK(1)SLGSFR	2	-0.22591	1	1	0.00110078	107.11	DNK(1)SLGSFR	2	-0.93255	1	0.838	0.873	0.807	1.258	1.353	1.366	1.088	0.906	1.005	0.69	0.695	0.658	1.31	1.321	1.329	1.057	1.063	1.096	1.21449	1.25612	1.22644	0.960305	1.02422
CSA026073.1	601	K	stromal 70 kDa heat shock-related protein, chloroplastic	3	3	1	3.02053e-25	133.93	DAIDTK(1)NQADSVVYQTEK	3	0.56216	1	1	1.73884e-29	170.89	DAIDTK(1)NQADSVVYQTEK	3	-0.49083	1	1	2.23728e-22	157.54	DAIDTK(1)NQADSVVYQTEK	3	-0.84683	1	0.734	0.774	0.727	1.195	1.391	1.374	1.366	1.042	1.16	0.69	0.695	0.658	1.31	1.321	1.329	1.057	1.063	1.096	1.06377	1.11367	1.10486	0.912214	1.05299
CSA026073.1	627	K	stromal 70 kDa heat shock-related protein, chloroplastic	3	3	1	5.70464e-31	137.21	VPAPVK(1)EK	3	-0.14962	2	1	0.0258222	76.1	VPAPVK(1)EK	3	0.37156	2	1	0.0242234	54.712	VPAPVK(1)EK	3	-0.072881	1	1.008	0.993	1.044	1.169	1.193	1.079	0.867	0.874	0.882	0.69	0.695	0.658	1.31	1.321	1.329	1.057	1.063	1.096	1.46087	1.42878	1.58663	0.892366	0.903104
CSA026118.1	18	K	tyrosine--tRNA ligase 1, cytoplasmic	3	3	1	0.00199176	108.43	EYCDDIK(1)R	2	0.67748	1	1	0.00211928	102.62	EYCDDIK(1)R	2	0.56029	1	1	0.00496774	92.051	EYCDDIK(1)R	2	0.14412	1	1.323	1.326	1.444	0.809	0.798	0.679	0.697	0.73	0.573
CSA026118.1	78	K	tyrosine--tRNA ligase 1, cytoplasmic	3	3	1	2.46615e-06	140.24	DHFK(1)NDPAAK	3	-2.3454	4	1	1.66413e-05	134.49	DHFK(1)NDPAAK	4	1.0917	3	1	0.00104846	117.79	DHFK(1)NDPAAK	2	1.295	4	1.262	1.325	1.152	0.853	0.876	0.869	0.762	0.642	0.932
CSA026139.1	75	K	actin-depolymerizing factor 2	3	3	1	0.0136591	85.67	FMELK(1)TK	2	-0.065269	2	1	0.00984123	97.431	FMELK(1)TK	3	-0.16655	3	1	0.0208039	87.639	FMELK(1)TK	3	-0.16627	3	1.238	1.192	1.198	0.965	0.978	0.982	0.67	0.763	0.69	0.93	1.204	1.083	0.966	0.946	0.98	1.134	0.776	0.895	1.33118	0.990033	1.10619	0.998965	1.03383
CSA026143.1	199	K	short-chain dehydrogenase TIC 32, chloroplastic	3	3	1	0.000520218	102.52	INDQDSYSDK(1)K	2	-0.68491	2	1	0.000516245	88.021	INDQDSYSDK(1)K	3	-0.24817	1	1	0.000113402	102.9	INDQDSYSDK(1)K	2	-0.41826	2	1.033	1.185	1.014	1.404	1.21	1.56	0.535	0.505	0.331	1.112	1.086	1.147	1.244	1.261	1.268	0.558	0.674	0.55	0.928957	1.09116	0.884045	1.12862	0.959556
CSA026174.1	75	K	protein RETICULATA-RELATED 1, chloroplastic-like	3	3	1	0.00644579	95.605	EFDLQK(1)R	2	-2.6151	1	1	0.00652838	98.009	EFDLQK(1)R	2	-1.72	1	1	0.00435763	106.36	EFDLQK(1)R	2	-1.8275	1	0.974	1.005	0.941	1.204	1.257	1.301	0.89	0.778	0.813	0.855	0.925	0.727	1.105	1.077	1.127	1.087	1.126	1.24	1.13918	1.08649	1.29436	1.08959	1.16713
CSA026186.1	283	K	heat shock protein 90-6, mitochondrial-like	3	3	1	0.00544183	62.338	RDDK(1)GFAHPER	3	0.30028	2	1	0.00860206	61.235	DDK(1)GFAHPER	3	-0.70738	1	1	0.00767938	63.091	RDDK(1)GFAHPER	4	-0.45284	2	1.061	1.099	1.091	0.957	0.801	1.014	1.024	1.138	0.871	1.274	1.249	1.27	0.996	0.984	0.992	0.651	0.651	0.607	0.83281	0.879904	0.859055	0.960843	0.814024
CSA026186.1	649	K	heat shock protein 90-6, mitochondrial-like	3	3	1	0.00102121	82.663	LGDK(1)VASVQISNR	2	0.67378	2	1	1.26843e-05	110.35	LGDK(1)VASVQISNR	2	-0.29933	2	1	0.000997884	68.044	LGDK(1)VASVQISNR	3	0.053202	1	0.92	0.976	0.841	0.906	0.971	1.045	1.358	1.163	1.347	1.274	1.249	1.27	0.996	0.984	0.992	0.651	0.651	0.607	0.722135	0.781425	0.662205	0.909639	0.986789
CSA026213.1	213	K	spermatogenesis-associated protein 20 isoform X1	3	3	1	0.00949383	91.064	EAWDSK(1)R	2	0.014537	1	1	0.00337662	104.75	EAWDSK(1)R	2	-0.27703	1	1	0.0338929	74.255	EAWDSK(1)R	2	-0.62776	1	0.8	0.764	0.769	1.215	1.316	1.201	1.215	1.148	1.294	0.652	0.684	0.672	1.188	1.213	1.237	1.225	1.179	1.159	1.22699	1.11696	1.14435	1.02273	1.08491
CSA026218.1	6	K	40S ribosomal protein S28-2-like	3	3	1	0.00175607	66.989	MESQIK(1)HAIVVK	3	-1.1127	2	1	0.0125054	60.157	MESQIK(1)HAIVVK	3	0.51351	1	1	0.000813168	73.927	MESQIK(1)HAIVVK	3	-0.97723	1	1.043	1.172	1.014	0.904	0.819	1.007	1.122	0.985	1.039	1.034	0.966	0.952	0.951	1.002	0.944	1.006	1.045	1.073	1.0087	1.21325	1.06513	0.950578	0.817365
CSA026274.1	147	K	succinate dehydrogenase subunit 5, mitochondrial	3	3	1	1.55491e-09	153.88	MIHLK(1)MR	3	-0.81911	5	1	0.00106316	132.72	MIHLK(1)MR	3	-1.0557	6	1	0.000334873	129.96	MIHLK(1)MR	3	-0.16865	6	1.234	1.054	1.127	0.864	0.953	0.903	0.802	1.042	0.938	0.979	0.976	0.975	0.982	0.99	1.031	1.051	1.043	1.016	1.26047	1.07992	1.1559	0.879837	0.962626
CSA026350.1	19	K	2-methylene-furan-3-one reductase	3	3	1	0.0113692	83.045	VGSQVK(1)SLK	2	2.1341	2	1	0.000122996	131.83	VGSQVK(1)SLK	2	1.4922	2	1	0.000508654	126.19	VGSQVK(1)SLK	2	0.77441	2	0.525	0.434	0.423	1.148	1.135	1.143	1.827	1.956	2.084	0.505	0.434	0.305	0.94	0.906	0.922	1.736	1.826	2.076	1.0396	1	1.38689	1.22128	1.25276
CSA026350.1	59	K	2-methylene-furan-3-one reductase	3	3	1	0.0143723	97.068	LLALK(1)PK	2	0.3625	1	1	0.00453509	108.24	LLALK(1)PK	2	0.32782	2	1	0.0137783	94.407	LLALK(1)PK	2	1.0927	1	0.485	0.554	0.464	1.239	1.188	1.222	1.795	1.677	1.897	0.505	0.434	0.305	0.94	0.906	0.922	1.736	1.826	2.076	0.960396	1.2765	1.52131	1.31809	1.31126
CSA026351.1	124	K	2-methylene-furan-3-one reductase	3	3	1	4.47261e-27	178.15	VVAAALNPVDFK(1)R	2	-2.4783	4	1	3.00223e-17	161.48	VVAAALNPVDFK(1)R	2	-0.7712	2	1	6.40624e-23	190.1	VVAAALNPVDFK(1)R	2	-1.5995	3	0.455	0.243	0.201	0.929	0.819	0.662	2.23	2.671	3.155	0.46	0.466	0.478	0.963	0.943	0.966	1.765	1.805	1.758	0.98913	0.521459	0.420502	0.964694	0.868505
CSA026365.1	150	K	phosphoenolpyruvate carboxylase, housekeeping isozyme-like	3	3	1	0.00370012	106.36	LVGELK(1)K	2	0.031018	2	1	0.00305389	106.04	LVGELK(1)K	2	0.78652	2	1	0.00442005	106.04	LVGELK(1)K	2	-0.15051	2	1.202	1.214	1.171	0.986	1.028	1	0.716	0.664	0.724	1.102	1.104	1.153	1.058	1.049	1.034	0.747	0.775	0.755	1.09074	1.09964	1.01561	0.931947	0.979981
CSA026365.1	184	K	phosphoenolpyruvate carboxylase, housekeeping isozyme-like	3	3	1	0.000434934	122.33	SLLQK(1)HGR	3	2.2502	5	1	0.000869701	101.46	SLLQK(1)HGR	2	-0.83558	3	1	0.00059167	107.29	SLLQK(1)HGR	2	-0.51689	4	0.9	0.952	0.924	1.215	1.308	1.326	1.021	0.813	0.817	1.102	1.104	1.153	1.058	1.049	1.034	0.747	0.775	0.755	0.816697	0.862319	0.801388	1.14839	1.2469
CSA026365.1	882	K	phosphoenolpyruvate carboxylase, housekeeping isozyme-like	3	3	1	2.28074e-24	181.98	DLLEGDPYLK(1)QR	3	-1.5702	2	1	2.22205e-23	174.9	DLLEGDPYLK(1)QR	3	-0.028726	2	1	8.28339e-08	158.01	DLLEGDPYLK(1)QR	3	-1.2095	2	1.025	1.133	1.039	1.253	1.208	1.179	0.733	0.604	0.768	1.102	1.104	1.153	1.058	1.049	1.034	0.747	0.775	0.755	0.930127	1.02627	0.901127	1.18431	1.15157
CSA026367.1	31	K	14-3-3-like protein D isoform X1	3	3	1	0.00021092	122.7	YDEMVDAMK(1)K	3	-1.3963	2	1	0.000267749	122.7	YDEMVDAMK(1)K	3	-0.35732	2	1	0.000756737	117.09	YDEMVDAMK(1)K	3	-0.55573	2	1.17	1.247	1.168	1.106	1.05	1.12	0.634	0.579	0.577	1.061	1.015	1.082	1.022	1.026	1.024	0.885	0.912	0.877	1.10273	1.22857	1.07948	1.08219	1.02339
CSA026367.1	53	K	14-3-3-like protein D isoform X1	3	3	1	2.16422e-28	176.49	NLLSVGYK(1)NVVGSR	2	0.64468	2	1	5.14189e-28	179.81	NLLSVGYK(1)NVVGSR	2	0.64685	2	1	1.75446e-24	190.19	NLLSVGYK(1)NVVGSR	2	0.87195	2	0.998	0.973	1.033	1.036	1.094	1.102	1.049	1.027	0.877	1.061	1.015	1.082	1.022	1.026	1.024	0.885	0.912	0.877	0.940622	0.958621	0.954713	1.0137	1.06628
CSA026367.1	83	K	14-3-3-like protein D isoform X1	3	3	0.999999	0.000104418	91.62	EESKGNEVNAK(1)R	3	-1.5533	1	1	1.09701e-05	117.03	EESKGNEVNAK(1)R	3	0.43099	1	1	3.40044e-05	105.66	EESKGNEVNAK(1)R	3	-0.66167	1	1.16	1.138	1.112	1.067	1.146	1.068	0.697	0.667	0.76	1.061	1.015	1.082	1.022	1.026	1.024	0.885	0.912	0.877	1.09331	1.12118	1.02773	1.04403	1.11696
CSA026394.1	528	K	long chain acyl-CoA synthetase 9, chloroplastic	3	2	1	0.0238407	82.261	EVYK(1)VDER	2	0.81006	1	1	0.00325142	102.06	EVYK(1)VDER	2	0.37715	1	0.998769	0.0366267	53.6	TK(0.001)EVYK(0.999)VDER	3	0.054245	1	0.786	0.775		1.096	1.132		1.386	1.341		0.765	0.722	0.763	1.137	1.159	1.157	1.151	1.171	1.115	1.02745	1.07341		0.96394	0.976704
CSA026411.1	215	K	probable lactoylglutathione lyase, chloroplastic	3	2	1	0.00116193	91.701	AFGMELLQK(1)R	2	0.7595	2	1	0.0117592	70.808	AFGMELLQK(1)R	2	0.68994	1	1	0.00144934	78.556	AFGMELLQK(1)R	3	1.0801	1	0.534	0.586		1.085	1.124		1.887	1.694		0.675	0.612	0.631	1.016	1.052	1.049	1.429	1.45	1.452	0.791111	0.957516		1.06791	1.06844
CSA026448.1	307	K	UDP-glycosyltransferase 708A6-like	3	3	1	3.74349e-05	92.039	SGCPFLWVLK(1)SSK	3	-0.8978	1	1	0.00022893	90.707	SGCPFLWVLK(1)SSK	3	-0.35996	2	1	4.27474e-05	100.11	SGCPFLWVLK(1)SSK	2	1.3609	1	0.988	1.088	1.024	0.913	0.834	0.904	1.219	1.119	1.148	1.365	1.343	1.269	0.929	0.961	0.946	0.584	0.603	0.653	0.72381	0.810127	0.806935	0.982777	0.867846
CSA026464.1	98	K	hydroxypyruvate reductase-like isoform X4	3	3	1	0.000539394	99.941	LNADVISCAK(1)R	2	-0.73142	1	1	0.00240614	83.53	LNADVISCAK(1)R	2	-1.0504	1	1	0.000283641	110.91	LNADVISCAK(1)R	2	-0.42965	1	1.045	1.108	1.132	1.201	1.24	1.118	0.757	0.611	0.652	0.927	0.848	0.927	1.122	1.092	1.121	0.969	1.111	0.951	1.12729	1.3066	1.22114	1.07041	1.13553
CSA026566.1	16	K	elongation factor 1-delta-like	3	3	1	0.0150903	68.515	K(1)LDEYLLTR	2	-1.6214	1	1	0.00319677	86.114	K(1)LDEYLLTR	2	-3.2134	1	1	0.0118941	69.864	K(1)LDEYLLTR	2	-3.797	1	1.13	1.162	1.165	0.965	0.961	0.982	0.878	0.837	0.76	1.2	1.221	1.23	0.965	0.966	0.972	0.747	0.712	0.679	0.941667	0.951679	0.947154	1	0.994824
CSA026607.1	19	K	peptidyl-prolyl cis-trans isomerase Pin1	3	3	1	0.000197584	89.382	ASHILIK(1)HQGSR	3	-0.86163	3	1	1.44807e-05	111.94	ASHILIK(1)HQGSR	3	-1.5015	2	1	1.05966e-05	108.72	ASHILIK(1)HQGSR	3	-0.60759	3	1.072	1.094	0.965	0.978	0.781	0.926	0.976	1.168	1.241	1.242	1.43	1.322	0.8	0.777	0.86	0.881	0.646	0.783	0.863124	0.765035	0.729955	1.2225	1.00515
CSA026607.1	77	K	peptidyl-prolyl cis-trans isomerase Pin1	3	3	1	1.39158e-06	140.17	FSDCSSAK(1)R	2	-1.2357	1	1	0.00225587	107.95	FSDCSSAK(1)R	2	0.5668	1	1	4.3559e-05	142	FSDCSSAK(1)R	2	-0.26924	1	1.337	1.236	1.274	0.852	0.892	0.888	0.618	0.783	0.657	1.242	1.43	1.322	0.8	0.777	0.86	0.881	0.646	0.783	1.07649	0.864336	0.963691	1.065	1.14801
CSA026696.1	28	K	5-methyltetrahydropteroyltriglutamate--homocysteine methyltransferase-like	3	3	0.999976	0.012972	54.486	K(1)SSAEDLKK	3	-0.89316	1	0.999999	0.00907274	71.03	K(1)SSAEDLKK	3	0.50878	1	1	0.00952716	103.91	K(1)SSAEDLKK	2	0.44104	3	1.577	1.582	1.397	0.769	0.827	0.796	0.255	0.232	0.52	1.549	1.603	1.521	0.792	0.76	0.784	0.436	0.411	0.443	1.01808	0.9869	0.918475	0.97096	1.08816
CSA026696.1	35	K	5-methyltetrahydropteroyltriglutamate--homocysteine methyltransferase-like	3	3	1	0.00428914	88.495	SSAEDLK(1)K	3	0.71396	2	1	0.0070399	88.495	SSAEDLK(1)K	3	-0.13294	3	1	0.00263612	99.815	SSAEDLK(1)K	3	-0.34413	2	1.504	1.496	1.447	0.784	0.827	0.776	0.378	0.388	0.442	1.549	1.603	1.521	0.792	0.76	0.784	0.436	0.411	0.443	0.970949	0.93325	0.951348	0.989899	1.08816
CSA026696.1	142	K	5-methyltetrahydropteroyltriglutamate--homocysteine methyltransferase-like	3	3	1	0.00115975	118.28	AVDEYK(1)EAK	2	0.91039	2	1	1.78271e-05	141.88	AVDEYK(1)EAK	2	-0.0028176	1	1	6.39014e-05	141.88	AVDEYK(1)EAK	2	0.65695	1	1.511	1.538	1.538	0.727	0.748	0.747	0.433	0.404	0.291	1.549	1.603	1.521	0.792	0.76	0.784	0.436	0.411	0.443	0.975468	0.959451	1.01118	0.917929	0.984211
CSA026696.1	508	K	5-methyltetrahydropteroyltriglutamate--homocysteine methyltransferase-like	3	3	1	0.00371692	111.61	EEINK(1)VVK	3	2.4483	2	1	0.00145971	113.71	EEINK(1)VVK	2	2.8091	1	1	0.00374265	99.815	EEINK(1)VVK	2	1.8651	2	1.179	1.323	1.294	0.93	0.89	0.845	0.827	0.629	0.668	1.549	1.603	1.521	0.792	0.76	0.784	0.436	0.411	0.443	0.761136	0.825328	0.850756	1.17424	1.17105
CSA026709.1	49	K	chalcone synthase 2-like, partial	3	3	1	5.93493e-05	117.2	ITNSEHK(1)TELK	3	0.62833	1	1	0.000446205	92.856	ITNSEHK(1)TELK	3	-1.3648	1	1	0.00139402	79.089	ITNSEHK(1)TELK	3	-0.23764	1	1.493	1.447	1.406	0.587	0.71	0.629	0.638	0.612	0.715
CSA026777.1	63	K	protein IN2-1 homolog B	3	3	1	0.00102938	97.431	DHVENYK(1)K	2	0.41171	2	1	0.000884294	97.431	DHVENYK(1)K	3	-0.123	3	1	0.00100196	109.66	DHVENYK(1)K	2	0.32397	4	0.604	0.69	0.628	1.11	1.307	1.209	1.721	1.291	1.577	0.614	0.606	0.604	1.134	1.071	1.111	1.371	1.419	1.377	0.983713	1.13861	1.03974	0.978836	1.22035
CSA026793.1	90	K	peroxiredoxin-2B	3	3	1	4.05247e-07	146.16	AWAK(1)TFPENK	2	-0.36019	2	1	7.35206e-13	166.14	AWAK(1)TFPENK	2	0.44295	3	1	1.40505e-09	166.14	AWAK(1)TFPENK	2	1.254	2	1.105	1.135	1.208	0.97	0.931	0.965	0.924	0.92	0.692	1.154	1.144	1.175	0.975	0.965	0.945	0.838	0.85	0.835	0.957539	0.992133	1.02809	0.994872	0.964767
CSA026793.1	96	K	peroxiredoxin-2B	3	3	1	0.00276773	81.017	TFPENK(1)HVK	2	-1.0145	4	1	0.000821268	91.867	TFPENK(1)HVK	3	-0.676	2	1	0.000867642	87.258	TFPENK(1)HVK	3	-0.72495	2	1.088	1.06	1.092	0.992	1.08	0.988	0.928	0.885	0.904	1.154	1.144	1.175	0.975	0.965	0.945	0.838	0.85	0.835	0.942808	0.926573	0.929362	1.01744	1.11917
CSA026796.1	179	K	glyceraldehyde-3-phosphate dehydrogenase A, chloroplastic	3	3	1	4.34596e-12	156.81	EGAGK(1)HLQAGAK	3	0.75371	6	1	5.5101e-05	96.745	EGAGK(1)HLQAGAK	3	1.7953	3	1	2.59479e-05	127.02	EGAGK(1)HLQAGAK	3	-0.29724	5	0.177	0.508	0.353	0.679	0.783	0.72	3.072	2.233	2.767	0.458	0.43	0.392	0.957	0.967	0.938	1.852	1.812	1.907	0.386463	1.1814	0.90051	0.709509	0.809721
[truncated: 4,133 more rows]
[truncated: 10 more columns]
