# Supplementary material for: Proteome and Acetyl-Proteome Profiling of Camellia sinensis cv. ‘Anji Baicha’ during Periodic Albinism Reveals Alterations in Photosynthetic and Secondary Metabolite Biosynthetic Pathways
Source: Front Plant Sci. 2017 Dec 11;8:2104. doi: 10.3389/fpls.2017.02104 (PMC5732353; doi:10.3389/fpls.2017.02104)
Supplement: Table S5 — ASs and APs in photosynthesis and carbon fixation pathways. [file Table5.XLSX]

## Sheet: Sheet1
Protein accession	Position	Gene name	S2/S1 Ratio	S2/S1 P value	S3/S1 Ratio	S3/S1 P value	S3/S2 Ratio	S3/S2 P value
Photosynthesis
CSA027312.1	100	psaE; photosystem I subunit IV	1.201	0.305	0.831	0.416	0.692	0.00727
CSA027312.1	119	psaE; photosystem I subunit IV	1.121	0.636	1.021	0.943	0.910	0.547
CSA000107.1	124	psaF; photosystem I subunit III	1.426	0.000785	1.435	0.00564	1.006	0.9
CSA000107.1	100	psaF; photosystem I subunit III
CSA033864.1	103	psaN; photosystem I subunit PsaN	0.836	0.112	0.559	0.00538	0.669	6.01e-05
CSA033864.1	109	psaN; photosystem I subunit PsaN	1.056	0.566	0.858	0.0511	0.812	0.0784
CSA033864.1	143	psaN; photosystem I subunit PsaN
CSA033864.1	159	psaN; photosystem I subunit PsaN
CSA033864.1	148	psaN; photosystem I subunit PsaN
CSA000627.1	274	psbO; photosystem II oxygen-evolving enhancer protein 1	0.910	0.287	0.633	0.0117	0.696	0.0046
CSA000627.1	125	psbO; photosystem II oxygen-evolving enhancer protein 1
CSA000627.1	133	psbO; photosystem II oxygen-evolving enhancer protein 1
CSA000627.1	150	psbO; photosystem II oxygen-evolving enhancer protein 1
CSA000627.1	243	psbO; photosystem II oxygen-evolving enhancer protein 1
CSA000627.1	98	psbO; photosystem II oxygen-evolving enhancer protein 1
CSA000627.1	144	psbO; photosystem II oxygen-evolving enhancer protein 1
CSA026004.1	119	psbQ; photosystem II oxygen-evolving enhancer protein 3	1.169	0.09	0.977	0.773	0.836	0.0477
CSA026004.1	180	psbQ; photosystem II oxygen-evolving enhancer protein 3
CSA033259.1	224	psbP; photosystem II oxygen-evolving enhancer protein 2	0.989	0.93	1.157	0.342	1.170	0.175
CSA033259.1	149	psbP; photosystem II oxygen-evolving enhancer protein 2
CSA033259.1	150	psbP; photosystem II oxygen-evolving enhancer protein 2
CSA033259.1	255	psbP; photosystem II oxygen-evolving enhancer protein 2
CSA011430.1	111	psbP; photosystem II oxygen-evolving enhancer protein 2
CSA033259.1	119	psbP; photosystem II oxygen-evolving enhancer protein 2
CSA033259.1	247	psbP; photosystem II oxygen-evolving enhancer protein 2
CSA013374.1	73	psbS; photosystem II 22kDa protein
CSA013374.1	176	psbS; photosystem II 22kDa protein
CSA013374.1	75	psbS; photosystem II 22kDa protein
CSA005888.1	116	psb27; photosystem II Psb27 protein	1.130	0.138	1.027	0.732	0.909	0.117
CSA003688.1	350	petH; ferredoxin--NADP+ reductase [EC:1.18.1.2]	1.142	0.0026	1.611	3.99e-05	1.411	0.000168
CSA025110.1	85	petH; ferredoxin--NADP+ reductase [EC:1.18.1.2]
CSA025110.1	166	petH; ferredoxin--NADP+ reductase [EC:1.18.1.2]	0.590	0.00934	0.584	0.00851	0.989	0.782
CSA025110.1	141	petH; ferredoxin--NADP+ reductase [EC:1.18.1.2]
CSA025110.1	81	petH; ferredoxin--NADP+ reductase [EC:1.18.1.2]
CSA008999.1	120	petF; ferredoxin
CSA009759.1	121	ATPF0B; F-type H+-transporting ATPase subunit b	0.759	0.000107	0.771	0.000267	1.016	0.569
CSA009759.1	158	ATPF0B; F-type H+-transporting ATPase subunit b	0.737	0.0252	0.650	0.0148	0.882	0.126
CSA035765.1	36	ATPF0B; F-type H+-transporting ATPase subunit b
CSA036932.1	50	ATPF1B; F-type H+-transporting ATPase subunit beta [EC:3.6.3.14]
CSA015733.1	231	ATPF1D; F-type H+-transporting ATPase subunit delta	1.089	0.151	0.828	0.0271	0.761	8.42e-05
CSA015733.1	117	ATPF1D; F-type H+-transporting ATPase subunit delta
CSA001404.1	66	ATPF1G; F-type H+-transporting ATPase subunit gamma	0.802	0.351	0.849	0.487	1.059	0.483
CSA001404.1	345	ATPF1G; F-type H+-transporting ATPase subunit gamma	0.769	0.123	0.748	0.111	0.973	0.647
CSA029276.1	67	ATPF1G; F-type H+-transporting ATPase subunit gamma	2.227	0.000147	2.164	0.00114	0.972	0.713
CSA029276.1	151	ATPF1G; F-type H+-transporting ATPase subunit gamma
CSA029276.1	174	ATPF1G; F-type H+-transporting ATPase subunit gamma	0.838	0.0697	0.586	0.00204	0.699	0.00241
CSA001404.1	150	ATPF1G; F-type H+-transporting ATPase subunit gamma
CSA001404.1	160	ATPF1G; F-type H+-transporting ATPase subunit gamma
CSA001404.1	173	ATPF1G; F-type H+-transporting ATPase subunit gamma
CSA001404.1	346	ATPF1G; F-type H+-transporting ATPase subunit gamma
CSA024064.1	184	LHCA1; light-harvesting complex I chlorophyll a/b binding protein 1	1.344	0.0445	2.411	0.000127	1.793	0.00173
CSA024064.1	165	LHCA1; light-harvesting complex I chlorophyll a/b binding protein 1
CSA016587.1	228	LHCA3; light-harvesting complex I chlorophyll a/b binding protein 3
CSA030476.1	37	LHCB1; light-harvesting complex II chlorophyll a/b binding protein 1	1.237	0.0409	0.806	0.0823	0.652	0.000133
CSA030476.1	41	LHCB1; light-harvesting complex II chlorophyll a/b binding protein 1	1.104	0.741	0.769	0.488	0.696	0.0323
CSA030474.1	41	LHCB1; light-harvesting complex II chlorophyll a/b binding protein 1
CSA019572.1	124	LHCB2; light-harvesting complex II chlorophyll a/b binding protein 2
CSA019572.1	215	LHCB2; light-harvesting complex II chlorophyll a/b binding protein 2
CSA002361.1	141	LHCB3; light-harvesting complex II chlorophyll a/b binding protein 3
CSA010862.1	212	LHCB4; light-harvesting complex II chlorophyll a/b binding protein 4	1.060	0.415	0.943	0.468	0.890	0.141
CSA014653.1	37	LHCB4; light-harvesting complex II chlorophyll a/b binding protein 4	0.900	0.112	0.657	0.0014	0.731	0.00281
CSA014653.1	210	LHCB4; light-harvesting complex II chlorophyll a/b binding protein 4	1.006	0.919	0.813	0.0448	0.809	0.0274
CSA010862.1	232	LHCB4; light-harvesting complex II chlorophyll a/b binding protein 4
CSA010862.1	242	LHCB4; light-harvesting complex II chlorophyll a/b binding protein 4
CSA014653.1	230	LHCB4; light-harvesting complex II chlorophyll a/b binding protein 4
CSA014653.1	240	LHCB4; light-harvesting complex II chlorophyll a/b binding protein 4
CSA004532.1	113	LHCB5; light-harvesting complex II chlorophyll a/b binding protein 5	1.032	0.908	1.527	0.128	1.479	0.0443
CSA004532.1	215	LHCB5; light-harvesting complex II chlorophyll a/b binding protein 5	1.162	0.126	0.920	0.453	0.792	0.0194
CSA004532.1	220	LHCB5; light-harvesting complex II chlorophyll a/b binding protein 5
Carbon fixation in photosynthetic organisms
CSA005116.1	38	ALDO; fructose-bisphosphate aldolase, class I [EC:4.1.2.13]	1.091	0.7	1.302	0.242	1.194	0.007
CSA005116.1	103	ALDO; fructose-bisphosphate aldolase, class I [EC:4.1.2.13]	1.435	0.186	2.483	0.00686	1.731	0.00124
CSA005116.1	306	ALDO; fructose-bisphosphate aldolase, class I [EC:4.1.2.13]
CSA009966.1	59	ALDO; fructose-bisphosphate aldolase, class I [EC:4.1.2.13]	1.097	0.203	1.336	0.00311	1.218	0.00654
CSA009966.1	80	ALDO; fructose-bisphosphate aldolase, class I [EC:4.1.2.13]	1.131	0.0931	1.251	0.0152	1.106	0.00826
CSA009966.1	348	ALDO; fructose-bisphosphate aldolase, class I [EC:4.1.2.13]	1.001	0.982	0.670	0.000206	0.670	2.6e-05
CSA009966.1	389	ALDO; fructose-bisphosphate aldolase, class I [EC:4.1.2.13]	1.154	0.0109	1.091	0.0562	0.945	0.0173
CSA009966.1	291	ALDO; fructose-bisphosphate aldolase, class I [EC:4.1.2.13]
CSA009966.1	129	ALDO; fructose-bisphosphate aldolase, class I [EC:4.1.2.13]
CSA011908.1	75	ALDO; fructose-bisphosphate aldolase, class I [EC:4.1.2.13]
CSA011908.1	289	ALDO; fructose-bisphosphate aldolase, class I [EC:4.1.2.13]
CSA011908.1	282	ALDO; fructose-bisphosphate aldolase, class I [EC:4.1.2.13]
CSA011908.1	382	ALDO; fructose-bisphosphate aldolase, class I [EC:4.1.2.13]
CSA011908.1	341	ALDO; fructose-bisphosphate aldolase, class I [EC:4.1.2.13]
CSA011908.1	348	ALDO; fructose-bisphosphate aldolase, class I [EC:4.1.2.13]	0.776	0.00079	0.598	0.00303	0.770	0.0527
CSA035207.1	38	ALDO; fructose-bisphosphate aldolase, class I [EC:4.1.2.13]	1.256	0.000657	1.426	0.000809	1.135	0.0137
CSA035207.1	87	ALDO; fructose-bisphosphate aldolase, class I [EC:4.1.2.13]	0.968	0.556	0.700	0.0212	0.723	0.0391
CSA035207.1	103	ALDO; fructose-bisphosphate aldolase, class I [EC:4.1.2.13]	1.092	0.153	1.164	0.359	1.066	0.676
CSA035207.1	225	ALDO; fructose-bisphosphate aldolase, class I [EC:4.1.2.13]
CSA035207.1	354	ALDO; fructose-bisphosphate aldolase, class I [EC:4.1.2.13]
CSA018950.1	111	GAPA; glyceraldehyde-3-phosphate dehydrogenase (NADP+) (phosphorylating) [EC:1.2.1.13]	1.153	0.243	0.895	0.18	0.776	0.091
CSA018950.1	159	GAPA; glyceraldehyde-3-phosphate dehydrogenase (NADP+) (phosphorylating) [EC:1.2.1.13]	0.608	0.0524	0.550	0.0367	0.905	0.333
CSA018950.1	314	GAPA; glyceraldehyde-3-phosphate dehydrogenase (NADP+) (phosphorylating) [EC:1.2.1.13]
CSA018950.1	88	GAPA; glyceraldehyde-3-phosphate dehydrogenase (NADP+) (phosphorylating) [EC:1.2.1.13]
CSA026796.1	179	GAPA; glyceraldehyde-3-phosphate dehydrogenase (NADP+) (phosphorylating) [EC:1.2.1.13]	0.926	0.809	1.759	0.0766	1.899	0.00563
CSA026796.1	186	GAPA; glyceraldehyde-3-phosphate dehydrogenase (NADP+) (phosphorylating) [EC:1.2.1.13]	0.982	0.796	1.389	0.00182	1.415	0.000854
CSA026796.1	237	GAPA; glyceraldehyde-3-phosphate dehydrogenase (NADP+) (phosphorylating) [EC:1.2.1.13]	1.212	0.213	0.801	0.243	0.661	0.00128
CSA026796.1	321	GAPA; glyceraldehyde-3-phosphate dehydrogenase (NADP+) (phosphorylating) [EC:1.2.1.13]	1.322	0.0283	1.453	0.00949	1.100	0.0802
CSA026796.1	294	GAPA; glyceraldehyde-3-phosphate dehydrogenase (NADP+) (phosphorylating) [EC:1.2.1.13]
CSA024921.1	16	GGAT; glutamate--glyoxylate aminotransferase [EC:2.6.1.4 2.6.1.2 2.6.1.44]	1.607	0.000146	1.412	0.00442	0.878	0.0267
CSA024921.1	406	GGAT; glutamate--glyoxylate aminotransferase [EC:2.6.1.4 2.6.1.2 2.6.1.44]	1.436	0.0223	1.722	0.00967	1.199	0.0478
CSA024921.1	462	GGAT; glutamate--glyoxylate aminotransferase [EC:2.6.1.4 2.6.1.2 2.6.1.44]
CSA000918.1	90	GGAT; glutamate--glyoxylate aminotransferase [EC:2.6.1.4 2.6.1.2 2.6.1.44]
CSA000918.1	406	GGAT; glutamate--glyoxylate aminotransferase [EC:2.6.1.4 2.6.1.2 2.6.1.44]
CSA001833.1	836	GAPDH; glyceraldehyde 3-phosphate dehydrogenase [EC:1.2.1.12]
CSA001833.1	60	GAPDH; glyceraldehyde 3-phosphate dehydrogenase [EC:1.2.1.12]
CSA023938.1	356	GAPDH; glyceraldehyde 3-phosphate dehydrogenase [EC:1.2.1.12]
CSA016761.1	93	GAPDH; glyceraldehyde 3-phosphate dehydrogenase [EC:1.2.1.12]	1.000	0.996	2.535	0.000682	2.534	0.000937
CSA016761.1	128	GAPDH; glyceraldehyde 3-phosphate dehydrogenase [EC:1.2.1.12]
CSA016761.1	76	GAPDH; glyceraldehyde 3-phosphate dehydrogenase [EC:1.2.1.12]
CSA016761.1	81	GAPDH; glyceraldehyde 3-phosphate dehydrogenase [EC:1.2.1.12]
CSA016761.1	134	GAPDH; glyceraldehyde 3-phosphate dehydrogenase [EC:1.2.1.12]
CSA016761.1	138	GAPDH; glyceraldehyde 3-phosphate dehydrogenase [EC:1.2.1.12]
CSA016761.1	273	GAPDH; glyceraldehyde 3-phosphate dehydrogenase [EC:1.2.1.12]
CSA036938.1	21	rbcL; ribulose-bisphosphate carboxylase large chain [EC:4.1.1.39]	1.213	0.0639	1.135	0.275	0.936	0.347
CSA036938.1	25	rbcL; ribulose-bisphosphate carboxylase large chain [EC:4.1.1.39]	0.968	0.774	0.961	0.724	0.993	0.93
CSA036938.1	198	rbcL; ribulose-bisphosphate carboxylase large chain [EC:4.1.1.39]	0.878	0.0052	0.545	2.16e-05	0.621	5.25e-06
CSA036938.1	216	rbcL; ribulose-bisphosphate carboxylase large chain [EC:4.1.1.39]	0.719	0.0526	0.582	0.0224	0.810	0.104
CSA036938.1	267	rbcL; ribulose-bisphosphate carboxylase large chain [EC:4.1.1.39]	0.855	0.114	0.606	0.00763	0.709	0.00234
CSA036938.1	320	rbcL; ribulose-bisphosphate carboxylase large chain [EC:4.1.1.39]	1.636	6.96e-05	1.900	3.65e-05	1.161	0.0024
CSA036938.1	371	rbcL; ribulose-bisphosphate carboxylase large chain [EC:4.1.1.39]	0.958	0.417	1.650	0.000126	1.722	8.24e-05
CSA036938.1	479	rbcL; ribulose-bisphosphate carboxylase large chain [EC:4.1.1.39]
CSA020605.1	60	rbcL; ribulose-bisphosphate carboxylase large chain [EC:4.1.1.39]	0.871	0.168	0.367	0.00118	0.421	2.05e-07
CSA020605.1	300	rbcL; ribulose-bisphosphate carboxylase large chain [EC:4.1.1.39]	0.812	0.0422	0.702	0.00868	0.864	0.019
CSA020605.1	190	rbcL; ribulose-bisphosphate carboxylase large chain [EC:4.1.1.39]
CSA020605.1	297	rbcL; ribulose-bisphosphate carboxylase large chain [EC:4.1.1.39]
CSA004763.1	63	rbcS; ribulose-bisphosphate carboxylase small chain [EC:4.1.1.39]	1.282	0.0712	1.609	0.0112	1.255	0.011
CSA004763.1	110	rbcS; ribulose-bisphosphate carboxylase small chain [EC:4.1.1.39]	1.189	0.183	1.217	0.12	1.024	0.552
CSA004763.1	144	rbcS; ribulose-bisphosphate carboxylase small chain [EC:4.1.1.39]	1.100	0.336	1.862	0.000883	1.692	2.08e-05
CSA004763.1	160	rbcS; ribulose-bisphosphate carboxylase small chain [EC:4.1.1.39]	1.232	0.000528	1.035	0.577	0.840	0.022
CSA020587.1	152	rbcS; ribulose-bisphosphate carboxylase small chain [EC:4.1.1.39]	0.911	0.215	1.415	0.00285	1.553	0.000133
CSA030501.1	331	E1.1.1.39; malate dehydrogenase (decarboxylating) [EC:1.1.1.39]
CSA030501.1	88	E1.1.1.39; malate dehydrogenase (decarboxylating) [EC:1.1.1.39]	1.467	0.000795	1.154	0.0697	0.787	0.0104
CSA030501.1	324	E1.1.1.39; malate dehydrogenase (decarboxylating) [EC:1.1.1.39]	0.744	0.00722	0.514	0.0012	0.691	0.00661
CSA009025.1	125	E1.1.1.40; malate dehydrogenase (oxaloacetate-decarboxylating)(NADP+) [EC:1.1.1.40]
CSA009025.1	131	E1.1.1.40; malate dehydrogenase (oxaloacetate-decarboxylating)(NADP+) [EC:1.1.1.40]
CSA009025.1	19	E1.1.1.40; malate dehydrogenase (oxaloacetate-decarboxylating)(NADP+) [EC:1.1.1.40]	1.027	0.841	1.361	0.0297	1.325	0.0335
CSA009025.1	26	E1.1.1.40; malate dehydrogenase (oxaloacetate-decarboxylating)(NADP+) [EC:1.1.1.40]	0.575	0.00194	0.509	0.00126	0.886	0.109
CSA009025.1	121	E1.1.1.40; malate dehydrogenase (oxaloacetate-decarboxylating)(NADP+) [EC:1.1.1.40]
CSA004180.1	12	E1.1.1.40; malate dehydrogenase (oxaloacetate-decarboxylating)(NADP+) [EC:1.1.1.40]
CSA004180.1	19	E1.1.1.40; malate dehydrogenase (oxaloacetate-decarboxylating)(NADP+) [EC:1.1.1.40]
CSA001133.1	67	E1.1.1.40; malate dehydrogenase (oxaloacetate-decarboxylating)(NADP+) [EC:1.1.1.40]
CSA001133.1	354	E1.1.1.40; malate dehydrogenase (oxaloacetate-decarboxylating)(NADP+) [EC:1.1.1.40]
CSA001133.1	555	E1.1.1.40; malate dehydrogenase (oxaloacetate-decarboxylating)(NADP+) [EC:1.1.1.40]
CSA024830.1	91	E1.1.1.40; malate dehydrogenase (oxaloacetate-decarboxylating)(NADP+) [EC:1.1.1.40]
CSA024830.1	98	E1.1.1.40; malate dehydrogenase (oxaloacetate-decarboxylating)(NADP+) [EC:1.1.1.40]
CSA024830.1	203	E1.1.1.40; malate dehydrogenase (oxaloacetate-decarboxylating)(NADP+) [EC:1.1.1.40]
CSA017616.1	161	E1.1.1.82; malate dehydrogenase (NADP+) [EC:1.1.1.82]	0.638	0.0034	0.625	0.00364	0.979	0.566
CSA017616.1	323	E1.1.1.82; malate dehydrogenase (NADP+) [EC:1.1.1.82]	0.886	0.358	1.195	0.232	1.350	0.0242
CSA017616.1	243	E1.1.1.82; malate dehydrogenase (NADP+) [EC:1.1.1.82]
CSA017616.1	300	E1.1.1.82; malate dehydrogenase (NADP+) [EC:1.1.1.82]
CSA017616.1	332	E1.1.1.82; malate dehydrogenase (NADP+) [EC:1.1.1.82]
CSA000242.1	105	MDH1; malate dehydrogenase [EC:1.1.1.37]
CSA000242.1	208	MDH1; malate dehydrogenase [EC:1.1.1.37]
CSA000242.1	237	MDH1; malate dehydrogenase [EC:1.1.1.37]
CSA021592.1	134	MDH1; malate dehydrogenase [EC:1.1.1.37]
CSA034775.1	587	MDH2; malate dehydrogenase [EC:1.1.1.37]	0.919	0.0746	0.897	0.0944	0.976	0.585
CSA034775.1	601	MDH2; malate dehydrogenase [EC:1.1.1.37]	0.913	0.217	0.714	0.0501	0.782	0.101
CSA034775.1	607	MDH2; malate dehydrogenase [EC:1.1.1.37]	0.934	0.057	0.913	0.0703	0.978	0.533
CSA034775.1	756	MDH2; malate dehydrogenase [EC:1.1.1.37]
CSA009850.1	333	MDH2; malate dehydrogenase [EC:1.1.1.37]
CSA012136.1	233	MDH2; malate dehydrogenase [EC:1.1.1.37]
CSA012136.1	253	MDH2; malate dehydrogenase [EC:1.1.1.37]
CSA028965.1	334	MDH2; malate dehydrogenase [EC:1.1.1.37]
CSA012532.1	480	E2.2.1.1; transketolase [EC:2.2.1.1]	1.092	0.255	1.094	0.203	1.003	0.958
CSA012532.1	710	E2.2.1.1; transketolase [EC:2.2.1.1]	0.762	0.042	1.476	0.0172	1.937	0.00266
CSA012532.1	727	E2.2.1.1; transketolase [EC:2.2.1.1]	1.155	0.00747	1.111	0.071	0.962	0.293
CSA012532.1	133	E2.2.1.1; transketolase [EC:2.2.1.1]
CSA012532.1	314	E2.2.1.1; transketolase [EC:2.2.1.1]
CSA012532.1	322	E2.2.1.1; transketolase [EC:2.2.1.1]
CSA012532.1	376	E2.2.1.1; transketolase [EC:2.2.1.1]
CSA012532.1	402	E2.2.1.1; transketolase [EC:2.2.1.1]
CSA012532.1	606	E2.2.1.1; transketolase [EC:2.2.1.1]
CSA001665.1	776	E2.2.1.1; transketolase [EC:2.2.1.1]
CSA003118.1	182	TPI; triosephosphate isomerase (TIM) [EC:5.3.1.1]	1.108	0.116	1.919	4.86e-05	1.731	0.000172
CSA003118.1	261	TPI; triosephosphate isomerase (TIM) [EC:5.3.1.1]	1.057	0.0908	2.256	7.8e-05	2.134	9.06e-05
CSA003118.1	270	TPI; triosephosphate isomerase (TIM) [EC:5.3.1.1]	0.892	0.0746	1.160	0.00815	1.301	0.00684
CSA003118.1	318	TPI; triosephosphate isomerase (TIM) [EC:5.3.1.1]
CSA019750.1	4	TPI; triosephosphate isomerase (TIM) [EC:5.3.1.1]	0.853	0.00868	0.705	0.0178	0.826	0.102
CSA019750.1	21	TPI; triosephosphate isomerase (TIM) [EC:5.3.1.1]
CSA031519.1	50	PGK; phosphoglycerate kinase [EC:2.7.2.3]	1.132	0.304	1.092	0.658	0.965	0.827
CSA031519.1	129	PGK; phosphoglycerate kinase [EC:2.7.2.3]	1.339	0.00163	2.058	4.03e-05	1.537	0.000339
CSA031519.1	136	PGK; phosphoglycerate kinase [EC:2.7.2.3]	1.091	0.36	1.202	0.0253	1.102	0.243
CSA031519.1	16	PGK; phosphoglycerate kinase [EC:2.7.2.3]
CSA031519.1	341	PGK; phosphoglycerate kinase [EC:2.7.2.3]
CSA031519.1	125	PGK; phosphoglycerate kinase [EC:2.7.2.3]
CSA013129.1	451	PGK; phosphoglycerate kinase [EC:2.7.2.3]
CSA000795.1	207	PRK; phosphoribulokinase [EC:2.7.1.19]	1.563	0.00127	1.953	0.000942	1.250	0.0157
CSA000795.1	230	PRK; phosphoribulokinase [EC:2.7.1.19]
CSA000795.1	69	PRK; phosphoribulokinase [EC:2.7.1.19]
CSA000795.1	298	PRK; phosphoribulokinase [EC:2.7.1.19]
CSA030111.1	25	FBP; fructose-1,6-bisphosphatase I [EC:3.1.3.11]	0.489	0.00255	0.359	0.00121	0.733	0.0245
CSA030111.1	332	FBP; fructose-1,6-bisphosphatase I [EC:3.1.3.11]	0.828	0.00204	0.822	0.0105	0.994	0.88
CSA011564.1	616	ppc; phosphoenolpyruvate carboxylase [EC:4.1.1.31]
CSA026365.1	150	ppc; phosphoenolpyruvate carboxylase [EC:4.1.1.31]	0.898	0.0228	0.865	0.029	0.964	0.397
CSA026365.1	184	ppc; phosphoenolpyruvate carboxylase [EC:4.1.1.31]	1.483	0.000824	1.410	0.0297	0.951	0.61
CSA026365.1	882	ppc; phosphoenolpyruvate carboxylase [EC:4.1.1.31]	1.216	0.00676	0.972	0.765	0.799	0.0364
CSA026365.1	143	ppc; phosphoenolpyruvate carboxylase [EC:4.1.1.31]
CSA026365.1	350	ppc; phosphoenolpyruvate carboxylase [EC:4.1.1.31]
CSA026365.1	491	ppc; phosphoenolpyruvate carboxylase [EC:4.1.1.31]
CSA026365.1	623	ppc; phosphoenolpyruvate carboxylase [EC:4.1.1.31]
CSA034492.1	317	E3.1.3.37; sedoheptulose-bisphosphatase [EC:3.1.3.37]	1.702	0.00908	1.970	0.00582	1.158	0.0848
CSA034492.1	366	E3.1.3.37; sedoheptulose-bisphosphatase [EC:3.1.3.37]	0.907	0.64	1.429	0.116	1.574	0.0104
CSA034492.1	303	E3.1.3.37; sedoheptulose-bisphosphatase [EC:3.1.3.37]
CSA001352.1	99	GOT1; aspartate aminotransferase, cytoplasmic [EC:2.6.1.1]	1.066	0.369	1.038	0.812	0.974	0.866
CSA001352.1	174	GOT1; aspartate aminotransferase, cytoplasmic [EC:2.6.1.1]
CSA001352.1	322	GOT1; aspartate aminotransferase, cytoplasmic [EC:2.6.1.1]
CSA001188.1	142	GOT2; aspartate aminotransferase, mitochondrial [EC:2.6.1.1]
CSA034512.1	385	GPT; alanine transaminase [EC:2.6.1.2]	0.823	8.41e-05	0.650	8.72e-05	0.789	0.001
CSA034512.1	495	GPT; alanine transaminase [EC:2.6.1.2]	0.885	0.000332	0.872	0.00137	0.985	0.432
CSA034512.1	273	GPT; alanine transaminase [EC:2.6.1.2]
CSA034512.1	305	GPT; alanine transaminase [EC:2.6.1.2]
CSA030673.1	84	ppdK; pyruvate, orthophosphate dikinase [EC:2.7.9.1]
CSA030673.1	244	ppdK; pyruvate, orthophosphate dikinase [EC:2.7.9.1]
CSA028219.1	31	E4.1.1.49; phosphoenolpyruvate carboxykinase (ATP) [EC:4.1.1.49]
CSA028330.1	95	E4.1.1.49; phosphoenolpyruvate carboxykinase (ATP) [EC:4.1.1.49]
CSA001723.1	61	rpiA; ribose 5-phosphate isomerase A [EC:5.3.1.6]
