# Supplementary material for: Proteome and Acetyl-Proteome Profiling of Camellia sinensis cv. ‘Anji Baicha’ during Periodic Albinism Reveals Alterations in Photosynthetic and Secondary Metabolite Biosynthetic Pathways
Source: Front Plant Sci. 2017 Dec 11;8:2104. doi: 10.3389/fpls.2017.02104 (PMC5732353; doi:10.3389/fpls.2017.02104)
Supplement: Table S6 — ASs and APs in theanine, flavonoid, and carotenoid biosynthetic pathways. [file Table6.XLSX]

## Sheet: Sheet1
Protein accession	Position	Gene name	S2/S1 Ratio	S2/S1 P value	S3/S1 Ratio	S3/S1 P value	S3/S2 Ratio	S3/S2 P value
Theanine biosynthesis pathway
CSA001114.1	169	GS; glnA; glutamine synthetase [EC:6.3.1.2]	1.057	0.301	1.130	0.0933	1.069	0.15
CSA001114.1	177	GS; glnA; glutamine synthetase [EC:6.3.1.2]	0.916	0.0447	1.178	0.00501	1.286	0.000256
CSA001114.1	327	GS; glnA; glutamine synthetase [EC:6.3.1.2]	1.060	0.467	1.119	0.189	1.056	0.216
CSA006044.1	48	GS; glnA; glutamine synthetase [EC:6.3.1.2]	1.022	0.109	1.000	0.996	0.979	0.246
CSA006044.1	267	GS; glnA; glutamine synthetase [EC:6.3.1.2]	1.047	0.0895	1.119	0.149	1.068	0.348
CSA010785.1	48	GS; glnA; glutamine synthetase [EC:6.3.1.2]	0.860	0.415	0.939	0.793	1.092	0.651
CSA010785.1	267	GS; glnA; glutamine synthetase [EC:6.3.1.2]	0.827	0.000139	0.838	0.00132	1.014	0.53
CSA010785.1	326	GS; glnA; glutamine synthetase [EC:6.3.1.2]
CSA010785.1	106	GS; glnA; glutamine synthetase [EC:6.3.1.2]
CSA010785.1	272	GS; glnA; glutamine synthetase [EC:6.3.1.2]
CSA003654.1	262	E1.4.7.1; glutamate synthase (ferredoxin) [EC:1.4.7.1]	1.041	0.578	1.009	0.915	0.969	0.502
CSA003654.1	265	E1.4.7.1; glutamate synthase (ferredoxin) [EC:1.4.7.1]	0.863	0.0735	1.214	0.0387	1.407	0.00313
CSA003654.1	336	E1.4.7.1; glutamate synthase (ferredoxin) [EC:1.4.7.1]
CSA003654.1	397	E1.4.7.1; glutamate synthase (ferredoxin) [EC:1.4.7.1]	1.971	0.00304	1.574	0.0182	0.799	0.00646
CSA003654.1	837	E1.4.7.1; glutamate synthase (ferredoxin) [EC:1.4.7.1]	0.928	0.575	0.742	0.121	0.799	0.033
CSA003654.1	52	E1.4.7.1; glutamate synthase (ferredoxin) [EC:1.4.7.1]
CSA003654.1	365	E1.4.7.1; glutamate synthase (ferredoxin) [EC:1.4.7.1]
CSA003654.1	141	E1.4.7.1; glutamate synthase (ferredoxin) [EC:1.4.7.1]
CSA003654.1	238	E1.4.7.1; glutamate synthase (ferredoxin) [EC:1.4.7.1]
CSA003654.1	258	E1.4.7.1; glutamate synthase (ferredoxin) [EC:1.4.7.1]
CSA003654.1	446	E1.4.7.1; glutamate synthase (ferredoxin) [EC:1.4.7.1]
CSA003654.1	529	E1.4.7.1; glutamate synthase (ferredoxin) [EC:1.4.7.1]
CSA003654.1	995	E1.4.7.1; glutamate synthase (ferredoxin) [EC:1.4.7.1]
CSA024921.1	16	ALT; GGAT; glutamate--glyoxylate aminotransferase [EC:2.6.1.4 2.6.1.2 2.6.1.44]	1.607	0.000146	1.412	0.00442	0.878	0.0267
CSA024921.1	406	ALT; GGAT; glutamate--glyoxylate aminotransferase [EC:2.6.1.4 2.6.1.2 2.6.1.44]	1.436	0.0223	1.722	0.00967	1.199	0.0478
CSA034512.1	385	ALT; GPT; alanine transaminase [EC:2.6.1.2]	0.823	8.41e-05	0.650	8.72e-05	0.789	0.001
CSA034512.1	495	ALT; GPT; alanine transaminase [EC:2.6.1.2]	0.885	0.000332	0.872	0.00137	0.985	0.432
CSA000918.1	90	ALT; GGAT; glutamate--glyoxylate aminotransferase [EC:2.6.1.4 2.6.1.2 2.6.1.44]
CSA000918.1	406	ALT; GGAT; glutamate--glyoxylate aminotransferase [EC:2.6.1.4 2.6.1.2 2.6.1.44]
CSA024921.1	462	ALT; GGAT; glutamate--glyoxylate aminotransferase [EC:2.6.1.4 2.6.1.2 2.6.1.44]
CSA034512.1	273	ALT; GPT; alanine transaminase [EC:2.6.1.2]
CSA034512.1	305	ALT; GPT; alanine transaminase [EC:2.6.1.2]
Flavonoid biosynthesis pathway
CSA016076.1	40	PAL; phenylalanine ammonia-lyase [EC:4.3.1.24]	0.840	0.287	0.483	0.00748	0.575	0.0843
CSA016076.1	540	PAL; phenylalanine ammonia-lyase [EC:4.3.1.24]	0.873	0.132	0.651	0.0295	0.745	0.135
CSA023534.1	543	PAL; phenylalanine ammonia-lyase [EC:4.3.1.24]	0.884	0.085	0.790	0.0173	0.894	0.252
CSA016076.1	388	PAL; phenylalanine ammonia-lyase [EC:4.3.1.24]
CSA016076.1	495	PAL; phenylalanine ammonia-lyase [EC:4.3.1.24]
CSA023534.1	233	PAL; phenylalanine ammonia-lyase [EC:4.3.1.24]
CSA032883.1	526	PAL; phenylalanine ammonia-lyase [EC:4.3.1.24]
CSA032883.1	642	PAL; phenylalanine ammonia-lyase [EC:4.3.1.24]
CSA016076.1	340	PAL; phenylalanine ammonia-lyase [EC:4.3.1.24]
CSA016076.1	367	PAL; phenylalanine ammonia-lyase [EC:4.3.1.24]
CSA023534.1	343	PAL; phenylalanine ammonia-lyase [EC:4.3.1.24]
CSA023534.1	370	PAL; phenylalanine ammonia-lyase [EC:4.3.1.24]
CSA023534.1	391	PAL; phenylalanine ammonia-lyase [EC:4.3.1.24]
CSA023534.1	498	PAL; phenylalanine ammonia-lyase [EC:4.3.1.24]
CSA022101.1	240	C4H; CYP73A; trans-cinnamate 4-monooxygenase [EC:1.14.13.11]
CSA003473.1	512	4CL; 4-coumarate--CoA ligase [EC:6.2.1.12]	1.097	0.0443	0.659	0.000714	0.601	9.27e-06
CSA036366.1	144	4CL; 4-coumarate--CoA ligase [EC:6.2.1.12]
CSA036366.1	516	4CL; 4-coumarate--CoA ligase [EC:6.2.1.12]
CSA024718.1	62	CHS; chalcone synthase [EC:2.3.1.74]	0.641	0.0625	0.447	0.00741	0.698	0.221
CSA024718.1	121	CHS; chalcone synthase [EC:2.3.1.74]
CSA024718.1	182	CHS; chalcone synthase [EC:2.3.1.74]
CSA024718.1	277	CHS; chalcone synthase [EC:2.3.1.74]
CSA024718.1	323	CHS; chalcone synthase [EC:2.3.1.74]
CSA024718.1	112	CHS; chalcone synthase [EC:2.3.1.74]
CSA024718.1	320	CHS; chalcone synthase [EC:2.3.1.74]
CSA023536.1	123	E5.5.1.6; chalcone isomerase [EC:5.5.1.6]	0.952	0.17	0.870	0.0521	0.914	0.208
CSA008261.1	47	E5.5.1.6; chalcone isomerase [EC:5.5.1.6]
CSA004930.1	110	F3H; E1.14.11.9; naringenin 3-dioxygenase [EC:1.14.11.9]	0.583	0.00113	0.625	0.00284	1.072	0.559
CSA004930.1	272	F3H; E1.14.11.9; naringenin 3-dioxygenase [EC:1.14.11.9]	1.257	0.301	1.121	0.555	0.892	0.624
CSA004930.1	336	F3H; E1.14.11.9; naringenin 3-dioxygenase [EC:1.14.11.9]	0.563	0.00359	0.493	0.00211	0.876	0.436
CSA004930.1	19	F3H; E1.14.11.9; naringenin 3-dioxygenase [EC:1.14.11.9]
CSA004930.1	189	F3H; E1.14.11.9; naringenin 3-dioxygenase [EC:1.14.11.9]
CSA004930.1	101	F3H; E1.14.11.9; naringenin 3-dioxygenase [EC:1.14.11.9]
CSA003707.1	117	FLS; flavonol synthase [EC:1.14.11.23]	0.976	0.869	1.132	0.538	1.160	0.527
CSA003707.1	269	FLS; flavonol synthase [EC:1.14.11.23]
CSA003707.1	279	FLS; flavonol synthase [EC:1.14.11.23]
CSA003707.1	316	FLS; flavonol synthase [EC:1.14.11.23]
CSA011508.1	348	ANS; leucoanthocyanidin dioxygenase [EC:1.14.11.19]
CSA011508.1	344	ANS; leucoanthocyanidin dioxygenase [EC:1.14.11.19]
CSA035767.1	287	ANS; leucoanthocyanidin dioxygenase [EC:1.14.11.19]
CSA035767.1	344	ANS; leucoanthocyanidin dioxygenase [EC:1.14.11.19]
CSA011986.1	14	ANR; anthocyanidin reductase [EC:1.3.1.77]	1.211	0.254	1.179	0.239	0.974	0.884
CSA011986.1	287	ANR; anthocyanidin reductase [EC:1.3.1.77]
CSA011986.1	89	ANR; anthocyanidin reductase [EC:1.3.1.77]
CSA011986.1	94	ANR; anthocyanidin reductase [EC:1.3.1.77]
CSA011986.1	278	ANR; anthocyanidin reductase [EC:1.3.1.77]
Carotenoid biosynthesis pathway
CSA031818.1	194	ABA2; xanthoxin dehydrogenase [EC:1.1.1.288]	0.836	0.065	0.575	7.52e-05	0.687	0.0166
CSA031818.1	98	ABA2; xanthoxin dehydrogenase [EC:1.1.1.288]
CSA034026.1	612	crtISO; prolycopene isomerase [EC:5.2.1.13]	0.931	0.488	1.7	0.00265	1.825	0.00125
CSA034255.1	317	LUT5; beta-ring hydroxylase [EC:1.14.-.-]	0.924	0.208	0.594	0.000743	0.643	0.000477
CSA020820.1	556	PDS; 15-cis-phytoene desaturase [EC:1.3.5.5]
CSA009708.1	115	GGPS; geranylgeranyl diphosphate synthase, type II [EC:2.5.1.1 2.5.1.10 2.5.1.29]
CSA009630.1	127	GGPS; geranylgeranyl diphosphate synthase, type II [EC:2.5.1.1 2.5.1.10 2.5.1.29]
CSA009630.1	339	GGPS; geranylgeranyl diphosphate synthase, type II [EC:2.5.1.1 2.5.1.10 2.5.1.29]
