# Supplementary material for: Proteome and Acetyl-Proteome Profiling of Camellia sinensis cv. ‘Anji Baicha’ during Periodic Albinism Reveals Alterations in Photosynthetic and Secondary Metabolite Biosynthetic Pathways
Source: Front Plant Sci. 2017 Dec 11;8:2104. doi: 10.3389/fpls.2017.02104 (PMC5732353; doi:10.3389/fpls.2017.02104)
Supplement: Table S7 — Overlapped proteins in succinylome and acetylome of ‘Anji Baicha.’ [file Table7.XLSX]

## Sheet: Overlap identified protein
Protein accession	Protein description	Number of acetylation sites	Number of succinylation sites	KEGG Gene
CSA021373.1	ABC transporter E family member 2	2	3
CSA010136.1	acyl-CoA-binding protein isoform X2	1	3
CSA019255.1	acetyl-CoA carboxylase 1	3	1	ACACA; acetyl-CoA carboxylase / biotin carboxylase 1 [EC:6.4.1.2 6.3.4.14]
CSA025704.1	aconitate hydratase, cytoplasmic	6	5	ACO; aconitate hydratase [EC:4.2.1.3]
CSA020068.1	ACT domain-containing protein ACR11-like	2	1
CSA001515.1	transcriptional adapter ADA2b isoform X2	3	1
CSA017776.1	glucose-1-phosphate adenylyltransferase small subunit, chloroplastic/amyloplastic	4	3	glgC; glucose-1-phosphate adenylyltransferase [EC:2.7.7.27]
CSA012185.1	adenosine kinase 2	7	3	E2.7.1.20; adenosine kinase [EC:2.7.1.20]
CSA013381.1	alpha-galactosidase 1-like	2	1	E3.2.1.22B; alpha-galactosidase [EC:3.2.1.22]
CSA016856.1	protein argonaute 4	2	3
CSA005189.1	protein argonaute 4-like isoform X2	12	1
CSA035317.1	serine--glyoxylate aminotransferase	2	1	AGXT; alanine-glyoxylate transaminase / serine-glyoxylate transaminase / serine-pyruvate transaminase [EC:2.6.1.44 2.6.1.45 2.6.1.51]
CSA022255.1	ankyrin repeat domain-containing protein 2B-like	3	2
CSA034512.1	alanine aminotransferase 2	2	2	GPT; alanine transaminase [EC:2.6.1.2]
CSA031536.1	alanine--tRNA ligase	3	2	AARS; alanyl-tRNA synthetase [EC:6.1.1.7]
CSA034340.1	NADP-dependent glyceraldehyde-3-phosphate dehydrogenase	3	3	gapN; glyceraldehyde-3-phosphate dehydrogenase (NADP+) [EC:1.2.1.9]
CSA015898.1	aldehyde dehydrogenase family 2 member B4, mitochondrial	2	1
CSA021835.1	aldehyde dehydrogenase family 2 member B7, mitochondrial-like	1	5	ALDH; aldehyde dehydrogenase (NAD+) [EC:1.2.1.3]
CSA021191.1	annexin D1	7	4
CSA035557.1	annexin D2-like	2	2
CSA024921.1	uncharacterized protein LOC100261274	2	4	GGAT; glutamate--glyoxylate aminotransferase [EC:2.6.1.4 2.6.1.2 2.6.1.44]
CSA026350.1	2-methylene-furan-3-one reductase	2	1
CSA013466.1	triose phosphate/phosphate translocator, chloroplastic isoform X2	2	2
CSA019424.1	2-methyl-6-phytyl-1,4-hydroquinone methyltransferase, chloroplastic-like	2	1	VTE3; MPBQ/MSBQ methyltransferase [EC:2.1.1.295]
CSA014385.1	glucose-1-phosphate adenylyltransferase large subunit 3, chloroplastic/amyloplastic	2	1	glgC; glucose-1-phosphate adenylyltransferase [EC:2.7.7.27]
CSA029832.1	aminopeptidase M1-like	3	1
CSA019238.1	aminopeptidase M1	5	2
CSA022065.1	probable Xaa-Pro aminopeptidase P isoform X1	2	1
CSA018282.1	L-ascorbate peroxidase 1, cytosolic isoform X2	2	2	E1.11.1.11; L-ascorbate peroxidase [EC:1.11.1.11]
CSA017238.1	L-ascorbate peroxidase 2, cytosolic-like	5	3	E1.11.1.11; L-ascorbate peroxidase [EC:1.11.1.11]
CSA028263.1	anthranilate synthase alpha subunit 2, chloroplastic-like isoform X2	2	1
CSA000266.1	asparagine synthetase	2	2	asnB; asparagine synthase (glutamine-hydrolysing) [EC:6.3.5.4]
CSA001352.1	aspartate aminotransferase, cytoplasmic	2	1	GOT1; aspartate aminotransferase, cytoplasmic [EC:2.6.1.1]
CSA011966.1	uncharacterized protein LOC100245204 isoform X2	2	1
CSA027893.1	protein ASPARTIC PROTEASE IN GUARD CELL 2	2	2
CSA025321.1	uncharacterized protein LOC100259668	2	1
CSA027594.1	enoyl-CoA hydratase/isomerase family protein	1	2	HIBCH; 3-hydroxyisobutyryl-CoA hydrolase [EC:3.1.2.4]
CSA001667.1	elongation factor 1-alpha	5	5	EEF1A; elongation factor 1-alpha
CSA004796.1	uncharacterized protein LOC102631030	6	2
CSA033845.1	uncharacterized protein LOC100243428	3	1
CSA003232.1	elongation factor 1-gamma	7	6
CSA019996.1	aminomethyltransferase, mitochondrial	5	2	gcvT; aminomethyltransferase [EC:2.1.2.10]
CSA027652.1	pyrophosphate--fructose 6-phosphate 1-phosphotransferase subunit beta-like	6	2	pfp; diphosphate-dependent phosphofructokinase [EC:2.7.1.90]
CSA000238.1	uncharacterized protein LOC104598575	2	1	E2.2.1.2; transaldolase [EC:2.2.1.2]
CSA014832.1	NADH dehydrogenase	1	2
CSA018927.1	uncharacterized protein LOC100263834	2	1
CSA021713.1	uncharacterized protein LOC108994897 isoform X3	2	1
CSA020480.1	ubiquinone biosynthesis protein COQ9-B, mitochondrial	1	2
CSA011007.1	phospho-2-dehydro-3-deoxyheptonate aldolase 1, chloroplastic-like	4	1	E2.5.1.54; 3-deoxy-7-phosphoheptulonate synthase [EC:2.5.1.54]
CSA002130.1	calcyclin-binding protein	2	2
CSA009317.1	60S ribosomal protein L9	1	2	RP-L9e; large subunit ribosomal protein L9e
CSA008732.1	40S ribosomal protein S18-like	5	1	RP-S18e; small subunit ribosomal protein S18e
CSA035105.1	18.1 kDa class I heat shock protein	5	1	HSP20; HSP20 family protein
CSA033762.1	dihydrolipoyllysine-residue acetyltransferase component 2 of pyruvate dehydrogenase complex,mitochondrial	4	2	DLAT; pyruvate dehydrogenase E2 component (dihydrolipoamide acetyltransferase) [EC:2.3.1.12]
CSA018101.1	probable nucleoredoxin 1	4	2
CSA011222.1	probable aldo-keto reductase 2	2	1
CSA024653.1	coatomer subunit zeta-1-like	2	1
CSA035589.1	coatomer subunit alpha-1	6	3
CSA001747.1	GMP synthase	3	1	guaA; GMP synthase (glutamine-hydrolysing) [EC:6.3.5.2]
CSA026982.1	puromycin-sensitive aminopeptidase	1	2	pepN; aminopeptidase N [EC:3.4.11.2]
CSA028646.1	puromycin-sensitive aminopeptidase isoform X1	3	1
CSA021126.1	6-phosphogluconate dehydrogenase, decarboxylating 1, chloroplastic	1	3	PGD; 6-phosphogluconate dehydrogenase [EC:1.1.1.44 1.1.1.343]
CSA022786.1	2-alkenal reductase (NADP(+)-dependent) isoform X1	3	1
CSA034220.1	uncharacterized protein LOC103502522	2	1
CSA022045.1	peroxidase 12	1	3	E1.11.1.7; peroxidase [EC:1.11.1.7]
CSA023469.1	isoflavone reductase-like protein	5	1
CSA016290.1	60S ribosomal protein L30-like	3	1	RP-L30e; large subunit ribosomal protein L30e
CSA024905.1	probable carboxylesterase 5	3	1
CSA019423.1	proteasome subunit alpha type-6	3	1	PSMA6; 20S proteasome subunit alpha 1 [EC:3.4.25.1]
CSA005282.1	protein TRI1-like	2	1
CSA009116.1	transcription-associated protein 1 isoform X1	3	1
CSA034848.1	Succinyl-CoA ligase	4	3	LSC2; succinyl-CoA synthetase beta subunit [EC:6.2.1.4 6.2.1.5]
CSA002220.1	60S ribosomal protein L14-1	5	1	RP-L14e; large subunit ribosomal protein L14e
CSA015826.1	clathrin light chain 1-like	2	1
CSA003436.1	NADP-dependent D-sorbitol-6-phosphate dehydrogenase	3	1
CSA017234.1	transmembrane 9 superfamily member 10-like	1	2
CSA020996.1	far upstream element-binding protein 1	2	1
CSA006880.1	uncharacterized protein At2g27730, mitochondrial	2	2
CSA009376.1	Ran-binding protein 1-b-like protein	2	2
CSA019241.1	ran-binding protein 1 homolog c-like	3	2
CSA030920.1	26S proteasome non-ATPase regulatory subunit 1 homolog A	5	2	PSMD1; 26S proteasome regulatory subunit N2
CSA011032.1	60S ribosomal protein L18a-like	6	1	RP-L18Ae; large subunit ribosomal protein L18Ae
CSA032934.1	bifunctional purine biosynthesis protein PurH-like isoform X2	5	2	purH; phosphoribosylaminoimidazolecarboxamide formyltransferase / IMP cyclohydrolase [EC:2.1.2.3 3.5.4.10]
CSA033352.1	predicted protein	1	2	RP-S27Ae; small subunit ribosomal protein S27Ae
CSA021739.1	uncharacterized protein At5g02240	2	2
CSA002568.1	uncharacterized protein At5g02240-like	3	3
CSA034828.1	uncharacterized protein LOC100257236	2	1
CSA003078.1	14-3-3-like protein B	3	1
CSA026367.1	14-3-3-like protein D isoform X1	3	1
CSA030792.1	uncharacterized protein LOC102624690	1	2
CSA012532.1	transketolase, chloroplastic	4	6	E2.2.1.1; transketolase [EC:2.2.1.1]
CSA034838.1	6-phosphogluconate dehydrogenase, decarboxylating 3	3	1	PGD; 6-phosphogluconate dehydrogenase [EC:1.1.1.44 1.1.1.343]
CSA030173.1	14-3-3-like protein A	3	1
CSA022278.1	T-complex protein 1 subunit zeta-like isoform X2	4	3
CSA012999.1	40S ribosomal protein S7	2	2	RP-S7e; small subunit ribosomal protein S7e
CSA012572.1	60S ribosomal protein L4	6	1	RP-L4e; large subunit ribosomal protein L4e
CSA031789.1	reticulon-like protein B8	2	2
CSA023347.1	uncharacterized protein LOC100248601	2	1	CML; calcium-binding protein CML
CSA015535.1	clathrin heavy chain 1	9	2	CLTC; clathrin heavy chain
CSA018901.1	40S ribosomal protein S14-3	2	1	RP-S14e; small subunit ribosomal protein S14e
CSA015316.1	activator of 90 kDa heat shock protein ATPase homolog	2	3
CSA035726.1	60S ribosomal protein L7-2-like	1	5	RP-L7e; large subunit ribosomal protein L7e
CSA031427.1	60S ribosomal protein L7-2-like	5	1	RP-L7e; large subunit ribosomal protein L7e
CSA017726.1	UBP1-associated protein 2C	2	1	HNRNPA1_3; heterogeneous nuclear ribonucleoprotein A1/A3
CSA033338.1	protein LURP-one-related 12-like	2	1
CSA015145.1	T-complex protein 1 subunit delta	4	3
CSA017796.1	uncharacterized protein LOC109279843 precursor	2	4
CSA031849.1	uncharacterized protein LOC108994590	3	1
CSA011978.1	60S ribosomal protein L44-like	5	2	RP-L44e; large subunit ribosomal protein L44e
CSA021639.1	endo-1,3;1,4-beta-D-glucanase	2	3
CSA011948.1	proteasome subunit beta type-5	3	1	PSMB5; 20S proteasome subunit beta 5 [EC:3.4.25.1]
CSA035141.1	histone H4-like	5	1
CSA001234.1	diphosphomevalonate decarboxylase MVD2-like	3	2	MVD; diphosphomevalonate decarboxylase [EC:4.1.1.33]
CSA023915.1	60S ribosomal protein L11	1	2	RP-L11e; large subunit ribosomal protein L11e
CSA007370.1	probable fructokinase-4 isoform X2	4	1	E2.7.1.4; fructokinase [EC:2.7.1.4]
CSA004015.1	brefeldin A-inhibited guanine nucleotide-exchange protein 2	2	1	ARFGEF; brefeldin A-inhibited guanine nucleotide-exchange protein
CSA031824.1	uncharacterized protein LOC100244876	1	2
CSA019411.1	nodal modulator 1	1	3
CSA022929.1	60S ribosomal protein L7a-1-like	8	3	RP-L7Ae; large subunit ribosomal protein L7Ae
CSA008160.1	uncharacterized protein OsI_027940 isoform X2	4	1
CSA024339.1	elongation factor Tu, mitochondrial	3	3
CSA026213.1	spermatogenesis-associated protein 20 isoform X1	1	2
CSA020775.1	uncharacterized oxidoreductase At4g09670-like	1	2
CSA010476.1	primary amine oxidase-like	2	1	AOC3; primary-amine oxidase [EC:1.4.3.21]
CSA008487.1	probable methionine--tRNA ligase	1	2
CSA027067.1	dynein light chain 1, cytoplasmic	1	4
CSA000023.1	plasminogen activator inhibitor 1 RNA-binding protein-like	1	2
CSA002530.1	U3 small nucleolar RNA-associated protein 25	2	2
CSA034289.1	plasminogen activator inhibitor 1 RNA-binding protein	2	2
CSA026255.1	beta-adaptin-like protein C	2	1
CSA003801.1	nucleoside diphosphate kinase 3-like	2	2	ndk; nucleoside-diphosphate kinase [EC:2.7.4.6]
CSA001325.1	argininosuccinate synthase, chloroplastic isoform X1	3	3	argG; argininosuccinate synthase [EC:6.3.4.5]
CSA028417.1	dihydrolipoyllysine-residue succinyltransferase component of 2-oxoglutarate dehydrogenase complex 2, mitochondrial-like	2	3	DLST; 2-oxoglutarate dehydrogenase E2 component (dihydrolipoamide succinyltransferase) [EC:2.3.1.61]
CSA006145.1	uncharacterized protein LOC107434073	2	1
CSA032366.1	60S ribosomal protein L28-2-like	6	1	RP-L28e; large subunit ribosomal protein L28e
CSA035808.1	coatomer subunit gamma-2	3	1
CSA013179.1	uncharacterized protein LOC105177775	3	1
CSA026954.1	uncharacterized protein LOC109161438	2	3
CSA021143.1	apoptotic chromatin condensation inducer in the nucleus-like isoform X1	2	3	ACIN1; apoptotic chromatin condensation inducer in the nucleus
CSA024512.1	40S ribosomal protein S17-4-like	3	1	RP-S17e; small subunit ribosomal protein S17e
CSA018288.1	2-Cys peroxiredoxin BAS1, chloroplastic	3	3
CSA015454.1	40S ribosomal protein S4-3 isoform X1	4	1	RP-S4e; small subunit ribosomal protein S4e
CSA028548.1	succinyl-CoA ligase	2	1	LSC1; succinyl-CoA synthetase alpha subunit [EC:6.2.1.4 6.2.1.5]
CSA024935.1	pyruvate kinase, cytosolic isozyme	4	3	PK; pyruvate kinase [EC:2.7.1.40]
CSA020889.1	40S ribosomal protein S15	2	1	RP-S15e; small subunit ribosomal protein S15e
CSA019497.1	uncharacterized protein LOC109001808	4	1
CSA028001.1	elongation factor 1-beta-like	4	4
CSA033184.1	KH domain-containing protein At4g18375-like isoform X1	2	1
CSA002466.1	2-hydroxyacyl-CoA lyase	1	2	HACL1; 2-hydroxyacyl-CoA lyase 1 [EC:4.1.-.-]
CSA035110.1	T-complex protein 1 subunit beta	4	3
CSA012433.1	uncharacterized protein LOC100248360	2	1
CSA015502.1	26S proteasome non-ATPase regulatory subunit 14 homolog	3	1
CSA023182.1	ribosome-binding factor PSRP1, chloroplastic	2	1
CSA021008.1	T-complex protein 1 subunit gamma	2	1
CSA021873.1	glutamate--tRNA ligase, cytoplasmic isoform X1	1	2	EARS; glutamyl-tRNA synthetase [EC:6.1.1.17]
CSA029082.1	threonine--tRNA ligase, mitochondrial 1-like	1	2	TARS; threonyl-tRNA synthetase [EC:6.1.1.3]
CSA007452.1	altered inheritance of mitochondria protein 32-like	2	1
CSA010390.1	haloacid dehalogenase-like hydrolase domain-containing protein 3	1	3
CSA021564.1	acetyl-CoA acetyltransferase, cytosolic 1 isoform X1	1	2	E2.3.1.9; acetyl-CoA C-acetyltransferase [EC:2.3.1.9]
CSA001815.1	acetyl-CoA acetyltransferase, cytosolic 1-like	2	1	E2.3.1.9; acetyl-CoA C-acetyltransferase [EC:2.3.1.9]
CSA001818.1	indole-3-glycerol phosphate synthase, chloroplastic	4	1	trpC; indole-3-glycerol phosphate synthase [EC:4.1.1.48]
CSA018939.1	importin subunit beta-1	1	2	KPNB1; importin subunit beta-1
CSA031574.1	trigger factor-like protein TIG, Chloroplastic	3	3
CSA030236.1	anthranilate synthase beta subunit 1, chloroplastic-like	2	1	trpG; anthranilate synthase component II [EC:4.1.3.27]
CSA017616.1	malate dehydrogenase	3	1	E1.1.1.82; malate dehydrogenase (NADP+) [EC:1.1.1.82]
CSA036160.1	uncharacterized protein LOC100527647	1	2	RP-S19e; small subunit ribosomal protein S19e
CSA002354.1	uncharacterized protein LOC109244961	1	2
CSA026708.1	phosphoglycerate mutase-like protein 1	1	2
CSA019662.1	phosphoglycerate mutase-like protein 1 isoform X1	2	1
CSA032333.1	2-oxoglutarate dehydrogenase, mitochondrial	1	3	OGDH; 2-oxoglutarate dehydrogenase E1 component [EC:1.2.4.2]
CSA033885.1	3-dehydroquinate synthase, chloroplastic	5	1	aroB; 3-dehydroquinate synthase [EC:4.2.3.4]
CSA007544.1	cell division cycle protein 48 homolog	2	2
CSA017806.1	dnaJ protein ERDJ3B-like	1	2	DNAJB11; DnaJ homolog subfamily B member 11
CSA000223.1	lysine--tRNA ligase-like	1	2
CSA029704.1	brefeldin A-inhibited guanine nucleotide-exchange protein 5	2	1
CSA011933.1	5-methyltetrahydropteroyltriglutamate--homocysteine methyltransferase	1	3	metE; 5-methyltetrahydropteroyltriglutamate--homocysteine methyltransferase [EC:2.1.1.14]
CSA026696.1	5-methyltetrahydropteroyltriglutamate--homocysteine methyltransferase-like	7	7	metE; 5-methyltetrahydropteroyltriglutamate--homocysteine methyltransferase [EC:2.1.1.14]
CSA028806.1	ATP synthase subunit gamma, mitochondrial	5	1	ATPeF1G; F-type H+-transporting ATPase subunit gamma
CSA001404.1	ATP synthase gamma chain, chloroplastic	3	2	ATPF1G; F-type H+-transporting ATPase subunit gamma
CSA029276.1	ATP synthase gamma chain, chloroplastic	3	1	ATPF1G; F-type H+-transporting ATPase subunit gamma
CSA032350.1	ATP synthase subunit d, mitochondrial	2	2	ATPeF0D; F-type H+-transporting ATPase subunit d
CSA000036.1	pyrophosphate-energized vacuolar membrane proton pump-like	1	2	ppa; inorganic pyrophosphatase [EC:3.6.1.1]
CSA016128.1	pyrophosphate-energized vacuolar membrane proton pump	1	2	ppa; inorganic pyrophosphatase [EC:3.6.1.1]
CSA011215.1	60S ribosomal protein L13-1	3	2	RP-L13e; large subunit ribosomal protein L13e
CSA002629.1	branched-chain-amino-acid aminotransferase 3, chloroplastic	3	2	E2.6.1.42; branched-chain amino acid aminotransferase [EC:2.6.1.42]
CSA004504.1	beta-glucosidase 44-like	2	1	bglB; beta-glucosidase [EC:3.2.1.21]
CSA030367.1	luminal-binding protein 5	2	1	HSPA5; heat shock 70kDa protein 5
CSA032793.1	luminal-binding protein 5	10	12	HSPA5; heat shock 70kDa protein 5
CSA021703.1	protein BOBBER 1	3	1
CSA003234.1	transcription factor BTF3 homolog 4	1	2
CSA013341.1	carbonic anhydrase 2-like	1	2	cynT; carbonic anhydrase [EC:4.2.1.1]
CSA002108.1	carbonic anhydrase 2 isoform X1	6	2	cynT; carbonic anhydrase [EC:4.2.1.1]
CSA030476.1	chlorophyll a-b binding protein of LHCII type 1-like	2	1	LHCB1; light-harvesting complex II chlorophyll a/b binding protein 1
CSA029877.1	calmodulin-7 isoform X1	1	3	CALM; calmodulin
CSA034202.1	carbamoyl-phosphate synthase large chain, chloroplastic	2	1
CSA035408.1	catalase isozyme 1	3	2	katE; catalase [EC:1.11.1.6]
CSA006637.1	cytochrome b5-like isoform X1	2	1
CSA011778.1	CBS domain-containing protein CBSX3, mitochondrial	1	2
CSA026735.1	probable chalcone--flavonone isomerase 3	1	2
CSA036554.1	isocitrate dehydrogenase family protein	4	5	IDH1; isocitrate dehydrogenase [EC:1.1.1.42]
CSA034816.1	chaperone protein ClpB3, chloroplastic isoform X2	4	5
CSA016043.1	ATP-dependent Clp protease ATP-binding subunit ClpA homolog CD4B, chloroplastic-like	7	6	clpC; ATP-dependent Clp protease ATP-binding subunit ClpC
CSA000242.1	malate dehydrogenase	3	2	MDH1; malate dehydrogenase [EC:1.1.1.37]
CSA008510.1	calnexin homolog 1-like	2	5	CANX; calnexin
CSA019161.1	calnexin homolog 1-like	7	1	CANX; calnexin
CSA026073.1	stromal 70 kDa heat shock-related protein, chloroplastic	12	8	HSPA1_8; heat shock 70kDa protein 1/8
CSA000531.1	20 kDa chaperonin, chloroplastic-like	4	4
CSA010446.1	ruBisCO large subunit-binding protein subunit alpha	2	3
CSA008945.1	ruBisCO large subunit-binding protein subunit beta, chloroplastic	2	7	groEL; chaperonin GroEL
CSA036590.1	ruBisCO large subunit-binding protein subunit beta, chloroplastic	7	2	groEL; chaperonin GroEL
CSA000101.1	signal recognition particle 54 kDa protein, chloroplastic	1	2	SRP54; signal recognition particle subunit SRP54 [EC:3.6.5.4]
CSA001864.1	heat shock protein 90-5, chloroplastic	7	5	HSP90B; heat shock protein 90kDa beta
CSA025224.1	chloroplast stem-loop binding protein of 41 kDa b, chloroplastic isoform X2	6	3
CSA016538.1	magnesium-protoporphyrin IX monomethyl ester	1	2	E1.14.13.81; magnesium-protoporphyrin IX monomethyl ester (oxidative) cyclase [EC:1.14.13.81]
CSA018083.1	calreticulin-3-like	1	2	CALR; calreticulin
CSA009600.1	citrate synthase, glyoxysomal	2	2	CS; citrate synthase [EC:2.3.3.1]
CSA028726.1	cytochrome P450 704C1 isoform X2	3	2
CSA009375.1	cysteine proteinase inhibitor-like	1	3
CSA009564.1	zinc finger BED domain-containing protein DAYSLEEPER-like	1	2
CSA021087.1	phospho-2-dehydro-3-deoxyheptonate aldolase 2, chloroplastic	1	3	E2.5.1.54; 3-deoxy-7-phosphoheptulonate synthase [EC:2.5.1.54]
CSA018789.1	dynamin-2A-like	2	1	DNM; dynamin GTPase [EC:3.6.5.5]
CSA001425.1	delta(24)-sterol reductase	1	2	DHCR24; Delta24-sterol reductase [EC:1.3.1.72 1.3.1.-]
CSA017090.1	probable zinc metallopeptidase EGY3, chloroplastic isoform X1	2	2
CSA033748.1	eukaryotic translation initiation factor 3 subunit A	6	3	EIF3A; translation initiation factor 3 subunit A
CSA010083.1	eukaryotic initiation factor 4A-2	4	3	EIF4A; translation initiation factor 4A
CSA011064.1	eukaryotic initiation factor 4A-3	1	2	EIF4A3; ATP-dependent RNA helicase [EC:3.6.4.13]
CSA019733.1	eukaryotic translation initiation factor 4G isoform X2	1	3	EIF4G; translation initiation factor 4G
CSA034355.1	eukaryotic translation initiation factor	3	1	EIF4G; translation initiation factor 4G
CSA028345.1	arginine--tRNA ligase, cytoplasmic-like isoform X1	5	2	RARS; arginyl-tRNA synthetase [EC:6.1.1.19]
CSA035036.1	chorismate synthase 1, chloroplastic-like	3	2
CSA009388.1	NADH dehydrogenase	2	1	NDUFS1; NADH dehydrogenase (ubiquinone) Fe-S protein 1 [EC:1.6.5.3 1.6.99.3]
CSA012836.1	60S ribosomal protein L3	5	4	RP-L3e; large subunit ribosomal protein L3e
CSA007724.1	titin-like isoform X1	3	2
CSA008978.1	N-alpha-acetyltransferase 15, NatA auxiliary subunit-like	4	3
CSA024785.1	uncharacterized protein LOC109005947	2	1
CSA017990.1	40S ribosomal protein S6	2	1	RP-S6e; small subunit ribosomal protein S6e
CSA030406.1	50S ribosomal protein L1, chloroplastic	3	1	RP-L1; large subunit ribosomal protein L1
CSA030143.1	nuclear pore complex protein NUP205 isoform X1	2	1	NUP205; nuclear pore complex protein Nup205
CSA008400.1	uncharacterized protein LOC100245074 isoform X1	2	1	fabD; [acyl-carrier-protein] S-malonyltransferase [EC:2.3.1.39]
CSA032534.1	endochitinase PR4	1	2	E3.2.1.14; chitinase [EC:3.2.1.14]
CSA003431.1	fatty-acid-binding protein 1	3	1
CSA009966.1	fructose-bisphosphate aldolase 1, chloroplastic	5	1	ALDO; fructose-bisphosphate aldolase, class I [EC:4.1.2.13]
CSA005116.1	fructose-bisphosphate aldolase, cytoplasmic isozyme 1	3	2	ALDO; fructose-bisphosphate aldolase, class I [EC:4.1.2.13]
CSA035207.1	fructose-bisphosphate aldolase cytoplasmic isozyme	4	3	ALDO; fructose-bisphosphate aldolase, class I [EC:4.1.2.13]
CSA030111.1	fructose-1,6-bisphosphatase, cytosolic	2	1	FBP; fructose-1,6-bisphosphatase I [EC:3.1.3.11]
CSA016186.1	formate dehydrogenase, mitochondrial	2	4	FDH; formate dehydrogenase [EC:1.2.1.2]
CSA003432.1	mediator of RNA polymerase II transcription subunit 36a-like	4	1	NOP1; rRNA 2'-O-methyltransferase fibrillarin [EC:2.1.1.-]
CSA016706.1	FK506-binding protein 2	2	1
CSA003707.1	flavonol synthase/flavanone 3-hydroxylase-like	3	2	FLS; flavonol synthase [EC:1.14.11.23]
CSA016736.1	ferredoxin--NADP reductase, leaf isozyme, chloroplastic	3	2
CSA006340.1	glucose-6-phosphate 1-dehydrogenase 1, chloroplastic	1	2	G6PD; glucose-6-phosphate 1-dehydrogenase [EC:1.1.1.49 1.1.1.363]
CSA025312.1	glutamate decarboxylase 1	2	1
CSA016057.1	galactokinase	2	1
CSA029280.1	galactokinase-like	3	1
CSA026796.1	glyceraldehyde-3-phosphate dehydrogenase A, chloroplastic	5	5	GAPA; glyceraldehyde-3-phosphate dehydrogenase (NADP+) (phosphorylating) [EC:1.2.1.13]
CSA018950.1	glyceraldehyde-3-phosphate dehydrogenase B, chloroplastic	3	4	GAPA; glyceraldehyde-3-phosphate dehydrogenase (NADP+) (phosphorylating) [EC:1.2.1.13]
CSA016761.1	glyceraldehyde-3-phosphate dehydrogenase, cytosolic	2	1	GAPDH; glyceraldehyde 3-phosphate dehydrogenase [EC:1.2.1.12]
CSA011668.1	glyceraldehyde-3-phosphate dehydrogenase, cytosolic-like	5	3
CSA017698.1	guanosine nucleotide diphosphate dissociation inhibitor 2 isoform X2	3	1
CSA008341.1	L-galactono-1,4-lactone dehydrogenase, mitochondrial	2	2	GLDH; L-galactono-1,4-lactone dehydrogenase [EC:1.3.2.3]
CSA020117.1	glycine dehydrogenase (decarboxylating), mitochondrial	10	1	GLDC; glycine dehydrogenase [EC:1.4.4.2]
CSA001445.1	GDSL esterase/lipase 1-like	4	1
CSA006044.1	glutamine synthetase nodule isozyme	2	1	glnA; glutamine synthetase [EC:6.3.1.2]
CSA010785.1	glutamine synthetase cytosolic isozyme 1	3	3	glnA; glutamine synthetase [EC:6.3.1.2]
CSA029477.1	glutamate synthase 1	2	1	GLT1; glutamate synthase (NADPH/NADH) [EC:1.4.1.13 1.4.1.14]
CSA003654.1	ferredoxin-dependent glutamate synthase, chloroplastic	7	1	E1.4.7.1; glutamate synthase (ferredoxin) [EC:1.4.7.1]
CSA005059.1	putative lactoylglutathione lyase isoform X2	4	1	GLO1; lactoylglutathione lyase [EC:4.4.1.5]
CSA025186.1	glyoxylate/succinic semialdehyde reductase 1	2	1	GLYR; glyoxylate/succinic semialdehyde reductase [EC:1.1.1.79 1.1.1.-]
CSA013702.1	probable phospholipid hydroperoxide glutathione peroxidase isoform X1	2	3	gpx; glutathione peroxidase [EC:1.11.1.9]
CSA013844.1	glutathione reductase, chloroplastic	2	1	GSR; glutathione reductase (NADPH) [EC:1.8.1.7]
CSA019899.1	14-3-3 protein 7	2	3
CSA001114.1	glutamine synthetase leaf isozyme, chloroplastic	3	4	glnA; glutamine synthetase [EC:6.3.1.2]
CSA018092.1	glutamate-1-semialdehyde 2,1-aminomutase 2, chloroplastic	4	2	hemL; glutamate-1-semialdehyde 2,1-aminomutase [EC:5.4.3.8]
CSA015390.1	glutathione S-transferase-like	2	1	GST; glutathione S-transferase [EC:2.5.1.18]
CSA013701.1	glutathione S-transferase T1	3	1	GST; glutathione S-transferase [EC:2.5.1.18]
CSA006423.1	probable glutathione S-transferase	4	3	GST; glutathione S-transferase [EC:2.5.1.18]
CSA022781.1	DNA gyrase subunit A, chloroplastic/mitochondrial	2	1
CSA023676.1	DNA gyrase subunit B, chloroplastic/mitochondrial	3	1
CSA031781.1	adenosylhomocysteinase	8	5	E3.3.1.1; adenosylhomocysteinase [EC:3.3.1.1]
CSA013503.1	histone H1	10	2
CSA025498.1	hsp70-Hsp90 organizing protein 3-like	3	6
CSA033796.1	hsp70-Hsp90 organizing protein 3-like	9	9
CSA022952.1	glycerate dehydrogenase	3	1	HPR1; hydroxypyruvate reductase 1
CSA016462.1	heat shock cognate 70 kDa protein 2	2	2	HSPA1_8; heat shock 70kDa protein 1/8
CSA009227.1	heat shock cognate 70 kDa protein 2-like	5	11	HSPA1_8; heat shock 70kDa protein 1/8
CSA000306.1	heat shock cognate 70 kDa protein 2-like	13	4	HSPA1_8; heat shock 70kDa protein 1/8
CSA010324.1	chaperone protein ClpB1	9	5
CSA001448.1	small heat shock protein, chloroplastic-like isoform X2	1	4	HSP20; HSP20 family protein
CSA006518.1	chaperonin CPN60-2, mitochondrial	3	3	groEL; chaperonin GroEL
CSA002537.1	chaperonin CPN60-2, mitochondrial-like	7	4	groEL; chaperonin GroEL
CSA000963.1	heat shock cognate 70 kDa protein 2-like	4	4	HSPA1_8; heat shock 70kDa protein 1/8
CSA010005.1	heat shock 70 kDa protein 14-like	2	3
CSA013547.1	heat shock cognate protein 80	4	3	HSP90A; molecular chaperone HtpG
CSA013811.1	heat shock cognate protein 80	15	10	HSP90A; molecular chaperone HtpG
CSA026186.1	heat shock protein 90-6, mitochondrial-like	4	1	HSP90B; heat shock protein 90kDa beta
CSA030713.1	heat shock protein 83	5	7
CSA011619.1	heat shock 70 kDa protein 14-like	6	6
CSA022844.1	probable histone H2B.1	12	4
CSA011175.1	isocitrate dehydrogenase	4	1	IDH3; isocitrate dehydrogenase (NAD+) [EC:1.1.1.41]
CSA023535.1	3-isopropylmalate dehydrogenase, chloroplastic-like	2	1	IDH3; isocitrate dehydrogenase (NAD+) [EC:1.1.1.41]
CSA020735.1	protein INVOLVED IN DE NOVO 2	1	2
CSA018562.1	3-isopropylmalate dehydrogenase, chloroplastic-like	3	2	leuB; 3-isopropylmalate dehydrogenase [EC:1.1.1.85]
CSA033261.1	2,3-bisphosphoglycerate-independent phosphoglycerate mutase	5	5
CSA033804.1	dnaJ protein homolog 2 isoform X2	2	4	DNAJA2; DnaJ homolog subfamily A member 2
CSA035286.1	probable voltage-gated potassium channel subunit beta	3	1
CSA032609.1	3-oxoacyl-[acyl-carrier-protein] synthase I, chloroplastic	2	2
CSA002572.1	long chain acyl-CoA synthetase 2	2	1	ACSL; long-chain acyl-CoA synthetase [EC:6.2.1.3]
CSA028920.1	long chain acyl-CoA synthetase 4	2	2	ACSL; long-chain acyl-CoA synthetase [EC:6.2.1.3]
CSA024064.1	chlorophyll a-b binding protein 6A, chloroplastic	1	5	LHCA1; light-harvesting complex I chlorophyll a/b binding protein 1
CSA010862.1	chlorophyll a-b binding protein CP29.1, chloroplastic	3	2	LHCB4; light-harvesting complex II chlorophyll a/b binding protein 4
CSA014653.1	chlorophyll a-b binding protein CP29.1, chloroplastic	3	2	LHCB4; light-harvesting complex II chlorophyll a/b binding protein 4
CSA004532.1	chlorophyll a-b binding protein CP26, chloroplastic	2	2	LHCB5; light-harvesting complex II chlorophyll a/b binding protein 5
CSA015743.1	elongation factor 2	4	4
CSA011928.1	elongation factor 2	15	1
CSA002712.1	enolase	2	3	ENO; enolase [EC:4.2.1.11]
CSA034381.1	enolase	3	2	ENO; enolase [EC:4.2.1.11]
CSA027399.1	DEAD-box ATP-dependent RNA helicase 38	2	1
CSA019962.1	probable linoleate 9S-lipoxygenase 5 isoform X1	2	3	LOX1_5; linoleate 9S-lipoxygenase [EC:1.13.11.58]
CSA003060.1	linoleate 13S-lipoxygenase 2-1, chloroplastic-like	4	3	LOX2S; lipoxygenase [EC:1.13.11.12]
CSA012667.1	linoleate 13S-lipoxygenase 2-1, chloroplastic-like	4	3	LOX2S; lipoxygenase [EC:1.13.11.12]
CSA022360.1	methyl-CpG-binding domain-containing protein 11 isoform X1	2	7
CSA001169.1	multiprotein-bridging factor 1b	1	2
CSA021472.1	multiprotein-bridging factor 1b	1	2
CSA025833.1	metacaspase-5-like	1	2
CSA011124.1	DNA replication licensing factor MCM5	3	1	MCM5; DNA replication licensing factor MCM5 [EC:3.6.4.12]
CSA025951.1	DNA replication licensing factor MCM6	2	1	MCM6; DNA replication licensing factor MCM6 [EC:3.6.4.12]
CSA027795.1	monodehydroascorbate reductase isoform X1	2	3	E1.6.5.4; monodehydroascorbate reductase (NADH) [EC:1.6.5.4]
CSA011234.1	malate dehydrogenase, chloroplastic	2	1
CSA031784.1	bifunctional 3-dehydroquinate dehydratase/shikimate dehydrogenase, chloroplastic	1	3	aroDE; 3-dehydroquinate dehydratase / shikimate dehydrogenase [EC:4.2.1.10 1.1.1.25]
CSA028053.1	bifunctional 3-dehydroquinate dehydratase/shikimate dehydrogenase, chloroplastic-like isoform X1	2	1	aroDE; 3-dehydroquinate dehydratase / shikimate dehydrogenase [EC:4.2.1.10 1.1.1.25]
CSA022721.1	ATP sulfurylase 2	3	2
CSA017891.1	glyoxysomal fatty acid beta-oxidation multifunctional protein MFP-a	4	5	MFP2; enoyl-CoA hydratase/3-hydroxyacyl-CoA dehydrogenase [EC:4.2.1.17 1.1.1.35 1.1.1.211]
CSA023554.1	MALE GAMETOPHYTE DEFECTIVE 1	4	4
CSA023397.1	MLP-like protein 423	2	1
CSA034775.1	malate dehydrogenase, mitochondrial-like	3	2	MDH2; malate dehydrogenase [EC:1.1.1.37]
CSA009913.1	probable mitochondrial-processing peptidase subunit beta, mitochondrial	2	2
CSA036376.1	uncharacterized protein At1g04910 isoform X1	2	1
CSA027456.1	heat shock 70 kDa protein, mitochondrial-like	2	1	HSPA1_8; heat shock 70kDa protein 1/8
CSA012537.1	heat shock 70 kDa protein, mitochondrial-like	5	4	HSPA1_8; heat shock 70kDa protein 1/8
CSA010160.1	dihydrolipoyl dehydrogenase 1, mitochondrial	9	2	DLD; dihydrolipoamide dehydrogenase [EC:1.8.1.4]
CSA009186.1	S-adenosylmethionine synthase 2	2	1	metK; S-adenosylmethionine synthetase [EC:2.5.1.6]
CSA009521.1	GDP-mannose 4,6 dehydratase 1	1	2	gmd; GDPmannose 4,6-dehydratase [EC:4.2.1.47]
CSA030501.1	NAD-dependent malic enzyme 62 kDa isoform, mitochondrial	3	1	E1.1.1.39; malate dehydrogenase (decarboxylating) [EC:1.1.1.39]
CSA009025.1	NADP-dependent malic enzyme	3	1	E1.1.1.40; malate dehydrogenase (oxaloacetate-decarboxylating)(NADP+) [EC:1.1.1.40]
CSA009927.1	glycerol kinase-like	4	1
CSA036478.1	H/ACA ribonucleoprotein complex subunit 3-like protein	1	2	NOP10; H/ACA ribonucleoprotein complex subunit 3
CSA013374.1	photosystem II 22 kDa protein, chloroplastic	2	2	psbS; photosystem II 22kDa protein
CSA017432.1	vesicle-fusing ATPase-like	2	1
CSA007200.1	proline--tRNA ligase isoform X1	1	2
CSA031425.1	glutamine--tRNA ligase, cytoplasmic	1	3	QARS; glutaminyl-tRNA synthetase [EC:6.1.1.18]
CSA010586.1	5-oxoprolinase	1	2	OPLAH; 5-oxoprolinase (ATP-hydrolysing) [EC:3.5.2.9]
CSA015683.1	dnaJ protein P58IPK homolog	1	2	DNAJC3; DnaJ homolog subfamily C member 3
CSA015357.1	proteasome activator subunit 4	3	1	PSME4; proteasome activator subunit 4
CSA033283.1	polyadenylate-binding protein 2-like isoform X1	1	3
CSA021807.1	polyadenylate-binding protein 2-like	2	2	PABPC; polyadenylate-binding protein
CSA010393.1	proteasome subunit alpha type-4	2	1	PSMA4; 20S proteasome subunit alpha 3 [EC:3.4.25.1]
CSA006550.1	proteasome subunit alpha type-7	1	2	PSMA7; 20S proteasome subunit alpha 4 [EC:3.4.25.1]
CSA016076.1	phenylalanine ammonia-lyase	4	2	PAL; phenylalanine ammonia-lyase [EC:4.3.1.24]
CSA009759.1	ATP synthase subunit b', chloroplastic	2	1	ATPF0B; F-type H+-transporting ATPase subunit b
CSA011908.1	probable fructose-bisphosphate aldolase 3, chloroplastic	4	1	ALDO; fructose-bisphosphate aldolase, class I [EC:4.1.2.13]
CSA010369.1	protein disulfide-isomerase	1	4	PDIA1; protein disulfide-isomerase A1 [EC:5.3.4.1]
CSA009507.1	protein disulfide isomerase-like 1-6	1	2
CSA034878.1	Peroxisomal membrane protein 11C	2	1
CSA030565.1	ATP-dependent 6-phosphofructokinase 3-like isoform X1	2	2	pfkA; 6-phosphofructokinase 1 [EC:2.7.1.11]
CSA027766.1	glucose-6-phosphate isomerase 1, chloroplastic	1	2	GPI; glucose-6-phosphate isomerase [EC:5.3.1.9]
CSA031519.1	phosphoglycerate kinase, cytosolic	5	6	PGK; phosphoglycerate kinase [EC:2.7.2.3]
CSA002692.1	alpha-glucan phosphorylase, H isozyme	1	2	PYG; glycogen phosphorylase [EC:2.4.1.1]
CSA025924.1	mitochondrial phosphate carrier protein 3, mitochondrial	1	2
CSA026607.1	peptidyl-prolyl cis-trans isomerase Pin1	2	1
CSA035327.1	3-ketoacyl-CoA thiolase 2, peroxisomal	1	3
CSA028496.1	phospholipase D alpha 1	3	1	PLD1_2; phospholipase D1/2 [EC:3.1.4.4]
CSA004910.1	peroxisomal and mitochondrial division factor 2	1	3
CSA024261.1	pectinesterase	4	2	E3.1.1.11; pectinesterase [EC:3.1.1.11]
CSA021619.1	peptide methionine sulfoxide reductase A1	1	2
CSA028952.1	protochlorophyllide reductase	2	1
CSA012503.1	protochlorophyllide reductase, chloroplastic	3	1	por; protochlorophyllide reductase [EC:1.3.1.33]
CSA034412.1	protochlorophyllide reductase, chloroplastic	4	4	por; protochlorophyllide reductase [EC:1.3.1.33]
CSA015361.1	soluble inorganic pyrophosphatase 4	1	3	ppa; inorganic pyrophosphatase [EC:3.6.1.1]
CSA026365.1	phosphoenolpyruvate carboxylase, housekeeping isozyme-like	4	1	ppc; phosphoenolpyruvate carboxylase [EC:4.1.1.31]
CSA012486.1	proteasome subunit alpha type-2-B	1	2	PSMA2; 20S proteasome subunit alpha 2 [EC:3.4.25.1]
CSA018167.1	presequence protease 1, chloroplastic/mitochondrial-like isoform X1	7	6
CSA000795.1	phosphoribulokinase, chloroplastic-like	2	4	PRK; phosphoribulokinase [EC:2.7.1.19]
CSA027312.1	photosystem I reaction center subunit IV A	2	2	psaE; photosystem I subunit IV
CSA033864.1	photosystem I reaction center subunit N, chloroplastic-like	4	1	psaN; photosystem I subunit PsaN
CSA005241.1	phosphoserine aminotransferase 2, chloroplastic	2	3	serC; phosphoserine aminotransferase [EC:2.6.1.52]
CSA017787.1	protein THYLAKOID FORMATION1, chloroplastic	1	2
CSA000627.1	oxygen-evolving enhancer protein 1, chloroplastic	5	3	psbO; photosystem II oxygen-evolving enhancer protein 1
CSA033259.1	oxygen-evolving enhancer protein 2, chloroplastic-like	3	3	psbP; photosystem II oxygen-evolving enhancer protein 2
CSA026004.1	oxygen-evolving enhancer protein 3-2, chloroplastic	2	4	psbQ; photosystem II oxygen-evolving enhancer protein 3
CSA035706.1	membrane-associated protein VIPP1, chloroplastic	3	2
CSA031683.1	probable phosphoribosylformylglycinamidine synthase, chloroplastic/mitochondrial	3	1	purL; phosphoribosylformylglycinamidine synthase [EC:6.3.5.3]
CSA020605.1	ribulose bisphosphate carboxylase large chain (chloroplast)	3	2	rbcL; ribulose-bisphosphate carboxylase large chain [EC:4.1.1.39]
CSA036938.1	ribulose-1 (chloroplast)	7	6	rbcL; ribulose-bisphosphate carboxylase large chain [EC:4.1.1.39]
CSA004763.1	ribulose bisphosphate carboxylase small chain, chloroplastic-like	4	6	rbcS; ribulose-bisphosphate carboxylase small chain [EC:4.1.1.39]
CSA020587.1	ribulose bisphosphate carboxylase small chain, chloroplastic isoform X1	1	4	rbcS; ribulose-bisphosphate carboxylase small chain [EC:4.1.1.39]
CSA003658.1	ribulose bisphosphate carboxylase/oxygenase activase, chloroplastic isoform X1	2	1
CSA003662.1	ribulose bisphosphate carboxylase/oxygenase activase, chloroplastic isoform X2	5	4
CSA001619.1	trifunctional UDP-glucose 4,6-dehydratase/UDP-4-keto-6-deoxy-D-glucose 3,5-epimerase/UDP-4-keto-L-rhamnose-reductase RHM1	5	4	RHM; UDP-glucose 4,6-dehydratase [EC:4.2.1.76]
CSA027066.1	DnaJ homolog subfamily C member 2	2	1
CSA002335.1	uncharacterized protein LOC102623101	4	1
CSA002602.1	peptidyl-prolyl cis-trans isomerase	4	1
CSA017664.1	peptidyl-prolyl cis-trans isomerase CYP19-4	2	2
CSA023685.1	peptidyl-prolyl cis-trans isomerase FKBP62	2	3
CSA016705.1	peptidyl-prolyl cis-trans isomerase FKBP62	8	6
CSA000480.1	50S ribosomal protein L12, chloroplastic	1	3	RP-L7; large subunit ribosomal protein L7/L12
CSA012942.1	60S ribosomal protein L18-2-like	2	1	RP-L18e; large subunit ribosomal protein L18e
CSA025687.1	60S ribosomal protein L23a	7	1	RP-L23Ae; large subunit ribosomal protein L23Ae
CSA001061.1	60S ribosomal protein L24-like	5	1	RP-L24e; large subunit ribosomal protein L24e
CSA021951.1	30S ribosomal protein S1, chloroplastic	1	2	RP-S1; small subunit ribosomal protein S1
CSA036462.1	40S ribosomal protein S13-like	2	2	RP-S13e; small subunit ribosomal protein S13e
CSA010009.1	ribosomal protein S17	2	2	RP-S17; small subunit ribosomal protein S17
CSA008504.1	40S ribosomal protein S5	2	3	RP-S5e; small subunit ribosomal protein S5e
CSA029580.1	26S protease regulatory subunit 7 homolog A isoform X2	2	1	PSMC2; 26S proteasome regulatory subunit T1
CSA034409.1	26S proteasome regulatory subunit 4 homolog B	1	2	PSMC1; 26S proteasome regulatory subunit T2
CSA018358.1	26S protease regulatory subunit 6B homolog	3	4	PSMC4; 26S proteasome regulatory subunit T3
CSA028166.1	26S protease regulatory subunit 6A homolog	2	4	PSMC3; 26S proteasome regulatory subunit T5
CSA032813.1	ribosome-recycling factor, chloroplastic	3	2
CSA000602.1	probable pyridoxal 5'-phosphate synthase subunit PDX1	1	2
CSA004426.1	adenosylhomocysteinase	1	2	E3.3.1.1; adenosylhomocysteinase [EC:3.3.1.1]
CSA005033.1	S-adenosylmethionine synthase 2	8	3	metK; S-adenosylmethionine synthetase [EC:2.5.1.6]
CSA030059.1	splicing factor 3B subunit 3	3	1	SF3B3; splicing factor 3B subunit 3
CSA030487.1	GTP-binding protein SAR1A	1	2	SAR1; GTP-binding protein SAR1 [EC:3.6.5.-]
CSA026274.1	succinate dehydrogenase subunit 5, mitochondrial	1	2
CSA020235.1	succinate dehydrogenase subunit 6, mitochondrial-like	2	1
CSA024647.1	protein SIEVE ELEMENT OCCLUSION B-like	3	2
CSA032743.1	protein SGT1 homolog A-like	1	2	SUGT1; suppressor of G2 allele of SKP1
CSA013744.1	serine hydroxymethyltransferase 3, chloroplastic-like	4	1
CSA002938.1	sulfite reductase	4	2	sir; sulfite reductase (ferredoxin) [EC:1.8.7.1]
CSA022953.1	SKP1-like protein 1A isoform X1	3	2	SKP1; S-phase kinase-associated protein 1
CSA011006.1	Serine/threonine-protein kinase SAPK2	7	4	SNRK2; serine/threonine-protein kinase SRK2 [EC:2.7.11.1]
CSA009469.1	squalene synthase	2	1	FDFT1; farnesyl-diphosphate farnesyltransferase [EC:2.5.1.21]
CSA000649.1	stachyose synthase-like	1	2	E2.4.1.67; stachyose synthetase [EC:2.4.1.67]
CSA029952.1	SUN domain-containing protein 3-like	1	3
CSA000011.1	sucrose synthase	6	6	E2.4.1.13; sucrose synthase [EC:2.4.1.13]
CSA022874.1	histone-lysine N-methyltransferase, H3 lysine-9 specific SUVH1	2	1	EHMT; euchromatic histone-lysine N-methyltransferase [EC:2.1.1.43]
CSA017800.1	pentatricopeptide repeat-containing protein At4g16390, chloroplastic	2	1
CSA021635.1	asparagine--tRNA ligase, cytoplasmic 1	3	2	NARS; asparaginyl-tRNA synthetase [EC:6.1.1.22]
CSA030953.1	protein TPR2-like isoform X2	2	3
CSA035465.1	T-complex protein 1 subunit alpha	4	1
CSA023573.1	translationally-controlled tumor protein homolog	2	2
CSA036415.1	translationally-controlled tumor protein homolog	4	3
CSA016983.1	protein TIC110, chloroplastic isoform X1	1	3
CSA019776.1	eukaryotic translation initiation factor 3 subunit B	1	3	EIF3B; translation initiation factor 3 subunit B
CSA036209.1	apolipoprotein D	2	1
CSA003118.1	triosephosphate isomerase, chloroplastic	4	2	TPI; triosephosphate isomerase (TIM) [EC:5.3.1.1]
CSA007672.1	mitochondrial import inner membrane translocase subunit Tim9	2	1
CSA028530.1	translocase of chloroplast 34, chloroplastic isoform X2	3	2
CSA019750.1	triosephosphate isomerase, cytosolic	1	3	TPI; triosephosphate isomerase (TIM) [EC:5.3.1.1]
CSA000657.1	thioredoxin H-type	1	2
CSA029775.1	chalcone synthase 1	1	2
CSA031792.1	flavonoid 3',5'-hydroxylase 2-like	1	2
CSA019160.1	staphylococcal nuclease domain-containing protein 1	7	1
CSA019726.1	valine--tRNA ligase, mitochondrial 1 isoform X2	4	3	VARS; valyl-tRNA synthetase [EC:6.1.1.9]
CSA021931.1	uncharacterized protein LOC100245159	2	1
CSA021114.1	ubiquitin-activating enzyme E1 1-like	3	3
CSA002798.1	UBP1-associated protein 2A	2	2	HNRNPA1_3; heterogeneous nuclear ribonucleoprotein A1/A3
CSA005296.1	ubiquitin carboxyl-terminal hydrolase 12 isoform X1	3	2
CSA010797.1	UDP-glucose 6-dehydrogenase 1	6	1	UGDH; UDPglucose 6-dehydrogenase [EC:1.1.1.22]
CSA035914.1	UDP-glucose 4-epimerase GEPI48	2	1	galE; UDP-glucose 4-epimerase [EC:5.1.3.2]
CSA029743.1	UTP--glucose-1-phosphate uridylyltransferase	4	1	UGP2; UTP--glucose-1-phosphate uridylyltransferase [EC:2.7.7.9]
CSA004129.1	UDP-glycosyltransferase 73C2	1	2
CSA013417.1	probable protein disulfide-isomerase A6	6	5	PDIA6; protein disulfide-isomerase A6 [EC:5.3.4.1]
CSA032553.1	UDP-sugar pyrophosphorylase	3	1	USP; UDP-sugar pyrophosphorylase [EC:2.7.7.64]
CSA031127.1	UDP-glucuronic acid decarboxylase 6	2	1	UXS1; UDP-glucuronate decarboxylase [EC:4.1.1.35]
CSA004719.1	V-type proton ATPase subunit B 2 isoform X2	2	1
CSA036455.1	ATP-dependent zinc metalloprotease FTSH 2, chloroplastic	1	2
CSA028037.1	mitochondrial outer membrane protein porin of 36 kDa	3	2
CSA001820.1	mitochondrial outer membrane protein porin of 34 kDa	4	2
CSA028643.1	mitochondrial outer membrane protein porin 2-like	1	2
CSA024149.1	mitochondrial outer membrane protein porin of 34 kDa	1	2
CSA034575.1	villin-3-like isoform X1	2	1
CSA009867.1	inositol-phosphate phosphatase-like	2	1	VTC4; inositol-phosphate phosphatase / L-galactose 1-phosphate phosphatase [EC:3.1.3.25 3.1.3.93]
CSA009157.1	phosphomethylethanolamine N-methyltransferase	3	2	E2.1.1.103; phosphoethanolamine N-methyltransferase [EC:2.1.1.103]
CSA012350.1	protein EXPORTIN 1A	3	1	XPO1; exportin-1
CSA017522.1	alpha-xylosidase 1-like	2	2
CSA036589.1	uncharacterized protein LOC107415058	2	2
CSA000042.1	glucan endo-1,3-beta-glucosidase 14 isoform X2	1	1
CSA000391.1	60S ribosomal protein L17-2	1	1	RP-L17e; large subunit ribosomal protein L17e
CSA000407.1	elongation factor 1-delta-like	1	1
CSA000838.1	protein mago nashi homolog	1	1	MAGOH; protein mago nashi
CSA001004.1	uncharacterized protein LOC109182857	1	1
CSA001297.1	uncharacterized protein LOC107839337	1	1
CSA001786.1	3-oxoacyl-[acyl-carrier-protein] reductase 4 isoform X2	1	1	fabG; 3-oxoacyl-[acyl-carrier protein] reductase [EC:1.1.1.100]
CSA001833.1	glyceraldehyde-3-phosphate dehydrogenase, cytosolic-like	1	1	GAPDH; glyceraldehyde 3-phosphate dehydrogenase [EC:1.2.1.12]
CSA002209.1	LYR motif-containing protein 4	1	1
CSA002298.1	pre-mRNA-processing factor 19	1	1	PRPF19; pre-mRNA-processing factor 19 [EC:2.3.2.27]
CSA002361.1	chlorophyll a-b binding protein 13, chloroplastic	1	1	LHCB3; light-harvesting complex II chlorophyll a/b binding protein 3
CSA002837.1	ATP-dependent Clp protease ATP-binding subunit CLPT2, chloroplastic	1	1
CSA003162.1	GRF1-INTERACTING FACTOR 2 family protein	1	1
CSA003213.1	thylakoid lumenal 29 kDa protein, chloroplastic	1	1	E1.11.1.11; L-ascorbate peroxidase [EC:1.11.1.11]
CSA003336.1	vesicle-associated membrane protein 725	1	1
CSA003339.1	subtilisin-like protease SBT2.5 isoform X3	1	1
CSA003473.1	4-coumarate--CoA ligase-like 7	1	1	4CL; 4-coumarate--CoA ligase [EC:6.2.1.12]
CSA003688.1	ferredoxin--NADP reductase, root isozyme, chloroplastic isoform X2	1	1	petH; ferredoxin--NADP+ reductase [EC:1.18.1.2]
CSA004027.1	vestitone reductase-like	1	1
CSA004048.1	far upstream element-binding protein 1 isoform X2	1	1
CSA004138.1	pyridoxine/pyridoxamine 5'-phosphate oxidase 1, chloroplastic	1	1	pdxH; pyridoxamine 5'-phosphate oxidase [EC:1.4.3.5]
CSA004254.1	uncharacterized protein LOC109008761	1	1
CSA004279.1	uncharacterized protein LOC103334007	1	1
CSA004989.1	hydroxyphenylpyruvate reductase-like	1	1	HPR2; hydroxypyruvate reductase 2
CSA005074.1	uncharacterized protein LOC100250971	1	1
CSA005140.1	3-phosphoshikimate 1-carboxyvinyltransferase 2	1	1	aroA; 3-phosphoshikimate 1-carboxyvinyltransferase [EC:2.5.1.19]
CSA005272.1	ATP synthase subunit epsilon, mitochondrial	1	1	ATPeF1E; F-type H+-transporting ATPase subunit epsilon
CSA005405.1	very-long-chain enoyl-CoA reductase isoform X1	1	1	TER; very-long-chain enoyl-CoA reductase [EC:1.3.1.93]
CSA005456.1	uncharacterized protein LOC18587598	1	1
CSA005470.1	proteasome subunit beta type-6	1	1	PSMB6; 20S proteasome subunit beta 1 [EC:3.4.25.1]
CSA005513.1	anthocyanin 3'-O-beta-glucosyltransferase-like	1	1
CSA005554.1	oligouridylate-binding protein 1-like	1	1
CSA005599.1	stress-response A/B barrel domain-containing protein UP3-like	1	1
CSA005732.1	universal stress protein A-like protein	1	1
CSA005915.1	uncharacterized protein LOC103418606	1	1
CSA005976.1	UDP-D-apiose/UDP-D-xylose synthase 2	1	1	AXS; UDP-apiose/xylose synthase
CSA006256.1	translation initiation factor IF-2, chloroplastic isoform X2	1	1
CSA006652.1	UBIQUITIN-SPECIFIC PROTEASE 12 family protein	1	1
CSA006668.1	Glucose-6-phosphate 1-dehydrogenase, cytoplasmic isoform 2	1	1
CSA006731.1	stress-response A/B barrel domain-containing protein At5g22580	1	1
CSA006773.1	eukaryotic translation initiation factor 3 subunit M	1	1
CSA006940.1	uncharacterized protein LOC104611247	1	1
CSA007056.1	phenylalanine--tRNA ligase alpha subunit, cytoplasmic	1	1	FARSA; phenylalanyl-tRNA synthetase alpha chain [EC:6.1.1.20]
CSA007377.1	charged multivesicular body protein 5-like	1	1
CSA007496.1	heterogeneous nuclear ribonucleoprotein 1-like	1	1	HNRNPA1_3; heterogeneous nuclear ribonucleoprotein A1/A3
CSA007585.1	50S ribosomal protein L29, chloroplastic	1	1	RP-L29; large subunit ribosomal protein L29
CSA007591.1	protein DJ-1 homolog D-like isoform X1	1	1
CSA007747.1	T-complex protein 1 subunit eta	1	1
CSA008456.1	3-isopropylmalate dehydratase large subunit-like isoform X1	1	1	leuC; 3-isopropylmalate/(R)-2-methylmalate dehydratase large subunit [EC:4.2.1.33 4.2.1.35]
CSA008464.1	GDSL esterase/lipase APG	1	1
CSA008684.1	aldose 1-epimerase	1	1	galM; aldose 1-epimerase [EC:5.1.3.3]
CSA008855.1	chlorophyll a-b binding protein CP24 10A, chloroplastic	1	1
CSA008856.1	chlorophyll a-b binding protein CP24 10A, chloroplastic	1	1
CSA009387.1	NADH dehydrogenase	1	1
CSA009539.1	probable pre-mRNA-splicing factor ATP-dependent RNA helicase DEAH2 isoform X1	1	1	DHX15; pre-mRNA-splicing factor ATP-dependent RNA helicase DHX15/PRP43 [EC:3.6.4.13]
CSA009573.1	RNA polymerase II-associated protein 3 isoform X2	1	1
CSA009617.1	glycerophosphodiester phosphodiesterase GDPD6	1	1	E3.1.4.46; glycerophosphoryl diester phosphodiesterase [EC:3.1.4.46]
CSA010530.1	14-3-3-like protein GF14 kappa	1	1
CSA010601.1	putative GDP-L-fucose synthase 2	1	1	TSTA3; GDP-L-fucose synthase [EC:1.1.1.271]
CSA010813.1	uncharacterized protein LOC8266439	1	1
CSA011243.1	putative 3,4-dihydroxy-2-butanone kinase	1	1	DAK; triose/dihydroxyacetone kinase / FAD-AMP lyase (cyclizing) [EC:2.7.1.28 2.7.1.29 4.6.1.15]
CSA011385.1	protein FAR1-RELATED SEQUENCE 3	1	1
CSA011430.1	psbP-like protein 1, chloroplastic	1	1	psbP; photosystem II oxygen-evolving enhancer protein 2
CSA011498.1	ferredoxin-thioredoxin reductase catalytic chain, chloroplastic	1	1
CSA011608.1	26S protease regulatory subunit 10B homolog A-like, partial	1	1
CSA011636.1	uncharacterized protein LOC107862820	1	1	NDC1; nucleoporin NDC1
CSA012042.1	V-type proton ATPase subunit G 1	1	1	ATPeV1G; V-type H+-transporting ATPase subunit G
CSA012062.1	dihydroxy-acid dehydratase-like	1	1	ilvD; dihydroxy-acid dehydratase [EC:4.2.1.9]
CSA012187.1	UBP1-associated protein 2C	1	1	HNRNPA1_3; heterogeneous nuclear ribonucleoprotein A1/A3
CSA012353.1	ATP sulfurylase 1, chloroplastic	1	1	PAPSS; 3'-phosphoadenosine 5'-phosphosulfate synthase [EC:2.7.7.4 2.7.1.25]
CSA012375.1	methyl-CpG-binding domain-containing protein 11-like	1	1
CSA012423.1	glycylpeptide N-tetradecanoyltransferase 1-like	1	1
CSA012444.1	cytochrome b5 isoform E-like	1	1
CSA012849.1	bifunctional protein FolD 4, chloroplastic	1	1
CSA012876.1	1-aminocyclopropane-1-carboxylate oxidase	1	1	E1.14.17.4; aminocyclopropanecarboxylate oxidase [EC:1.14.17.4]
CSA012966.1	protein argonaute 4A	1	1
CSA013184.1	Chaperone protein	1	1
CSA013361.1	probable aldo-keto reductase 2	1	1
CSA013673.1	uncharacterized protein LOC100261348	1	1
CSA013853.1	signal recognition particle receptor subunit beta-like	1	1	SRPRB; signal recognition particle receptor subunit beta
CSA014302.1	magnesium-chelatase subunit ChlI, chloroplastic-like isoform X3	1	1	chlI; magnesium chelatase subunit I [EC:6.6.1.1]
CSA014356.1	histidine biosynthesis bifunctional protein hisIE, chloroplastic	1	1	hisIE; phosphoribosyl-ATP pyrophosphohydrolase / phosphoribosyl-AMP cyclohydrolase [EC:3.6.1.31 3.5.4.19]
CSA014398.1	uncharacterized protein LOC100852852	1	1
CSA014627.1	membrane steroid-binding protein 2-like	1	1
CSA014639.1	uncharacterized protein LOC102599811	1	1
CSA014683.1	V-type proton ATPase subunit d2-like	1	1
CSA015249.1	tubulin gamma-1 chain	1	1
CSA015323.1	carbon catabolite repressor protein 4 homolog 1	1	1	CNOT6; CCR4-NOT transcription complex subunit 6 [EC:3.1.13.4]
CSA015506.1	dnaJ protein homolog	1	1
CSA015736.1	protein CHUP1, chloroplastic	1	1
CSA016033.1	kinesin-like protein KIN-14B	1	1
CSA016157.1	biotin carboxyl carrier protein of acetyl-CoA carboxylase	1	1
CSA016229.1	adenylate kinase 4	1	1	adk; adenylate kinase [EC:2.7.4.3]
CSA016550.1	S-adenosylmethionine synthase 3	1	1	metK; S-adenosylmethionine synthetase [EC:2.5.1.6]
CSA016615.1	probable bifunctional TENA-E protein	1	1	TENA_E; formylaminopyrimidine deformylase / aminopyrimidine aminohydrolase [EC:3.5.1.- 3.5.99.-]
CSA016993.1	myosin-related family protein	1	1
CSA017092.1	bifunctional dTDP-4-dehydrorhamnose 3,5-epimerase/dTDP-4-dehydrorhamnose reductase	1	1	UER1; 3,5-epimerase/4-reductase [EC:5.1.3.- 1.1.1.-]
CSA017146.1	uncharacterized protein LOC100305708	1	1	SUMO; small ubiquitin-related modifier
CSA017233.1	mitochondrial import inner membrane translocase subunit TIM44-2	1	1
CSA017429.1	RAN GTPase-activating protein 1	1	1	RANGAP1; Ran GTPase-activating protein 1
CSA017525.1	glucose-6-phosphate isomerase, cytosolic	1	1	GPI; glucose-6-phosphate isomerase [EC:5.3.1.9]
CSA017755.1	Proliferating cell nuclear antigen	1	1	PCNA; proliferating cell nuclear antigen
CSA017935.1	SNF1-related protein kinase catalytic subunit alpha KIN10-like isoform X2	1	1
CSA018031.1	DNA replication licensing factor MCM7	1	1	MCM7; DNA replication licensing factor MCM7 [EC:3.6.4.12]
CSA018197.1	leucine--tRNA ligase, cytoplasmic-like	1	1	LARS; leucyl-tRNA synthetase [EC:6.1.1.4]
CSA018265.1	60S ribosomal export protein NMD3	1	1	NMD3; nonsense-mediated mRNA decay protein 3
CSA019307.1	actin-interacting protein 1-2-like	1	1
CSA019410.1	nodal modulator 1	1	1
CSA019454.1	ATP-dependent 6-phosphofructokinase 4, chloroplastic	1	1	pfkA; 6-phosphofructokinase 1 [EC:2.7.1.11]
CSA019620.1	magnesium-chelatase subunit ChlD, chloroplastic	1	1	chlD; magnesium chelatase subunit D [EC:6.6.1.1]
CSA019857.1	pentatricopeptide repeat-containing protein At3g49240	1	1
CSA019997.1	dihydrolipoyllysine-residue succinyltransferase component of 2-oxoglutarate dehydrogenase complex 2, mitochondrial-like	1	1	DLST; 2-oxoglutarate dehydrogenase E2 component (dihydrolipoamide succinyltransferase) [EC:2.3.1.61]
CSA020306.1	calcium-transporting ATPase 4, endoplasmic reticulum-type	1	1
CSA020316.1	pectinesterase-like	1	1
CSA020576.1	peroxisomal membrane protein 11C	1	1
CSA020777.1	uncharacterized oxidoreductase At4g09670	1	1
CSA021499.1	tryptophan synthase beta chain 1	1	1	trpB; tryptophan synthase beta chain [EC:4.2.1.20]
CSA021620.1	dolichyl-diphosphooligosaccharide--protein glycosyltransferase subunit 2-like	1	1	SWP1; oligosaccharyltransferase complex subunit delta (ribophorin II)
CSA021675.1	putative glucose-6-phosphate 1-epimerase	1	1
CSA021707.1	50S ribosomal protein L13, chloroplastic-like	1	1	RP-L13; large subunit ribosomal protein L13
CSA021786.1	protein transport protein SEC31 homolog B isoform X2	1	1	SEC31; protein transport protein SEC31
CSA021804.1	60S ribosomal protein L35-like	1	1	RP-L35e; large subunit ribosomal protein L35e
CSA021941.1	serine/threonine-protein phosphatase PP1 isozyme 2	1	1
CSA021954.1	thiamine thiazole synthase 2, chloroplastic-like	1	1
CSA021995.1	uncharacterized protein LOC100266068 isoform X2	1	1
CSA022105.1	anthranilate phosphoribosyltransferase, chloroplastic	1	1	trpD; anthranilate phosphoribosyltransferase [EC:2.4.2.18]
CSA022206.1	anthocyanin 3'-O-beta-glucosyltransferase-like	1	1
CSA022347.1	xylulose kinase	1	1	xylB; xylulokinase [EC:2.7.1.17]
CSA022565.1	S-formylglutathione hydrolase-like isoform X2	1	1
CSA022646.1	Glucan endo-1,3-beta-glucosidase, basic isoform	1	1
CSA022723.1	protein MEI2-like 5	1	1
CSA022894.1	3-ketoacyl-CoA synthase 6	1	1	KCS; 3-ketoacyl-CoA synthase [EC:2.3.1.199]
CSA023308.1	omega-hydroxypalmitate O-feruloyl transferase	1	1	HHT1; omega-hydroxypalmitate O-feruloyl transferase [EC:2.3.1.188]
CSA023321.1	switch-associated protein 70	1	1
CSA023509.1	AAA-type ATPase family protein	1	1	PSMC5; 26S proteasome regulatory subunit T6
CSA024442.1	signal recognition particle 9 kDa protein	1	1	SRP9; signal recognition particle subunit SRP9
CSA024521.1	peroxisomal (S)-2-hydroxy-acid oxidase GLO1 isoform X1	1	1	HAO; (S)-2-hydroxy-acid oxidase [EC:1.1.3.15]
CSA024654.1	DNA-binding protein DDB_G0278111-like isoform X1	1	1
CSA024689.1	fatty-acid-binding protein 1	1	1
CSA024690.1	fatty-acid-binding protein 1-like	1	1
CSA025279.1	uncharacterized protein LOC104609046	1	1
CSA025304.1	Eukaryotic peptide chain release factor GTP-binding subunit	1	1	ERF3; peptide chain release factor subunit 3
CSA025474.1	isopentenyl-diphosphate Delta-isomerase II	1	1
CSA025818.1	protein TOPLESS	1	1
CSA025920.1	aspartokinase 2, chloroplastic isoform X1	1	1	lysC; aspartate kinase [EC:2.7.2.4]
CSA026143.1	short-chain dehydrogenase TIC 32, chloroplastic	1	1
CSA026298.1	serine hydroxymethyltransferase, mitochondrial	1	1	glyA; glycine hydroxymethyltransferase [EC:2.1.2.1]
CSA026351.1	2-methylene-furan-3-one reductase	1	1
CSA026777.1	protein IN2-1 homolog B	1	1
CSA027186.1	reticulon-like protein B5	1	1
CSA027384.1	histone H2AX	1	1
CSA027412.1	transmembrane 9 superfamily member 3	1	1
CSA027434.1	bifunctional dihydrofolate reductase-thymidylate synthase isoform X2	1	1	DHFR-TS; dihydrofolate reductase / thymidylate synthase [EC:1.5.1.3 2.1.1.45]
CSA027674.1	adenylosuccinate synthetase 2, chloroplastic	1	1	purA; adenylosuccinate synthase [EC:6.3.4.4]
CSA028033.1	uncharacterized protein LOC102612790	1	1
CSA028201.1	cysteine protease RD19A-like	1	1	CTSF; cathepsin F [EC:3.4.22.41]
CSA028284.1	KH domain-containing protein At4g18375-like	1	1
CSA028473.1	transmembrane protein 33 homolog	1	1
CSA028843.1	heme-binding-like protein At3g10130, chloroplastic isoform X2	1	1
CSA028921.1	cinnamoyl-CoA reductase 1-like	1	1
CSA028950.1	protein STABILIZED1	1	1	PRPF6; pre-mRNA-processing factor 6
CSA028953.1	protochlorophyllide reductase	1	1
CSA029151.1	D-3-phosphoglycerate dehydrogenase 2, chloroplastic-like	1	1
CSA029156.1	very-long-chain 3-oxoacyl-CoA reductase 1	1	1	HSD17B12; 17beta-estradiol 17-dehydrogenase / very-long-chain 3-oxoacyl-CoA reductase [EC:1.1.1.62 1.1.1.330]
CSA029177.1	upstream activation factor subunit UAF30-like	1	1
CSA029333.1	beta-glucosidase BoGH3B	1	1
CSA029454.1	uncharacterized protein LOC103935049	1	1	COX2; cytochrome c oxidase subunit 2
CSA029482.1	uncharacterized protein LOC104601403	1	1
CSA029723.1	glycine cleavage system H protein 3, mitochondrial	1	1	gcvH; glycine cleavage system H protein
CSA029910.1	chaperone protein dnaJ 10	1	1
CSA029941.1	DNA damage-binding protein 1 isoform X2	1	1	DDB1; DNA damage-binding protein 1
CSA029967.1	photosynthetic NDH subunit of lumenal location 5, chloroplastic	1	1
CSA030116.1	aldehyde dehydrogenase family 7 member B4 isoform X2	1	1	ALDH7A1; aldehyde dehydrogenase family 7 member A1 [EC:1.2.1.31 1.2.1.8 1.2.1.3]
CSA030118.1	protein fluG	1	1
CSA030285.1	sec14 cytosolic factor-like isoform X1	1	1
CSA030432.1	stromal cell-derived factor 2-like protein	1	1
CSA030563.1	profilin-like	1	1
CSA030644.1	ATP synthase subunit d, mitochondrial-like	1	1
CSA030699.1	cytosolic malate dehydrogenase family protein	1	1
CSA031198.1	vestitone reductase-like	1	1
CSA031313.1	NADH dehydrogenase	1	1	NDUFA8; NADH dehydrogenase (ubiquinone) 1 alpha subcomplex subunit 8
CSA031438.1	T-complex protein 1 subunit epsilon	1	1
CSA031573.1	auxin-binding protein ABP19a	1	1
CSA031822.1	desiccation protectant protein Lea14 homolog	1	1
CSA031881.1	cinnamate beta-D-glucosyltransferase-like	1	1
CSA031883.1	guanylate-binding protein 2	1	1
CSA032080.1	V-type proton ATPase subunit D-like	1	1	ATPeV1D; V-type H+-transporting ATPase subunit D
CSA032088.1	26S protease regulatory subunit 4 homolog	1	1
CSA032695.1	auxin-binding protein ABP19a-like	1	1
CSA032830.1	pyruvate decarboxylase 2	1	1	PDC; pyruvate decarboxylase [EC:4.1.1.1]
CSA032978.1	uncharacterized protein OsI_027940 isoform X2	1	1
CSA033058.1	ras-related protein RHN1 isoform X2	1	1
CSA033096.1	ATP-citrate synthase beta chain protein 2-like	1	1
CSA033640.1	protein-lysine N-methyltransferase Mettl10-like	1	1
CSA033642.1	26S proteasome non-ATPase regulatory subunit 13 homolog A	1	1	PSMD13; 26S proteasome regulatory subunit N9
CSA033672.1	stromal cell-derived factor 2-like protein	1	1
CSA033673.1	40S ribosomal protein S12	1	1	RP-S12e; small subunit ribosomal protein S12e
CSA033987.1	probable methyltransferase PMT3	1	1
CSA034251.1	probable UDP-arabinopyranose mutase 5 isoform X2	1	1	RGP; reversibly glycosylated polypeptide / UDP-arabinopyranose mutase [EC:2.4.1.- 5.4.99.30]
CSA034325.1	proline--tRNA ligase, cytoplasmic-like	1	1	PARS; prolyl-tRNA synthetase [EC:6.1.1.15]
CSA034335.1	histidinol dehydrogenase, chloroplastic isoform X1	1	1	hisD; histidinol dehydrogenase [EC:1.1.1.23]
CSA034363.1	obg-like ATPase 1	1	1
CSA034432.1	aldehyde dehydrogenase family 2 member B4, mitochondrial-like	1	1
CSA034831.1	remorin-like isoform X2	1	1
CSA034876.1	pre-mRNA cleavage factor Im 25 kDa subunit 2	1	1	NUDT21; cleavage and polyadenylation specificity factor subunit 5
CSA035044.1	dehydroascorbate reductase	1	1	DHAR; glutathione dehydrogenase/transferase [EC:1.8.5.1 2.5.1.18]
CSA035203.1	EKC/KEOPS complex subunit Tprkb	1	1
CSA035284.1	probable voltage-gated potassium channel subunit beta	1	1
CSA035298.1	protein SUPPRESSOR OF GENE SILENCING 3	1	1
CSA035431.1	methylenetetrahydrofolate reductase 2-like	1	1
CSA035477.1	NADH--cytochrome b5 reductase 1	1	1	E1.6.2.2; cytochrome-b5 reductase [EC:1.6.2.2]
CSA036031.1	2-alkenal reductase (NADP(+)-dependent)-like	1	1
CSA036231.1	40S ribosomal protein S15	1	1	RP-S15e; small subunit ribosomal protein S15e
CSA036400.1	BAHD acyltransferase DCR	1	1
CSA036463.1	probable calcium-binding protein CML13	1	1	CML; calcium-binding protein CML
CSA036501.1	uncharacterized protein At3g03773-like	1	1
CSA036561.1	glycine cleavage system H protein, mitochondrial	1	1	gcvH; glycine cleavage system H protein
CSA036687.1	acetyl-coenzyme A carboxylase carboxyl transferase subunit alpha, chloroplastic-like	1	1	accA; acetyl-CoA carboxylase carboxyl transferase subunit alpha [EC:6.4.1.2]
CSA025803.1	abscisic stress-ripening protein 2-like	2	4
CSA009444.1	abscisic stress-ripening protein 2	3	2
