# Supplementary material for: Proteome and Acetyl-Proteome Profiling of Camellia sinensis cv. ‘Anji Baicha’ during Periodic Albinism Reveals Alterations in Photosynthetic and Secondary Metabolite Biosynthetic Pathways
Source: Front Plant Sci. 2017 Dec 11;8:2104. doi: 10.3389/fpls.2017.02104 (PMC5732353; doi:10.3389/fpls.2017.02104)
Supplement: Table S8 — Overlapped sites in succinylome and acetylome of ‘Anji Baicha.’ [file Table8.XLSX]

## Sheet: Overlap identified sites
Protein accession	Position	Amino acid	Protein description
CSA000011.1	625	K	sucrose synthase
CSA000036.1	364	K	pyrophosphate-energized vacuolar membrane proton pump-like
CSA000306.1	532	K	heat shock cognate 70 kDa protein 2-like
CSA000306.1	539	K	heat shock cognate 70 kDa protein 2-like
CSA000306.1	540	K	heat shock cognate 70 kDa protein 2-like
CSA000531.1	109	K	20 kDa chaperonin, chloroplastic-like
CSA000963.1	539	K	heat shock cognate 70 kDa protein 2-like
CSA001061.1	71	K	60S ribosomal protein L24-like
CSA001114.1	177	K	glutamine synthetase leaf isozyme, chloroplastic
CSA001114.1	327	K	glutamine synthetase leaf isozyme, chloroplastic
CSA001404.1	345	K	ATP synthase gamma chain, chloroplastic
CSA001619.1	670	K	trifunctional UDP-glucose 4,6-dehydratase/UDP-4-keto-6-deoxy-D-glucose 3,5-epimerase/UDP-4-keto-L-rhamnose-reductase RHM1
CSA001667.1	232	K	elongation factor 1-alpha
CSA001864.1	524	K	heat shock protein 90-5, chloroplastic
CSA001864.1	725	K	heat shock protein 90-5, chloroplastic
CSA002335.1	97	K	uncharacterized protein LOC102623101
CSA002354.1	337	K	uncharacterized protein LOC109244961
CSA002530.1	284	K	U3 small nucleolar RNA-associated protein 25
CSA002537.1	397	K	chaperonin CPN60-2, mitochondrial-like
CSA002537.1	494	K	chaperonin CPN60-2, mitochondrial-like
CSA002537.1	547	K	chaperonin CPN60-2, mitochondrial-like
CSA002568.1	233	K	uncharacterized protein At5g02240-like
CSA002629.1	195	K	branched-chain-amino-acid aminotransferase 3, chloroplastic
CSA002938.1	519	K	sulfite reductase
CSA003060.1	538	K	linoleate 13S-lipoxygenase 2-1, chloroplastic-like
CSA003118.1	182	K	triosephosphate isomerase, chloroplastic
CSA003118.1	261	K	triosephosphate isomerase, chloroplastic
CSA003232.1	400	K	elongation factor 1-gamma
CSA003234.1	37	K	transcription factor BTF3 homolog 4
CSA003339.1	200	K	subtilisin-like protease SBT2.5 isoform X3
CSA003473.1	512	K	4-coumarate--CoA ligase-like 7
CSA003662.1	371	K	ribulose bisphosphate carboxylase/oxygenase activase, chloroplastic isoform X2
CSA004129.1	487	K	UDP-glycosyltransferase 73C2
CSA004426.1	237	K	adenosylhomocysteinase
CSA004532.1	113	K	chlorophyll a-b binding protein CP26, chloroplastic
CSA004763.1	63	K	ribulose bisphosphate carboxylase small chain, chloroplastic-like
CSA004763.1	110	K	ribulose bisphosphate carboxylase small chain, chloroplastic-like
CSA004763.1	144	K	ribulose bisphosphate carboxylase small chain, chloroplastic-like
CSA004763.1	160	K	ribulose bisphosphate carboxylase small chain, chloroplastic-like
CSA004796.1	63	K	uncharacterized protein LOC102631030
CSA004796.1	67	K	uncharacterized protein LOC102631030
CSA004910.1	61	K	peroxisomal and mitochondrial division factor 2
CSA005059.1	182	K	putative lactoylglutathione lyase isoform X2
CSA005116.1	38	K	fructose-bisphosphate aldolase, cytoplasmic isozyme 1
CSA005470.1	200	K	proteasome subunit beta type-6
CSA005554.1	79	K	oligouridylate-binding protein 1-like
CSA006145.1	225	K	uncharacterized protein LOC107434073
CSA006423.1	104	K	probable glutathione S-transferase
CSA006423.1	125	K	probable glutathione S-transferase
CSA006518.1	370	K	chaperonin CPN60-2, mitochondrial
CSA006652.1	644	K	UBIQUITIN-SPECIFIC PROTEASE 12 family protein
CSA006731.1	35	K	stress-response A/B barrel domain-containing protein At5g22580
CSA007370.1	289	K	probable fructokinase-4 isoform X2
CSA007496.1	5	K	heterogeneous nuclear ribonucleoprotein 1-like
CSA007591.1	151	K	protein DJ-1 homolog D-like isoform X1
CSA008160.1	97	K	uncharacterized protein OsI_027940 isoform X2
CSA008464.1	254	K	GDSL esterase/lipase APG
CSA008732.1	77	K	40S ribosomal protein S18-like
CSA008855.1	196	K	chlorophyll a-b binding protein CP24 10A, chloroplastic
CSA008945.1	406	K	ruBisCO large subunit-binding protein subunit beta, chloroplastic
CSA009227.1	532	K	heat shock cognate 70 kDa protein 2-like
CSA009227.1	539	K	heat shock cognate 70 kDa protein 2-like
CSA009375.1	32	K	cysteine proteinase inhibitor-like
CSA009387.1	80	K	NADH dehydrogenase
CSA009388.1	19	K	NADH dehydrogenase
CSA009444.1	100	K	abscisic stress-ripening protein 2
CSA009564.1	68	K	zinc finger BED domain-containing protein DAYSLEEPER-like
CSA009913.1	293	K	probable mitochondrial-processing peptidase subunit beta, mitochondrial
CSA009966.1	389	K	fructose-bisphosphate aldolase 1, chloroplastic
CSA010083.1	237	K	eukaryotic initiation factor 4A-2
CSA010083.1	291	K	eukaryotic initiation factor 4A-2
CSA010160.1	146	K	dihydrolipoyl dehydrogenase 1, mitochondrial
CSA010324.1	749	K	chaperone protein ClpB1
CSA010324.1	752	K	chaperone protein ClpB1
CSA010446.1	552	K	ruBisCO large subunit-binding protein subunit alpha
CSA010476.1	126	K	primary amine oxidase-like
CSA010785.1	48	K	glutamine synthetase cytosolic isozyme 1
CSA010785.1	267	K	glutamine synthetase cytosolic isozyme 1
CSA010862.1	212	K	chlorophyll a-b binding protein CP29.1, chloroplastic
CSA011032.1	190	K	60S ribosomal protein L18a-like
CSA011064.1	290	K	eukaryotic initiation factor 4A-3
CSA011124.1	723	K	DNA replication licensing factor MCM5
CSA011243.1	428	K	putative 3,4-dihydroxy-2-butanone kinase
CSA011619.1	32	K	heat shock 70 kDa protein 14-like
CSA011668.1	189	K	glyceraldehyde-3-phosphate dehydrogenase, cytosolic-like
CSA011778.1	161	K	CBS domain-containing protein CBSX3, mitochondrial
CSA011928.1	411	K	elongation factor 2
CSA011948.1	125	K	proteasome subunit beta type-5
CSA011978.1	85	K	60S ribosomal protein L44-like
CSA012185.1	89	K	adenosine kinase 2
CSA012185.1	95	K	adenosine kinase 2
CSA012185.1	335	K	adenosine kinase 2
CSA012375.1	120	K	methyl-CpG-binding domain-containing protein 11-like
CSA012503.1	344	K	protochlorophyllide reductase, chloroplastic
CSA012537.1	577	K	heat shock 70 kDa protein, mitochondrial-like
CSA012667.1	105	K	linoleate 13S-lipoxygenase 2-1, chloroplastic-like
CSA012942.1	163	K	60S ribosomal protein L18-2-like
CSA013361.1	115	K	probable aldo-keto reductase 2
CSA013417.1	156	K	probable protein disulfide-isomerase A6
CSA013417.1	222	K	probable protein disulfide-isomerase A6
CSA013503.1	330	K	histone H1
CSA013701.1	210	K	glutathione S-transferase T1
CSA013744.1	176	K	serine hydroxymethyltransferase 3, chloroplastic-like
CSA013811.1	271	K	heat shock cognate protein 80
CSA013811.1	538	K	heat shock cognate protein 80
CSA013844.1	418	K	glutathione reductase, chloroplastic
CSA014398.1	468	K	uncharacterized protein LOC100852852
CSA014653.1	210	K	chlorophyll a-b binding protein CP29.1, chloroplastic
CSA015145.1	23	K	T-complex protein 1 subunit delta
CSA015145.1	226	K	T-complex protein 1 subunit delta
CSA015502.1	270	K	26S proteasome non-ATPase regulatory subunit 14 homolog
CSA015535.1	457	K	clathrin heavy chain 1
CSA015683.1	236	K	dnaJ protein P58IPK homolog
CSA015743.1	310	K	elongation factor 2
CSA015743.1	722	K	elongation factor 2
CSA016043.1	413	K	ATP-dependent Clp protease ATP-binding subunit ClpA homolog CD4B, chloroplastic-like
CSA016043.1	605	K	ATP-dependent Clp protease ATP-binding subunit ClpA homolog CD4B, chloroplastic-like
CSA016057.1	94	K	galactokinase
CSA016076.1	40	K	phenylalanine ammonia-lyase
CSA016128.1	362	K	pyrophosphate-energized vacuolar membrane proton pump
CSA016290.1	15	K	60S ribosomal protein L30-like
CSA016615.1	19	K	probable bifunctional TENA-E protein
CSA017090.1	126	K	probable zinc metallopeptidase EGY3, chloroplastic isoform X1
CSA017432.1	514	K	vesicle-fusing ATPase-like
CSA017525.1	24	K	glucose-6-phosphate isomerase, cytosolic
CSA017698.1	206	K	guanosine nucleotide diphosphate dissociation inhibitor 2 isoform X2
CSA017806.1	43	K	dnaJ protein ERDJ3B-like
CSA018092.1	55	K	glutamate-1-semialdehyde 2,1-aminomutase 2, chloroplastic
CSA018101.1	496	K	probable nucleoredoxin 1
CSA018167.1	383	K	presequence protease 1, chloroplastic/mitochondrial-like isoform X1
CSA018167.1	763	K	presequence protease 1, chloroplastic/mitochondrial-like isoform X1
CSA018282.1	13	K	L-ascorbate peroxidase 1, cytosolic isoform X2
CSA018288.1	108	K	2-Cys peroxiredoxin BAS1, chloroplastic
CSA018358.1	76	K	26S protease regulatory subunit 6B homolog
CSA018939.1	21	K	importin subunit beta-1
CSA018950.1	159	K	glyceraldehyde-3-phosphate dehydrogenase B, chloroplastic
CSA019726.1	428	K	valine--tRNA ligase, mitochondrial 1 isoform X2
CSA019750.1	4	K	triosephosphate isomerase, cytosolic
CSA020576.1	166	K	peroxisomal membrane protein 11C
CSA020605.1	60	K	ribulose bisphosphate carboxylase large chain (chloroplast)
CSA020605.1	300	K	ribulose bisphosphate carboxylase large chain (chloroplast)
CSA020775.1	248	K	uncharacterized oxidoreductase At4g09670-like
CSA021087.1	183	K	phospho-2-dehydro-3-deoxyheptonate aldolase 2, chloroplastic
CSA021143.1	515	K	apoptotic chromatin condensation inducer in the nucleus-like isoform X1
CSA021191.1	156	K	annexin D1
CSA021191.1	241	K	annexin D1
CSA021472.1	47	K	multiprotein-bridging factor 1b
CSA021499.1	215	K	tryptophan synthase beta chain 1
CSA022278.1	202	K	T-complex protein 1 subunit zeta-like isoform X2
CSA022360.1	41	K	methyl-CpG-binding domain-containing protein 11 isoform X1
CSA022565.1	19	K	S-formylglutathione hydrolase-like isoform X2
CSA022721.1	440	K	ATP sulfurylase 2
CSA022721.1	467	K	ATP sulfurylase 2
CSA023397.1	40	K	MLP-like protein 423
CSA023554.1	276	K	MALE GAMETOPHYTE DEFECTIVE 1
CSA023573.1	110	K	translationally-controlled tumor protein homolog
CSA024064.1	184	K	chlorophyll a-b binding protein 6A, chloroplastic
CSA024149.1	13	K	mitochondrial outer membrane protein porin of 34 kDa
CSA024339.1	319	K	elongation factor Tu, mitochondrial
CSA024442.1	24	K	signal recognition particle 9 kDa protein
CSA024512.1	32	K	40S ribosomal protein S17-4-like
CSA024647.1	288	K	protein SIEVE ELEMENT OCCLUSION B-like
CSA024653.1	18	K	coatomer subunit zeta-1-like
CSA025224.1	234	K	chloroplast stem-loop binding protein of 41 kDa b, chloroplastic isoform X2
CSA025474.1	43	K	isopentenyl-diphosphate Delta-isomerase II
CSA025498.1	494	K	hsp70-Hsp90 organizing protein 3-like
CSA025704.1	185	K	aconitate hydratase, cytoplasmic
CSA025803.1	175	K	abscisic stress-ripening protein 2-like
CSA026004.1	119	K	oxygen-evolving enhancer protein 3-2, chloroplastic
CSA026073.1	319	K	stromal 70 kDa heat shock-related protein, chloroplastic
CSA026350.1	59	K	2-methylene-furan-3-one reductase
CSA026365.1	150	K	phosphoenolpyruvate carboxylase, housekeeping isozyme-like
CSA026696.1	35	K	5-methyltetrahydropteroyltriglutamate--homocysteine methyltransferase-like
CSA026696.1	142	K	5-methyltetrahydropteroyltriglutamate--homocysteine methyltransferase-like
CSA026777.1	63	K	protein IN2-1 homolog B
CSA026796.1	179	K	glyceraldehyde-3-phosphate dehydrogenase A, chloroplastic
CSA026796.1	186	K	glyceraldehyde-3-phosphate dehydrogenase A, chloroplastic
CSA026796.1	321	K	glyceraldehyde-3-phosphate dehydrogenase A, chloroplastic
CSA026954.1	252	K	uncharacterized protein LOC109161438
CSA027312.1	100	K	photosystem I reaction center subunit IV A
CSA027384.1	129	K	histone H2AX
CSA027434.1	65	K	bifunctional dihydrofolate reductase-thymidylate synthase isoform X2
CSA027795.1	320	K	monodehydroascorbate reductase isoform X1
CSA027893.1	261	K	protein ASPARTIC PROTEASE IN GUARD CELL 2
CSA027893.1	367	K	protein ASPARTIC PROTEASE IN GUARD CELL 2
CSA028001.1	92	K	elongation factor 1-beta-like
CSA028037.1	13	K	mitochondrial outer membrane protein porin of 36 kDa
CSA028053.1	281	K	bifunctional 3-dehydroquinate dehydratase/shikimate dehydrogenase, chloroplastic-like isoform X1
CSA028263.1	147	K	anthranilate synthase alpha subunit 2, chloroplastic-like isoform X2
CSA028284.1	395	K	KH domain-containing protein At4g18375-like
CSA028473.1	12	K	transmembrane protein 33 homolog
CSA028496.1	283	K	phospholipase D alpha 1
CSA028530.1	275	K	translocase of chloroplast 34, chloroplastic isoform X2
CSA028643.1	13	K	mitochondrial outer membrane protein porin 2-like
CSA028843.1	258	K	heme-binding-like protein At3g10130, chloroplastic isoform X2
CSA028920.1	220	K	long chain acyl-CoA synthetase 4
CSA028921.1	33	K	cinnamoyl-CoA reductase 1-like
CSA028952.1	118	K	protochlorophyllide reductase
CSA028953.1	177	K	protochlorophyllide reductase
CSA029743.1	407	K	UTP--glucose-1-phosphate uridylyltransferase
CSA029832.1	75	K	aminopeptidase M1-like
CSA030367.1	562	K	luminal-binding protein 5
CSA030476.1	41	K	chlorophyll a-b binding protein of LHCII type 1-like
CSA030713.1	61	K	heat shock protein 83
CSA030713.1	498	K	heat shock protein 83
CSA030920.1	713	K	26S proteasome non-ATPase regulatory subunit 1 homolog A
CSA031127.1	180	K	UDP-glucuronic acid decarboxylase 6
CSA031427.1	106	K	60S ribosomal protein L7-2-like
CSA031438.1	91	K	T-complex protein 1 subunit epsilon
CSA031519.1	129	K	phosphoglycerate kinase, cytosolic
CSA031573.1	202	K	auxin-binding protein ABP19a
CSA031574.1	517	K	trigger factor-like protein TIG, Chloroplastic
CSA031781.1	211	K	adenosylhomocysteinase
CSA031784.1	278	K	bifunctional 3-dehydroquinate dehydratase/shikimate dehydrogenase, chloroplastic
CSA032088.1	20	K	26S protease regulatory subunit 4 homolog
CSA032333.1	614	K	2-oxoglutarate dehydrogenase, mitochondrial
CSA032366.1	54	K	60S ribosomal protein L28-2-like
CSA032534.1	78	K	endochitinase PR4
CSA032695.1	200	K	auxin-binding protein ABP19a-like
CSA032793.1	109	K	luminal-binding protein 5
CSA032793.1	350	K	luminal-binding protein 5
CSA032793.1	360	K	luminal-binding protein 5
CSA032793.1	455	K	luminal-binding protein 5
CSA032793.1	562	K	luminal-binding protein 5
CSA032934.1	89	K	bifunctional purine biosynthesis protein PurH-like isoform X2
CSA032934.1	320	K	bifunctional purine biosynthesis protein PurH-like isoform X2
CSA032978.1	101	K	uncharacterized protein OsI_027940 isoform X2
CSA033184.1	52	K	KH domain-containing protein At4g18375-like isoform X1
CSA033259.1	224	K	oxygen-evolving enhancer protein 2, chloroplastic-like
CSA033261.1	361	K	2,3-bisphosphoglycerate-independent phosphoglycerate mutase
CSA033283.1	135	K	polyadenylate-binding protein 2-like isoform X1
CSA033640.1	247	K	protein-lysine N-methyltransferase Mettl10-like
CSA033672.1	134	K	stromal cell-derived factor 2-like protein
CSA033748.1	616	K	eukaryotic translation initiation factor 3 subunit A
CSA033796.1	66	K	hsp70-Hsp90 organizing protein 3-like
CSA033864.1	109	K	photosystem I reaction center subunit N, chloroplastic-like
CSA033885.1	305	K	3-dehydroquinate synthase, chloroplastic
CSA034220.1	509	K	uncharacterized protein LOC103502522
CSA034251.1	278	K	probable UDP-arabinopyranose mutase 5 isoform X2
CSA034340.1	25	K	NADP-dependent glyceraldehyde-3-phosphate dehydrogenase
CSA034340.1	367	K	NADP-dependent glyceraldehyde-3-phosphate dehydrogenase
CSA034412.1	182	K	protochlorophyllide reductase, chloroplastic
CSA034412.1	367	K	protochlorophyllide reductase, chloroplastic
CSA034848.1	59	K	Succinyl-CoA ligase
CSA034878.1	166	K	Peroxisomal membrane protein 11C
CSA035036.1	140	K	chorismate synthase 1, chloroplastic-like
CSA035036.1	156	K	chorismate synthase 1, chloroplastic-like
CSA035207.1	87	K	fructose-bisphosphate aldolase cytoplasmic isozyme
CSA035317.1	52	K	serine--glyoxylate aminotransferase
CSA035477.1	51	K	NADH--cytochrome b5 reductase 1
CSA035726.1	18	K	60S ribosomal protein L7-2-like
CSA035808.1	406	K	coatomer subunit gamma-2
CSA036031.1	84	K	2-alkenal reductase (NADP(+)-dependent)-like
CSA036160.1	24	K	uncharacterized protein LOC100527647
CSA036209.1	62	K	apolipoprotein D
CSA036400.1	26	K	BAHD acyltransferase DCR
CSA036415.1	84	K	translationally-controlled tumor protein homolog
CSA036415.1	111	K	translationally-controlled tumor protein homolog
CSA036462.1	19	K	40S ribosomal protein S13-like
CSA036590.1	526	K	ruBisCO large subunit-binding protein subunit beta, chloroplastic
CSA036938.1	25	K	ribulose-1 (chloroplast)
CSA036938.1	198	K	ribulose-1 (chloroplast)
CSA036938.1	216	K	ribulose-1 (chloroplast)
CSA036938.1	267	K	ribulose-1 (chloroplast)
CSA036938.1	320	K	ribulose-1 (chloroplast)
CSA036938.1	371	K	ribulose-1 (chloroplast)
CSA000023.1	43	K	plasminogen activator inhibitor 1 RNA-binding protein-like
CSA000242.1	208	K	malate dehydrogenase
CSA000531.1	207	K	20 kDa chaperonin, chloroplastic-like
CSA000627.1	125	K	oxygen-evolving enhancer protein 1, chloroplastic
CSA000627.1	133	K	oxygen-evolving enhancer protein 1, chloroplastic
CSA000649.1	21	K	stachyose synthase-like
CSA000795.1	230	K	phosphoribulokinase, chloroplastic-like
CSA001169.1	46	K	multiprotein-bridging factor 1b
CSA001234.1	25	K	diphosphomevalonate decarboxylase MVD2-like
CSA001297.1	59	K	uncharacterized protein LOC107839337
CSA001425.1	67	K	delta(24)-sterol reductase
CSA001445.1	257	K	GDSL esterase/lipase 1-like
CSA001667.1	51	K	elongation factor 1-alpha
CSA001667.1	179	K	elongation factor 1-alpha
CSA001786.1	264	K	3-oxoacyl-[acyl-carrier-protein] reductase 4 isoform X2
CSA001815.1	11	K	acetyl-CoA acetyltransferase, cytosolic 1-like
CSA001864.1	377	K	heat shock protein 90-5, chloroplastic
CSA001864.1	503	K	heat shock protein 90-5, chloroplastic
CSA002108.1	92	K	carbonic anhydrase 2 isoform X1
CSA002361.1	141	K	chlorophyll a-b binding protein 13, chloroplastic
CSA002602.1	51	K	peptidyl-prolyl cis-trans isomerase
CSA002798.1	231	K	UBP1-associated protein 2A
CSA003162.1	32	K	GRF1-INTERACTING FACTOR 2 family protein
CSA003232.1	409	K	elongation factor 1-gamma
CSA003662.1	70	K	ribulose bisphosphate carboxylase/oxygenase activase, chloroplastic isoform X2
CSA004719.1	311	K	V-type proton ATPase subunit B 2 isoform X2
CSA005033.1	384	K	S-adenosylmethionine synthase 2
CSA005140.1	148	K	3-phosphoshikimate 1-carboxyvinyltransferase 2
CSA005282.1	123	K	protein TRI1-like
CSA006637.1	88	K	cytochrome b5-like isoform X1
CSA006880.1	40	K	uncharacterized protein At2g27730, mitochondrial
CSA008487.1	224	K	probable methionine--tRNA ligase
CSA008856.1	56	K	chlorophyll a-b binding protein CP24 10A, chloroplastic
CSA009186.1	384	K	S-adenosylmethionine synthase 2
CSA009227.1	540	K	heat shock cognate 70 kDa protein 2-like
CSA009521.1	303	K	GDP-mannose 4,6 dehydratase 1
CSA009573.1	113	K	RNA polymerase II-associated protein 3 isoform X2
CSA009617.1	205	K	glycerophosphodiester phosphodiesterase GDPD6
CSA009927.1	558	K	glycerol kinase-like
CSA010862.1	232	K	chlorophyll a-b binding protein CP29.1, chloroplastic
CSA011215.1	15	K	60S ribosomal protein L13-1
CSA011215.1	88	K	60S ribosomal protein L13-1
CSA011222.1	106	K	probable aldo-keto reductase 2
CSA011430.1	111	K	psbP-like protein 1, chloroplastic
CSA011608.1	24	K	26S protease regulatory subunit 10B homolog A-like, partial
CSA011966.1	49	K	uncharacterized protein LOC100245204 isoform X2
CSA012444.1	72	K	cytochrome b5 isoform E-like
CSA012667.1	86	K	linoleate 13S-lipoxygenase 2-1, chloroplastic-like
CSA013374.1	73	K	photosystem II 22 kDa protein, chloroplastic
CSA013547.1	271	K	heat shock cognate protein 80
CSA013702.1	142	K	probable phospholipid hydroperoxide glutathione peroxidase isoform X1
CSA013702.1	176	K	probable phospholipid hydroperoxide glutathione peroxidase isoform X1
CSA013811.1	277	K	heat shock cognate protein 80
CSA013811.1	603	K	heat shock cognate protein 80
CSA014639.1	283	K	uncharacterized protein LOC102599811
CSA014653.1	230	K	chlorophyll a-b binding protein CP29.1, chloroplastic
CSA014683.1	241	K	V-type proton ATPase subunit d2-like
CSA014832.1	20	K	NADH dehydrogenase
CSA015361.1	71	K	soluble inorganic pyrophosphatase 4
CSA015506.1	30	K	dnaJ protein homolog
CSA015535.1	1515	K	clathrin heavy chain 1
CSA015826.1	160	K	clathrin light chain 1-like
CSA016462.1	112	K	heat shock cognate 70 kDa protein 2
CSA016538.1	203	K	magnesium-protoporphyrin IX monomethyl ester
CSA016705.1	157	K	peptidyl-prolyl cis-trans isomerase FKBP62
CSA016706.1	50	K	FK506-binding protein 2
CSA016856.1	760	K	protein argonaute 4
CSA017146.1	28	K	uncharacterized protein LOC100305708
CSA017776.1	266	K	glucose-1-phosphate adenylyltransferase small subunit, chloroplastic/amyloplastic
CSA017891.1	353	K	glyoxysomal fatty acid beta-oxidation multifunctional protein MFP-a
CSA017891.1	582	K	glyoxysomal fatty acid beta-oxidation multifunctional protein MFP-a
CSA018358.1	326	K	26S protease regulatory subunit 6B homolog
CSA018358.1	405	K	26S protease regulatory subunit 6B homolog
CSA018562.1	105	K	3-isopropylmalate dehydrogenase, chloroplastic-like
CSA018562.1	127	K	3-isopropylmalate dehydrogenase, chloroplastic-like
CSA019411.1	806	K	nodal modulator 1
CSA019454.1	452	K	ATP-dependent 6-phosphofructokinase 4, chloroplastic
CSA019662.1	34	K	phosphoglycerate mutase-like protein 1 isoform X1
CSA019857.1	178	K	pentatricopeptide repeat-containing protein At3g49240
CSA019996.1	94	K	aminomethyltransferase, mitochondrial
CSA020117.1	454	K	glycine dehydrogenase (decarboxylating), mitochondrial
CSA020235.1	11	K	succinate dehydrogenase subunit 6, mitochondrial-like
CSA020480.1	279	K	ubiquinone biosynthesis protein COQ9-B, mitochondrial
CSA022045.1	263	K	peroxidase 12
CSA022065.1	342	K	probable Xaa-Pro aminopeptidase P isoform X1
CSA022105.1	334	K	anthranilate phosphoribosyltransferase, chloroplastic
CSA022786.1	230	K	2-alkenal reductase (NADP(+)-dependent) isoform X1
CSA022844.1	18	K	probable histone H2B.1
CSA022844.1	56	K	probable histone H2B.1
CSA022929.1	72	K	60S ribosomal protein L7a-1-like
CSA022929.1	252	K	60S ribosomal protein L7a-1-like
CSA022953.1	62	K	SKP1-like protein 1A isoform X1
CSA023469.1	106	K	isoflavone reductase-like protein
CSA023554.1	58	K	MALE GAMETOPHYTE DEFECTIVE 1
CSA024654.1	138	K	DNA-binding protein DDB_G0278111-like isoform X1
CSA024905.1	240	K	probable carboxylesterase 5
CSA025224.1	113	K	chloroplast stem-loop binding protein of 41 kDa b, chloroplastic isoform X2
CSA025279.1	5	K	uncharacterized protein LOC104609046
CSA025312.1	122	K	glutamate decarboxylase 1
CSA025321.1	222	K	uncharacterized protein LOC100259668
CSA025498.1	413	K	hsp70-Hsp90 organizing protein 3-like
CSA025687.1	69	K	60S ribosomal protein L23a
CSA025704.1	383	K	aconitate hydratase, cytoplasmic
CSA025818.1	87	K	protein TOPLESS
CSA026004.1	180	K	oxygen-evolving enhancer protein 3-2, chloroplastic
CSA026073.1	192	K	stromal 70 kDa heat shock-related protein, chloroplastic
CSA026073.1	369	K	stromal 70 kDa heat shock-related protein, chloroplastic
CSA026696.1	27	K	5-methyltetrahydropteroyltriglutamate--homocysteine methyltransferase-like
CSA026708.1	153	K	phosphoglycerate mutase-like protein 1
CSA026735.1	197	K	probable chalcone--flavonone isomerase 3
CSA027067.1	70	K	dynein light chain 1, cytoplasmic
CSA027399.1	218	K	DEAD-box ATP-dependent RNA helicase 38
CSA027594.1	355	K	enoyl-CoA hydratase/isomerase family protein
CSA029482.1	202	K	uncharacterized protein LOC104601403
CSA029580.1	209	K	26S protease regulatory subunit 7 homolog A isoform X2
CSA029775.1	266	K	chalcone synthase 1
CSA029877.1	22	K	calmodulin-7 isoform X1
CSA029952.1	232	K	SUN domain-containing protein 3-like
CSA029967.1	225	K	photosynthetic NDH subunit of lumenal location 5, chloroplastic
CSA030236.1	122	K	anthranilate synthase beta subunit 1, chloroplastic-like
CSA030285.1	132	K	sec14 cytosolic factor-like isoform X1
CSA030432.1	175	K	stromal cell-derived factor 2-like protein
CSA030487.1	41	K	GTP-binding protein SAR1A
CSA030565.1	154	K	ATP-dependent 6-phosphofructokinase 3-like isoform X1
CSA031789.1	228	K	reticulon-like protein B8
CSA031849.1	61	K	uncharacterized protein LOC108994590
CSA032793.1	113	K	luminal-binding protein 5
CSA033259.1	247	K	oxygen-evolving enhancer protein 2, chloroplastic-like
CSA033642.1	233	K	26S proteasome non-ATPase regulatory subunit 13 homolog A
CSA033748.1	348	K	eukaryotic translation initiation factor 3 subunit A
CSA033762.1	243	K	dihydrolipoyllysine-residue acetyltransferase component 2 of pyruvate dehydrogenase complex,mitochondrial
CSA033796.1	373	K	hsp70-Hsp90 organizing protein 3-like
CSA034409.1	28	K	26S proteasome regulatory subunit 4 homolog B
CSA034412.1	242	K	protochlorophyllide reductase, chloroplastic
CSA034848.1	217	K	Succinyl-CoA ligase
CSA035105.1	96	K	18.1 kDa class I heat shock protein
CSA035284.1	80	K	probable voltage-gated potassium channel subunit beta
CSA035286.1	98	K	probable voltage-gated potassium channel subunit beta
CSA035706.1	143	K	membrane-associated protein VIPP1, chloroplastic
CSA035706.1	165	K	membrane-associated protein VIPP1, chloroplastic
CSA036455.1	629	K	ATP-dependent zinc metalloprotease FTSH 2, chloroplastic
CSA036478.1	40	K	H/ACA ribonucleoprotein complex subunit 3-like protein
CSA036554.1	53	K	isocitrate dehydrogenase family protein
CSA036589.1	299	K	uncharacterized protein LOC107415058
