# Supplementary material for: Proteome and Acetyl-Proteome Profiling of Camellia sinensis cv. ‘Anji Baicha’ during Periodic Albinism Reveals Alterations in Photosynthetic and Secondary Metabolite Biosynthetic Pathways
Source: Front Plant Sci. 2017 Dec 11;8:2104. doi: 10.3389/fpls.2017.02104 (PMC5732353; doi:10.3389/fpls.2017.02104)
Supplement: Table S9 — DAPs in carotenoid biosynthetic pathways. [file Table9.XLSX]

## Sheet: Sheet1
Protein accession	Gene name	S2/S1 Ratio	S2/S1 P value	S3/S1 Ratio	S3/S1 P value	S3/S2 Ratio	S3/S2 P value
Carotenoid biosynthesis pathway
CSA003406.1	NCED; 9-cis-epoxycarotenoid dioxygenase [EC:1.13.11.51]	2.628	1.03e-05	2.886	6.33e-05	1.098	0.0797
CSA023948.1	LUT1; carotene epsilon-monooxygenase [EC:1.14.99.45]	1.620	7.08e-05	1.150	0.00978	0.710	0.000126
CSA031818.1	ABA2; xanthoxin dehydrogenase [EC:1.1.1.288]	1.239	0.0192	1.895	0.00198	1.530	0.00452
CSA034255.1	LUT5; beta-ring hydroxylase [EC:1.14.-.-]	1.470	0.000109	0.649	0.000576	0.441	1.07e-05
CSA036357.1	VDE; violaxanthin de-epoxidase [EC:1.23.5.1]	1.739	0.00111	3.207	5.66e-05	1.843	0.000103
CSA003415.1	GGPS; geranylgeranyl diphosphate synthase, type II [EC:2.5.1.1 2.5.1.10 2.5.1.29]	1.343	0.000133	0.881	0.015	0.657	0.000204
CSA005583.1	GGPS; geranylgeranyl diphosphate synthase, type II [EC:2.5.1.1 2.5.1.10 2.5.1.29]	1.404	0.000898	0.754	0.000309	0.537	0.000172
CSA009630.1	GGPS; geranylgeranyl diphosphate synthase, type II [EC:2.5.1.1 2.5.1.10 2.5.1.29]	1.215	0.000177	0.732	0.000385	0.603	3.99e-05
CSA027753.1	Phytoene desaturase	1.523	7.78e-05	2.426	3.39e-06	1.593	1.45e-05
CSA003738.1	Lycopene β/ε-cyclase	1.435	0.0322	1.891	0.0115	1.317	0.0241
CSA014226.1	ZEP; zeaxanthin epoxidase [EC:1.14.15.21]	1.746	0.00154	2.690	0.000168	1.541	0.000434
CSA014557.1	ZEP; zeaxanthin epoxidase [EC:1.14.15.21]	3.265	0.000159	10.620	6.16e-06	3.253	1.12e-05
CSA014558.1	ZEP; zeaxanthin epoxidase [EC:1.14.15.21]	1.865	0.0122	4.097	0.00111	2.197	0.00221
